# Supplementary material for: How Genome-Wide SNP-SNP Interactions Relate to Nasopharyngeal Carcinoma Susceptibility
Source: PubMed Central journal article supplement (PMC3871583; doi:10.1371/journal.pone.0083034), 2013-12-23
Supplement: pone.0083034.s002.pdf [file pone.0083034.s002.pdf]

**A** 7q15-17q22

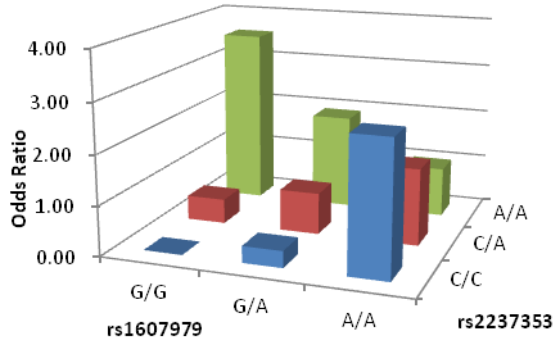

|           |     | rs1607979        |                  |                  |
|-----------|-----|------------------|------------------|------------------|
|           |     | G/G              | G/A              | A/A              |
| rs2237353 | C/C | NA               | 0.33(0.07, 1.08) | 2.68(1.44, 5.16) |
|           | C/A | 0.50(0.17, 1.26) | 0.84(0.55, 1.29) | 1.55(1.07, 2.23) |
|           | A/A | 3.57(1.69, 8.10) | 1.92(1.33, 2.79) | 1.00             |

**B** 7q11-9q33

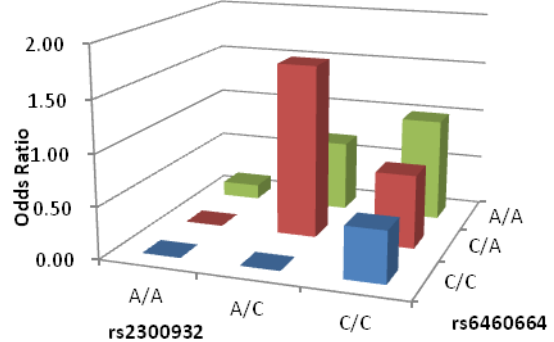

|           |     | rs2300932         |                  |                  |
|-----------|-----|-------------------|------------------|------------------|
|           |     | A/A               | A/C              | C/C              |
| rs6460664 | C/C | NA                | NA               | 0.50(0.19, 1.18) |
|           | C/A | NA                | 1.68(1.04, 2.77) | 0.71(0.51, 0.99) |
|           | A/A | 0.144(0.03, 0.43) | 0.69(0.48, 0.98) | 1.00             |

**C** 4q26-10q26

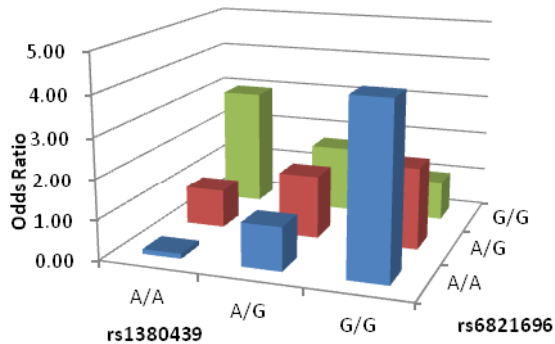

|           |     | rs1380439        |                  |                   |
|-----------|-----|------------------|------------------|-------------------|
|           |     | A/A              | A/G              | G/G               |
| rs6821696 | A/A | 0.12(0.01, 0.63) | 1.07(0.55, 2.06) | 4.28(1.75, 11.68) |
|           | A/G | 0.97(0.54, 1.72) | 1.59(1.03, 2.46) | 2.04(1.27, 3.32)  |
|           | G/G | 2.97(1.70, 5.28) | 1.68(1.11, 2.57) | 1.00              |

**D** 2q36-21q22

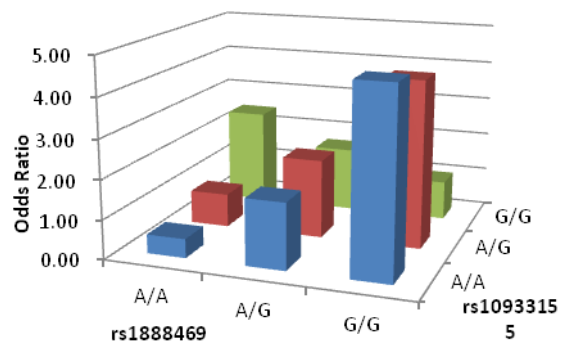

|            |     | rs1888469        |                  |                   |
|------------|-----|------------------|------------------|-------------------|
|            |     | A/A              | A/G              | G/G               |
| rs10933155 | A/A | 0.48(0.06, 2.07) | 1.69(0.70, 4.01) | 4.69(1.26, 23.35) |
|            | A/G | 0.86(0.47, 1.55) | 2.02(1.30, 3.16) | 4.25(2.43, 7.62)  |
|            | G/G | 2.45(1.52, 4.00) | 1.65(1.10, 2.51) | 1.00              |

**E** 7p21-7q31

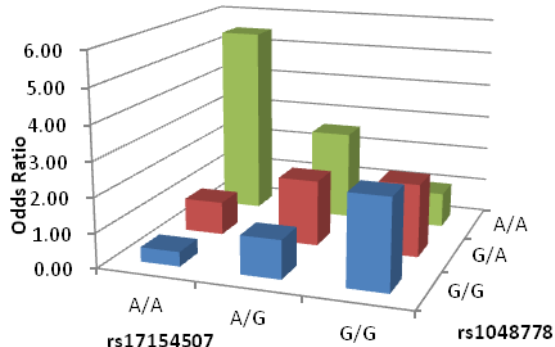

|           |     | rs17154507        |                  |                  |
|-----------|-----|-------------------|------------------|------------------|
|           |     | A/A               | A/G              | G/G              |
| rs1048778 | G/G | 0.42(0.09, 1.38)  | 1.11(0.61, 1.98) | 2.60(1.45, 4.74) |
|           | G/A | 0.96(0.49, 1.85)  | 1.90(1.22, 3.00) | 2.09(1.33, 3.33) |
|           | A/A | 5.49(2.45, 13.41) | 2.57(1.58, 4.22) | 1.00             |

**F** 9p21-16p13

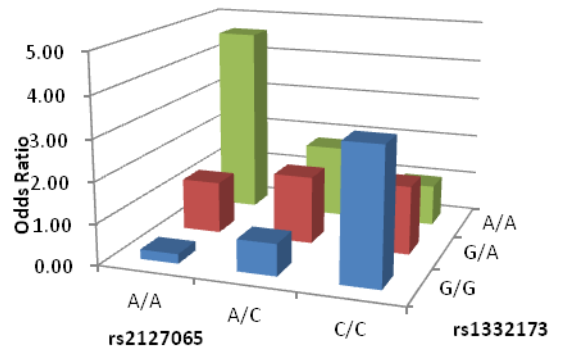

|           |     | rs2127065         |                  |                  |
|-----------|-----|-------------------|------------------|------------------|
|           |     | A/A               | A/C              | C/C              |
| rs1332173 | G/G | 0.23(0.01, 1.35)  | 0.77(0.41, 1.44) | 3.28(1.79, 6.15) |
|           | G/A | 1.28(0.69, 2.34)  | 1.65(1.06, 2.59) | 1.67(1.08, 2.59) |
|           | A/A | 4.62(2.25, 10.05) | 1.78(1.13, 2.83) | 1.00             |

**G** 2p23-9q21

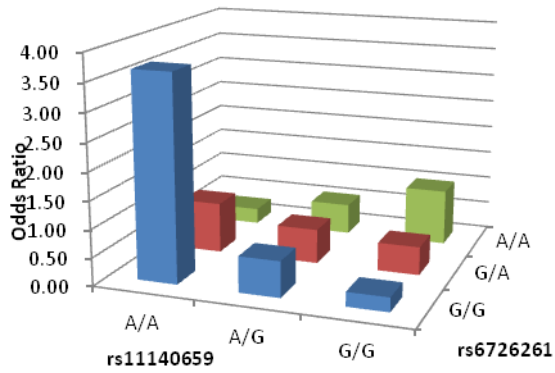

|           |     | rs11140659        |                  |                  |
|-----------|-----|-------------------|------------------|------------------|
|           |     | A/A               | A/G              | G/G              |
| rs6726261 | G/G | 3.66(1.16, 16.90) | 0.64(0.35, 1.17) | 0.25(0.10, 0.58) |
|           | G/A | 0.91(0.49, 1.70)  | 0.62(0.40, 0.95) | 0.51(0.31, 0.82) |
|           | A/A | 0.28(0.15, 0.50)  | 0.55(0.36, 0.85) | 1.00             |

**H** 2p16-2p16

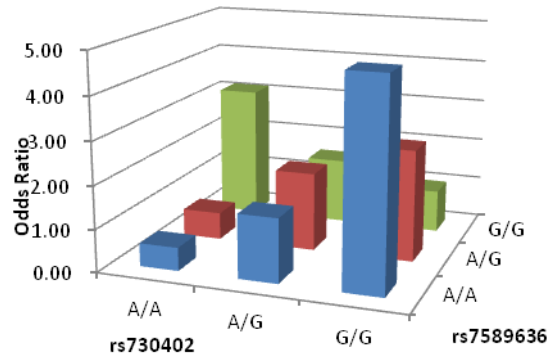

|           |     | rs730402         |                  |                   |
|-----------|-----|------------------|------------------|-------------------|
|           |     | A/A              | A/G              | G/G               |
| rs7589636 | A/A | 0.54(0.19, 1.37) | 1.50(0.83, 2.73) | 4.80(2.32, 10.38) |
|           | A/G | 0.64(0.31, 1.31) | 1.84(1.11, 3.12) | 2.61(1.52, 4.54)  |
|           | G/G | 3.13(1.58, 6.34) | 1.55(0.90, 2.71) | 1.00              |

**I** 1p34-7q36

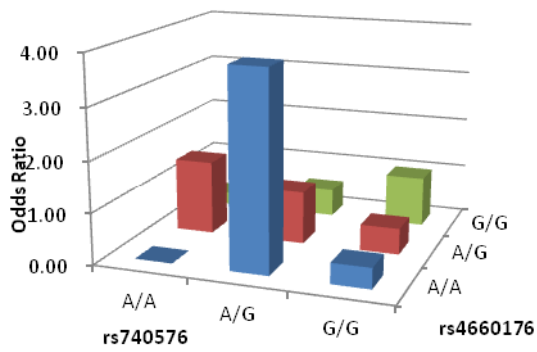

|           |     | rs740576         |                   |                  |
|-----------|-----|------------------|-------------------|------------------|
|           |     | A/A              | A/G               | G/G              |
| rs4660176 | A/A | NA               | 3.85(0.99, 27.57) | 0.40(0.20, 0.78) |
|           | A/G | 1.47(0.55, 4.41) | 1.04(0.68, 1.58)  | 0.51(0.3, 0.73)  |
|           | G/G | 0.25(0.09, 0.63) | 0.55(0.38, 0.79)  | 1.00             |

**J** 5p15-10q21

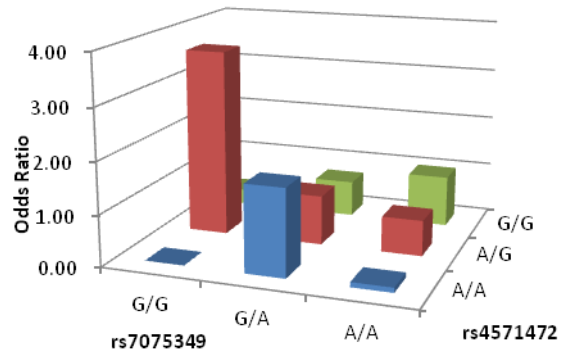

|           |     | rs7075349         |                  |                  |
|-----------|-----|-------------------|------------------|------------------|
|           |     | G/G               | G/A              | A/A              |
| rs4571472 | A/A | NA                | 1.69(0.58, 5.68) | 0.10(0.00, 0.53) |
|           | A/G | 3.64(1.54, 10.16) | 0.97(0.63, 1.48) | 0.70(0.46, 1.04) |
|           | G/G | 0.30(0.16, 0.55)  | 0.7(0.50, 0.99)  | 1.00             |

**K** 6p21-6p21 (I)

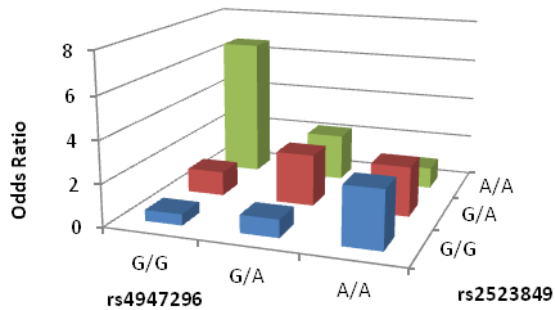

|           |     | rs4947296         |                  |                  |
|-----------|-----|-------------------|------------------|------------------|
|           |     | G/G               | G/A              | A/A              |
| rs2523849 | G/G | 0.53(0.02, 3.92)  | 0.85(0.37, 1.82) | 2.74(1.49, 5.15) |
|           | G/A | 1.17(0.47, 2.75)  | 2.47(1.60, 3.82) | 2.36(1.62, 3.45) |
|           | A/A | 6.65(3.24, 14.85) | 2.23(1.51, 3.32) | 1.00             |

**L** 6p21-6p21 (II)

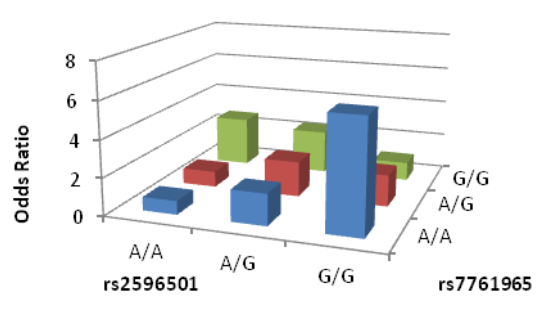

|           |     | rs2596501        |                  |                   |
|-----------|-----|------------------|------------------|-------------------|
|           |     | A/A              | A/G              | G/G               |
| rs7761965 | A/A | 0.74(0.24, 1.96) | 1.69(0.92, 3.14) | 6.04(2.82, 13.99) |
|           | A/G | 0.86(0.48, 1.52) | 1.91(1.23, 2.99) | 1.70(1.05, 2.79)  |
|           | G/G | 2.70(1.45, 5.11) | 2.36(1.48, 3.78) | 1.00              |

*Figure S2. Odds ratios for the top 10 interaction pairs and pairs in the MHC region. X and Y axes show interacting SNP genotypes. Z axis shows SNP pair odds ratios estimated relative to the baseline double-homozygote of major alleles in the combined data set.*
