# Supplementary material for: How Genome-Wide SNP-SNP Interactions Relate to Nasopharyngeal Carcinoma Susceptibility
Source: PubMed Central journal article supplement (PMC3871583; doi:10.1371/journal.pone.0083034), 2013-12-23
Supplement: pone.0083034.s004.pdf [file pone.0083034.s004.pdf]

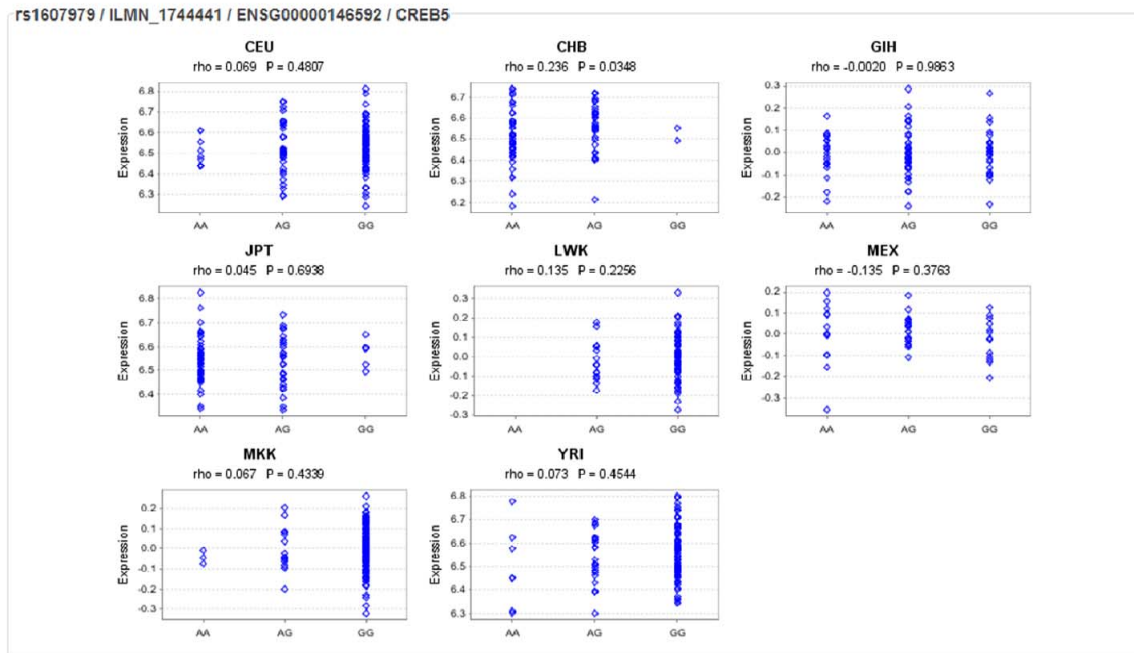

Figure S4. HapMap3 eQTL analysis between rs1607979 genotype and CREB5 gene expression profile. Genevar [1] analysis of HapMap3 data of lymphoblastoid cell lines collected from unrelated individuals of diverse ethnicity [2]. Total sample (N=726) includes (CEU=109) Caucasians from Utah, USA; (CHB=80) Han Chinese from Beijing, China; (GIH=82) Gujarati Indians from Houston, TX, USA; (JPT=82) Japanese from Tokyo, Japan; (LWK=82) Luhya in Webuye, Kenya; (MEX=45) Mexican ancestry from Los Angeles, CA, USA; (MKK=138) Maasai from Kinyawa, Kenya; and (YRI=108) Yoruba from Ibadan, Nigeria. We performed Spearman's rank correlation coefficient ( $\rho$ ) to estimate the strength of relationship between alleles and gene expression intensities and used linear regression to model the relationship between the two variables. A t-statistic with  $n-2$  degrees of freedom was used to test the significance of the relationship in both correlation and regression analyses.

## References

1. Yang TP, Beazley C, Montgomery SB, Dimas AS, Gutierrez-Arcelus M, et al. (2010) Genevar: a database and Java application for the analysis and visualization of SNP-gene associations in eQTL studies. *Bioinformatics* 26: 2474-2476.
2. Stranger BE, Montgomery SB, Dimas AS, Parts L, Stegle O, et al. (2012) Patterns of cis regulatory variation in diverse human populations. *PLoS Genet* 8: e1002639.
