# Supplementary material for: How Genome-Wide SNP-SNP Interactions Relate to Nasopharyngeal Carcinoma Susceptibility
Source: PubMed Central journal article supplement (PMC3871583; doi:10.1371/journal.pone.0083034), 2013-12-23
Supplement: pone.0083034.s006.pdf [file pone.0083034.s006.pdf]

Table S2. Suggestive interactions associated with NPC susceptibility

| Ranking <sup>a</sup> | Region A |            |             |              |             |                |              | Region B                    |              |     |            |             |              |             | Interaction P value |              |                             |              |          | Region   | LD <sup>d</sup>          |          |                          |                      |                          |    |                |  |
|----------------------|----------|------------|-------------|--------------|-------------|----------------|--------------|-----------------------------|--------------|-----|------------|-------------|--------------|-------------|---------------------|--------------|-----------------------------|--------------|----------|----------|--------------------------|----------|--------------------------|----------------------|--------------------------|----|----------------|--|
|                      | CHR      | SNP        | position    | Minor Allele | MAF in Case | MAF in Control | Major Allele | Single Locus P <sup>b</sup> | Nearest Gene | CHR | SNP        | Position    | Minor Allele | MAF in Case | MAF in Control      | Major Allele | Single Locus P <sup>b</sup> | Nearest Gene | Stage 1  |          | Permutation <sup>c</sup> | Stage 2  | Permutation <sup>c</sup> | Combine <sup>d</sup> | Permutation <sup>c</sup> | D' | r <sup>2</sup> |  |
| 984                  | 7        | rs2237353  | 28,798,214  | C            | 0.26        | 0.27           | A            | 5.03E-01                    | CREB5        | 17  | rs1607979  | 51,333,509  | G            | 0.25        | 0.25                | A            | 3.78E-01                    | KIF2B        | 9.96E-08 | 1.00E-04 | 5.87E-04                 | 9.00E-04 | 9.86E-11                 | 1.00E-04             | 1                        |    |                |  |
| 2574                 | 7        | rs2237361  | 28,832,297  | G            | 0.27        | 0.27           | A            | 3.48E-01                    | CREB5        | 17  | rs1607979  | 51,333,509  | G            | 0.25        | 0.25                | A            | 3.78E-01                    | KIF2B        | 2.25E-07 | 1.00E-04 | 1.60E-03                 | 1.80E-03 | 1.80E-03                 | 7.44E-10             | 1.00E-04                 | 1  |                |  |
| 66                   | 7        | rs6460664  | 71,000,614  | C            | 0.21        | 0.19           | A            | 2.18E-01                    | WBSCR17      | 9   | rs2300932  | 123,770,436 | A            | 0.18        | 0.18                | C            | 6.11E-01                    | C5           | 9.63E-09 | 1.00E-04 | 9.76E-03                 | 8.60E-03 | 8.86E-10                 | 1.00E-04             | 2                        |    |                |  |
| 109                  | 7        | rs6460671  | 71,020,307  | G            | 0.22        | 0.20           | A            | 2.65E-01                    | WBSCR17      | 9   | rs2300932  | 123,770,436 | A            | 0.18        | 0.18                | C            | 6.11E-01                    | C5           | 1.47E-08 | 1.00E-04 | 8.46E-03                 | 6.70E-03 | 1.49E-09                 | 1.00E-04             | 2                        |    |                |  |
| 214                  | 7        | rs6460671  | 71,020,307  | G            | 0.22        | 0.20           | A            | 2.65E-01                    | WBSCR17      | 9   | rs7389311  | 123,938,998 | G            | 0.18        | 0.19                | A            | 7.66E-01                    | CNTNL        | 2.67E-08 | 1.00E-04 | 8.49E-03                 | 7.00E-03 | 2.68E-09                 | 1.00E-04             | 2                        |    |                |  |
| 2376                 | 4        | rs6821696  | 117,226,309 | A            | 0.30        | 0.31           | G            | 2.49E-01                    | MIR1973      | 10  | rs1380439  | 127,768,110 | A            | 0.43        | 0.43                | G            | 6.89E-01                    | ADAM12       | 2.12E-07 | 1.00E-04 | 8.37E-04                 | 8.00E-04 | 8.90E-10                 | 1.00E-04             | 3                        |    |                |  |
| 300                  | 2        | rs10933155 | 227,686,907 | A            | 0.25        | 0.22           | G            | 5.33E-01                    | RHBD1        | 21  | rs1888469  | 39,899,504  | A            | 0.48        | 0.49                | G            | 9.91E-01                    | ERG          | 3.67E-08 | 1.00E-04 | 1.45E-03                 | 1.10E-03 | 1.04E-09                 | 1.00E-04             | 4                        |    |                |  |
| 388                  | 7        | rs10487781 | 14,869,205  | G            | 0.41        | 0.44           | A            | 4.38E-01                    | DGKB         | 7   | rs17154507 | 107,477,267 | A            | 0.35        | 0.35                | G            | 8.30E-01                    | DLI          | 4.58E-08 | 1.00E-04 | 2.35E-03                 | 1.60E-03 | 1.43E-09                 | 1.00E-04             | 5                        |    |                |  |
| 4627                 | 9        | rs1332173  | 25,499,778  | G            | 0.38        | 0.39           | A            | 8.01E-01                    | TUSC1        | 16  | rs2127065  | 7,201,422   | A            | 0.35        | 0.33                | C            | 3.49E-01                    | RBFOX1       | 3.64E-07 | 1.00E-04 | 4.24E-04                 | 4.00E-04 | 1.76E-09                 | 1.00E-04             | 6                        |    |                |  |
| 5505                 | 9        | rs1360523  | 25,499,778  | A            | 0.38        | 0.39           | C            | 7.55E-01                    | TUSC1        | 16  | rs2127065  | 7,201,422   | A            | 0.35        | 0.33                | C            | 3.49E-01                    | RBFOX1       | 4.20E-07 | 1.00E-04 | 5.57E-04                 | 6.00E-04 | 2.69E-09                 | 1.00E-04             | 6                        |    |                |  |
| 4561                 | 9        | rs1591029  | 25,500,488  | G            | 0.38        | 0.39           | A            | 8.02E-01                    | TUSC1        | 16  | rs2127065  | 7,201,422   | A            | 0.35        | 0.33                | C            | 3.49E-01                    | RBFOX1       | 3.60E-07 | 1.00E-04 | 6.46E-04                 | 7.00E-04 | 2.69E-09                 | 1.00E-04             | 6                        |    |                |  |
| 7908                 | 9        | rs1591029  | 25,499,081  | G            | 0.38        | 0.39           | A            | 7.55E-01                    | TUSC1        | 16  | rs899305   | 7,200,563   | G            | 0.37        | 0.35                | A            | 2.91E-01                    | RBFOX1       | 5.61E-07 | 1.00E-04 | 2.42E-03                 | 2.60E-03 | 1.52E-08                 | 1.00E-04             | 6                        |    |                |  |
| 9458                 | 9        | rs1360523  | 25,499,778  | A            | 0.38        | 0.39           | C            | 8.02E-01                    | TUSC1        | 16  | rs899305   | 7,200,563   | G            | 0.37        | 0.35                | A            | 2.91E-01                    | RBFOX1       | 6.47E-07 | 1.00E-04 | 2.17E-03                 | 2.30E-03 | 1.52E-08                 | 1.00E-04             | 6                        |    |                |  |
| 7988                 | 9        | rs1332173  | 25,500,488  | G            | 0.38        | 0.39           | A            | 8.01E-01                    | TUSC1        | 16  | rs899305   | 7,200,563   | G            | 0.37        | 0.35                | A            | 2.91E-01                    | RBFOX1       | 5.66E-07 | 1.00E-04 | 2.42E-03                 | 2.60E-03 | 1.54E-08                 | 1.00E-04             | 6                        |    |                |  |
| 2517                 | 2        | rs6726261  | 25,153,986  | G            | 0.34        | 0.33           | A            | 4.51E-01                    | ADCY3        | 9   | rs11140659 | 87,162,611  | A            | 0.42        | 0.43                | G            | 4.23E-01                    | NTRK2        | 2.21E-07 | 1.00E-04 | 3.85E-03                 | 3.30E-03 | 1.92E-09                 | 1.00E-04             | 7                        |    |                |  |
| 6163                 | 2        | rs7589636  | 57,690,033  | A            | 0.45        | 0.44           | G            | 5.47E-01                    | VRK2         | 2   | rs730402   | 60,094,705  | A            | 0.38        | 0.45                | G            | 2.73E-02                    | MIR4432      | 4.59E-07 | 1.00E-04 | 1.47E-03                 | 1.20E-03 | 2.11E-09                 | 1.00E-04             | 8                        |    |                |  |
| 2409                 | 2        | rs6545648  | 57,657,943  | A            | 0.41        | 0.40           | G            | 3.54E-01                    | VRK2         | 2   | rs730402   | 60,094,705  | A            | 0.38        | 0.45                | G            | 2.73E-02                    | MIR4432      | 2.14E-07 | 1.00E-04 | 3.61E-03                 | 2.60E-03 | 2.72E-09                 | 1.00E-04             | 8                        |    |                |  |
| 3985                 | 2        | rs13410950 | 57,653,054  | G            | 0.41        | 0.40           | A            | 3.52E-01                    | VRK2         | 2   | rs730402   | 60,094,705  | A            | 0.38        | 0.45                | G            | 2.73E-02                    | MIR4432      | 3.23E-07 | 1.00E-04 | 3.53E-03                 | 2.60E-03 | 4.04E-09                 | 1.00E-04             | 8                        |    |                |  |
| 7221                 | 2        | rs6545648  | 57,657,943  | A            | 0.41        | 0.40           | G            | 3.54E-01                    | VRK2         | 2   | rs7566185  | 60,091,600  | G            | 0.39        | 0.45                | A            | 3.77E-02                    | MIR4432      | 5.20E-07 | 1.00E-04 | 5.76E-03                 | 4.00E-03 | 1.07E-08                 | 1.00E-04             | 8                        |    |                |  |
| 8827                 | 2        | rs13410950 | 57,653,054  | G            | 0.41        | 0.40           | A            | 3.52E-01                    | VRK2         | 2   | rs6545760  | 60,101,211  | G            | 0.37        | 0.45                | A            | 2.82E-02                    | MIR4432      | 6.12E-07 | 1.00E-04 | 9.97E-03                 | 7.30E-03 | 2.08E-08                 | 1.00E-04             | 8                        |    |                |  |
| 581                  | 1        | rs4660176  | 41,293,649  | A            | 0.26        | 0.27           | G            | 3.08E-01                    | KCNQ4        | 7   | rs740576   | 153,586,831 | A            | 0.23        | 0.23                | G            | 8.98E-01                    | DPP6         | 6.33E-08 | 1.00E-04 | 2.97E-03                 | 3.70E-03 | 2.11E-09                 | 1.00E-04             | 9                        |    |                |  |
| 9105                 | 5        | rs4571472  | 15,721,360  | A            | 0.20        | 0.18           | G            | 3.10E-01                    | FBXL7        | 10  | rs7075349  | 64,427,849  | G            | 0.31        | 0.32                | A            | 2.74E-01                    | ZNF365       | 6.28E-07 | 1.00E-04 | 1.93E-03                 | 1.60E-03 | 3.38E-09                 | 1.00E-04             | 10                       |    |                |  |
| 274                  | 6        | rs9403288  | 141,672,900 | G            | 0.30        | 0.28           | A            | 3.94E-01                    | AKO97143     | 10  | rs1904382  | 65,550,685  | G            | 0.23        | 0.20                | A            | 1.59E-01                    | REEP3        | 3.32E-08 | 1.00E-04 | 8.32E-03                 | 7.90E-03 | 4.94E-09                 | 1.00E-04             | 11                       |    |                |  |
| 273                  | 6        | rs9399364  | 141,692,825 | G            | 0.30        | 0.28           | A            | 3.94E-01                    | AKO97143     | 10  | rs1904382  | 65,550,685  | G            | 0.23        | 0.20                | A            | 1.59E-01                    | REEP3        | 3.32E-08 | 1.00E-04 | 8.32E-03                 | 7.90E-03 | 4.94E-09                 | 1.00E-04             | 11                       |    |                |  |
| 4782                 | 12       | rs6539598  | 82,290,233  | G            | 0.32        | 0.31           | A            | 3.92E-01                    | PPF1A2       | 17  | rs7208838  | 30,468,566  | G            | 0.22        | 0.22                | A            | 3.23E-01                    | RHOT1        | 3.74E-07 | 1.00E-04 | 4.27E-03                 | 4.40E-03 | 5.28E-09                 | 1.00E-04             | 12                       |    |                |  |
| 5797                 | 12       | rs10862392 | 82,318,628  | A            | 0.32        | 0.31           | G            | 3.70E-01                    | PPF1A2       | 17  | rs7208838  | 30,468,566  | G            | 0.22        | 0.22                | A            | 3.23E-01                    | RHOT1        | 4.39E-07 | 1.00E-04 | 4.27E-03                 | 4.40E-03 | 6.12E-09                 | 1.00E-04             | 12                       |    |                |  |
| 5617                 | 12       | rs6539598  | 82,290,233  | G            | 0.32        | 0.31           | A            | 3.92E-01                    | PPF1A2       | 17  | rs7210733  | 30,567,339  | G            | 0.22        | 0.22                | A            | 4.04E-01                    | RHOT1        | 4.28E-07 | 1.00E-04 | 8.12E-03                 | 8.40E-03 | 1.22E-08                 | 1.00E-04             | 12                       |    |                |  |
| 6849                 | 12       | rs10862392 | 82,318,628  | A            | 0.32        | 0.31           | G            | 3.70E-01                    | PPF1A2       | 17  | rs7210733  | 30,567,339  | G            | 0.22        | 0.22                | A            | 4.04E-01                    | RHOT1        | 5.01E-07 | 1.00E-04 | 8.12E-03                 | 8.40E-03 | 1.41E-08                 | 1.00E-04             | 12                       |    |                |  |
| 2515                 | 5        | rs37181    | 115,630,004 | C            | 0.41        | 0.41           | A            | 7.61E-01                    | COMMD10      | 10  | rs512064   | 84,623,726  | A            | 0.36        | 0.37                | C            | 1.69E-01                    | NRG3         | 2.20E-07 | 1.00E-04 | 4.84E-03                 | 3.80E-03 | 7.30E-09                 | 1.00E-04             | 13                       |    |                |  |
| 3934                 | 5        | rs712572   | 115,634,127 | G            | 0.41        | 0.41           | A            | 5.19E-01                    | COMMD10      | 10  | rs512064   | 84,623,726  | A            | 0.36        | 0.37                | C            | 3.18E-01                    | NRG3         | 3.19E-07 | 1.00E-04 | 4.84E-03                 | 3.80E-03 | 9.78E-09                 | 1.00E-04             | 13                       |    |                |  |
| 4611                 | 5        | rs37181    | 115,630,004 | C            | 0.41        | 0.41           | A            | 5.66E-01                    | COMMD10      | 10  | rs560083   | 84,614,844  | A            | 0.34        | 0.36                | G            | 4.67E-01                    | NRG3         | 3.63E-07 | 1.00E-04 | 7.13E-03                 | 5.40E-03 | 1.51E-08                 | 1.00E-04             | 13                       |    |                |  |
| 7110                 | 5        | rs712572   | 115,634,127 | G            | 0.41        | 0.41           | A            | 5.19E-01                    | COMMD10      | 10  | rs560083   | 84,614,844  | A            | 0.34        | 0.36                | G            | 4.67E-01                    | NRG3         | 5.14E-07 | 1.00E-04 | 7.13E-03                 | 5.40E-03 | 2.00E-08                 | 1.00E-04             | 13                       |    |                |  |
| 5503                 | 7        | rs6979066  | 82,422,937  | G            | 0.47        | 0.48           | A            | 1.50E-01                    | PCLO         | 16  | rs1861315  | 52,302,072  | A            | 0.41        | 0.41                | C            | 5.32E-01                    | Mir 548      | 4.20E-07 | 1.00E-04 | 7.10E-03                 | 6.10E-03 | 1.08E-08                 | 1.00E-04             | 14                       |    |                |  |
| 3591                 | 10       | rs1413615  | 99,803,197  | G            | 0.19        | 0.20           | A            | 9.45E-01                    | CR2AC1       | 13  | rs2018259  | 53,523,952  | A            | 0.40        | 0.42                | G            | 7.74E-02                    | OLFML4       | 2.95E-07 | 1.00E-04 | 2.62E-03                 | 1.80E-03 | 1.10E-08                 | 1.00E-04             | 15                       |    |                |  |
| 4632                 | 13       | rs982790   | 91,232,023  | G            | 0.43        | 0.44           | A            | 3.82E-01                    | BC038529     | 13  | rs816960   | 108,522,521 | A            | 0.48        | 0.49                | G            | 2.38E-01                    | FAM155A      | 3.64E-07 | 1.00E-04 | 4.05E-03                 | 4.20E-03 | 2.78E-08                 | 1.00E-04             | 16                       |    |                |  |
| 5645                 | 9        | rs10974873 | 4,943,704   | G            | 0.35        | 0.32           | A            | 4.63E-01                    | JAK2         | 16  | rs12932445 | 73,069,888  | G            | 0.36        | 0.36                | A            | 2.79E-01                    | ZFXH3        | 4.30E-07 | 1.00E-04 | 9.20E-03                 | 8.10E-03 | 1.19E-08                 | 1.00E-04             | 17                       |    |                |  |
| 8431                 | 1        | rs12120788 | 157,237,624 | C            | 0.13        | 0.11           | A            | 4.86E-01                    | ETV3         | 18  | rs489631   | 21,989,024  | G            | 0.34        | 0.35                | A            | 7.04E-01                    | IMPACT       | 5.91E-07 | 1.00E-04 | 5.14E-03                 | 4.80E-03 | 1.43E-08                 | 1.00E-04             | 18                       |    |                |  |
| 9186                 | 4        | rs918402   | 181,691,988 | C            | 0.30        | 0.31           | A            | 2.52E-01                    | LINC00290    | 13  | rs9534199  | 46,291,526  | A            | 0.51        | 0.49                | G            | 6.31E-01                    | SPERT        | 6.32E-07 | 1.00E-04 | 1.66E-03                 | 9.00E-04 | 1.50E-08                 | 1.00E-04             | 19                       |    |                |  |
| 3089                 | 7        | rs4728351  | 75,364,117  | A            | 0.27        | 0.28           | G            | 2.44E-01                    | HIP1         | 8   | rs10112728 | 68,574,359  | G            | 0.12        | 0.17                | A            | 7.10E-02                    | CPA6         | 2.65E-07 | 1.00E-04 | 5.82E-03                 | 5.60E-03 | 1.51E-08                 | 1.00E-04             | 20                       |    |                |  |
| 1729                 | 7        | rs75359    | 75,367,376  | G            | 0.28        | 0.28           | A            | 3.05E-01                    | HIP1         | 8   | rs10112728 | 68,574,359  | G            | 0.12        | 0.17                | A            | 7.10E-02                    | CPA6         | 1.61E-07 | 1.00E-04 | 8.93E-03                 | 8.30E-03 | 1.93E-08                 | 1.00E-04             | 20                       |    |                |  |
| 5490                 | 2        | rs17442753 | 19,646,340  | A            | 0.21        | 0.20           | G            | 6.90E-01                    | OSR1         | 12  | rs1683163  | 25,233,618  | A            | 0.30        | 0.34                | G            | 2.18E-01                    | LMP4         | 4.19E-07 | 1.00E-04 | 6.54E-03                 | 7.10E-03 | 1.79E-08                 | 1.00E-04             | 21                       |    |                |  |
| 8036                 | 1        | rs2997338  | 41,872,328  | C            | 0.37        | 0.43           | A            | 3.21E-02                    | EDN2         | 5   | rs11960332 | 180,071,276 | G            | 0.46        | 0.45                | A            | 6.87E-01                    | FLT4         | 5.69E-07 | 1.00E-04 | 5.34E-03                 | 4.80E-03 | 1.97E-08                 | 1.00E-04             | 22                       |    |                |  |
| 5296                 | 13       | rs2761367  | 32,979,647  | A            | 0.32        | 0.27           | C            | 1.63E-02                    | N4BP2L1      | 17  | rs8066210  | 10,022,443  | G            | 0.36        | 0.38                | A            | 3.42E-01                    | GAS7         | 4.07E-07 | 1.00E-04 | 2.95E-03                 | 2.20E-03 | 2.03E-08                 | 1.00E-04             | 23                       |    |                |  |
| 7726                 | 4        | rs17258848 | 127,536,771 | G            | 0.23        | 0.26           | A            | 9.43                        |              |     |            |             |              |             |                     |              |                             |              |          |          |                          |          |                          |                      |                          |    |                |  |
