# Supplementary material for: How Genome-Wide SNP-SNP Interactions Relate to Nasopharyngeal Carcinoma Susceptibility
Source: PubMed Central journal article supplement (PMC3871583; doi:10.1371/journal.pone.0083034), 2013-12-23
Supplement: pone.0083034.s007.pdf [file pone.0083034.s007.pdf]

Table S3. Suggestive regions associated with NPC susceptibility

| Region A          |             |             |                  |               |           |                   |                                     |                             | Region B |             |             |             |            |          |                   | Interaction P values               |                             |          |                          |          | Region   | Significant Interaction Number |                          |          |                          |    |   |
|-------------------|-------------|-------------|------------------|---------------|-----------|-------------------|-------------------------------------|-----------------------------|----------|-------------|-------------|-------------|------------|----------|-------------------|------------------------------------|-----------------------------|----------|--------------------------|----------|----------|--------------------------------|--------------------------|----------|--------------------------|----|---|
| Chr.              | Start bp    | End bp      | SNP <sup>a</sup> | Location      | Distance  | Note <sup>a</sup> | Gene                                | Single Locus P <sup>b</sup> | Chr.     | Start bp    | End bp      | SNP         | Location   | Distance | Note <sup>a</sup> | Gene                               | Single Locus P <sup>b</sup> | Stage 1  | Permutation <sup>d</sup> | Stage 2  |          |                                | Permutation <sup>d</sup> | Combined | Permutation <sup>d</sup> |    |   |
| 7                 | 28,798,214  | 28,832,297  | rs2237353        | intron        |           |                   | CREB5                               | 5.03E-01                    | 17       | 51,333,509  | 51,333,509  | rs1607979   | upstream   | 566,730  |                   | KIF2B                              | 3.78E-01                    | 9.96E-08 | 1.00E-04                 | 5.87E-04 | 9.00E-04 | 9.86E-11                       | 1.00E-04                 | 1        | 2                        |    |   |
| 7                 | 71,000,614  | 71,020,307  | rs6460664        | intron        |           |                   | WBSCR17                             | 2.18E-01                    | 9        | 123,770,436 | 123,938,998 | rs2300932   | intron     |          |                   | C5                                 | 6.11E-01                    | 9.63E-09 | 1.00E-04                 | 9.76E-03 | 8.60E-03 | 8.86E-10                       | 1.00E-04                 | 2        | 3                        |    |   |
| 4                 | 117,226,309 | 117,226,309 | rs8821696        | downstream    | 5,428     |                   | MIR1973                             | 2.49E-01                    | 10       | 127,768,110 | 127,768,110 | rs1380439   | intron     |          |                   | ADAM12                             | 6.89E-01                    | 2.12E-07 | 1.00E-04                 | 8.37E-04 | 8.00E-04 | 8.90E-10                       | 1.00E-04                 | 3        | 1                        |    |   |
| 2                 | 227,686,907 | 227,686,907 | rs10933155       | upstream      | 13,764    |                   | RHBDD1                              | 5.33E-01                    | 21       | 39,899,504  | 39,899,504  | rs1888469   | intron     |          |                   | ERG                                | 9.91E-01                    | 3.67E-08 | 1.00E-04                 | 1.45E-03 | 1.10E-03 | 1.04E-09                       | 1.00E-04                 | 4        | 1                        |    |   |
| 7                 | 14,869,205  | 14,869,205  | rs10487781       | intron        |           |                   | DGKB                                | 4.38E-01                    | 7        | 107,477,267 | 107,477,267 | rs17154507  | upstream   | 54,319   |                   | DNase I hyper 38, TF Chip-Seq site | DLD                         | 8.30E-01 | 4.58E-08                 | 1.00E-04 | 2.35E-03 | 1.60E-03                       | 1.43E-09                 | 1.00E-04 | 5                        | 1  |   |
| 9                 | 25,499,081  | 25,500,488  | rs1332173        | upstream      | 175,899   |                   | TUSC1                               | 8.01E-01                    | 16       | 7,200,563   | 7,200,563   | rs2127065   | intron     |          |                   | RBFOX1                             | 3.49E-01                    | 3.64E-07 | 1.00E-04                 | 4.24E-04 | 4.00E-04 | 1.76E-09                       | 1.00E-04                 | 6        | 6                        |    |   |
| 2                 | 25,153,986  | 25,153,986  | rs6726261        | upstream      | 11,931    |                   | DNase I hyper 43, TF Chip-Seq       | ADCY3                       | 4.51E-01 | 9           | 87,162,611  | 87,162,611  | rs11140659 | upstream | 120,855           |                                    | NTRK2                       | 4.23E-01 | 1.21E-07                 | 1.00E-04 | 3.85E-03 | 3.30E-03                       | 1.92E-09                 | 1.00E-04 | 7                        | 1  |   |
| 2                 | 57,653,054  | 57,690,033  | rs7589636        | upstream      | 444,753   |                   | VRK2                                | 5.47E-01                    | 2        | 60,077,001  | 60,101,211  | rs730402    | upstream   | 513,286  |                   | MIR4432                            | 2.73E-02                    | 4.59E-07 | 1.00E-04                 | 1.47E-03 | 1.20E-03 | 2.11E-09                       | 1.00E-04                 | 8        | 5                        |    |   |
| 1                 | 41,293,649  | 41,293,649  | rs4660176        | intron        |           |                   | KCNQ4                               | 3.08E-01                    | 7        | 153,586,831 | 153,586,831 | rs740576    | intron     |          |                   | PPP6C                              | 8.98E-01                    | 6.33E-08 | 1.00E-04                 | 2.97E-03 | 3.70E-03 | 2.11E-09                       | 1.00E-04                 | 9        | 1                        |    |   |
| 5                 | 15,721,360  | 15,721,360  | rs4571472        | intron        |           |                   | FBXL7                               | 3.10E-01                    | 10       | 64,427,649  | 64,427,649  | rs7075349   | intron     |          |                   | DNase I hyper 3                    | ZNF365                      | 6.74E-01 | 6.28E-07                 | 1.00E-04 | 1.93E-03 | 1.60E-03                       | 3.38E-09                 | 1.00E-04 | 10                       | 1  |   |
| 6                 | 141,692,825 | 141,672,900 | rs9399364        | downstream    | 209,954   |                   | AK097143                            | 3.94E-01                    | 10       | 65,550,685  | 65,550,685  | rs1904382   | downstream | 165,802  |                   | DNase I hyper 122, TF CHIP-Seq     | REEP3                       | 1.59E-01 | 3.32E-08                 | 1.00E-04 | 8.32E-03 | 7.90E-03                       | 4.94E-09                 | 1.00E-04 | 11                       | 2  |   |
| 12                | 82,290,233  | 82,318,628  | rs6539598        | upstream      | 137,947   |                   | PPFIA2                              | 3.92E-01                    | 17       | 30,468,566  | 30,567,339  | rs7208838   | upstream   | 907      |                   | RHOT1                              | 3.23E-01                    | 3.74E-07 | 1.00E-04                 | 4.27E-03 | 4.40E-03 | 5.28E-09                       | 1.00E-04                 | 12       | 4                        |    |   |
| 5                 | 115,630,004 | 115,634,127 | rs37181          | upstream      | 1,026     |                   | COMMD10                             | 7.61E-01                    | 10       | 84,614,844  | 84,623,726  | rs512064    | intron     |          |                   | NRG3                               | 1.69E-01                    | 2.20E-07 | 1.00E-04                 | 4.84E-03 | 3.80E-03 | 7.30E-09                       | 1.00E-04                 | 13       | 4                        |    |   |
| 7                 | 82,422,937  | 82,422,937  | rs6979066        | intron        |           |                   | PCL0                                | 1.50E-01                    | 16       | 52,302,072  | 52,302,072  | rs1861315   | upstream   | 12,611   |                   | Mir_548                            | 5.32E-01                    | 4.20E-07 | 1.00E-04                 | 7.10E-03 | 6.10E-03 | 1.08E-08                       | 1.00E-04                 | 14       | 1                        |    |   |
| 10                | 99,803,197  | 99,803,197  | rs1413615        | upstream      | 12,612    |                   | CRTAC1                              | 9.45E-01                    | 13       | 53,523,952  | 53,523,952  | rs2018259   | upstream   | 78,924   |                   | OLFAM4                             | 7.74E-02                    | 2.95E-07 | 1.00E-04                 | 2.62E-03 | 1.80E-03 | 1.10E-08                       | 1.00E-04                 | 15       | 1                        |    |   |
| 6                 | 96,111,622  | 96,111,622  | rs6907357        | downstream    | 54,294    |                   | MANEA                               | 3.82E-01                    | 22       | 49,059,556  | 49,059,556  | rs9617490   | intron     |          |                   | FAM19A5                            | 2.38E-01                    | 1.72E-07 | 1.00E-04                 | 6.38E-03 | 4.20E-03 | 1.17E-08                       | 1.00E-04                 | 16       | 1                        |    |   |
| 9                 | 4,943,704   | 4,943,704   | rs10974873       | upstream      | 41,382    |                   | JAK2                                | 4.63E-01                    | 16       | 73,069,888  | 73,069,888  | rs12932445  | intron     |          |                   | ZFXH3                              | 2.79E-01                    | 4.30E-07 | 1.00E-04                 | 9.20E-03 | 8.10E-03 | 1.19E-08                       | 1.00E-04                 | 17       | 1                        |    |   |
| 1                 | 157,237,624 | 157,237,624 | rs12120788       | upstream      | 129,247   |                   | ETV3                                | 4.86E-01                    | 18       | 21,989,024  | 21,989,024  | rs489631    | upstream   | 17,585   |                   | IMPACT                             | 7.04E-01                    | 5.91E-07 | 1.00E-04                 | 5.14E-03 | 4.80E-03 | 1.43E-08                       | 1.00E-04                 | 18       | 1                        |    |   |
| 4                 | 181,691,988 | 181,691,988 | rs918402         | downstream    | 293,255   |                   | LINC00290                           | 2.52E-01                    | 13       | 46,291,526  | 46,291,526  | rs9534199   | downstream | 2,833    |                   | SPERT                              | 6.71E-01                    | 6.32E-07 | 1.00E-04                 | 1.66E-03 | 9.00E-04 | 1.50E-08                       | 1.00E-04                 | 19       | 1                        |    |   |
| 7                 | 75,364,117  | 75,367,376  | rs4728351        | intron        |           |                   | DNase I hyper 86, TF CHIP-Seq       | HIP1                        | 2.44E-01 | 8           | 68,574,359  | 68,574,359  | rs10112728 | intron   |                   | CPA6                               | 7.10E-02                    | 2.65E-07 | 1.00E-04                 | 5.82E-03 | 5.60E-03 | 1.51E-08                       | 1.00E-04                 | 20       | 2                        |    |   |
| 2                 | 19,646,340  | 19,646,340  | rs17442753       | upstream      | 87,968    |                   | OSR1                                | 6.90E-01                    | 12       | 25,233,618  | 25,233,618  | rs1683163   | intron     |          |                   | LRMP                               | 2.18E-01                    | 4.19E-07 | 1.00E-04                 | 6.54E-03 | 7.10E-03 | 1.79E-08                       | 1.00E-04                 | 21       | 1                        |    |   |
| 1                 | 41,872,328  | 41,872,328  | rs2997338        | downstream    | 72,118    |                   | EDN2                                | 3.21E-02                    | 5        | 180,071,276 | 180,071,276 | rs11960332  | intron     |          |                   | FLT4                               | 6.87E-01                    | 5.69E-07 | 1.00E-04                 | 5.34E-03 | 4.80E-03 | 1.97E-08                       | 1.00E-04                 | 22       | 1                        |    |   |
| 13                | 32,979,647  | 32,979,647  | rs2761367        | intron        |           |                   | N4BP2L1                             | 1.63E-02                    | 17       | 10,022,443  | 10,022,443  | rs8066210   | intron     |          |                   | GAS7                               | 3.42E-01                    | 4.07E-07 | 1.00E-04                 | 2.95E-03 | 2.20E-03 | 2.03E-08                       | 1.00E-04                 | 23       | 1                        |    |   |
| 4                 | 127,536,771 | 127,536,771 | rs17258848       | upstream      | 1,017,319 |                   | INTU                                | 9.43E-01                    | 15       | 67,442,386  | 67,442,386  | rs11637659  | intron     |          |                   | H3K27Ac, TF CHIP-Seq               | SMAD3                       | 4.59E-01 | 5.53E-07                 | 1.00E-04 | 1.98E-03 | 1.80E-03                       | 2.24E-08                 | 1.00E-04 | 24                       | 1  |   |
| 6                 | 65,453,785  | 65,453,785  | rs6934929        | intron        |           |                   | EYS                                 | 6.41E-01                    | 21       | 31,429,636  | 31,429,636  | rs7276462   | upstream   | 117,354  |                   | GRIK1                              | 1.67E-01                    | 3.15E-07 | 1.00E-04                 | 7.15E-03 | 4.10E-03 | 2.49E-08                       | 1.00E-04                 | 25       | 1                        |    |   |
| 13                | 91,232,023  | 91,232,023  | rs982790         | downstream    | 44,428    |                   | BC038529                            | 7.07E-01                    | 13       | 108,522,521 | 108,522,521 | rs816960    | intron     |          |                   | FAM155A                            | 4.81E-03                    | 3.64E-07 | 1.00E-04                 | 4.05E-03 | 4.50E-03 | 2.78E-08                       | 1.00E-04                 | 26       | 1                        |    |   |
| 5                 | 149,406,271 | 149,406,271 | rs6579767        | coding-synon, |           |                   | HMGXB3                              | 3.01E-01                    | 10       | 32,659,387  | 32,659,387  | rs2505366   | intron     |          |                   | EPC1                               | 6.73E-01                    | 4.26E-07 | 1.00E-04                 | 7.85E-03 | 6.60E-03 | 3.06E-08                       | 1.00E-04                 | 27       | 1                        |    |   |
| 1                 | 24,876,383  | 24,876,383  | rs2776747        | upstream      | 6,183     |                   | C1orf130                            | 9.07E-01                    | 2        | 70,980,886  | 70,980,886  | rs17006285  | intron     |          |                   | ADD2                               | 9.17E-01                    | 4.46E-07 | 1.00E-04                 | 6.83E-03 | 6.30E-03 | 3.32E-08                       | 1.00E-04                 | 28       | 1                        |    |   |
| 12                | 74,681,897  | 74,681,897  | rs10128762       | intron        |           |                   | LOC100507377                        | 7.81E-01                    | 21       | 19,055,529  | 19,065,455  | rs2824444   | upstream   | 77,929   |                   | H3K27Ac, DNase I hypersensitivity  | BTG3                        | 2.72E-01 | 2.14E-07                 | 1.00E-04 | 1.56E-03 | 1.80E-03                       | 3.39E-08                 | 1.00E-04 | 29                       | 3  |   |
| 5                 | 172,230,002 | 172,230,002 | rs10057387       | upstream      | 31,799    |                   | DNase I hyper 98, H3K27Ac, CHIP-Seq | DUSP1                       | 3.26E-01 | 19          | 32,779,618  | 32,779,618  | rs2111505  | upstream | 56,895            |                                    | ZNF507                      | 5.00E-02 | 6.44E-07                 | 1.00E-04 | 6.75E-03 | 5.80E-03                       | 3.92E-08                 | 1.00E-04 | 30                       | 1  |   |
| 3                 | 118,364,856 | 118,364,856 | rs9867490        | intron        |           |                   | EU250752                            | 3.21E-01                    | 7        | 57,417,568  | 57,417,568  | rs2894771   | upstream   | 55,463   |                   | MIR3147                            | 8.87E-01                    | 5.82E-07 | 1.00E-04                 | 6.72E-03 | 7.00E-03 | 4.09E-08                       | 1.00E-04                 | 31       | 1                        |    |   |
| 2                 | 230,034,082 | 230,068,786 | rs12478812       | intron        |           |                   | PID1                                | 4.41E-01                    | 3        | 3,810,973   | 3,810,973   | rs1352409   | downstream | 591,856  |                   | SUMF1                              | 1.45E-01                    | 6.05E-07 | 1.00E-04                 | 9.79E-03 | 1.07E-02 | 4.33E-08                       | 1.00E-04                 | 32       | 1                        |    |   |
| 6                 | 1,607,603   | 1,607,603   | rs2235718        | upstream      | 3,078     |                   | DNase I hyper 55                    | FOXC1                       | 1.38E-01 | 1           | 109,221,612 | 109,221,612 | rs11102213 | upstream | 13,320            |                                    | DNase I hyper 4, CHIP-Seq   | PRPF38B  | 4.65E-01                 | 6.66E-07 | 1.00E-04 | 7.77E-03                       | 8.90E-03                 | 4.57E-08 | 1.00E-04                 | 33 | 1 |
| 7                 | 147,868,281 | 147,868,281 | rs6973203        | intron        |           |                   | CNTNAP2                             | 1.84E-01                    | 19       | 6,945,861   | 6,951,434   | rs376620    | downstream | 5,397    |                   | EMR1                               | 5.37E-01                    | 2.67E-07 | 1.00E-04                 | 9.69E-03 | 8.50E-03 | 7.76E-08                       | 1.00E-04                 | 34       | 1                        |    |   |
| 12                | 115,135,430 | 115,135,430 | rs1354156        | upstream      | 13,461    |                   | TBX3                                | 1.51E-02                    | 17       | 37,610,123  | 37,610,123  | rs11655550  | upstream   | 2,596    |                   | CHIP-Seq                           | MED1                        | 5.95E-02 | 5.25E-07                 | 1.00E-04 | 8.48E-03 | 8.30E-03                       | 8.85E-08                 | 1.00E-04 | 35                       | 1  |   |
| 4                 | 22,293,242  | 22,293,242  | rs1500453        | downstream    | 35,747    |                   | LOC100505912                        | 9.12E-01                    | 17       | 65,211,876  | 65,211,876  | rs10512514  | intron     |          |                   | HELZ                               | 1.53E-01                    | 6.41E-07 | 1.00E-04                 | 9.24E-03 | 8.80E-03 | 2.02E-07                       | 1.00E-04                 | 36       | 1                        |    |   |
| 10                | 86,380,227  | 86,380,227  | rs11201128       | upstream      | 246,466   |                   | FAM190B                             | 7.10E-01                    | 20       | 23,446,322  | 23,446,429  | rs6114101   | upstream   | 12,840   |                   | CST11                              | 3.37E-01                    | 6.36E-07 | 1.00E-04                 | 9.18E-03 | 8.90E-03 | 2.08E-07                       | 1.00E-04                 | 37       | 2                        |    |   |
| <b>MHC region</b> |             |             |                  |               |           |                   |                                     |                             |          |             |             |             |            |          |                   |                                    |                             |          |                          |          |          |                                |                          |          |                          |    |   |
| 6                 | 31,018,546  | 31,273,495  | rs2523849        | intron        |           |                   | HCG22                               | 4.48E-01                    | 6        | 31,049,655  | 31,340,611  | rs4947296   | downstream | 20,822   |                   | C6orf15                            | 1.90E-01                    | 4.28E-07 | 1.00E-04                 | 1.97E-03 | 1.60E-03 | 8.42E-09                       | 1.00E-04                 | 38       | 5                        |    |   |
| 6                 | 31,273,495  | 31,139,452  | rs7761965        | downstream    | 48,764    |                   | HLA-B                               | 8.90E-01                    | 6        | 31,321,211  | 31,340,611  |             |            |          |                   |                                    |                             |          |                          |          |          |                                |                          |          |                          |    |   |
