# Supplementary material for: How Genome-Wide SNP-SNP Interactions Relate to Nasopharyngeal Carcinoma Susceptibility
Source: PubMed Central journal article supplement (PMC3871583; doi:10.1371/journal.pone.0083034), 2013-12-23
Supplement: pone.0083034.s008.pdf [file pone.0083034.s008.pdf]

**Table S4.** LD analysis of SNPs in interacting region

| Cluster* | Region* | SNP1      | SNP2       | D'    | r <sup>2</sup> |
|----------|---------|-----------|------------|-------|----------------|
| 1        | A       | rs2237353 | rs2237361  | 0.94  | 0.851          |
| 2        | A       | rs6460664 | rs6460671  | 1     | 0.954          |
| 2        | B       | rs2300932 | rs3789311  | 0.966 | 0.904          |
| 6        | A       | rs1591029 | rs1360523  | 1     | 1              |
|          |         | rs1591029 | rs1332173  | 1     | 0.993          |
|          |         | rs1360523 | rs1332173  | 1     | 0.993          |
| 6        | B       | rs899305  | rs2127065  | 1     | 0.946          |
| 8        | A       | rs1341095 | rs6545648  | 1     | 0.993          |
|          |         | rs1341095 | rs7589636  | 0.958 | 0.761          |
|          |         | rs6545648 | rs7589636  | 0.966 | 0.768          |
| 8        | B       | rs7566185 | rs730402   | 1     | 0.993          |
|          |         | rs7566185 | rs6545760  | 0.948 | 0.862          |
|          |         | rs730402  | rs6545760  | 0.956 | 0.869          |
| 11       | A       | rs9403288 | rs9399364  | 1     | 1              |
| 12       | A       | rs6539598 | rs10862397 | 1     | 0.992          |
| 12       | B       | rs7208838 | rs7210733  | 0.989 | 0.948          |
| 13       | A       | rs37181   | rs712572   | 1     | 0.993          |
| 13       | B       | rs560083  | rs512064   | 1     | 0.909          |
| 20       | A       | rs4728351 | rs757359   | 1     | 0.992          |
| 29       | B       | rs928250  | rs2824444  | 0.992 | 0.907          |
|          |         | rs928250  | rs2824447  | 0.992 | 0.907          |
|          |         | rs2824444 | rs2824447  | 1     | 1              |
| 32       | A       | rs1247703 | rs1247881  | 0.806 | 0.64           |
| 37       | A       | rs2523864 | rs2523849  | 0.965 | 0.886          |
| 37       | B       | rs6114101 | rs6048810  | 1     | 1              |
| 38       | A       | rs2523864 | rs2523849  | 0.965 | 0.886          |
| 38       | B       | rs9380215 | rs4947296  | 1     | 0.99           |
|          |         | rs4947296 | rs2233984  | 1     | 0.99           |
|          |         | rs9380215 | rs2233984  | 0.99  | 0.981          |
| 39       | A       | rs879882  | rs7761965  | 0.373 | 0.108          |
| 39       | B       | rs2596501 | rs7770216  | 0.218 | 0.02           |

\*Cluster and Region annotated in Supplementary Table S2
