# Supplementary material for: How Genome-Wide SNP-SNP Interactions Relate to Nasopharyngeal Carcinoma Susceptibility
Source: PubMed Central journal article supplement (PMC3871583; doi:10.1371/journal.pone.0083034), 2013-12-23
Supplement: pone.0083034.s009.pdf [file pone.0083034.s009.pdf]

**Supplementary Table S5.** Haplotype analysis of the interaction regions located in the MHC region

| Haplotype                                         | Haplotype frequency <sup>a</sup> |         |      |                            | Global association <i>p</i> -value |          |          |
|---------------------------------------------------|----------------------------------|---------|------|----------------------------|------------------------------------|----------|----------|
|                                                   | Pooled                           | Control | Case | OR (95% c.i.) <sup>a</sup> | Stage 1                            | Stage 2  | Combined |
| <b>Zone 1</b>                                     |                                  |         |      |                            |                                    |          |          |
| rs2523864 rs2523849 rs9380215 rs4947296 rs2233984 |                                  |         |      |                            |                                    |          |          |
| A A G A G                                         | 0.02                             | 0.02    | 0.01 | 0.69 (0.32,1.45)           |                                    |          |          |
| A G A G A                                         | 0.06                             | 0.08    | 0.04 | 0.56 (0.34,0.93)           |                                    |          |          |
| A G G A G                                         | 0.22                             | 0.18    | 0.26 | 1.95 (1.49,2.54)           |                                    |          |          |
| G A A G A                                         | 0.20                             | 0.14    | 0.25 | 2.34 (2.34,3.09)           |                                    |          |          |
| G A G A G                                         | 0.49                             | 0.56    | 0.43 | 1.00                       |                                    |          |          |
| Rare                                              | 0.01                             | 0.01    | 0.01 | 0.55 (0.12,2.48)           |                                    |          |          |
| Global association <i>p</i> -value                |                                  |         |      |                            | 1.03E-06                           | 5.81E-04 | 8.35E-10 |
| <b>Zone 2</b>                                     |                                  |         |      |                            |                                    |          |          |
| rs879882 rs7761965 rs2596501 rs7770216            |                                  |         |      |                            |                                    |          |          |
| A A A A                                           | 0.04                             | 0.05    | 0.03 | 0.39 (0.21,0.73)           |                                    |          |          |
| A A A C                                           | 0.04                             | 0.05    | 0.03 | 0.45 (0.24,0.82)           |                                    |          |          |
| A G A A                                           | 0.03                             | 0.04    | 0.03 | 0.77 (0.39,1.53)           |                                    |          |          |
| A G G A                                           | 0.07                             | 0.08    | 0.06 | 0.53 (0.33,0.86)           |                                    |          |          |
| A G G C                                           | 0.17                             | 0.16    | 0.18 | 0.80 (0.56,1.14)           |                                    |          |          |
| G A A A                                           | 0.02                             | 0.02    | 0.02 | 0.70 (0.27,1.80)           |                                    |          |          |
| G A A C                                           | 0.06                             | 0.08    | 0.04 | 0.43 (0.25,0.73)           |                                    |          |          |
| G A G A                                           | 0.17                             | 0.13    | 0.21 | 1.18 (0.84,1.65)           |                                    |          |          |
| G A G C                                           | 0.03                             | 0.02    | 0.03 | 0.94 (0.43,2.07)           |                                    |          |          |
| G G A C                                           | 0.02                             | 0.02    | 0.01 | 0.38 (0.11,1.33)           |                                    |          |          |
| G G G A                                           | 0.03                             | 0.03    | 0.03 | 0.59 (0.30,1.16)           |                                    |          |          |
| G G G C                                           | 0.10                             | 0.14    | 0.07 | 0.39 (0.25,0.61)           |                                    |          |          |
| A G A C                                           | 0.20                             | 0.16    | 0.23 | 1.00                       |                                    |          |          |
| Rare                                              | 0.01                             | 0.01    | 0.01 | 0.70 (0.22,2.22)           |                                    |          |          |
| Global association <i>p</i> -value                |                                  |         |      |                            | 1.40E-04                           | 5.77E-02 | 2.00E-06 |

<sup>a</sup>Calculated using Combined dataset.
