# Supplementary material for: How Genome-Wide SNP-SNP Interactions Relate to Nasopharyngeal Carcinoma Susceptibility
Source: PubMed Central journal article supplement (PMC3871583; doi:10.1371/journal.pone.0083034), 2013-12-23
Supplement: pone.0083034.s010.pdf [file pone.0083034.s010.pdf]

Supplementary Table S6. Interaction P values of the SNPs identified in previous GWAS studies

| SNP1      |      |          |              |               | SNP2         |            |      |           |              | Interaction p-value |          |          |          |
|-----------|------|----------|--------------|---------------|--------------|------------|------|-----------|--------------|---------------------|----------|----------|----------|
| SNP       | Chr. | Position | Nearest Gene | Taiwan GWAS P | China GWAS P | SNP        | Chr. | Position  | Nearest Gene | GWAS P              | Stage 1  | Stage 2  | Combined |
| rs29232   | 6    | 29719410 | GABBR1       | 7.53E-09      | 3.90E-18     | rs33790    | 3    | 45271744  | N/A          | 7.59E-02            | 8.92E-05 | 6.39E-01 | 6.38E-03 |
| rs29232   | 6    | 29719410 | GABBR1       | 7.53E-09      | 3.90E-18     | rs12706933 | 7    | 129895384 | MESTIT1      | 9.95E-01            | 2.73E-05 | 3.70E-01 | 2.11E-04 |
| rs29232   | 6    | 29719410 | GABBR1       | 7.53E-09      | 3.90E-18     | rs1512406  | 8    | 139368347 | FAM135B      | 7.77E-01            | 1.37E-06 | 8.76E-01 | 7.85E-05 |
| rs29232   | 6    | 29719410 | GABBR1       | 7.53E-09      | 3.90E-18     | rs4838313  | 9    | 127832779 | N/A          | 5.71E-01            | 4.31E-05 | 2.22E-01 | 1.89E-04 |
| rs29232   | 6    | 29719410 | GABBR1       | 7.53E-09      | 3.90E-18     | rs10217721 | 9    | 127850667 | N/A          | 7.02E-02            | 8.75E-05 | 8.02E-01 | 7.72E-03 |
| rs29232   | 6    | 29719410 | GABBR1       | 7.53E-09      | 3.90E-18     | rs7496968  | 15   | 25984569  | OCA2         | 6.76E-01            | 4.42E-05 | 7.57E-01 | 2.39E-03 |
| rs29232   | 6    | 29719410 | GABBR1       | 7.53E-09      | 3.90E-18     | rs1719994  | 15   | 25997365  | OCA2         | 7.80E-01            | 1.36E-05 | 8.81E-01 | 3.03E-04 |
| rs29232   | 6    | 29719410 | GABBR1       | 7.53E-09      | 3.90E-18     | rs12596786 | 16   | 83261468  | KLHL36       | 7.29E-01            | 9.08E-05 | 4.47E-02 | 5.80E-06 |
| rs29232   | 6    | 29719410 | GABBR1       | 7.53E-09      | 3.90E-18     | rs16944618 | 16   | 83281757  | USP10        | 5.26E-01            | 2.20E-05 | 7.62E-01 | 1.25E-05 |
| rs29232   | 6    | 29719410 | GABBR1       | 7.53E-09      | 3.90E-18     | rs7217478  | 17   | 9548288   | USP43        | 8.35E-01            | 1.10E-05 | 5.06E-01 | 1.46E-04 |
| rs29232   | 6    | 29719410 | GABBR1       | 7.53E-09      | 3.90E-18     | rs873870   | 19   | 19599554  | PBX4         | 4.07E-01            | 9.48E-05 | 8.50E-01 | 1.80E-03 |
| rs29232   | 6    | 29719410 | GABBR1       | 7.53E-09      | 3.90E-18     | rs3891632  | 20   | 12302280  | N/A          | 2.65E-01            | 4.02E-05 | 8.54E-01 | 3.35E-03 |
| rs29232   | 6    | 29719410 | GABBR1       | 7.53E-09      | 3.90E-18     | rs6082457  | 20   | 21504715  | N/A          | 6.38E-01            | 6.78E-05 | 8.81E-01 | 2.38E-03 |
| rs29232   | 6    | 29719410 | GABBR1       | 7.53E-09      | 3.90E-18     | rs2839557  | 21   | 42863867  | SLC37A1      | 6.47E-01            | 3.38E-06 | 1.13E-01 | 1.63E-02 |
| rs29232   | 6    | 29719410 | GABBR1       | 7.53E-09      | 3.90E-18     | rs451954   | 21   | 42869023  | SLC37A1      | 5.92E-01            | 7.76E-06 | 1.55E-01 | 1.72E-02 |
| rs29232   | 6    | 29719410 | GABBR1       | 7.53E-09      | 3.90E-18     | rs401074   | 21   | 42886560  | SLC37A1      | 9.93E-01            | 1.90E-05 | 1.80E-01 | 1.51E-02 |
| rs29232   | 6    | 29719410 | GABBR1       | 7.53E-09      | 3.90E-18     | rs401809   | 21   | 42891021  | SLC37A1      | 8.20E-01            | 3.01E-05 | 1.31E-01 | 3.76E-02 |
| rs29232   | 6    | 29719410 | GABBR1       | 7.53E-09      | 3.90E-18     | rs433632   | 21   | 42893492  | SLC37A1      | 8.18E-01            | 7.98E-05 | 1.05E-01 | 6.66E-02 |
| rs2517713 | 6    | 30026078 | HLA-A        | 9.02E-09      | N/A          | rs3122126  | 1    | 100500726 | DBT          | 6.57E-01            | 8.77E-05 | N/A      | N/A      |
| rs2517713 | 6    | 30026078 | HLA-A        | 9.02E-09      | N/A          | rs4579779  | 1    | 100508491 | RTCD1        | 6.57E-01            | 8.77E-05 | N/A      | N/A      |
| rs2517713 | 6    | 30026078 | HLA-A        | 9.02E-09      | N/A          | rs4504908  | 1    | 100517386 | RTCD1        | 6.57E-01            | 8.77E-05 | N/A      | N/A      |
| rs2517713 | 6    | 30026078 | HLA-A        | 9.02E-09      | N/A          | rs7549726  | 1    | 169676139 | N/A          | 8.60E-01            | 5.44E-05 | N/A      | N/A      |
| rs2517713 | 6    | 30026078 | HLA-A        | 9.02E-09      | N/A          | rs2347284  | 2    | 19553715  | N/A          | 7.90E-01            | 8.13E-05 | N/A      | N/A      |
| rs2517713 | 6    | 30026078 | HLA-A        | 9.02E-09      | N/A          | rs4675431  | 2    | 204814338 | N/A          | 4.85E-01            | 9.40E-05 | N/A      | N/A      |
| rs2517713 | 6    | 30026078 | HLA-A        | 9.02E-09      | N/A          | rs12488144 | 3    | 45806446  | SLC6A20      | 1.35E-03            | 4.24E-05 | N/A      | N/A      |
| rs2517713 | 6    | 30026078 | HLA-A        | 9.02E-09      | N/A          | rs12506479 | 4    | 74811025  | IL8          | 4.08E-02            | 9.51E-05 | N/A      | N/A      |
| rs2517713 | 6    | 30026078 | HLA-A        | 9.02E-09      | N/A          | rs6837842  | 4    | 189873238 | N/A          | 7.73E-01            | 5.01E-05 | N/A      | N/A      |
| rs2517713 | 6    | 30026078 | HLA-A        | 9.02E-09      | N/A          | rs2438632  | 5    | 79427949  | SERINC5      | 3.23E-01            | 6.30E-05 | N/A      | N/A      |
| rs2517713 | 6    | 30026078 | HLA-A        | 9.02E-09      | N/A          | rs2882826  | 6    | 67136078  | N/A          | 9.03E-01            | 7.12E-05 | N/A      | N/A      |
| rs2517713 | 6    | 30026078 | HLA-A        | 9.02E-09      | N/A          | rs6905051  | 6    | 141846121 | N/A          | 2.07E-01            | 4.71E-05 | N/A      | N/A      |
| rs2517713 | 6    | 30026078 | HLA-A        | 9.02E-09      | N/A          | rs2982683  | 6    | 152340128 | ESR1         | 7.58E-01            | 9.53E-05 | N/A      | N/A      |
| rs2517713 | 6    | 30026078 | HLA-A        | 9.02E-09      | N/A          | rs726281   | 6    | 152344271 | ESR1         | 9.43E-01            | 5.31E-05 | N/A      | N/A      |
| rs2517713 | 6    | 30026078 | HLA-A        | 9.02E-09      | N/A          | rs17199454 | 8    | 122144107 | N/A          | 2.98E-01            | 3.86E-05 | N/A      | N/A      |
| rs2517713 | 6    | 30026078 | HLA-A        | 9.02E-09      | N/A          | rs520887   | 10   | 78720167  | KCNMA1       | 5.81E-01            | 6.07E-06 | N/A      | N/A      |
| rs2517713 | 6    | 30026078 | HLA-A        | 9.02E-09      | N/A          | rs583507   | 10   | 78735335  | KCNMA1       | 4.79E-01            | 5.67E-06 | N/A      | N/A      |
| rs2517713 | 6    | 30026078 | HLA-A        | 9.02E-09      | N/A          | rs11023194 | 11   | 14326345  | N/A          | 3.99E-01            | 8.41E-05 | N/A      | N/A      |
| rs2517713 | 6    | 30026078 | HLA-A        | 9.02E-09      | N/A          | rs12785600 | 11   | 20043788  | NAV2         | 4.60E-01            | 6.24E-05 | N/A      | N/A      |
| rs2517713 | 6    | 30026078 | HLA-A        | 9.02E-09      | N/A          | rs658976   | 11   | 73775114  | PGM2L1       | 8.19E-01            | 2.80E-05 | N/A      | N/A      |
| rs2517713 | 6    | 30026078 | HLA-A        | 9.02E-09      | N/A          | rs639228   | 11   | 73775613  | PGM2L1       | 7.46E-01            | 8.35E-05 | N/A      | N/A      |
| rs2517713 | 6    | 30026078 | HLA-A        | 9.02E-09      | N/A          | rs639525   | 11   | 73782753  | PGM2L1       | 7.25E-01            | 7.53E-05 | N/A      | N/A      |
| rs2517713 | 6    | 30026078 | HLA-A        | 9.02E-09      | N/A          | rs1351229  | 12   | 13309829  | N/A          | 5.48E-01            | 1.41E-05 | N/A      | N/A      |
| rs2517713 | 6    | 30026078 | HLA-A        | 9.02E-09      | N/A          | rs2061868  | 12   | 13313104  | N/A          | 2.14E-01            | 2.95E-05 | N/A      | N/A      |
| rs2517713 | 6    | 30026078 | HLA-A        | 9.02E-09      | N/A          | rs8059056  | 16   | 76324079  | NUDT7        | 9.61E-01            | 3.73E-05 | N/A      | N/A      |
| rs2517713 | 6    | 30026078 | HLA-A        | 9.02E-09      | N/A          | rs16946398 | 16   | 76324992  | NUDT7        | 9.61E-01            | 3.73E-05 | N/A      | N/A      |
| rs2517713 | 6    | 30026078 | HLA-A        | 9.02E-09      | N/A          | rs4496199  | 17   | 13743140  | N/A          | 5.59E-01            | 8.77E-05 | N/A      | N/A      |
| rs2517713 | 6    | 30026078 | HLA-A        | 9.02E-09      | N/A          | rs2364890  | 18   | 65595729  | DOK6         | 6.97E-01            | 2.84E-05 | N/A      | N/A      |
| rs2517713 | 6    | 30026078 | HLA-A        | 9.02E-09      | N/A          | rs6137384  | 20   | 21473800  | N/A          | 5.00E-01            | 2.17E-05 | N/A      | N/A      |
| rs2517713 | 6    | 30026078 | HLA-A        | 9.02E-09      | N/A          | rs6035881  | 20   | 21475128  | N/A          | 5.02E-01            | 1.19E-05 | N/A      | N/A      |
| rs2517713 | 6    | 30026078 | HLA-A        | 9.02E-09      | N/A          | rs4813430  | 20   | 21484958  | N/A          | 7.11E-01            | 2.71E-05 | N/A      | N/A      |
| rs2975042 | 6    | 30028515 | HLA-A        | 9.15E-09      | N/A          | rs3122126  | 1    | 100500726 | DBT          | 6.57E-01            | 7.62E-05 | N/A      | N/A      |
| rs2975042 | 6    | 30028515 | HLA-A        | 9.15E-09      | N/A          | rs4579779  | 1    | 100508491 | RTCD1        | 6.57E-01            | 7.62E-05 | N/A      | N/A      |
| rs2975042 | 6    | 30028515 | HLA-A        | 9.15E-09      | N/A          | rs4504908  | 1    | 100517386 | RTCD1        | 6.57E-01            | 7.62E-05 | N/A      | N/A      |
| rs2975042 | 6    | 30028515 | HLA-A        | 9.15E-09      | N/A          | rs7549726  | 1    | 169676139 | N/A          | 8.60E-01            | 3.04E-05 | N/A      | N/A      |
| rs2975042 | 6    | 30028515 | HLA-A        | 9.15E-09      | N/A          | rs12488144 | 3    | 45806446  | SLC6A20      | 1.35E-03            | 3.30E-05 | N/A      | N/A      |
| rs2975042 | 6    | 30028515 | HLA-A        | 9.15E-09      | N/A          | rs2346649  | 4    | 63584319  | N/A          | 2.61E-01            | 7.96E-05 | N/A      | N/A      |
| rs2975042 | 6    | 30028515 | HLA-A        | 9.15E-09      | N/A          | rs6837842  | 4    | 189873238 | N/A          | 7.73E-01            | 7.33E-05 | N/A      | N/A      |
| rs2975042 | 6    | 30028515 | HLA-A        | 9.15E-09      | N/A          | rs2438632  | 5    | 79427949  | SERINC5      | 3.23E-01            | 5.54E-05 | N/A      | N/A      |
| rs2975042 | 6    | 30028515 | HLA-A        | 9.15E-09      | N/A          | rs2882826  | 6    | 67136078  | N/A          | 9.03E-01            | 8.15E-05 | N/A      | N/A      |
| rs2975042 | 6    | 30028515 | HLA-A        | 9.15E-09      | N/A          | rs6905051  | 6    | 141846121 | N/A          | 2.07E-01            | 3.77E-05 | N/A      | N/A      |
| rs2975042 | 6    | 30028515 | HLA-A        | 9.15E-09      | N/A          | rs2982683  | 6    | 152340128 | ESR1         | 7.58E-01            | 9.19E-05 | N/A      | N/A      |
| rs2975042 | 6    | 30028515 | HLA-A        | 9.15E-09      | N/A          | rs726281   | 6    | 152344271 | ESR1         | 9.43E-01            | 4.07E-05 | N/A      | N/A      |
| rs2975042 | 6    | 30028515 | HLA-A        | 9.15E-09      | N/A          | rs17199454 | 8    | 122144107 | N/A          | 2.98E-01            | 3.29E-05 | N/A      | N/A      |
| rs2975042 | 6    | 30028515 | HLA-A        | 9.15E-09      | N/A          | rs520887   | 10   | 78720167  | KCNMA1       | 5.81E-01            | 9.71E-06 | N/A      | N/A      |
| rs2975042 | 6    | 30028515 | HLA-A        | 9.15E-09      | N/A          | rs583507   | 10   | 78735335  | KCNMA1       | 4.79E-01            | 9.10E-06 | N/A      | N/A      |
| rs2975042 | 6    | 30028515 | HLA-A        | 9.15E-09      | N/A          | rs12785600 | 11   | 20043788  | NAV2         | 4.60E-01            | 8.11E-05 | N/A      | N/A      |
| rs2975042 | 6    | 30028515 | HLA-A        | 9.15E-09      | N/A          | rs658976   | 11   | 73775114  | PGM2L1       | 8.19E-01            | 1.98E-05 | N/A      | N/A      |
| rs2975042 | 6    | 30028515 | HLA-A        | 9.15E-09      | N/A          | rs639228   | 11   | 73775613  | PGM2L1       | 7.46E-01            | 6.09E-05 | N/A      | N/A      |
| rs2975042 | 6    | 30028515 | HLA-A        | 9.15E-09      | N/A          | rs639525   | 11   | 73782753  | PGM2L1       | 7.25E-01            | 5.49E-05 | N/A      | N/A      |
| rs2975042 | 6    | 30028515 | HLA-A        | 9.15E-09      | N/A          | rs1351229  | 12   | 13309829  | N/A          | 5.48E-01            | 2.80E-05 | N/A      | N/A      |
| rs2975042 | 6    | 30028515 | HLA-A        | 9.15E-09      | N/A          | rs2061868  | 12   | 13313104  | N/A          | 2.14E-01            | 5.85E-05 | N/A      | N/A      |
| rs2975042 | 6    | 30028515 | HLA-A        | 9.15E-09      | N/A          | rs8059056  | 16   | 76324079  | NUDT7        | 9.61E-01            | 2.82E-05 | N/A      | N/A      |
| rs2975042 | 6    | 30028515 | HLA-A        | 9.15E-09      | N/A          | rs16946398 | 16   | 76324992  | NUDT7        | 9.61E-01            | 2.82E-05 | N/A      | N/A      |
| rs2975042 | 6    | 30028515 | HLA-A        | 9.15E-09      | N/A          | rs2364890  | 18   | 65595729  | DOK6         | 6.97E-01            | 4.18E-05 | N/A      | N/A      |
| rs2975042 | 6    | 30028515 | HLA-A        | 9.15E-09      | N/A          | rs6137384  | 20   | 21473800  | N/A          | 5.00E-01            | 8.73E-06 | N/A      | N/A      |
| rs2975042 | 6    | 30028515 | HLA-A        | 9.15E-09      | N/A          | rs6035881  | 20   | 21475128  | N/A          | 5.02E-01            | 4.71E-06 | N/A      | N/A      |
| rs2975042 | 6    | 30028515 | HLA-A        | 9.15E-09      | N/A          | rs4813430  | 20   | 21484958  | N/A          | 7.11E-01            | 1.10E-05 | N/A      | N/A      |
| rs2860580 | 6    | 30014670 | HLA-A        | 1.20E-08      | 1.34E-28     | rs3122126  | 1    | 100500726 | DBT          | 6.57E-01            | 7.67E-05 | 7.46E-01 | 1.06E-03 |
| rs2860580 | 6    | 30014670 | HLA-A        | 1.20E-08      | 1.34E-28     | rs4579779  | 1    | 100508491 | RTCD1        | 6.57E-01            | 7.67E-05 | 7.46E-01 | 1.06E-03 |
| rs2860580 | 6    | 30014670 | HLA-A        | 1.20E-08      | 1.34E-28     | rs4504908  | 1    | 100517386 | RTCD1        | 6.57E-01            | 7.67E-05 | 7.46E-01 | 1.06E-03 |
| rs2860580 | 6    | 30014670 | HLA-A        | 1.20E-08      | 1.34E-28     | rs10801954 | 1    | 117611372 | N/A          | 5.94E-01            | 9.76E-05 | 4.48E-02 | 2.06E-01 |
| rs2860580 | 6    | 30014670 | HLA-A        | 1.20E-08      | 1.34E-28     | rs7549726  | 1    | 169676139 | N/A          | 8.60E-01            | 6.69E-05 | 7.17E-01 | 3.02E-03 |
| rs2860580 | 6    | 30014670 | HLA-A        | 1.20E-08      | 1.           |            |      |           |              |                     |          |          |          |

| SNP1      |      |          |              |               | SNP2         |            |      |           |              | Interaction p-value |          |          |          |
|-----------|------|----------|--------------|---------------|--------------|------------|------|-----------|--------------|---------------------|----------|----------|----------|
| SNP       | Chr. | Position | Nearest Gene | Taiwan GWAS P | China GWAS P | SNP        | Chr. | Position  | Nearest Gene | GWAS P              | Stage 1  | Stage 2  | Combined |
| rs2860580 | 6    | 30014670 | HLA-A        | 1.20E-08      | 1.34E-28     | rs12488144 | 3    | 45806446  | SLC6A20      | 1.35E-03            | 4.96E-05 | 1.88E-01 | 2.05E-02 |
| rs2860580 | 6    | 30014670 | HLA-A        | 1.20E-08      | 1.34E-28     | rs6837842  | 4    | 189873238 | N/A          | 7.73E-01            | 5.38E-05 | 8.06E-01 | 8.79E-03 |
| rs2860580 | 6    | 30014670 | HLA-A        | 1.20E-08      | 1.34E-28     | rs2438632  | 5    | 79427949  | SERINC5      | 3.23E-01            | 6.67E-05 | 7.69E-01 | 6.15E-03 |
| rs2860580 | 6    | 30014670 | HLA-A        | 1.20E-08      | 1.34E-28     | rs4236134  | 6    | 55551311  | HMGCLL1      | 9.32E-01            | 9.39E-05 | 7.56E-01 | 5.24E-03 |
| rs2860580 | 6    | 30014670 | HLA-A        | 1.20E-08      | 1.34E-28     | rs9367646  | 6    | 55574331  | N/A          | 9.31E-01            | 8.80E-05 | 7.17E-01 | 5.53E-03 |
| rs2860580 | 6    | 30014670 | HLA-A        | 1.20E-08      | 1.34E-28     | rs2882826  | 6    | 67136078  | N/A          | 9.03E-01            | 9.92E-05 | 5.46E-01 | 1.11E-02 |
| rs2860580 | 6    | 30014670 | HLA-A        | 1.20E-08      | 1.34E-28     | rs6905051  | 6    | 141846121 | N/A          | 2.07E-01            | 4.33E-05 | 3.26E-01 | 3.85E-04 |
| rs2860580 | 6    | 30014670 | HLA-A        | 1.20E-08      | 1.34E-28     | rs2982683  | 6    | 152340128 | ESR1         | 7.58E-01            | 7.59E-05 | 3.31E-01 | 1.19E-02 |
| rs2860580 | 6    | 30014670 | HLA-A        | 1.20E-08      | 1.34E-28     | rs726281   | 6    | 152344271 | ESR1         | 9.43E-01            | 5.21E-05 | 4.63E-01 | 4.89E-03 |
| rs2860580 | 6    | 30014670 | HLA-A        | 1.20E-08      | 1.34E-28     | rs17199454 | 8    | 122144107 | N/A          | 2.98E-01            | 4.29E-05 | 6.30E-01 | 3.15E-04 |
| rs2860580 | 6    | 30014670 | HLA-A        | 1.20E-08      | 1.34E-28     | rs520887   | 10   | 78720167  | KCNMA1       | 5.81E-01            | 8.74E-06 | 3.18E-01 | 2.68E-03 |
| rs2860580 | 6    | 30014670 | HLA-A        | 1.20E-08      | 1.34E-28     | rs583507   | 10   | 78735335  | KCNMA1       | 4.79E-01            | 8.23E-06 | 3.18E-01 | 2.69E-03 |
| rs2860580 | 6    | 30014670 | HLA-A        | 1.20E-08      | 1.34E-28     | rs11023194 | 11   | 14326345  | N/A          | 3.99E-01            | 7.82E-05 | 6.43E-01 | 1.87E-02 |
| rs2860580 | 6    | 30014670 | HLA-A        | 1.20E-08      | 1.34E-28     | rs12785600 | 11   | 20043788  | NAV2         | 4.60E-01            | 6.24E-05 | 6.22E-01 | 4.13E-04 |
| rs2860580 | 6    | 30014670 | HLA-A        | 1.20E-08      | 1.34E-28     | rs658976   | 11   | 73775114  | PGM2L1       | 8.19E-01            | 3.54E-05 | 2.00E-01 | 5.99E-02 |
| rs2860580 | 6    | 30014670 | HLA-A        | 1.20E-08      | 1.34E-28     | rs639525   | 11   | 73782753  | PGM2L1       | 7.25E-01            | 9.46E-05 | 2.68E-01 | 6.70E-02 |
| rs2860580 | 6    | 30014670 | HLA-A        | 1.20E-08      | 1.34E-28     | rs1351229  | 12   | 13309829  | N/A          | 5.48E-01            | 1.66E-05 | 9.99E-01 | 7.12E-04 |
| rs2860580 | 6    | 30014670 | HLA-A        | 1.20E-08      | 1.34E-28     | rs2061868  | 12   | 13313104  | N/A          | 2.14E-01            | 3.71E-05 | 6.28E-01 | 3.97E-03 |
| rs2860580 | 6    | 30014670 | HLA-A        | 1.20E-08      | 1.34E-28     | rs8059056  | 16   | 76324079  | NUDT7        | 9.61E-01            | 4.44E-05 | 2.92E-01 | 1.64E-04 |
| rs2860580 | 6    | 30014670 | HLA-A        | 1.20E-08      | 1.34E-28     | rs16946398 | 16   | 76324992  | NUDT7        | 9.61E-01            | 4.44E-05 | 2.92E-01 | 1.64E-04 |
| rs2860580 | 6    | 30014670 | HLA-A        | 1.20E-08      | 1.34E-28     | rs4496199  | 17   | 13743140  | N/A          | 5.59E-01            | 8.57E-05 | 6.56E-01 | 3.88E-03 |
| rs2860580 | 6    | 30014670 | HLA-A        | 1.20E-08      | 1.34E-28     | rs2364890  | 18   | 65595729  | DOK6         | 6.97E-01            | 2.46E-05 | 4.93E-01 | 2.53E-04 |
| rs2860580 | 6    | 30014670 | HLA-A        | 1.20E-08      | 1.34E-28     | rs6137384  | 20   | 21473800  | N/A          | 5.00E-01            | 2.09E-05 | 4.81E-01 | 7.36E-03 |
| rs2860580 | 6    | 30014670 | HLA-A        | 1.20E-08      | 1.34E-28     | rs6035881  | 20   | 21475128  | N/A          | 5.02E-01            | 1.14E-05 | 5.41E-01 | 4.27E-03 |
| rs2860580 | 6    | 30014670 | HLA-A        | 1.20E-08      | 1.34E-28     | rs4813430  | 20   | 21484958  | N/A          | 7.11E-01            | 2.60E-05 | N/A      | N/A      |
| rs9260734 | 6    | 30040645 | HCG9         | 7.70E-08      | 9.80E-22     | rs3122126  | 1    | 100500726 | DBT          | 6.57E-01            | 3.48E-05 | 9.20E-01 | 1.62E-03 |
| rs9260734 | 6    | 30040645 | HCG9         | 7.70E-08      | 9.80E-22     | rs4579779  | 1    | 100508491 | RTCD1        | 6.57E-01            | 3.48E-05 | 9.20E-01 | 1.62E-03 |
| rs9260734 | 6    | 30040645 | HCG9         | 7.70E-08      | 9.80E-22     | rs4504908  | 1    | 100517386 | RTCD1        | 6.57E-01            | 3.48E-05 | 9.20E-01 | 1.62E-03 |
| rs9260734 | 6    | 30040645 | HCG9         | 7.70E-08      | 9.80E-22     | rs17019005 | 2    | 4329744   | N/A          | 5.43E-02            | 6.56E-05 | 1.20E-01 | 2.59E-02 |
| rs9260734 | 6    | 30040645 | HCG9         | 7.70E-08      | 9.80E-22     | rs2278581  | 2    | 42874418  | HAO          | 9.88E-01            | 9.15E-05 | 3.24E-02 | 8.15E-02 |
| rs9260734 | 6    | 30040645 | HCG9         | 7.70E-08      | 9.80E-22     | rs2937715  | 5    | 75603809  | SV2C         | 9.78E-01            | 6.40E-05 | 4.24E-01 | 1.03E-03 |
| rs9260734 | 6    | 30040645 | HCG9         | 7.70E-08      | 9.80E-22     | rs2438632  | 5    | 79427949  | SERINC5      | 3.23E-01            | 2.73E-05 | 2.85E-01 | 1.54E-02 |
| rs9260734 | 6    | 30040645 | HCG9         | 7.70E-08      | 9.80E-22     | rs6905051  | 6    | 141846121 | N/A          | 2.07E-01            | 2.55E-05 | 6.45E-01 | 1.08E-03 |
| rs9260734 | 6    | 30040645 | HCG9         | 7.70E-08      | 9.80E-22     | rs9376628  | 6    | 141902024 | N/A          | 1.46E-01            | 3.64E-05 | 7.98E-01 | 1.43E-03 |
| rs9260734 | 6    | 30040645 | HCG9         | 7.70E-08      | 9.80E-22     | rs11757988 | 6    | 141928389 | N/A          | 3.00E-01            | 2.29E-05 | 5.53E-01 | 8.00E-04 |
| rs9260734 | 6    | 30040645 | HCG9         | 7.70E-08      | 9.80E-22     | rs38819    | 7    | 117495983 | N/A          | 5.28E-01            | 9.97E-05 | N/A      | N/A      |
| rs9260734 | 6    | 30040645 | HCG9         | 7.70E-08      | 9.80E-22     | rs17199454 | 8    | 122144107 | N/A          | 2.98E-01            | 1.79E-05 | 9.54E-01 | 4.23E-04 |
| rs9260734 | 6    | 30040645 | HCG9         | 7.70E-08      | 9.80E-22     | rs7864480  | 9    | 4049101   | GLIS3        | 4.15E-01            | 6.60E-05 | 2.04E-01 | 2.75E-04 |
| rs9260734 | 6    | 30040645 | HCG9         | 7.70E-08      | 9.80E-22     | rs2601735  | 10   | 14867137  | FAM107B      | 2.41E-01            | 7.51E-05 | 1.11E-01 | 8.77E-05 |
| rs9260734 | 6    | 30040645 | HCG9         | 7.70E-08      | 9.80E-22     | rs520887   | 10   | 78720167  | KCNMA1       | 5.81E-01            | 8.83E-06 | 9.90E-02 | 9.11E-03 |
| rs9260734 | 6    | 30040645 | HCG9         | 7.70E-08      | 9.80E-22     | rs583507   | 10   | 78735335  | KCNMA1       | 4.79E-01            | 7.74E-06 | 9.90E-02 | 8.91E-03 |
| rs9260734 | 6    | 30040645 | HCG9         | 7.70E-08      | 9.80E-22     | rs10824534 | 10   | 78807844  | KCNMA1       | 3.30E-01            | 8.16E-05 | 1.30E-01 | 3.26E-02 |
| rs9260734 | 6    | 30040645 | HCG9         | 7.70E-08      | 9.80E-22     | rs1371457  | 10   | 78817839  | KCNMA1       | 6.18E-01            | 4.42E-05 | 1.50E-01 | 1.99E-02 |
| rs9260734 | 6    | 30040645 | HCG9         | 7.70E-08      | 9.80E-22     | rs12785600 | 11   | 20043788  | NAV2         | 4.60E-01            | 5.72E-06 | 8.37E-01 | 1.39E-04 |
| rs9260734 | 6    | 30040645 | HCG9         | 7.70E-08      | 9.80E-22     | rs1351229  | 12   | 13309829  | N/A          | 5.48E-01            | 2.98E-05 | 5.62E-01 | 3.85E-04 |
| rs9260734 | 6    | 30040645 | HCG9         | 7.70E-08      | 9.80E-22     | rs2061868  | 12   | 13313104  | N/A          | 2.14E-01            | 3.65E-05 | 8.06E-01 | 2.62E-03 |
| rs9260734 | 6    | 30040645 | HCG9         | 7.70E-08      | 9.80E-22     | rs932539   | 14   | 58614370  | N/A          | 3.62E-01            | 5.16E-05 | 3.87E-01 | 4.50E-04 |
| rs9260734 | 6    | 30040645 | HCG9         | 7.70E-08      | 9.80E-22     | rs11630247 | 15   | 23649253  | ATP10A       | 4.36E-01            | 5.87E-05 | 2.58E-01 | 2.00E-02 |
| rs9260734 | 6    | 30040645 | HCG9         | 7.70E-08      | 9.80E-22     | rs2053463  | 16   | 27205537  | NSMCE1       | 1.89E-01            | 9.91E-05 | 9.57E-01 | 5.55E-03 |
| rs9260734 | 6    | 30040645 | HCG9         | 7.70E-08      | 9.80E-22     | rs11081236 | 18   | 6433601   | N/A          | 5.84E-01            | 5.46E-05 | 7.70E-01 | 9.39E-04 |
| rs9260734 | 6    | 30040645 | HCG9         | 7.70E-08      | 9.80E-22     | rs2364890  | 18   | 65595729  | DOK6         | 6.97E-01            | 6.98E-05 | 3.49E-01 | 2.46E-04 |
| rs9260734 | 6    | 30040645 | HCG9         | 7.70E-08      | 9.80E-22     | rs6137384  | 20   | 21473800  | N/A          | 5.00E-01            | 5.20E-05 | 3.35E-01 | 2.07E-02 |
| rs9260734 | 6    | 30040645 | HCG9         | 7.70E-08      | 9.80E-22     | rs6035881  | 20   | 21475128  | N/A          | 5.02E-01            | 2.88E-05 | 3.99E-01 | 1.22E-02 |
| rs9260734 | 6    | 30040645 | HCG9         | 7.70E-08      | 9.80E-22     | rs6082457  | 20   | 21504715  | N/A          | 6.38E-01            | 7.16E-05 | 1.57E-01 | 1.10E-04 |
| rs9260734 | 6    | 30040645 | HCG9         | 7.70E-08      | 9.80E-22     | rs2839397  | 21   | 42159411  | PRDM15       | 9.83E-02            | 8.63E-05 | 3.90E-01 | 8.38E-04 |
| rs3869062 | 6    | 30042870 | HCG9         | 3.06E-07      | 2.90E-20     | rs3122126  | 1    | 100500726 | DBT          | 6.57E-01            | 4.39E-05 | 9.22E-01 | 1.71E-03 |
| rs3869062 | 6    | 30042870 | HCG9         | 3.06E-07      | 2.90E-20     | rs4579779  | 1    | 100508491 | RTCD1        | 6.57E-01            | 4.39E-05 | 9.22E-01 | 1.71E-03 |
| rs3869062 | 6    | 30042870 | HCG9         | 3.06E-07      | 2.90E-20     | rs4504908  | 1    | 100517386 | RTCD1        | 6.57E-01            | 4.39E-05 | 9.22E-01 | 1.71E-03 |
| rs3869062 | 6    | 30042870 | HCG9         | 3.06E-07      | 2.90E-20     | rs7549726  | 1    | 169676139 | N/A          | 8.60E-01            | 7.87E-05 | 4.10E-01 | 8.10E-04 |
| rs3869062 | 6    | 30042870 | HCG9         | 3.06E-07      | 2.90E-20     | rs6733573  | 2    | 204840871 | N/A          | 3.35E-01            | 8.94E-05 | 3.29E-01 | 2.61E-04 |
| rs3869062 | 6    | 30042870 | HCG9         | 3.06E-07      | 2.90E-20     | rs7590649  | 2    | 204842857 | N/A          | 3.35E-01            | 8.94E-05 | 2.60E-01 | 1.84E-04 |
| rs3869062 | 6    | 30042870 | HCG9         | 3.06E-07      | 2.90E-20     | rs2861203  | 3    | 174433247 | N/A          | 6.12E-01            | 8.98E-05 | 6.55E-01 | 2.84E-03 |
| rs3869062 | 6    | 30042870 | HCG9         | 3.06E-07      | 2.90E-20     | rs1981693  | 4    | 16889095  | N/A          | 1.39E-01            | 8.10E-05 | 5.75E-01 | 1.12E-02 |
| rs3869062 | 6    | 30042870 | HCG9         | 3.06E-07      | 2.90E-20     | rs4543093  | 4    | 154323909 | TRIM2        | 6.96E-01            | 9.66E-05 | N/A      | N/A      |
| rs3869062 | 6    | 30042870 | HCG9         | 3.06E-07      | 2.90E-20     | rs2937715  | 5    | 75603809  | SV2C         | 9.78E-01            | 8.18E-05 | 4.15E-01 | 9.09E-04 |
| rs3869062 | 6    | 30042870 | HCG9         | 3.06E-07      | 2.90E-20     | rs2438632  | 5    | 79427949  | SERINC5      | 3.23E-01            | 1.26E-05 | 4.00E-01 | 4.71E-03 |
| rs3869062 | 6    | 30042870 | HCG9         | 3.06E-07      | 2.90E-20     | rs4236134  | 6    | 55551311  | HMGCLL1      | 9.32E-01            | 9.34E-05 | 7.38E-01 | 1.19E-03 |
| rs3869062 | 6    | 30042870 | HCG9         | 3.06E-07      | 2.90E-20     | rs9367646  | 6    | 55574331  | N/A          | 9.31E-01            | 8.71E-05 | 7.71E-01 | 1.23E-03 |
| rs3869062 | 6    | 30042870 | HCG9         | 3.06E-07      | 2.90E-20     | rs2882826  | 6    | 67136078  | N/A          | 9.03E-01            | 8.91E-05 | 9.71E-01 | 3.85E-03 |
| rs3869062 | 6    | 30042870 | HCG9         | 3.06E-07      | 2.90E-20     | rs6905051  | 6    | 141846121 | N/A          | 2.07E-01            | 1.87E-05 | 7.57E-01 | 1.03E-03 |
| rs3869062 | 6    | 30042870 | HCG9         | 3.06E-07      | 2.90E-20     | rs9376628  | 6    | 141902024 | N/A          | 1.46E-01            | 2.33E-05 | 7.83E-01 | 1.05E-03 |
| rs3869062 | 6    | 30042870 | HCG9         | 3.06E-07      | 2.90E-20     | rs11757988 | 6    | 141928389 | N/A          | 3.00E-01            | 2.89E-05 | 5.37E-01 | 7.59E-04 |
| rs3869062 | 6    | 30042870 | HCG9         | 3.06E-07      | 2.90E-20     | rs12536735 | 7    | 142875457 | N/A          | 6.29E-01            | 3.51E-05 | 9.19E-01 | 1.34E-03 |
| rs3869062 | 6    | 30042870 | HCG9         | 3.06E-07      | 2.90E-20     | rs1525108  | 7    | 142898876 | N/A          | 4.25E-01            | 9.93E-05 | 6.84E-01 | 1.39E-03 |
| rs3869062 | 6    | 30042870 | HCG9         | 3.06E-07      | 2.90E-20     | rs17199454 | 8    | 122144107 | N/A          | 2.98E-01            | 5.76E    |          |          |

| SNP1       |      |          |              |               | SNP2         |            |      |           |              | Interaction p-value |          |          |          |
|------------|------|----------|--------------|---------------|--------------|------------|------|-----------|--------------|---------------------|----------|----------|----------|
| SNP        | Chr. | Position | Nearest Gene | Taiwan GWAS P | China GWAS P | SNP        | Chr. | Position  | Nearest Gene | GWAS P              | Stage 1  | Stage 2  | Combined |
| rs3869062  | 6    | 30042870 | HCG9         | 3.06E-07      | 2.90E-20     | rs6035881  | 20   | 21475128  | N/A          | 5.02E-01            | 5.76E-06 | 2.74E-01 | 9.02E-03 |
| rs3869062  | 6    | 30042870 | HCG9         | 3.06E-07      | 2.90E-20     | rs4813430  | 20   | 21484958  | N/A          | 7.11E-01            | 2.26E-05 | N/A      | N/A      |
| rs3869062  | 6    | 30042870 | HCG9         | 3.06E-07      | 2.90E-20     | rs6082457  | 20   | 21504715  | N/A          | 6.38E-01            | 3.49E-05 | 1.52E-01 | 4.52E-05 |
| rs16896923 | 6    | 30108666 | NCRNA00171   | 3.11E-06      | 4.20E-11     | rs4912018  | 1    | 19890308  | TMCO4        | 2.19E-01            | 8.29E-05 | N/A      | N/A      |
| rs16896923 | 6    | 30108666 | NCRNA00171   | 3.11E-06      | 4.20E-11     | rs10917518 | 1    | 19890325  | TMCO4        | 4.95E-01            | 2.89E-05 | N/A      | N/A      |
| rs16896923 | 6    | 30108666 | NCRNA00171   | 3.11E-06      | 4.20E-11     | rs1858409  | 2    | 2430444   | N/A          | 2.89E-02            | 8.19E-05 | N/A      | N/A      |
| rs16896923 | 6    | 30108666 | NCRNA00171   | 3.11E-06      | 4.20E-11     | rs889248   | 5    | 63940824  | RGS7BP       | 4.84E-01            | 3.67E-05 | N/A      | N/A      |
| rs16896923 | 6    | 30108666 | NCRNA00171   | 3.11E-06      | 4.20E-11     | rs918604   | 5    | 63949443  | RGS7BP       | 4.76E-01            | 3.62E-05 | N/A      | N/A      |
| rs16896923 | 6    | 30108666 | NCRNA00171   | 3.11E-06      | 4.20E-11     | rs1266831  | 6    | 52205995  | IL17F        | 4.05E-01            | 5.94E-05 | N/A      | N/A      |
| rs16896923 | 6    | 30108666 | NCRNA00171   | 3.11E-06      | 4.20E-11     | rs9655042  | 7    | 4836277   | RADIL        | 4.48E-01            | 4.06E-05 | N/A      | N/A      |
| rs16896923 | 6    | 30108666 | NCRNA00171   | 3.11E-06      | 4.20E-11     | rs1351229  | 12   | 13309829  | N/A          | 5.48E-01            | 1.62E-05 | N/A      | N/A      |
| rs16896923 | 6    | 30108666 | NCRNA00171   | 3.11E-06      | 4.20E-11     | rs2061868  | 12   | 13313104  | N/A          | 2.14E-01            | 7.46E-05 | N/A      | N/A      |
| rs16896923 | 6    | 30108666 | NCRNA00171   | 3.11E-06      | 4.20E-11     | rs1373422  | 12   | 42325914  | N/A          | 8.42E-01            | 7.50E-05 | N/A      | N/A      |
| rs16896923 | 6    | 30108666 | NCRNA00171   | 3.11E-06      | 4.20E-11     | rs11169821 | 12   | 50062992  | GALNT6       | 6.53E-01            | 8.22E-05 | N/A      | N/A      |
| rs16896923 | 6    | 30108666 | NCRNA00171   | 3.11E-06      | 4.20E-11     | rs4913307  | 12   | 65150558  | N/A          | 3.43E-01            | 5.55E-05 | N/A      | N/A      |
| rs16896923 | 6    | 30108666 | NCRNA00171   | 3.11E-06      | 4.20E-11     | rs576810   | 13   | 74822785  | TBC1D4       | 1.41E-02            | 6.20E-05 | N/A      | N/A      |
| rs16896923 | 6    | 30108666 | NCRNA00171   | 3.11E-06      | 4.20E-11     | rs11625845 | 14   | 28334303  | C14orf23     | 9.28E-01            | 4.58E-05 | N/A      | N/A      |
| rs16896923 | 6    | 30108666 | NCRNA00171   | 3.11E-06      | 4.20E-11     | rs8074124  | 17   | 33785091  | SOCS7        | 6.54E-01            | 2.54E-05 | N/A      | N/A      |
| rs16896923 | 6    | 30108666 | NCRNA00171   | 3.11E-06      | 4.20E-11     | rs6089236  | 20   | 59529751  | CDH4         | 8.07E-01            | 9.43E-06 | N/A      | N/A      |
| rs16896923 | 6    | 30108666 | NCRNA00171   | 3.11E-06      | 4.20E-11     | rs1041274  | 20   | 59532539  | CDH4         | 7.30E-01            | 5.66E-05 | N/A      | N/A      |
| rs16896923 | 6    | 30108666 | NCRNA00171   | 3.11E-06      | 4.20E-11     | rs6061612  | 20   | 59540967  | CDH4         | 7.63E-01            | 8.62E-05 | N/A      | N/A      |
| rs16896923 | 6    | 30108666 | NCRNA00171   | 3.11E-06      | 4.20E-11     | rs2834843  | 21   | 35502660  | N/A          | 6.26E-01            | 1.09E-05 | N/A      | N/A      |
| rs16896923 | 6    | 30108666 | NCRNA00171   | 3.11E-06      | 4.20E-11     | rs5752318  | 22   | 25122113  | N/A          | 4.66E-01            | 1.98E-05 | N/A      | N/A      |
| rs5009448  | 6    | 30048467 | HCG9         | 3.96E-06      | 2.00E-18     | rs10917518 | 1    | 19890325  | TMCO4        | 4.95E-01            | 9.60E-05 | N/A      | N/A      |
| rs5009448  | 6    | 30048467 | HCG9         | 3.96E-06      | 2.00E-18     | rs1342738  | 1    | 117590806 | N/A          | 8.65E-01            | 2.30E-05 | 1.77E-01 | 3.04E-02 |
| rs5009448  | 6    | 30048467 | HCG9         | 3.96E-06      | 2.00E-18     | rs11124523 | 2    | 36704768  | N/A          | 6.44E-01            | 6.63E-05 | 5.41E-01 | 5.01E-03 |
| rs5009448  | 6    | 30048467 | HCG9         | 3.96E-06      | 2.00E-18     | rs4569679  | 3    | 87773719  | N/A          | 7.88E-01            | 5.74E-05 | 5.39E-01 | 6.23E-04 |
| rs5009448  | 6    | 30048467 | HCG9         | 3.96E-06      | 2.00E-18     | rs2861203  | 3    | 174433247 | N/A          | 6.12E-01            | 2.55E-05 | 5.60E-01 | 8.46E-04 |
| rs5009448  | 6    | 30048467 | HCG9         | 3.96E-06      | 2.00E-18     | rs1497431  | 4    | 67897598  | N/A          | 8.71E-01            | 4.11E-05 | 8.99E-01 | 6.63E-04 |
| rs5009448  | 6    | 30048467 | HCG9         | 3.96E-06      | 2.00E-18     | rs4236134  | 6    | 55551311  | HMGCLL1      | 9.32E-01            | 3.30E-05 | 6.17E-01 | 6.38E-04 |
| rs5009448  | 6    | 30048467 | HCG9         | 3.96E-06      | 2.00E-18     | rs9367646  | 6    | 55574331  | N/A          | 9.31E-01            | 3.06E-05 | 6.56E-01 | 6.85E-04 |
| rs5009448  | 6    | 30048467 | HCG9         | 3.96E-06      | 2.00E-18     | rs4710341  | 6    | 68173593  | N/A          | 3.07E-01            | 7.91E-05 | 2.80E-01 | 2.92E-02 |
| rs5009448  | 6    | 30048467 | HCG9         | 3.96E-06      | 2.00E-18     | rs6905051  | 6    | 141846121 | N/A          | 2.07E-01            | 6.31E-05 | 9.41E-01 | 2.96E-03 |
| rs5009448  | 6    | 30048467 | HCG9         | 3.96E-06      | 2.00E-18     | rs9376628  | 6    | 141902024 | N/A          | 1.46E-01            | 8.03E-05 | 8.20E-01 | 5.43E-03 |
| rs5009448  | 6    | 30048467 | HCG9         | 3.96E-06      | 2.00E-18     | rs11757988 | 6    | 141928389 | N/A          | 3.00E-01            | 3.58E-05 | 7.03E-01 | 5.41E-03 |
| rs5009448  | 6    | 30048467 | HCG9         | 3.96E-06      | 2.00E-18     | rs1477578  | 7    | 49773641  | VWC2         | 6.18E-01            | 1.17E-05 | 2.32E-01 | 2.53E-03 |
| rs5009448  | 6    | 30048467 | HCG9         | 3.96E-06      | 2.00E-18     | rs11975846 | 7    | 81201270  | HGF          | 5.68E-01            | 9.42E-05 | 6.67E-02 | 5.45E-02 |
| rs5009448  | 6    | 30048467 | HCG9         | 3.96E-06      | 2.00E-18     | rs2217092  | 7    | 135635590 | N/A          | 2.89E-01            | 7.43E-05 | 8.78E-01 | 1.79E-03 |
| rs5009448  | 6    | 30048467 | HCG9         | 3.96E-06      | 2.00E-18     | rs10253012 | 7    | 135661486 | N/A          | 2.40E-01            | 6.72E-05 | 9.91E-01 | 1.49E-03 |
| rs5009448  | 6    | 30048467 | HCG9         | 3.96E-06      | 2.00E-18     | rs12155586 | 8    | 9011268   | PPP1R3B      | 2.53E-01            | 3.28E-05 | 4.95E-01 | 4.43E-04 |
| rs5009448  | 6    | 30048467 | HCG9         | 3.96E-06      | 2.00E-18     | rs4921809  | 8    | 17609341  | MTUS1        | 3.81E-01            | 1.39E-05 | 5.65E-01 | 2.52E-03 |
| rs5009448  | 6    | 30048467 | HCG9         | 3.96E-06      | 2.00E-18     | rs7830863  | 8    | 17611182  | MTUS1        | 4.47E-01            | 2.65E-05 | 6.99E-01 | 2.58E-03 |
| rs5009448  | 6    | 30048467 | HCG9         | 3.96E-06      | 2.00E-18     | rs7039700  | 9    | 9673443   | PTPRD        | 9.78E-01            | 6.58E-05 | 3.64E-01 | 2.48E-04 |
| rs5009448  | 6    | 30048467 | HCG9         | 3.96E-06      | 2.00E-18     | rs1327407  | 9    | 19742860  | SLC24A2      | 9.83E-01            | 1.23E-05 | 2.76E-01 | 2.56E-05 |
| rs5009448  | 6    | 30048467 | HCG9         | 3.96E-06      | 2.00E-18     | rs10514825 | 9    | 19744476  | SLC24A2      | 8.96E-01            | 9.85E-05 | 4.31E-01 | 1.28E-04 |
| rs5009448  | 6    | 30048467 | HCG9         | 3.96E-06      | 2.00E-18     | rs2383119  | 9    | 19746769  | SLC24A2      | 3.64E-01            | 4.01E-05 | 2.74E-01 | 6.29E-05 |
| rs5009448  | 6    | 30048467 | HCG9         | 3.96E-06      | 2.00E-18     | rs2808541  | 9    | 100397228 | GABBR2       | 2.03E-01            | 1.42E-05 | 1.20E-01 | 3.65E-05 |
| rs5009448  | 6    | 30048467 | HCG9         | 3.96E-06      | 2.00E-18     | rs2151216  | 9    | 100399213 | GABBR2       | 2.39E-01            | 3.52E-05 | 1.20E-01 | 7.31E-05 |
| rs5009448  | 6    | 30048467 | HCG9         | 3.96E-06      | 2.00E-18     | rs3739915  | 9    | 134266951 | TTF1         | 5.24E-01            | 5.79E-05 | 5.60E-01 | 7.07E-04 |
| rs5009448  | 6    | 30048467 | HCG9         | 3.96E-06      | 2.00E-18     | rs4481939  | 10   | 90824653  | N/A          | 1.35E-01            | 4.98E-06 | 2.42E-01 | 4.02E-05 |
| rs5009448  | 6    | 30048467 | HCG9         | 3.96E-06      | 2.00E-18     | rs10509564 | 10   | 90868929  | N/A          | 2.55E-01            | 2.93E-05 | 1.91E-01 | 4.69E-05 |
| rs5009448  | 6    | 30048467 | HCG9         | 3.96E-06      | 2.00E-18     | rs17465248 | 10   | 90875116  | N/A          | 2.22E-01            | 2.28E-05 | 1.91E-01 | 3.87E-05 |
| rs5009448  | 6    | 30048467 | HCG9         | 3.96E-06      | 2.00E-18     | rs1937346  | 10   | 90879367  | N/A          | 7.96E-02            | 3.91E-06 | 1.97E-01 | 1.67E-05 |
| rs5009448  | 6    | 30048467 | HCG9         | 3.96E-06      | 2.00E-18     | rs10887915 | 10   | 90883230  | N/A          | 2.56E-01            | 1.58E-05 | 1.91E-01 | 2.90E-05 |
| rs5009448  | 6    | 30048467 | HCG9         | 3.96E-06      | 2.00E-18     | rs10749129 | 10   | 115177211 | N/A          | 9.77E-02            | 6.11E-05 | 4.72E-01 | 4.09E-03 |
| rs5009448  | 6    | 30048467 | HCG9         | 3.96E-06      | 2.00E-18     | rs12785600 | 11   | 20043788  | N/AV2        | 4.60E-01            | 2.68E-05 | 7.45E-01 | 4.81E-04 |
| rs5009448  | 6    | 30048467 | HCG9         | 3.96E-06      | 2.00E-18     | rs10835128 | 11   | 27183167  | N/A          | 6.81E-01            | 3.00E-05 | 8.31E-01 | 1.21E-03 |
| rs5009448  | 6    | 30048467 | HCG9         | 3.96E-06      | 2.00E-18     | rs1442930  | 11   | 27189991  | N/A          | 5.88E-01            | 3.45E-05 | 7.10E-01 | 1.00E-03 |
| rs5009448  | 6    | 30048467 | HCG9         | 3.96E-06      | 2.00E-18     | rs10835138 | 11   | 27215475  | N/A          | 6.61E-01            | 2.05E-05 | 7.17E-01 | 5.80E-04 |
| rs5009448  | 6    | 30048467 | HCG9         | 3.96E-06      | 2.00E-18     | rs10835141 | 11   | 27217382  | N/A          | 7.96E-01            | 3.52E-05 | 6.80E-01 | 7.82E-04 |
| rs5009448  | 6    | 30048467 | HCG9         | 3.96E-06      | 2.00E-18     | rs11046677 | 12   | 22928034  | N/A          | 5.04E-01            | 1.30E-05 | 4.61E-01 | 2.06E-03 |
| rs5009448  | 6    | 30048467 | HCG9         | 3.96E-06      | 2.00E-18     | rs11176241 | 12   | 65194084  | N/A          | 4.42E-01            | 5.90E-05 | 5.86E-01 | 9.75E-04 |
| rs5009448  | 6    | 30048467 | HCG9         | 3.96E-06      | 2.00E-18     | rs824209   | 15   | 21598494  | N/A          | 9.00E-01            | 3.14E-05 | 1.95E-01 | 8.10E-03 |
| rs5009448  | 6    | 30048467 | HCG9         | 3.96E-06      | 2.00E-18     | rs1027010  | 15   | 51399446  | N/A          | 9.59E-01            | 6.33E-05 | 8.72E-01 | 2.49E-03 |
| rs5009448  | 6    | 30048467 | HCG9         | 3.96E-06      | 2.00E-18     | rs7497064  | 15   | 64777213  | SMAD6        | 9.28E-01            | 6.58E-05 | 8.39E-02 | 1.18E-05 |
| rs5009448  | 6    | 30048467 | HCG9         | 3.96E-06      | 2.00E-18     | rs1902815  | 16   | 19981996  | GPR139       | 5.25E-01            | 9.72E-05 | 2.68E-03 | 3.40E-01 |
| rs5009448  | 6    | 30048467 | HCG9         | 3.96E-06      | 2.00E-18     | rs9894473  | 17   | 68903231  | SDK2         | 3.45E-01            | 5.42E-05 | 1.50E-01 | 2.38E-02 |
| rs5009448  | 6    | 30048467 | HCG9         | 3.96E-06      | 2.00E-18     | rs549827   | 18   | 5976416   | L3MBTL4      | 4.42E-01            | 5.76E-05 | 4.50E-01 | 6.99E-03 |
| rs5009448  | 6    | 30048467 | HCG9         | 3.96E-06      | 2.00E-18     | rs4798424  | 18   | 5977788   | L3MBTL4      | 4.77E-01            | 5.02E-05 | 4.81E-01 | 5.83E-03 |

| SNP1      |      |          |              |               | SNP2         |            |      |           |              | Interaction p-value |          |          |          |
|-----------|------|----------|--------------|---------------|--------------|------------|------|-----------|--------------|---------------------|----------|----------|----------|
| SNP       | Chr. | Position | Nearest Gene | Taiwan GWAS P | China GWAS P | SNP        | Chr. | Position  | Nearest Gene | GWAS P              | Stage 1  | Stage 2  | Combined |
| rs2076483 | 6    | 29679524 | GABBR1       | 1.23E-05      | 1.30E-12     | rs2722311  | 7    | 37878719  | TXNDC3       | 2.27E-01            | 8.77E-05 | 4.49E-01 | 1.57E-03 |
| rs2076483 | 6    | 29679524 | GABBR1       | 1.23E-05      | 1.30E-12     | rs2722309  | 7    | 37879060  | TXNDC3       | 2.25E-01            | 7.72E-05 | 4.49E-01 | 1.44E-03 |
| rs2076483 | 6    | 29679524 | GABBR1       | 1.23E-05      | 1.30E-12     | rs2217092  | 7    | 135635590 | N/A          | 2.89E-01            | 8.17E-05 | 6.16E-01 | 5.03E-04 |
| rs2076483 | 6    | 29679524 | GABBR1       | 1.23E-05      | 1.30E-12     | rs10253012 | 7    | 135661486 | N/A          | 2.40E-01            | 1.65E-05 | 3.81E-01 | 9.73E-05 |
| rs2076483 | 6    | 29679524 | GABBR1       | 1.23E-05      | 1.30E-12     | rs1882092  | 7    | 135673778 | N/A          | 3.73E-01            | 2.19E-05 | 4.54E-01 | 1.34E-04 |
| rs2076483 | 6    | 29679524 | GABBR1       | 1.23E-05      | 1.30E-12     | rs12671681 | 7    | 135674364 | N/A          | 6.57E-01            | 1.36E-05 | 2.92E-01 | 2.90E-05 |
| rs2076483 | 6    | 29679524 | GABBR1       | 1.23E-05      | 1.30E-12     | rs2954610  | 8    | 3769301   | CSMD1        | 8.81E-01            | 4.17E-05 | 7.41E-02 | 4.96E-05 |
| rs2076483 | 6    | 29679524 | GABBR1       | 1.23E-05      | 1.30E-12     | rs7357519  | 8    | 4399763   | CSMD1        | 3.82E-01            | 1.69E-05 | 3.36E-01 | 5.79E-05 |
| rs2076483 | 6    | 29679524 | GABBR1       | 1.23E-05      | 1.30E-12     | rs4609193  | 8    | 12734835  | N/A          | 2.16E-01            | 9.25E-05 | 8.55E-01 | 1.69E-03 |
| rs2076483 | 6    | 29679524 | GABBR1       | 1.23E-05      | 1.30E-12     | rs9802064  | 8    | 17313332  | MTMR7        | 4.60E-01            | 3.36E-05 | 4.38E-01 | 6.98E-03 |
| rs2076483 | 6    | 29679524 | GABBR1       | 1.23E-05      | 1.30E-12     | rs335244   | 8    | 18689427  | PSD3         | 4.67E-02            | 5.80E-05 | 5.42E-01 | 4.05E-03 |
| rs2076483 | 6    | 29679524 | GABBR1       | 1.23E-05      | 1.30E-12     | rs3808900  | 9    | 124032585 | RBM18        | 3.96E-01            | 9.16E-05 | 1.57E-01 | 5.23E-02 |
| rs2076483 | 6    | 29679524 | GABBR1       | 1.23E-05      | 1.30E-12     | rs9602618  | 13   | 35736074  | C13orf38     | 4.22E-01            | 9.63E-05 | 4.74E-01 | 4.93E-04 |
| rs2076483 | 6    | 29679524 | GABBR1       | 1.23E-05      | 1.30E-12     | rs1359480  | 13   | 107413961 | N/A          | 9.89E-02            | 4.28E-05 | 7.49E-01 | 2.37E-03 |
| rs2076483 | 6    | 29679524 | GABBR1       | 1.23E-05      | 1.30E-12     | rs1952589  | 14   | 56175083  | C14orf101    | 6.68E-01            | 3.03E-05 | 5.38E-01 | 2.50E-04 |
| rs2076483 | 6    | 29679524 | GABBR1       | 1.23E-05      | 1.30E-12     | rs4429270  | 15   | 89828778  | N/A          | 1.63E-01            | 6.68E-05 | 4.44E-01 | 2.04E-04 |
| rs2076483 | 6    | 29679524 | GABBR1       | 1.23E-05      | 1.30E-12     | rs2014341  | 21   | 33267837  | N/A          | 1.79E-01            | 5.42E-05 | 5.29E-01 | 2.69E-04 |
| rs2076483 | 6    | 29679524 | GABBR1       | 1.23E-05      | 1.30E-12     | rs2839557  | 21   | 42863867  | SLC37A1      | 6.47E-01            | 9.47E-05 | 3.82E-02 | 1.01E-01 |
| rs2076483 | 6    | 29679524 | GABBR1       | 1.23E-05      | 1.30E-12     | rs1788414  | 21   | 42878403  | SLC37A1      | 6.36E-01            | 7.81E-05 | 4.13E-02 | 7.94E-02 |
| rs2076483 | 6    | 29679524 | GABBR1       | 1.23E-05      | 1.30E-12     | rs450508   | 21   | 42879076  | SLC37A1      | 6.36E-01            | 7.81E-05 | 4.13E-02 | 7.94E-02 |
| rs2076483 | 6    | 29679524 | GABBR1       | 1.23E-05      | 1.30E-12     | rs401074   | 21   | 42886560  | SLC37A1      | 9.93E-01            | 4.04E-05 | 1.02E-01 | 3.50E-02 |
| rs2076483 | 6    | 29679524 | GABBR1       | 1.23E-05      | 1.30E-12     | rs133504   | 22   | 47290141  | FAM19A5      | 5.68E-01            | 4.23E-05 | 4.39E-01 | 7.06E-03 |
| rs2267633 | 6    | 29678820 | GABBR1       | 1.23E-05      | 1.20E-12     | rs771296   | 2    | 6988986   | RNF144A      | 2.93E-01            | 8.68E-05 | 1.25E-01 | 2.84E-02 |
| rs2267633 | 6    | 29678820 | GABBR1       | 1.23E-05      | 1.20E-12     | rs7560249  | 2    | 36851578  | N/A          | 7.76E-01            | 7.00E-05 | 8.36E-01 | 2.03E-03 |
| rs2267633 | 6    | 29678820 | GABBR1       | 1.23E-05      | 1.20E-12     | rs3856435  | 2    | 175601525 | N/A          | 4.21E-01            | 7.49E-05 | 6.44E-01 | 7.33E-03 |
| rs2267633 | 6    | 29678820 | GABBR1       | 1.23E-05      | 1.20E-12     | rs7587476  | 2    | 215362132 | BARD1        | 4.53E-01            | 1.60E-05 | 5.89E-01 | 2.56E-04 |
| rs2267633 | 6    | 29678820 | GABBR1       | 1.23E-05      | 1.20E-12     | rs33766    | 3    | 45255069  | TMEM158      | 6.96E-01            | 4.46E-05 | 7.57E-02 | 2.07E-05 |
| rs2267633 | 6    | 29678820 | GABBR1       | 1.23E-05      | 1.20E-12     | rs33785    | 3    | 45268267  | N/A          | 1.01E-01            | 7.81E-05 | 5.53E-01 | 3.10E-04 |
| rs2267633 | 6    | 29678820 | GABBR1       | 1.23E-05      | 1.20E-12     | rs12506479 | 4    | 74811025  | IL8          | 4.08E-02            | 9.51E-05 | 3.29E-01 | 4.00E-02 |
| rs2267633 | 6    | 29678820 | GABBR1       | 1.23E-05      | 1.20E-12     | rs4459954  | 4    | 166012451 | N/A          | 4.17E-01            | 9.25E-05 | 7.62E-01 | 1.09E-03 |
| rs2267633 | 6    | 29678820 | GABBR1       | 1.23E-05      | 1.20E-12     | rs13434896 | 4    | 189581756 | N/A          | 3.87E-01            | 7.32E-05 | 7.35E-01 | 9.10E-04 |
| rs2267633 | 6    | 29678820 | GABBR1       | 1.23E-05      | 1.20E-12     | rs7690014  | 4    | 189581857 | N/A          | 3.87E-01            | 7.32E-05 | 7.35E-01 | 9.10E-04 |
| rs2267633 | 6    | 29678820 | GABBR1       | 1.23E-05      | 1.20E-12     | rs10060705 | 5    | 63937060  | RGS7BP       | 4.59E-01            | 8.16E-05 | 7.07E-01 | 1.91E-03 |
| rs2267633 | 6    | 29678820 | GABBR1       | 1.23E-05      | 1.20E-12     | rs724254   | 7    | 7153079   | N/A          | 3.83E-01            | 8.76E-05 | 5.18E-01 | 7.44E-03 |
| rs2267633 | 6    | 29678820 | GABBR1       | 1.23E-05      | 1.20E-12     | rs2722311  | 7    | 37878719  | TXNDC3       | 2.27E-01            | 8.77E-05 | 4.49E-01 | 1.57E-03 |
| rs2267633 | 6    | 29678820 | GABBR1       | 1.23E-05      | 1.20E-12     | rs2722309  | 7    | 37879060  | TXNDC3       | 2.25E-01            | 7.72E-05 | 4.49E-01 | 1.44E-03 |
| rs2267633 | 6    | 29678820 | GABBR1       | 1.23E-05      | 1.20E-12     | rs2217092  | 7    | 135635590 | N/A          | 2.89E-01            | 8.17E-05 | 6.16E-01 | 5.03E-04 |
| rs2267633 | 6    | 29678820 | GABBR1       | 1.23E-05      | 1.20E-12     | rs10253012 | 7    | 135661486 | N/A          | 2.40E-01            | 1.65E-05 | 3.81E-01 | 9.73E-05 |
| rs2267633 | 6    | 29678820 | GABBR1       | 1.23E-05      | 1.20E-12     | rs1882092  | 7    | 135673778 | N/A          | 3.73E-01            | 2.19E-05 | 4.54E-01 | 1.34E-04 |
| rs2267633 | 6    | 29678820 | GABBR1       | 1.23E-05      | 1.20E-12     | rs12671681 | 7    | 135674364 | N/A          | 6.57E-01            | 1.36E-05 | 2.92E-01 | 2.90E-05 |
| rs2267633 | 6    | 29678820 | GABBR1       | 1.23E-05      | 1.20E-12     | rs2954610  | 8    | 3769301   | CSMD1        | 8.81E-01            | 4.17E-05 | 7.41E-02 | 4.96E-05 |
| rs2267633 | 6    | 29678820 | GABBR1       | 1.23E-05      | 1.20E-12     | rs7357519  | 8    | 4399763   | CSMD1        | 3.82E-01            | 1.69E-05 | 3.36E-01 | 5.79E-05 |
| rs2267633 | 6    | 29678820 | GABBR1       | 1.23E-05      | 1.20E-12     | rs4609193  | 8    | 12734835  | N/A          | 2.16E-01            | 9.25E-05 | 8.55E-01 | 1.69E-03 |
| rs2267633 | 6    | 29678820 | GABBR1       | 1.23E-05      | 1.20E-12     | rs9802064  | 8    | 17313332  | MTMR7        | 4.60E-01            | 3.36E-05 | 4.38E-01 | 6.98E-03 |
| rs2267633 | 6    | 29678820 | GABBR1       | 1.23E-05      | 1.20E-12     | rs335244   | 8    | 18689427  | PSD3         | 4.67E-02            | 5.80E-05 | 5.42E-01 | 4.05E-03 |
| rs2267633 | 6    | 29678820 | GABBR1       | 1.23E-05      | 1.20E-12     | rs3808900  | 9    | 124032585 | RBM18        | 3.96E-01            | 9.16E-05 | 1.57E-01 | 5.23E-02 |
| rs2267633 | 6    | 29678820 | GABBR1       | 1.23E-05      | 1.20E-12     | rs9602618  | 13   | 35736074  | C13orf38     | 4.22E-01            | 9.63E-05 | 4.74E-01 | 4.93E-04 |
| rs2267633 | 6    | 29678820 | GABBR1       | 1.23E-05      | 1.20E-12     | rs1359480  | 13   | 107413961 | N/A          | 9.89E-02            | 4.28E-05 | 7.49E-01 | 2.37E-03 |
| rs2267633 | 6    | 29678820 | GABBR1       | 1.23E-05      | 1.20E-12     | rs1952589  | 14   | 56175083  | C14orf101    | 6.68E-01            | 3.03E-05 | 5.38E-01 | 2.50E-04 |
| rs2267633 | 6    | 29678820 | GABBR1       | 1.23E-05      | 1.20E-12     | rs4429270  | 15   | 89828778  | N/A          | 1.63E-01            | 6.68E-05 | 4.44E-01 | 2.04E-04 |
| rs2267633 | 6    | 29678820 | GABBR1       | 1.23E-05      | 1.20E-12     | rs2014341  | 21   | 33267837  | N/A          | 1.79E-01            | 5.42E-05 | 5.29E-01 | 2.69E-04 |
| rs2267633 | 6    | 29678820 | GABBR1       | 1.23E-05      | 1.20E-12     | rs2839557  | 21   | 42863867  | SLC37A1      | 6.47E-01            | 9.47E-05 | 3.82E-02 | 1.01E-01 |
| rs2267633 | 6    | 29678820 | GABBR1       | 1.23E-05      | 1.20E-12     | rs1788414  | 21   | 42878403  | SLC37A1      | 6.36E-01            | 7.81E-05 | 4.13E-02 | 7.94E-02 |
| rs2267633 | 6    | 29678820 | GABBR1       | 1.23E-05      | 1.20E-12     | rs450508   | 21   | 42879076  | SLC37A1      | 6.36E-01            | 7.81E-05 | 4.13E-02 | 7.94E-02 |
| rs2267633 | 6    | 29678820 | GABBR1       | 1.23E-05      | 1.20E-12     | rs401074   | 21   | 42886560  | SLC37A1      | 9.93E-01            | 4.04E-05 | 1.02E-01 | 3.50E-02 |
| rs2267633 | 6    | 29678820 | GABBR1       | 1.23E-05      | 1.20E-12     | rs133504   | 22   | 47290141  | FAM19A5      | 5.68E-01            | 4.23E-05 | 4.39E-01 | 7.06E-03 |
| rs29230   | 6    | 29684372 | GABBR1       | 1.71E-05      | 1.30E-12     | rs771296   | 2    | 6988986   | RNF144A      | 2.93E-01            | 6.21E-05 | 2.00E-01 | 1.84E-02 |
| rs29230   | 6    | 29684372 | GABBR1       | 1.71E-05      | 1.30E-12     | rs7560249  | 2    | 36851578  | N/A          | 7.76E-01            | 6.67E-05 | 8.86E-01 | 2.46E-03 |
| rs29230   | 6    | 29684372 | GABBR1       | 1.71E-05      | 1.30E-12     | rs7587476  | 2    | 215362132 | BARD1        | 4.53E-01            | 2.14E-05 | 7.05E-01 | 3.86E-04 |
| rs29230   | 6    | 29684372 | GABBR1       | 1.71E-05      | 1.30E-12     | rs33766    | 3    | 45255069  | TMEM158      | 6.96E-01            | 3.54E-05 | 5.30E-02 | 1.29E-05 |
| rs29230   | 6    | 29684372 | GABBR1       | 1.71E-05      | 1.30E-12     | rs33785    | 3    | 45268267  | N/A          | 1.01E-01            | 5.76E-05 | 5.48E-01 | 2.94E-04 |
| rs29230   | 6    | 29684372 | GABBR1       | 1.71E-05      | 1.30E-12     | rs33790    | 3    | 45271744  | N/A          | 7.59E-02            | 9.78E-05 | 5.28E-01 | 4.09E-04 |
| rs29230   | 6    | 29684372 | GABBR1       | 1.71E-05      | 1.30E-12     | rs13434896 | 4    | 189581756 | N/A          | 3.87E-01            | 8.88E-05 | 8.36E-01 | 1.21E-03 |
| rs29230   | 6    | 29684372 | GABBR1       | 1.71E-05      | 1.30E-12     | rs7690014  | 4    | 189581857 | N/A          | 3.87E-01            | 8.88E-05 | 8.36E-01 | 1.21E-03 |
| rs29230   | 6    | 29684372 | GABBR1       | 1.71E-05      | 1.30E-12     | rs2129470  | 5    | 1989443   | N/A          | 7.90E-01            | 8.98E-05 | 7.20E-01 | 7.92E-03 |
| rs29230   | 6    | 29684372 | GABBR1       | 1.71E-05      | 1.30E-12     | rs10060705 | 5    | 63937060  | RGS7BP       | 4.59E-01            | 4.87E-05 | 5.44E-01 | 1.25E-03 |
| rs29230   | 6    | 29684372 | GABBR1       | 1.71E-05      | 1.30E-12     | rs2217092  | 7    | 135635590 | N/A          | 2.89E-01            | 4.62E-05 | 4.68E-01 | 3.09E-04 |
| rs29230   | 6    | 29684372 | GABBR1       | 1.71E-05      | 1.30E-12     | rs9642048  | 7    | 135637615 | N/A          | 9.17E-01            | 6.97E-05 | 3.09E-01 | 3.23E-04 |
| rs29230   | 6    | 29684372 | GABBR1       | 1.71E-05      | 1.30E-12     | rs11976656 | 7    | 135660559 | N/A          | 9.88E-01            | 6.27E-05 | 2.78E-01 | 2.56E-04 |
| rs29230   | 6    | 29684372 | GABBR1       | 1.71E-05      | 1.30E-12     | rs10253012 | 7    | 135661486 | N/A          | 2.40E-01            | 8.94E-06 | 2.80E-01 | 5.83E-05 |
| rs29230   | 6    | 29684372 | GABBR1       | 1.71E-05      | 1.30E-12     | rs4579471  | 7    | 135670796 | N/A          | 8.44E-01            | 7.47E-05 | 3.47E-01 | 4.78E-04 |
| rs29230   | 6    | 29684372 | GABBR1       | 1.71E-05      | 1.30E-12     | rs1882092  | 7    | 135673778 | N/A          | 3.73E-01            | 1.25E-05 | 3.53E-01 | 8.43E-05 |
| rs29230   | 6    | 29684372 | GABBR1       | 1.71E-05      | 1.30E-12     | rs12671681 | 7    | 135674364 | N/A          | 6.57E-01            | 8.22E-06 | 2.16E-01 | 1.84E-05 |
| rs29230   | 6    | 29684372 | GABBR1       | 1.71E-05      | 1.30E-12     | rs12707297 | 7    | 135675753 | N/A          | 6.01E-01            | 8.43E-05 | 1.98E-01 | 1.12E-04 |
| rs29230   | 6    | 29684372 | GABBR1       | 1.71E-05      | 1.30         |            |      |           |              |                     |          |          |          |

| SNP1      |      |          |              |               | SNP2         |            |      |           |              | Interaction p-value |          |          |          |
|-----------|------|----------|--------------|---------------|--------------|------------|------|-----------|--------------|---------------------|----------|----------|----------|
| SNP       | Chr. | Position | Nearest Gene | Taiwan GWAS P | China GWAS P | SNP        | Chr. | Position  | Nearest Gene | GWAS P              | Stage 1  | Stage 2  | Combined |
| rs29230   | 6    | 29684372 | GABBR1       | 1.71E-05      | 1.30E-12     | rs1788414  | 21   | 42878403  | SLC37A1      | 6.36E-01            | 9.86E-05 | 3.13E-02 | 9.62E-02 |
| rs29230   | 6    | 29684372 | GABBR1       | 1.71E-05      | 1.30E-12     | rs450508   | 21   | 42879076  | SLC37A1      | 6.36E-01            | 9.86E-05 | 3.13E-02 | 9.62E-02 |
| rs29230   | 6    | 29684372 | GABBR1       | 1.71E-05      | 1.30E-12     | rs401074   | 21   | 42886560  | SLC37A1      | 9.93E-01            | 5.27E-05 | 1.10E-01 | 3.37E-02 |
| rs29230   | 6    | 29684372 | GABBR1       | 1.71E-05      | 1.30E-12     | rs133504   | 22   | 42790141  | FAM19A5      | 5.68E-01            | 5.04E-05 | 3.88E-01 | 8.62E-03 |
| rs3129055 | 6    | 29778240 | HLA-F        | 2.27E-04      | 3.00E-07     | rs7529822  | 1    | 247055082 | SH3BP5L      | 7.87E-01            | 2.24E-05 | 5.53E-01 | 3.39E-04 |
| rs3129055 | 6    | 29778240 | HLA-F        | 2.27E-04      | 3.00E-07     | rs2390601  | 2    | 168223608 | N/A          | 4.56E-01            | 6.03E-05 | 6.61E-01 | 1.78E-03 |
| rs3129055 | 6    | 29778240 | HLA-F        | 2.27E-04      | 3.00E-07     | rs7673403  | 4    | 32550339  | N/A          | 8.16E-02            | 2.36E-05 | 7.83E-01 | 9.97E-04 |
| rs3129055 | 6    | 29778240 | HLA-F        | 2.27E-04      | 3.00E-07     | rs7436505  | 4    | 32583628  | N/A          | 6.95E-02            | 2.46E-05 | 9.46E-01 | 1.31E-03 |
| rs3129055 | 6    | 29778240 | HLA-F        | 2.27E-04      | 3.00E-07     | rs13108458 | 4    | 32614391  | N/A          | 4.50E-02            | 1.76E-05 | 8.02E-01 | 1.92E-03 |
| rs3129055 | 6    | 29778240 | HLA-F        | 2.27E-04      | 3.00E-07     | rs7697063  | 4    | 32623704  | N/A          | 7.31E-02            | 8.94E-06 | 6.61E-01 | 8.71E-04 |
| rs3129055 | 6    | 29778240 | HLA-F        | 2.27E-04      | 3.00E-07     | rs10034211 | 4    | 32627937  | N/A          | 5.44E-02            | 1.12E-05 | 6.82E-01 | 9.37E-04 |
| rs3129055 | 6    | 29778240 | HLA-F        | 2.27E-04      | 3.00E-07     | rs7699693  | 4    | 181532217 | N/A          | 5.14E-01            | 7.98E-05 | 7.81E-01 | 3.05E-03 |
| rs3129055 | 6    | 29778240 | HLA-F        | 2.27E-04      | 3.00E-07     | rs11737709 | 4    | 183920409 | ODZ3         | 8.11E-01            | 3.69E-05 | 3.08E-01 | 1.06E-02 |
| rs3129055 | 6    | 29778240 | HLA-F        | 2.27E-04      | 3.00E-07     | rs12152801 | 5    | 147888538 | HTR4         | 4.37E-01            | 6.23E-05 | 8.23E-01 | 4.23E-03 |
| rs3129055 | 6    | 29778240 | HLA-F        | 2.27E-04      | 3.00E-07     | rs2071596  | 6    | 31614670  | NFKBIL1      | 4.97E-01            | 1.69E-05 | 4.54E-01 | 2.88E-03 |
| rs3129055 | 6    | 29778240 | HLA-F        | 2.27E-04      | 3.00E-07     | rs6929796  | 6    | 31630648  | NFKBIL1      | 6.69E-01            | 9.79E-05 | 5.31E-01 | 6.73E-03 |
| rs3129055 | 6    | 29778240 | HLA-F        | 2.27E-04      | 3.00E-07     | rs4244456  | 8    | 19754748  | INTS10       | 4.74E-01            | 1.90E-05 | 4.56E-01 | 4.21E-03 |
| rs3129055 | 6    | 29778240 | HLA-F        | 2.27E-04      | 3.00E-07     | rs2551698  | 8    | 30700119  | N/A          | 9.65E-01            | 5.79E-05 | 3.71E-01 | 7.69E-04 |
| rs3129055 | 6    | 29778240 | HLA-F        | 2.27E-04      | 3.00E-07     | rs4762975  | 12   | 20642793  | PDE3A        | 2.50E-01            | 9.10E-05 | 7.72E-01 | 5.01E-03 |
| rs3129055 | 6    | 29778240 | HLA-F        | 2.27E-04      | 3.00E-07     | rs11046676 | 12   | 22928001  | N/A          | 3.71E-02            | 3.44E-05 | 1.16E-01 | 2.30E-02 |
| rs3129055 | 6    | 29778240 | HLA-F        | 2.27E-04      | 3.00E-07     | rs10466797 | 12   | 22937090  | N/A          | 8.97E-02            | 5.44E-05 | 1.44E-01 | 2.26E-02 |
| rs3129055 | 6    | 29778240 | HLA-F        | 2.27E-04      | 3.00E-07     | rs2712668  | 12   | 98110506  | ANKS1B       | 9.35E-01            | 7.29E-05 | 9.65E-02 | 2.73E-05 |
| rs3129055 | 6    | 29778240 | HLA-F        | 2.27E-04      | 3.00E-07     | rs1545040  | 19   | 50821839  | N/A          | 3.77E-01            | 8.94E-05 | 5.11E-01 | 1.38E-03 |
| rs3129055 | 6    | 29778240 | HLA-F        | 2.27E-04      | 3.00E-07     | rs2839557  | 21   | 42863867  | SLC37A1      | 6.47E-01            | 4.62E-05 | 3.47E-01 | 1.63E-02 |
| rs3129055 | 6    | 29778240 | HLA-F        | 2.27E-04      | 3.00E-07     | rs451954   | 21   | 42869023  | SLC37A1      | 5.92E-01            | 4.67E-05 | 4.07E-01 | 1.32E-02 |
| rs3129055 | 6    | 29778240 | HLA-F        | 2.27E-04      | 3.00E-07     | rs401074   | 21   | 42886560  | SLC37A1      | 9.93E-01            | 2.41E-05 | 6.75E-01 | 2.89E-03 |
| rs9258122 | 6    | 29779719 | HLA-F        | 2.27E-04      | 2.40E-07     | rs7529822  | 1    | 247055082 | SH3BP5L      | 7.87E-01            | 2.24E-05 | 5.53E-01 | 3.39E-04 |
| rs9258122 | 6    | 29779719 | HLA-F        | 2.27E-04      | 2.40E-07     | rs2390601  | 2    | 168223608 | N/A          | 4.56E-01            | 6.03E-05 | 6.61E-01 | 1.78E-03 |
| rs9258122 | 6    | 29779719 | HLA-F        | 2.27E-04      | 2.40E-07     | rs7673403  | 4    | 32550339  | N/A          | 8.16E-02            | 2.36E-05 | 7.83E-01 | 9.97E-04 |
| rs9258122 | 6    | 29779719 | HLA-F        | 2.27E-04      | 2.40E-07     | rs7436505  | 4    | 32583628  | N/A          | 6.95E-02            | 2.46E-05 | 9.46E-01 | 1.31E-03 |
| rs9258122 | 6    | 29779719 | HLA-F        | 2.27E-04      | 2.40E-07     | rs13108458 | 4    | 32614391  | N/A          | 4.50E-02            | 1.76E-05 | 8.02E-01 | 1.92E-03 |
| rs9258122 | 6    | 29779719 | HLA-F        | 2.27E-04      | 2.40E-07     | rs7697063  | 4    | 32623704  | N/A          | 7.31E-02            | 8.94E-06 | 6.61E-01 | 8.71E-04 |
| rs9258122 | 6    | 29779719 | HLA-F        | 2.27E-04      | 2.40E-07     | rs10034211 | 4    | 32627937  | N/A          | 5.44E-02            | 1.12E-05 | 6.82E-01 | 9.37E-04 |
| rs9258122 | 6    | 29779719 | HLA-F        | 2.27E-04      | 2.40E-07     | rs7699693  | 4    | 181532217 | N/A          | 5.14E-01            | 7.98E-05 | 7.81E-01 | 3.05E-03 |
| rs9258122 | 6    | 29779719 | HLA-F        | 2.27E-04      | 2.40E-07     | rs11737709 | 4    | 183920409 | ODZ3         | 8.11E-01            | 3.69E-05 | 3.08E-01 | 1.06E-02 |
| rs9258122 | 6    | 29779719 | HLA-F        | 2.27E-04      | 2.40E-07     | rs12152801 | 5    | 147888538 | HTR4         | 4.37E-01            | 6.23E-05 | 8.23E-01 | 4.23E-03 |
| rs9258122 | 6    | 29779719 | HLA-F        | 2.27E-04      | 2.40E-07     | rs2071596  | 6    | 31614670  | NFKBIL1      | 4.97E-01            | 1.69E-05 | 4.54E-01 | 2.88E-03 |
| rs9258122 | 6    | 29779719 | HLA-F        | 2.27E-04      | 2.40E-07     | rs6929796  | 6    | 31630648  | NFKBIL1      | 6.69E-01            | 9.79E-05 | 5.31E-01 | 6.73E-03 |
| rs9258122 | 6    | 29779719 | HLA-F        | 2.27E-04      | 2.40E-07     | rs4244456  | 8    | 19754748  | INTS10       | 4.74E-01            | 1.90E-05 | 4.56E-01 | 4.21E-03 |
| rs9258122 | 6    | 29779719 | HLA-F        | 2.27E-04      | 2.40E-07     | rs2551698  | 8    | 30700119  | N/A          | 9.65E-01            | 5.79E-05 | 3.71E-01 | 7.69E-04 |
| rs9258122 | 6    | 29779719 | HLA-F        | 2.27E-04      | 2.40E-07     | rs4762975  | 12   | 20642793  | PDE3A        | 2.50E-01            | 9.10E-05 | 7.72E-01 | 5.01E-03 |
| rs9258122 | 6    | 29779719 | HLA-F        | 2.27E-04      | 2.40E-07     | rs11046676 | 12   | 22928001  | N/A          | 3.71E-02            | 3.44E-05 | 1.16E-01 | 2.30E-02 |
| rs9258122 | 6    | 29779719 | HLA-F        | 2.27E-04      | 2.40E-07     | rs10466797 | 12   | 22937090  | N/A          | 8.97E-02            | 5.44E-05 | 1.44E-01 | 2.26E-02 |
| rs9258122 | 6    | 29779719 | HLA-F        | 2.27E-04      | 2.40E-07     | rs2712668  | 12   | 98110506  | ANKS1B       | 9.35E-01            | 7.29E-05 | 9.65E-02 | 2.73E-05 |
| rs9258122 | 6    | 29779719 | HLA-F        | 2.27E-04      | 2.40E-07     | rs1545040  | 19   | 50821839  | N/A          | 3.77E-01            | 8.94E-05 | 5.11E-01 | 1.38E-03 |
| rs9258122 | 6    | 29779719 | HLA-F        | 2.27E-04      | 2.40E-07     | rs2839557  | 21   | 42863867  | SLC37A1      | 6.47E-01            | 4.62E-05 | 3.47E-01 | 1.63E-02 |
| rs9258122 | 6    | 29779719 | HLA-F        | 2.27E-04      | 2.40E-07     | rs451954   | 21   | 42869023  | SLC37A1      | 5.92E-01            | 4.67E-05 | 4.07E-01 | 1.32E-02 |
| rs9258122 | 6    | 29779719 | HLA-F        | 2.27E-04      | 2.40E-07     | rs401074   | 21   | 42886560  | SLC37A1      | 9.93E-01            | 2.41E-05 | 6.75E-01 | 2.89E-03 |
| rs2894207 | 6    | 31371730 | HLA-B/C      | 5.01E-03      | 1.22E-16     | rs7649284  | 3    | 11836440  | N/A          | 9.72E-02            | 4.64E-05 | N/A      | N/A      |
| rs2894207 | 6    | 31371730 | HLA-B/C      | 5.01E-03      | 1.22E-16     | rs7429580  | 3    | 18126746  | N/A          | 1.98E-01            | 2.05E-05 | N/A      | N/A      |
| rs2894207 | 6    | 31371730 | HLA-B/C      | 5.01E-03      | 1.22E-16     | rs852604   | 5    | 10952234  | N/A          | 7.51E-01            | 3.16E-05 | N/A      | N/A      |
| rs2894207 | 6    | 31371730 | HLA-B/C      | 5.01E-03      | 1.22E-16     | rs9373821  | 6    | 106513692 | N/A          | 8.06E-01            | 5.79E-05 | N/A      | N/A      |
| rs2894207 | 6    | 31371730 | HLA-B/C      | 5.01E-03      | 1.22E-16     | rs1529021  | 6    | 147329532 | N/A          | 4.13E-01            | 6.88E-05 | N/A      | N/A      |
| rs2894207 | 6    | 31371730 | HLA-B/C      | 5.01E-03      | 1.22E-16     | rs9355003  | 6    | 168802701 | SMOC2        | 2.52E-01            | 5.62E-05 | N/A      | N/A      |
| rs2894207 | 6    | 31371730 | HLA-B/C      | 5.01E-03      | 1.22E-16     | rs9346563  | 6    | 168828486 | SMOC2        | 1.43E-01            | 5.75E-06 | N/A      | N/A      |
| rs2894207 | 6    | 31371730 | HLA-B/C      | 5.01E-03      | 1.22E-16     | rs4731630  | 7    | 129214437 | MIR96        | 1.74E-01            | 2.49E-05 | N/A      | N/A      |
| rs2894207 | 6    | 31371730 | HLA-B/C      | 5.01E-03      | 1.22E-16     | rs10900213 | 10   | 45224720  | ALOX5        | 3.34E-01            | 2.74E-05 | N/A      | N/A      |
| rs2894207 | 6    | 31371730 | HLA-B/C      | 5.01E-03      | 1.22E-16     | rs1864758  | 10   | 62473423  | N/A          | 3.72E-01            | 7.24E-05 | N/A      | N/A      |
| rs2894207 | 6    | 31371730 | HLA-B/C      | 5.01E-03      | 1.22E-16     | rs7974440  | 12   | 57699069  | N/A          | 1.43E-01            | 3.44E-05 | N/A      | N/A      |
| rs2894207 | 6    | 31371730 | HLA-B/C      | 5.01E-03      | 1.22E-16     | rs12591292 | 15   | 59880917  | N/A          | 2.35E-01            | 4.94E-05 | N/A      | N/A      |
| rs2894207 | 6    | 31371730 | HLA-B/C      | 5.01E-03      | 1.22E-16     | rs299175   | 19   | 61005340  | NLRP11       | 7.65E-01            | 4.96E-05 | N/A      | N/A      |
| rs9510787 | 13   | 23103195 | TNFRSF19     | 1.78E-02      | 6.32E-07     | rs2149028  | 1    | 188837471 | N/A          | 6.36E-01            | 9.30E-05 | 2.78E-01 | 1.90E-02 |
| rs9510787 | 13   | 23103195 | TNFRSF19     | 1.78E-02      | 6.32E-07     | rs937932   | 2    | 22565821  | N/A          | 3.05E-01            | 3.29E-05 | 1.31E-01 | 4.25E-02 |
| rs9510787 | 13   | 23103195 | TNFRSF19     | 1.78E-02      | 6.32E-07     | rs2303291  | 2    | 24284688  | ITSN2        | 5.53E-01            | 8.40E-05 | 8.50E-01 | 1.79E-03 |
| rs9510787 | 13   | 23103195 | TNFRSF19     | 1.78E-02      | 6.32E-07     | rs9814223  | 3    | 24337256  | THRB         | 5.72E-01            | 7.99E-05 | 7.79E-01 | 9.53E-04 |
| rs9510787 | 13   | 23103195 | TNFRSF19     | 1.78E-02      | 6.32E-07     | rs7649511  | 3    | 24340665  | THRB         | 6.79E-01            | 8.94E-05 | 9.10E-01 | 1.27E-03 |
| rs9510787 | 13   | 23103195 | TNFRSF19     | 1.78E-02      | 6.32E-07     | rs1560073  | 5    | 5766635   | N/A          | 5.00E-01            | 6.64E-05 | 7.63E-01 | 6.88E-03 |
| rs9510787 | 13   | 23103195 | TNFRSF19     | 1.78E-02      | 6.32E-07     | rs185123   | 5    | 139497381 | C5orf53      | 4.37E-01            | 8.38E-05 | 8.31E-02 | 6.74E-02 |
| rs9510787 | 13   | 23103195 | TNFRSF19     | 1.78E         |              |            |      |           |              |                     |          |          |          |

| SNP1      |      |           |              |                 |                 | SNP2       |      |           |              |          |                 | Interaction p-value |                 |  |
|-----------|------|-----------|--------------|-----------------|-----------------|------------|------|-----------|--------------|----------|-----------------|---------------------|-----------------|--|
| SNP       | Chr. | Position  | Nearest Gene | Taiwan GWAS P   | China GWAS P    | SNP        | Chr. | Position  | Nearest Gene | GWAS P   | Stage 1         | Stage 2             | Combined        |  |
| rs1412829 | 9    | 22033926  | CDKN2A-CDKN2 | <b>3.96E-02</b> | <b>2.78E-05</b> | rs11711956 | 3    | 54353640  | CACN/A2D3    | 4.54E-01 | <b>6.06E-05</b> | 9.80E-02            | 9.51E-02        |  |
| rs1412829 | 9    | 22033926  | CDKN2A-CDKN2 | <b>3.96E-02</b> | <b>2.78E-05</b> | rs2941011  | 4    | 37233755  | C4orf19      | 2.44E-01 | <b>5.62E-05</b> | 1.07E-01            | 3.22E-02        |  |
| rs1412829 | 9    | 22033926  | CDKN2A-CDKN2 | <b>3.96E-02</b> | <b>2.78E-05</b> | rs11942503 | 4    | 37237649  | C4orf19      | 1.77E-01 | <b>5.98E-05</b> | 9.80E-02            | 3.42E-02        |  |
| rs1412829 | 9    | 22033926  | CDKN2A-CDKN2 | <b>3.96E-02</b> | <b>2.78E-05</b> | rs2871247  | 4    | 182516400 | N/A          | 5.94E-01 | <b>9.98E-05</b> | 3.77E-01            | <b>9.38E-04</b> |  |
| rs1412829 | 9    | 22033926  | CDKN2A-CDKN2 | <b>3.96E-02</b> | <b>2.78E-05</b> | rs299596   | 5    | 34067771  | C1QTNF3      | 4.77E-01 | <b>1.07E-05</b> | 2.69E-01            | <b>1.53E-05</b> |  |
| rs1412829 | 9    | 22033926  | CDKN2A-CDKN2 | <b>3.96E-02</b> | <b>2.78E-05</b> | rs11760085 | 6    | 150633122 | PPP1R14C     | 7.02E-01 | <b>5.75E-05</b> | 9.62E-01            | <b>2.97E-03</b> |  |
| rs1412829 | 9    | 22033926  | CDKN2A-CDKN2 | <b>3.96E-02</b> | <b>2.78E-05</b> | rs3844600  | 10   | 49353903  | ARHGAP22     | 5.94E-01 | <b>1.20E-05</b> | 8.29E-01            | <b>2.12E-03</b> |  |
| rs1412829 | 9    | 22033926  | CDKN2A-CDKN2 | <b>3.96E-02</b> | <b>2.78E-05</b> | rs3916175  | 20   | 12928826  | SPTLC3       | 8.89E-01 | <b>4.35E-05</b> | 7.16E-01            | <b>4.99E-03</b> |  |
| rs6774494 | 3    | 170565327 | MDS1-EV11    | 2.93E-01        | <b>6.53E-06</b> | rs1674877  | 1    | 4396519   | LOC284661    | 3.50E-01 | <b>5.82E-05</b> | 5.98E-01            | <b>6.78E-04</b> |  |
| rs6774494 | 3    | 170565327 | MDS1-EV11    | 2.93E-01        | <b>6.53E-06</b> | rs780586   | 1    | 4404787   | N/A          | 5.04E-01 | <b>5.04E-05</b> | 6.76E-01            | <b>1.92E-03</b> |  |
| rs6774494 | 3    | 170565327 | MDS1-EV11    | 2.93E-01        | <b>6.53E-06</b> | rs236291   | 1    | 93893230  | BCAR3        | 6.52E-01 | <b>3.48E-05</b> | 1.32E-01            | <b>7.43E-05</b> |  |
| rs6774494 | 3    | 170565327 | MDS1-EV11    | 2.93E-01        | <b>6.53E-06</b> | rs236285   | 1    | 93905376  | BCAR3        | 3.58E-01 | <b>3.63E-05</b> | 9.32E-02            | <b>5.06E-05</b> |  |
| rs6774494 | 3    | 170565327 | MDS1-EV11    | 2.93E-01        | <b>6.53E-06</b> | rs6702036  | 1    | 93924177  | BCAR3        | 5.19E-01 | <b>2.85E-05</b> | 1.90E-01            | <b>9.52E-05</b> |  |
| rs6774494 | 3    | 170565327 | MDS1-EV11    | 2.93E-01        | <b>6.53E-06</b> | rs6660740  | 1    | 93930160  | BCAR3        | 3.35E-01 | <b>4.98E-05</b> | 4.57E-02            | <b>2.06E-05</b> |  |
| rs6774494 | 3    | 170565327 | MDS1-EV11    | 2.93E-01        | <b>6.53E-06</b> | rs6744525  | 2    | 30439770  | N/A          | 5.37E-01 | <b>7.07E-05</b> | N/A                 | N/A             |  |
| rs6774494 | 3    | 170565327 | MDS1-EV11    | 2.93E-01        | <b>6.53E-06</b> | rs7641246  | 3    | 1766598   | N/A          | 3.94E-01 | <b>9.37E-05</b> | 7.60E-01            | <b>3.07E-03</b> |  |
| rs6774494 | 3    | 170565327 | MDS1-EV11    | 2.93E-01        | <b>6.53E-06</b> | rs1881364  | 3    | 10946358  | SLC6A11      | 1.30E-01 | <b>7.37E-06</b> | 9.05E-01            | <b>4.07E-04</b> |  |
| rs6774494 | 3    | 170565327 | MDS1-EV11    | 2.93E-01        | <b>6.53E-06</b> | rs12490768 | 3    | 39538369  | MOBP         | 9.15E-01 | <b>9.98E-05</b> | 6.20E-01            | <b>2.92E-04</b> |  |
| rs6774494 | 3    | 170565327 | MDS1-EV11    | 2.93E-01        | <b>6.53E-06</b> | rs9686756  | 5    | 30406995  | N/A          | 9.06E-01 | <b>9.07E-05</b> | 1.89E-01            | <b>1.93E-04</b> |  |
| rs6774494 | 3    | 170565327 | MDS1-EV11    | 2.93E-01        | <b>6.53E-06</b> | rs3799380  | 6    | 26575161  | BTN3A3       | 9.76E-01 | <b>3.28E-05</b> | 1.70E-01            | 1.27E-02        |  |
| rs6774494 | 3    | 170565327 | MDS1-EV11    | 2.93E-01        | <b>6.53E-06</b> | rs9296015  | 6    | 32326967  | N/A          | 5.38E-01 | <b>7.48E-05</b> | 4.61E-01            | <b>3.83E-03</b> |  |
| rs6774494 | 3    | 170565327 | MDS1-EV11    | 2.93E-01        | <b>6.53E-06</b> | rs4959089  | 6    | 32327703  | N/A          | 5.38E-01 | <b>7.48E-05</b> | 4.61E-01            | <b>3.83E-03</b> |  |
| rs6774494 | 3    | 170565327 | MDS1-EV11    | 2.93E-01        | <b>6.53E-06</b> | rs6901782  | 6    | 43066878  | PEX6         | 1.44E-01 | <b>1.72E-05</b> | 7.53E-01            | <b>3.16E-03</b> |  |
| rs6774494 | 3    | 170565327 | MDS1-EV11    | 2.93E-01        | <b>6.53E-06</b> | rs4714661  | 6    | 43078485  | C6orf153     | 1.74E-01 | <b>8.58E-05</b> | 5.80E-01            | 1.07E-02        |  |
| rs6774494 | 3    | 170565327 | MDS1-EV11    | 2.93E-01        | <b>6.53E-06</b> | rs2026898  | 6    | 87554494  | N/A          | 3.17E-02 | <b>4.72E-05</b> | 6.20E-01            | <b>1.06E-03</b> |  |
| rs6774494 | 3    | 170565327 | MDS1-EV11    | 2.93E-01        | <b>6.53E-06</b> | rs2419601  | 10   | 113796371 | N/A          | 2.10E-01 | <b>5.72E-05</b> | 6.52E-01            | <b>2.98E-03</b> |  |
| rs6774494 | 3    | 170565327 | MDS1-EV11    | 2.93E-01        | <b>6.53E-06</b> | rs669244   | 11   | 121729762 | N/A          | 4.14E-01 | <b>7.72E-05</b> | 8.37E-02            | <b>2.43E-04</b> |  |
| rs6774494 | 3    | 170565327 | MDS1-EV11    | 2.93E-01        | <b>6.53E-06</b> | rs2007044  | 12   | 2215221   | CACN/A1C     | 8.04E-01 | <b>6.35E-05</b> | 5.47E-01            | <b>1.46E-04</b> |  |
| rs6774494 | 3    | 170565327 | MDS1-EV11    | 2.93E-01        | <b>6.53E-06</b> | rs2283292  | 12   | 2241913   | CACN/A1C     | 8.42E-01 | <b>1.88E-05</b> | 6.99E-01            | <b>1.80E-04</b> |  |
| rs6774494 | 3    | 170565327 | MDS1-EV11    | 2.93E-01        | <b>6.53E-06</b> | rs2239038  | 12   | 2244391   | CACN/A1C     | 8.95E-01 | <b>3.16E-05</b> | 8.02E-01            | <b>2.11E-04</b> |  |
| rs6774494 | 3    | 170565327 | MDS1-EV11    | 2.93E-01        | <b>6.53E-06</b> | rs9572286  | 13   | 69262275  | KLHL1        | 1.76E-01 | <b>9.13E-05</b> | 8.25E-01            | <b>1.36E-03</b> |  |
| rs6774494 | 3    | 170565327 | MDS1-EV11    | 2.93E-01        | <b>6.53E-06</b> | rs11619836 | 13   | 69281877  | KLHL1        | 1.98E-01 | <b>8.27E-05</b> | 8.63E-01            | <b>1.13E-03</b> |  |
| rs6774494 | 3    | 170565327 | MDS1-EV11    | 2.93E-01        | <b>6.53E-06</b> | rs1188187  | 14   | 55589993  | N/A          | 1.53E-01 | <b>6.93E-05</b> | <b>2.94E-03</b>     | 3.82E-01        |  |
| rs6774494 | 3    | 170565327 | MDS1-EV11    | 2.93E-01        | <b>6.53E-06</b> | rs1788834  | 16   | 10628697  | TEKT5        | 5.52E-01 | <b>3.71E-05</b> | 6.22E-01            | <b>4.82E-04</b> |  |
| rs6774494 | 3    | 170565327 | MDS1-EV11    | 2.93E-01        | <b>6.53E-06</b> | rs4074471  | 16   | 25866851  | HS3ST4       | 7.17E-01 | <b>5.78E-05</b> | 9.56E-01            | <b>3.30E-03</b> |  |
| rs6774494 | 3    | 170565327 | MDS1-EV11    | 2.93E-01        | <b>6.53E-06</b> | rs16978310 | 18   | 41077512  | N/A          | 9.65E-01 | <b>9.05E-05</b> | 5.56E-01            | <b>2.85E-04</b> |  |
| rs6774494 | 3    | 170565327 | MDS1-EV11    | 2.93E-01        | <b>6.53E-06</b> | rs898438   | 18   | 48485785  | DCC          | 4.23E-01 | <b>9.82E-05</b> | 3.23E-01            | 2.60E-02        |  |
| rs6774494 | 3    | 170565327 | MDS1-EV11    | 2.93E-01        | <b>6.53E-06</b> | rs4809015  | 19   | 19922125  | ZNF93        | 6.53E-01 | <b>4.42E-05</b> | 8.81E-01            | <b>1.17E-03</b> |  |
| rs1572072 | 13   | 23025210  | TNFRSF19     | 3.15E-01        | <b>3.52E-04</b> | rs13005761 | 2    | 40391203  | SLC8A1       | 9.95E-02 | <b>2.89E-05</b> | 7.63E-01            | <b>7.83E-04</b> |  |
| rs1572072 | 13   | 23025210  | TNFRSF19     | 3.15E-01        | <b>3.52E-04</b> | rs759387   | 2    | 40401900  | SLC8A1       | 6.94E-02 | <b>5.85E-05</b> | 9.75E-01            | <b>2.43E-03</b> |  |
| rs1572072 | 13   | 23025210  | TNFRSF19     | 3.15E-01        | <b>3.52E-04</b> | rs6745475  | 2    | 130175179 | N/A          | 4.93E-02 | <b>3.04E-05</b> | <b>8.10E-03</b>     | <b>4.45E-07</b> |  |
| rs1572072 | 13   | 23025210  | TNFRSF19     | 3.15E-01        | <b>3.52E-04</b> | rs12206002 | 6    | 145581160 | N/A          | 6.42E-01 | <b>8.19E-06</b> | 9.87E-01            | <b>4.59E-04</b> |  |
| rs1572072 | 13   | 23025210  | TNFRSF19     | 3.15E-01        | <b>3.52E-04</b> | rs993701   | 6    | 145588357 | N/A          | 8.82E-01 | <b>9.27E-05</b> | 9.41E-01            | <b>1.76E-03</b> |  |
| rs1572072 | 13   | 23025210  | TNFRSF19     | 3.15E-01        | <b>3.52E-04</b> | rs2513755  | 8    | 95166845  | N/A          | 5.43E-01 | <b>9.78E-05</b> | 4.86E-01            | <b>4.63E-04</b> |  |
| rs1572072 | 13   | 23025210  | TNFRSF19     | 3.15E-01        | <b>3.52E-04</b> | rs10809863 | 9    | 12946312  | N/A          | 1.14E-02 | <b>2.00E-05</b> | 9.29E-01            | <b>1.39E-03</b> |  |
| rs1572072 | 13   | 23025210  | TNFRSF19     | 3.15E-01        | <b>3.52E-04</b> | rs10809868 | 9    | 12949428  | N/A          | 1.32E-02 | <b>3.49E-05</b> | 9.89E-01            | <b>2.26E-03</b> |  |
| rs1572072 | 13   | 23025210  | TNFRSF19     | 3.15E-01        | <b>3.52E-04</b> | rs11635176 | 15   | 58367625  | N/A          | 2.94E-01 | <b>6.67E-05</b> | 3.59E-02            | <b>2.31E-05</b> |  |
| rs1572072 | 13   | 23025210  | TNFRSF19     | 3.15E-01        | <b>3.52E-04</b> | rs16942401 | 15   | 58369749  | N/A          | 2.94E-01 | <b>6.13E-05</b> | 3.70E-02            | <b>2.06E-05</b> |  |
| rs1572072 | 13   | 23025210  | TNFRSF19     | 3.15E-01        | <b>3.52E-04</b> | rs12903708 | 15   | 58380597  | N/A          | 2.10E-01 | <b>2.67E-05</b> | 8.69E-02            | <b>2.87E-05</b> |  |
| rs1572072 | 13   | 23025210  | TNFRSF19     | 3.15E-01        | <b>3.52E-04</b> | rs11635321 | 15   | 58383100  | N/A          | 2.10E-01 | <b>2.67E-05</b> | 1.02E-01            | <b>3.34E-05</b> |  |
| rs1572072 | 13   | 23025210  | TNFRSF19     | 3.15E-01        | <b>3.52E-04</b> | rs1509808  | 15   | 58386569  | N/A          | 2.09E-01 | <b>1.84E-05</b> | 7.22E-02            | <b>1.63E-05</b> |  |
| rs1572072 | 13   | 23025210  | TNFRSF19     | 3.15E-01        | <b>3.52E-04</b> | rs4238349  | 15   | 58392217  | N/A          | 2.35E-01 | <b>3.45E-05</b> | 7.22E-02            | <b>2.67E-05</b> |  |
| rs1572072 | 13   | 23025210  | TNFRSF19     | 3.15E-01        | <b>3.52E-04</b> | rs218655   | 17   | 6514688   | MED31        | 4.94E-01 | <b>5.95E-05</b> | 4.16E-01            | <b>3.40E-04</b> |  |
| rs1572072 | 13   | 23025210  | TNFRSF19     | 3.15E-01        | <b>3.52E-04</b> | rs7214006  | 17   | 36600822  | KRTAP4-2     | 2.88E-01 | <b>4.07E-05</b> | 9.87E-01            | <b>1.53E-03</b> |  |
| rs1572072 | 13   | 23025210  | TNFRSF19     | 3.15E-01        | <b>3.52E-04</b> | rs17804219 | 18   | 70073499  | N/A          | 7.18E-01 | <b>6.91E-05</b> | 9.58E-01            | <b>8.71E-04</b> |  |
| rs1572072 | 13   | 23025210  | TNFRSF19     | 3.15E-01        | <b>3.52E-04</b> | rs6517568  | 21   | 40056753  | IGSF5        | 3.67E-01 | <b>7.30E-05</b> | 3.01E-01            | <b>9.20E-03</b> |  |

Note: Significant SNP rs28421666 discovered by China's NPC GWAS study was not included in Taiwan's GWAS study, therefore did not list in this table.  
Note: P values lower than 0.05 was shown in bold face.
