# Supplementary material for: How Genome-Wide SNP-SNP Interactions Relate to Nasopharyngeal Carcinoma Susceptibility
Source: PLoS One. 2013 Dec 23;8(12):e83034. doi: 10.1371/journal.pone.0083034 (PMC3871583; doi:10.1371/journal.pone.0083034)
Supplement: Table S1 — Top 10 000 SNP pairs identified in Stage 1 analysis ranked by interaction significance. (PDF) [file pone.0083034.s005.pdf]

**Supplementary Table S1.** The top 10 000 interaction pairs from the discovery data set

| SNP A |            |          |                 |          | SNP B |           |          |                     |         | Interaction P |          |          | Ranking  | Cluster in top 100 interactions |
|-------|------------|----------|-----------------|----------|-------|-----------|----------|---------------------|---------|---------------|----------|----------|----------|---------------------------------|
| CHR   | SNP        | Location | gle locus P val | Gene     | CHR   | SNP       | Location | single locus P valu | Gene    | MHC region    | Stage 1  | Stage 2  |          |                                 |
| 13    | rs17233815 | 92156875 | 7.20E-01        | GPC5     | 18    | s10871618 | 63228905 | 1.89E-01            | N/A     | -             | 1.97E-10 | 6.96E-01 | 1.28E-06 | 1                               |
| 6     | rs9368675  | 31380136 | 7.91E-01        | N/A      | 6     | rs2253907 | 31444849 | 7.98E-01            | HLA-B   | MHC           | 4.91E-10 | 1.57E-01 | 2.28E-08 | 2                               |
| 6     | rs7750269  | 31379136 | 8.58E-01        | N/A      | 6     | rs2253907 | 31444849 | 7.98E-01            | HLA-B   | MHC           | 6.77E-10 | 1.57E-01 | 3.02E-08 | 3                               |
| 6     | rs9368675  | 31380136 | 7.91E-01        | N/A      | 6     | rs7743761 | 31444079 | 8.81E-01            | HLA-B   | MHC           | 1.44E-09 | 1.55E-01 | 4.26E-08 | 4                               |
| 6     | rs7761965  | 31381474 | 9.15E-01        | N/A      | 6     | rs2253907 | 31444849 | 7.98E-01            | HLA-B   | MHC           | 1.67E-09 | 5.78E-02 | 7.98E-09 | 5                               |
| 6     | rs887464   | 31253899 | 8.59E-02        | TCF19    | 6     | rs3130467 | 31295054 | 5.92E-02            | HCG27   | MHC           | 1.69E-09 | 3.29E-01 | 2.27E-07 | 6                               |
| 6     | rs7750269  | 31379136 | 8.58E-01        | N/A      | 6     | rs7743761 | 31444079 | 8.81E-01            | HLA-B   | MHC           | 1.95E-09 | 1.55E-01 | 5.53E-08 | 7                               |
| 6     | rs396243   | 31383153 | 2.17E-01        | N/A      | 6     | rs7743761 | 31444079 | 8.81E-01            | HLA-B   | MHC           | 1.97E-09 | 2.77E-01 | 1.20E-07 | 8                               |
| 8     | rs4907391  | 1.43E+08 | 7.74E-01        | N/A      | 11    | s10895575 | 1.03E+08 | 6.08E-01            | PDGFD   | -             | 2.01E-09 | 5.74E-01 | 2.07E-05 | 9                               |
| 8     | rs4907391  | 1.43E+08 | 7.74E-01        | N/A      | 11    | s11226161 | 1.03E+08 | 6.08E-01            | PDGFD   | -             | 2.01E-09 | 5.74E-01 | 2.07E-05 | 10                              |
| 8     | rs4907391  | 1.43E+08 | 7.74E-01        | N/A      | 11    | s11226161 | 1.03E+08 | 5.86E-01            | PDGFD   | -             | 2.20E-09 | 5.74E-01 | 2.18E-05 | 11                              |
| 6     | rs9348862  | 31360726 | 7.72E-01        | HLA-C    | 6     | rs2253907 | 31444849 | 7.98E-01            | HLA-B   | MHC           | 2.24E-09 | 3.37E-01 | 4.19E-07 | 12                              |
| 6     | rs9357122  | 31368324 | 7.72E-01        | N/A      | 6     | rs2253907 | 31444849 | 7.98E-01            | HLA-B   | MHC           | 2.24E-09 | 3.37E-01 | 4.19E-07 | 13                              |
| 6     | rs9348862  | 31360726 | 7.72E-01        | HLA-C    | 6     | rs7743761 | 31444079 | 8.81E-01            | HLA-B   | MHC           | 2.30E-09 | 8.81E-02 | 3.06E-08 | 14                              |
| 6     | rs9357122  | 31368324 | 7.72E-01        | N/A      | 6     | rs7743761 | 31444079 | 8.81E-01            | HLA-B   | MHC           | 2.30E-09 | 8.81E-02 | 3.06E-08 | 15                              |
| 2     | rs17013592 | 77088275 | 1.71E-01        | LRRMT4   | 5     | rs468828  | 3205858  | 8.16E-01            | N/A     | -             | 2.52E-09 | 4.04E-01 | 2.69E-05 | 16                              |
| 6     | rs7768444  | 825234   | 5.45E-01        | N/A      | 1     | s11207426 | 59458507 | 2.71E-01            | N/A     | -             | 2.74E-09 | 8.73E-01 | 1.50E-06 | 17                              |
| 6     | rs3686542  | 31253818 | 6.85E-02        | TCF19    | 6     | rs3130467 | 31295054 | 5.92E-02            | HCG27   | MHC           | 2.86E-09 | 5.17E-01 | 1.01E-06 | 18                              |
| 8     | rs868480   | 1.43E+08 | 6.79E-01        | N/A      | 11    | s10895575 | 1.03E+08 | 6.08E-01            | PDGFD   | -             | 2.92E-09 | 5.74E-01 | 3.01E-05 | 19                              |
| 8     | rs868480   | 1.43E+08 | 6.79E-01        | N/A      | 11    | s11226161 | 1.03E+08 | 6.08E-01            | PDGFD   | -             | 2.92E-09 | 5.74E-01 | 3.01E-05 | 20                              |
| 10    | rs10828047 | 20716201 | 2.54E-01        | N/A      | 21    | rs2070413 | 31424285 | 5.67E-01            | TIAM1   | -             | 3.10E-09 | N/A      | N/A      | 21                              |
| 5     | rs307177   | 6140348  | 3.52E-01        | N/A      | 5     | rs6868098 | 1.54E+08 | 8.15E-01            | LARP1   | -             | 3.11E-09 | N/A      | N/A      | 22                              |
| 5     | rs307177   | 6140348  | 3.52E-01        | N/A      | 5     | s10039705 | 1.54E+08 | 8.14E-01            | LARP1   | -             | 3.14E-09 | N/A      | N/A      | 23                              |
| 8     | rs868480   | 1.43E+08 | 6.79E-01        | N/A      | 11    | s11226161 | 1.03E+08 | 5.86E-01            | PDGFD   | -             | 3.20E-09 | 5.74E-01 | 3.18E-05 | 24                              |
| 6     | rs7761965  | 31381474 | 9.15E-01        | N/A      | 6     | rs7743761 | 31444079 | 8.81E-01            | HLA-B   | MHC           | 3.32E-09 | 8.18E-02 | 1.91E-08 | 25                              |
| 5     | rs4348193  | 77671476 | 5.91E-01        | N/A      | 11    | rs826044  | 73445145 | 5.08E-01            | C2CD3   | -             | 3.56E-09 | 9.04E-01 | 5.97E-06 | 26                              |
| 9     | rs11791889 | 35850942 | 3.60E-01        | TMEM8B   | 14    | rs2144039 | 22799242 | 2.41E-01            | HOMEZ   | -             | 3.74E-09 | 9.15E-01 | 1.18E-05 | 27                              |
| 5     | rs1435194  | 1.05E+08 | 1.04E-01        | N/A      | 12    | rs4763075 | 61962124 | 4.02E-01            | N/A     | -             | 3.92E-09 | 7.62E-01 | 6.30E-06 | 28                              |
| 3     | rs4684717  | 10598391 | 7.53E-01        | N/A      | 14    | rs2075493 | 21701518 | 7.45E-02            | N/A     | -             | 4.00E-09 | 9.63E-01 | 1.39E-05 | 29                              |
| 9     | rs10814287 | 35850483 | 3.37E-01        | TMEM8B   | 14    | rs2144039 | 22799242 | 2.41E-01            | HOMEZ   | -             | 4.20E-09 | 8.53E-01 | 1.56E-05 | 30                              |
| 3     | rs1378661  | 1.62E+08 | 8.01E-01        | N/A      | 20    | rs858140  | 24009345 | 2.02E-01            | N/A     | -             | 4.29E-09 | 5.81E-01 | 2.34E-07 | 31                              |
| 3     | rs10935384 | 1.42E+08 | 7.96E-01        | CLSTN2   | 16    | s17680065 | 19988272 | 8.62E-02            | GPR139  | -             | 4.30E-09 | 7.45E-01 | 3.75E-06 | 32                              |
| 1     | rs10919242 | 1.68E+08 | 8.00E-01        | C1orf156 | 12    | rs7980095 | 17131098 | 7.26E-02            | N/A     | -             | 4.39E-09 | 4.51E-02 | 9.05E-04 | 33                              |
| 1     | rs12035144 | 1.68E+08 | 8.00E-01        | C1orf156 | 12    | rs7980095 | 17131098 | 7.26E-02            | N/A     | -             | 4.39E-09 | 5.24E-02 | 7.96E-04 | 34                              |
| 18    | rs12961805 | 55117108 | 8.71E-01        | CPLX4    | 20    | rs6061928 | 59971673 | 4.29E-01            | TAF4    | -             | 4.39E-09 | 4.28E-01 | 7.16E-08 | 35                              |
| 5     | rs4348193  | 77671476 | 5.91E-01        | N/A      | 11    | s11235995 | 73484091 | 3.56E-01            | C2CD3   | -             | 4.46E-09 | 9.54E-01 | 4.68E-06 | 36                              |
| 5     | rs4348193  | 77671476 | 5.91E-01        | N/A      | 11    | rs7125032 | 73484690 | 3.56E-01            | C2CD3   | -             | 4.46E-09 | 9.54E-01 | 4.68E-06 | 37                              |
| 5     | rs4348193  | 77671476 | 5.91E-01        | N/A      | 11    | rs7110734 | 73530035 | 3.56E-01            | C2CD3   | -             | 4.46E-09 | 9.86E-01 | 3.76E-06 | 38                              |
| 1     | rs12041287 | 1.65E+08 | 2.21E-01        | GPA33    | 12    | rs2632226 | 75535673 | 3.99E-01            | N/A     | -             | 4.67E-09 | 7.64E-01 | 1.88E-06 | 39                              |
| 1     | rs4656520  | 1.65E+08 | 6.30E-01        | GPA33    | 12    | rs2632226 | 75535673 | 3.99E-01            | N/A     | -             | 4.99E-09 | 3.49E-01 | 1.69E-05 | 40                              |
| 2     | rs1346722  | 1.68E+08 | 6.75E-01        | XIRP2    | 19    | rs889362  | 18619255 | 5.85E-02            | KLHL26  | -             | 5.03E-09 | 3.89E-02 | 3.13E-04 | 41                              |
| 6     | rs7768444  | 825234   | 5.45E-01        | N/A      | 1     | s12044604 | 59427090 | 5.87E-01            | N/A     | -             | 5.17E-09 | 5.72E-01 | 2.14E-07 | 42                              |
| 6     | rs7768444  | 825234   | 5.45E-01        | N/A      | 1     | rs3850543 | 59426218 | 5.46E-01            | N/A     | -             | 5.21E-09 | 5.72E-01 | 2.13E-07 | 43                              |
| 3     | rs4684717  | 10598391 | 7.53E-01        | N/A      | 14    | rs1894371 | 21704535 | 1.04E-01            | N/A     | -             | 5.31E-09 | 9.33E-01 | 2.01E-05 | 44                              |
| 4     | rs3762876  | 9580800  | 7.86E-03        | PDLIM5   | 4     | s10489022 | 1.38E+08 | 9.82E-01            | N/A     | -             | 5.43E-09 | 8.74E-01 | 2.89E-06 | 45                              |
| 6     | rs887464   | 31253899 | 8.59E-02        | TCF19    | 6     | rs3130473 | 31307187 | 2.29E-01            | N/A     | MHC           | 5.74E-09 | 2.18E-01 | 3.00E-07 | 46                              |
| 7     | rs219827   | 98486005 | 1.84E-01        | SMURF1   | 12    | s10843756 | 30507005 | 6.47E-01            | N/A     | -             | 5.86E-09 | 2.13E-01 | 2.31E-08 | 47                              |
| 14    | rs12050150 | 31637758 | 2.91E-01        | ARHGAP5  | 19    | rs296364  | 53067510 | 3.31E-01            | SULT2A1 | -             | 5.90E-09 | 8.96E-01 | 1.45E-05 | 48                              |
| 5     | rs4568402  | 2150011  | 7.54E-01        | N/A      | 8     | rs1430849 | 1.26E+08 | 1.05E-01            | MTSS1   | -             | 6.10E-09 | 1.54E-01 | 1.47E-03 | 49                              |
| 5     | rs4348193  | 77671476 | 5.91E-01        | N/A      | 11    | rs1800849 | 73397813 | 6.34E-01            | UCP3    | -             | 6.31E-09 | 9.18E-01 | 7.06E-06 | 50                              |
| 1     | rs12041287 | 1.65E+08 | 2.21E-01        | GPA33    | 12    | rs922380  | 75600329 | 7.23E-01            | N/A     | -             | 6.43E-09 | 1.73E-01 | 7.20E-05 | 51                              |
| 1     | rs12140479 | 70595826 | 2.66E-01        | ANKRD13C | 8     | s12676876 | 69767325 | 1.32E-01            | C8orf34 | -             | 6.53E-09 | 3.69E-01 | 1.09E-06 | 52                              |
| 6     | rs4122189  | 31275906 | 7.70E-02        | HCG27    | 6     | rs3130473 | 31307187 | 2.29E-01            | N/A     | MHC           | 6.53E-09 | 7.02E-01 | 4.87E-05 | 53                              |
| 5     | rs4299769  | 2150562  | 6.31E-01        | N/A      | 8     | rs1430849 | 1.26E+08 | 1.05E-01            | MTSS1   | -             | 6.63E-09 | 1.84E-01 | 1.52E-03 | 54                              |
| 5     | rs4348193  | 77671476 | 5.91E-01        | N/A      | 11    | s11236025 | 73555872 | 3.42E-01            | C2CD3   | -             | 6.98E-09 | 9.99E-01 | 5.35E-06 | 55                              |
| 2     | rs16986953 | 19805954 | 3.64E-01        | N/A      | 10    | s11258082 | 13039121 | 1.64E-01            | CCDC3   | -             | 7.19E-09 | 8.99E-01 | 2.39E-06 | 56                              |
| 6     | rs12660608 | 1.23E+08 | 8.18E-02        | CLVS2    | 1     | rs1552991 | 1.5E+08  | 1.63E-01            | HRNR    | -             | 7.24E-09 | 3.13E-01 | 4.87E-05 | 57                              |
| 6     | rs2078901  | 67052116 | 7.04E-01        | N/A      | 9     | rs1169848 | 88671816 | 1.22E-01            | N/A     | -             | 7.54E-09 | 3.82E-01 | 1.94E-06 | 58                              |
| 6     | rs11753072 | 811963   | 7.32E-01        | N/A      | 1     | s11207426 | 59458507 | 2.71E-01            | N/A     | -             | 8.06E-09 | 7.53E-01 | 1.92E-06 | 59                              |
| 3     | rs2049276  | 1.5E+08  | 3.00E-01        | N/A      | 11    | rs720749  | 1.09E+08 | 5.35E-01            | N/A     | -             | 8.41E-09 | 6.35E-01 | 1.87E-07 | 60                              |
| 6     | rs4122189  | 31275906 | 7.70E-02        | HCG27    | 6     | rs3130467 | 31295054 | 5.92E-02            | HCG27   | MHC           | 8.45E-09 | 3.42E-01 | 1.23     |                                 |

| SNP A |            |          |                |          | SNP B |            |          |                     |             | MHC region | Interaction P |          |          | Ranking | Cluster in top 100 interactions |
|-------|------------|----------|----------------|----------|-------|------------|----------|---------------------|-------------|------------|---------------|----------|----------|---------|---------------------------------|
| CHR   | SNP        | Location | gle locus P va | Gene     | CHR   | SNP        | Location | single locus P valu | Gene        |            | Stage 1       | Stage 2  | Combined |         |                                 |
| 9     | rs7869423  | 1624618  | 8.04E-01       | N/A      | 17    | rs11650222 | 52864287 | 4.11E-01            | MSI2        | -          | 1.49E-08      | 3.15E-01 | 2.56E-07 | 111     |                                 |
| 1     | rs2358994  | 1.14E+08 | 9.12E-01       | BCL2L15  | 16    | rs8044476  | 71358068 | 7.56E-01            | ZFXH3       | -          | 1.50E-08      | 3.79E-01 | 6.20E-05 | 112     |                                 |
| 5     | rs1435194  | 1.05E+08 | 1.04E-01       | N/A      | 12    | rs12824011 | 61935103 | 2.85E-01            | N/A         | -          | 1.52E-08      | 7.77E-01 | 1.27E-05 | 113     |                                 |
| 7     | rs219827   | 98486005 | 1.84E-01       | SMURF1   | 12    | rs1077173  | 30507860 | 5.51E-01            | N/A         | -          | 1.52E-08      | 4.64E-02 | 4.10E-09 | 114     |                                 |
| 1     | rs3813982  | 2.05E+08 | 5.44E-01       | N/A      | 19    | rs17361438 | 53540514 | 6.59E-01            | TMEM143     | -          | 1.53E-08      | 4.22E-01 | 1.44E-04 | 115     |                                 |
| 3     | rs6790154  | 1.26E+08 | 4.27E-01       | SLC12A8  | 3     | rs1430408  | 1.58E+08 | 2.53E-01            | N/A         | -          | 1.55E-08      | 2.12E-01 | 1.42E-06 | 116     |                                 |
| 3     | rs4684717  | 10598391 | 7.53E-01       | N/A      | 14    | rs2242542  | 21740815 | 8.39E-02            | N/A         | -          | 1.56E-08      | 8.53E-01 | 2.36E-05 | 117     |                                 |
| 7     | rs6460664  | 70638550 | 2.18E-01       | WBSR17   | 9     | rs3789311  | 1.23E+08 | 7.66E-01            | CEP110      | -          | 1.56E-08      | 1.01E-02 | 1.50E-09 | 118     |                                 |
| 1     | rs1410244  | 1.65E+08 | 4.30E-01       | DUSP27   | 12    | rs2632226  | 75535673 | 3.99E-01            | N/A         | -          | 1.56E-08      | 1.61E-01 | 1.45E-04 | 119     |                                 |
| 4     | rs13144404 | 44130442 | 8.14E-01       | KCTD8    | 12    | rs10858403 | 75142247 | 1.81E-03            | N/A         | -          | 1.59E-08      | 2.38E-01 | 1.94E-04 | 120     |                                 |
| 4     | rs7660000  | 89970881 | 2.31E-01       | FAM13A   | 5     | rs6863774  | 55730873 | 1.10E-01            | N/A         | -          | 1.60E-08      | 1.45E-01 | 4.38E-07 | 121     |                                 |
| 17    | rs17247848 | 28008297 | 5.07E-01       | MYO1D    | 18    | rs1893489  | 46449659 | 8.82E-01            | MAPK4       | -          | 1.63E-08      | 3.49E-01 | 4.21E-04 | 122     |                                 |
| 1     | rs6673606  | 1.81E+08 | 6.15E-01       | LAMC2    | 11    | rs4244525  | 26652919 | 2.96E-01            | SLC5A12     | -          | 1.64E-08      | 4.88E-01 | 9.44E-07 | 123     |                                 |
| 8     | rs352810   | 15666890 | 6.99E-01       | TUSC3    | 18    | rs2432842  | 68860542 | 1.84E-01            | N/A         | -          | 1.65E-08      | 5.31E-01 | 1.71E-06 | 124     |                                 |
| 2     | rs6712787  | 2.21E+08 | 4.12E-01       | N/A      | 5     | rs6596352  | 1.36E+08 | 5.11E-01            | N/A         | -          | 1.66E-08      | 7.78E-01 | 3.28E-05 | 125     |                                 |
| 2     | rs7599725  | 2.21E+08 | 4.12E-01       | N/A      | 5     | rs6596352  | 1.36E+08 | 5.11E-01            | N/A         | -          | 1.66E-08      | 7.78E-01 | 3.28E-05 | 126     |                                 |
| 2     | rs12694536 | 2.21E+08 | 4.14E-01       | N/A      | 5     | rs6596352  | 1.36E+08 | 5.11E-01            | N/A         | -          | 1.67E-08      | 7.13E-01 | 4.91E-05 | 127     |                                 |
| 1     | rs10922563 | 89319391 | 2.84E-01       | GBP1     | 13    | rs2321997  | 58561359 | 6.41E-01            | N/A         | -          | 1.69E-08      | 4.64E-01 | 8.60E-07 | 128     |                                 |
| 5     | rs4348193  | 77671476 | 5.91E-01       | N/A      | 11    | rs1944971  | 73601066 | 3.55E-01            | PPME1       | -          | 1.70E-08      | 9.99E-01 | 8.96E-06 | 129     |                                 |
| 1     | rs4554704  | 1.94E+08 | 9.33E-01       | N/A      | 20    | rs1052653  | 49438061 | 4.58E-01            | NFATC2      | -          | 1.75E-08      | 5.42E-01 | 8.62E-05 | 130     |                                 |
| 1     | rs1597732  | 1.94E+08 | 9.22E-01       | N/A      | 20    | rs1052653  | 49438061 | 4.58E-01            | NFATC2      | -          | 1.77E-08      | 6.50E-01 | 7.00E-05 | 131     |                                 |
| 6     | rs6911781  | 1.14E+08 | 3.17E-01       | N/A      | 2     | rs1383413  | 1.8E+08  | 8.86E-01            | ZNF385B     | -          | 1.77E-08      | N/A      | N/A      | 132     |                                 |
| 1     | rs556596   | 28281983 | 6.43E-02       | EYA3     | 19    | rs2290669  | 16356774 | 8.42E-01            | EPS15L1     | -          | 1.79E-08      | 8.55E-01 | 6.05E-06 | 133     |                                 |
| 1     | rs384642   | 91403679 | 1.49E-01       | N/A      | 11    | rs10832843 | 1354595  | 4.92E-02            | BRSK2       | -          | 1.79E-08      | 9.69E-01 | 3.02E-06 | 134     |                                 |
| 6     | rs12660608 | 1.23E+08 | 8.18E-02       | CLVS2    | 1     | rs17596572 | 1.5E+08  | 1.20E-01            | HRNR        | -          | 1.81E-08      | 3.74E-01 | 4.81E-05 | 135     |                                 |
| 3     | rs2712353  | 1.15E+08 | 5.03E-01       | ATP6V1A  | 12    | rs4762758  | 20505926 | 3.12E-01            | PDE3A       | -          | 1.82E-08      | 3.30E-01 | 2.69E-04 | 136     |                                 |
| 8     | rs12676761 | 64030368 | 9.01E-01       | NKAIN3   | 10    | rs7091494  | 14887155 | 9.95E-01            | CDNF        | -          | 1.87E-08      | 6.81E-01 | 8.68E-06 | 137     |                                 |
| 5     | rs2560412  | 5202621  | 4.31E-01       | ADAMTS16 | 12    | rs862231   | 89243803 | 5.47E-02            | N/A         | -          | 1.87E-08      | N/A      | N/A      | 138     |                                 |
| 5     | rs4348193  | 77671476 | 5.91E-01       | N/A      | 11    | rs1685333  | 73405807 | 6.89E-01            | C2CD3       | -          | 1.88E-08      | 7.28E-01 | 3.47E-05 | 139     |                                 |
| 6     | rs7761965  | 31381474 | 9.15E-01       | N/A      | 6     | rs2523608  | 31430538 | 3.16E-01            | HLA-B       | MHC        | 1.89E-08      | 1.51E-01 | N/A      | 140     |                                 |
| 7     | rs886972   | 1.48E+08 | 7.02E-01       | CNTNAP2  | 17    | rs6063634  | 49376385 | 4.82E-01            | N/A         | -          | 1.89E-08      | 8.85E-01 | 8.11E-06 | 141     |                                 |
| 3     | rs12492728 | 40601372 | 6.26E-01       | N/A      | 17    | rs9905601  | 37268737 | 2.20E-01            | KLHL10      | -          | 1.90E-08      | 5.81E-01 | 1.14E-04 | 142     |                                 |
| 1     | rs3013101  | 13672722 | 6.40E-01       | N/A      | 13    | rs7331424  | 22484366 | 5.73E-01            | N/A         | -          | 1.92E-08      | 6.56E-01 | 8.29E-05 | 143     |                                 |
| 1     | rs3908575  | 98636348 | 6.82E-01       | N/A      | 9     | rs17083205 | 82166375 | 1.33E-01            | N/A         | -          | 1.94E-08      | 2.04E-01 | 6.05E-07 | 144     |                                 |
| 2     | rs7566955  | 1.41E+08 | 1.25E-02       | N/A      | 12    | rs12298303 | 56947982 | 3.10E-01            | N/A         | -          | 1.94E-08      | 7.21E-01 | 6.44E-05 | 145     |                                 |
| 9     | rs1463014  | 22934927 | 9.91E-01       | N/A      | 15    | rs691      | 22915888 | 2.47E-01            | SNORD116-27 | -          | 1.95E-08      | 4.33E-01 | 3.61E-07 | 146     |                                 |
| 2     | rs6737780  | 2.39E+08 | 2.74E-01       | TRAF3IP1 | 10    | rs17097516 | 1.2E+08  | 8.73E-01            | N/A         | -          | 1.95E-08      | 7.42E-01 | 2.19E-05 | 147     |                                 |
| 6     | rs4896219  | 1.37E+08 | 8.74E-01       | MAP3K5   | 8     | rs2979419  | 62167326 | 2.62E-01            | N/A         | -          | 1.95E-08      | 9.90E-01 | 1.41E-05 | 148     |                                 |
| 5     | rs2162928  | 6137255  | 3.48E-01       | N/A      | 5     | rs6868098  | 1.54E+08 | 8.15E-01            | LARP1       | -          | 1.96E-08      | 4.22E-01 | 5.25E-05 | 149     |                                 |
| 3     | rs1522948  | 1.5E+08  | 3.82E-01       | N/A      | 11    | rs720749   | 1.09E+08 | 5.35E-01            | N/A         | -          | 1.96E-08      | 6.37E-01 | 2.81E-07 | 150     |                                 |
| 12    | rs1872521  | 1.27E+08 | 8.77E-01       | N/A      | 22    | rs8136069  | 35052436 | 4.00E-01            | MYH9        | -          | 1.97E-08      | 4.81E-01 | 2.65E-06 | 151     |                                 |
| 1     | rs950302   | 1.65E+08 | 5.39E-01       | DUSP27   | 12    | rs2632226  | 75535673 | 3.99E-01            | N/A         | -          | 1.97E-08      | 3.57E-01 | 4.03E-05 | 152     |                                 |
| 8     | rs12056725 | 1.46E+08 | 1.28E-01       | SCRT1    | 10    | rs1471824  | 72405746 | 7.51E-01            | N/A         | -          | 2.00E-08      | 6.12E-01 | 1.06E-04 | 153     |                                 |
| 5     | rs2162928  | 6137255  | 3.48E-01       | N/A      | 5     | rs10039705 | 1.54E+08 | 8.14E-01            | LARP1       | -          | 2.00E-08      | 4.52E-01 | 4.20E-05 | 154     |                                 |
| 1     | rs7523434  | 1.65E+08 | 1.28E-01       | GPA33    | 12    | rs2632226  | 75535673 | 3.99E-01            | N/A         | -          | 2.02E-08      | 8.61E-01 | 5.64E-06 | 155     |                                 |
| 12    | rs2268009  | 6210649  | 8.30E-01       | CD9      | 12    | rs748380   | 1.16E+08 | 7.37E-01            | C12orf49    | -          | 2.05E-08      | 7.84E-01 | 1.58E-05 | 156     |                                 |
| 6     | rs7768444  | 825234   | 5.45E-01       | N/A      | 1     | rs331635   | 59438130 | 5.19E-01            | N/A         | -          | 2.05E-08      | 8.44E-01 | 1.24E-05 | 157     |                                 |
| 3     | rs1871493  | 1.42E+08 | 8.68E-01       | CLSTN2   | 5     | rs2052007  | 1.29E+08 | 9.44E-01            | CHSY3       | -          | 2.06E-08      | 9.48E-01 | 1.96E-05 | 158     |                                 |
| 2     | rs2052955  | 82182372 | 1.41E-02       | N/A      | 17    | rs2240774  | 72222167 | 7.40E-01            | JMJD6       | -          | 2.07E-08      | 2.39E-01 | 1.52E-04 | 159     |                                 |
| 1     | rs680925   | 66355709 | 3.11E-01       | PDE4B    | 1     | rs6685742  | 1.7E+08  | 2.31E-01            | N/A         | -          | 2.08E-08      | 9.30E-01 | 1.57E-05 | 160     |                                 |
| 2     | rs7577337  | 1.69E+08 | 1.27E-01       | N/A      | 12    | rs10877902 | 61330448 | 8.81E-01            | PPM1H       | -          | 2.12E-08      | 6.64E-01 | 2.46E-04 | 161     |                                 |
| 3     | rs3845906  | 66609292 | 2.77E-01       | LRIG1    | 18    | rs2132918  | 14586020 | 1.90E-01            | N/A         | -          | 2.13E-08      | 9.96E-01 | 8.88E-06 | 162     |                                 |
| 2     | rs4669572  | 10392759 | 5.05E-02       | HPCAL1   | 11    | rs1346118  | 19176075 | 6.24E-01            | CSRP3       | -          | 2.15E-08      | 4.25E-01 | 5.96E-05 | 163     |                                 |
| 2     | rs17012765 | 76565481 | 9.53E-02       | N/A      | 5     | rs874547   | 66180569 | 1.71E-01            | MAST4       | -          | 2.15E-08      | 5.45E-01 | 1.25E-06 | 164     |                                 |
| 3     | rs7648359  | 1.36E+08 | 5.09E-01       | EPHB1    | 13    | rs7322307  | 36248679 | 9.25E-01            | N/A         | -          | 2.15E-08      | 6.53E-01 | 1.53E-04 | 165     |                                 |
| 10    | rs1110399  | 72770272 | 3.81E-01       | N/A      | 13    | rs963943   | 53356272 | 1.90E-01            | N/A         | -          | 2.16E-08      | 1.96E-01 | 5.16E-04 | 166     |                                 |
| 5     | rs274362   | 53372577 | 5.22E-01       | ARL15    | 17    | rs2305529  | 71213848 | 4.16E-01            | ITGB4       | -          | 2.17E-08      | 5.83E-01 | 6.89E-05 | 167     |                                 |
| 3     | rs823028   | 1.96E+08 | 1.97E-01       | N/A      | 9     | rs11138025 | 80848452 | 4.85E-01            | N/A         | -          | 2.17E-08      | 6.44E-01 | 1.83E-04 | 168     |                                 |
| 9     | rs295957   | 31265572 | 2.18E-01       | POU5F1   | 6     | rs3130467  | 31295054 | 5.92E-02            | HCG27       | MHC        | 2.18E-08      | 4.13E-01 | 3.03E-06 | 169     |                                 |
| 2     | rs205628   | 74814524 | 5.13E-01       | N/A      | 5     | rs752283   | 1.78E+08 | 8.21E-01            | COL23A1     | -          | 2.21E-08      | 8.58E-01 | 1.14E-05 | 170     |                                 |
| 1     | rs478665   | 65288121 | 8.38E-01       | MIR101-1 | 10    | rs4787022  | 21053851 | 8.02E-01            | N/A         | -          | 2.21E-08      | 5.73E-01 | 1.43E-06 | 171     |                                 |
| 6     | rs2233984  | 31187243 | 4.20E-02       | C6orf15  | 6     | rs4122189  | 31275906 | 7.70E-02            | HCG27       | MHC        | 2.21E-08      | 1.22E-01 | 2.37E-07 | 172     |                                 |
| 10    | rs11006830 | 28396093 | 1.45E-01       | MPP7     | 19    | rs1661926  | 58324708 | 8.62E-01            | ZNF415      | -          | 2.22E-08      | 9.93E-01 | 7.79E-06 | 173     |                                 |
| 2     | rs12471133 | 1.56E+08 | 6.61E-01       | N/A      | 4     | rs1001444  | 27369239 | 7.92E-01            | N/A         | -          | 2.23E-08      | 2.05E-01 | 1.59E-03 | 174     |                                 |
| 1     | rs1688582  | 1.02E+08 | 4.62E-01       | N/A      | 3     | rs4688645  | 61595936 | 3.39E-01            | PTPRG       | -          | 2.25E-08      | 9.91E-01 | 3.54E-05 | 175     |                                 |
| 1     | rs1125953  | 1.96E+08 | 9.32E-01       | N/A      | 7     | rs194834   | 1.04E+08 | 9.34E-01            | ORC5L       | -          | 2.26E-08      | 8.07E-01 | 5.70E-06 | 176     |                                 |
| 11    | rs555097   | 56919292 | 3.56E-01       | PRG3     | 14    | rs8020693  | 69670487 | 5.66E-01            | SLC8A3      | -          | 2.27E-08      | 5.99E-01 | 2.61E-06 | 177     |                                 |
| 11    | rs555097   | 56919292 | 3.56E-01       | PRG3     | 14    | rs8022074  | 69670478 | 5.66E-01            | SLC8A3      | -          | 2.27E-08      | 5.99E-01 | 2.61E-06 | 178     |                                 |
| 11    | rs3851114  | 56923237 | 3.39E-01       | PRG3     | 14    | rs8020693  | 69670487 | 5.66E-01            | SLC8A3      | -          | 2.27E-08      | 6.73E-01 | 5.69E-06 | 179     |                                 |
| 11    | rs3851114  | 56923237 | 3.39E-01       | PRG3     | 14    | rs8022074  | 69670478 | 5.66E-01            | SLC8A3      | -          | 2.27E-08      | 6.73E-01 | 5.69E-06 | 180     |                                 |
| 21    | rs2829160  | 24840460 | 2.46E-01       | N/A      | 22    | rs17210001 | 18294854 | 7.97E-02            | TXNRD2      | -          | 2.28E-08      | 8.66E-01 | 4.71E-05 | 181     |                                 |
| 1     | rs12040932 | 28183811 | 8.69E-02       | EYA3     | 19    | rs2290669  | 16356774 | 8.42E-01            | EPS15L1     | -          | 2.29E-08      | 9.01E-01 | 3.32E-06 | 182     | </                              |

| SNP A |            |          |                 |          | SNP B |           |          |                    |           | Interaction P |          |          | Ranking  | Cluster in top 100 interactions |  |
|-------|------------|----------|-----------------|----------|-------|-----------|----------|--------------------|-----------|---------------|----------|----------|----------|---------------------------------|--|
| CHR   | SNP        | Location | gle locus P val | Gene     | CHR   | SNP       | Location | single locus P val | Gene      | MHC region    | Stage 1  | Stage 2  | Combined |                                 |  |
| 6     | rs9355586  | 1.67E+08 | 6.60E-01        | RPS6KA2  | 12    | s12580153 | 91342613 | 1.82E-01           | CLU1      | -             | 2.83E-08 | 2.34E-01 | 3.05E-04 | 223                             |  |
| 6     | rs4495304  | 31188697 | 4.80E-02        | C6orf15  | 6     | rs4122189 | 31275906 | 7.70E-02           | HCG27     | MHC           | 2.83E-08 | 1.22E-01 | 2.90E-07 | 224                             |  |
| 1     | rs4658931  | 2.29E+08 | 4.05E-01        | FAM89A   | 12    | s10858625 | 86517374 | 8.47E-01           | N/A       | -             | 2.84E-08 | 3.92E-01 | 8.16E-06 | 225                             |  |
| 14    | rs4584745  | 53097749 | 5.78E-01        | N/A      | 20    | rs1736493 | 43960401 | 5.37E-01           | PLTP      | -             | 2.84E-08 | 9.93E-01 | 3.00E-05 | 226                             |  |
| 8     | rs1598294  | 15675662 | 7.57E-01        | TUSC3    | 18    | rs8093852 | 68855454 | 1.39E-01           | N/A       | -             | 2.85E-08 | 2.87E-01 | 3.07E-07 | 227                             |  |
| 5     | rs252155   | 1.5E+08  | 6.37E-01        | RBM22    | 8     | s10094725 | 62798716 | 2.87E-01           | ASPH      | -             | 2.85E-08 | 2.23E-01 | 7.83E-07 | 228                             |  |
| 2     | rs11898850 | 73053127 | 9.44E-01        | SFXN5    | 11    | rs340936  | 22444915 | 4.47E-01           | N/A       | -             | 2.86E-08 | 7.61E-01 | 2.53E-05 | 229                             |  |
| 2     | rs12622589 | 45072318 | 7.61E-02        | SIX2     | 2     | rs6740621 | 2.35E+08 | 7.12E-01           | ARL4C     | -             | 2.87E-08 | 3.43E-01 | 2.68E-07 | 230                             |  |
| 5     | rs1363292  | 92207389 | 5.85E-01        | N/A      | 11    | s11042978 | 2154994  | 3.22E-01           | N/A       | -             | 2.88E-08 | 1.65E-01 | 2.11E-04 | 231                             |  |
| 3     | rs7651855  | 1.62E+08 | 4.74E-01        | ARL14    | 20    | rs858140  | 24009345 | 2.02E-01           | N/A       | -             | 2.89E-08 | 9.13E-01 | 9.24E-06 | 232                             |  |
| 5     | rs3903000  | 52208612 | 8.96E-01        | N/A      | 22    | rs2142831 | 41131396 | 2.54E-01           | NFAM1     | -             | 2.92E-08 | 5.77E-01 | 2.31E-06 | 233                             |  |
| 12    | rs12184484 | 96036626 | 3.87E-01        | N/A      | 19    | rs2334253 | 50808317 | 2.61E-01           | N/A       | -             | 2.93E-08 | 5.54E-01 | 1.36E-05 | 234                             |  |
| 12    | rs17751083 | 96037531 | 3.87E-01        | N/A      | 19    | rs2334253 | 50808317 | 2.61E-01           | N/A       | -             | 2.93E-08 | 5.54E-01 | 1.36E-05 | 235                             |  |
| 8     | rs2341797  | 29387170 | 6.22E-01        | N/A      | 11    | s10500862 | 19821432 | 7.09E-01           | N/AV2     | -             | 2.93E-08 | 2.41E-01 | 2.39E-07 | 236                             |  |
| 2     | rs4669572  | 10392759 | 5.05E-02        | HPCAL1   | 11    | rs793272  | 19204188 | 4.66E-01           | E2F8      | -             | 2.93E-08 | 3.29E-01 | 1.39E-04 | 237                             |  |
| 12    | rs1872521  | 1.27E+08 | 8.77E-01        | N/A      | 22    | rs1557540 | 35062483 | 3.50E-01           | MYH9      | -             | 2.93E-08 | 3.57E-01 | 1.67E-06 | 238                             |  |
| 10    | rs11598564 | 1.03E+08 | 4.52E-02        | N/A      | 12    | rs3858666 | 22795317 | 8.86E-01           | N/A       | -             | 2.93E-08 | 4.30E-01 | 3.10E-06 | 239                             |  |
| 8     | rs352810   | 15666890 | 6.99E-01        | TUSC3    | 18    | rs8093852 | 68855454 | 1.39E-01           | N/A       | -             | 2.95E-08 | 5.62E-01 | 2.03E-06 | 240                             |  |
| 1     | rs10157812 | 98656129 | 2.35E-01        | N/A      | 9     | s17083205 | 82166375 | 1.33E-01           | N/A       | -             | 2.95E-08 | 3.24E-01 | 2.36E-06 | 241                             |  |
| 1     | rs7542173  | 98656811 | 2.35E-01        | N/A      | 9     | s17083205 | 82166375 | 1.33E-01           | N/A       | -             | 2.95E-08 | 3.24E-01 | 2.36E-06 | 242                             |  |
| 3     | rs7648359  | 1.36E+08 | 5.09E-01        | EPHB1    | 13    | rs9603097 | 36242187 | 6.41E-01           | N/A       | -             | 2.96E-08 | 5.22E-02 | 1.02E-07 | 243                             |  |
| 6     | rs4947296  | 31166157 | 4.31E-02        | N/A      | 6     | rs887464  | 31253899 | 8.59E-02           | TCF19     | MHC           | 2.96E-08 | 6.31E-01 | 1.46E-04 | 244                             |  |
| 5     | rs13183847 | 1.25E+08 | 6.50E-01        | N/A      | 12    | s10862213 | 79893973 | 2.43E-01           | N/A       | -             | 2.96E-08 | 8.83E-01 | 5.37E-05 | 245                             |  |
| 5     | rs131226   | 53363328 | 3.70E-01        | ARL15    | 17    | rs2305529 | 71213848 | 4.16E-01           | ITGB4     | -             | 2.97E-08 | 8.29E-01 | 3.06E-05 | 246                             |  |
| 6     | rs3094205  | 31199841 | 5.91E-01        | C6orf15  | 14    | rs2809121 | 97504272 | 2.57E-01           | C14orf64  | MHC           | 2.98E-08 | 1.08E-01 | 5.95E-08 | 247                             |  |
| 2     | rs1263595  | 2.08E+08 | 4.03E-01        | KLF7     | 17    | rs3764899 | 4669572  | 2.36E-01           | PLD2      | -             | 2.98E-08 | 1.18E-01 | 3.68E-03 | 248                             |  |
| 6     | rs512778   | 79401865 | 6.51E-02        | N/A      | 17    | rs8076949 | 23763267 | 2.71E-01           | SLC46A1   | -             | 2.99E-08 | 7.44E-01 | 7.27E-07 | 249                             |  |
| 7     | rs509834   | 70775938 | 3.81E-01        | WBCSCR17 | 10    | rs946028  | 8388335  | 8.75E-01           | N/A       | -             | 3.02E-08 | 6.06E-01 | 5.64E-05 | 250                             |  |
| 12    | rs825090   | 1.01E+08 | 3.89E-01        | MYBPC1   | 14    | rs1958249 | 43362891 | 9.69E-02           | N/A       | -             | 3.03E-08 | 4.82E-01 | 4.69E-06 | 251                             |  |
| 13    | rs16801    | 37878738 | 5.64E-01        | N/A      | 18    | rs568080  | 32094999 | 5.37E-01           | MOCOS     | -             | 3.05E-08 | 9.43E-01 | 8.01E-05 | 252                             |  |
| 6     | rs887464   | 31253899 | 8.59E-02        | TCF19    | 6     | rs9368675 | 31380136 | 7.91E-01           | N/A       | MHC           | 3.07E-08 | 8.90E-01 | 1.41E-05 | 253                             |  |
| 7     | rs17367928 | 77934930 | 9.71E-01        | MAGI2    | 20    | s12625612 | 42279088 | 8.94E-01           | C20orf111 | -             | 3.07E-08 | 8.90E-01 | 1.41E-05 | 254                             |  |
| 7     | rs17367928 | 77934930 | 9.71E-01        | MAGI2    | 20    | rs4812799 | 42280108 | 8.94E-01           | C20orf111 | -             | 3.07E-08 | 1.91E-01 | 5.58E-07 | 255                             |  |
| 1     | rs4140432  | 1.85E+08 | 6.49E-01        | N/A      | 5     | rs7715102 | 2427305  | 5.42E-01           | N/A       | -             | 3.07E-08 | 1.99E-01 | 3.89E-07 | 256                             |  |
| 5     | rs33376    | 1.71E+08 | 8.11E-01        | N/A      | 21    | rs7275493 | 16971867 | 9.00E-01           | N/A       | -             | 3.08E-08 | 6.14E-01 | 5.26E-05 | 257                             |  |
| 8     | rs1598294  | 15675662 | 7.57E-01        | TUSC3    | 18    | rs2432842 | 68860542 | 1.84E-01           | N/A       | -             | 3.10E-08 | 2.87E-01 | 4.48E-07 | 258                             |  |
| 3     | rs1871493  | 1.42E+08 | 8.68E-01        | CLSTN2   | 5     | s17692371 | 1.29E+08 | 9.90E-01           | CHSY3     | -             | 3.12E-08 | 8.59E-01 | 1.86E-05 | 259                             |  |
| 1     | rs10889978 | 41634712 | 1.59E-01        | N/A      | 12    | rs1807783 | 93504732 | 5.57E-01           | TMCC3     | -             | 3.12E-08 | 6.27E-01 | 1.10E-04 | 260                             |  |
| 1     | rs578271   | 65277859 | 8.36E-01        | MIR101-1 | 10    | rs4748702 | 21053851 | 8.02E-01           | N/A       | -             | 3.12E-08 | 7.42E-01 | 3.90E-06 | 261                             |  |
| 4     | rs2980089  | 4318199  | 8.86E-01        | LYAR     | 5     | s13166683 | 1.21E+08 | 7.34E-01           | N/A       | -             | 3.15E-08 | 4.47E-01 | 2.09E-06 | 262                             |  |
| 6     | rs7774522  | 1.23E+08 | 6.95E-02        | CLVS2    | 1     | s17596572 | 1.5E+08  | 1.20E-01           | HRNR      | -             | 3.17E-08 | 2.86E-01 | 1.06E-04 | 263                             |  |
| 1     | rs2686228  | 2.39E+08 | 9.03E-01        | RGS7     | 12    | rs4765461 | 1.26E+08 | 8.78E-02           | N/A       | -             | 3.18E-08 | 5.89E-01 | 7.72E-05 | 264                             |  |
| 5     | rs4921132  | 1.6E+08  | 8.00E-02        | C1QTNF2  | 7     | rs7801392 | 1.42E+08 | 9.06E-01           | MOXD2     | -             | 3.19E-08 | 6.84E-01 | 1.02E-05 | 265                             |  |
| 3     | rs2611623  | 1.89E+08 | 1.80E-01        | N/A      | 8     | rs7460495 | 59596784 | 7.15E-01           | N/A       | -             | 3.20E-08 | 8.19E-01 | 6.71E-07 | 266                             |  |
| 12    | rs1872521  | 1.27E+08 | 8.77E-01        | N/A      | 22    | rs6000239 | 35045975 | 3.04E-01           | MYH9      | -             | 3.22E-08 | 4.47E-01 | 2.82E-06 | 267                             |  |
| 2     | rs10167584 | 82185384 | 2.12E-02        | N/A      | 17    | rs7211963 | 72208041 | 5.06E-01           | JMJD6     | -             | 3.24E-08 | 3.54E-01 | 9.53E-05 | 268                             |  |
| 5     | rs4457046  | 1.06E+08 | 5.53E-02        | N/A      | 12    | rs4763075 | 61962124 | 4.02E-01           | N/A       | -             | 3.27E-08 | 6.99E-01 | 1.56E-05 | 269                             |  |
| 1     | rs1804506  | 91920601 | 5.28E-01        | N/A      | 1     | s12405465 | 2.25E+08 | 7.98E-02           | PSEN2     | -             | 3.28E-08 | 9.21E-01 | 2.09E-05 | 270                             |  |
| 1     | rs9287077  | 1.65E+08 | 8.02E-01        | GPA33    | 12    | rs922380  | 75600329 | 7.23E-01           | N/A       | -             | 3.28E-08 | 1.32E-01 | 2.17E-04 | 271                             |  |
| 2     | rs1402774  | 82195241 | 2.08E-02        | N/A      | 17    | rs7211963 | 72208041 | 5.06E-01           | JMJD6     | -             | 3.30E-08 | 3.54E-01 | 9.67E-05 | 272                             |  |
| 6     | rs9399364  | 1.42E+08 | 3.94E-01        | N/A      | 10    | rs1904382 | 65220692 | 1.59E-01           | N/A       | -             | 3.32E-08 | 8.32E-03 | 4.94E-09 | 273                             |  |
| 6     | rs9403288  | 1.42E+08 | 3.94E-01        | N/A      | 10    | rs1904382 | 65220692 | 1.59E-01           | N/A       | -             | 3.32E-08 | 8.32E-03 | 4.94E-09 | 274                             |  |
| 2     | rs12714081 | 82144466 | 1.29E-02        | N/A      | 17    | rs7211963 | 72208041 | 5.06E-01           | JMJD6     | -             | 3.32E-08 | 5.89E-01 | 4.23E-05 | 275                             |  |
| 1     | rs2996016  | 41633970 | 2.03E-01        | N/A      | 12    | rs1807783 | 93504732 | 5.57E-01           | TMCC3     | -             | 3.34E-08 | 7.75E-01 | 7.59E-05 | 276                             |  |
| 3     | rs7648359  | 1.36E+08 | 5.09E-01        | EPHB1    | 13    | s10507442 | 36245848 | 6.87E-01           | N/A       | -             | 3.36E-08 | 5.98E-01 | 1.74E-04 | 277                             |  |
| 6     | rs2395471  | 31348671 | 7.52E-01        | HLA-C    | 6     | rs2253907 | 31444849 | 7.98E-01           | HLA-B     | MHC           | 3.36E-08 | 6.25E-02 | 1.08E-07 | 278                             |  |
| 6     | rs9396677  | 16574200 | 5.82E-02        | ATXN1    | 8     | rs4871101 | 1.22E+08 | 1.17E-01           | SNTB1     | -             | 3.37E-08 | 2.35E-01 | 7.20E-05 | 279                             |  |
| 1     | rs6662401  | 1.67E+08 | 7.53E-01        | XCL1     | 22    | rs2294209 | 30970057 | 6.97E-01           | SLC54A    | -             | 3.37E-08 | 4.10E-01 | 9.48E-07 | 280                             |  |
| 2     | rs12471723 | 2.19E+08 | 7.72E-02        | IL8RBP   | 13    | rs1164502 | 75766685 | 6.62E-01           | N/A       | -             | 3.38E-08 | 6.58E-01 | 3.40E-06 | 281                             |  |
| 6     | rs9380215  | 31157634 | 4.29E-02        | N/A      | 6     | rs887464  | 31253899 | 8.59E-02           | TCF19     | MHC           | 3.39E-08 | 5.24E-01 | 2.73E-06 | 282                             |  |
| 1     | rs11799843 | 1.85E+08 | 2.96E-01        | MIR548F1 | 5     | rs7715102 | 2427305  | 5.42E-01           | N/A       | -             | 3.39E-08 | 5.24E-01 | 2.73E-06 | 283                             |  |
| 1     | rs3817586  | 1.85E+08 | 2.96E-01        | MIR548F1 | 5     | rs7715102 | 2427305  | 5.42E-01           | N/A       | -             | 3.39E-08 | 5.24E-01 | 2.73E-06 | 284                             |  |
| 1     | rs1886690  | 39058140 | 5.37E-01        | RRAGC    | 15    | s12904751 | 52772402 | 8.03E-02           | N/A       | -             | 3.40E-08 | 9.10E-01 | 1.74E-05 | 285                             |  |
| 1     | rs7541537  | 2.37E+08 | 8.14E-01        | N/A      | 3     | rs33036   | 1.61E+08 | 9.89E-01           | SCHIP1    | -             | 3.41E-08 | 9.84E-01 | 2.01E-05 | 286                             |  |
| 1     | rs16858460 | 1.65E+08 | 8.22E-01        | DUSP27   | 12    | rs922380  | 75600329 | 7.23E-01           | N/A       | -             | 3.42E-08 | 1.02E-01 | 2.84E-04 | 287                             |  |
| 8     | rs1002905  | 64020514 | 7.19E-01        | NKAIN3   | 10    | rs7091494 | 14887155 | 9.95E-01           | CDNF      | -             | 3.43E-08 | 4.97E-01 | 4.15E-06 | 288                             |  |
| 10    | rs7903921  | 1.32E+08 | 8.20E-01        | N/A      | 15    | rs8030479 | 97712007 | 6.31E-01           | LRRC28    | -             | 3.48E-08 | 4.88E-01 | 6.91E-06 | 289                             |  |
| 2     | rs1405193  | 1.85E+08 | 6.01E-01        | N/A      | 18    | rs955427  | 57041053 | 6.97E-01           | N/A       | -             | 3.50E-08 | 3.13E-02 | 2.48E-08 | 290                             |  |
| 2     | rs7561814  | 1.69E+08 | 1.94E-01        | N/A      | 12    | s10877902 | 61330448 | 8.81E-01           | PPM1H     | -             | 3.51E-08 | 1.07E-01 | 7.08E-08 | 291                             |  |
| 6     | rs1062470  | 31192414 | 5.89E-01        | C6orf15  | 14    | rs2809121 | 97504272 | 2.57E-01           | C14orf64  | MHC           | 3.51E-08 | 7.21E-01 | 2.45E-04 | 292                             |  |
| 3     | rs4684717  | 10598391 | 7.53E-01        | N/A      | 14    | rs1983521 | 21688320 | 9.27E-02           | N/A       | -             | 3.51E-08 | 7.94E-01 | 3.54E-05 | 293                             |  |
| 6     | rs3130559  | 31205280 | 7.50E-01        | C6orf15  | 6     | rs1131896 | 31487094 | 3.40E-01           | MICA      | MHC           | 3.55E-08 | 4.24E-01 | 3.46E-06 | 294                             |  |
| 1     |            |          |                 |          |       |           |          |                    |           |               |          |          |          |                                 |  |

| SNP A |            |          |                 |         | SNP B |            |          |                    |          | Interaction P |          |          | Ranking  | Cluster in top 100 interactions |
|-------|------------|----------|-----------------|---------|-------|------------|----------|--------------------|----------|---------------|----------|----------|----------|---------------------------------|
| CHR   | SNP        | Location | gle locus P val | Gene    | CHR   | SNP        | Location | single locus P val | Gene     | MHC region    | Stage 1  | Stage 2  | Combined |                                 |
| 3     | rs7630274  | 20693128 | 3.67E-01        | N/A     | 10    | rs2300433  | 1.24E+08 | 4.84E-01           | HTRA1    | -             | 4.06E-08 | 2.95E-01 | 6.45E-04 | 335                             |
| 8     | rs2648883  | 1.29E+08 | 8.39E-01        | PVT1    | 11    | s11236552  | 75222813 | 1.91E-01           | UVRAG    | -             | 4.07E-08 | 7.35E-01 | 1.22E-04 | 336                             |
| 6     | rs3132571  | 31013292 | 2.35E-02        | DPCR1   | 6     | rs1265086  | 31217861 | 3.70E-01           | TCF19    | MHC           | 4.08E-08 | 2.95E-02 | 6.04E-08 | 337                             |
| 1     | rs474348   | 98683758 | 2.10E-01        | N/A     | 9     | rs17083205 | 82166375 | 1.33E-01           | N/A      | -             | 4.10E-08 | 3.83E-01 | 4.20E-06 | 338                             |
| 2     | rs16853057 | 1.68E+08 | 5.73E-01        | XIRP2   | 19    | rs889362   | 18619255 | 5.85E-02           | KLHL26   | -             | 4.11E-08 | 3.91E-01 | 2.28E-05 | 339                             |
| 12    | rs825090   | 1.01E+08 | 3.89E-01        | MYBPC1  | 14    | rs2182977  | 43348830 | 1.33E-01           | N/A      | -             | 4.16E-08 | 6.57E-01 | 7.70E-06 | 340                             |
| 6     | rs3805994  | 70823225 | 2.48E-01        | COL19A1 | 8     | rs2242093  | 1.45E+08 | 1.98E-02           | ZC3H3    | -             | 4.16E-08 | 5.85E-01 | 1.56E-05 | 341                             |
| 7     | rs2280659  | 1.54E+08 | 4.99E-01        | DPP6    | 8     | rs4841005  | 8538640  | 4.39E-01           | N/A      | -             | 4.17E-08 | 3.16E-01 | 6.18E-07 | 342                             |
| 1     | rs10889403 | 63334538 | 9.86E-01        | N/A     | 11    | s11041391  | 7432637  | 6.55E-01           | SYT9     | -             | 4.17E-08 | 8.42E-01 | 2.21E-06 | 343                             |
| 6     | rs3805994  | 70823225 | 2.48E-01        | COL19A1 | 8     | s12679598  | 1.45E+08 | 1.98E-02           | ZC3H3    | -             | 4.18E-08 | 6.16E-01 | 1.36E-05 | 344                             |
| 9     | rs10819907 | 97938109 | 8.46E-01        | N/A     | 12    | rs1196836  | 1.04E+08 | 3.24E-01           | KIAA1033 | -             | 4.18E-08 | 6.35E-01 | 8.92E-05 | 345                             |
| 6     | rs2233965  | 31188878 | 4.20E-03        | C6orf15 | 6     | rs887464   | 31253899 | 8.59E-02           | TCF19    | MHC           | 4.19E-08 | 4.64E-01 | 3.47E-06 | 346                             |
| 3     | rs762308   | 37740699 | 1.26E-02        | ITGA9   | 4     | rs2881015  | 1.1E+08  | 5.34E-01           | COL25A1  | -             | 4.19E-08 | 2.01E-01 | 2.52E-06 | 347                             |
| 5     | rs12523655 | 1.7E+08  | 5.99E-01        | KCNIP1  | 7     | rs6958788  | 1.28E+08 | 8.77E-01           | FAM71F2  | -             | 4.21E-08 | 3.79E-01 | 2.50E-06 | 348                             |
| 6     | rs6937783  | 1.06E+08 | 8.02E-01        | N/A     | 2     | s11682423  | 1.63E+08 | 7.51E-03           | KCNH7    | -             | 4.21E-08 | 2.97E-01 | 3.06E-06 | 349                             |
| 1     | rs2686228  | 2.39E+08 | 9.03E-01        | RGS7    | 12    | s12228054  | 1.26E+08 | 7.53E-02           | N/A      | -             | 4.22E-08 | 5.89E-01 | 9.15E-05 | 350                             |
| 1     | rs1268910  | 2.13E+08 | 3.18E-01        | N/A     | 5     | rs4320273  | 31072368 | 6.09E-05           | N/A      | -             | 4.22E-08 | 4.76E-01 | 1.17E-05 | 351                             |
| 2     | rs12994560 | 75658556 | 9.34E-01        | FAM176A | 8     | s11990002  | 79263139 | 1.94E-01           | N/A      | -             | 4.22E-08 | 6.80E-01 | 3.15E-05 | 352                             |
| 1     | rs2249665  | 47459671 | 9.73E-01        | TAL1    | 15    | rs1579821  | 20501269 | 8.54E-01           | CYFIP1   | -             | 4.23E-08 | 4.22E-01 | 2.62E-05 | 353                             |
| 6     | rs2237236  | 26559532 | 9.88E-01        | BTN3A3  | 15    | rs813299   | 29225595 | 8.06E-01           | N/A      | MHC           | 4.24E-08 | 7.83E-01 | 3.34E-06 | 354                             |
| 1     | rs16860429 | 1.81E+08 | 6.09E-01        | LAMC2   | 11    | s10835051  | 26653876 | 2.24E-01           | SLC5A12  | -             | 4.24E-08 | 1.17E-01 | 7.75E-04 | 355                             |
| 11    | rs1371351  | 96030639 | 6.33E-01        | N/A     | 11    | rs9633935  | 1.08E+08 | 4.46E-01           | N/A      | -             | 4.24E-08 | N/A      | N/A      | 356                             |
| 12    | rs11063703 | 5459670  | 1.77E-01        | NTF3    | 13    | rs9558979  | 1.07E+08 | 7.09E-01           | FAM155A  | -             | 4.25E-08 | 6.29E-01 | 2.24E-06 | 357                             |
| 19    | rs919803   | 35678944 | 1.57E-01        | ZNF536  | 22    | rs1024338  | 47919286 | 7.26E-02           | N/A      | -             | 4.26E-08 | 6.16E-01 | 5.82E-06 | 358                             |
| 4     | rs4698742  | 14085628 | 5.31E-01        | N/A     | 8     | rs2978010  | 1.35E+08 | 8.56E-01           | ST3GAL1  | -             | 4.26E-08 | 1.04E-01 | 1.18E-07 | 359                             |
| 2     | rs6712787  | 2.21E+08 | 4.12E-01        | N/A     | 5     | s10155508  | 1.36E+08 | 2.98E-01           | N/A      | -             | 4.27E-08 | 4.83E-01 | 4.26E-06 | 360                             |
| 2     | rs7599725  | 2.21E+08 | 4.12E-01        | N/A     | 5     | s10155508  | 1.36E+08 | 2.98E-01           | N/A      | -             | 4.27E-08 | 4.83E-01 | 4.26E-06 | 361                             |
| 9     | rs7025588  | 1.39E+08 | 9.67E-01        | N/A     | 10    | s11253225  | 5590202  | 6.02E-01           | N/A      | -             | 4.30E-08 | 2.19E-01 | 1.02E-06 | 362                             |
| 6     | rs3130534  | 31317024 | 3.50E-01        | N/A     | 6     | rs7761965  | 31381474 | 9.15E-01           | N/A      | MHC           | 4.30E-08 | N/A      | N/A      | 363                             |
| 2     | rs12694536 | 2.21E+08 | 4.14E-01        | N/A     | 5     | s10155508  | 1.36E+08 | 2.98E-01           | N/A      | -             | 4.31E-08 | 5.38E-01 | 6.70E-06 | 364                             |
| 3     | rs2724693  | 1.39E+08 | 3.64E-01        | N/A     | 8     | rs904924   | 96599824 | 2.18E-01           | N/A      | -             | 4.31E-08 | 3.07E-01 | 5.37E-04 | 365                             |
| 7     | rs599574   | 70776464 | 3.50E-01        | WBSR17  | 10    | rs7896001  | 8397305  | 6.35E-01           | N/A      | -             | 4.33E-08 | 4.63E-01 | 9.51E-05 | 366                             |
| 7     | rs599574   | 70776464 | 3.50E-01        | WBSR17  | 10    | rs1892064  | 8401217  | 6.35E-01           | N/A      | -             | 4.33E-08 | 5.52E-01 | 7.02E-05 | 367                             |
| 12    | rs12424340 | 96130353 | 3.48E-02        | N/A     | 19    | rs2334253  | 50808317 | 2.61E-01           | N/A      | -             | 4.35E-08 | 8.43E-01 | 1.73E-06 | 368                             |
| 5     | rs10059955 | 1.05E+08 | 1.38E-01        | N/A     | 12    | s12824017  | 61935103 | 2.85E-01           | N/A      | -             | 4.37E-08 | 6.54E-01 | 1.21E-05 | 369                             |
| 6     | rs3777932  | 1.13E+08 | 4.82E-02        | LAMA4   | 14    | rs2798819  | 94492794 | 9.86E-01           | N/A      | -             | 4.40E-08 | 6.05E-01 | 3.20E-06 | 370                             |
| 6     | rs3798221  | 1.61E+08 | 6.44E-01        | LPA     | 7     | s10951991  | 6688186  | 5.78E-01           | ZNF12    | -             | 4.41E-08 | 2.00E-01 | 3.30E-07 | 371                             |
| 3     | rs6781052  | 4576969  | 1.34E-01        | ITPR1   | 3     | rs2324938  | 86096826 | 5.01E-01           | CADM2    | -             | 4.42E-08 | 4.21E-01 | 1.99E-06 | 372                             |
| 1     | rs2249636  | 47459120 | 5.73E-01        | TAL1    | 15    | rs1579821  | 20501269 | 8.54E-01           | CYFIP1   | -             | 4.46E-08 | 8.33E-01 | 4.45E-06 | 373                             |
| 6     | rs4122189  | 31275906 | 7.70E-02        | HCG27   | 6     | rs7750269  | 31379136 | 8.58E-01           | N/A      | MHC           | 4.48E-08 | 3.66E-01 | 2.58E-06 | 374                             |
| 1     | rs9287077  | 1.65E+08 | 8.02E-01        | GPA33   | 12    | rs2632226  | 75535673 | 3.99E-01           | N/A      | -             | 4.48E-08 | 5.52E-01 | 1.63E-05 | 375                             |
| 12    | rs1468894  | 96058471 | 6.16E-01        | N/A     | 19    | rs2334253  | 50808317 | 2.61E-01           | N/A      | -             | 4.48E-08 | 5.67E-01 | 1.97E-05 | 376                             |
| 17    | rs17247848 | 28008297 | 5.07E-01        | MYO1D   | 18    | rs3911593  | 46436326 | 7.35E-01           | MAPK4    | -             | 4.49E-08 | 3.76E-01 | 5.28E-04 | 377                             |
| 2     | rs12714081 | 82144466 | 1.29E-02        | N/A     | 17    | rs2240774  | 72222167 | 7.40E-01           | JMJD6    | -             | 4.49E-08 | 4.42E-01 | 1.33E-04 | 378                             |
| 10    | rs10764818 | 1.31E+08 | 6.80E-01        | N/A     | 15    | rs1558390  | 95320425 | 1.04E-01           | N/A      | -             | 4.50E-08 | 9.00E-01 | 2.58E-05 | 379                             |
| 3     | rs7632399  | 1.23E+08 | 5.33E-01        | CASR    | 10    | rs2589446  | 56634203 | 2.40E-01           | N/A      | -             | 4.51E-08 | 8.09E-01 | 2.19E-05 | 380                             |
| 1     | rs12042641 | 1.65E+08 | 5.58E-01        | GPA33   | 12    | rs922380   | 75600329 | 7.23E-01           | N/A      | -             | 4.52E-08 | 1.39E-01 | 2.51E-04 | 381                             |
| 9     | rs10819907 | 97938109 | 8.46E-01        | N/A     | 12    | rs1196865  | 1.04E+08 | 3.01E-01           | KIAA1033 | -             | 4.53E-08 | 6.35E-01 | 9.54E-05 | 382                             |
| 8     | rs4876860  | 1.2E+08  | 2.21E-01        | N/A     | 13    | rs2985947  | 45056322 | 2.08E-02           | FAM194B  | -             | 4.54E-08 | 6.28E-02 | 1.53E-03 | 383                             |
| 1     | rs3002307  | 2.13E+08 | 6.80E-01        | PTPN14  | 13    | s12584299  | 1.08E+08 | 7.00E-02           | N/A      | -             | 4.54E-08 | 6.30E-01 | 6.66E-05 | 384                             |
| 13    | rs7986907  | 78628865 | 9.19E-01        | N/A     | 15    | rs4886616  | 17187678 | 5.12E-01           | N/A      | -             | 4.55E-08 | 6.62E-01 | 4.25E-06 | 385                             |
| 8     | rs4841530  | 11326556 | 7.06E-01        | C8orf12 | 15    | s11247345  | 96851676 | 8.76E-01           | FAM169B  | -             | 4.56E-08 | 3.19E-01 | 4.00E-07 | 386                             |
| 6     | rs9404133  | 1.02E+08 | 3.61E-01        | GRIK2   | 5     | s16868534  | 34893202 | 1.12E-02           | TTC23L   | -             | 4.58E-08 | 9.39E-01 | 4.57E-06 | 387                             |
| 7     | rs10487781 | 14835730 | 4.38E-01        | DGKB    | 7     | s17154501  | 1.07E+08 | 8.30E-01           | N/A      | -             | 4.58E-08 | 2.35E-03 | 1.43E-09 | 388                             |
| 4     | rs7700133  | 1.86E+08 | 1.53E-02        | N/A     | 14    | rs179724   | 30553512 | 8.70E-01           | STRN3    | -             | 4.58E-08 | 7.39E-01 | 1.02E-05 | 389                             |
| 1     | rs10489397 | 1.85E+08 | 6.96E-01        | N/A     | 5     | rs7715102  | 2427305  | 4.52E-01           | N/A      | -             | 4.59E-08 | 2.92E-01 | 1.06E-06 | 390                             |
| 4     | rs10010758 | 37614913 | 9.45E-01        | TBC1D1  | 18    | rs8092807  | 3013264  | 3.23E-01           | LPIN2    | -             | 4.59E-08 | 6.69E-01 | 4.49E-06 | 391                             |
| 6     | rs1555772  | 1.22E+08 | 4.39E-01        | N/A     | 3     | rs524431   | 74383584 | 7.34E-01           | CNTN3    | -             | 4.60E-08 | 1.80E-02 | 3.12E-08 | 392                             |
| 8     | rs1077701  | 6457008  | 3.44E-01        | MCPH1   | 15    | rs6492914  | 37822048 | 4.15E-02           | FSIP1    | -             | 4.60E-08 | 5.26E-01 | 3.47E-04 | 393                             |
| 1     | rs950302   | 1.65E+08 | 5.93E-01        | DUSP27  | 12    | rs2669013  | 75547079 | 6.30E-01           | N/A      | -             | 4.60E-08 | N/A      | N/A      | 394                             |
| 4     | rs17040984 | 1.63E+08 | 9.50E-02        | FSTL5   | 8     | rs6586726  | 18144500 | 4.58E-01           | NAT1     | -             | 4.60E-08 | 2.52E-01 | 7.57E-07 | 395                             |
| 9     | rs2383022  | 17475598 | 2.76E-01        | CNTLN   | 12    | s10847411  | 1.27E+08 | 9.96E-01           | N/A      | -             | 4.61E-08 | 5.36E-01 | 1.92E-04 | 396                             |
| 8     | rs2648883  | 1.29E+08 | 8.39E-01        | PVT1    | 11    | s12280464  | 75246798 | 1.67E-01           | UVRAG    | -             | 4.63E-08 | 9.31E-01 | 9.31E-05 | 397                             |
| 6     | rs6923877  | 1.61E+08 | 5.49E-01        | LPA     | 7     | s10951991  | 6688186  | 5.78E-01           | ZNF12    | -             | 4.64E-08 | 2.00E-01 | 3.44E-07 | 398                             |
| 6     | rs9378310  | 1671161  | 4.51E-02        | GMDS    | 2     | s10209735  | 13290142 | 2.31E-01           | N/A      | -             | 4.64E-08 | 5.37E-01 | 2.07E-04 | 399                             |
| 6     | rs9378310  | 1671161  | 4.51E-02        | GMDS    | 2     | rs7573456  | 13292214 | 2.31E-01           | N/A      | -             | 4.64E-08 | 5.37E-01 | 2.07E-04 | 400                             |
| 5     | rs11134856 | 1.74E+08 | 3.40E-01        | N/A     | 9     | rs1331885  | 28332179 | 1.93E-02           | LINGO2   | -             | 4.64E-08 | 4.33E-01 | 2.95E-04 | 401                             |
| 1     | rs614448   | 1.17E+08 | 2.89E-01        | N/A     | 3     | rs4679208  | 1.27E+08 | 3.62E-01           | ALDH1L1  | -             | 4.67E-08 | 5.88E-01 | 1.47E-04 | 402                             |
| 6     | rs6456888  | 1.61E+08 | 6.19E-01        | LPA     | 7     | s10951991  | 6688186  | 5.78E-01           | ZNF12    | -             | 4.67E-08 | 2.00E-01 | 3.48E-07 | 403                             |
| 8     | rs16893262 | 87293814 | 1.58E-01        | SLC7A13 | 20    | rs1005351  | 7020555  | 8.94E-01           | N/A      | -             | 4.70E-08 | 2.77E-01 | 5.67E-04 | 404                             |
| 6     | rs1006012  | 53966408 | 8.93E-01        | N/A     | 1     | rs1188483  | 2.27E+08 | 3.41E-01           | TRIM17   | -             | 4.71E-08 | 8.88E-01 | 2.53E-05 | 405                             |
| 11    | rs508205   | 1.2E+08  | 4.93E-01        | N/A     | 22    | rs228918   | 35836626 | 9.71E-01           | TMPPSS6  | -             | 4.72E-08 | 2.94E-01 | 2.39E-04 | 406                             |
| 9     | rs7867457  | 78427138 | 6.15E-01        | PRUNE2  | 13    | rs1572371  | 19785860 | 4.76E-01           | N/A      | -             | 4.74E-08 | 6.79E-01 | 4.27E-06 | 407                             |
| 2     | rs17013592 | 77088275 | 7.17E-01        | LRRTM4  | 5     | rs597099   | 3192158  | 7.14E-01           | N/A      | -             | 4.75E-08 | 7.29E-01 | 3.00E-05 | 408                             |
| 2     | rs883844   | 1        |                 |         |       |            |          |                    |          |               |          |          |          |                                 |

| SNP A |            |          |                 |          | SNP B |            |          |                    |             | Interaction P |          |          | Ranking  | Cluster in top 100 interactions |  |
|-------|------------|----------|-----------------|----------|-------|------------|----------|--------------------|-------------|---------------|----------|----------|----------|---------------------------------|--|
| CHR   | SNP        | Location | gle locus P val | Gene     | CHR   | SNP        | Location | single locus P val | Gene        | MHC region    | Stage 1  | Stage 2  | Combined |                                 |  |
| 5     | rs12523655 | 1.7E+08  | 5.99E-01        | KCNIP1   | 7     | rs1109552  | 1.28E+08 | 8.96E-01           | FAM71F2     | -             | 4.93E-08 | 3.36E-01 | 2.19E-06 | 447                             |  |
| 9     | rs7044405  | 35860001 | 1.82E-01        | TMEM8B   | 14    | rs2144039  | 22799242 | 2.41E-01           | HOMEZ       | -             | 4.95E-08 | 6.29E-01 | 1.33E-04 | 448                             |  |
| 3     | rs7651261  | 1.83E+08 | 3.46E-01        | N/A      | 18    | rs273363   | 30848701 | 1.25E-02           | MAPRE2      | -             | 4.95E-08 | 8.17E-01 | 9.67E-06 | 449                             |  |
| 12    | rs4930767  | 5467642  | 2.06E-01        | NTF3     | 13    | rs9558979  | 1.07E+08 | 8.79E-01           | FAM155A     | -             | 4.96E-08 | 8.87E-01 | 5.80E-06 | 450                             |  |
| 11    | rs11820229 | 59959174 | 8.62E-01        | MSA41A   | 18    | rs920783   | 42152426 | 1.23E-01           | RNF165      | -             | 4.96E-08 | 3.24E-01 | 3.74E-07 | 451                             |  |
| 1     | rs2294723  | 1.7E+08  | 1.53E-01        | DNM3     | 7     | rs7799650  | 98683305 | 1.13E-02           | N/A         | -             | 4.97E-08 | 5.07E-01 | 7.54E-06 | 452                             |  |
| 1     | rs2294723  | 1.7E+08  | 1.53E-01        | DNM3     | 7     | rs4255064  | 98684620 | 1.13E-02           | N/A         | -             | 4.97E-08 | 5.09E-01 | 7.52E-06 | 453                             |  |
| 12    | rs10128762 | 72968165 | 7.81E-01        | N/A      | 21    | rs928250   | 17977401 | 4.43E-01           | N/A         | -             | 4.97E-08 | 5.70E-03 | 9.21E-08 | 454                             |  |
| 8     | rs12676446 | 18560492 | 3.77E-01        | PSD3     | 9     | rs1969944  | 1.12E+08 | 8.02E-01           | PALM2-AKAP2 | -             | 4.97E-08 | 5.24E-01 | 3.47E-06 | 455                             |  |
| 9     | rs4146797  | 11941983 | 7.65E-01        | N/A      | 22    | rs5992838  | 16644831 | 1.46E-01           | BID         | -             | 4.98E-08 | 7.79E-02 | 1.06E-07 | 456                             |  |
| 1     | rs1354221  | 2.15E+08 | 6.49E-01        | ESRRG    | 3     | rs2257056  | 9163615  | 6.52E-01           | SRGAP3      | -             | 5.00E-08 | 2.09E-01 | 5.23E-07 | 457                             |  |
| 13    | rs9512365  | 26218189 | 8.63E-01        | GPR12    | 22    | rs5993935  | 18600764 | 6.79E-01           | MIR1286     | -             | 5.02E-08 | 9.38E-01 | 2.25E-05 | 458                             |  |
| 11    | rs2186760  | 95730814 | 7.60E-01        | MAML2    | 15    | rs2573612  | 98271513 | 1.21E-01           | N/A         | -             | 5.04E-08 | 5.40E-01 | 8.95E-06 | 459                             |  |
| 9     | rs11791889 | 35850942 | 3.60E-01        | TMEM8B   | 14    | rs977870   | 22794987 | 1.31E-01           | HOMEZ       | -             | 5.04E-08 | N/A      | N/A      | 460                             |  |
| 5     | rs4700718  | 1.8E+08  | 3.35E-01        | RASGEF1C | 8     | rs13267425 | 1.02E+08 | 2.72E-02           | N/A         | -             | 5.04E-08 | 7.08E-01 | 3.02E-05 | 461                             |  |
| 4     | rs1433634  | 66440061 | 3.55E-01        | N/A      | 12    | rs16946571 | 1.15E+08 | 2.61E-01           | N/A         | -             | 5.05E-08 | 5.58E-01 | 5.27E-05 | 462                             |  |
| 4     | rs6551968  | 66433172 | 3.55E-01        | N/A      | 12    | rs16946571 | 1.15E+08 | 2.61E-01           | N/A         | -             | 5.05E-08 | 5.58E-01 | 5.27E-05 | 463                             |  |
| 2     | rs7566955  | 1.41E+08 | 1.25E-02        | N/A      | 12    | rs1087709  | 56963223 | 1.71E-01           | N/A         | -             | 5.05E-08 | 5.06E-01 | 1.84E-04 | 464                             |  |
| 7     | rs7806531  | 70661813 | 1.54E-01        | WBSR17   | 9     | rs2300932  | 1.23E+08 | 6.11E-01           | C5          | -             | 5.06E-08 | 3.49E-02 | 1.92E-08 | 465                             |  |
| 1     | rs1808806  | 1.18E+08 | 8.04E-01        | FAM46C   | 2     | rs820780   | 57756125 | 3.10E-01           | N/A         | -             | 5.06E-08 | 6.20E-01 | 4.23E-05 | 466                             |  |
| 12    | rs20508    | 96606718 | 5.71E-01        | N/A      | 15    | rs12594522 | 30855341 | 1.35E-01           | FMN1        | -             | 5.06E-08 | 3.35E-01 | 1.83E-06 | 467                             |  |
| 10    | rs7908946  | 1.28E+08 | 8.46E-01        | ADAM12   | 19    | rs1849003  | 21934101 | 6.55E-01           | ZNF208      | -             | 5.07E-08 | 2.63E-01 | 5.82E-04 | 468                             |  |
| 10    | rs4993019  | 1.33E+08 | 6.54E-01        | N/A      | 15    | rs1036003  | 31828733 | 9.82E-01           | RYR3        | -             | 5.07E-08 | 6.46E-01 | 5.88E-06 | 469                             |  |
| 10    | rs4993019  | 1.33E+08 | 6.54E-01        | N/A      | 15    | rs1278311  | 31829265 | 9.82E-01           | RYR3        | -             | 5.07E-08 | 6.46E-01 | 5.88E-06 | 470                             |  |
| 4     | rs17074371 | 1.84E+08 | 4.00E-01        | N/A      | 16    | rs12149621 | 80702549 | 1.52E-01           | HSD17B2     | -             | 5.07E-08 | 1.29E-01 | 3.72E-08 | 471                             |  |
| 17    | rs12450534 | 61762419 | 9.72E-01        | PRKCA    | 20    | rs6107832  | 655880   | 3.32E-01           | N/A         | -             | 5.08E-08 | 4.98E-01 | 1.50E-04 | 472                             |  |
| 2     | rs2298873  | 139366   | 8.05E-01        | TPO      | 17    | rs9898832  | 29926052 | 3.40E-01           | TMEM132E    | -             | 5.08E-08 | 9.44E-01 | 1.73E-05 | 473                             |  |
| 4     | rs11726511 | 24919158 | 5.11E-01        | ZCCHC4   | 9     | rs626713   | 1.35E+08 | 2.50E-01           | RALGDS      | -             | 5.10E-08 | 1.22E-01 | 4.79E-04 | 474                             |  |
| 1     | rs10903122 | 25176163 | 2.26E-01        | RUNX3    | 15    | rs12907348 | 46978032 | 9.33E-01           | SHC4        | -             | 5.11E-08 | 1.43E-01 | 4.93E-04 | 475                             |  |
| 1     | rs1609996  | 25174456 | 2.26E-01        | RUNX3    | 15    | rs12907348 | 46978032 | 9.33E-01           | SHC4        | -             | 5.11E-08 | 1.43E-01 | 4.93E-04 | 476                             |  |
| 1     | rs6673606  | 1.81E+08 | 6.15E-01        | LAMC2    | 11    | rs10835057 | 26653876 | 2.24E-01           | SLC5A12     | -             | 5.12E-08 | 8.58E-01 | 4.85E-06 | 477                             |  |
| 12    | rs11059460 | 1.27E+08 | 2.00E-01        | N/A      | 18    | rs1893523  | 41735073 | 3.29E-01           | KIAA1632    | -             | 5.13E-08 | 4.35E-01 | 2.40E-04 | 478                             |  |
| 2     | rs1470504  | 77076318 | 7.97E-01        | LRRTM4   | 5     | rs1038046  | 3198652  | 5.89E-01           | N/A         | -             | 5.13E-08 | 8.79E-01 | 5.38E-06 | 479                             |  |
| 5     | rs1030179  | 1.23E+08 | 6.89E-01        | N/A      | 10    | rs981155   | 58243244 | 1.71E-01           | N/A         | -             | 5.14E-08 | 3.68E-01 | 1.13E-04 | 480                             |  |
| 1     | rs2806403  | 58296573 | 4.23E-01        | DAB1     | 1     | rs155552   | 1.81E+08 | 6.99E-01           | RGSL1       | -             | 5.18E-08 | 2.60E-01 | 9.76E-04 | 481                             |  |
| 7     | rs10233816 | 17941651 | 6.54E-01        | SNX13    | 14    | rs734606   | 94272240 | 2.92E-01           | N/A         | -             | 5.20E-08 | 7.38E-01 | 6.98E-05 | 482                             |  |
| 7     | rs10233816 | 17941651 | 6.54E-01        | SNX13    | 14    | rs8006054  | 94273061 | 2.92E-01           | N/A         | -             | 5.20E-08 | 7.38E-01 | 6.98E-05 | 483                             |  |
| 3     | rs10514695 | 36283102 | 3.53E-01        | N/A      | 16    | rs6500892  | 6953116  | 9.44E-01           | A2BP1       | -             | 5.21E-08 | 3.45E-01 | 2.15E-06 | 484                             |  |
| 1     | rs6683416  | 1.85E+08 | 7.18E-01        | PLA2G4A  | 18    | rs2023096  | 69807945 | 3.84E-01           | N/A         | -             | 5.21E-08 | 4.93E-01 | 1.53E-06 | 485                             |  |
| 1     | rs1832787  | 18499504 | 2.02E-01        | IGSF21   | 3     | rs1440512  | 29707866 | 7.32E-01           | N/A         | -             | 5.22E-08 | 6.78E-01 | 7.34E-06 | 486                             |  |
| 6     | rs1796520  | 26518779 | 8.92E-01        | BTN3A1   | 15    | rs1378847  | 29234640 | 5.84E-01           | N/A         | MHC           | 5.23E-08 | 7.06E-01 | 6.45E-06 | 487                             |  |
| 18    | rs12961809 | 55117108 | 8.71E-01        | CPXL4    | 20    | rs6061396  | 59971956 | 8.75E-01           | TAF4        | -             | 5.23E-08 | 3.34E-01 | 1.45E-04 | 488                             |  |
| 2     | rs1346722  | 1.68E+08 | 6.75E-01        | XIRP2    | 19    | rs889363   | 18622276 | 1.44E-01           | KLHL26      | -             | 5.24E-08 | 6.98E-02 | 5.07E-04 | 489                             |  |
| 6     | rs9480096  | 1.51E+08 | 4.85E-01        | PPP1R14C | 5     | rs880944   | 53827131 | 1.23E-01           | N/A         | -             | 5.24E-08 | 6.08E-01 | 5.28E-07 | 490                             |  |
| 2     | rs2894593  | 2.27E+08 | 3.87E-01        | N/A      | 5     | rs6885825  | 31215851 | 8.70E-01           | N/A         | -             | 5.28E-08 | 9.91E-01 | 8.15E-06 | 491                             |  |
| 7     | rs10215210 | 88206842 | 9.61E-01        | ZNF804B  | 13    | rs9508666  | 29645725 | 5.46E-01           | N/A         | -             | 5.29E-08 | N/A      | N/A      | 492                             |  |
| 5     | rs4704506  | 77690583 | 5.04E-01        | SCAMP1   | 11    | rs826044   | 73445145 | 5.08E-01           | C2CD3       | -             | 5.30E-08 | 7.49E-01 | 9.41E-06 | 493                             |  |
| 4     | rs1105912  | 25677116 | 7.90E-01        | N/A      | 9     | rs10992658 | 94958464 | 6.02E-01           | N/A         | -             | 5.30E-08 | 6.52E-01 | 6.68E-06 | 494                             |  |
| 5     | rs3816325  | 34718524 | 2.08E-01        | RAI14    | 16    | rs11646351 | 5473293  | 4.19E-01           | N/A         | -             | 5.30E-08 | 6.93E-01 | 1.89E-05 | 495                             |  |
| 2     | rs4505564  | 2.41E+08 | 3.55E-01        | N/A      | 7     | rs12718545 | 51777395 | 2.99E-01           | N/A         | -             | 5.31E-08 | 2.14E-01 | 1.41E-06 | 496                             |  |
| 1     | rs12567677 | 2.39E+08 | 6.75E-01        | RG57     | 11    | rs2640738  | 1.08E+08 | 8.73E-01           | EXPH5       | -             | 5.31E-08 | 4.88E-01 | 1.25E-06 | 497                             |  |
| 11    | rs1378357  | 11758937 | 8.32E-02        | N/A      | 12    | rs17107601 | 68731117 | 7.94E-01           | N/A         | -             | 5.32E-08 | 6.13E-01 | 1.35E-05 | 498                             |  |
| 8     | rs2648883  | 1.29E+08 | 8.39E-01        | PVT1     | 11    | rs10219335 | 75162498 | 1.45E-01           | DGAT2       | -             | 5.33E-08 | 7.60E-01 | 1.40E-04 | 499                             |  |
| 6     | rs2636597  | 1.34E+08 | 1.99E-01        | N/A      | 13    | rs1159278  | 96883350 | 9.56E-01           | RAP2A       | -             | 5.33E-08 | 8.51E-01 | 4.12E-05 | 500                             |  |
| 5     | rs11749226 | 53989021 | 4.52E-01        | N/A      | 9     | rs1326930  | 86275002 | 2.61E-01           | N/A         | -             | 5.35E-08 | 1.63E-01 | 1.90E-04 | 501                             |  |
| 2     | rs6760087  | 2.05E+08 | 8.79E-01        | PARD3B   | 19    | rs4807863  | 6257971  | 8.37E-02           | ACER1       | -             | 5.36E-08 | 1.19E-01 | 6.88E-07 | 502                             |  |
| 8     | rs7825721  | 82397176 | 2.99E-01        | N/A      | 8     | rs2218609  | 94224423 | 5.53E-01           | N/A         | -             | 5.36E-08 | N/A      | N/A      | 503                             |  |
| 8     | rs7841723  | 82397098 | 2.99E-01        | N/A      | 8     | rs2218609  | 94224423 | 5.53E-01           | N/A         | -             | 5.36E-08 | N/A      | N/A      | 504                             |  |
| 2     | rs12471133 | 1.56E+08 | 6.61E-01        | N/A      | 4     | rs4692256  | 27353816 | 7.45E-01           | N/A         | -             | 5.36E-08 | 1.21E-01 | 3.36E-03 | 505                             |  |
| 6     | rs4947172  | 1.13E+08 | 4.19E-02        | LAMA4    | 14    | rs2798819  | 94492794 | 9.86E-01           | N/A         | -             | 5.37E-08 | 4.44E-01 | 1.94E-06 | 506                             |  |
| 6     | rs6937889  | 6704016  | 9.78E-01        | N/A      | 14    | rs1159198  | 75937134 | 4.39E-02           | ESRRB       | -             | 5.38E-08 | N/A      | N/A      | 507                             |  |
| 5     | rs4704506  | 77690583 | 5.04E-01        | SCAMP1   | 11    | rs1800849  | 73397813 | 6.34E-01           | UCP3        | -             | 5.38E-08 | 7.44E-01 | 7.68E-06 | 508                             |  |
| 10    | rs4917420  | 1.06E+08 | 2.66E-01        | N/A      | 12    | rs1169821  | 50062992 | 6.53E-01           | GALNT6      | -             | 5.38E-08 | 2.82E-02 | 5.91E-08 | 509                             |  |
| 2     | rs13390436 | 25524281 | 2.01E-01        | DTNB     | 3     | rs1092103  | 1.46E+08 | 1.72E-01           | N/A         | -             | 5.38E-08 | 3.50E-01 | 8.78E-04 | 510                             |  |
| 3     | rs7632399  | 1.23E+08 | 5.33E-01        | CASR     | 10    | rs2120763  | 56645255 | 3.94E-01           | N/A         | -             | 5.39E-08 | 9.09E-01 | 1.99E-05 | 511                             |  |
| 3     | rs7632399  | 1.23E+08 | 5.33E-01        | CASR     | 10    | rs2680327  | 56663822 | 3.94E-01           | N/A         | -             | 5.39E-08 | 9.13E-01 | 2.00E-05 | 512                             |  |
| 6     | rs9355586  | 1.67E+08 | 6.60E-01        | RPS6KA2  | 12    | rs406117   | 91323127 | 2.14E-01           | CLU1        | -             | 5.40E-08 | 2.64E-01 | 3.48E-04 | 513                             |  |
| 1     | rs633995   | 1.7E+08  | 6.98E-01        | DNM3     | 7     | rs1360817  | 1938864  | 3.21E-01           | N/A         | -             | 5.40E-08 | 3.66E-02 | 7.91E-03 | 514                             |  |
| 5     | rs2089192  | 1.7E+08  | 5.56E-01        | KCNIP1   | 7     | rs6958788  | 1.28E+08 | 8.77E-01           | FAM71F2     | -             | 5.46E-08 | 3.61E-01 | 2.55E-06 | 515                             |  |
| 3     | rs1225047  | 1.33E+08 | 1.58E-01        | CPNE4    | 19    | rs8108738  | 18116359 | 3.36E-01           | MAST3       | -             | 5.49E-08 | 2.67E-01 | 6.93E-04 | 516                             |  |
| 9     | rs10819907 | 97938109 | 8.46E-01        | N/A      | 12    | rs1196814  | 1.04E+08 | 2.67E-01           | KIAA1033    | -             | 5.50E-08 | 6.35E-01 | 1.07E-04 | 517                             |  |
| 8     | rs2648883  | 1.29E+08 | 8.39E-01        | PVT1     | 11    | rs1458836  | 75202444 | 1.68E-01           | DGAT2       | -             | 5.52E-08 | 7.35E-01 | 1.43E-04 | 518                             |  |
| 8     | rs17222409 | 13430193 | 3               |          |       |            |          |                    |             |               |          |          |          |                                 |  |

| SNP A |            |          |                |          | SNP B |            |          |                     |           | MHC region | Interaction P |          |          | Ranking | Cluster in top 100 interactions |
|-------|------------|----------|----------------|----------|-------|------------|----------|---------------------|-----------|------------|---------------|----------|----------|---------|---------------------------------|
| CHR   | SNP        | Location | gle locus P va | Gene     | CHR   | SNP        | Location | single locus P valu | Gene      |            | Stage 1       | Stage 2  | Combined |         |                                 |
| 3     | rs9290235  | 1.66E+08 | 1.91E-01       | N/A      | 17    | rs1867295  | 50109062 | 8.79E-01            | N/A       | -          | 5.99E-08      | 1.42E-01 | 6.55E-04 | 559     |                                 |
| 4     | rs2132834  | 91787002 | 9.39E-01       | FAM190A  | 17    | rs8081176  | 75898582 | 3.89E-01            | RNF213    | -          | 6.01E-08      | 1.58E-01 | 4.43E-07 | 560     |                                 |
| 2     | rs12615696 | 4940344  | 5.19E-01       | N/A      | 5     | rs672413   | 78313985 | 6.12E-01            | ARSB      | -          | 6.01E-08      | 1.08E-01 | 1.53E-07 | 561     |                                 |
| 2     | rs4144195  | 4935064  | 5.19E-01       | N/A      | 5     | rs672413   | 78313985 | 6.12E-01            | ARSB      | -          | 6.01E-08      | 1.08E-01 | 1.53E-07 | 562     |                                 |
| 2     | rs6712088  | 4935287  | 5.19E-01       | N/A      | 5     | rs672413   | 78313985 | 6.12E-01            | ARSB      | -          | 6.01E-08      | 1.08E-01 | 1.53E-07 | 563     |                                 |
| 10    | rs1907336  | 77824762 | 6.70E-01       | C10orf11 | 11    | rs670342   | 78329325 | 9.25E-01            | ODZ4      | -          | 6.03E-08      | N/A      | N/A      | 564     |                                 |
| 6     | rs3130473  | 31307187 | 2.29E-01       | N/A      | 6     | rs3130534  | 31317024 | 3.50E-01            | N/A       | MHC        | 6.03E-08      | 8.63E-01 | 6.93E-05 | 565     |                                 |
| 1     | rs4659904  | 2.37E+08 | 7.64E-01       | N/A      | 3     | rs33036    | 1.61E+08 | 9.89E-01            | SCHIP1    | -          | 6.07E-08      | 9.84E-01 | 2.89E-05 | 566     |                                 |
| 2     | rs13384421 | 2.32E+08 | 2.35E-02       | C2orf57  | 13    | rs9534563  | 46656237 | 5.59E-01            | N/A       | -          | 6.09E-08      | 9.00E-01 | 1.16E-05 | 567     |                                 |
| 7     | rs6460519  | 68551289 | 6.83E-01       | N/A      | 13    | rs342594   | 59176565 | 9.16E-01            | DIAPH3    | -          | 6.10E-08      | 5.36E-01 | 7.23E-06 | 568     |                                 |
| 2     | rs1463990  | 2.21E+08 | 9.68E-01       | N/A      | 16    | rs7200316  | 5860065  | 5.46E-01            | N/A       | -          | 6.11E-08      | 6.53E-01 | 8.31E-06 | 569     |                                 |
| 1     | rs3766793  | 53363218 | 8.50E-01       | SLC1A7   | 2     | rs243083   | 60427374 | 8.80E-01            | N/A       | -          | 6.12E-08      | 6.84E-01 | 1.45E-04 | 570     |                                 |
| 11    | rs1371351  | 96030639 | 6.33E-01       | N/A      | 11    | rs4258339  | 1.08E+08 | 3.72E-01            | N/A       | -          | 6.13E-08      | N/A      | N/A      | 571     |                                 |
| 2     | rs11888197 | 1.95E+08 | 5.61E-01       | N/A      | 4     | rs9999662  | 7475846  | 4.47E-01            | SORCS2    | -          | 6.14E-08      | 3.07E-01 | 1.58E-04 | 572     |                                 |
| 10    | rs4993019  | 1.33E+08 | 6.54E-01       | N/A      | 15    | rs2288608  | 31821713 | 8.87E-01            | RYR3      | -          | 6.17E-08      | 5.88E-01 | 5.24E-06 | 573     |                                 |
| 7     | rs7788751  | 1.53E+08 | 4.99E-01       | N/A      | 9     | rs10125911 | 1.28E+08 | 9.82E-01            | N/A       | -          | 6.18E-08      | 8.72E-02 | 5.10E-08 | 574     |                                 |
| 3     | rs2276745  | 1.29E+08 | 6.27E-01       | MGLL     | 7     | rs7793131  | 33094064 | 9.86E-01            | RP9       | -          | 6.18E-08      | 6.31E-01 | 3.21E-06 | 575     |                                 |
| 8     | rs1685101  | 32317455 | 6.83E-01       | NRG1     | 11    | rs11232924 | 81304990 | 9.08E-01            | N/A       | -          | 6.19E-08      | 8.80E-01 | 2.93E-05 | 576     |                                 |
| 6     | rs12528284 | 1.67E+08 | 6.57E-01       | RPS6KA2  | 12    | rs12580153 | 91342613 | 1.82E-01            | CLLU1     | -          | 6.26E-08      | 1.90E-01 | 3.91E-04 | 577     |                                 |
| 3     | rs1356792  | 20353157 | 1.25E-01       | N/A      | 14    | rs1152490  | 55865987 | 1.95E-01            | N/A       | -          | 6.26E-08      | 5.30E-01 | 2.11E-05 | 578     |                                 |
| 9     | rs920901   | 74419068 | 7.34E-02       | TMC1     | 17    | rs2323661  | 15241034 | 1.56E-01            | N/A       | -          | 6.31E-08      | 4.05E-01 | 7.32E-04 | 579     |                                 |
| 1     | rs11804163 | 36757321 | 2.49E-01       | N/A      | 3     | rs1868504  | 54397089 | 9.19E-01            | CACNA2D3  | -          | 6.32E-08      | 6.98E-01 | 1.22E-05 | 580     |                                 |
| 1     | rs4660176  | 41066236 | 3.08E-01       | KCNQ4    | 7     | rs740576   | 1.53E+08 | 8.98E-01            | DPP6      | -          | 6.33E-08      | 2.97E-03 | 2.11E-09 | 581     |                                 |
| 11    | rs549289   | 1.17E+08 | 8.02E-01       | DSCAML1  | 15    | rs3145     | 56999403 | 1.93E-01            | SLTM      | -          | 6.34E-08      | 1.54E-01 | 7.15E-04 | 582     |                                 |
| 3     | rs475050   | 22998578 | 6.54E-01       | N/A      | 13    | rs9567867  | 46931402 | 2.50E-01            | N/A       | -          | 6.35E-08      | 4.28E-01 | 4.89E-07 | 583     |                                 |
| 6     | rs9384817  | 1.12E+08 | 4.04E-01       | WSP3     | 3     | rs9820339  | 1.51E+08 | 7.77E-01            | VWTR1     | -          | 6.35E-08      | 3.80E-01 | 8.65E-04 | 584     |                                 |
| 2     | rs1419950  | 2.3E+08  | 3.09E-01       | PID1     | 18    | rs2541874  | 61792527 | 4.60E-01            | N/A       | -          | 6.36E-08      | 2.85E-01 | 1.96E-06 | 585     |                                 |
| 5     | rs4704506  | 77690583 | 5.04E-01       | SCAMP1   | 11    | rs7110734  | 73530035 | 3.56E-01            | C2CD3     | -          | 6.37E-08      | 7.49E-01 | 8.84E-06 | 586     |                                 |
| 5     | rs4704506  | 77690583 | 5.04E-01       | SCAMP1   | 11    | rs11235993 | 73484091 | 3.56E-01            | C2CD3     | -          | 6.37E-08      | 8.03E-01 | 1.09E-05 | 587     |                                 |
| 5     | rs4704506  | 77690583 | 5.04E-01       | SCAMP1   | 11    | rs7125032  | 73484690 | 3.56E-01            | C2CD3     | -          | 6.37E-08      | 8.03E-01 | 1.09E-05 | 588     |                                 |
| 5     | rs2089192  | 1.7E+08  | 5.56E-01       | KCNIP1   | 7     | rs1109552  | 1.28E+08 | 8.96E-01            | FAM71F2   | -          | 6.38E-08      | 3.21E-01 | 2.25E-06 | 589     |                                 |
| 10    | rs2163673  | 90477499 | 7.09E-01       | LIPK     | 21    | rs2837682  | 40826362 | 6.19E-01            | DSCAM     | -          | 6.38E-08      | 8.49E-01 | 2.40E-06 | 590     |                                 |
| 6     | rs17317668 | 25514010 | 7.37E-01       | N/A      | 5     | rs3853114  | 13534754 | 6.45E-01            | N/A       | MHC        | 6.38E-08      | 6.86E-01 | 3.55E-05 | 591     |                                 |
| 7     | rs4472413  | 15380099 | 2.56E-01       | TMEM195  | 10    | rs10762833 | 80441226 | 4.81E-01            | LOC283050 | -          | 6.38E-08      | 9.67E-01 | 2.83E-06 | 592     |                                 |
| 3     | rs7613069  | 10600996 | 5.88E-01       | N/A      | 14    | rs1894371  | 21704535 | 1.04E-01            | N/A       | -          | 6.39E-08      | 7.63E-01 | 2.49E-04 | 593     |                                 |
| 16    | rs12918570 | 56825937 | 7.58E-01       | CCDC113  | 19    | rs2108622  | 15851431 | 2.19E-01            | CYP4F2    | -          | 6.39E-08      | 7.86E-01 | 2.29E-05 | 594     |                                 |
| 2     | rs978673   | 1.61E+08 | 8.99E-01       | N/A      | 11    | rs6592878  | 79405363 | 6.40E-01            | N/A       | -          | 6.42E-08      | 6.17E-01 | 7.35E-05 | 595     |                                 |
| 7     | rs1548210  | 3493211  | 3.57E-01       | SDK1     | 12    | rs10773263 | 1.25E+08 | 8.37E-01            | N/A       | -          | 6.42E-08      | 1.75E-01 | 1.95E-03 | 596     |                                 |
| 7     | rs1548210  | 3493211  | 3.57E-01       | SDK1     | 12    | rs7958738  | 1.25E+08 | 8.37E-01            | N/A       | -          | 6.42E-08      | 1.75E-01 | 1.95E-03 | 597     |                                 |
| 20    | rs6140971  | 9515361  | 1.23E-01       | PAK7     | 20    | rs1015581  | 14467512 | 4.24E-01            | MACROD2   | -          | 6.42E-08      | 2.24E-01 | 5.09E-04 | 598     |                                 |
| 2     | rs2115366  | 8381482  | 9.89E-01       | N/A      | 17    | rs1328120  | 47802041 | 2.49E-01            | N/A       | -          | 6.44E-08      | 8.48E-01 | 7.20E-06 | 599     |                                 |
| 4     | rs7686686  | 1.11E+08 | 3.40E-01       | N/A      | 5     | rs13160791 | 1.62E+08 | 3.80E-01            | N/A       | -          | 6.45E-08      | 1.43E-01 | 3.15E-07 | 600     |                                 |
| 18    | rs593234   | 27933920 | 3.68E-01       | N/A      | 18    | rs7232315  | 53717230 | 6.60E-01            | N/A       | -          | 6.45E-08      | 6.15E-01 | 2.77E-06 | 601     |                                 |
| 13    | rs9511484  | 24339945 | 5.54E-01       | N/A      | 14    | rs11847318 | 30287393 | 7.26E-01            | SCFD1     | -          | 6.47E-08      | 4.04E-01 | 3.09E-05 | 602     |                                 |
| 5     | rs2289285  | 1.49E+08 | 3.32E-01       | ABLIM3   | 19    | rs654765   | 59282648 | 1.52E-01            | NDUFA3    | -          | 6.47E-08      | 9.14E-01 | 2.30E-04 | 603     |                                 |
| 3     | rs12152230 | 35728583 | 4.12E-01       | ARPP-21  | 9     | rs7853654  | 1.33E+08 | 5.42E-01            | ABL1      | -          | 6.48E-08      | 7.04E-01 | 2.48E-05 | 604     |                                 |
| 1     | rs12140479 | 70595826 | 2.66E-01       | ANKRD13C | 8     | rs4737915  | 69810468 | 3.77E-01            | C8orf34   | -          | 6.48E-08      | 2.70E-01 | 3.25E-04 | 605     |                                 |
| 6     | rs658376   | 1.38E+08 | 6.00E-01       | N/A      | 10    | rs10881886 | 92870563 | 4.99E-01            | N/A       | -          | 6.50E-08      | 2.72E-01 | 4.44E-07 | 606     |                                 |
| 7     | rs11983822 | 13067583 | 7.10E-02       | N/A      | 19    | rs1859955  | 62514181 | 6.47E-01            | ZNF460    | -          | 6.50E-08      | 5.85E-01 | 1.85E-06 | 607     |                                 |
| 4     | rs10020207 | 58401219 | 1.97E-01       | N/A      | 16    | rs2938723  | 61142271 | 8.85E-01            | N/A       | -          | 6.52E-08      | 3.20E-01 | 3.84E-04 | 608     |                                 |
| 3     | rs6764210  | 36237237 | 3.32E-01       | N/A      | 16    | rs12149452 | 6977388  | 9.69E-01            | A2BP1     | -          | 6.52E-08      | 8.39E-01 | 1.90E-05 | 609     |                                 |
| 1     | rs12726519 | 1.85E+08 | 6.72E-01       | PLA2G4A  | 18    | rs2023096  | 69807945 | 3.84E-01            | N/A       | -          | 6.52E-08      | 6.45E-01 | 3.53E-06 | 610     |                                 |
| 1     | rs489933   | 5848388  | 1.86E-01       | NPH4     | 2     | rs10848943 | 3814283  | 7.50E-01            | PARP11    | -          | 6.52E-08      | 6.42E-01 | 1.76E-05 | 611     |                                 |
| 6     | rs1009014  | 1.58E+08 | 2.41E-01       | SYNJ2    | 12    | rs11685822 | 64502642 | 9.82E-01            | N/A       | -          | 6.53E-08      | 7.38E-01 | 4.27E-05 | 612     |                                 |
| 1     | rs2576262  | 2.15E+08 | 5.36E-01       | ESRRG    | 19    | rs11669215 | 17867995 | 6.04E-01            | SLC5A5    | -          | 6.53E-08      | 1.41E-02 | 4.02E-09 | 613     |                                 |
| 2     | rs2627857  | 66155597 | 9.35E-01       | N/A      | 8     | rs12164192 | 1.05E+08 | 1.69E-01            | N/A       | -          | 6.53E-08      | 3.25E-01 | 2.51E-04 | 614     |                                 |
| 2     | rs1901753  | 11060172 | 5.04E-01       | N/A      | 8     | rs1534863  | 11705562 | 8.14E-01            | FDFT1     | -          | 6.53E-08      | 2.97E-01 | 4.50E-07 | 615     |                                 |
| 4     | rs11099345 | 1.37E+08 | 5.26E-01       | N/A      | 12    | rs3916142  | 1.28E+08 | 3.78E-02            | TMEM132D  | -          | 6.55E-08      | 8.58E-01 | 6.88E-06 | 616     |                                 |
| 1     | rs1393299  | 1.24E+08 | 3.10E-01       | PLD5     | 7     | rs5024722  | 1.42E+08 | 3.67E-01            | LOC93432  | -          | 6.59E-08      | 2.71E-01 | 3.22E-04 | 617     |                                 |
| 7     | rs17164162 | 2266179  | 6.32E-01       | N/A      | 17    | rs1815198  | 52715584 | 4.21E-02            | MSI2      | -          | 6.59E-08      | 9.12E-01 | 1.47E-05 | 618     |                                 |
| 2     | rs13419210 | 22805243 | 1.19E-01       | N/A      | 9     | rs10812695 | 27917133 | 3.78E-01            | N/A       | -          | 6.62E-08      | 7.47E-01 | 7.23E-05 | 619     |                                 |
| 3     | rs285299   | 36242533 | 5.64E-01       | N/A      | 16    | rs6500892  | 6953116  | 9.44E-01            | A2BP1     | -          | 6.63E-08      | 5.79E-01 | 6.91E-06 | 620     |                                 |
| 3     | rs285299   | 36242533 | 5.64E-01       | N/A      | 16    | rs12149452 | 6977388  | 9.69E-01            | A2BP1     | -          | 6.65E-08      | 9.69E-01 | 2.23E-05 | 621     |                                 |
| 5     | rs1347679  | 1.06E+08 | 6.91E-02       | N/A      | 9     | rs10758314 | 35584724 | 1.76E-01            | TESK1     | -          | 6.66E-08      | 5.23E-01 | 4.43E-06 | 622     |                                 |
| 10    | rs12772794 | 20714659 | 4.84E-01       | N/A      | 21    | rs2070413  | 31424285 | 5.67E-01            | TIAM1     | -          | 6.66E-08      | N/A      | N/A      | 623     |                                 |
| 8     | rs1823506  | 1.11E+08 | 9.86E-01       | N/A      | 12    | rs876594   | 3531820  | 6.92E-01            | PRMT8     | -          | 6.71E-08      | 6.20E-01 | 2.07E-06 | 624     |                                 |
| 2     | rs11898850 | 73033127 | 9.44E-01       | SFXN5    | 11    | rs1083376  | 22472317 | 8.82E-01            | N/A       | -          | 6.71E-08      | 8.10E-01 | 3.16E-05 | 625     |                                 |
| 8     | rs4735729  | 77471658 | 3.79E-01       | N/A      | 17    | rs11871745 | 14593162 | 8.66E-01            | N/A       | -          | 6.72E-08      | 1.58E-01 | 1.96E-06 | 626     |                                 |
| 4     | rs1105889  | 1.54E+08 | 5.31E-01       | FHDC1    | 14    | rs4983413  | 1.05E+08 | 3.35E-01            | MTA1      | -          | 6.74E-08      | 1.61E-01 | 1.83E-08 | 627     |                                 |
| 6     | rs2252551  | 34730654 | 3.57E-01       | C6orf106 | 11    | rs12420855 | 44681103 | 6.76E-01            | N/A       | MHC        | 6.74E-08      | 1.61E-01 | 1.83E-08 | 628     |                                 |
| 6     | rs2815003  | 34743787 | 3.57E-01       | C6orf106 | 11    | rs12420855 | 44681103 | 6.76E-01            | N/A       | MHC        | 6.74E-08      | 6.35E-01 | 2.22E-04 | 629     |                                 |
| 6     | rs6570957  | 1.5E+08  | 2.74E-01       | N/A      | 9     | rs1668978  | 25342327 | 1.10E-01            | N/A       | -          | 6.77E-08      | 7.60E-01 | 4.97E-05 | 630     |                                 |
| 3     | rs2724706  | 1.39     |                |          |       |            |          |                     |           |            |               |          |          |         |                                 |

| SNP A |            |          |                 |             | SNP B |            |          |                    |           | MHC region | Interaction P |          |          | Ranking | Cluster in top 100 interactions |
|-------|------------|----------|-----------------|-------------|-------|------------|----------|--------------------|-----------|------------|---------------|----------|----------|---------|---------------------------------|
| CHR   | SNP        | Location | gle locus P val | Gene        | CHR   | SNP        | Location | single locus P val | Gene      |            | Stage 1       | Stage 2  | Combined |         |                                 |
| 1     | rs3827730  | 50710436 | 1.77E-01        | FAF1        | 13    | rs2324606  | 39882601 | 9.48E-01           | LOC646982 | -          | 7.15E-08      | 1.45E-01 | 2.75E-07 | 671     |                                 |
| 7     | rs17144110 | 21246477 | 4.04E-01        | N/A         | 8     | rs13250344 | 18617744 | 9.93E-01           | PSD3      | -          | 7.16E-08      | 5.51E-01 | 3.90E-04 | 672     |                                 |
| 5     | rs10037741 | 1.06E+08 | 9.07E-02        | N/A         | 12    | rs4763075  | 61962124 | 4.02E-01           | N/A       | -          | 7.16E-08      | N/A      | N/A      | 673     |                                 |
| 3     | rs4684717  | 10598391 | 7.53E-01        | N/A         | 14    | rs12434301 | 21771960 | 9.12E-02           | N/A       | -          | 7.17E-08      | 7.60E-01 | 5.83E-05 | 674     |                                 |
| 6     | rs11753072 | 811963   | 7.32E-01        | N/A         | 1     | rs331635   | 59438130 | 5.19E-01           | N/A       | -          | 7.17E-08      | 9.64E-01 | 1.78E-05 | 675     |                                 |
| 2     | rs1000582  | 1.69E+08 | 6.52E-01        | N/A         | 5     | rs188693   | 42975987 | 7.34E-02           | N/A       | -          | 7.18E-08      | 1.55E-01 | 9.46E-04 | 676     |                                 |
| 1     | rs2148682  | 65642077 | 2.92E-01        | LEPR        | 12    | rs2286007  | 841552   | 6.78E-01           | N/A       | -          | 7.18E-08      | 4.63E-01 | 3.61E-06 | 677     |                                 |
| 7     | rs6460519  | 68551289 | 6.83E-01        | N/A         | 13    | rs2226042  | 59188076 | 8.65E-01           | DIAPH3    | -          | 7.20E-08      | 4.37E-01 | 5.28E-06 | 678     |                                 |
| 9     | rs10820080 | 1.04E+08 | 8.07E-01        | N/A         | 13    | rs9543928  | 74916808 | 3.12E-01           | TBC1D4    | -          | 7.20E-08      | 6.77E-01 | 1.91E-05 | 679     |                                 |
| 1     | rs1008455  | 47446389 | 9.44E-01        | PDZK1IP1    | 15    | rs1579821  | 20501269 | 8.54E-01           | CYFIP1    | -          | 7.20E-08      | 3.51E-01 | 7.78E-05 | 680     |                                 |
| 1     | rs11260963 | 18436036 | 8.74E-01        | IGSF21      | 2     | rs7562418  | 7260610  | 8.88E-01           | N/A       | -          | 7.21E-08      | 7.24E-01 | 5.01E-05 | 681     |                                 |
| 6     | rs6900659  | 1.06E+08 | 8.04E-01        | N/A         | 2     | rs1435009  | 1.63E+08 | 9.35E-03           | KCNH7     | -          | 7.22E-08      | 3.59E-01 | 7.78E-06 | 682     |                                 |
| 5     | rs1001869  | 1.69E+08 | 8.32E-01        | N/A         | 9     | rs817829   | 1.09E+08 | 4.38E-02           | N/A       | -          | 7.23E-08      | 8.42E-01 | 6.24E-06 | 683     |                                 |
| 1     | rs3908575  | 98636348 | 6.82E-01        | N/A         | 9     | rs1138630  | 82170736 | 1.86E-01           | N/A       | -          | 7.25E-08      | 4.08E-01 | 4.97E-06 | 684     |                                 |
| 9     | rs13297228 | 81788576 | 5.45E-01        | N/A         | 22    | rs2213767  | 25700782 | 6.92E-04           | N/A       | -          | 7.26E-08      | 2.78E-01 | 2.02E-06 | 685     |                                 |
| 11    | rs4980704  | 69501109 | 3.49E-01        | N/A         | 13    | rs9551517  | 28128045 | 1.92E-01           | POMP      | -          | 7.26E-08      | 8.67E-01 | 1.82E-05 | 686     |                                 |
| 1     | rs2276401  | 1.57E+08 | 7.22E-01        | SPTA1       | 21    | rs2833492  | 32052953 | 7.21E-01           | N/A       | -          | 7.27E-08      | 3.96E-01 | 1.74E-06 | 687     |                                 |
| 4     | rs1105912  | 25677116 | 7.90E-01        | N/A         | 9     | rs2398829  | 94961237 | 5.90E-01           | N/A       | -          | 7.29E-08      | 8.61E-01 | 1.63E-05 | 688     |                                 |
| 2     | rs12996793 | 70503279 | 3.44E-01        | N/A         | 12    | rs4077193  | 80002092 | 4.19E-01           | ACSS3     | -          | 7.32E-08      | 1.21E-01 | 7.90E-04 | 689     |                                 |
| 2     | rs4852178  | 70501406 | 3.44E-01        | N/A         | 12    | rs4077193  | 80002092 | 4.19E-01           | ACSS3     | -          | 7.32E-08      | 1.21E-01 | 7.90E-04 | 690     |                                 |
| 7     | rs2280659  | 1.54E+08 | 4.99E-01        | DPP6        | 8     | rs1547559  | 8536538  | 4.10E-01           | N/A       | -          | 7.32E-08      | N/A      | N/A      | 691     |                                 |
| 2     | rs2627857  | 66155597 | 9.35E-01        | N/A         | 8     | rs2028945  | 1.05E+08 | 8.30E-02           | RIMS2     | -          | 7.34E-08      | 3.86E-01 | 2.42E-04 | 692     |                                 |
| 3     | rs9870986  | 1.48E+08 | 5.00E-01        | N/A         | 8     | rs12114032 | 20891612 | 8.29E-01           | N/A       | -          | 7.36E-08      | 6.00E-01 | 1.65E-04 | 693     |                                 |
| 3     | rs2350279  | 1.41E+08 | 3.47E-02        | CLSTN2      | 4     | rs2598306  | 42494347 | 7.18E-01           | N/A       | -          | 7.37E-08      | 4.66E-01 | 2.36E-06 | 694     |                                 |
| 6     | rs10782186 | 1.18E+08 | 2.24E-01        | DCBLD1      | 8     | rs6586746  | 18325984 | 2.70E-01           | N/A       | -          | 7.37E-08      | 4.06E-01 | 2.00E-06 | 695     |                                 |
| 13    | rs1171080  | 35385286 | 5.95E-01        | DCLC1       | 13    | rs2786953  | 1E+08    | 9.26E-01           | N/A       | -          | 7.38E-08      | 2.18E-01 | 1.89E-06 | 696     |                                 |
| 1     | rs994712   | 1.06E+08 | 5.15E-01        | N/A         | 16    | rs2407912  | 60158141 | 2.11E-01           | N/A       | -          | 7.38E-08      | 3.22E-01 | 3.75E-07 | 697     |                                 |
| 12    | rs1872521  | 1.27E+08 | 8.77E-01        | N/A         | 22    | rs713839   | 35063884 | 4.44E-01           | MYH9      | -          | 7.40E-08      | 2.43E-01 | 1.70E-06 | 698     |                                 |
| 12    | rs1872521  | 1.27E+08 | 8.77E-01        | N/A         | 22    | rs2413398  | 35060893 | 4.44E-01           | MYH9      | -          | 7.40E-08      | 2.80E-01 | 2.20E-06 | 699     |                                 |
| 8     | rs2190162  | 5342127  | 1.62E-01        | N/A         | 14    | rs8018930  | 94309119 | 5.71E-01           | GSC       | -          | 7.45E-08      | 4.55E-01 | 2.94E-04 | 700     |                                 |
| 6     | rs12216269 | 1.38E+08 | 9.09E-01        | N/A         | 20    | rs2208973  | 12342990 | 4.41E-01           | N/A       | -          | 7.46E-08      | 5.59E-01 | 1.35E-04 | 701     |                                 |
| 7     | rs795683   | 1.14E+08 | 9.10E-01        | N/A         | 14    | rs1315728  | 67013662 | 9.59E-01           | TMEM229B  | -          | 7.47E-08      | 6.64E-01 | 1.70E-04 | 702     |                                 |
| 3     | rs2581786  | 53101183 | 1.65E-01        | RFT1        | 17    | rs2301775  | 34594761 | 8.82E-01           | CACNB1    | -          | 7.47E-08      | N/A      | N/A      | 703     |                                 |
| 14    | rs1959375  | 44021538 | 2.55E-01        | N/A         | 14    | rs7156399  | 95104682 | 7.38E-01           | N/A       | -          | 7.47E-08      | 2.84E-01 | 1.01E-04 | 704     |                                 |
| 1     | rs2131384  | 1.93E+08 | 3.15E-01        | N/A         | 5     | rs27114    | 14498585 | 4.08E-01           | TRIO      | -          | 7.51E-08      | 9.14E-01 | 2.70E-05 | 705     |                                 |
| 1     | rs1268910  | 2.13E+08 | 3.18E-01        | N/A         | 5     | rs13172112 | 31068066 | 4.99E-05           | N/A       | -          | 7.53E-08      | 4.01E-01 | 9.51E-06 | 706     |                                 |
| 1     | rs1268910  | 2.13E+08 | 3.18E-01        | N/A         | 5     | rs16900572 | 31069693 | 4.99E-05           | N/A       | -          | 7.53E-08      | 4.01E-01 | 9.51E-06 | 707     |                                 |
| 2     | rs9309723  | 1009753  | 3.36E-01        | SNTG2       | 8     | rs2111570  | 1.41E+08 | 5.71E-01           | KCNK9     | -          | 7.53E-08      | 2.88E-01 | 1.83E-06 | 708     |                                 |
| 2     | rs17013592 | 77088275 | 7.17E-01        | LRRTM4      | 5     | rs7726783  | 3187719  | 3.47E-01           | N/A       | -          | 7.54E-08      | 7.69E-01 | 3.07E-05 | 709     |                                 |
| 2     | rs1470504  | 77076318 | 7.97E-01        | LRRTM4      | 5     | rs597099   | 3192158  | 7.14E-01           | N/A       | -          | 7.55E-08      | 7.37E-01 | 3.31E-05 | 710     |                                 |
| 6     | rs776600   | 1860827  | 7.88E-01        | GMD5        | 7     | rs337901   | 1.26E+08 | 2.65E-02           | N/A       | -          | 7.56E-08      | 2.95E-01 | 1.70E-04 | 711     |                                 |
| 3     | rs6791296  | 62406455 | 7.93E-01        | CADPS       | 20    | rs1205693  | 49750938 | 1.27E-01           | ATP9A     | -          | 7.58E-08      | 2.58E-01 | 9.43E-05 | 712     |                                 |
| 1     | rs1125953  | 1.96E+08 | 9.32E-01        | N/A         | 7     | rs1035169  | 1.04E+08 | 7.40E-01           | ORC5L     | -          | 7.62E-08      | 7.39E-01 | 1.14E-05 | 713     |                                 |
| 7     | rs893785   | 12471898 | 1.57E-02        | N/A         | 7     | rs5004318  | 47765998 | 9.25E-01           | PKD1L1    | -          | 7.62E-08      | 9.56E-01 | 7.72E-05 | 714     |                                 |
| 7     | rs893785   | 12471898 | 1.57E-02        | N/A         | 7     | rs6953403  | 47768997 | 9.25E-01           | PKD1L1    | -          | 7.62E-08      | 9.56E-01 | 7.72E-05 | 715     |                                 |
| 6     | rs4714674  | 43352692 | 6.53E-03        | TTBK1       | 17    | rs9895907  | 5521311  | 2.74E-01           | N/A       | -          | 7.63E-08      | 9.54E-01 | 2.23E-05 | 716     |                                 |
| 6     | rs4714674  | 43352692 | 6.53E-03        | TTBK1       | 17    | rs9915238  | 5520461  | 3.13E-01           | N/A       | -          | 7.63E-08      | 9.54E-01 | 2.23E-05 | 717     |                                 |
| 6     | rs2744974  | 34687409 | 3.36E-01        | C6orf106    | 11    | rs12420854 | 44681103 | 6.76E-01           | N/A       | MHC        | 7.65E-08      | 4.65E-01 | 1.30E-06 | 718     |                                 |
| 7     | rs2188513  | 92382009 | 5.14E-01        | N/A         | 8     | rs10104993 | 69509383 | 1.91E-01           | N/A       | -          | 7.68E-08      | N/A      | N/A      | 719     |                                 |
| 3     | rs6779886  | 1.17E+08 | 3.97E-01        | LSAMP       | 7     | rs219822   | 98427987 | 1.21E-01           | TRRAP     | -          | 7.72E-08      | 1.64E-01 | 1.17E-06 | 720     |                                 |
| 10    | rs7446372  | 77608248 | 4.90E-01        | C10orf11    | 20    | rs1470351  | 5097713  | 6.38E-02           | CDS2      | -          | 7.73E-08      | 6.65E-01 | 1.19E-05 | 721     |                                 |
| 5     | rs7718088  | 1.8E+08  | 3.52E-01        | RASGEF1C    | 8     | rs13267425 | 1.02E+08 | 2.72E-02           | N/A       | -          | 7.73E-08      | 7.76E-01 | 3.20E-05 | 722     |                                 |
| 3     | rs10514694 | 36283073 | 2.94E-01        | N/A         | 16    | rs12923615 | 6951319  | 7.89E-01           | A2BP1     | -          | 7.74E-08      | 3.00E-01 | 3.73E-06 | 723     |                                 |
| 2     | rs797703   | 47801295 | 8.31E-01        | N/A         | 3     | rs6438537  | 1.21E+08 | 4.07E-01           | CD80      | -          | 7.74E-08      | 7.88E-01 | 1.03E-05 | 724     |                                 |
| 3     | rs13094598 | 35709235 | 3.90E-01        | ARPP-21     | 9     | rs7853654  | 1.33E+08 | 5.42E-01           | ABL1      | -          | 7.75E-08      | 6.98E-01 | 5.43E-05 | 725     |                                 |
| 2     | rs1918876  | 1.45E+08 | 8.78E-01        | N/A         | 13    | rs8181851  | 58498359 | 3.14E-01           | N/A       | -          | 7.76E-08      | 6.69E-01 | 6.58E-05 | 726     |                                 |
| 2     | rs904162   | 47363828 | 4.44E-01        | N/A         | 7     | rs1859032  | 1.17E+08 | 2.28E-01           | N/A       | -          | 7.76E-08      | 3.19E-01 | 6.47E-07 | 727     |                                 |
| 8     | rs4384011  | 1.2E+08  | 2.67E-01        | N/A         | 13    | rs2985947  | 45056322 | 2.08E-02           | FAM194B   | -          | 7.77E-08      | 5.00E-02 | 2.69E-03 | 728     |                                 |
| 3     | rs12233598 | 1.51E+08 | 2.23E-01        | N/A         | 8     | rs4504596  | 11149302 | 6.37E-01           | N/A       | -          | 7.77E-08      | 7.68E-01 | 1.22E-04 | 729     |                                 |
| 10    | rs2766070  | 1.29E+08 | 5.64E-01        | DOCK1       | 13    | rs400532   | 1.1E+08  | 1.75E-01           | COL4A2    | -          | 7.79E-08      | 2.32E-01 | 8.54E-07 | 730     |                                 |
| 6     | rs1006012  | 53966408 | 8.93E-01        | N/A         | 1     | rs1188473  | 2.27E+08 | 2.53E-01           | TRIM11    | -          | 7.80E-08      | 8.70E-01 | 1.12E-04 | 731     |                                 |
| 5     | rs1865508  | 1.05E+08 | 1.73E-01        | N/A         | 12    | rs12824011 | 61935103 | 2.85E-01           | N/A       | -          | 7.80E-08      | 6.51E-01 | 9.66E-06 | 732     |                                 |
| 3     | rs6764210  | 36237237 | 5.32E-01        | N/A         | 16    | rs12923615 | 6951319  | 7.89E-01           | A2BP1     | -          | 7.84E-08      | 4.72E-01 | 1.14E-05 | 733     |                                 |
| 1     | rs16858460 | 1.65E+08 | 8.22E-01        | DUSP27      | 12    | rs2632226  | 7553673  | 3.99E-01           | N/A       | -          | 7.86E-08      | 5.66E-01 | 2.21E-05 | 734     |                                 |
| 9     | rs10759387 | 1.12E+08 | 5.73E-01        | PALM2-AKAP2 | 22    | rs4823336  | 43304667 | 1.50E-01           | N/A       | -          | 7.86E-08      | 8.37E-02 | 2.38E-03 | 735     |                                 |
| 3     | rs4377455  | 29403191 | 6.47E-01        | N/A         | 15    | rs11634230 | 91503829 | 2.60E-02           | N/A       | -          | 7.87E-08      | 5.85E-01 | 1.48E-06 | 736     |                                 |
| 2     | rs6543606  | 31208012 | 2.20E-01        | GALNT14     | 7     | rs13228933 | 53674043 | 6.93E-01           | N/A       | -          | 7.87E-08      | 9.45E-01 | 2.16E-05 | 737     |                                 |
| 1     | rs11806304 | 1.85E+08 | 3.57E-01        | C1orf27     | 5     | rs7715102  | 2427305  | 5.42E-01           | N/A       | -          | 7.88E-08      | 5.24E-01 | 5.00E-06 | 738     |                                 |
| 1     | rs559798   | 2.43E+08 | 9.42E-01        | C1orf100    | 11    | rs2004933  | 43432394 | 6.42E-01           | TTC17     | -          | 7.89E-08      | 6.94E-01 | 1.09E-04 | 739     |                                 |
| 1     | rs559798   | 2.43E+08 | 9.42E-01        | C1orf100    | 11    | rs4354680  | 43345907 | 6.42E-01           | TTC17     | -          | 7.89E-08      | 7.92E-01 | 7.18E-05 | 740     |                                 |
| 2     | rs4675124  | 2.28E+08 | 5.93E-01        | RHBDD1      | 17    | rs4239112  | 10096227 | 3.32E-01           | N/A       | -          | 7.90E-08      | 2.77E-01 | 2.50E-07 | 741     |                                 |
| 2     | rs1527418  | 1.19E+08 | 1.90E-01        | N/A         | 9     | rs4842173  | 1.37E+08 | 9.22E-01           | COL5A1    | -          | 7.91E-08      | 2.68E-01 | 5.85E-06 | 742     |                                 |
| 1     | rs680925   | 66355709 | 3.11E-01        | PDE4B       | 1     | rs9943293  | 1.7E+08  | 3.                 |           |            |               |          |          |         |                                 |





| SNP A |            |          |                |              | SNP B |            |          |                     |           | Interaction P |          |          | Ranking  | Cluster in top 100 interactions |  |
|-------|------------|----------|----------------|--------------|-------|------------|----------|---------------------|-----------|---------------|----------|----------|----------|---------------------------------|--|
| CHR   | SNP        | Location | gle locus P va | Gene         | CHR   | SNP        | Location | single locus P valu | Gene      | MHC region    | Stage 1  | Stage 2  | Combined |                                 |  |
| 7     | rs2888889  | 92376825 | 4.75E-01       | N/A          | 8     | rs2249536  | 69486976 | 2.13E-01            | N/A       | -             | 1.02E-07 | 6.39E-01 | 2.30E-06 | 1007                            |  |
| 4     | rs1993616  | 1.74E+08 | 5.91E-01       | GALNTL6      | 22    | rs7293017  | 18113811 | 5.60E-02            | TBX1      | -             | 1.02E-07 | 6.60E-02 | 4.00E-07 | 1008                            |  |
| 6     | rs4947296  | 31166157 | 4.31E-02       | N/A          | 6     | rs3868542  | 31253818 | 5.85E-02            | TCF19     | MHC           | 1.02E-07 | 4.15E-01 | 1.32E-05 | 1009                            |  |
| 9     | rs1231343  | 25732531 | 4.72E-01       | N/A          | 17    | rs9898180  | 48469648 | 8.18E-01            | N/A       | -             | 1.03E-07 | 9.69E-02 | 3.62E-07 | 1010                            |  |
| 2     | rs11695281 | 28540072 | 3.33E-02       | N/A          | 17    | rs17636925 | 14698780 | 4.93E-01            | N/A       | -             | 1.03E-07 | 4.19E-01 | 5.69E-04 | 1011                            |  |
| 7     | rs10951658 | 41755259 | 4.59E-01       | LOC285954    | 17    | rs895690   | 70296244 | 2.37E-01            | SLC9A3R1  | -             | 1.03E-07 | 5.00E-01 | 2.11E-04 | 1012                            |  |
| 5     | rs252155   | 1.5E+08  | 6.37E-01       | RCBM22       | 8     | rs11787085 | 62783393 | 3.57E-01            | ASPH      | -             | 1.03E-07 | 5.61E-01 | 1.61E-05 | 1013                            |  |
| 2     | rs4611674  | 638899   | 2.98E-03       | TMEM18       | 9     | rs3812541  | 1.4E+08  | 3.64E-01            | CACNA1B   | -             | 1.03E-07 | 3.45E-01 | 2.28E-06 | 1014                            |  |
| 3     | rs1628472  | 1.18E+08 | 8.75E-01       | N/A          | 8     | rs3802232  | 1.44E+08 | 2.77E-01            | JRK       | -             | 1.03E-07 | 3.46E-02 | 1.10E-03 | 1015                            |  |
| 11    | rs952131   | 1.29E+08 | 6.41E-01       | N/A          | 19    | rs2255598  | 24248960 | 9.93E-01            | N/A       | -             | 1.03E-07 | 9.06E-01 | 1.39E-04 | 1016                            |  |
| 2     | rs4281898  | 2.28E+08 | 5.50E-01       | RHBDD1       | 17    | rs4239112  | 10096227 | 3.32E-01            | N/A       | -             | 1.03E-07 | 4.05E-01 | 5.73E-07 | 1017                            |  |
| 10    | rs7074840  | 1.28E+08 | 1.63E-01       | N/A          | 12    | rs1566575  | 41963432 | 3.88E-01            | N/A       | -             | 1.03E-07 | 2.24E-01 | 8.12E-04 | 1018                            |  |
| 10    | rs4746372  | 77608248 | 4.90E-01       | C10orf11     | 20    | rs6107589  | 5098051  | 5.46E-02            | CDS2      | -             | 1.03E-07 | 6.65E-01 | 1.44E-05 | 1019                            |  |
| 10    | rs12243844 | 55532600 | 6.59E-01       | PCDH15       | 11    | rs657339   | 73886240 | 6.83E-02            | LIPT2     | -             | 1.04E-07 | 5.96E-02 | 2.09E-03 | 1020                            |  |
| 3     | rs9811344  | 1.14E+08 | 9.41E-01       | N/A          | 5     | rs10479044 | 1.33E+08 | 2.60E-01            | FSTL4     | -             | 1.04E-07 | 6.52E-02 | 2.66E-07 | 1021                            |  |
| 1     | rs1808806  | 1.18E+08 | 8.04E-01       | FAM46C       | 2     | rs2695616  | 57761698 | 3.10E-01            | N/A       | -             | 1.04E-07 | 7.76E-01 | 3.66E-05 | 1022                            |  |
| 6     | rs9480096  | 1.51E+08 | 4.85E-01       | PPP1R14C     | 5     | rs12520518 | 53820991 | 1.16E-01            | N/A       | -             | 1.04E-07 | 5.09E-01 | 8.12E-07 | 1023                            |  |
| 18    | rs767887   | 3643422  | 4.12E-01       | DLGAP1       | 20    | rs6080604  | 17136874 | 7.42E-01            | PCSK2     | -             | 1.04E-07 | 4.67E-01 | 4.83E-06 | 1024                            |  |
| 4     | rs7690190  | 16128817 | 8.77E-01       | LDB2         | 8     | rs11136715 | 4118520  | 9.92E-01            | CSMD1     | -             | 1.04E-07 | 6.05E-01 | 5.98E-06 | 1025                            |  |
| 2     | rs10207182 | 2.14E+08 | 4.13E-01       | SPAG16       | 14    | rs1885147  | 28063661 | 9.81E-01            | N/A       | -             | 1.04E-07 | 1.43E-01 | 5.92E-07 | 1026                            |  |
| 3     | rs2724693  | 1.39E+08 | 3.64E-01       | N/A          | 8     | rs1500906  | 96601801 | 1.79E-01            | N/A       | -             | 1.04E-07 | 1.51E-01 | 2.07E-03 | 1027                            |  |
| 3     | rs2724693  | 1.39E+08 | 3.64E-01       | N/A          | 8     | rs1500909  | 96602267 | 1.79E-01            | N/A       | -             | 1.04E-07 | 1.51E-01 | 2.07E-03 | 1028                            |  |
| 8     | rs4875428  | 4841962  | 7.27E-01       | CSMD1        | 8     | rs4581170  | 1.43E+08 | 8.94E-01            | TSN/ARE1  | -             | 1.04E-07 | 3.92E-02 | 4.23E-08 | 1029                            |  |
| 8     | rs7833343  | 58513774 | 8.93E-01       | N/A          | 18    | rs1421265  | 52617413 | 6.52E-01            | WDR7      | -             | 1.04E-07 | 1.88E-01 | 8.72E-04 | 1030                            |  |
| 2     | rs2253680  | 1.7E+08  | 8.71E-02       | FASTKD1      | 11    | rs4757326  | 15444590 | 6.88E-01            | N/A       | -             | 1.04E-07 | 4.50E-01 | 3.77E-04 | 1031                            |  |
| 6     | rs3131003  | 31201461 | 6.51E-01       | C6orf15      | 6     | rs3130467  | 31295054 | 5.92E-02            | HCG27     | MHC           | 1.04E-07 | 5.06E-01 | 3.95E-05 | 1032                            |  |
| 2     | rs2253680  | 1.7E+08  | 8.71E-02       | FASTKD1      | 11    | rs7479920  | 15430164 | 6.88E-01            | N/A       | -             | 1.04E-07 | 8.14E-01 | 3.46E-05 | 1033                            |  |
| 3     | rs9852746  | 55778372 | 2.40E-01       | ERC2         | 19    | rs1860565  | 62026834 | 7.53E-01            | PEG3      | -             | 1.04E-07 | 8.65E-01 | 4.17E-05 | 1034                            |  |
| 9     | rs10117492 | 11924556 | 8.13E-01       | N/A          | 22    | rs5992838  | 16644831 | 1.46E-01            | BID       | -             | 1.05E-07 | 7.36E-02 | 1.72E-07 | 1035                            |  |
| 3     | rs1871493  | 1.42E+08 | 8.68E-01       | CLSTN2       | 5     | rs17769571 | 1.29E+08 | 8.95E-01            | CHSY3     | -             | 1.05E-07 | 8.64E-01 | 3.25E-05 | 1036                            |  |
| 7     | rs11764649 | 12537614 | 3.90E-01       | N/A          | 19    | rs2074879  | 13235899 | 5.33E-01            | CACNA1A   | -             | 1.05E-07 | 3.35E-01 | 2.71E-04 | 1037                            |  |
| 1     | rs10864702 | 2.3E+08  | 4.93E-01       | TSN/AX-DISC1 | 2     | rs1019731  | 2.04E+08 | 7.93E-01            | N/A       | -             | 1.05E-07 | 4.75E-01 | 3.54E-05 | 1038                            |  |
| 1     | rs10864702 | 2.3E+08  | 4.93E-01       | TSN/AX-DISC1 | 2     | rs12616245 | 2.04E+08 | 7.93E-01            | N/A       | -             | 1.05E-07 | 4.75E-01 | 3.54E-05 | 1039                            |  |
| 11    | rs952131   | 1.29E+08 | 6.41E-01       | N/A          | 19    | rs10405242 | 24166259 | 8.92E-01            | N/A       | -             | 1.05E-07 | 9.68E-01 | 7.46E-05 | 1040                            |  |
| 6     | rs12528284 | 1.67E+08 | 6.57E-01       | RPS6KA2      | 12    | rs406117   | 91323127 | 2.14E-01            | CLLU1     | -             | 1.05E-07 | 2.15E-01 | 4.39E-04 | 1041                            |  |
| 11    | rs3901366  | 1.2E+08  | 7.75E-01       | N/A          | 16    | rs11640875 | 81278925 | 3.67E-02            | CDH13     | -             | 1.05E-07 | 6.10E-01 | 1.31E-05 | 1042                            |  |
| 7     | rs4543487  | 82641622 | 3.47E-01       | PCLO         | 12    | rs1495778  | 40272610 | 1.98E-01            | PDZRN4    | -             | 1.05E-07 | 2.28E-01 | 9.17E-06 | 1043                            |  |
| 5     | rs17745927 | 1.7E+08  | 9.72E-01       | KCNIP1       | 7     | rs6958788  | 1.28E+08 | 8.77E-01            | FAM71F2   | -             | 1.05E-07 | 2.71E-01 | 2.17E-06 | 1044                            |  |
| 5     | rs4615276  | 1.06E+08 | 1.15E-01       | N/A          | 12    | rs4763075  | 61962124 | 4.02E-01            | N/A       | -             | 1.05E-07 | 7.97E-01 | 6.08E-05 | 1045                            |  |
| 17    | rs17810148 | 9658805  | 1.38E-01       | GLP2R        | 22    | rs2318406  | 47713629 | 2.45E-01            | N/A       | -             | 1.05E-07 | 6.00E-01 | 1.95E-04 | 1046                            |  |
| 9     | rs4877228  | 83790792 | 6.16E-02       | FLJ46321     | 21    | rs6517385  | 37156142 | 7.73E-01            | HLCS      | -             | 1.05E-07 | 6.05E-01 | 3.31E-06 | 1047                            |  |
| 5     | rs4348193  | 77671476 | 5.91E-01       | N/A          | 11    | rs3741135  | 73391608 | 7.68E-01            | UCP3      | -             | 1.05E-07 | 7.61E-01 | 4.35E-05 | 1048                            |  |
| 19    | rs12971499 | 7165282  | 4.79E-01       | INSR         | 19    | rs2071572  | 60378042 | 1.78E-01            | PTPRH     | -             | 1.06E-07 | 8.64E-01 | 1.48E-04 | 1049                            |  |
| 6     | rs2025866  | 85453231 | 9.61E-01       | N/A          | 1     | rs6656361  | 1.45E+08 | 7.69E-01            | LOC728989 | -             | 1.06E-07 | N/A      | N/A      | 1050                            |  |
| 6     | rs4407684  | 85500368 | 9.61E-01       | TBX18        | 1     | rs6656361  | 1.45E+08 | 7.69E-01            | LOC728989 | -             | 1.06E-07 | N/A      | N/A      | 1051                            |  |
| 1     | rs3002297  | 2.13E+08 | 7.72E-01       | PTPN14       | 13    | rs10492664 | 1.08E+08 | 6.04E-02            | N/A       | -             | 1.06E-07 | 6.64E-01 | 9.62E-05 | 1052                            |  |
| 5     | rs11949188 | 1.68E+08 | 3.45E-01       | WWC1         | 8     | rs2670027  | 57586721 | 2.94E-01            | N/A       | -             | 1.06E-07 | 5.37E-01 | 3.87E-06 | 1053                            |  |
| 9     | rs2183124  | 33105556 | 6.29E-01       | BAGALT1      | 9     | rs11143087 | 73846129 | 2.00E-01            | C9orf57   | -             | 1.06E-07 | 9.71E-01 | 1.79E-04 | 1054                            |  |
| 2     | rs11691849 | 85248122 | 3.01E-01       | TCF7L1       | 7     | rs10951853 | 5249937  | 9.05E-01            | WIPI2     | -             | 1.06E-07 | 9.78E-01 | 2.38E-05 | 1055                            |  |
| 2     | rs4853333  | 77772523 | 7.72E-01       | N/A          | 7     | rs11543821 | 1.34E+08 | 3.66E-01            | AGBL3     | -             | 1.06E-07 | 5.98E-01 | 2.10E-04 | 1056                            |  |
| 5     | rs1382342  | 1.16E+08 | 8.12E-01       | COMMD10      | 18    | rs7240382  | 72579628 | 1.92E-01            | N/A       | -             | 1.06E-07 | 7.04E-01 | 3.28E-05 | 1057                            |  |
| 4     | rs1824864  | 22241457 | 6.39E-01       | N/A          | 16    | rs4344741  | 49008892 | 1.50E-01            | N/A       | -             | 1.06E-07 | 9.15E-01 | 3.30E-05 | 1058                            |  |
| 6     | rs9358131  | 17661992 | 3.30E-01       | CAP2         | 7     | rs11772815 | 28357572 | 3.06E-01            | CREB5     | -             | 1.06E-07 | 7.70E-01 | 9.60E-05 | 1059                            |  |
| 12    | rs319284   | 11276538 | 2.09E-01       | N/A          | 13    | rs9559465  | 1.08E+08 | 1.14E-01            | MYO16     | -             | 1.06E-07 | 2.55E-01 | 3.76E-06 | 1060                            |  |
| 1     | rs1832899  | 56974459 | 8.89E-01       | C1orf168     | 8     | rs1460399  | 3018385  | 7.11E-01            | CSMD1     | -             | 1.06E-07 | 6.87E-01 | 1.58E-04 | 1061                            |  |
| 5     | rs10515241 | 95988347 | 3.03E-01       | N/A          | 14    | rs1010452  | 94249523 | 6.44E-01            | N/A       | -             | 1.07E-07 | 2.36E-01 | 3.63E-06 | 1062                            |  |
| 17    | rs9909852  | 20231611 | 2.03E-01       | CCDC144C     | 18    | rs11876552 | 29643580 | 4.76E-01            | N/A       | -             | 1.07E-07 | 5.81E-01 | 3.06E-04 | 1063                            |  |
| 6     | rs9368675  | 31380136 | 7.91E-01       | N/A          | 6     | rs2844575  | 31442924 | 5.47E-01            | HLA-B     | MHC           | 1.07E-07 | 9.48E-01 | 9.41E-05 | 1064                            |  |
| 6     | rs4897358  | 1.3E+08  | 1.08E-01       | N/A          | 14    | rs1397163  | 91173949 | 1.20E-01            | CATSPERB  | -             | 1.07E-07 | 9.86E-01 | 3.82E-05 | 1065                            |  |
| 7     | rs4731401  | 1.28E+08 | 3.69E-01       | N/A          | 18    | rs1187247  | 49114530 | 1.56E-01            | DCC       | -             | 1.07E-07 | 5.33E-01 | 5.00E-06 | 1066                            |  |
| 6     | rs9355443  | 1.64E+08 | 5.34E-01       | N/A          | 17    | rs4794031  | 44697152 | 8.27E-01            | N/A       | -             | 1.07E-07 | 3.20E-01 | 1.29E-03 | 1067                            |  |
| 2     | rs976904   | 1.33E+08 | 1.22E-01       | NCKAP5       | 11    | rs10502208 | 1.15E+08 | 5.14E-01            | N/A       | -             | 1.07E-07 | 1.19E-01 | 6.15E-04 | 1068                            |  |
| 3     | rs1350415  | 55888277 | 3.06E-01       | ERC2         | 3     | rs11718095 | 1.87E+08 | 1.60E-01            | N/A       | -             | 1.07E-07 | 9.14E-01 | 7.36E-06 | 1069                            |  |
| 3     | rs6550484  | 37603838 | 4.94E-01       | ITGA9        | 8     | rs7009980  | 4488686  | 4.40E-01            | CSMD1     | -             | 1.07E-07 | 4.13E-01 | 7.83E-06 | 1070                            |  |
| 3     | rs6550483  | 37603715 | 4.94E-01       | ITGA9        | 8     | rs7009980  | 4488686  | 4.40E-01            | CSMD1     | -             | 1.07E-07 | 8.90E-01 | 9.73E-05 | 1071                            |  |
| 5     | rs1432679  | 1.58E+08 | 5.12E-01       | EBF1         | 8     | rs10503585 | 16758568 | 6.56E-01            | N/A       | -             | 1.07E-07 | 8.90E-01 | 9.73E-05 | 1072                            |  |
| 2     | rs1466180  | 1.69E+08 | 7.53E-01       | N/A          | 5     | rs188693   | 42975987 | 7.34E-02            | N/A       | -             | 1.07E-07 | 1.54E-01 | 1.13E-03 | 1073                            |  |
| 9     | rs7039047  | 11936421 | 7.63E-01       | N/A          | 22    | rs5992838  | 16644831 | 1.46E-01            | BID       | -             | 1.08E-07 | 4.53E-02 | 8.70E-08 | 1074                            |  |
| 5     | rs10462803 | 5201635  | 8.83E-01       | ADAMTS16     | 12    | rs862231   | 89243803 | 5.47E-02            | N/A       | -             | 1.08E-07 | N/A      | N/A      | 1075                            |  |
| 3     | rs1628472  | 1.18E+08 | 8.75E-01       | N/A          | 8     | rs4545075  | 1.44E+08 | 1.06E-01            | N/A       | -             | 1.08E-07 | 2.44E-01 | 2.02E-04 | 1076                            |  |
| 5     | rs4457046  | 1.06E+08 | 5.53E-02       | N/A          | 12    | rs12824011 | 61935103 | 2.85E-01            | N/A       | -             | 1.08E-07 | 7.10E-01 | 2.89E-05 | 1077                            |  |
| 2     | rs6742683  | 1.07E+08 | 1.69E-02       | N/A          | 3     | rs566216   | 1.76E+08 | 5.95E-01            | N/A       | -             | 1.08     |          |          |                                 |  |

| SNP A |            |          |                 |          | SNP B |            |          |                    |           | MHC region | Interaction P |          |          | Ranking | Cluster in top 100 interactions |
|-------|------------|----------|-----------------|----------|-------|------------|----------|--------------------|-----------|------------|---------------|----------|----------|---------|---------------------------------|
| CHR   | SNP        | Location | gle locus P val | Gene     | CHR   | SNP        | Location | single locus P val | Gene      |            | Stage 1       | Stage 2  | Combined |         |                                 |
| 3     | rs10804521 | 1.17E+08 | 4.00E-01        | LSAMP    | 7     | rs219822   | 98427987 | 1.21E-01           | TRRAP     | -          | 1.13E-07      | 2.14E-01 | 2.27E-06 | 1119    |                                 |
| 4     | rs10020207 | 58401219 | 1.97E-01        | N/A      | 16    | rs2938721  | 61138773 | 9.26E-01           | N/A       | -          | 1.13E-07      | 3.32E-01 | 5.51E-04 | 1120    |                                 |
| 8     | rs6984354  | 77447663 | 3.95E-01        | N/A      | 17    | rs11871745 | 14593162 | 8.66E-01           | N/A       | -          | 1.13E-07      | 1.71E-01 | 3.14E-06 | 1121    |                                 |
| 2     | rs12328213 | 78409751 | 8.91E-01        | N/A      | 9     | rs871807   | 1.16E+08 | 9.50E-01           | ZNF618    | -          | 1.13E-07      | 4.59E-01 | 1.66E-04 | 1122    |                                 |
| 6     | rs9498131  | 1.49E+08 | 4.50E-01        | N/A      | 9     | rs7023466  | 92045628 | 8.06E-01           | N/A       | -          | 1.13E-07      | 4.84E-01 | 2.47E-05 | 1123    |                                 |
| 2     | rs2264132  | 2.39E+08 | 9.80E-01        | SCLY     | 13    | rs9524661  | 94332852 | 9.91E-01           | N/A       | -          | 1.13E-07      | 6.60E-01 | 3.86E-06 | 1124    |                                 |
| 1     | rs10889976 | 41634712 | 1.59E-01        | N/A      | 12    | rs4019549  | 93503803 | 9.98E-01           | TMCC3     | -          | 1.13E-07      | 8.49E-01 | 1.12E-04 | 1125    |                                 |
| 2     | rs601400   | 1.66E+08 | 5.54E-01        | N/A      | 12    | rs2359895  | 5369951  | 9.03E-02           | N/A       | -          | 1.13E-07      | 6.57E-02 | 2.94E-03 | 1126    |                                 |
| 8     | rs11167147 | 1.44E+08 | 3.22E-01        | BAI1     | 9     | rs4740990  | 9795134  | 7.52E-01           | PTPRD     | -          | 1.13E-07      | 7.96E-01 | 2.89E-05 | 1127    |                                 |
| 3     | rs6772642  | 1.38E+08 | 9.15E-01        | N/A      | 7     | rs1496770  | 78096946 | 2.41E-01           | MAGI2     | -          | 1.13E-07      | 9.36E-01 | 1.69E-04 | 1128    |                                 |
| 1     | rs9287077  | 1.65E+08 | 8.02E-01        | GPA33    | 12    | rs2669013  | 75547079 | 6.30E-01           | N/A       | -          | 1.13E-07      | N/A      | N/A      | 1129    |                                 |
| 7     | rs219822   | 98427987 | 1.21E-01        | TRRAP    | 12    | rs10843756 | 30507005 | 6.47E-01           | N/A       | -          | 1.13E-07      | 3.14E-01 | 4.32E-07 | 1130    |                                 |
| 3     | rs285299   | 36242533 | 5.64E-01        | N/A      | 16    | rs12923615 | 6951319  | 7.89E-01           | A2BP1     | -          | 1.13E-07      | 5.18E-01 | 1.28E-05 | 1131    |                                 |
| 12    | rs759391   | 94984098 | 5.37E-01        | N/A      | 21    | rs2837914  | 41348235 | 7.00E-02           | N/A       | -          | 1.13E-07      | 9.15E-01 | 5.06E-05 | 1132    |                                 |
| 8     | rs12546391 | 22351173 | 8.12E-01        | SLC39A14 | 12    | rs11059561 | 1.27E+08 | 6.30E-01           | N/A       | -          | 1.13E-07      | 1.03E-01 | 2.52E-03 | 1133    |                                 |
| 4     | rs1379977  | 84769783 | 7.71E-01        | N/A      | 11    | rs2047443  | 80303491 | 5.66E-01           | N/A       | -          | 1.13E-07      | 8.22E-01 | 4.70E-06 | 1134    |                                 |
| 1     | rs2168924  | 2.15E+08 | 8.89E-01        | USH2A    | 17    | rs9905659  | 68208939 | 3.75E-01           | SLC39A11  | -          | 1.13E-07      | 9.65E-01 | 7.82E-05 | 1135    |                                 |
| 6     | rs7763910  | 26580634 | 9.24E-01        | TBN3A3   | 15    | rs813299   | 29225595 | 8.06E-01           | N/A       | MHC        | 1.13E-07      | 1.31E-01 | 1.79E-03 | 1136    |                                 |
| 8     | rs1049874  | 17971607 | 2.79E-01        | ASAH1    | 8     | rs1473482  | 18641042 | 6.14E-02           | PSD3      | -          | 1.14E-07      | 9.91E-02 | 2.05E-07 | 1137    |                                 |
| 2     | rs6705773  | 2.21E+08 | 9.29E-01        | N/A      | 5     | rs6596352  | 1.36E+08 | 5.11E-01           | N/A       | -          | 1.14E-07      | 7.64E-01 | 1.33E-04 | 1138    |                                 |
| 2     | rs4675812  | 2.42E+08 | 7.38E-01        | FARP2    | 15    | rs17710001 | 51119600 | 4.74E-02           | N/A       | -          | 1.14E-07      | 2.57E-03 | 1.11E-02 | 1139    |                                 |
| 2     | rs11679686 | 11653488 | 9.49E-01        | GREB1    | 8     | rs1610131  | 1.35E+08 | 4.46E-01           | N/A       | -          | 1.14E-07      | 2.50E-01 | 1.70E-06 | 1140    |                                 |
| 1     | rs872171   | 2.16E+08 | 7.60E-01        | SPATA17  | 3     | rs1488109  | 1.7E+08  | 8.17E-01           | MECOM     | -          | 1.14E-07      | 6.38E-01 | 5.71E-05 | 1141    |                                 |
| 6     | rs6900659  | 1.06E+08 | 8.04E-01        | N/A      | 2     | rs6736615  | 1.63E+08 | 7.22E-03           | KCNH7     | -          | 1.14E-07      | 2.62E-01 | 6.37E-06 | 1142    |                                 |
| 6     | rs6916194  | 1.36E+08 | 7.45E-01        | PDE7B    | 19    | rs10408844 | 7195884  | 5.30E-01           | INSR      | -          | 1.14E-07      | 3.21E-01 | 2.87E-04 | 1143    |                                 |
| 1     | rs10857926 | 1.12E+08 | 4.25E-01        | N/A      | 19    | rs731826   | 55072670 | 5.41E-01           | AKT1S1    | -          | 1.14E-07      | 6.45E-01 | 6.37E-05 | 1144    |                                 |
| 5     | rs2269954  | 1.38E+08 | 8.02E-01        | BRD8     | 18    | rs1893152  | 2831862  | 7.81E-02           | EMILIN2   | -          | 1.14E-07      | 9.52E-01 | 1.46E-04 | 1145    |                                 |
| 6     | rs9395787  | 13552717 | 7.23E-01        | GFOD1    | 6     | rs12194555 | 1.19E+08 | 9.44E-01           | N/A       | -          | 1.14E-07      | 2.83E-01 | 2.54E-06 | 1146    |                                 |
| 1     | rs680925   | 66355709 | 3.11E-01        | PDE4B    | 1     | rs2073484  | 1.7E+08  | 3.24E-01           | N/A       | -          | 1.14E-07      | 7.88E-01 | 1.99E-05 | 1147    |                                 |
| 16    | rs2326282  | 83143633 | 1.81E-01        | COTL1    | 17    | rs232110   | 61109297 | 9.29E-01           | CCDC46    | -          | 1.14E-07      | 2.11E-02 | 1.17E-02 | 1148    |                                 |
| 16    | rs2326282  | 83143633 | 1.81E-01        | COTL1    | 17    | rs2321104  | 61106259 | 9.29E-01           | CCDC46    | -          | 1.14E-07      | 2.41E-02 | 1.06E-02 | 1149    |                                 |
| 5     | rs307176   | 6140464  | 4.26E-01        | N/A      | 5     | rs4117784  | 1.54E+08 | 8.70E-01           | LARP1     | -          | 1.15E-07      | 4.44E-01 | 1.07E-04 | 1150    |                                 |
| 6     | rs483366   | 1.62E+08 | 3.18E-01        | PARK2    | 8     | rs4740033  | 85925158 | 5.24E-01           | RALYL     | -          | 1.15E-07      | 2.64E-01 | 3.64E-07 | 1151    |                                 |
| 4     | rs1713985  | 57481207 | 3.75E-01        | REST     | 11    | rs4757841  | 19724190 | 8.89E-02           | NAV2      | -          | 1.15E-07      | 6.71E-01 | 7.74E-05 | 1152    |                                 |
| 6     | rs6911915  | 1.18E+08 | 1.66E-01        | DCBLD1   | 8     | rs6586746  | 18325984 | 2.70E-01           | N/A       | -          | 1.15E-07      | 8.33E-01 | 1.69E-05 | 1153    |                                 |
| 9     | rs10780849 | 89327729 | 3.43E-01        | DAPK1    | 12    | rs10082832 | 1.24E+08 | 4.76E-01           | DHX37     | -          | 1.15E-07      | 7.42E-01 | 7.66E-05 | 1154    |                                 |
| 13    | rs1171080  | 35385286 | 5.95E-01        | DCLK1    | 13    | rs9557474  | 1E+08    | 8.71E-01           | TMTC4     | -          | 1.15E-07      | 2.47E-01 | 3.58E-06 | 1155    |                                 |
| 5     | rs1229724  | 1.37E+08 | 3.71E-01        | SPOCK1   | 10    | rs973237   | 63195307 | 7.50E-01           | C10orf107 | -          | 1.16E-07      | 9.30E-01 | 2.69E-04 | 1156    |                                 |
| 13    | rs4885005  | 72002057 | 9.00E-01        | N/A      | 14    | rs2180388  | 1E+08    | 1.75E-01           | N/A       | -          | 1.16E-07      | 7.96E-02 | 5.00E-07 | 1157    |                                 |
| 8     | rs11785815 | 59472940 | 1.94E-01        | UBXN2B   | 20    | rs6126251  | 49597547 | 2.43E-01           | NFATC2    | -          | 1.16E-07      | 2.05E-01 | 4.35E-07 | 1158    |                                 |
| 16    | rs2326282  | 83143633 | 1.81E-01        | COTL1    | 17    | rs232150   | 61131964 | 8.00E-01           | CCDC46    | -          | 1.16E-07      | 4.09E-02 | 1.46E-02 | 1159    |                                 |
| 5     | rs1506174  | 40169821 | 1.82E-01        | N/A      | 17    | rs6503080  | 7944237  | 6.92E-01           | N/A       | -          | 1.16E-07      | 6.12E-01 | 6.17E-05 | 1160    |                                 |
| 2     | rs7558031  | 1.93E+08 | 4.84E-02        | N/A      | 8     | rs7159     | 1.24E+08 | 9.22E-01           | DERL1     | -          | 1.16E-07      | 2.83E-01 | 9.69E-07 | 1161    |                                 |
| 2     | rs7558031  | 1.93E+08 | 4.84E-02        | N/A      | 8     | rs7824629  | 1.24E+08 | 9.22E-01           | DERL1     | -          | 1.16E-07      | N/A      | N/A      | 1162    |                                 |
| 4     | rs4833022  | 37927687 | 8.23E-01        | N/A      | 8     | rs2163372  | 1.26E+08 | 6.16E-01           | MTSS1     | -          | 1.16E-07      | 8.44E-01 | 3.99E-05 | 1163    |                                 |
| 8     | rs2981060  | 70121659 | 5.30E-01        | N/A      | 14    | rs7160423  | 99369996 | 6.39E-01           | EML1      | -          | 1.17E-07      | 5.85E-01 | 1.12E-04 | 1164    |                                 |
| 8     | rs352774   | 15692048 | 8.87E-01        | N/A      | 18    | rs8093852  | 68855454 | 1.39E-01           | N/A       | -          | 1.17E-07      | 6.34E-01 | 5.58E-06 | 1165    |                                 |
| 3     | rs938115   | 1.18E+08 | 8.50E-01        | N/A      | 14    | rs2877489  | 22300914 | 9.64E-01           | SLC7A7    | -          | 1.17E-07      | 3.09E-01 | 2.14E-06 | 1166    |                                 |
| 5     | rs295209   | 94349360 | 8.59E-01        | MCTP1    | 9     | rs2230806  | 1.07E+08 | 6.23E-01           | ABCA1     | -          | 1.17E-07      | 8.12E-01 | 6.73E-05 | 1167    |                                 |
| 2     | rs698811   | 44557180 | 8.42E-01        | C2orf34  | 3     | rs10933671 | 1.96E+08 | 7.25E-01           | GP5       | -          | 1.17E-07      | 7.68E-01 | 1.42E-04 | 1168    |                                 |
| 5     | rs1353103  | 25036316 | 4.67E-01        | N/A      | 9     | rs4977871  | 23633682 | 9.19E-01           | N/A       | -          | 1.17E-07      | N/A      | N/A      | 1169    |                                 |
| 5     | rs7711285  | 25032921 | 4.67E-01        | N/A      | 9     | rs4977871  | 23633682 | 9.19E-01           | N/A       | -          | 1.17E-07      | N/A      | N/A      | 1170    |                                 |
| 2     | rs13011280 | 1.39E+08 | 1.77E-01        | N/A      | 20    | rs6139963  | 6243914  | 3.24E-01           | N/A       | -          | 1.17E-07      | 8.41E-01 | 7.56E-06 | 1171    |                                 |
| 6     | rs2269646  | 1.13E+08 | 3.23E-01        | LAMA4    | 2     | rs12995942 | 16226902 | 7.82E-01           | N/A       | -          | 1.17E-07      | 2.02E-01 | 1.19E-04 | 1172    |                                 |
| 3     | rs7613069  | 10600996 | 5.88E-01        | N/A      | 14    | rs2242542  | 21740815 | 8.39E-02           | N/A       | -          | 1.17E-07      | 7.60E-01 | 3.28E-04 | 1173    |                                 |
| 3     | rs2622717  | 1.39E+08 | 3.26E-01        | N/A      | 8     | rs1500906  | 96601801 | 1.79E-01           | N/A       | -          | 1.17E-07      | 1.51E-01 | 2.23E-03 | 1174    |                                 |
| 3     | rs2622717  | 1.39E+08 | 3.26E-01        | N/A      | 8     | rs1500909  | 96602267 | 1.79E-01           | N/A       | -          | 1.17E-07      | 1.51E-01 | 2.23E-03 | 1175    |                                 |
| 10    | rs2478425  | 1.22E+08 | 9.97E-01        | PPAPDC1A | 20    | rs6106298  | 20791441 | 2.43E-01           | N/A       | -          | 1.17E-07      | 5.73E-01 | 4.69E-05 | 1176    |                                 |
| 6     | rs9380215  | 31157634 | 4.29E-02        | N/A      | 8     | rs3868542  | 31253818 | 6.85E-02           | TCF19     | MHC        | 1.17E-07      | 5.03E-02 | 3.08E-07 | 1177    |                                 |
| 5     | rs10071906 | 1.16E+08 | 4.18E-01        | COMMD10  | 16    | rs7240382  | 72579628 | 1.92E-01           | N/A       | -          | 1.17E-07      | 6.71E-01 | 1.38E-05 | 1178    |                                 |
| 2     | rs4669614  | 10792122 | 5.50E-02        | ATP6V1C2 | 3     | rs2168718  | 14059158 | 2.27E-01           | TPRXL     | -          | 1.18E-07      | 2.08E-01 | 1.16E-04 | 1179    |                                 |
| 4     | rs4291161  | 12535092 | 2.80E-01        | N/A      | 19    | rs2074879  | 13233589 | 5.33E-01           | CACNA1A   | -          | 1.18E-07      | 2.83E-01 | 4.43E-04 | 1180    |                                 |
| 10    | rs4511241  | 61879261 | 7.19E-01        | N/A      | 14    | rs10133355 | 25788992 | 2.88E-01           | N/A       | -          | 1.18E-07      | 6.28E-01 | 1.97E-04 | 1181    |                                 |
| 9     | rs10820441 | 1.05E+08 | 2.55E-01        | N/A      | 12    | rs4246220  | 23998069 | 8.42E-01           | SOX5      | -          | 1.18E-07      | 8.67E-01 | 3.59E-05 | 1182    |                                 |
| 2     | rs13407074 | 2.35E+08 | 4.89E-01        | ARL4C    | 8     | rs11986435 | 1.17E+08 | 3.20E-02           | N/A       | -          | 1.18E-07      | 6.57E-01 | 1.58E-05 | 1183    |                                 |
| 8     | rs7006696  | 1.19E+08 | 2.58E-01        | EXT1     | 21    | rs989554   | 38708797 | 6.64E-01           | ERG       | -          | 1.18E-07      | 9.82E-01 | 8.65E-05 | 1184    |                                 |
| 5     | rs6896019  | 1.16E+08 | 4.58E-01        | COMMD10  | 18    | rs7240382  | 72579628 | 1.92E-01           | N/A       | -          | 1.18E-07      | 6.71E-01 | 1.37E-05 | 1185    |                                 |
| 6     | rs11155954 | 1.55E+08 | 4.51E-03        | IPCEF1   | 3     | rs9881504  | 1.97E+08 | 7.17E-01           | N/A       | -          | 1.18E-07      | 9.06E-01 | 4.80E-05 | 1186    |                                 |
| 6     | rs397139   | 1.33E+08 | 4.13E-01        | N/A      | 16    | rs1697509  | 83577116 | 7.46E-01           | ZDHHC7    | -          | 1.19E-07      | 8.90E-02 | 2.46E-03 | 1187    |                                 |
| 9     | rs7868963  | 7937001  | 1.76E-01        | N/A      | 11    | rs4754875  | 96022834 | 4.42E-01           | N/A       | -          | 1.19E-07      | 9.36E-02 | 1.45E-03 | 1188    |                                 |
| 6     | rs525153   | 1.33E+08 | 4.13E-01        | N/A      | 16    | rs1697509  | 83577116 | 7.46E-01           | ZDHHC7    | -          | 1.19E-07      | 1.06E-01 | 2.03E-03 | 1189    |                                 |
| 3     | rs11711597 | 1.43E+08 | 7.57E-01        | RASA2    | 20    | rs6131220  | 11421716 | 6.47E-01           | N/A       | -          | 1.19E-07      | 7.10E-02 | 3.32E-07 | 1190    |                                 |

| SNP A |            |          |                 |           | SNP B |           |          |                    |          | MHC region | Interaction P |            |          | Ranking | Cluster in top 100 interactions |
|-------|------------|----------|-----------------|-----------|-------|-----------|----------|--------------------|----------|------------|---------------|------------|----------|---------|---------------------------------|
| CHR   | SNP        | Location | gle locus P val | Gene      | CHR   | SNP       | Location | single locus P val | Gene     |            | Stage 1       | Stage 2    | Combined |         |                                 |
| 1     | rs2336645  | 1.08E+08 | 2.56E-01        | VAV3      | 17    | s12452093 | 29114217 | 5.70E-01           | ACCN1    | -          | 1.22E-07      | 2.60E-01   | 2.70E-06 | 1231    |                                 |
| 7     | rs174930   | 29835729 | 8.43E-03        | WIPF3     | 11    | rs1012849 | 1.23E+08 | 8.08E-01           | N/A      | -          | 1.22E-07      | 5.79E-01   | 7.66E-06 | 1232    |                                 |
| 18    | rs1940659  | 2019423  | 3.51E-01        | N/A       | 19    | s10424255 | 51750826 | 3.01E-01           | N/A      | -          | 1.22E-07      | 6.15E-01   | 2.03E-04 | 1233    |                                 |
| 9     | rs10819907 | 97938109 | 8.46E-01        | N/A       | 12    | rs1196883 | 1.04E+08 | 6.59E-01           | KIAA1033 | -          | 1.22E-07      | 7.91E-01   | 6.58E-05 | 1234    |                                 |
| 2     | rs976904   | 1.33E+08 | 1.22E-01        | NCKAP5    | 11    | s11215687 | 1.15E+08 | 5.15E-01           | N/A      | -          | 1.22E-07      | 9.95E-01   | 1.12E-05 | 1235    |                                 |
| 1     | rs827497   | 97467030 | 9.20E-01        | DPYD      | 9     | s10966455 | 24760659 | 3.09E-02           | N/A      | -          | 1.22E-07      | 1.56E-01   | 1.12E-03 | 1236    |                                 |
| 5     | rs295209   | 94349360 | 8.59E-01        | MCTP1     | 9     | rs2253174 | 1.07E+08 | 6.17E-01           | ABCA1    | -          | 1.22E-07      | 8.12E-01   | 6.97E-05 | 1237    |                                 |
| 6     | rs1199389  | 8336115  | 7.69E-01        | N/A       | 17    | rs236525  | 65725420 | 9.55E-01           | N/A      | -          | 1.22E-07      | 1.32E-01   | 1.05E-03 | 1238    |                                 |
| 2     | rs2241736  | 47040897 | 1.38E-01        | TTC7A     | 12    | rs7304239 | 73840326 | 3.77E-01           | KCNC2    | -          | 1.22E-07      | 4.82E-01   | 1.27E-06 | 1239    |                                 |
| 14    | rs736348   | 36859223 | 7.24E-01        | CPNE5     | 5     | rs6891999 | 75585263 | 8.20E-01           | SV2C     | MHC        | 1.22E-07      | 7.45E-01   | 1.26E-05 | 1240    |                                 |
| 16    | rs4900251  | 94361899 | 6.38E-01        | N/A       | 16    | rs4129044 | 6841514  | 8.11E-01           | A2BP1    | -          | 1.23E-07      | 8.47E-02   | 1.75E-07 | 1241    |                                 |
| 5     | rs17745927 | 1.7E+08  | 9.72E-01        | KCNIP1    | 7     | rs1109552 | 1.28E+08 | 8.96E-01           | FAM71F2  | -          | 1.23E-07      | 2.37E-01   | 1.89E-06 | 1242    |                                 |
| 5     | rs1875972  | 1.68E+08 | 1.33E-01        | SLIT3     | 10    | s10764706 | 27874675 | 3.89E-01           | RAB18    | -          | 1.23E-07      | 4.39E-01   | 2.70E-06 | 1243    |                                 |
| 8     | rs2981060  | 70121659 | 5.30E-01        | N/A       | 14    | rs3783324 | 99419770 | 8.71E-01           | EML1     | -          | 1.23E-07      | 6.01E-01   | 9.09E-05 | 1244    |                                 |
| 5     | rs11960332 | 1.8E+08  | 6.87E-01        | FLT4      | 12    | s12229875 | 52458569 | 1.62E-01           | N/A      | -          | 1.23E-07      | 4.26E-01   | 1.38E-06 | 1245    |                                 |
| 10    | rs755228   | 76499380 | 8.99E-01        | DUPD1     | 12    | rs1317389 | 1.02E+08 | 9.37E-01           | C12orf42 | -          | 1.23E-07      | 7.57E-01   | 2.40E-05 | 1246    |                                 |
| 6     | rs2747690  | 1.64E+08 | 7.58E-01        | PACRG     | 12    | rs7294540 | 1769975  | 3.23E-01           | ADIPOR2  | -          | 1.23E-07      | 8.81E-01   | 1.75E-05 | 1247    |                                 |
| 6     | rs4715607  | 56264084 | 2.92E-01        | N/A       | 16    | s12148995 | 12755335 | 1.10E-01           | CPPED1   | -          | 1.23E-07      | 9.52E-01   | 1.39E-05 | 1248    |                                 |
| 4     | rs1105889  | 1.54E+08 | 5.31E-01        | FHDC1     | 14    | rs9671696 | 1.05E+08 | 3.73E-01           | MTA1     | -          | 1.23E-07      | 3.60E-01   | 8.56E-04 | 1249    |                                 |
| 14    | rs11157994 | 53521052 | 6.80E-01        | N/A       | 18    | rs7244678 | 11987197 | 3.75E-01           | IMPA2    | -          | 1.23E-07      | 5.22E-01   | 6.92E-06 | 1250    |                                 |
| 11    | rs4980704  | 69501109 | 3.49E-01        | N/A       | 13    | rs7329410 | 28122208 | 2.58E-01           | POMP     | -          | 1.23E-07      | 8.67E-01   | 2.78E-05 | 1251    |                                 |
| 11    | rs4980704  | 69501109 | 3.49E-01        | N/A       | 13    | rs8002632 | 28120286 | 2.58E-01           | POMP     | -          | 1.23E-07      | 8.67E-01   | 2.78E-05 | 1252    |                                 |
| 5     | rs4484406  | 77280768 | 3.52E-01        | N/A       | 10    | s12778872 | 89346913 | 6.02E-01           | N/A      | -          | 1.23E-07      | 1.35E-01   | 1.66E-03 | 1253    |                                 |
| 6     | rs9378310  | 1671161  | 4.51E-02        | GMDS      | 2     | s10193292 | 13285236 | 4.63E-01           | N/A      | -          | 1.23E-07      | 4.40E-01   | 4.18E-04 | 1254    |                                 |
| 6     | rs9378310  | 1671161  | 4.51E-02        | GMDS      | 2     | rs2046266 | 13284325 | 4.63E-01           | N/A      | -          | 1.23E-07      | 4.40E-01   | 4.18E-04 | 1255    |                                 |
| 8     | rs626913   | 61711048 | 5.84E-01        | RAB2A     | 9     | rs7858618 | 18997561 | 4.33E-01           | FAM154A  | -          | 1.23E-07      | N/A        | N/A      | 1256    |                                 |
| 1     | rs3002303  | 2.13E+08 | 8.18E-01        | PTPN14    | 13    | s11069721 | 1.08E+08 | 5.06E-02           | N/A      | -          | 1.24E-07      | 6.75E-01   | 1.10E-04 | 1257    |                                 |
| 10    | rs10824414 | 77834518 | 7.60E-01        | C10orf11  | 11    | rs670342  | 78329325 | 9.25E-01           | ODZ4     | -          | 1.24E-07      | N/A        | N/A      | 1258    |                                 |
| 3     | rs9843440  | 1.86E+08 | 2.04E-01        | EHADH     | 10    | rs6993070 | 1.25E+08 | 8.97E-01           | N/A      | -          | 1.24E-07      | 1.49E-01   | 4.88E-04 | 1259    |                                 |
| 3     | rs6804571  | 7111588  | 6.13E-01        | GRM7      | 12    | rs1565728 | 75952082 | 6.02E-01           | E2F7     | -          | 1.24E-07      | 8.90E-01   | 8.26E-06 | 1260    |                                 |
| 1     | rs1874930  | 63279983 | 3.78E-01        | N/A       | 8     | rs1209992 | 13168685 | 5.37E-01           | DLC1     | -          | 1.24E-07      | 3.03E-02   | 3.55E-07 | 1261    |                                 |
| 3     | rs2712353  | 1.15E+08 | 5.03E-01        | ATP6V1A   | 12    | s10841535 | 20493515 | 4.33E-01           | PDE3A    | -          | 1.24E-07      | 1.73E-01   | 2.69E-03 | 1262    |                                 |
| 17    | rs946496   | 1.26E+08 | 9.27E-01        | KIRREL3   | 16    | rs4785358 | 48397283 | 1.14E-01           | ZNF423   | -          | 1.24E-07      | 5.04E-01   | 1.27E-05 | 1263    |                                 |
| 1     | rs3002297  | 2.13E+08 | 7.72E-01        | PTPN14    | 13    | s12584295 | 1.08E+08 | 7.00E-02           | N/A      | -          | 1.24E-07      | 6.30E-01   | 1.21E-04 | 1264    |                                 |
| 1     | rs17115070 | 96628806 | 8.62E-01        | N/A       | 5     | rs931454  | 67287006 | 9.75E-01           | N/A      | -          | 1.24E-07      | 3.20E-01   | 5.07E-04 | 1265    |                                 |
| 6     | rs4707585  | 9076371  | 8.82E-01        | N/A       | 1     | s12037071 | 77672382 | 4.42E-01           | AK5      | -          | 1.24E-07      | 7.46E-02   | 3.28E-03 | 1266    |                                 |
| 8     | rs10957052 | 59472451 | 1.72E-01        | UXN2B     | 20    | rs6126251 | 49597547 | 2.43E-01           | NFATC2   | -          | 1.24E-07      | 2.04E-01   | 4.65E-07 | 1267    |                                 |
| 1     | rs12409333 | 65190427 | 5.81E-01        | JAB1      | 3     | rs6795065 | 1.54E+08 | 2.79E-01           | N/A      | -          | 1.24E-07      | 3.07E-01   | 9.23E-06 | 1268    |                                 |
| 1     | rs4915675  | 65200064 | 5.81E-01        | JAK1      | 3     | rs6795065 | 1.54E+08 | 2.79E-01           | N/A      | -          | 1.24E-07      | 3.07E-01   | 9.23E-06 | 1269    |                                 |
| 1     | rs7553101  | 65192778 | 5.81E-01        | JAK1      | 3     | rs6795065 | 1.54E+08 | 2.79E-01           | N/A      | -          | 1.24E-07      | 3.07E-01   | 9.23E-06 | 1270    |                                 |
| 1     | rs7546545  | 65196548 | 5.81E-01        | JAK1      | 3     | rs6795065 | 1.54E+08 | 2.79E-01           | N/A      | -          | 1.24E-07      | 3.28E-01   | 1.03E-05 | 1271    |                                 |
| 6     | rs2882694  | 74574401 | 9.53E-01        | CD109     | 21    | rs1625694 | 21975417 | 8.49E-01           | N/A      | -          | 1.24E-07      | 3.85E-01   | 6.93E-06 | 1272    |                                 |
| 5     | rs2089192  | 1.7E+08  | 5.56E-01        | KCNIP1    | 11    | s11234874 | 86306884 | 6.83E-01           | N/A      | -          | 1.24E-07      | 8.47E-01   | 7.90E-05 | 1273    |                                 |
| 7     | rs968141   | 53769374 | 4.90E-01        | N/A       | 7     | rs2140878 | 1.23E+08 | 2.02E-01           | IQB      | -          | 1.24E-07      | 3.41E-02   | 1.37E-07 | 1274    |                                 |
| 2     | rs11890872 | 52111013 | 2.63E-02        | N/A       | 3     | s10937161 | 1.85E+08 | 6.88E-01           | HTR3D    | -          | 1.24E-07      | 4.25E-01   | 1.44E-04 | 1275    |                                 |
| 5     | rs17745927 | 1.7E+08  | 9.72E-01        | KCNIP1    | 11    | s11234874 | 86306884 | 6.83E-01           | N/A      | -          | 1.24E-07      | 6.28E-01   | 4.77E-04 | 1276    |                                 |
| 7     | rs968141   | 53769374 | 4.90E-01        | N/A       | 7     | rs7779352 | 1.23E+08 | 2.02E-01           | IQB      | -          | 1.24E-07      | 6.71E-01   | 2.23E-04 | 1277    |                                 |
| 6     | rs2844665  | 31114834 | 8.49E-01        | HCG22     | 6     | rs9368675 | 31380136 | 7.91E-01           | N/A      | MHC        | 1.24E-07      | 6.71E-01   | 2.23E-04 | 1278    |                                 |
| 6     | rs6932930  | 34785081 | 2.64E-01        | C6orf106  | 5     | rs2338637 | 72037229 | 8.11E-02           | N/A      | MHC        | 1.25E-07      | 4.94E-01   | 1.03E-06 | 1279    |                                 |
| 9     | rs7857883  | 1.26E+08 | 7.53E-01        | N/A       | 15    | rs1372839 | 96622820 | 2.25E-01           | N/A      | -          | 1.25E-07      | 7.17E-01   | 1.80E-05 | 1280    |                                 |
| 13    | rs828187   | 90129301 | 8.25E-01        | N/A       | 15    | rs6576636 | 24634499 | 6.05E-01           | N/A      | -          | 1.25E-07      | 2.74E-02   | 1.31E-06 | 1281    |                                 |
| 9     | rs12682705 | 20508923 | 9.59E-02        | MLLT3     | 14    | s12887476 | 26929914 | 9.96E-02           | N/A      | -          | 1.25E-07      | 2.55E-01   | 7.27E-04 | 1282    |                                 |
| 14    | rs910795   | 22702346 | 3.98E-01        | SLC7A8    | 22    | rs382013  | 16656101 | 3.48E-01           | BID      | -          | 1.25E-07      | 8.92E-02   | 9.26E-04 | 1283    |                                 |
| 1     | rs2383513  | 1.85E+08 | 7.84E-01        | N/A       | 5     | rs7715102 | 2427305  | 5.42E-01           | N/A      | -          | 1.25E-07      | 3.30E-01   | 2.63E-06 | 1284    |                                 |
| 12    | rs7970351  | 5191067  | 9.81E-01        | N/A       | 17    | rs8080666 | 59840612 | 8.26E-01           | N/A      | -          | 1.25E-07      | 7.12E-01   | 2.50E-04 | 1285    |                                 |
| 2     | rs6707657  | 33748322 | 6.15E-01        | N/A       | 5     | rs2591724 | 33867772 | 1.12E-01           | ADAMTS12 | -          | 1.25E-07      | 7.58E-01   | 8.78E-06 | 1286    |                                 |
| 1     | rs2996016  | 41633970 | 2.03E-01        | N/A       | 12    | rs4019549 | 93503803 | 5.98E-01           | TMCC3    | -          | 1.25E-07      | 9.95E-01   | 8.00E-05 | 1287    |                                 |
| 1     | rs326910   | 96624140 | 9.19E-01        | N/A       | 5     | rs931454  | 67287006 | 9.75E-01           | N/A      | -          | 1.25E-07      | 3.40E-01   | 5.49E-04 | 1288    |                                 |
| 5     | rs4145160  | 1.53E+08 | 6.37E-01        | GRIA1     | 8     | rs2673557 | 1.34E+08 | 1.26E-01           | KCNQ3    | -          | 1.25E-07      | 6.20E-01   | 5.61E-05 | 1289    |                                 |
| 1     | rs11161944 | 87427396 | 7.61E-01        | LOC339524 | 16    | rs7359414 | 302639   | 5.67E-01           | AXIN1    | -          | 1.26E-07      | 6.60E-02   | 6.79E-04 | 1290    |                                 |
| 5     | rs2968019  | 58380905 | 8.06E-01        | PDE4D     | 18    | rs9319948 | 55193376 | 1.06E-01           | LMAN1    | -          | 1.26E-07      | 4.42E-01   | 2.29E-06 | 1291    |                                 |
| 6     | rs157695   | 91275194 | 1.31E-01        | MAP3K7    | 7     | rs2344701 | 1.33E+08 | 2.79E-01           | N/A      | -          | 1.26E-07      | 5.55E-01   | 7.62E-05 | 1292    |                                 |
| 1     | rs2276401  | 1.57E+08 | 7.22E-01        | SPTA1     | 21    | s12626903 | 32046986 | 7.18E-01           | N/A      | -          | 1.26E-07      | 4.00E-01   | 2.74E-06 | 1293    |                                 |
| 1     | rs10754178 | 1.94E+08 | 9.18E-01        | N/A       | 2     | rs3771494 | 70578860 | 2.49E-01           | TGFA     | -          | 1.26E-07      | 3.99E-01   | 4.12E-05 | 1294    |                                 |
| 3     | rs2366672  | 1.94E+08 | 6.44E-02        | FGF12     | 15    | rs631864  | 68163495 | 4.95E-01           | TLE3     | -          | 1.27E-07      | N/A        | N/A      | 1295    |                                 |
| 2     | rs4663126  | 2.35E+08 | 4.68E-02        | N/A       | 13    | rs7140044 | 23927295 | 5.66E-01           | PARP4    | -          | 1.27E-07      | 3.96E-02   | 1.67E-07 | 1296    |                                 |
| 1     | rs556596   | 28281983 | 6.43E-02        | EYA3      | 19    | rs1870071 | 16366106 | 3.56E-01           | EPS15L1  | -          | 1.27E-07      | 6.23E-01   | 3.41E-05 | 1297    |                                 |
| 5     | rs4921132  | 1.6E+08  | 8.00E-02        | C1QTNF3   | 7     | rs993191  | 1.42E+08 | 8.93E-01           | TRYX3    | -          | 1.27E-07      | 9.83E-01   | 1.92E-05 | 1298    |                                 |
| 5     | rs17079868 | 1.79E+08 | 1.86E-01        | RNF130    | 11    | s11605215 | 30399824 | 1.62E-01           | MPPED2   | -          | 1.27E-07      | 6.91E-01   | 3.04E-05 | 1299    |                                 |
| 6     | rs2517552  | 31115569 | 8.54E-01        | HCG22     | 6     | rs9368675 | 31380136 | 7.91E-01           | N/A      | MHC        | 1.27E-07      | 6.45E-01   | 1.29E-05 | 1300    |                                 |
| 6     | rs4710491  | 62565148 | 8.98E-01        | KHDRBS2   | 2     | rs2421916 | 63301186 | 3.38E-01           | C2orf86  | -          | 1.28E-07      | 5.32E-01   | 3.02E-04 | 1301    |                                 |
| 6     | rs9395787  | 13552717 | 7.23E-01        | GFOD1     | 6     | rs6906287 | 1.19E+08 | 8.61E-01           | N/A      | -          | 1.28E-07      | 1.82E-01</ |          |         |                                 |









| SNP A |            |          |                         |              | SNP B |            |          |                         |           | Interaction P |          |          | Ranking  | Cluster in top 100 interactions |  |
|-------|------------|----------|-------------------------|--------------|-------|------------|----------|-------------------------|-----------|---------------|----------|----------|----------|---------------------------------|--|
| CHR   | SNP        | Location | log <sub>10</sub> P val | Gene         | CHR   | SNP        | Location | log <sub>10</sub> P val | Gene      | MHC region    | Stage 1  | Stage 2  | Combined |                                 |  |
| 4     | rs17725302 | 1.78E+08 | 6.09E-01                | N/A          | 5     | rs1582416  | 1.43E+08 | 7.86E-01                | N/A       | -             | 1.67E-07 | 1.44E-01 | 4.17E-07 | 1791                            |  |
| 3     | rs899983   | 1.39E+08 | 3.57E-01                | N/A          | 8     | rs1500906  | 96601801 | 1.79E-01                | N/A       | -             | 1.67E-07 | 1.86E-01 | 2.26E-03 | 1792                            |  |
| 3     | rs899983   | 1.39E+08 | 3.57E-01                | N/A          | 8     | rs1500909  | 96602267 | 1.79E-01                | N/A       | -             | 1.67E-07 | 1.86E-01 | 2.26E-03 | 1793                            |  |
| 8     | rs10092844 | 72375844 | 9.01E-01                | EYA1         | 15    | rs9920560  | 58835222 | 5.46E-01                | RORA      | -             | 1.67E-07 | 4.41E-01 | 4.77E-06 | 1794                            |  |
| 5     | rs6877153  | 1.22E+08 | 8.47E-01                | SNCAIP       | 11    | rs11037211 | 43006402 | 8.33E-01                | N/A       | -             | 1.67E-07 | 8.84E-01 | 2.29E-05 | 1795                            |  |
| 11    | rs1124847  | 56712658 | 3.71E-01                | LRRCS5       | 16    | rs1345872  | 72058301 | 6.68E-01                | N/A       | -             | 1.67E-07 | 5.71E-01 | 6.98E-04 | 1796                            |  |
| 4     | rs1373747  | 41067359 | 3.26E-01                | LMCH1        | 19    | rs16979595 | 50169221 | 7.74E-01                | CLPTM1    | -             | 1.67E-07 | 2.10E-01 | 7.67E-04 | 1797                            |  |
| 6     | rs3130473  | 31307187 | 2.29E-01                | N/A          | 6     | rs7743761  | 31444079 | 8.81E-01                | HLA-B     | MHC           | 1.67E-07 | 8.02E-01 | 4.17E-05 | 1798                            |  |
| 3     | rs1870709  | 1.17E+08 | 3.37E-01                | LSAMP        | 8     | rs6984840  | 10169975 | 9.13E-01                | MSRA      | -             | 1.68E-07 | 5.71E-01 | 1.57E-04 | 1799                            |  |
| 1     | rs11203366 | 17530121 | 9.93E-03                | PADI4        | 13    | rs481792   | 71834251 | 7.43E-01                | N/A       | -             | 1.68E-07 | 5.97E-01 | 1.42E-04 | 1800                            |  |
| 7     | rs13239224 | 35360576 | 2.86E-02                | N/A          | 8     | rs2613646  | 1.43E+08 | 9.44E-01                | FLJ43860  | -             | 1.68E-07 | 6.10E-01 | 2.80E-04 | 1801                            |  |
| 9     | rs7029452  | 74397149 | 3.15E-02                | TMC1         | 17    | rs2323661  | 15241034 | 1.56E-01                | N/A       | -             | 1.68E-07 | 3.87E-01 | 1.64E-03 | 1802                            |  |
| 1     | rs7550122  | 1.06E+08 | 1.03E-01                | N/A          | 10    | rs1082679  | 30683878 | 9.60E-01                | LOC729668 | -             | 1.68E-07 | 8.27E-01 | 5.86E-05 | 1803                            |  |
| 4     | rs1550057  | 1.42E+08 | 8.62E-01                | N/A          | 16    | rs11642883 | 81629115 | 1.95E-01                | CDH13     | -             | 1.68E-07 | 1.32E-01 | 9.03E-07 | 1804                            |  |
| 6     | rs9384086  | 1.54E+08 | 3.79E-01                | N/A          | 10    | rs1914191  | 64032229 | 6.47E-01                | ZNF365    | -             | 1.68E-07 | 4.21E-01 | 1.74E-04 | 1805                            |  |
| 1     | rs7417097  | 8916454  | 6.73E-01                | CA6          | 8     | rs2949554  | 88121048 | 6.90E-01                | CNBD1     | -             | 1.68E-07 | 6.67E-01 | 3.59E-05 | 1806                            |  |
| 2     | rs4605324  | 29895170 | 3.52E-01                | ALK          | 4     | rs1447284  | 5138454  | 9.87E-03                | STK32B    | -             | 1.68E-07 | 3.34E-01 | 2.90E-06 | 1807                            |  |
| 3     | rs9872768  | 1.48E+08 | 1.86E-01                | N/A          | 8     | rs1879571  | 20918847 | 2.88E-01                | N/A       | -             | 1.68E-07 | 2.66E-01 | 1.52E-06 | 1808                            |  |
| 1     | rs1710139  | 10767145 | 5.13E-01                | CASZ1        | 5     | rs10512948 | 8286351  | 8.91E-02                | N/A       | -             | 1.68E-07 | 8.92E-01 | 7.92E-05 | 1809                            |  |
| 6     | rs9295957  | 31265572 | 2.18E-01                | POU5F1       | 6     | rs396243   | 31383153 | 2.17E-01                | N/A       | MHC           | 1.68E-07 | 8.20E-01 | 2.48E-05 | 1810                            |  |
| 6     | rs9271568  | 32698441 | 6.10E-01                | HLA-DQA1     | 19    | rs6512102  | 16315110 | 8.67E-01                | EPS15L1   | MHC           | 1.69E-07 | 3.76E-01 | 7.33E-04 | 1811                            |  |
| 2     | rs13409846 | 2.19E+08 | 2.63E-01                | PNKD         | 4     | rs2292837  | 1.4E+08  | 2.54E-01                | ELF2      | -             | 1.69E-07 | 4.24E-01 | 2.43E-04 | 1812                            |  |
| 2     | rs2627857  | 66155597 | 9.35E-01                | N/A          | 8     | rs2166646  | 1.59E+08 | 1.59E-01                | N/A       | -             | 1.69E-07 | 6.94E-01 | 5.23E-05 | 1813                            |  |
| 5     | rs6452143  | 23756112 | 3.87E-01                | N/A          | 10    | rs4748247  | 16167568 | 5.20E-01                | N/A       | -             | 1.69E-07 | N/A      | N/A      | 1814                            |  |
| 10    | rs2804503  | 33694722 | 1.37E-01                | N/A          | 18    | rs1367865  | 48215053 | 8.55E-01                | DCC       | -             | 1.69E-07 | 5.90E-01 | 1.29E-04 | 1815                            |  |
| 5     | rs988364   | 59247667 | 2.68E-03                | PDE4D        | 7     | rs12670356 | 81840844 | 5.95E-01                | CACNA2D1  | -             | 1.69E-07 | 1.78E-01 | 5.13E-04 | 1816                            |  |
| 9     | rs1096720C | 26093057 | 9.42E-01                | N/A          | 9     | rs10869977 | 79647096 | 1.83E-01                | GN/AQ     | -             | 1.69E-07 | 2.55E-01 | 2.39E-06 | 1817                            |  |
| 6     | rs6922684  | 1.5E+08  | 8.87E-01                | PPP1R14C     | 9     | rs1078077  | 88373314 | 7.97E-01                | N/A       | -             | 1.69E-07 | 2.22E-01 | 8.82E-04 | 1818                            |  |
| 5     | rs346660   | 1.36E+08 | 2.88E-01                | N/A          | 17    | rs1358175  | 36011315 | 8.03E-01                | N/A       | -             | 1.69E-07 | 8.75E-01 | 1.21E-05 | 1819                            |  |
| 1     | rs535988   | 1.63E+08 | 6.38E-01                | N/A          | 8     | rs4876153  | 2291741  | 2.11E-01                | N/A       | -             | 1.69E-07 | N/A      | N/A      | 1820                            |  |
| 9     | rs7025302  | 91943342 | 2.76E-01                | N/A          | 19    | rs10408252 | 39694615 | 4.34E-02                | WTIP      | -             | 1.70E-07 | 6.65E-02 | 1.28E-03 | 1821                            |  |
| 4     | rs749493   | 1.75E+08 | 8.95E-01                | N/A          | 12    | rs10505892 | 23569819 | 9.11E-01                | SOX5      | -             | 1.70E-07 | 8.83E-01 | 9.41E-05 | 1822                            |  |
| 7     | rs10256077 | 2137976  | 4.92E-01                | MAD1L1       | 13    | rs4436648  | 22118204 | 4.36E-01                | N/A       | -             | 1.70E-07 | 3.64E-01 | 3.84E-04 | 1823                            |  |
| 3     | rs1559018  | 1.92E+08 | 9.42E-01                | IL1RAP       | 8     | rs4871724  | 1.28E+08 | 8.85E-03                | N/A       | -             | 1.70E-07 | 7.31E-01 | 1.77E-05 | 1824                            |  |
| 1     | rs11203366 | 17539095 | 1.03E-02                | PADI4        | 13    | rs481792   | 71834251 | 7.43E-01                | N/A       | -             | 1.70E-07 | 5.60E-01 | 1.62E-04 | 1825                            |  |
| 4     | rs1519313  | 1.87E+08 | 3.01E-03                | N/A          | 11    | rs7928596  | 81675813 | 7.26E-02                | N/A       | -             | 1.70E-07 | 3.06E-01 | 1.28E-04 | 1826                            |  |
| 1     | rs1501228  | 60680048 | 7.26E-02                | N/A          | 9     | rs1810887  | 1.34E+08 | 6.35E-01                | NTNG2     | -             | 1.70E-07 | 6.71E-01 | 7.03E-06 | 1827                            |  |
| 5     | rs1156684  | 1.21E+08 | 7.86E-01                | N/A          | 7     | rs10464415 | 1.54E+08 | 1.52E-01                | DDP6      | -             | 1.70E-07 | 1.81E-01 | 5.05E-06 | 1828                            |  |
| 5     | rs10043664 | 54464067 | 6.89E-01                | CDC20B       | 9     | rs1509186  | 1085922  | 8.28E-01                | N/A       | -             | 1.70E-07 | 2.67E-01 | 1.18E-03 | 1829                            |  |
| 5     | rs4703197  | 1.01E+08 | 9.53E-01                | N/A          | 12    | rs529446   | 5091580  | 5.54E-01                | N/A       | -             | 1.70E-07 | 1.41E-01 | 4.50E-07 | 1830                            |  |
| 1     | rs556596   | 28281983 | 6.43E-02                | EYA3         | 19    | rs11878602 | 16416153 | 3.89E-01                | EPS15L1   | -             | 1.70E-07 | 8.65E-01 | 1.19E-05 | 1831                            |  |
| 2     | rs10169420 | 1.83E+08 | 4.31E-01                | N/A          | 12    | rs1603572  | 82627746 | 9.51E-01                | N/A       | -             | 1.71E-07 | 1.57E-01 | 1.75E-06 | 1832                            |  |
| 3     | rs6791296  | 62406455 | 7.93E-01                | CADPS        | 20    | rs6126303  | 49740539 | 1.32E-01                | ATP9A     | -             | 1.71E-07 | 1.44E-01 | 2.42E-04 | 1833                            |  |
| 1     | rs12023371 | 1.57E+08 | 8.45E-01                | SPTA1        | 15    | rs415799   | 56478046 | 6.34E-01                | N/A       | -             | 1.71E-07 | 2.26E-01 | 6.76E-06 | 1834                            |  |
| 8     | rs7829982  | 23262643 | 9.83E-01                | LOXL2        | 12    | rs1077808  | 99760460 | 8.30E-01                | ANO4      | -             | 1.71E-07 | 2.35E-01 | 1.09E-06 | 1835                            |  |
| 11    | rs10891914 | 1.15E+08 | 8.34E-01                | N/A          | 13    | rs12585823 | 45434292 | 1.83E-01                | ZC3H13    | -             | 1.71E-07 | 5.91E-01 | 3.07E-04 | 1836                            |  |
| 3     | rs563275   | 1.89E+08 | 9.63E-01                | N/A          | 20    | rs2206641  | 19445646 | 2.63E-01                | SLC24A3   | -             | 1.71E-07 | 6.28E-02 | 2.31E-03 | 1837                            |  |
| 13    | rs1171080  | 35385286 | 5.95E-01                | DCLK1        | 13    | rs9518128  | 1E+08    | 8.21E-01                | TMTC4     | -             | 1.71E-07 | 1.52E-01 | 2.14E-06 | 1838                            |  |
| 2     | rs13415138 | 46935055 | 2.36E-01                | LOC100134259 | 3     | rs4685976  | 5716702  | 9.71E-01                | N/A       | -             | 1.71E-07 | 8.79E-01 | 3.00E-05 | 1839                            |  |
| 4     | rs7686686  | 1.11E+08 | 3.40E-01                | N/A          | 5     | rs13169504 | 1.62E+08 | 3.04E-01                | N/A       | -             | 1.71E-07 | 3.76E-01 | 4.50E-06 | 1840                            |  |
| 6     | rs1750603  | 94958120 | 1.09E-02                | N/A          | 10    | rs2565190  | 42850077 | 7.6E-01                 | N/A       | -             | 1.71E-07 | 3.38E-01 | 1.41E-06 | 1841                            |  |
| 2     | rs532290   | 1.35E+08 | 6.84E-01                | TMEM163      | 10    | rs6602096  | 16405073 | 8.34E-01                | N/A       | -             | 1.71E-07 | 5.98E-01 | 1.08E-04 | 1842                            |  |
| 5     | rs6451438  | 39673322 | 1.26E-01                | N/A          | 9     | rs10971632 | 33655229 | 6.52E-01                | PTENP1    | -             | 1.71E-07 | 7.09E-02 | 1.70E-03 | 1843                            |  |
| 10    | rs2025468  | 10656491 | 3.55E-01                | N/A          | 19    | rs384842   | 52070865 | 3.46E-01                | N/A       | -             | 1.71E-07 | 6.14E-01 | 1.34E-04 | 1844                            |  |
| 5     | rs1875972  | 1.68E+08 | 1.33E-01                | SLIT3        | 10    | rs2505300  | 27830113 | 3.98E-01                | RAB18     | -             | 1.71E-07 | 7.25E-01 | 1.15E-05 | 1845                            |  |
| 9     | rs4130590  | 1.29E+08 | 9.17E-01                | GARNL3       | 10    | rs11255243 | 7701244  | 2.59E-01                | ITIH5     | -             | 1.71E-07 | 9.56E-01 | 3.33E-05 | 1846                            |  |
| 9     | rs4130590  | 1.29E+08 | 9.17E-01                | GARNL3       | 10    | rs1970183  | 7701459  | 2.59E-01                | ITIH5     | -             | 1.71E-07 | 9.74E-01 | 3.20E-05 | 1847                            |  |
| 11    | rs10831769 | 12201044 | 6.12E-01                | MICAL2       | 18    | rs2726252  | 35434744 | 5.29E-03                | LOC647946 | -             | 1.71E-07 | 9.48E-01 | 4.91E-06 | 1848                            |  |
| 6     | rs6907357  | 96218093 | 7.07E-01                | N/A          | 22    | rs9617490  | 47445992 | 4.81E-03                | FAM19A5   | -             | 1.72E-07 | 6.38E-03 | 1.17E-08 | 1849                            |  |
| 5     | rs12523655 | 1.7E+08  | 5.99E-01                | KCNIP1       | 7     | rs6976331  | 1.28E+08 | 4.24E-01                | N/A       | -             | 1.72E-07 | 4.55E-01 | 8.90E-06 | 1850                            |  |
| 1     | rs1808086  | 1.18E+08 | 8.04E-01                | FAM46C       | 2     | rs1405819  | 57712498 | 4.28E-01                | N/A       | -             | 1.72E-07 | 5.66E-01 | 1.40E-04 | 1851                            |  |
| 7     | rs1002029  | 1.55E+08 | 7.90E-01                | CNPY1        | 18    | rs1791350  | 55596838 | 3.80E-01                | N/A       | -             | 1.72E-07 | 2.26E-01 | 8.87E-04 | 1852                            |  |
| 17    | rs7209936  | 78519504 | 6.65E-01                | B3GNTL1      | 18    | rs8088164  | 53979610 | 6.35E-02                | NEDD4L    | -             | 1.72E-07 | 6.49E-01 | 5.05E-06 | 1853                            |  |
| 7     | rs6974363  | 47599712 | 6.43E-01                | N/A          | 19    | rs11880383 | 17231190 | 4.56E-01                | USHBP1    | -             | 1.72E-07 | 8.03E-01 | 1.03E-04 | 1854                            |  |
| 3     | rs6419833  | 37595485 | 4.95E-01                | ITGA9        | 8     | rs7009980  | 4488686  | 4.40E-01                | CSMD1     | -             | 1.72E-07 | 8.32E-01 | 1.50E-04 | 1855                            |  |
| 15    | rs10152718 | 36270856 | 9.11E-01                | N/A          | 16    | rs3764276  | 29580704 | 3.61E-01                | QPRT      | -             | 1.72E-07 | 9.35E-01 | 7.65E-05 | 1856                            |  |
| 4     | rs4695718  | 44107694 | 8.51E-01                | KCTD8        | 12    | rs10858403 | 75142247 | 1.81E-03                | N/A       | -             | 1.72E-07 | 3.56E-01 | 3.53E-04 | 1857                            |  |
| 1     | rs10493673 | 80887077 | 7.44E-01                | N/A          | 7     | rs10276455 | 53275750 | 7.85E-03                | N/A       | -             | 1.72E-07 | 2.34E-01 | 5.72E-04 | 1858                            |  |
| 2     | rs896637   | 2.09E+08 | 5.59E-01                | N/A          | 7     | rs1989886  | 20549647 | 1.18E-01                | N/A       | -             | 1.72E-07 | 5.87E-01 | 2.85E-04 | 1859                            |  |
| 2     | rs2203163  | 2360793  | 2.53E-01                | N/A          | 9     | rs10817758 | 1.17E+08 | 9.89E-01                | 1-Dec     | -             | 1.72E-07 | 5.84E-01 | 3.39E-05 | 1860                            |  |
| 6     | rs4896668  | 1.44E+08 | 4.96E-01                | PHACTR2      | 14    | rs4982398  | 20599037 | 5.69E-01                | RNASE7    | -             | 1.73E-07 | 1.14E-01 | 4.17E-03 | 1861                            |  |
| 4     | rs4697648  | 10307363 | 6.42E-01                | CLNK         | 7     | rs1017045  | 1.05E+08 | 7.20E-01                | N/A       | -             | 1.7      |          |          |                                 |  |

| SNP A |            |          |                 |           | SNP B |            |          |                    |          | Interaction P |          |          | Ranking  | Cluster in top 100 interactions |  |
|-------|------------|----------|-----------------|-----------|-------|------------|----------|--------------------|----------|---------------|----------|----------|----------|---------------------------------|--|
| CHR   | SNP        | Location | gle locus P val | Gene      | CHR   | SNP        | Location | single locus P val | Gene     | MHC region    | Stage 1  | Stage 2  | Combined |                                 |  |
| 4     | rs11132007 | 1.82E+08 | 9.06E-01        | N/A       | 18    | rs1430916  | 38525965 | 9.25E-01           | N/A      | -             | 1.75E-07 | 4.30E-01 | 8.82E-06 | 1903                            |  |
| 10    | rs11101464 | 49643764 | 9.14E-01        | WDFY4     | 10    | rs522549   | 80305869 | 5.07E-01           | N/A      | -             | 1.75E-07 | 4.32E-01 | 2.11E-04 | 1904                            |  |
| 6     | rs796716   | 93746305 | 3.02E-01        | N/A       | 14    | rs1204982  | 71289922 | 4.06E-02           | SIPA1L1  | -             | 1.75E-07 | 8.38E-01 | 2.31E-04 | 1905                            |  |
| 6     | rs554089   | 93735234 | 3.02E-01        | N/A       | 14    | rs1204982  | 71289922 | 4.06E-02           | SIPA1L1  | -             | 1.75E-07 | 9.06E-01 | 1.87E-04 | 1906                            |  |
| 6     | rs9380215  | 31157634 | 4.29E-02        | N/A       | 6     | rs3094205  | 31199841 | 5.91E-01           | C6orf15  | MHC           | 1.76E-07 | 7.32E-02 | 4.57E-07 | 1907                            |  |
| 2     | rs11886670 | 31174338 | 9.34E-01        | GALNT14   | 11    | rs746490   | 86083732 | 8.55E-01           | N/A      | -             | 1.76E-07 | 1.23E-01 | 4.50E-07 | 1908                            |  |
| 1     | rs7552260  | 30624265 | 7.04E-01        | N/A       | 18    | rs13381162 | 55096022 | 9.11E-01           | RAX      | -             | 1.76E-07 | 2.02E-01 | 1.36E-03 | 1909                            |  |
| 4     | rs17725302 | 1.78E+08 | 6.09E-01        | N/A       | 5     | rs4513726  | 1.43E+08 | 8.03E-01           | N/A      | -             | 1.76E-07 | 1.44E-01 | 4.38E-07 | 1910                            |  |
| 4     | rs1519313  | 1.87E+08 | 3.01E-03        | N/A       | 11    | rs17143395 | 81687956 | 6.24E-02           | N/A      | -             | 1.76E-07 | 3.79E-01 | 9.33E-05 | 1911                            |  |
| 1     | rs1340592  | 67793691 | 4.96E-01        | N/A       | 12    | rs1168514  | 46985543 | 9.11E-01           | N/A      | -             | 1.76E-07 | 7.15E-01 | 1.01E-04 | 1912                            |  |
| 1     | rs6662607  | 67794090 | 4.96E-01        | N/A       | 12    | rs1168514  | 46985543 | 9.11E-01           | N/A      | -             | 1.76E-07 | 7.15E-01 | 1.01E-04 | 1913                            |  |
| 1     | rs6693292  | 67795756 | 4.96E-01        | N/A       | 12    | rs1168514  | 46985543 | 9.11E-01           | N/A      | -             | 1.76E-07 | 7.15E-01 | 1.01E-04 | 1914                            |  |
| 1     | rs4655733  | 67798226 | 4.96E-01        | N/A       | 12    | rs1168514  | 46985543 | 9.11E-01           | N/A      | -             | 1.76E-07 | 7.73E-01 | 8.36E-05 | 1915                            |  |
| 12    | rs10772019 | 32976571 | 9.65E-01        | N/A       | 12    | rs11615997 | 1.28E+08 | 3.34E-01           | TMEM132D | -             | 1.76E-07 | 2.01E-01 | 1.16E-03 | 1916                            |  |
| 1     | rs4129186  | 2.13E+08 | 6.85E-01        | PTPN14    | 13    | rs12584299 | 1.08E+08 | 7.00E-02           | N/A      | -             | 1.76E-07 | 6.06E-01 | 1.36E-05 | 1917                            |  |
| 5     | rs2731714  | 1.72E+08 | 5.77E-01        | SH3PXD2B  | 22    | rs9609684  | 31759708 | 2.52E-01           | SYN3     | -             | 1.76E-07 | 5.19E-01 | 2.64E-04 | 1918                            |  |
| 5     | rs4360024  | 77719962 | 5.37E-01        | SCAMP1    | 11    | rs826044   | 73445145 | 5.08E-01           | C2CD3    | -             | 1.76E-07 | 6.47E-01 | 1.61E-05 | 1919                            |  |
| 1     | rs6678713  | 1.89E+08 | 5.35E-01        | FAM5C     | 15    | rs685935   | 53558203 | 4.55E-01           | DYX1C1   | -             | 1.77E-07 | 6.04E-01 | 1.73E-05 | 1920                            |  |
| 13    | rs1924578  | 96267186 | 2.15E-01        | HS6ST3    | 22    | rs2027855  | 46216177 | 7.20E-01           | N/A      | -             | 1.77E-07 | 9.73E-01 | 1.81E-05 | 1921                            |  |
| 3     | rs2037184  | 1.89E+08 | 2.28E-01        | N/A       | 8     | rs3134133  | 1.08E+08 | 2.41E-01           | OXR1     | -             | 1.77E-07 | 4.60E-01 | 2.62E-04 | 1922                            |  |
| 3     | rs2037184  | 1.89E+08 | 2.28E-01        | N/A       | 8     | rs1350984  | 1.08E+08 | 2.41E-01           | OXR1     | -             | 1.77E-07 | 5.04E-01 | 2.11E-04 | 1923                            |  |
| 18    | rs948655   | 52924341 | 7.33E-01        | N/A       | 20    | rs2426214  | 49007217 | 9.38E-01           | MOCS3    | -             | 1.77E-07 | 6.84E-01 | 1.70E-04 | 1924                            |  |
| 3     | rs2037184  | 1.89E+08 | 2.28E-01        | N/A       | 8     | rs3101525  | 1.08E+08 | 2.41E-01           | OXR1     | -             | 1.77E-07 | N/A      | N/A      | 1925                            |  |
| 1     | rs10489639 | 1.59E+08 | 7.88E-01        | CD48      | 16    | rs10514566 | 81385638 | 7.82E-02           | CDH13    | -             | 1.77E-07 | 3.44E-01 | 2.74E-04 | 1926                            |  |
| 7     | rs971818   | 1.47E+08 | 1.79E-01        | CNTN/AP2  | 11    | rs10894710 | 1.33E+08 | 4.13E-01           | N/A      | -             | 1.77E-07 | 3.79E-01 | 4.27E-05 | 1927                            |  |
| 7     | rs17166711 | 13075823 | 7.09E-02        | N/A       | 19    | rs1859955  | 62514181 | 6.47E-01           | ZNF460   | -             | 1.77E-07 | 5.08E-01 | 3.04E-06 | 1928                            |  |
| 7     | rs12533128 | 13071663 | 7.09E-02        | N/A       | 19    | rs1859955  | 62514181 | 6.47E-01           | ZNF460   | -             | 1.77E-07 | 5.08E-01 | 4.62E-06 | 1929                            |  |
| 7     | rs7778887  | 13071534 | 7.09E-02        | N/A       | 19    | rs1859955  | 62514181 | 6.47E-01           | ZNF460   | -             | 1.77E-07 | 5.08E-01 | 4.62E-06 | 1930                            |  |
| 12    | rs904647   | 1.23E+08 | 2.43E-01        | FAM101A   | 17    | rs2529378  | 67326448 | 2.71E-02           | N/A      | -             | 1.77E-07 | 8.93E-02 | 1.88E-07 | 1931                            |  |
| 12    | rs7953959  | 96052271 | 8.83E-01        | N/A       | 19    | rs2334253  | 50803817 | 2.61E-01           | N/A      | -             | 1.77E-07 | 9.47E-01 | 4.15E-05 | 1932                            |  |
| 1     | rs2281960  | 1.65E+08 | 6.11E-01        | GPA33     | 12    | rs11114901 | 75581238 | 5.64E-01           | N/A      | -             | 1.77E-07 | 3.45E-01 | 1.14E-04 | 1933                            |  |
| 1     | rs2281962  | 1.65E+08 | 6.11E-01        | GPA33     | 12    | rs11114901 | 75581238 | 5.64E-01           | N/A      | -             | 1.77E-07 | 3.45E-01 | 1.14E-04 | 1934                            |  |
| 7     | rs7804782  | 12525324 | 4.08E-01        | N/A       | 19    | rs735386   | 13225932 | 3.41E-01           | CACNA1A  | -             | 1.77E-07 | 3.66E-01 | 6.32E-04 | 1935                            |  |
| 2     | rs2059412  | 1752354  | 7.59E-01        | MYT1L     | 8     | rs4562370  | 90704907 | 8.65E-01           | N/A      | -             | 1.78E-07 | 1.35E-01 | 1.48E-06 | 1936                            |  |
| 5     | rs6869061  | 25051322 | 5.04E-01        | N/A       | 9     | rs4977871  | 23633682 | 9.19E-01           | N/A      | -             | 1.78E-07 | 3.84E-01 | 1.12E-05 | 1937                            |  |
| 6     | rs2233965  | 31188878 | 4.20E-03        | C6orf15   | 6     | rs4122189  | 31275906 | 7.70E-02           | HCG27    | MHC           | 1.78E-07 | 4.89E-01 | 2.57E-05 | 1938                            |  |
| 5     | rs37249    | 76052731 | 5.41E-01        | IQGA2P    | 8     | rs932649   | 18833654 | 9.10E-01           | PSD3     | -             | 1.78E-07 | N/A      | N/A      | 1939                            |  |
| 6     | rs1158747  | 1.13E+08 | 4.15E-01        | LAMA4     | 2     | rs12995942 | 16226902 | 7.82E-01           | N/A      | -             | 1.78E-07 | 1.93E-01 | 1.67E-04 | 1940                            |  |
| 9     | rs4879930  | 35815413 | 1.47E-01        | TMEM8B    | 14    | rs2144039  | 22799242 | 2.41E-01           | HOMEZ    | -             | 1.78E-07 | 6.91E-01 | 2.85E-04 | 1941                            |  |
| 3     | rs6782326  | 19327455 | 8.22E-02        | KCNH8     | 19    | rs2302600  | 17802143 | 8.06E-01           | JAK3     | -             | 1.78E-07 | 6.46E-01 | 1.97E-04 | 1942                            |  |
| 5     | rs11949188 | 1.68E+08 | 3.45E-01        | WWC1      | 7     | rs1181728  | 1.41E+08 | 3.90E-02           | N/A      | -             | 1.78E-07 | 7.35E-01 | 2.65E-04 | 1943                            |  |
| 6     | rs2517552  | 31115569 | 8.54E-01        | HCG22     | 6     | rs7750269  | 31379136 | 8.58E-01           | N/A      | MHC           | 1.78E-07 | 3.96E-02 | 2.21E-07 | 1944                            |  |
| 17    | rs1631484  | 39346388 | 4.09E-01        | MPP2      | 18    | rs4891904  | 66962989 | 9.00E-01           | N/A      | -             | 1.78E-07 | 4.61E-02 | 8.53E-08 | 1945                            |  |
| 17    | rs3760360  | 39344518 | 4.09E-01        | MPP2      | 18    | rs4891904  | 66962989 | 9.00E-01           | N/A      | -             | 1.78E-07 | 4.61E-02 | 8.53E-08 | 1946                            |  |
| 3     | rs6779681  | 1.39E+08 | 8.78E-02        | N/A       | 15    | rs12902876 | 40131086 | 7.80E-01           | PLA2G4D  | -             | 1.79E-07 | 8.32E-01 | 8.43E-05 | 1947                            |  |
| 4     | rs17021918 | 95781900 | 5.69E-03        | PDLIM5    | 4     | rs10489022 | 1.38E+08 | 9.82E-01           | N/A      | -             | 1.79E-07 | 8.45E-01 | 1.67E-05 | 1948                            |  |
| 6     | rs1265110  | 31227401 | 8.90E-01        | TCF19     | 6     | rs9368675  | 31380136 | 7.91E-01           | N/A      | MHC           | 1.79E-07 | 9.59E-01 | 6.02E-05 | 1949                            |  |
| 4     | rs4690563  | 1.79E+08 | 5.72E-01        | LOC285501 | 19    | rs7249604  | 58709070 | 6.35E-01           | ZNF813   | -             | 1.79E-07 | 2.54E-01 | 2.54E-06 | 1950                            |  |
| 6     | rs1265256  | 4429854  | 2.13E-02        | N/A       | 16    | rs756813   | 23198310 | 4.85E-01           | N/A      | -             | 1.79E-07 | 3.78E-01 | 2.59E-04 | 1951                            |  |
| 3     | rs2046227  | 1.02E+08 | 6.40E-01        | GPR128    | 10    | rs2306409  | 1036712  | 7.95E-01           | GTPBP4   | -             | 1.79E-07 | 1.01E-01 | 1.56E-07 | 1952                            |  |
| 2     | rs6717788  | 6468684  | 7.04E-01        | N/A       | 4     | rs1027655  | 1.08E+08 | 8.60E-01           | N/A      | -             | 1.79E-07 | 2.35E-01 | 2.63E-06 | 1953                            |  |
| 1     | rs1808806  | 1.18E+08 | 8.04E-01        | FAM46C    | 2     | rs2245273  | 57618825 | 3.40E-01           | N/A      | -             | 1.79E-07 | 5.68E-01 | 1.06E-04 | 1954                            |  |
| 6     | rs6932549  | 75548849 | 4.83E-01        | N/A       | 11    | rs2919040  | 96085117 | 2.21E-01           | N/A      | -             | 1.79E-07 | 9.55E-01 | 8.11E-05 | 1955                            |  |
| 1     | rs4845733  | 1.5E+08  | 2.42E-01        | N/A       | 9     | rs10757753 | 28506764 | 2.45E-01           | LINGO2   | -             | 1.79E-07 | 4.66E-01 | 7.34E-06 | 1956                            |  |
| 3     | rs11713033 | 1.59E+08 | 7.34E-01        | N/A       | 5     | rs250210   | 50328781 | 4.18E-01           | N/A      | -             | 1.79E-07 | 8.41E-02 | 9.94E-08 | 1957                            |  |
| 9     | rs1444826  | 74536439 | 2.27E-02        | TMC1      | 17    | rs2323661  | 15241034 | 1.56E-01           | N/A      | -             | 1.79E-07 | 2.30E-01 | 2.03E-06 | 1958                            |  |
| 6     | rs1989634  | 1.11E+08 | 5.73E-01        | N/A       | 13    | rs2318058  | 1.12E+08 | 5.76E-01           | N/A      | -             | 1.79E-07 | 5.45E-01 | 4.96E-04 | 1959                            |  |
| 6     | rs3130534  | 31317024 | 3.50E-01        | N/A       | 6     | rs9368675  | 31380136 | 7.91E-01           | N/A      | MHC           | 1.79E-07 | 2.88E-01 | 7.49E-06 | 1960                            |  |
| 4     | rs6831971  | 6418368  | 2.47E-01        | PPP2R2C   | 8     | rs3134369  | 1.02E+08 | 5.86E-01           | N/A      | -             | 1.80E-07 | 6.04E-01 | 6.95E-06 | 1961                            |  |
| 12    | rs549433   | 61467083 | 8.12E-01        | PPM1H     | 12    | rs1117898  | 70606698 | 5.61E-03           | TPH2     | -             | 1.80E-07 | 3.77E-01 | 4.79E-04 | 1962                            |  |
| 12    | rs7969363  | 3173346  | 4.25E-02        | TSPAN9    | 21    | rs468725   | 27108137 | 9.34E-01           | N/A      | -             | 1.80E-07 | 1.03E-01 | 3.14E-03 | 1963                            |  |
| 8     | rs352806   | 15662778 | 7.12E-01        | TUSC3     | 22    | rs735455   | 20743793 | 9.48E-01           | N/A      | -             | 1.80E-07 | 3.74E-01 | 1.48E-06 | 1964                            |  |
| 14    | rs11158751 | 68101178 | 8.01E-01        | RAD51L1   | 20    | rs1555300  | 42863904 | 8.23E-01           | RIMS4    | -             | 1.80E-07 | 6.88E-01 | 2.30E-05 | 1965                            |  |
| 6     | rs6901012  | 1.39E+08 | 8.65E-01        | NHSL1     | 12    | rs7958878  | 99646096 | 2.32E-01           | N/A      | -             | 1.80E-07 | 7.99E-01 | 4.01E-05 | 1966                            |  |
| 2     | rs4675812  | 2.42E+08 | 7.38E-01        | FRAP2     | 15    | rs17659026 | 51120707 | 5.54E-02           | N/A      | -             | 1.80E-07 | 2.24E-03 | 1.46E-02 | 1967                            |  |
| 1     | rs10918609 | 1.65E+08 | 9.07E-01        | MAEL      | 4     | rs7657542  | 20374965 | 2.32E-01           | KCNIP4   | -             | 1.80E-07 | 8.85E-01 | 1.60E-04 | 1968                            |  |
| 6     | rs6929407  | 82540364 | 9.93E-01        | N/A       | 14    | rs9806105  | 79676933 | 3.82E-01           | N/A      | -             | 1.80E-07 | 6.16E-01 | 2.21E-04 | 1969                            |  |
| 6     | rs1265110  | 31227401 | 8.90E-01        | TCF19     | 6     | rs7750269  | 31379136 | 8.58E-01           | N/A      | MHC           | 1.81E-07 | 1.86E-01 | 4.48E-06 | 1970                            |  |
| 3     | rs6765225  | 59534529 | 6.78E-01        | N/A       | 10    | rs1247419  | 29948134 | 9.45E-01           | SVIL     | -             | 1.81E-07 | 4.97E-02 | 5.28E-03 | 1971                            |  |
| 13    | rs7318560  | 23579068 | 8.60E-01        | N/A       | 22    | rs714006   | 48233723 | 6.49E-01           | N/A      | -             | 1.81E-07 | 9.78E-01 | 9.48E-05 | 1972                            |  |
| 5     | rs4645374  | 1.09E+08 | 1.52E-01        | N/A       | 10    | rs12262014 | 11379015 | 1.26E-01           | CUGBP2   | -             | 1.81E-07 | 7.60E-01 | 2.72E-04 | 1973                            |  |
| 3     | rs11709882 | 1.61E+08 | 2.24E-01        | N/A       | 20    | rs722829   | 117701   | 5.20E-01           | DEFB128  | -             | 1.81E-07 | 2.54     |          |                                 |  |



| SNP A |            |          |                |          | SNP B |            |          |                     |           | Interaction P |          |          | Ranking  | Cluster in top 100 interactions |  |
|-------|------------|----------|----------------|----------|-------|------------|----------|---------------------|-----------|---------------|----------|----------|----------|---------------------------------|--|
| CHR   | SNP        | Location | gle locus P va | Gene     | CHR   | SNP        | Location | single locus P valu | Gene      | MHC region    | Stage 1  | Stage 2  | Combined |                                 |  |
| 8     | rs6991392  | 1893230  | 9.90E-01       | ARHGEF10 | 14    | rs1956174  | 93885874 | 9.65E-01            | N/A       | -             | 1.93E-07 | 4.11E-01 | 6.45E-06 | 2127                            |  |
| 2     | rs4599058  | 2.36E+08 | 4.76E-01       | N/A      | 4     | rs1250812  | 1.81E+08 | 7.86E-01            | N/A       | -             | 1.93E-07 | 8.70E-01 | 1.16E-05 | 2128                            |  |
| 5     | rs12519172 | 1.61E+08 | 6.94E-01       | N/A      | 21    | rs220170   | 42428369 | 1.12E-01            | UMODL1    | -             | 1.93E-07 | N/A      | N/A      | 2129                            |  |
| 6     | rs3130559  | 31205280 | 7.50E-01       | C6orf15  | 6     | rs9267649  | 31932807 | 1.17E-02            | C6orf48   | MHC           | 1.94E-07 | 5.45E-01 | 4.02E-06 | 2130                            |  |
| 6     | rs9348050  | 1.66E+08 | 6.98E-01       | N/A      | 5     | rs7718690  | 1.74E+08 | 6.85E-01            | N/A       | -             | 1.94E-07 | 8.99E-01 | 1.45E-04 | 2131                            |  |
| 1     | rs922114   | 4411281  | 9.54E-01       | N/A      | 7     | rs10262722 | 29506730 | 9.03E-01            | CHN2      | -             | 1.94E-07 | 5.94E-01 | 1.63E-04 | 2132                            |  |
| 1     | rs885098   | 68506066 | 2.59E-01       | N/A      | 5     | rs6892958  | 1.47E+08 | 1.16E-01            | JAKMIP2   | -             | 1.94E-07 | 6.05E-01 | 2.31E-05 | 2133                            |  |
| 1     | rs10489667 | 1.15E+08 | 9.12E-01       | N/A      | 3     | rs3805015  | 4797145  | 5.43E-01            | ITPR1     | -             | 1.94E-07 | 8.37E-01 | 9.49E-06 | 2134                            |  |
| 19    | rs919803   | 35678944 | 1.57E-01       | ZNF536   | 22    | rs6009503  | 47918047 | 1.89E-01            | N/A       | -             | 1.94E-07 | 9.62E-01 | 1.63E-04 | 2135                            |  |
| 3     | rs12487078 | 1.28E+08 | 4.87E-01       | N/A      | 5     | rs13188321 | 1.12E+08 | 7.84E-01            | N/A       | -             | 1.94E-07 | 1.05E-01 | 8.89E-07 | 2136                            |  |
| 8     | rs391916   | 88581402 | 6.22E-02       | N/A      | 9     | rs7031605  | 7074558  | 5.37E-01            | KDM4C     | -             | 1.94E-07 | 7.43E-01 | 1.20E-04 | 2137                            |  |
| 8     | rs463809   | 88582958 | 6.22E-02       | N/A      | 9     | rs7031605  | 7074558  | 5.37E-01            | KDM4C     | -             | 1.94E-07 | N/A      | N/A      | 2138                            |  |
| 13    | rs9318743  | 80677414 | 1.71E-01       | N/A      | 22    | rs12628683 | 24795266 | 3.91E-01            | N/A       | -             | 1.95E-07 | 3.46E-01 | 9.42E-06 | 2139                            |  |
| 1     | rs1361429  | 1.65E+08 | 8.00E-01       | N/A      | 2     | rs13387662 | 34016918 | 2.26E-01            | N/A       | -             | 1.95E-07 | 8.22E-01 | 1.17E-05 | 2140                            |  |
| 1     | rs16858460 | 1.65E+08 | 8.22E-01       | DFSP27   | 12    | rs2669013  | 75547079 | 6.30E-01            | N/A       | -             | 1.95E-07 | N/A      | N/A      | 2141                            |  |
| 3     | rs9828692  | 1.35E+08 | 5.16E-02       | BFSP2    | 4     | rs4627935  | 1.42E+08 | 1.59E-01            | RNF150    | -             | 1.95E-07 | 8.08E-01 | 2.16E-05 | 2142                            |  |
| 1     | rs2240335  | 17547124 | 1.17E-02       | PADI4    | 13    | rs486299   | 71844010 | 8.94E-01            | N/A       | -             | 1.95E-07 | 6.89E-01 | 1.13E-04 | 2143                            |  |
| 3     | rs17822079 | 77403430 | 2.55E-01       | ROBO2    | 16    | rs2347642  | 27017929 | 8.43E-01            | N/A       | -             | 1.95E-07 | 3.07E-01 | 5.75E-06 | 2144                            |  |
| 1     | rs6670349  | 2.13E+08 | 8.24E-01       | PTPN14   | 13    | rs11069721 | 1.08E+08 | 5.06E-02            | N/A       | -             | 1.95E-07 | 6.50E-01 | 1.75E-04 | 2145                            |  |
| 10    | rs1679414  | 4495344  | 2.71E-01       | N/A      | 16    | rs4782717  | 81167218 | 2.78E-01            | N/A       | -             | 1.95E-07 | 2.05E-01 | 2.95E-07 | 2146                            |  |
| 3     | rs9814549  | 1.01E+08 | 6.90E-01       | C3orf26  | 8     | rs7812526  | 16933751 | 6.37E-01            | EFHA2     | -             | 1.95E-07 | 7.84E-01 | 7.33E-06 | 2147                            |  |
| 3     | rs11131064 | 7189945  | 5.95E-01       | GRM7     | 20    | rs6020994  | 49178718 | 1.03E-01            | N/A       | -             | 1.95E-07 | 9.71E-01 | 7.65E-05 | 2148                            |  |
| 11    | rs538371   | 1.07E+08 | 4.50E-01       | CWF19L2  | 18    | rs1550716  | 35493076 | 1.30E-03            | LOC647946 | -             | 1.95E-07 | 1.11E-01 | 1.02E-06 | 2149                            |  |
| 15    | rs12909171 | 97796941 | 3.15E-01       | N/A      | 17    | rs9914954  | 28872301 | 1.11E-01            | ACCN1     | -             | 1.95E-07 | 2.69E-01 | 1.40E-06 | 2150                            |  |
| 5     | rs262749   | 1.65E+08 | 6.94E-01       | N/A      | 16    | rs274073   | 24795616 | 7.80E-01            | SLC5A11   | -             | 1.95E-07 | 5.12E-01 | 4.71E-04 | 2151                            |  |
| 7     | rs4723037  | 30966625 | 1.87E-01       | GHRHR    | 15    | rs12913541 | 65254561 | 3.52E-01            | SMAD3     | -             | 1.95E-07 | 8.96E-01 | 4.51E-05 | 2152                            |  |
| 8     | rs4873274  | 49401130 | 6.75E-01       | N/A      | 12    | rs975085   | 43457609 | 1.41E-01            | NELL2     | -             | 1.95E-07 | 9.96E-01 | 6.48E-05 | 2153                            |  |
| 5     | rs4921086  | 1.16E+08 | 3.80E-01       | COMMD10  | 18    | rs7240382  | 72579628 | 1.92E-01            | N/A       | -             | 1.95E-07 | 6.71E-01 | 1.96E-05 | 2154                            |  |
| 10    | rs10998957 | 71198936 | 5.17E-01       | N/A      | 22    | rs5770953  | 49409804 | 9.14E-01            | ARSA      | -             | 1.96E-07 | 3.10E-01 | 1.60E-06 | 2155                            |  |
| 6     | rs3798349  | 34879798 | 2.18E-01       | UHRF1BP1 | 11    | rs12420853 | 44681103 | 6.76E-01            | N/A       | MHC           | 1.96E-07 | N/A      | N/A      | 2156                            |  |
| 18    | rs2032165  | 8978701  | 6.78E-01       | N/A      | 20    | rs232291   | 43767808 | 8.10E-01            | WFDC10B   | -             | 1.96E-07 | 4.99E-01 | 8.99E-04 | 2157                            |  |
| 5     | rs2914723  | 9994401  | 4.07E-02       | N/A      | 14    | rs2208432  | 25201299 | 6.84E-03            | N/A       | -             | 1.96E-07 | 5.59E-01 | 6.30E-04 | 2158                            |  |
| 6     | rs1555035  | 9930468  | 7.62E-01       | N/A      | 19    | rs7255568  | 556985   | 1.86E-01            | POLRMT    | -             | 1.96E-07 | 4.83E-01 | 4.09E-06 | 2159                            |  |
| 3     | rs2049233  | 1.98E+08 | 6.09E-01       | PAK2     | 4     | rs4693491  | 83846807 | 9.47E-01            | SCD5      | -             | 1.96E-07 | 1.23E-01 | 3.39E-08 | 2160                            |  |
| 8     | rs4355773  | 26121818 | 1.03E-01       | N/A      | 10    | rs3781191  | 89452970 | 5.28E-01            | PAPSS2    | -             | 1.96E-07 | 7.27E-01 | 1.88E-05 | 2161                            |  |
| 2     | rs13407109 | 2.18E+08 | 9.06E-02       | TNS1     | 12    | rs1245810  | 78161526 | 9.82E-01            | SYT1      | -             | 1.96E-07 | 7.34E-01 | 1.83E-04 | 2162                            |  |
| 1     | rs6427807  | 1.98E+08 | 3.10E-01       | FAMA5B   | 8     | rs1095667  | 1.34E+08 | 9.94E-01            | HPYR1     | -             | 1.96E-07 | 5.02E-01 | 3.98E-05 | 2163                            |  |
| 5     | rs6873909  | 9340073  | 7.25E-01       | SEMA5A   | 19    | rs2301661  | 18898053 | 3.09E-01            | HOMER3    | -             | 1.96E-07 | 9.34E-01 | 1.61E-04 | 2164                            |  |
| 6     | rs1570055  | 1.37E+08 | 9.72E-01       | MAP3K5   | 8     | rs2979419  | 62167326 | 2.62E-01            | N/A       | -             | 1.96E-07 | 1.96E-01 | 1.30E-06 | 2165                            |  |
| 6     | rs9483945  | 1.37E+08 | 9.72E-01       | MAP3K5   | 8     | rs2979419  | 62167326 | 2.62E-01            | N/A       | -             | 1.96E-07 | 2.49E-01 | 1.79E-06 | 2166                            |  |
| 2     | rs4234085  | 2.09E+08 | 1.20E-01       | N/A      | 7     | rs10273711 | 20519346 | 1.20E-01            | N/A       | -             | 1.96E-07 | 4.75E-01 | 2.86E-04 | 2167                            |  |
| 3     | rs1881364  | 10946358 | 1.30E-01       | SLC6A11  | 5     | rs900531   | 10689151 | 1.97E-01            | ANKRD33B  | -             | 1.96E-07 | 6.74E-01 | 1.27E-04 | 2168                            |  |
| 9     | rs2808707  | 86748114 | 9.60E-01       | NTRK2    | 11    | rs503591   | 58435036 | 7.11E-01            | N/A       | -             | 1.96E-07 | 6.59E-01 | 7.56E-06 | 2169                            |  |
| 3     | rs17331632 | 1.27E+08 | 1.32E-01       | SNX4     | 15    | rs813299   | 29225595 | 8.06E-01            | N/A       | -             | 1.97E-07 | 1.62E-01 | 5.76E-07 | 2170                            |  |
| 2     | rs1067350  | 44523450 | 9.60E-01       | C2orf34  | 3     | rs10933671 | 1.96E+08 | 7.25E-01            | GP5       | -             | 1.97E-07 | 7.98E-01 | 4.58E-05 | 2171                            |  |
| 7     | rs17166689 | 13068758 | 6.44E-02       | N/A      | 19    | rs1859955  | 62514181 | 6.47E-01            | ZNF460    | -             | 1.97E-07 | N/A      | N/A      | 2172                            |  |
| 2     | rs6541877  | 1.24E+08 | 5.97E-01       | N/A      | 8     | rs878873   | 21890527 | 2.78E-01            | XPO7      | -             | 1.97E-07 | 7.67E-02 | 3.10E-03 | 2173                            |  |
| 5     | rs1030179  | 1.23E+08 | 6.89E-01       | N/A      | 10    | rs1914568  | 58171445 | 1.89E-01            | N/A       | -             | 1.97E-07 | 3.13E-01 | 2.99E-04 | 2174                            |  |
| 10    | rs619778   | 3634879  | 1.18E-01       | N/A      | 18    | rs9954817  | 11431243 | 1.86E-01            | N/A       | -             | 1.97E-07 | 4.59E-01 | 7.38E-04 | 2175                            |  |
| 2     | rs16847299 | 1.34E+08 | 9.78E-01       | NCKAP5   | 12    | rs917634   | 6501430  | 4.78E-01            | N/A       | -             | 1.97E-07 | 5.22E-01 | 1.08E-04 | 2176                            |  |
| 2     | rs16847409 | 1.34E+08 | 9.78E-01       | NCKAP5   | 12    | rs917634   | 6501430  | 4.78E-01            | N/A       | -             | 1.97E-07 | 6.00E-01 | 7.65E-05 | 2177                            |  |
| 1     | rs559798   | 2.43E+08 | 9.42E-01       | C1orf100 | 11    | rs7107014  | 43264387 | 8.69E-01            | N/A       | -             | 1.97E-07 | 7.77E-01 | 1.41E-04 | 2178                            |  |
| 3     | rs9827214  | 1.59E+08 | 8.27E-01       | N/A      | 5     | rs250210   | 50328781 | 4.18E-01            | N/A       | -             | 1.97E-07 | 8.09E-02 | 1.05E-07 | 2179                            |  |
| 12    | rs10859808 | 93888058 | 1.27E-02       | NDUFA12  | 20    | rs4810539  | 44757415 | 6.23E-01            | SLC2A10   | -             | 1.97E-07 | 1.05E-01 | 6.31E-07 | 2180                            |  |
| 7     | rs6948739  | 2899721  | 1.13E-02       | CARD11   | 12    | rs7309495  | 1.12E+08 | 2.29E-01            | RPH3A     | -             | 1.97E-07 | 3.69E-01 | 2.63E-04 | 2181                            |  |
| 7     | rs1544521  | 1.24E+08 | 7.96E-01       | N/A      | 13    | rs4769507  | 26092813 | 9.42E-01            | WASF3     | -             | 1.97E-07 | 9.13E-01 | 4.86E-05 | 2182                            |  |
| 4     | rs1513697  | 1.23E+08 | 6.86E-01       | N/A      | 5     | rs474807   | 1.11E+08 | 3.71E-01            | C5orf13   | -             | 1.98E-07 | 2.42E-02 | 1.40E-07 | 2183                            |  |
| 6     | rs674026   | 1.51E+08 | 7.55E-02       | IYD      | 10    | rs10787025 | 1.09E+08 | 5.62E-01            | N/A       | -             | 1.98E-07 | 1.72E-01 | 6.28E-07 | 2184                            |  |
| 7     | rs270904   | 1.37E+08 | 7.97E-01       | DGKI     | 7     | rs12534758 | 1.41E+08 | 3.69E-01            | AGK       | -             | 1.98E-07 | 7.19E-01 | 2.80E-05 | 2185                            |  |
| 5     | rs1514858  | 17776087 | 3.99E-01       | N/A      | 11    | rs10160595 | 21369124 | 4.12E-01            | NELL1     | -             | 1.98E-07 | N/A      | N/A      | 2186                            |  |
| 11    | rs7930159  | 69133252 | 5.40E-01       | N/A      | 22    | rs2413485  | 36523866 | 3.78E-02            | H1FO      | -             | 1.98E-07 | 7.66E-01 | 1.10E-04 | 2187                            |  |
| 3     | rs696067   | 1.91E+08 | 6.85E-01       | LEPREL1  | 11    | rs1057128  | 2753813  | 7.31E-01            | KCNQ1     | -             | 1.98E-07 | N/A      | N/A      | 2188                            |  |
| 11    | rs12577015 | 10381085 | 4.10E-01       | N/A      | 17    | rs917538   | 14975566 | 6.48E-01            | N/A       | -             | 1.98E-07 | 3.45E-01 | 6.55E-04 | 2189                            |  |
| 2     | rs698811   | 44557180 | 8.42E-01       | C2orf34  | 3     | rs13082706 | 1.96E+08 | 7.66E-01            | ATP13A3   | -             | 1.99E-07 | 8.02E-01 | 6.21E-05 | 2190                            |  |
| 3     | rs4858021  | 21827143 | 8.93E-03       | N/A      | 3     | rs1497762  | 1.61E+08 | 9.59E-01            | SCHIP1    | -             | 1.99E-07 | 2.54E-01 | 1.80E-06 | 2191                            |  |
| 3     | rs6776685  | 35708268 | 5.08E-01       | ARP2-21  | 9     | rs3802347  | 1.33E+08 | 8.87E-01            | ABL1      | -             | 1.99E-07 | 3.16E-01 | 1.60E-03 | 2192                            |  |
| 1     | rs12748225 | 33528130 | 8.72E-01       | ZNF362   | 11    | rs1446201  | 25010231 | 6.48E-01            | LUZP2     | -             | 1.99E-07 | 4.75E-01 | 3.70E-03 | 2193                            |  |
| 1     | rs2293464  | 2.25E+08 | 5.22E-01       | PARP1    | 16    | rs2908668  | 5013774  | 7.33E-01            | SEC14L5   | -             | 1.99E-07 | 3.90E-01 | 1.89E-03 | 2194                            |  |
| 2     | rs6547035  | 75945152 | 1.08E-01       | N/A      | 11    | rs7948432  | 1.01E+08 | 4.46E-01            | N/A       | -             | 1.99E-07 | 7.50E-01 | 4.64E-05 | 2195                            |  |
| 1     | rs6413913  | 1.88E+08 | 6.92E-01       | N/A      | 12    | rs796041   | 88164489 | 9.89E-01            | N/A       | -             | 1.99E-07 | 4.20E-01 | 4.43E-06 | 2196                            |  |
| 4     | rs17034632 | 1.06E+08 | 3.31E-01       | N/A      | 11    | rs446134   | 36364621 | 8.61E-02            | PRR5L     | -             | 1.99E-07 | 4.49E-01 | 8.97E-05 | 2197                            |  |
| 13    | rs9534651  | 46919997 | 2.74E-01       | N/A      | 19    | rs7252293  | 11225495 | 1.50E-01            | DOCK6     | -             | 1.99E-07 | 2.33E-01 | 1.93E-06 | 2198                            |  |
| 5     | rs10866630 | 1.68     |                |          |       |            |          |                     |           |               |          |          |          |                                 |  |



| SNP A |            |          |                |         | SNP B |            |          |                     |          | Interaction P |          |          | Ranking  | Cluster in top 100 interactions |    |
|-------|------------|----------|----------------|---------|-------|------------|----------|---------------------|----------|---------------|----------|----------|----------|---------------------------------|----|
| CHR   | SNP        | Location | gle locus P va | Gene    | CHR   | SNP        | Location | single locus P valu | Gene     | MHC region    | Stage 1  | Stage 2  | Combined |                                 |    |
| 3     | rs716534   | 1.11E+08 | 2.91E-01       | N/A     | 16    | rs2731766  | 56828823 | 4.67E-01            | CCDC113  | -             | 2.11E-07 | 6.95E-01 | 1.38E-04 | 2351                            |    |
| 7     | rs10255671 | 1.51E+08 | 4.48E-01       | CRYGN   | 20    | rs4810019  | 54344324 | 7.54E-01            | N/A      | -             | 2.11E-07 | N/A      | N/A      | 2352                            |    |
| 12    | rs10506937 | 85825624 | 7.99E-01       | N/A     | 16    | rs7342694  | 80461301 | 1.98E-01            | PLCG2    | -             | 2.11E-07 | 4.55E-01 | 3.30E-04 | 2353                            |    |
| 6     | rs9347882  | 1.65E+08 | 4.33E-01       | N/A     | 1     | rs12402711 | 41651668 | 5.18E-01            | N/A      | -             | 2.11E-07 | 6.03E-01 | 3.41E-06 | 2354                            |    |
| 5     | rs1501761  | 4811455  | 6.99E-01       | N/A     | 15    | rs7178749  | 59841189 | 1.69E-01            | N/A      | -             | 2.11E-07 | 8.54E-01 | 8.74E-05 | 2355                            |    |
| 2     | rs13002864 | 76580554 | 8.73E-02       | N/A     | 3     | rs1482038  | 14296181 | 5.73E-01            | N/A      | -             | 2.11E-07 | N/A      | N/A      | 2356                            |    |
| 3     | rs814753   | 65758136 | 2.75E-01       | MAGI1   | 4     | rs4695894  | 1.75E+08 | 5.74E-01            | N/A      | -             | 2.11E-07 | 4.38E-01 | 1.68E-03 | 2357                            |    |
| 6     | rs283548   | 51074433 | 1.77E-01       | N/A     | 3     | rs3755702  | 1.26E+08 | 6.67E-02            | KALRN    | -             | 2.11E-07 | 8.89E-01 | 4.34E-05 | 2358                            |    |
| 12    | rs10506938 | 85833028 | 7.43E-01       | N/A     | 16    | rs7342694  | 80461301 | 1.98E-01            | PLCG2    | -             | 2.11E-07 | 5.26E-01 | 2.32E-04 | 2359                            |    |
| 12    | rs2897395  | 85829951 | 7.43E-01       | N/A     | 16    | rs7342694  | 80461301 | 1.98E-01            | PLCG2    | -             | 2.11E-07 | 6.07E-01 | 1.78E-04 | 2360                            |    |
| 18    | rs7238355  | 32291755 | 3.85E-01       | FHOD3   | 19    | rs7246914  | 57362717 | 1.36E-01            | ZNF836   | -             | 2.11E-07 | 9.89E-01 | 1.04E-04 | 2361                            |    |
| 3     | rs6798734  | 1.6E+08  | 7.04E-01       | N/A     | 4     | rs7690462  | 24033252 | 3.90E-01            | N/A      | -             | 2.11E-07 | 3.88E-01 | 1.61E-03 | 2362                            |    |
| 11    | rs690847   | 1.29E+08 | 2.35E-01       | N/A     | 18    | rs280985   | 4441032  | 8.03E-01            | N/A      | -             | 2.11E-07 | 4.69E-01 | 8.98E-04 | 2363                            |    |
| 5     | rs16877062 | 79034659 | 4.92E-01       | CMYA5   | 9     | rs10867875 | 71481798 | 9.44E-01            | APBA1    | -             | 2.11E-07 | 9.91E-01 | 6.04E-05 | 2364                            |    |
| 13    | rs1415242  | 33614568 | 8.36E-01       | N/A     | 18    | rs949292   | 56319787 | 7.64E-01            | N/A      | -             | 2.11E-07 | 7.44E-01 | 1.30E-04 | 2365                            |    |
| 3     | rs7622003  | 1.33E+08 | 1.52E-01       | N/A     | 4     | rs1598859  | 1.04E+08 | 8.57E-01            | NFKB1    | -             | 2.11E-07 | 7.83E-01 | 2.15E-05 | 2366                            |    |
| 3     | rs7622210  | 1.33E+08 | 1.52E-01       | N/A     | 4     | rs1598859  | 1.04E+08 | 8.57E-01            | NFKB1    | -             | 2.11E-07 | 7.83E-01 | 2.15E-05 | 2367                            |    |
| 12    | rs12426177 | 1.06E+08 | 2.40E-02       | N/A     | 17    | rs3744345  | 12831997 | 8.17E-01            | RICH2    | -             | 2.11E-07 | 4.13E-02 | 1.13E-07 | 2368                            |    |
| 3     | rs10510896 | 63330132 | 9.81E-01       | SYNPR   | 15    | rs4779536  | 29574400 | 4.24E-01            | OTUD7A   | -             | 2.12E-07 | 7.28E-02 | 1.01E-07 | 2369                            |    |
| 6     | rs4122189  | 31275906 | 7.70E-02       | HCG27   | 6     | rs396243   | 31383153 | 2.17E-01            | N/A      | MHC           | 2.12E-07 | 5.46E-01 | 1.21E-04 | 2370                            |    |
| 1     | rs11203366 | 17530121 | 9.93E-03       | PADI4   | 13    | rs4885001  | 71857395 | 7.48E-01            | N/A      | -             | 2.12E-07 | 6.67E-01 | 1.65E-05 | 2371                            |    |
| 3     | rs1024940  | 1.92E+08 | 8.48E-01       | IL1RAP  | 8     | rs4871724  | 1.28E+08 | 8.85E-03            | N/A      | -             | 2.12E-07 | 8.58E-01 | 1.20E-04 | 2372                            |    |
| 5     | rs10520846 | 16954752 | 1.98E-01       | MYO10   | 19    | rs379327   | 61061978 | 6.42E-01            | NLRP4    | -             | 2.12E-07 | N/A      | N/A      | 2373                            |    |
| 7     | rs10215210 | 88206842 | 9.61E-01       | ZNF804B | 13    | rs609045   | 29644051 | 5.64E-01            | N/A      | -             | 2.12E-07 | 8.22E-01 | 1.21E-05 | 2374                            |    |
| 4     | rs13110363 | 1.63E+08 | 2.81E-01       | FSTL5   | 13    | rs2274085  | 1.01E+08 | 1.30E-01            | N/ALCN   | -             | 2.12E-07 | 6.94E-01 | 4.98E-05 | 2375                            |    |
| 4     | rs6821696  | 1.17E+08 | 2.49E-01       | MIR1973 | 10    | rs1380439  | 1.28E+08 | 6.89E-01            | ADAM12   | -             | 2.12E-07 | 8.37E-04 | 8.90E-10 | 2376                            |    |
| 3     | rs12635848 | 59371840 | 7.61E-01       | N/A     | 4     | rs10033031 | 1.15E+08 | 3.38E-02            | CAMK2D   | -             | 2.12E-07 | 4.18E-01 | 1.44E-05 | 2377                            |    |
| 3     | rs1398776  | 1.47E+08 | 8.31E-01       | N/A     | 9     | rs4742429  | 806742   | 2.20E-01            | N/A      | -             | 2.12E-07 | 2.72E-01 | 1.31E-03 | 2378                            |    |
| 6     | rs3130534  | 31317024 | 3.50E-01       | N/A     | 18    | rs2732229  | 71742290 | 5.44E-01            | N/A      | MHC           | 2.12E-07 | 9.18E-01 | 3.71E-05 | 2379                            |    |
| 1     | rs12760232 | 1.85E+08 | 8.07E-01       | PLA2G4A | 15    | rs522933   | 38046796 | 1.29E-01            | EIF2AK4  | -             | 2.13E-07 | N/A      | N/A      | 2380                            |    |
| 4     | rs4566706  | 1.89E+08 | 7.37E-01       | N/A     | 5     | rs38067    | 10037208 | 2.02E-01            | N/A      | -             | 2.13E-07 | 6.27E-01 | 2.31E-04 | 2381                            |    |
| 8     | rs1047398  | 22626963 | 9.53E-01       | PEBP4   | 11    | rs513438   | 82645611 | 9.07E-01            | ANKRD42  | -             | 2.13E-07 | 1.06E-01 | 8.05E-04 | 2382                            |    |
| 8     | rs1047406  | 22626880 | 9.53E-01       | PEBP4   | 11    | rs513438   | 82645611 | 9.07E-01            | ANKRD42  | -             | 2.13E-07 | 1.06E-01 | 8.05E-04 | 2383                            |    |
| 10    | rs617738   | 84312795 | 8.13E-01       | NRG3    | 10    | rs7097525  | 1.23E+08 | 1.64E-02            | N/A      | -             | 2.13E-07 | 1.55E-01 | 1.87E-06 | 2384                            |    |
| 7     | rs10280848 | 67742124 | 8.09E-01       | N/A     | 10    | rs3737275  | 26350416 | 3.53E-01            | MYO3A    | -             | 2.13E-07 | 2.35E-01 | 5.99E-04 | 2385                            |    |
| 2     | rs10497291 | 1.67E+08 | 6.91E-01       | N/A     | 22    | rs1746296  | 28463579 | 9.64E-01            | ZMAT5    | -             | 2.13E-07 | 7.06E-01 | 2.50E-05 | 2386                            |    |
| 2     | rs2600660  | 61403104 | 3.92E-01       | USP34   | 15    | rs971804   | 83345385 | 4.00E-01            | PDE8A    | -             | 2.13E-07 | 1.57E-01 | 1.79E-03 | 2387                            |    |
| 12    | rs17604051 | 40543278 | 8.84E-01       | N/A     | 22    | rs5750511  | 20785321 | 7.79E-01            | N/A      | -             | 2.13E-07 | 8.45E-01 | 9.84E-05 | 2388                            |    |
| 4     | rs1509620  | 95782995 | 5.64E-02       | PDLIM5  | 4     | rs10489022 | 1.38E+08 | 9.82E-01            | N/A      | -             | 2.13E-07 | 9.40E-01 | 6.39E-05 | 2389                            |    |
| 7     | rs17144110 | 21246477 | 4.04E-01       | N/A     | 8     | rs755683   | 18604967 | 8.77E-01            | PSD3     | -             | 2.13E-07 | 4.54E-01 | 7.48E-04 | 2390                            |    |
| 4     | rs4690142  | 81286316 | 6.24E-02       | N/A     | 20    | rs6090443  | 61624230 | 7.46E-01            | PPDPF    | -             | 2.13E-07 | 4.98E-01 | 1.90E-04 | 2391                            |    |
| 15    | rs1424712  | 92931134 | 1.27E-02       | N/A     | 16    | rs7342694  | 80461301 | 1.98E-01            | PLCG2    | -             | 2.13E-07 | 5.65E-01 | 5.61E-04 | 2392                            |    |
| 2     | rs17016629 | 35506420 | 1.82E-01       | N/A     | 7     | rs1544733  | 1.38E+08 | 5.55E-01            | TRIM24   | -             | 2.13E-07 | 8.06E-01 | 1.49E-04 | 2393                            |    |
| 3     | rs11128068 | 89289912 | 8.95E-02       | EPHA3   | 7     | rs10259462 | 1.3E+08  | 5.50E-01            | FLJ43663 | -             | 2.13E-07 | 6.30E-01 | 2.31E-05 | 2394                            |    |
| 7     | rs228587   | 1.44E+08 | 7.02E-03       | TPK1    | 21    | rs2838906  | 45646335 | 6.11E-01            | COL18A1  | -             | 2.13E-07 | 5.40E-01 | 6.32E-06 | 2395                            |    |
| 3     | rs1447738  | 1.45E+08 | 7.27E-01       | SLC9A9  | 8     | rs2816489  | 5849941  | 8.18E-01            | N/A      | -             | 2.13E-07 | 6.36E-01 | 1.16E-03 | 2396                            |    |
| 5     | rs4348193  | 77671476 | 5.91E-01       | N/A     | 11    | rs3741132  | 73655891 | 3.98E-01            | PPME1    | -             | 2.14E-07 | 9.07E-01 | 4.25E-05 | 2397                            |    |
| 7     | rs10215210 | 88206842 | 9.61E-01       | ZNF804B | 13    | rs7997640  | 29642080 | 5.24E-01            | N/A      | -             | 2.14E-07 | N/A      | N/A      | 2398                            |    |
| 3     | rs2350279  | 1.41E+08 | 3.47E-02       | CLSTN2  | 4     | rs10517048 | 42443021 | 3.91E-01            | N/A      | -             | 2.14E-07 | 1.39E-01 | 9.46E-07 | 2399                            |    |
| 3     | rs2350279  | 1.41E+08 | 3.47E-02       | CLSTN2  | 4     | rs2345904  | 42447945 | 3.91E-01            | N/A      | -             | 2.14E-07 | 1.39E-01 | 9.46E-07 | 2400                            |    |
| 3     | rs2350279  | 1.41E+08 | 3.47E-02       | CLSTN2  | 4     | rs6831756  | 42446582 | 3.91E-01            | N/A      | -             | 2.14E-07 | 1.39E-01 | 9.46E-07 | 2401                            |    |
| 3     | rs2350279  | 1.41E+08 | 3.47E-02       | CLSTN2  | 4     | rs6850284  | 42441381 | 3.91E-01            | N/A      | -             | 2.14E-07 | 1.39E-01 | 9.46E-07 | 2402                            |    |
| 3     | rs2350279  | 1.41E+08 | 3.47E-02       | CLSTN2  | 4     | rs7667384  | 42445273 | 3.91E-01            | N/A      | -             | 2.14E-07 | 1.39E-01 | 9.46E-07 | 2403                            |    |
| 3     | rs2350279  | 1.41E+08 | 3.47E-02       | CLSTN2  | 4     | rs9291222  | 42445972 | 3.91E-01            | N/A      | -             | 2.14E-07 | 1.39E-01 | 9.46E-07 | 2404                            |    |
| 12    | rs10850903 | 1.17E+08 | 6.29E-01       | KSR2    | 17    | rs3744516  | 29390113 | 4.10E-01            | ACCN1    | -             | 2.14E-07 | 9.32E-01 | 1.33E-05 | 2405                            |    |
| 1     | rs3901950  | 1.85E+08 | 4.52E-01       | N/A     | 5     | rs7715102  | 2427305  | 5.42E-01            | N/A      | -             | 2.14E-07 | 7.24E-01 | 3.53E-05 | 2406                            |    |
| 12    | rs10128762 | 72968165 | 7.81E-01       | N/A     | 21    | rs2824444  | 17985065 | 2.72E-01            | N/A      | -             | 2.14E-07 | 1.56E-03 | 3.39E-08 | 2407                            |    |
| 1     | rs12044451 | 75464916 | 4.91E-01       | SLC44A5 | 5     | rs828718   | 1.62E+08 | 5.73E-01            | N/A      | -             | 2.14E-07 | 5.38E-01 | 1.79E-05 | 2408                            |    |
| 2     | rs6545648  | 57511448 | 3.54E-01       | N/A     | 2     | rs730402   | 59948210 | 2.73E-02            | N/A      | -             | 2.14E-07 | 3.61E-03 | 2.72E-09 | 2409                            |    |
| 8     | rs2008566  | 70967766 | 7.12E-01       | N/A     | 11    | rs552007   | 1.14E+08 | 4.00E-01            | ZBTB16   | -             | 2.14E-07 | 6.19E-01 | 7.42E-06 | 2410                            |    |
| 3     | rs165571   | 13025094 | 6.28E-01       | IQSEC1  | 14    | rs2236184  | 68140901 | 8.23E-01            | RAD51L1  | -             | 2.14E-07 | 9.12E-01 | 2.08E-05 | 2411                            |    |
| 4     | rs4306906  | 1.77E+08 | 4.50E-01       | GPM6A   | 11    | rs2949861  | 93451687 | 4.79E-02            | HEPHL1   | -             | 2.15E-07 | 4.32E-01 | 9.46E-05 | 2412                            |    |
| 1     | rs11203366 | 17530121 | 9.93E-03       | PADI4   | 13    | rs486299   | 71844010 | 8.94E-01            | N/A      | -             | 2.15E-07 | 7.07E-01 | 1.10E-04 | 2413                            |    |
| 3     | rs2102801  | 29176464 | 5.09E-01       | N/A     | 17    | rs11656277 | 50726046 | 8.22E-02            | HLF      | -             | 2.15E-07 | 8.36E-01 | 2.92E-05 | 2414                            |    |
| 13    | rs879681   | 1.08E+08 | 2.38E-01       | N/A     | 19    | rs1946612  | 46459827 | 8.46E-01            | HNRPUL1  | -             | 2.15E-07 | 3.98E-02 | 8.44E-03 | 2415                            |    |
| 6     | rs9367511  | 53118141 | 1.47E-01       | GCM1    | 3     | rs9841414  | 1.65E+08 | 7.88E-01            | N/A      | -             | 2.15E-07 | 9.30E-01 | 1.99E-04 | 2416                            |    |
| 3     | rs7615473  | 55825018 | 2.41E-01       | ERC2    | 19    | rs1860565  | 62026834 | 7.53E-01            | PEG3     | -             | 2.15E-07 | 3.86E-01 | 3.73E-05 | 2417                            |    |
| 1     | rs12564019 | 1.58E+08 | 9.29E-01       | OR10J1  | 3     | rs11127905 | 85793026 | 2.44E-01            | CADM2    | -             | 2.15E-07 | 1.90E-01 | 2.77E-06 | 2418                            |    |
| 1     | rs12564019 | 1.58E+08 | 9.29E-01       | OR10J1  | 3     | rs9860249  | 85770242 | 2.44E-01            | CADM2    | -             | 2.15E-07 | 1.90E-01 | 2.77E-06 | 2419                            |    |
| 1     | rs1832787  | 18499504 | 2.02E-01       | IGSF21  | 3     | rs1344314  | 29708376 | 6.95E-01            | N/A      | -             | 2.15E-07 | 7.14E-01 | 2.70E-05 | 2420                            |    |
| 6     | rs693612   | 1.07E+08 | 8.96E-01       | PRDM1   | 9     | rs296663   | 92749882 | 6.95E-01            | N/A      | -             | 2.15E-07 | 8.05E-01 | 2.38E-05 | 2421                            |    |
| 16    | rs1072123  | 50596711 | 4.09E-01       | N/A     | 22    | rs5755464  | 33686322 | 5.89E-01            | N/A      | -             | 2.15E-07 | 9.17E-01 | 9.60E-05 | 2422                            | </ |













| SNP A |            |          |                 |           | SNP B |            |          |                    |          | Interaction P |          |          | Ranking  | Cluster in top 100 interactions |  |
|-------|------------|----------|-----------------|-----------|-------|------------|----------|--------------------|----------|---------------|----------|----------|----------|---------------------------------|--|
| CHR   | SNP        | Location | gle locus P val | Gene      | CHR   | SNP        | Location | single locus P val | Gene     | MHC region    | Stage 1  | Stage 2  | Combined |                                 |  |
| 6     | rs2328537  | 1.44E+08 | 7.35E-01        | PLAGL1    | 8     | rs10107666 | 33643721 | 2.78E-02           | N/A      | -             | 2.68E-07 | 4.19E-02 | 1.06E-07 | 3135                            |  |
| 6     | rs7763726  | 1.6E+08  | 9.04E-02        | FNDC1     | 2     | rs11894796 | 1.23E+08 | 9.77E-01           | N/A      | -             | 2.68E-07 | 4.83E-01 | 3.19E-05 | 3136                            |  |
| 6     | rs9472138  | 43919740 | 3.62E-01        | N/A       | 13    | rs527337   | 32459520 | 8.32E-01           | N/A      | -             | 2.68E-07 | 5.96E-01 | 2.91E-05 | 3137                            |  |
| 12    | rs6539316  | 1.06E+08 | 2.41E-02        | N/A       | 17    | rs3744345  | 12831997 | 8.17E-01           | RICH2    | -             | 2.68E-07 | 3.08E-02 | 1.73E-08 | 3138                            |  |
| 7     | rs2394936  | 98251592 | 6.88E-01        | N/A       | 17    | rs6504468  | 62318279 | 6.45E-01           | CACNG5   | -             | 2.68E-07 | 7.62E-01 | 1.96E-05 | 3139                            |  |
| 6     | rs1684802  | 1.54E+08 | 7.41E-01        | N/A       | 4     | rs1093782  | 7480682  | 8.93E-01           | SORCS2   | -             | 2.68E-07 | 3.45E-01 | 2.59E-03 | 3140                            |  |
| 11    | rs1790474  | 1.19E+08 | 4.13E-01        | N/A       | 15    | rs7497104  | 69941054 | 6.21E-01           | MYO9A    | -             | 2.68E-07 | 9.83E-01 | 9.23E-05 | 3141                            |  |
| 3     | rs6768946  | 28968511 | 1.89E-01        | N/A       | 15    | rs4842935  | 81431271 | 5.68E-01           | HOMER2   | -             | 2.68E-07 | 2.54E-01 | 1.16E-03 | 3142                            |  |
| 7     | rs736198   | 13069584 | 5.91E-02        | N/A       | 19    | rs1041173  | 62482800 | 4.72E-01           | ZNF460   | -             | 2.68E-07 | 6.30E-01 | 6.82E-06 | 3143                            |  |
| 6     | rs4299797  | 87002427 | 8.52E-01        | N/A       | 14    | rs2023955  | 70340808 | 1.57E-02           | MAP3K9   | -             | 2.68E-07 | 6.61E-01 | 4.60E-04 | 3144                            |  |
| 6     | rs9344586  | 87005974 | 8.52E-01        | N/A       | 14    | rs2023955  | 70340808 | 1.57E-02           | MAP3K9   | -             | 2.68E-07 | 6.61E-01 | 4.60E-04 | 3145                            |  |
| 6     | rs13217719 | 1.24E+08 | 1.39E-01        | NKAIN2    | 7     | rs7777398  | 1.55E+08 | 6.14E-02           | N/A      | -             | 2.69E-07 | 1.52E-01 | 1.25E-06 | 3146                            |  |
| 5     | rs1826675  | 62102994 | 2.07E-02        | N/A       | 9     | rs1075857  | 4197963  | 6.55E-01           | GLIS3    | -             | 2.69E-07 | 3.72E-01 | 2.98E-06 | 3147                            |  |
| 3     | rs6801602  | 1.9E+08  | 8.85E-01        | LPP       | 14    | rs2332909  | 72233067 | 4.87E-01           | DPF3     | -             | 2.69E-07 | 4.70E-01 | 1.58E-03 | 3148                            |  |
| 2     | rs10201495 | 2.36E+08 | 1.09E-01        | N/A       | 22    | rs1894605  | 34855927 | 1.50E-01           | APOL3    | -             | 2.69E-07 | 5.60E-02 | 4.79E-03 | 3149                            |  |
| 10    | rs11015882 | 27901946 | 4.28E-01        | N/A       | 13    | rs1759184  | 39642051 | 7.51E-01           | N/A      | -             | 2.69E-07 | 8.67E-01 | 6.15E-05 | 3150                            |  |
| 5     | rs6860945  | 16600195 | 7.78E-01        | FAM134B   | 9     | rs940120   | 14896868 | 8.68E-01           | FREM1    | -             | 2.69E-07 | 9.25E-01 | 9.95E-05 | 3151                            |  |
| 6     | rs7453313  | 9069974  | 4.28E-01        | N/A       | 20    | rs719563   | 7090997  | 2.75E-01           | N/A      | -             | 2.69E-07 | 4.48E-01 | 1.76E-05 | 3152                            |  |
| 4     | rs1294552  | 90063039 | 2.68E-02        | TTC7B     | 20    | rs2143861  | 11127758 | 3.38E-01           | N/A      | -             | 2.69E-07 | 5.99E-01 | 1.11E-04 | 3153                            |  |
| 4     | rs6448112  | 21678477 | 1.19E-01        | N/A       | 7     | rs12673206 | 25212304 | 2.25E-02           | NPVF     | -             | 2.69E-07 | 8.50E-01 | 1.43E-04 | 3154                            |  |
| 12    | rs9667991  | 93703993 | 2.43E-01        | N/A       | 13    | rs4771358  | 99694039 | 9.79E-01           | PCCA     | -             | 2.69E-07 | 4.01E-01 | 4.08E-06 | 3155                            |  |
| 12    | rs9667991  | 93703993 | 2.43E-01        | N/A       | 13    | rs6491555  | 99701543 | 9.79E-01           | PCCA     | -             | 2.69E-07 | 4.92E-01 | 5.45E-06 | 3156                            |  |
| 1     | rs7551015  | 18146429 | 8.73E-01        | N/A       | 4     | rs6533629  | 1.14E+08 | 6.65E-01           | C4orf21  | -             | 2.69E-07 | 6.78E-01 | 2.60E-04 | 3157                            |  |
| 3     | rs13325052 | 1.49E+08 | 1.88E-01        | N/A       | 13    | rs9550222  | 1.12E+08 | 3.46E-01           | N/A      | -             | 2.69E-07 | 2.37E-01 | 2.36E-03 | 3158                            |  |
| 2     | rs4663968  | 2.34E+08 | 5.73E-01        | UGT1A10   | 14    | rs10137862 | 50518114 | 5.13E-01           | TRIM9    | -             | 2.69E-07 | 3.85E-01 | 6.97E-04 | 3159                            |  |
| 4     | rs580399   | 1.5E+08  | 4.63E-01        | N/A       | 5     | rs9293829  | 80351685 | 8.49E-01           | RASGRF2  | -             | 2.69E-07 | 6.20E-01 | 1.19E-05 | 3160                            |  |
| 3     | rs6791296  | 62406455 | 7.93E-01        | CADPS     | 20    | rs4811223  | 49742333 | 1.48E-01           | ATP9A    | -             | 2.69E-07 | 9.23E-02 | 4.54E-04 | 3161                            |  |
| 1     | rs12022475 | 80075562 | 4.18E-02        | N/A       | 10    | rs1079505  | 3582082  | 5.85E-01           | N/A      | -             | 2.69E-07 | 3.01E-01 | 5.84E-06 | 3162                            |  |
| 10    | rs814628   | 90419632 | 7.73E-01        | LIPF      | 21    | rs2837682  | 40826362 | 6.19E-01           | DSCAM    | -             | 2.69E-07 | 1.79E-01 | 5.37E-04 | 3163                            |  |
| 13    | rs9554473  | 97892903 | 8.40E-01        | STK24     | 15    | rs9646211  | 68162014 | 4.01E-01           | TLE3     | -             | 2.69E-07 | 7.02E-01 | 8.61E-06 | 3164                            |  |
| 4     | rs17007266 | 1.43E+08 | 6.19E-01        | N/A       | 13    | rs622486   | 1.1E+08  | 1.61E-01           | COL4A1   | -             | 2.69E-07 | 1.99E-02 | 1.24E-02 | 3165                            |  |
| 6     | rs9385259  | 1.23E+08 | 3.50E-01        | PKIB      | 17    | rs3744375  | 55504527 | 3.56E-01           | HEATR6   | -             | 2.69E-07 | 8.11E-01 | 2.75E-04 | 3166                            |  |
| 3     | rs357161   | 13182536 | 8.23E-01        | N/A       | 9     | rs10819994 | 1.04E+08 | 9.58E-01           | N/A      | -             | 2.70E-07 | 7.51E-02 | 6.62E-07 | 3167                            |  |
| 1     | rs4908382  | 28156065 | 2.56E-01        | EYA3      | 3     | rs1992093  | 1.45E+08 | 9.41E-01           | C3orf58  | -             | 2.70E-07 | 8.24E-02 | 2.05E-03 | 3168                            |  |
| 7     | rs334523   | 47532029 | 7.13E-01        | TNS3      | 19    | rs2035970  | 6932763  | 4.72E-01           | EMR4P    | -             | 2.70E-07 | 8.58E-02 | 4.23E-03 | 3169                            |  |
| 17    | rs11654515 | 19736366 | 6.49E-01        | AKAP10    | 18    | rs2897347  | 72330759 | 1.71E-01           | ZNF516   | -             | 2.70E-07 | 4.63E-01 | 6.79E-05 | 3170                            |  |
| 3     | rs500607   | 8156844  | 8.97E-01        | N/A       | 9     | rs6415812  | 98927782 | 6.88E-01           | N/A      | -             | 2.70E-07 | N/A      | N/A      | 3171                            |  |
| 2     | rs12998820 | 2.03E+08 | 8.88E-01        | N/A       | 10    | rs584933   | 14435417 | 5.40E-01           | N/A      | -             | 2.70E-07 | 6.50E-03 | 9.17E-03 | 3172                            |  |
| 1     | rs10914890 | 34478745 | 5.83E-01        | N/A       | 8     | rs4242345  | 1.25E+08 | 2.11E-01           | ANXA13   | -             | 2.70E-07 | 8.19E-02 | 2.10E-07 | 3173                            |  |
| 3     | rs6776572  | 3068366  | 9.42E-01        | IL5RA     | 17    | rs925607   | 74892827 | 7.76E-01           | HRNP3    | -             | 2.70E-07 | 4.85E-01 | 6.60E-04 | 3174                            |  |
| 1     | rs2050656  | 2.36E+08 | 2.48E-01        | RYR2      | 10    | rs1226589  | 56617236 | 2.96E-01           | N/A      | -             | 2.70E-07 | 7.98E-01 | 3.29E-05 | 3175                            |  |
| 18    | rs7238168  | 32291551 | 4.02E-01        | FHOD3     | 19    | rs7246914  | 57362717 | 1.36E-01           | ZNF836   | -             | 2.70E-07 | 9.89E-01 | 1.20E-04 | 3176                            |  |
| 12    | rs4149061  | 21241935 | 7.70E-01        | SLCO1B1   | 21    | rs6586245  | 41927730 | 2.66E-01           | N/A      | -             | 2.70E-07 | 3.95E-01 | 7.59E-06 | 3177                            |  |
| 3     | rs833660   | 62527834 | 8.93E-02        | CADPS     | 20    | rs365516   | 14785965 | 7.92E-01           | MACROD2  | -             | 2.70E-07 | 9.23E-01 | 1.47E-05 | 3178                            |  |
| 5     | rs3733989  | 1.68E+08 | 2.01E-01        | ODZ2      | 18    | rs2732229  | 17142290 | 5.44E-01           | N/A      | -             | 2.70E-07 | 2.03E-01 | 3.24E-06 | 3179                            |  |
| 7     | rs17168036 | 14274731 | 2.43E-01        | DGKB      | 16    | rs17137208 | 4706598  | 2.15E-01           | C16orf71 | -             | 2.70E-07 | 5.33E-01 | 3.50E-04 | 3180                            |  |
| 7     | rs10951658 | 41755259 | 4.59E-01        | LOC285954 | 17    | rs2016126  | 70296527 | 2.16E-01           | SLC9A3R1 | -             | 2.70E-07 | 7.24E-01 | 8.88E-05 | 3181                            |  |
| 6     | rs1156086  | 27295334 | 5.88E-01        | N/A       | 15    | rs813299   | 29225595 | 8.06E-01           | N/A      | MHC           | 2.70E-07 | 8.22E-02 | 1.86E-07 | 3182                            |  |
| 5     | rs2968019  | 58380905 | 8.06E-01        | PDE4D     | 18    | rs4806     | 55146376 | 7.48E-02           | LMAN1    | -             | 2.71E-07 | 5.72E-01 | 7.97E-06 | 3183                            |  |
| 2     | rs11894115 | 2.02E+08 | 6.70E-01        | ALS2CR4   | 2     | rs4851988  | 2.4E+08  | 7.37E-01           | N/A      | -             | 2.71E-07 | 4.77E-01 | 4.70E-06 | 3184                            |  |
| 3     | rs289423   | 1.33E+08 | 7.24E-01        | N/A       | 9     | rs1334069  | 3592018  | 4.85E-01           | N/A      | -             | 2.71E-07 | 5.60E-01 | 2.91E-06 | 3185                            |  |
| 2     | rs6709267  | 1.16E+08 | 4.03E-01        | DPP10     | 9     | rs2006996  | 1.17E+08 | 2.03E-01           | N/A      | -             | 2.71E-07 | 8.81E-01 | 7.86E-05 | 3186                            |  |
| 1     | rs1025653  | 2.15E+08 | 6.15E-01        | ESRRG     | 4     | rs6832923  | 1.56E+08 | 1.41E-01           | N/A      | -             | 2.71E-07 | 9.68E-01 | 4.55E-05 | 3187                            |  |
| 6     | rs539298   | 1.61E+08 | 8.47E-02        | SLC22A3   | 22    | rs196067   | 37183623 | 7.63E-01           | KDELRC   | -             | 2.71E-07 | 3.62E-01 | 5.44E-04 | 3188                            |  |
| 4     | rs8192049  | 1.41E+08 | 5.80E-02        | MGST2     | 5     | rs4554194  | 92536080 | 4.92E-01           | N/A      | -             | 2.71E-07 | N/A      | N/A      | 3189                            |  |
| 16    | rs11644041 | 82873782 | 3.22E-01        | WFDC1     | 22    | rs3747225  | 43658162 | 1.69E-01           | PHF21B   | -             | 2.71E-07 | 2.24E-01 | 1.60E-03 | 3190                            |  |
| 2     | rs4637047  | 1.92E+08 | 5.70E-01        | N/A       | 11    | rs7946750  | 70361142 | 8.51E-02           | SHANK2   | -             | 2.71E-07 | 3.83E-01 | 1.95E-05 | 3191                            |  |
| 1     | rs2863991  | 1.07E+08 | 1.63E-01        | N/A       | 7     | rs6977428  | 53653312 | 3.71E-01           | N/A      | -             | 2.71E-07 | 5.61E-01 | 8.43E-05 | 3192                            |  |
| 8     | rs6530946  | 16099299 | 8.70E-01        | MSR1      | 11    | rs7950814  | 71905497 | 2.40E-01           | N/A      | -             | 2.71E-07 | 4.00E-01 | 4.78E-04 | 3193                            |  |
| 5     | rs1501727  | 33599737 | 3.76E-01        | ADAMTS12  | 8     | rs1907548  | 85324969 | 1.71E-01           | RALYL    | -             | 2.71E-07 | 6.81E-01 | 9.97E-05 | 3194                            |  |
| 18    | rs2032165  | 8978701  | 6.78E-01        | N/A       | 20    | rs980984   | 43766466 | 9.79E-01           | WFDC10B  | -             | 2.71E-07 | 7.69E-01 | 5.40E-04 | 3195                            |  |
| 7     | rs7789227  | 12089416 | 2.68E-01        | N/A       | 7     | rs1076303  | 71056394 | 3.08E-01           | CALN1    | -             | 2.71E-07 | 7.77E-01 | 3.82E-04 | 3196                            |  |
| 9     | rs17195438 | 79320366 | 2.00E-01        | GN/A14    | 14    | rs1712686  | 72861024 | 4.41E-01           | NUMB     | -             | 2.71E-07 | 1.12E-01 | 1.88E-03 | 3197                            |  |
| 9     | rs10813978 | 33426471 | 5.45E-01        | AQP3      | 12    | rs7310294  | 1.06E+08 | 9.82E-01           | N/A      | -             | 2.71E-07 | 2.73E-01 | 1.38E-05 | 3198                            |  |
| 11    | rs7131167  | 1.28E+08 | 6.56E-01        | N/A       | 19    | rs2033259  | 17557689 | 8.20E-01           | GLT25D1  | -             | 2.71E-07 | 7.14E-01 | 3.09E-04 | 3199                            |  |
| 4     | rs16869740 | 20152890 | 4.66E-01        | SLT12     | 7     | rs2054788  | 46218211 | 5.35E-01           | N/A      | -             | 2.71E-07 | 8.31E-01 | 1.63E-04 | 3200                            |  |
| 6     | rs130067   | 31226490 | 8.62E-01        | TCF9      | 6     | rs7570269  | 31379136 | 5.85E-01           | N/A      | MHC           | 2.72E-07 | 4.47E-01 | 1.14E-05 | 3201                            |  |
| 5     | rs2089192  | 1.7E+08  | 5.56E-01        | KCNIP1    | 7     | rs6467202  | 1.28E+08 | 4.41E-01           | FAM71F2  | -             | 2.72E-07 | 2.85E-01 | 3.67E-04 | 3202                            |  |
| 8     | rs10503998 | 37046107 | 9.54E-01        | N/A       | 12    | rs2701129  | 50715744 | 4.59E-01           | GRASP    | -             | 2.72E-07 | 7.34E-01 | 2.08E-05 | 3203                            |  |
| 2     | rs6745725  | 1.72E+08 | 7.67E-01        | N/A       | 2     | rs6434780  | 1.96E+08 | 6.88E-01           | N/A      | -             | 2.72E-07 | 7.34E-01 | 2.08E-05 | 3204                            |  |
| 11    | rs10891585 | 1.13E+08 | 3.70E-02        | TMPPRSS5  | 11    | rs11827471 | 1.2E+08  | 3.90E-01           | POU2F3   | -             | 2.72E-07 | 6.66E-01 | 2.21E-04 | 3205                            |  |
| 1     | rs6693292  | 67795756 | 4.96E-01        | N/A       | 12    | rs1168458  | 46882508 | 6.23E-01           | OR10AD1  | -             | 2.72E-0  |          |          |                                 |  |

| SNP A |            |          |                |           | SNP B |           |          |                      |           | Interaction P |          |          | Ranking  | Cluster in top 100 interactions |  |
|-------|------------|----------|----------------|-----------|-------|-----------|----------|----------------------|-----------|---------------|----------|----------|----------|---------------------------------|--|
| CHR   | SNP        | Location | gle locus P va | Gene      | CHR   | SNP       | Location | single locus P value | Gene      | MHC region    | Stage 1  | Stage 2  | Combined |                                 |  |
| 2     | rs4485562  | 2.34E+08 | 6.39E-01       | UGT1A10   | 9     | s1081468  | 38345452 | 7.63E-02             | N/A       | -             | 2.73E-07 | 7.32E-01 | 8.83E-06 | 3247                            |  |
| 3     | rs2130369  | 1.01E+08 | 7.50E-01       | C3orf26   | 8     | rs2014286 | 16951496 | 5.93E-01             | EFHA2     | -             | 2.73E-07 | 8.94E-01 | 7.81E-06 | 3248                            |  |
| 3     | rs17020557 | 2819653  | 3.47E-01       | CNTN4     | 12    | rs2722175 | 1.03E+08 | 2.80E-01             | GLT8D2    | -             | 2.73E-07 | N/A      | N/A      | 3249                            |  |
| 12    | rs10128762 | 72968165 | 7.81E-01       | N/A       | 21    | rs2824447 | 17987327 | 2.47E-01             | N/A       | -             | 2.73E-07 | 1.56E-03 | 4.24E-08 | 3250                            |  |
| 8     | rs6995339  | 62099853 | 6.64E-01       | N/A       | 22    | rs3788535 | 36863991 | 9.84E-02             | PLA2G6    | -             | 2.73E-07 | 9.32E-01 | 1.65E-05 | 3251                            |  |
| 8     | rs6995339  | 62099853 | 6.64E-01       | N/A       | 22    | rs4820315 | 36848677 | 9.84E-02             | PLA2G6    | -             | 2.73E-07 | 9.32E-01 | 1.65E-05 | 3252                            |  |
| 8     | rs6995339  | 62099853 | 6.64E-01       | N/A       | 22    | rs2076118 | 36859446 | 9.84E-02             | PLA2G6    | -             | 2.73E-07 | N/A      | N/A      | 3253                            |  |
| 4     | rs2385895  | 8068659  | 2.36E-01       | ABLIM2    | 11    | s10832368 | 15132561 | 3.47E-01             | INSC      | -             | 2.73E-07 | 4.29E-01 | 6.81E-06 | 3254                            |  |
| 6     | rs4495304  | 31188697 | 4.80E-02       | C6orf15   | 6     | rs3130534 | 31317024 | 3.50E-01             | N/A       | MHC           | 2.73E-07 | 1.21E-01 | 1.04E-06 | 3255                            |  |
| 6     | rs7456566  | 32788948 | 1.70E-01       | N/A       | 10    | rs7913408 | 52265121 | 2.80E-01             | A1CF      | MHC           | 2.74E-07 | 6.04E-02 | 1.74E-03 | 3256                            |  |
| 3     | rs6444269  | 1.89E+08 | 9.23E-01       | N/A       | 8     | rs2334792 | 1.33E+08 | 2.80E-01             | EFR3A     | -             | 2.74E-07 | 1.08E-01 | 2.19E-03 | 3257                            |  |
| 4     | rs2218313  | 1.43E+08 | 2.64E-02       | N/A       | 5     | rs4274968 | 1.48E+08 | 6.89E-01             | HTR4      | -             | 2.74E-07 | 6.72E-01 | 1.57E-04 | 3258                            |  |
| 4     | rs1824864  | 22214157 | 6.39E-01       | N/A       | 16    | rs9922832 | 49001660 | 1.60E-01             | N/A       | -             | 2.74E-07 | 8.29E-01 | 7.59E-05 | 3259                            |  |
| 7     | rs1716688  | 13068758 | 6.44E-02       | N/A       | 19    | s10411733 | 62482800 | 4.72E-01             | ZNF460    | -             | 2.74E-07 | N/A      | N/A      | 3260                            |  |
| 1     | rs12120863 | 89274110 | 9.04E-02       | GBP1      | 13    | rs2321997 | 58561359 | 4.61E-01             | N/A       | -             | 2.74E-07 | 1.55E-01 | 5.92E-07 | 3261                            |  |
| 12    | rs17624000 | 39698479 | 2.97E-02       | CNTN1     | 18    | rs168206  | 3683772  | 8.93E-01             | DLGAP1    | -             | 2.74E-07 | 4.14E-01 | 2.69E-05 | 3262                            |  |
| 6     | rs6935051  | 1.5E+08  | 5.88E-01       | RAET1L    | 3     | rs9866473 | 1.73E+08 | 6.06E-01             | PLD1      | -             | 2.74E-07 | 8.04E-01 | 4.38E-05 | 3263                            |  |
| 9     | rs11999361 | 1.18E+08 | 1.84E-01       | PAPPA     | 17    | rs9901111 | 28070943 | 8.78E-01             | MYO1D     | -             | 2.74E-07 | 8.32E-01 | 1.55E-05 | 3264                            |  |
| 2     | rs2118836  | 96526699 | 8.13E-01       | NEURL3    | 8     | rs2705034 | 17370850 | 2.09E-01             | N/A       | -             | 2.74E-07 | 9.78E-01 | 4.02E-05 | 3265                            |  |
| 8     | rs10504091 | 50923329 | 7.21E-01       | N/A       | 20    | rs6014949 | 55186217 | 1.65E-01             | BMP7      | -             | 2.74E-07 | 8.33E-02 | 4.29E-07 | 3266                            |  |
| 8     | rs13255117 | 50943966 | 7.21E-01       | N/A       | 20    | rs6014949 | 55186217 | 1.65E-01             | BMP7      | -             | 2.74E-07 | 9.60E-02 | 1.80E-03 | 3267                            |  |
| 6     | rs1739671  | 71103938 | 8.00E-01       | N/A       | 10    | rs7904018 | 7834300  | 6.41E-01             | KIN       | -             | 2.74E-07 | 1.07E-01 | 1.50E-03 | 3268                            |  |
| 11    | rs11036893 | 42422682 | 8.93E-01       | N/A       | 15    | rs598729  | 55848087 | 9.06E-01             | N/A       | -             | 2.74E-07 | 7.65E-01 | 2.47E-05 | 3269                            |  |
| 10    | rs2420724  | 1.22E+08 | 1.21E-02       | PPAPDC1A  | 11    | s10896271 | 55870151 | 4.79E-01             | OR8K1     | -             | 2.74E-07 | 8.62E-01 | 4.35E-05 | 3270                            |  |
| 10    | rs2420724  | 1.22E+08 | 1.21E-02       | PPAPDC1A  | 11    | s10896272 | 55870169 | 4.79E-01             | OR8K1     | -             | 2.74E-07 | 8.62E-01 | 4.35E-05 | 3271                            |  |
| 10    | rs2420724  | 1.22E+08 | 1.21E-02       | PPAPDC1A  | 11    | rs1945205 | 55943006 | 4.79E-01             | OR8U8     | -             | 2.74E-07 | 8.62E-01 | 4.35E-05 | 3272                            |  |
| 10    | rs2420724  | 1.22E+08 | 1.21E-02       | PPAPDC1A  | 11    | rs1945222 | 55923662 | 4.79E-01             | OR8U8     | -             | 2.74E-07 | 8.62E-01 | 4.35E-05 | 3273                            |  |
| 11    | rs454465   | 5445416  | 1.81E-01       | OR51I2    | 13    | s17058611 | 60173532 | 5.84E-01             | N/A       | -             | 2.74E-07 | N/A      | N/A      | 3274                            |  |
| 10    | rs7907344  | 10998527 | 5.91E-01       | LOC254312 | 10    | rs3814148 | 97061354 | 3.64E-01             | SORBS1    | -             | 2.74E-07 | 5.73E-01 | 7.36E-06 | 3275                            |  |
| 6     | rs6921980  | 71096916 | 8.00E-01       | N/A       | 10    | rs7904018 | 7834300  | 6.41E-01             | KIN       | -             | 2.74E-07 | 8.31E-01 | 1.15E-04 | 3276                            |  |
| 6     | rs696988   | 71095665 | 8.00E-01       | N/A       | 10    | rs7904018 | 7834300  | 6.41E-01             | KIN       | -             | 2.74E-07 | 8.31E-01 | 1.15E-04 | 3277                            |  |
| 8     | rs4831766  | 15641064 | 5.83E-01       | TUSC3     | 22    | rs735455  | 20743793 | 9.48E-01             | N/A       | -             | 2.74E-07 | N/A      | N/A      | 3278                            |  |
| 17    | rs10521258 | 13954919 | 4.46E-01       | COX10     | 21    | s22236431 | 35335609 | 4.65E-01             | RUNX1     | -             | 2.74E-07 | 2.26E-03 | 1.34E-01 | 3279                            |  |
| 6     | rs2322841  | 81319707 | 6.20E-01       | N/A       | 2     | s10930467 | 1.72E+08 | 2.77E-01             | N/A       | -             | 2.74E-07 | 2.08E-01 | 4.44E-07 | 3280                            |  |
| 6     | rs6903716  | 22064383 | 8.82E-01       | FLJ22536  | 22    | rs3827281 | 16964433 | 4.11E-01             | TUBA8     | -             | 2.74E-07 | 4.55E-01 | 1.19E-05 | 3281                            |  |
| 2     | rs2861680  | 79006430 | 1.64E-01       | N/A       | 11    | rs1397056 | 56177773 | 4.24E-01             | OR8U8     | -             | 2.74E-07 | 1.26E-02 | 1.19E-02 | 3282                            |  |
| 9     | rs1255190  | 77303509 | 6.87E-01       | MIR548H3  | 13    | rs7999126 | 86769337 | 9.01E-01             | N/A       | -             | 2.74E-07 | 6.26E-01 | 1.88E-04 | 3283                            |  |
| 6     | rs4495304  | 31188697 | 4.80E-02       | C6orf15   | 6     | rs1265156 | 31250276 | 6.76E-01             | TCF19     | MHC           | 2.74E-07 | 1.76E-01 | 1.06E-05 | 3284                            |  |
| 5     | rs1345592  | 1.69E+08 | 1.10E-01       | SLIT3     | 9     | rs1444826 | 74536439 | 2.27E-02             | TMC1      | -             | 2.74E-07 | 3.62E-01 | 6.62E-06 | 3285                            |  |
| 7     | rs4543487  | 82641622 | 3.47E-01       | PCLO      | 12    | s10506198 | 40260625 | 2.23E-01             | PDZRN4    | -             | 2.74E-07 | 5.64E-01 | 1.06E-04 | 3286                            |  |
| 3     | rs11720652 | 14636424 | 8.72E-01       | N/A       | 3     | rs4678787 | 33248482 | 1.70E-01             | SUSD5     | -             | 2.74E-07 | 6.05E-01 | 1.45E-04 | 3287                            |  |
| 4     | rs2132834  | 91787002 | 9.39E-01       | FAM190A   | 17    | rs8066993 | 75894625 | 5.64E-01             | RNF213    | -             | 2.74E-07 | 8.03E-01 | 4.55E-05 | 3288                            |  |
| 6     | rs6940982  | 81826357 | 2.92E-01       | N/A       | 5     | rs4703613 | 73144329 | 3.07E-01             | N/A       | -             | 2.75E-07 | 6.59E-01 | 1.76E-05 | 3289                            |  |
| 3     | rs4684686  | 10395875 | 7.32E-01       | ATP2B2    | 3     | rs2173911 | 1.92E+08 | 4.07E-01             | LOC647309 | -             | 2.75E-07 | 7.95E-01 | 5.12E-05 | 3290                            |  |
| 6     | rs957387   | 15429838 | 7.84E-01       | JARID2    | 21    | rs2223006 | 41035292 | 4.42E-01             | DSCAM     | -             | 2.75E-07 | 1.75E-01 | 1.89E-03 | 3291                            |  |
| 1     | rs9436816  | 68619836 | 3.94E-01       | N/A       | 20    | rs1926076 | 54314184 | 7.18E-01             | N/A       | -             | 2.75E-07 | 2.02E-01 | 1.31E-03 | 3292                            |  |
| 2     | rs897877   | 2.19E+08 | 6.02E-01       | PNKD      | 4     | rs2292837 | 1.4E+08  | 2.54E-01             | ELF2      | -             | 2.75E-07 | 3.25E-01 | 8.98E-04 | 3293                            |  |
| 3     | rs1471217  | 48359899 | 8.17E-01       | SPINK8    | 5     | rs1366397 | 23476753 | 7.74E-01             | N/A       | -             | 2.75E-07 | 1.75E-01 | 3.52E-06 | 3294                            |  |
| 6     | rs4960016  | 4633860  | 2.29E-01       | CDDL      | 2     | rs1368056 | 1.38E+08 | 7.82E-01             | THSD7B    | -             | 2.75E-07 | 5.70E-01 | 5.69E-04 | 3295                            |  |
| 10    | rs11595366 | 11454821 | 7.08E-01       | N/A       | 11    | rs2186598 | 1.05E+08 | 9.64E-01             | GRIA4     | -             | 2.75E-07 | 9.17E-01 | 1.19E-04 | 3296                            |  |
| 2     | rs6746998  | 2.09E+08 | 1.89E-01       | N/A       | 7     | rs1989886 | 20549647 | 1.18E-01             | N/A       | -             | 2.75E-07 | 6.81E-01 | 1.91E-04 | 3297                            |  |
| 7     | rs1723593  | 1.1E+08  | 5.08E-01       | N/A       | 17    | s11651333 | 11799674 | 1.96E-02             | DN/AH9    | -             | 2.75E-07 | 1.72E-01 | 4.27E-04 | 3298                            |  |
| 14    | rs2282277  | 44017413 | 1.65E-01       | N/A       | 14    | rs7156399 | 95104682 | 7.38E-01             | N/A       | -             | 2.75E-07 | 2.85E-01 | 1.80E-04 | 3299                            |  |
| 7     | rs17166711 | 13075823 | 7.09E-02       | N/A       | 19    | rs3746228 | 62496174 | 5.82E-01             | ZNF460    | -             | 2.75E-07 | 5.83E-01 | 6.75E-06 | 3300                            |  |
| 7     | rs12533128 | 13071663 | 7.09E-02       | N/A       | 19    | rs3746228 | 62496174 | 5.82E-01             | ZNF460    | -             | 2.75E-07 | 6.57E-01 | 1.02E-05 | 3301                            |  |
| 7     | rs7778887  | 13071534 | 7.09E-02       | N/A       | 19    | rs3746228 | 62496174 | 5.82E-01             | ZNF460    | -             | 2.75E-07 | 6.57E-01 | 1.02E-05 | 3302                            |  |
| 9     | rs7029669  | 1.09E+08 | 4.90E-01       | N/A       | 10    | s11187963 | 96221159 | 4.96E-01             | TBC1D12   | -             | 2.75E-07 | 8.57E-01 | 5.40E-04 | 3303                            |  |
| 3     | rs9830749  | 1.17E+08 | 3.37E-01       | LSAMP     | 8     | rs6984840 | 10169975 | 9.13E-01             | MSRA      | -             | 2.76E-07 | 5.50E-01 | 2.32E-04 | 3304                            |  |
| 14    | rs10148477 | 61340572 | 9.87E-01       | SN/APC1   | 17    | s10775406 | 42543089 | 8.16E-01             | CDC27     | -             | 2.76E-07 | 5.96E-01 | 7.04E-05 | 3305                            |  |
| 1     | rs4908382  | 28156065 | 2.56E-01       | EYA3      | 3     | rs1354496 | 1.45E+08 | 8.35E-01             | N/A       | -             | 2.76E-07 | 3.09E-02 | 3.82E-03 | 3306                            |  |
| 8     | rs879638   | 41770625 | 1.78E-01       | ANK1      | 9     | s16925271 | 7056807  | 3.11E-01             | KDM4C     | -             | 2.76E-07 | 1.55E-01 | 1.52E-03 | 3307                            |  |
| 2     | rs925751   | 1.8E+08  | 9.55E-01       | ZNF385B   | 3     | rs358741  | 1.57E+08 | 7.76E-01             | C3orf33   | -             | 2.76E-07 | 2.31E-01 | 4.83E-04 | 3308                            |  |
| 3     | rs17220622 | 46554129 | 2.14E-01       | LRRC2     | 12    | s1105848  | 1.22E+08 | 3.49E-01             | N/A       | -             | 2.76E-07 | 5.59E-01 | 3.92E-05 | 3309                            |  |
| 2     | rs6755940  | 1.61E+08 | 1.47E-01       | RBMS1     | 19    | rs8100011 | 49128573 | 3.05E-01             | ZNF45     | -             | 2.76E-07 | 6.19E-01 | 7.27E-05 | 3310                            |  |
| 3     | rs12485670 | 67534807 | 6.83E-01       | N/A       | 13    | rs1157851 | 76205508 | 6.26E-01             | N/A       | -             | 2.76E-07 | 6.38E-01 | 1.15E-05 | 3311                            |  |
| 1     | rs3738372  | 2.22E+08 | 6.49E-01       | N/A       | 7     | rs2402056 | 1.16E+08 | 1.89E-01             | TES       | -             | 2.76E-07 | 4.17E-01 | 3.42E-04 | 3312                            |  |
| 12    | rs2955503  | 22090132 | 7.55E-01       | CMAS      | 19    | rs1008076 | 3919605  | 7.65E-01             | EEF2      | -             | 2.76E-07 | 6.16E-01 | 7.49E-06 | 3313                            |  |
| 12    | rs264514   | 1.29E+08 | 5.54E-01       | TMEM132D  | 19    | rs352493  | 4131836  | 4.10E-01             | ANKRD24   | -             | 2.76E-07 | 3.01E-01 | 2.98E-03 | 3314                            |  |
| 1     | rs1501509  | 1.89E+08 | 3.10E-01       | FAM5C     | 15    | rs8040756 | 53585891 | 1.08E-01             | DYX1C1    | -             | 2.76E-07 | 2.96E-01 | 1.99E-05 | 3315                            |  |
| 8     | rs2142200  | 1.29E+08 | 3.16E-01       | N/A       | 16    | rs1657091 | 8902915  | 5.57E-01             | USP7      | -             | 2.77E-07 | 2.04E-01 | 2.23E-03 | 3316                            |  |
| 10    | rs1751291  | 4482612  | 2.98E-01       | N/A       | 16    | rs4782717 | 81167218 | 2.78E-01             | N/A       | -             | 2.77E-07 | 2.54E-01 | 5.78E-07 | 3317                            |  |
| 6     | rs1408913  | 1.65E+08 | 3.43E-01       | N/A       | 10    | s1110146  | 49638602 | 2.64E-01             | WDFY4     | -             | 2.77E-07 |          |          |                                 |  |

| SNP A |            |          |                 |          | SNP B |            |          |                    |           | Interaction P |          |          | Ranking  | Cluster in top 100 interactions |  |
|-------|------------|----------|-----------------|----------|-------|------------|----------|--------------------|-----------|---------------|----------|----------|----------|---------------------------------|--|
| CHR   | SNP        | Location | gle locus P val | Gene     | CHR   | SNP        | Location | single locus P val | Gene      | MHC region    | Stage 1  | Stage 2  | Combined |                                 |  |
| 6     | rs130067   | 31226490 | 8.62E-01        | TCF19    | 6     | rs9368675  | 31380136 | 7.91E-01           | N/A       | MHC           | 2.79E-07 | 2.15E-01 | 2.30E-06 | 3359                            |  |
| 3     | rs7641916  | 1.4E+08  | 8.44E-01        | FOXL2    | 3     | rs7641416  | 1.92E+08 | 5.75E-01           | N/A       | -             | 2.80E-07 | 6.76E-01 | 7.02E-05 | 3360                            |  |
| 3     | rs7641916  | 1.4E+08  | 8.44E-01        | FOXL2    | 3     | rs2363961  | 1.92E+08 | 5.75E-01           | N/A       | -             | 2.80E-07 | 6.97E-01 | 7.62E-05 | 3361                            |  |
| 2     | rs272118   | 1.31E+08 | 3.39E-01        | FAM123C  | 15    | rs4932557  | 89919267 | 5.50E-01           | N/A       | -             | 2.80E-07 | 9.37E-01 | 2.59E-05 | 3362                            |  |
| 3     | rs2581618  | 1.44E+08 | 9.56E-01        | N/A      | 8     | rs6996111  | 1.21E+08 | 1.55E-01           | N/A       | -             | 2.80E-07 | 4.72E-01 | 6.70E-06 | 3363                            |  |
| 5     | rs1345592  | 1.69E+08 | 1.10E-01        | SLIT3    | 9     | rs1796993  | 74505258 | 4.66E-02           | TMC1      | -             | 2.80E-07 | 6.06E-01 | 9.31E-05 | 3364                            |  |
| 5     | rs1345592  | 1.69E+08 | 1.10E-01        | SLIT3    | 9     | rs2501917  | 74505943 | 4.66E-02           | TMC1      | -             | 2.80E-07 | 6.06E-01 | 9.31E-05 | 3365                            |  |
| 5     | rs1345592  | 1.69E+08 | 1.10E-01        | SLIT3    | 9     | rs2793150  | 74509273 | 4.66E-02           | TMC1      | -             | 2.80E-07 | 6.06E-01 | 9.31E-05 | 3366                            |  |
| 7     | rs11764649 | 12537614 | 3.90E-01        | N/A      | 19    | rs735386   | 13225932 | 3.41E-01           | CACNA1A   | -             | 2.80E-07 | 2.90E-01 | 5.27E-04 | 3367                            |  |
| 2     | rs16846100 | 2.12E+08 | 9.37E-01        | ERBB4    | 3     | rs4677287  | 73598809 | 1.07E-01           | PDZRN3    | -             | 2.80E-07 | 8.21E-01 | 5.38E-05 | 3368                            |  |
| 1     | rs6540817  | 2.13E+08 | 6.69E-01        | SMYD2    | 13    | s12584295  | 1.08E+08 | 7.00E-02           | N/A       | -             | 2.80E-07 | 4.84E-01 | 2.70E-04 | 3369                            |  |
| 1     | rs6540819  | 2.13E+08 | 6.69E-01        | SMYD2    | 13    | s12584295  | 1.08E+08 | 7.00E-02           | N/A       | -             | 2.80E-07 | 4.84E-01 | 2.70E-04 | 3370                            |  |
| 5     | rs1551050  | 16586551 | 9.95E-01        | FAM134B  | 9     | rs940120   | 14896868 | 6.68E-01           | FREM1     | -             | 2.80E-07 | 9.15E-01 | 5.52E-05 | 3371                            |  |
| 7     | rs7802654  | 93731669 | 6.96E-01        | N/A      | 18    | rs273717   | 21420569 | 6.23E-01           | N/A       | -             | 2.80E-07 | 4.51E-01 | 1.52E-05 | 3372                            |  |
| 6     | rs1161761  | 1112422  | 7.67E-01        | N/A      | 7     | rs17172297 | 54147376 | 3.01E-01           | N/A       | -             | 2.80E-07 | 6.59E-01 | 1.33E-05 | 3373                            |  |
| 9     | rs12235312 | 3874879  | 9.00E-02        | GLIS3    | 15    | rs7172407  | 71637454 | 6.54E-01           | C15orf60  | -             | 2.80E-07 | 2.18E-01 | 8.82E-06 | 3374                            |  |
| 4     | rs6816078  | 1.47E+08 | 6.65E-01        | ZNF827   | 8     | s13260791  | 1105146  | 5.19E-01           | N/A       | -             | 2.81E-07 | 7.03E-01 | 2.02E-05 | 3375                            |  |
| 5     | rs1865508  | 1.05E+08 | 1.73E-01        | N/A      | 12    | s10506435  | 61930601 | 4.64E-01           | N/A       | -             | 2.81E-07 | 9.12E-01 | 2.24E-05 | 3376                            |  |
| 4     | rs13152512 | 1.66E+08 | 9.00E-01        | N/A      | 12    | s12810632  | 43268514 | 2.54E-01           | NELL2     | -             | 2.81E-07 | 1.52E-01 | 1.09E-06 | 3377                            |  |
| 1     | rs6680751  | 2.38E+08 | 8.03E-01        | FMN2     | 18    | rs1646613  | 31580770 | 2.17E-01           | N/A       | -             | 2.81E-07 | 2.41E-01 | 5.70E-04 | 3378                            |  |
| 2     | rs744556   | 1.9E+08  | 7.77E-01        | WDR75    | 8     | rs4921712  | 20314771 | 2.94E-01           | N/A       | -             | 2.81E-07 | 7.13E-01 | 3.62E-05 | 3379                            |  |
| 2     | rs10192133 | 1.61E+08 | 8.05E-01        | N/A      | 8     | rs7010864  | 58947443 | 3.33E-02           | N/A       | -             | 2.81E-07 | N/A      | N/A      | 3380                            |  |
| 4     | rs1880716  | 83866763 | 6.59E-01        | SCD5     | 12    | rs3819526  | 2306783  | 4.68E-01           | CACNA1C   | -             | 2.81E-07 | 7.49E-01 | 2.64E-05 | 3381                            |  |
| 6     | rs199090   | 23641601 | 3.11E-01        | N/A      | 21    | rs2836524  | 38867699 | 2.31E-01           | ERG       | -             | 2.81E-07 | 8.01E-01 | 1.36E-05 | 3382                            |  |
| 10    | rs1262099  | 1.08E+08 | 1.81E-01        | N/A      | 15    | rs17116911 | 21465730 | 3.33E-01           | NDN       | -             | 2.81E-07 | 1.48E-01 | 5.12E-07 | 3383                            |  |
| 10    | rs1418396  | 87690805 | 5.61E-01        | GRID1    | 18    | rs1511939  | 34221480 | 5.42E-01           | N/A       | -             | 2.81E-07 | 7.06E-01 | 1.61E-04 | 3384                            |  |
| 7     | rs7811880  | 70344437 | 5.47E-01        | WBSCR17  | 18    | rs4939970  | 46195712 | 4.86E-01           | N/A       | -             | 2.82E-07 | 6.01E-02 | 4.16E-03 | 3385                            |  |
| 3     | rs2046227  | 1.02E+08 | 6.40E-01        | GPR128   | 10    | rs947403   | 1006601  | 8.95E-01           | GTPBP4    | -             | 2.82E-07 | 8.32E-02 | 1.77E-07 | 3386                            |  |
| 7     | rs6974582  | 70343390 | 5.47E-01        | WBSCR17  | 18    | rs4939970  | 46195712 | 4.86E-01           | N/A       | -             | 2.82E-07 | N/A      | N/A      | 3387                            |  |
| 4     | rs975777   | 15927164 | 2.23E-01        | N/A      | 12    | rs7968452  | 23653255 | 2.09E-01           | SOX5      | -             | 2.82E-07 | 7.16E-01 | 1.65E-05 | 3388                            |  |
| 2     | rs1000582  | 1.69E+08 | 6.52E-01        | N/A      | 5     | rs2548373  | 42963857 | 9.66E-02           | N/A       | -             | 2.82E-07 | 1.31E-01 | 2.45E-03 | 3389                            |  |
| 6     | rs4946936  | 1.09E+08 | 2.98E-01        | FOXO3    | 13    | rs1105576  | 99178430 | 6.33E-01           | CLYBL     | -             | 2.82E-07 | 6.01E-01 | 2.14E-03 | 3390                            |  |
| 8     | rs39503    | 90848944 | 1.30E-01        | RIPK2    | 17    | s10451222  | 73195845 | 8.35E-02           | N/A       | -             | 2.82E-07 | 9.34E-02 | 1.33E-06 | 3391                            |  |
| 8     | rs447618   | 90854822 | 1.30E-01        | RIPK2    | 17    | s10451222  | 73195845 | 8.35E-02           | N/A       | -             | 2.82E-07 | 9.34E-02 | 1.33E-06 | 3392                            |  |
| 7     | rs7792262  | 23882268 | 8.84E-01        | N/A      | 20    | rs726207   | 15962926 | 6.80E-01           | MACROD2   | -             | 2.82E-07 | 5.32E-01 | 4.68E-04 | 3393                            |  |
| 4     | rs6812217  | 1.59E+08 | 4.71E-01        | N/A      | 10    | rs1930494  | 59537766 | 9.24E-01           | N/A       | -             | 2.82E-07 | 3.54E-01 | 2.35E-06 | 3394                            |  |
| 7     | rs205764   | 1.3E+08  | 9.73E-01        | N/A      | 16    | s12444248  | 51987801 | 1.87E-01           | N/A       | -             | 2.83E-07 | 9.29E-01 | 3.46E-05 | 3395                            |  |
| 7     | rs2158629  | 4334226  | 1.19E-01        | N/A      | 14    | rs2238233  | 71761360 | 6.63E-01           | RGS6      | -             | 2.83E-07 | 2.46E-01 | 4.63E-04 | 3396                            |  |
| 2     | rs4954160  | 1.35E+08 | 3.71E-02        | TMEM163  | 13    | rs9506820  | 21758453 | 5.80E-01           | N/A       | -             | 2.83E-07 | 6.10E-01 | 9.68E-04 | 3397                            |  |
| 1     | rs807247   | 25993456 | 5.33E-01        | MAN1C1   | 11    | s11225045  | 1.01E+08 | 7.75E-01           | ANGPTL5   | -             | 2.83E-07 | 4.43E-01 | 2.13E-05 | 3398                            |  |
| 6     | rs1006012  | 53966408 | 8.93E-01        | N/A      | 1     | rs4653960  | 2.27E+08 | 9.98E-02           | HIST3H2A  | -             | 2.83E-07 | 8.75E-01 | 1.09E-04 | 3399                            |  |
| 2     | rs6432974  | 1.68E+08 | 4.29E-01        | XIRP2    | 19    | rs889362   | 18619255 | 5.85E-02           | KLHL26    | -             | 2.83E-07 | 7.64E-02 | 1.15E-03 | 3400                            |  |
| 8     | rs4870982  | 1.28E+08 | 2.89E-01        | N/A      | 16    | rs2968161  | 83529138 | 3.80E-04           | N/A       | -             | 2.83E-07 | 2.45E-01 | 3.47E-06 | 3401                            |  |
| 2     | rs6729727  | 1.01E+08 | 8.25E-01        | NPAS2    | 8     | rs9329273  | 8509914  | 3.41E-02           | N/A       | -             | 2.83E-07 | 9.19E-01 | 1.04E-04 | 3402                            |  |
| 3     | rs735659   | 15198998 | 4.45E-01        | DVWA     | 22    | rs7364173  | 49023156 | 5.00E-01           | HDAC10    | -             | 2.83E-07 | 6.52E-01 | 1.44E-05 | 3403                            |  |
| 2     | rs7558364  | 1.8E+08  | 8.23E-01        | ZNF385B  | 3     | rs358741   | 1.57E+08 | 8.76E-01           | C3orf33   | -             | 2.83E-07 | 7.67E-01 | 6.10E-04 | 3404                            |  |
| 8     | rs2003423  | 1340421  | 5.15E-01        | C8orf12  | 15    | s11247345  | 96851676 | 8.76E-01           | FAM169B   | -             | 2.83E-07 | 2.37E-01 | 2.11E-05 | 3405                            |  |
| 6     | rs2243384  | 1.18E+08 | 3.68E-02        | ROS1     | 9     | rs10820964 | 94081457 | 9.62E-01           | IARS      | -             | 2.83E-07 | 4.90E-01 | 3.12E-06 | 3406                            |  |
| 2     | rs1364058  | 8067078  | 9.94E-01        | N/A      | 3     | rs6549282  | 70287533 | 7.17E-01           | N/A       | -             | 2.83E-07 | 8.70E-01 | 2.59E-05 | 3407                            |  |
| 11    | rs11234627 | 85776380 | 8.56E-01        | CCDC81   | 16    | rs1461184  | 62565898 | 5.10E-01           | N/A       | -             | 2.83E-07 | N/A      | N/A      | 3408                            |  |
| 2     | rs6705138  | 25441355 | 5.87E-01        | DTNB     | 11    | rs6483327  | 93743115 | 6.80E-01           | GPR83     | -             | 2.83E-07 | 1.22E-02 | 1.29E-07 | 3409                            |  |
| 8     | rs4732690  | 29460028 | 5.69E-01        | N/A      | 17    | rs6502931  | 6061766  | 3.16E-01           | N/A       | -             | 2.83E-07 | 1.77E-01 | 1.43E-06 | 3410                            |  |
| 3     | rs3755579  | 1.21E+08 | 5.30E-01        | KTELC1   | 18    | rs7240925  | 20484577 | 1.06E-01           | N/A       | -             | 2.83E-07 | 3.88E-01 | 8.59E-06 | 3411                            |  |
| 4     | rs12498340 | 56906109 | 5.52E-01        | KIAA1211 | 16    | s13332555  | 54442500 | 6.18E-01           | N/A       | -             | 2.83E-07 | 3.88E-01 | 8.59E-06 | 3412                            |  |
| 6     | rs9348687  | 25700468 | 5.86E-01        | N/A      | 6     | rs2239524  | 31233548 | 1.08E-02           | TCF19     | MHC           | 2.83E-07 | 9.58E-01 | 1.12E-04 | 3413                            |  |
| 3     | rs1599796  | 1.21E+08 | 5.30E-01        | CD80     | 18    | rs7240925  | 20484577 | 1.06E-01           | N/A       | -             | 2.83E-07 | 9.59E-01 | 1.01E-04 | 3414                            |  |
| 6     | rs9455997  | 1.68E+08 | 8.19E-01        | N/A      | 11    | rs1284108  | 93138481 | 8.91E-01           | MED17     | -             | 2.84E-07 | 2.63E-01 | 5.58E-04 | 3415                            |  |
| 10    | rs4253060  | 50397793 | 2.08E-01        | PGBD3    | 12    | rs763948   | 66442193 | 9.93E-01           | N/A       | -             | 2.84E-07 | N/A      | N/A      | 3416                            |  |
| 2     | rs6734108  | 1.05E+08 | 1.25E-01        | N/A      | 9     | rs4240425  | 1.3E+08  | 1.35E-01           | SLC25A25  | -             | 2.84E-07 | 2.41E-01 | 2.75E-03 | 3417                            |  |
| 4     | rs2857960  | 3710410  | 7.21E-01        | N/A      | 5     | rs6881045  | 1.24E+08 | 9.79E-01           | N/A       | -             | 2.84E-07 | 3.25E-01 | 1.49E-06 | 3418                            |  |
| 13    | rs9533456  | 42791004 | 9.75E-01        | ENOX1    | 14    | rs8015016  | 95192161 | 2.86E-02           | TCL6      | -             | 2.84E-07 | 4.54E-01 | 5.33E-06 | 3419                            |  |
| 11    | rs10741762 | 19179719 | 7.95E-01        | CSRP3    | 16    | s12930681  | 9528370  | 8.01E-04           | N/A       | -             | 2.84E-07 | 8.29E-01 | 6.65E-05 | 3420                            |  |
| 2     | rs934748   | 1.13E+08 | 2.21E-01        | CHCHD5   | 8     | s12678304  | 87729756 | 1.07E-01           | CNGB3     | -             | 2.84E-07 | 1.48E-01 | 1.08E-06 | 3421                            |  |
| 1     | rs12078797 | 2.18E+08 | 8.87E-01        | N/A      | 2     | rs7604762  | 66478879 | 3.18E-01           | N/A       | -             | 2.84E-07 | 2.49E-01 | 1.00E-06 | 3422                            |  |
| 3     | rs7617433  | 78966169 | 8.31E-02        | ROBO1    | 21    | rs2007397  | 41438062 | 1.27E-02           | C21orf130 | -             | 2.84E-07 | 9.32E-02 | 5.61E-07 | 3423                            |  |
| 4     | rs11942220 | 93558414 | 7.39E-01        | GRID2    | 20    | rs1361514  | 17060688 | 5.93E-01           | N/A       | -             | 2.84E-07 | 3.32E-01 | 3.81E-06 | 3424                            |  |
| 11    | rs1790474  | 1.19E+08 | 4.13E-01        | N/A      | 15    | s12898866  | 69899972 | 9.08E-01           | MYO9A     | -             | 2.84E-07 | 9.13E-01 | 7.66E-05 | 3425                            |  |
| 5     | rs1544028  | 1.37E+08 | 7.42E-01        | SPOCK1   | 18    | s12960235  | 59404470 | 6.14E-01           | SERPINB12 | -             | 2.84E-07 | 1.14E-01 | 1.25E-06 | 3426                            |  |
| 12    | rs6488713  | 14834183 | 9.01E-01        | WBP11    | 13    | rs9541996  | 34200700 | 9.17E-01           | N/A       | -             | 2.84E-07 | 1.94E-01 | 3.37E-06 | 3427                            |  |
| 6     | rs2243384  | 1.18E+08 | 3.68E-02        | ROS1     | 9     | s10739921  | 94091902 | 9.03E-01           | IARS      | -             | 2.84E-07 | 9.55E-01 | 1.43E-04 | 3428                            |  |
| 6     | rs2243384  | 1.18E+08 | 3.68E-02        | ROS1     | 9     | rs7023004  | 94138533 | 9.03E-01           | CENPP     | -             | 2.84E-07 | 9.55E-01 | 1.43E-04 | 3429                            |  |
| 5     | rs1506174  | 40169821 | 1.82E-01        | N/A      | 17    | rs3809882  | 7940314  | 7.25E-01           | N/A       | -             | 2.84E-07 | 6.83E-01 | 1.17E-04 | 3430                            |  |
| 2     |            |          |                 |          |       |            |          |                    |           |               |          |          |          |                                 |  |

| SNP A |            |          |                 |           | SNP B |           |          |                    |          | Interaction P |          |          | Ranking  | Cluster in top 100 interactions |  |
|-------|------------|----------|-----------------|-----------|-------|-----------|----------|--------------------|----------|---------------|----------|----------|----------|---------------------------------|--|
| CHR   | SNP        | Location | gle locus P val | Gene      | CHR   | SNP       | Location | single locus P val | Gene     | MHC region    | Stage 1  | Stage 2  | Combined |                                 |  |
| 7     | rs7793289  | 13073946 | 6.14E-02        | N/A       | 19    | s10411733 | 62482800 | 4.72E-01           | ZNF460   | -             | 2.87E-07 | 7.28E-01 | 9.77E-06 | 3471                            |  |
| 7     | rs2160193  | 13070161 | 6.14E-02        | N/A       | 19    | s10411733 | 62482800 | 4.72E-01           | ZNF460   | -             | 2.87E-07 | 7.53E-01 | 1.09E-05 | 3472                            |  |
| 8     | rs10504517 | 72980330 | 1.44E-01        | N/A       | 10    | rs2014307 | 1.24E+08 | 1.18E-01           | HTRA1    | -             | 2.87E-07 | 7.94E-01 | 5.23E-05 | 3473                            |  |
| 5     | rs389333   | 1.25E+08 | 6.22E-01        | N/A       | 14    | rs4465523 | 19983363 | 4.03E-01           | TMEM55B  | -             | 2.87E-07 | 9.99E-01 | 7.65E-05 | 3474                            |  |
| 5     | rs420280   | 1.25E+08 | 6.22E-01        | N/A       | 14    | rs4465523 | 19983363 | 4.03E-01           | TMEM55B  | -             | 2.87E-07 | 9.99E-01 | 7.65E-05 | 3475                            |  |
| 7     | rs6971207  | 1.39E+08 | 3.93E-01        | TXAS1     | 15    | s1051921f | 76977187 | 4.02E-01           | MORF4L1  | -             | 2.87E-07 | 2.11E-01 | 9.24E-04 | 3476                            |  |
| 8     | rs6991392  | 1893230  | 9.90E-01        | ARHGEF10  | 14    | rs2749527 | 93896821 | 7.03E-01           | SERPINA1 | -             | 2.87E-07 | 2.48E-01 | 2.64E-06 | 3477                            |  |
| 8     | rs2278092  | 30721347 | 5.96E-01        | N/A       | 22    | rs2013516 | 17752656 | 5.10E-01           | HIRA     | -             | 2.87E-07 | 9.27E-01 | 1.51E-04 | 3478                            |  |
| 1     | rs4412572  | 1.61E+08 | 5.04E-01        | N/A       | 4     | rs4401481 | 60397850 | 3.91E-01           | N/A      | -             | 2.87E-07 | N/A      | N/A      | 3479                            |  |
| 6     | rs1367211  | 1.61E+08 | 9.60E-01        | LPA       | 18    | s1296777f | 65421552 | 6.14E-01           | DOK6     | -             | 2.87E-07 | 5.40E-01 | 5.49E-05 | 3480                            |  |
| 7     | rs6966644  | 19360045 | 3.98E-01        | N/A       | 13    | rs6562694 | 71573602 | 8.06E-02           | N/A      | -             | 2.87E-07 | 6.17E-01 | 2.01E-05 | 3481                            |  |
| 2     | rs13382215 | 2.15E+08 | 7.25E-01        | VWZC2L    | 14    | s1048371f | 59369282 | 2.76E-01           | RTN1     | -             | 2.87E-07 | 4.11E-01 | 1.64E-05 | 3482                            |  |
| 1     | rs668800   | 1.15E+08 | 4.26E-02        | N/A       | 11    | rs648067  | 1.19E+08 | 4.25E-01           | N/A      | -             | 2.87E-07 | 6.16E-01 | 7.44E-06 | 3483                            |  |
| 4     | rs7680027  | 15974946 | 3.22E-01        | N/A       | 12    | rs7968452 | 23653255 | 2.09E-01           | SOX5     | -             | 2.87E-07 | 7.80E-01 | 2.04E-05 | 3484                            |  |
| 5     | rs985765   | 13447171 | 2.43E-01        | N/A       | 13    | rs14067   | 1.13E+08 | 4.50E-01           | ADPRHL1  | -             | 2.87E-07 | 4.28E-01 | 5.74E-04 | 3485                            |  |
| 1     | rs12742458 | 30349160 | 3.34E-01        | N/A       | 13    | rs906790  | 75633401 | 6.15E-01           | N/A      | -             | 2.87E-07 | 1.85E-01 | 8.58E-04 | 3486                            |  |
| 4     | rs13142103 | 55594043 | 9.87E-01        | N/A       | 7     | rs320088  | 29049787 | 7.65E-01           | CPVL     | -             | 2.87E-07 | 9.30E-01 | 9.27E-05 | 3487                            |  |
| 4     | rs4864949  | 55594043 | 9.87E-01        | N/A       | 7     | rs320088  | 29049787 | 7.65E-01           | CPVL     | -             | 2.87E-07 | 9.30E-01 | 9.27E-05 | 3488                            |  |
| 6     | rs9473594  | 49642288 | 8.88E-01        | C6orf141  | 1     | s1204851f | 1.91E+08 | 7.87E-01           | RGS21    | -             | 2.87E-07 | 6.04E-01 | 2.14E-04 | 3489                            |  |
| 2     | rs7605424  | 80155080 | 6.72E-01        | CTNNA2    | 7     | rs1029465 | 11478639 | 1.64E-01           | THSD7A   | -             | 2.87E-07 | 8.14E-01 | 1.03E-04 | 3490                            |  |
| 2     | rs3791696  | 2.12E+08 | 5.89E-01        | ERBB4     | 3     | rs4677287 | 73598809 | 1.07E-01           | PDZRN3   | -             | 2.87E-07 | 6.50E-01 | 1.44E-05 | 3491                            |  |
| 4     | rs12506975 | 30096720 | 7.56E-01        | N/A       | 19    | rs892023  | 19524850 | 7.75E-01           | YJEFN3   | -             | 2.88E-07 | 1.57E-01 | 1.53E-06 | 3492                            |  |
| 2     | rs7582124  | 1.6E+08  | 9.56E-01        | 7-Mar     | 18    | rs9948462 | 7066836  | 6.08E-01           | LAMA1    | -             | 2.88E-07 | 8.72E-01 | 1.02E-04 | 3493                            |  |
| 1     | rs1342780  | 90971264 | 5.87E-01        | BARHL2    | 9     | rs2182549 | 12785679 | 3.78E-01           | C9orf150 | -             | 2.88E-07 | 9.61E-01 | 9.34E-05 | 3494                            |  |
| 1     | rs1924250  | 2.07E+08 | 6.70E-01        | N/A       | 15    | rs1484197 | 44455257 | 4.98E-02           | N/A      | -             | 2.88E-07 | 6.62E-01 | 4.33E-05 | 3495                            |  |
| 1     | rs758518   | 1.17E+08 | 9.71E-02        | CD58      | 4     | s1311620f | 15039724 | 6.35E-01           | C1QTNF7  | -             | 2.88E-07 | 7.19E-01 | 4.23E-04 | 3496                            |  |
| 4     | rs12233914 | 19906678 | 2.98E-01        | SLIT2     | 14    | s1115922f | 76190497 | 8.25E-03           | N/A      | -             | 2.88E-07 | 3.93E-01 | 4.21E-07 | 3497                            |  |
| 1     | rs2075973  | 9278484  | 5.68E-01        | SPSB1     | 3     | rs1349008 | 76804103 | 8.47E-01           | N/A      | -             | 2.88E-07 | 3.53E-01 | 1.14E-05 | 3498                            |  |
| 5     | rs12657273 | 1.07E+08 | 7.80E-01        | N/A       | 10    | rs538037  | 29481749 | 5.75E-01           | N/A      | -             | 2.88E-07 | 3.89E-01 | 5.41E-04 | 3499                            |  |
| 16    | rs330149   | 20959502 | 4.26E-01        | DN/AH3    | 16    | rs2582597 | 58683286 | 3.67E-01           | N/A      | -             | 2.88E-07 | 5.16E-01 | 1.39E-04 | 3500                            |  |
| 3     | rs4530474  | 1.25E+08 | 8.94E-01        | MYLK      | 12    | rs13311   | 1.12E+08 | 1.12E-01           | OAS2     | -             | 2.88E-07 | 7.50E-01 | 1.02E-05 | 3501                            |  |
| 1     | rs2240335  | 17547124 | 1.17E-02        | PADI4     | 13    | rs4885001 | 71857395 | 7.48E-01           | N/A      | -             | 2.88E-07 | 7.85E-01 | 5.56E-05 | 3502                            |  |
| 12    | rs9971641  | 86289970 | 2.82E-01        | N/A       | 22    | rs5758913 | 41478203 | 8.66E-01           | N/A      | -             | 2.88E-07 | 4.96E-01 | 2.51E-04 | 3503                            |  |
| 2     | rs4146082  | 1.61E+08 | 5.88E-01        | N/A       | 8     | rs7010864 | 58947443 | 3.33E-02           | N/A      | -             | 2.89E-07 | 8.84E-01 | 1.36E-05 | 3504                            |  |
| 3     | rs1732187  | 1.11E+08 | 4.81E-01        | N/A       | 10    | rs4880885 | 1632428  | 1.34E-01           | ADARB2   | -             | 2.89E-07 | 1.05E-01 | 3.79E-03 | 3505                            |  |
| 4     | rs4693052  | 83873487 | 9.94E-01        | SCD5      | 19    | rs3787058 | 6184431  | 7.90E-01           | MLLT1    | -             | 2.89E-07 | 7.01E-01 | 1.72E-05 | 3506                            |  |
| 10    | rs4751939  | 1.18E+08 | 5.40E-01        | ATRN1     | 15    | rs1814767 | 21249101 | 1.49E-01           | N/A      | -             | 2.89E-07 | 8.99E-01 | 3.07E-05 | 3507                            |  |
| 4     | rs148155   | 89273691 | 8.33E-01        | ABCG2     | 9     | s10739694 | 1.3E+08  | 7.73E-01           | SH2D3C   | -             | 2.89E-07 | 5.20E-01 | 4.56E-05 | 3508                            |  |
| 7     | rs2058152  | 13100464 | 3.88E-02        | N/A       | 19    | rs1859955 | 62514181 | 6.47E-01           | ZNF460   | -             | 2.89E-07 | 6.13E-01 | 5.87E-06 | 3509                            |  |
| 7     | rs7784901  | 13097171 | 3.88E-02        | N/A       | 19    | rs1859955 | 62514181 | 6.47E-01           | ZNF460   | -             | 2.89E-07 | 6.13E-01 | 5.87E-06 | 3510                            |  |
| 3     | rs4687253  | 1.93E+08 | 8.71E-01        | N/A       | 20    | rs6012416 | 46467236 | 9.43E-01           | N/A      | -             | 2.89E-07 | 2.37E-01 | 1.92E-03 | 3511                            |  |
| 2     | rs13422673 | 1.55E+08 | 8.42E-01        | N/A       | 8     | rs7829925 | 83586789 | 7.73E-01           | N/A      | -             | 2.89E-07 | 3.85E-01 | 3.02E-06 | 3512                            |  |
| 8     | rs7003953  | 21660734 | 6.22E-02        | GFRA2     | 14    | rs179247  | 80502299 | 3.28E-01           | TSHR     | -             | 2.89E-07 | 4.50E-01 | 2.99E-04 | 3513                            |  |
| 5     | rs2896245  | 17182725 | 3.89E-01        | LOC285696 | 9     | rs4879801 | 34499746 | 6.35E-01           | DN/A11   | -             | 2.89E-07 | 5.43E-01 | 5.33E-04 | 3514                            |  |
| 1     | rs3125923  | 68631067 | 2.98E-01        | N/A       | 20    | rs1886956 | 54313803 | 5.96E-01           | N/A      | -             | 2.90E-07 | 3.86E-02 | 6.78E-03 | 3515                            |  |
| 2     | rs6705773  | 2.21E+08 | 9.29E-01        | N/A       | 5     | s1015550f | 1.36E+08 | 2.98E-01           | N/A      | -             | 2.90E-07 | 4.95E-01 | 2.04E-05 | 3516                            |  |
| 3     | rs11130751 | 59993955 | 7.42E-01        | PHIT      | 5     | rs4078802 | 1063083  | 2.79E-01           | NKD2     | -             | 2.90E-07 | 9.18E-01 | 7.77E-05 | 3517                            |  |
| 14    | rs2239578  | 22973220 | 5.10E-01        | MYH7      | 16    | s1259932f | 47343323 | 3.80E-01           | N/A      | -             | 2.90E-07 | 9.24E-01 | 3.14E-05 | 3518                            |  |
| 1     | rs4926345  | 68733064 | 5.87E-01        | DEPDC1    | 14    | s1013321f | 87424875 | 4.38E-01           | N/A      | -             | 2.90E-07 | 9.31E-01 | 2.90E-04 | 3519                            |  |
| 1     | rs7527841  | 68708712 | 5.87E-01        | DEPDC1    | 14    | s1013321f | 87424875 | 4.38E-01           | N/A      | -             | 2.90E-07 | 9.31E-01 | 2.90E-04 | 3520                            |  |
| 5     | rs244603   | 50958653 | 1.09E-01        | N/A       | 18    | rs1566819 | 24374735 | 1.49E-01           | N/A      | -             | 2.90E-07 | 6.59E-01 | 1.98E-05 | 3521                            |  |
| 5     | rs244603   | 50958653 | 1.09E-01        | N/A       | 18    | rs79500   | 24378686 | 1.49E-01           | N/A      | -             | 2.90E-07 | 6.59E-01 | 1.98E-05 | 3522                            |  |
| 7     | rs6946058  | 1.16E+08 | 1.44E-02        | TES       | 22    | rs4822134 | 41197276 | 7.40E-01           | N/A      | -             | 2.90E-07 | 7.28E-01 | 1.29E-05 | 3523                            |  |
| 5     | rs244552   | 50978106 | 1.09E-01        | N/A       | 18    | rs1566819 | 24374735 | 1.49E-01           | N/A      | -             | 2.90E-07 | 7.37E-01 | 2.71E-05 | 3524                            |  |
| 5     | rs244552   | 50978106 | 1.09E-01        | N/A       | 18    | rs79500   | 24378686 | 1.49E-01           | N/A      | -             | 2.90E-07 | 7.37E-01 | 2.71E-05 | 3525                            |  |
| 5     | rs36271    | 50983810 | 1.09E-01        | N/A       | 18    | rs1566819 | 24374735 | 1.49E-01           | N/A      | -             | 2.90E-07 | 7.70E-01 | 2.95E-05 | 3526                            |  |
| 5     | rs36271    | 50983810 | 1.09E-01        | N/A       | 18    | rs79500   | 24378686 | 1.49E-01           | N/A      | -             | 2.90E-07 | 7.70E-01 | 2.95E-05 | 3527                            |  |
| 1     | rs6424449  | 72056794 | 4.47E-01        | NEGR1     | 1     | s1713151f | 91888607 | 9.27E-01           | HSP90B3P | -             | 2.90E-07 | 4.23E-01 | 4.82E-04 | 3528                            |  |
| 5     | rs745749   | 1.8E+08  | 5.30E-01        | MAPK9     | 12    | rs1921484 | 74609258 | 7.98E-01           | N/A      | -             | 2.90E-07 | N/A      | N/A      | 3529                            |  |
| 3     | rs1348994  | 1.1E+08  | 2.37E-01        | TRAT1     | 11    | rs7947377 | 792370   | 2.26E-01           | NLRP10   | -             | 2.90E-07 | 1.40E-01 | 1.11E-03 | 3530                            |  |
| 4     | rs6850999  | 80720962 | 6.97E-02        | N/A       | 7     | rs9886302 | 70389420 | 4.37E-01           | WBSCR17  | -             | 2.90E-07 | 2.93E-01 | 5.79E-06 | 3531                            |  |
| 4     | rs2218313  | 1.43E+08 | 2.64E-02        | N/A       | 5     | s1051561f | 1.48E+08 | 5.36E-01           | FBXO38   | -             | 2.90E-07 | 2.73E-01 | 9.65E-04 | 3532                            |  |
| 11    | rs986656   | 19488217 | 3.12E-01        | N/AV2     | 18    | s1295426f | 18612312 | 2.06E-01           | N/A      | -             | 2.90E-07 | 6.28E-01 | 2.69E-04 | 3533                            |  |
| 2     | rs12612135 | 1.39E+08 | 9.60E-02        | N/A       | 13    | rs4770601 | 23608111 | 1.76E-02           | N/A      | -             | 2.91E-07 | 2.50E-01 | 5.58E-06 | 3534                            |  |
| 3     | rs13317017 | 1.01E+08 | 6.80E-01        | FILIP1L   | 9     | rs4877434 | 90080934 | 9.39E-01           | N/A      | -             | 2.91E-07 | 2.91E-01 | 3.46E-03 | 3535                            |  |
| 3     | rs793440   | 1.01E+08 | 6.80E-01        | FILIP1L   | 9     | rs4877434 | 90080934 | 9.39E-01           | N/A      | -             | 2.91E-07 | 2.91E-01 | 3.46E-03 | 3536                            |  |
| 6     | rs4839850  | 97191959 | 4.09E-01        | N/A       | 2     | rs6752043 | 75858330 | 6.70E-03           | N/A      | -             | 2.91E-07 | 3.49E-01 | 1.03E-04 | 3537                            |  |
| 4     | rs3113765  | 1.82E+08 | 5.10E-01        | N/A       | 18    | rs1430916 | 38525965 | 9.25E-01           | N/A      | -             | 2.91E-07 | 3.97E-01 | 1.09E-05 | 3538                            |  |
| 18    | rs12969440 | 65333980 | 9.48E-01        | DOK6      | 20    | rs6123631 | 54828815 | 2.98E-01           | N/A      | -             | 2.91E-07 | 7.54E-01 | 4.41E-05 | 3539                            |  |
| 6     | rs1555064  | 1.64E+08 | 2.00E-01        | PACRG     | 14    | rs2293702 | 21071787 | 8.99E-01           | SALL2    | -             | 2.91E-07 | 7.31E-01 | 2.81E-05 | 3540                            |  |
| 8     | rs9643233  | 1.29E+08 | 2.00E-01        | N/A       | 16    | rs30781   | 8891770  | 8.45E-01           | USP7     | -             | 2.91E-07 | 5.38E-01 | 8.03E-04 | 3541                            |  |
| 5     | rs31226    | 53363328 | 3.70E-01        | ARL15     | 17    | rs820215  | 71205405 | 4.61E-01           | SAP30BP  | -             | 2.91E-07 | 7.26E-01 | 2.09E-04 | 3542                            |  |
| 11    | rs         |          |                 |           |       |           |          |                    |          |               |          |          |          |                                 |  |

| SNP A |            |          |                 |           | SNP B |           |          |                    |          | Interaction P |          |          | Ranking  | Cluster in top 100 interactions |  |
|-------|------------|----------|-----------------|-----------|-------|-----------|----------|--------------------|----------|---------------|----------|----------|----------|---------------------------------|--|
| CHR   | SNP        | Location | gle locus P val | Gene      | CHR   | SNP       | Location | single locus P val | Gene     | MHC region    | Stage 1  | Stage 2  | Combined |                                 |  |
| 2     | rs7584395  | 1.16E+08 | 2.99E-01        | DPP10     | 16    | s1186327  | 82980316 | 3.69E-01           | ATP2C2   | -             | 2.94E-07 | 1.49E-01 | 9.41E-04 | 3583                            |  |
| 11    | rs7104953  | 1.31E+08 | 6.58E-01        | NTM       | 20    | rs6114758 | 2453124  | 2.23E-01           | TMC2     | -             | 2.94E-07 | 8.12E-01 | 3.81E-04 | 3584                            |  |
| 5     | rs1173773  | 32786740 | 3.89E-01        | NPR3      | 5     | s11242595 | 1.06E+08 | 2.21E-01           | N/A      | -             | 2.94E-07 | 7.58E-01 | 9.58E-05 | 3585                            |  |
| 6     | rs2146178  | 1.14E+08 | 8.83E-01        | FLJ34503  | 7     | rs9638081 | 1.56E+08 | 5.16E-02           | N/A      | -             | 2.94E-07 | 8.47E-01 | 7.06E-05 | 3586                            |  |
| 6     | rs2273006  | 34959112 | 4.80E-01        | ANKS1A    | 9     | rs372957  | 31962985 | 1.19E-01           | N/A      | MHC           | 2.94E-07 | 8.60E-01 | 2.23E-05 | 3587                            |  |
| 6     | rs2273006  | 34959112 | 4.80E-01        | ANKS1A    | 9     | rs453019  | 31975376 | 1.19E-01           | N/A      | MHC           | 2.94E-07 | 4.40E-01 | 1.23E-03 | 3588                            |  |
| 5     | rs6870010  | 1.54E+08 | 8.69E-01        | GALNT10   | 7     | rs4719913 | 27899757 | 3.28E-01           | JAZF1    | -             | 2.95E-07 | 6.12E-01 | 1.02E-04 | 3589                            |  |
| 10    | rs1413615  | 99793187 | 9.45E-01        | CRTAC1    | 13    | rs2018259 | 52421953 | 7.74E-02           | N/A      | -             | 2.95E-07 | 2.62E-03 | 1.10E-08 | 3590                            |  |
| 4     | rs1513765  | 1.39E+08 | 1.21E-01        | N/A       | 15    | rs745103  | 65222129 | 3.01E-01           | SMAD3    | -             | 2.95E-07 | 3.28E-01 | 8.26E-06 | 3591                            |  |
| 3     | rs902982   | 4568188  | 8.29E-02        | ITPR1     | 3     | rs2324938 | 86096826 | 5.01E-01           | CADM2    | -             | 2.95E-07 | 4.04E-01 | 7.62E-06 | 3592                            |  |
| 9     | rs1155556  | 1.19E+08 | 8.36E-01        | ASTN2     | 17    | rs801259  | 34580691 | 9.50E-04           | PLXDC1   | -             | 2.95E-07 | 5.49E-01 | 1.37E-04 | 3593                            |  |
| 10    | rs10736121 | 99796738 | 9.45E-01        | CRTAC1    | 13    | rs2018259 | 52421953 | 7.74E-02           | N/A      | -             | 2.95E-07 | N/A      | N/A      | 3594                            |  |
| 10    | rs11189926 | 1.01E+08 | 8.77E-01        | HPSE2     | 12    | s11047795 | 25103308 | 7.94E-02           | LRMP     | -             | 2.95E-07 | 1.88E-01 | 3.13E-06 | 3595                            |  |
| 2     | rs13014016 | 2.34E+08 | 6.19E-01        | DGKD      | 10    | rs751498  | 13969136 | 5.59E-01           | FRMD4A   | -             | 2.95E-07 | 9.78E-02 | 4.18E-03 | 3596                            |  |
| 2     | rs1523300  | 70622873 | 3.40E-01        | TGFA      | 20    | rs2868802 | 45608177 | 5.62E-01           | N/A      | -             | 2.95E-07 | 8.05E-01 | 1.20E-04 | 3597                            |  |
| 1     | rs17012944 | 2.07E+08 | 8.92E-01        | N/A       | 16    | rs2865585 | 12636088 | 7.51E-01           | N/A      | -             | 2.95E-07 | 3.37E-01 | 3.06E-06 | 3598                            |  |
| 2     | rs17676196 | 2.3E+08  | 2.82E-01        | PID1      | 18    | rs2541872 | 61783932 | 3.81E-01           | N/A      | -             | 2.95E-07 | 4.57E-01 | 1.08E-04 | 3599                            |  |
| 3     | rs7616728  | 26680641 | 8.92E-01        | LRRRC3B   | 5     | rs7380062 | 1.39E+08 | 2.47E-01           | ECSCR    | -             | 2.95E-07 | 9.89E-01 | 2.03E-04 | 3600                            |  |
| 8     | rs471757   | 1.03E+08 | 7.69E-01        | GRHL2     | 11    | rs483027  | 1.26E+08 | 5.79E-01           | KIRREL3  | -             | 2.95E-07 | 3.38E-01 | 1.52E-06 | 3601                            |  |
| 6     | rs2876453  | 17678979 | 2.75E-01        | CAP2      | 7     | s11772815 | 28357572 | 3.06E-01           | CREB5    | -             | 2.95E-07 | 9.89E-01 | 6.68E-05 | 3602                            |  |
| 11    | rs1784359  | 1.23E+08 | 2.38E-01        | GRAMD1B   | 18    | rs9958503 | 53362220 | 6.07E-01           | FECH     | -             | 2.95E-07 | 1.16E-01 | 1.54E-06 | 3603                            |  |
| 2     | rs10191556 | 2.42E+08 | 2.87E-01        | THAP4     | 4     | rs905955  | 76955454 | 1.71E-01           | USO1     | -             | 2.95E-07 | 1.74E-01 | 1.56E-06 | 3604                            |  |
| 12    | rs7970396  | 59254503 | 6.20E-01        | N/A       | 16    | rs7205180 | 10103085 | 8.12E-01           | GRIN2A   | -             | 2.95E-07 | 9.91E-01 | 5.91E-04 | 3605                            |  |
| 10    | rs1679414  | 4495344  | 2.71E-01        | N/A       | 16    | s12598271 | 81163012 | 3.75E-01           | N/A      | -             | 2.95E-07 | 1.94E-01 | 4.45E-07 | 3606                            |  |
| 8     | rs13254837 | 14217144 | 1.15E-02        | SGCZ      | 8     | rs4917229 | 1.43E+08 | 2.30E-03           | N/A      | -             | 2.96E-07 | 4.36E-01 | 3.81E-04 | 3607                            |  |
| 11    | rs10751026 | 80152305 | 7.48E-01        | N/A       | 11    | rs2406347 | 98028284 | 2.05E-01           | N/A      | -             | 2.96E-07 | 3.44E-01 | 8.40E-04 | 3608                            |  |
| 6     | rs7770797  | 6566961  | 8.95E-01        | LOC285780 | 10    | rs7896883 | 98777344 | 6.22E-01           | SLIT1    | -             | 2.96E-07 | 3.22E-01 | 7.92E-04 | 3609                            |  |
| 6     | rs9348868  | 11476104 | 7.56E-01        | NEDD9     | 1     | s12407360 | 30137216 | 8.43E-01           | N/A      | -             | 2.96E-07 | 3.50E-01 | 3.10E-06 | 3610                            |  |
| 1     | rs1501509  | 1.89E+08 | 3.10E-01        | FAM5C     | 15    | rs3743204 | 53577602 | 8.77E-02           | DYX1C1   | -             | 2.96E-07 | 4.58E-01 | 4.26E-05 | 3611                            |  |
| 5     | rs1422092  | 1.03E+08 | 5.12E-01        | N/A       | 17    | rs748694  | 4496938  | 8.01E-01           | APOX15   | -             | 2.96E-07 | 4.78E-01 | 2.89E-05 | 3612                            |  |
| 1     | rs10900541 | 2.02E+08 | 3.46E-01        | C1orf157  | 3     | rs1838143 | 1.59E+08 | 1.97E-01           | VEPH1    | -             | 2.96E-07 | 4.78E-01 | 2.74E-04 | 3613                            |  |
| 4     | rs2256587  | 29793136 | 8.67E-01        | N/A       | 8     | rs882229  | 62040177 | 7.82E-01           | N/A      | -             | 2.96E-07 | 6.72E-01 | 1.13E-04 | 3614                            |  |
| 3     | rs6665     | 1.56E+08 | 3.92E-02        | MME       | 11    | rs615405  | 59761890 | 7.57E-03           | N/A      | -             | 2.96E-07 | 6.25E-01 | 5.94E-05 | 3615                            |  |
| 5     | rs10055705 | 65978304 | 3.62E-01        | MAST4     | 10    | s11197063 | 84803122 | 9.37E-01           | N/A      | -             | 2.96E-07 | 7.69E-01 | 1.50E-04 | 3616                            |  |
| 8     | rs2453666  | 1.01E+08 | 1.05E-01        | SPAG1     | 11    | s12419676 | 1.07E+08 | 7.73E-01           | N/A      | -             | 2.96E-07 | 2.74E-01 | 4.23E-06 | 3617                            |  |
| 6     | rs1015811  | 28556065 | 8.46E-01        | N/A       | 5     | rs7443875 | 1.45E+08 | 6.07E-01           | N/A      | MHC           | 2.97E-07 | 7.07E-01 | 5.94E-05 | 3618                            |  |
| 2     | rs10519330 | 76539476 | 1.08E-02        | N/A       | 3     | rs1482038 | 14296181 | 5.73E-01           | N/A      | -             | 2.97E-07 | 2.22E-01 | 1.52E-03 | 3619                            |  |
| 3     | rs2633788  | 9589001  | 6.16E-01        | LHFPL4    | 18    | rs8091944 | 5548558  | 4.63E-01           | EPB41L3  | -             | 2.97E-07 | 6.94E-01 | 5.18E-05 | 3620                            |  |
| 2     | rs12694884 | 2.32E+08 | 6.93E-01        | SPATA3    | 3     | rs1485727 | 59869101 | 1.19E-04           | FHIT     | -             | 2.97E-07 | 8.58E-01 | 5.84E-05 | 3621                            |  |
| 10    | rs1679425  | 4482584  | 3.11E-01        | N/A       | 16    | s12598271 | 81163012 | 3.75E-01           | N/A      | -             | 2.97E-07 | 2.42E-01 | 6.55E-07 | 3622                            |  |
| 6     | rs11760199 | 9068727  | 3.40E-01        | N/A       | 20    | rs719563  | 7090997  | 2.75E-01           | N/A      | -             | 2.97E-07 | 4.48E-01 | 1.89E-05 | 3623                            |  |
| 1     | rs2168924  | 2.15E+08 | 8.89E-01        | USH2A     | 2     | s17032053 | 1.06E+08 | 5.49E-01           | N/A      | -             | 2.97E-07 | 9.88E-02 | 2.99E-07 | 3624                            |  |
| 5     | rs12054892 | 57981007 | 6.54E-01        | RAB3C     | 14    | rs7150776 | 92183574 | 8.61E-01           | RIN3     | -             | 2.97E-07 | 4.07E-01 | 1.50E-05 | 3625                            |  |
| 2     | rs2042542  | 2.18E+08 | 1.32E-01        | TNS1      | 12    | rs1245819 | 78166488 | 8.71E-01           | SYT1     | -             | 2.97E-07 | 8.15E-01 | 1.50E-05 | 3626                            |  |
| 2     | rs2042542  | 2.18E+08 | 1.32E-01        | TNS1      | 12    | rs1268463 | 78167625 | 8.71E-01           | SYT1     | -             | 2.97E-07 | 8.15E-01 | 1.50E-05 | 3627                            |  |
| 2     | rs6714466  | 2.25E+08 | 5.02E-01        | DOCK10    | 10    | rs7893153 | 43712417 | 1.24E-02           | N/A      | -             | 2.97E-07 | 6.56E-01 | 9.42E-06 | 3628                            |  |
| 2     | rs7558808  | 2.26E+08 | 5.02E-01        | DOCK10    | 10    | rs7893153 | 43712417 | 1.24E-02           | N/A      | -             | 2.97E-07 | 6.56E-01 | 9.42E-06 | 3629                            |  |
| 2     | rs546613   | 1.74E+08 | 3.86E-01        | N/A       | 22    | rs2154592 | 22277352 | 2.33E-01           | C22orf43 | -             | 2.97E-07 | 7.76E-01 | 1.65E-04 | 3630                            |  |
| 7     | rs6946884  | 15846661 | 9.92E-01        | N/A       | 7     | rs9886124 | 52353870 | 1.30E-01           | N/A      | -             | 2.97E-07 | 8.44E-01 | 1.47E-04 | 3631                            |  |
| 8     | rs7825918  | 49733525 | 2.28E-01        | N/A       | 10    | s11002563 | 79893734 | 3.93E-01           | N/A      | -             | 2.97E-07 | 2.70E-01 | 2.48E-05 | 3632                            |  |
| 4     | rs4859332  | 34705058 | 6.50E-01        | N/A       | 11    | rs3740958 | 36429376 | 2.52E-02           | PRR5L    | -             | 2.97E-07 | 5.06E-01 | 1.20E-05 | 3633                            |  |
| 6     | rs2883136  | 75534691 | 6.95E-01        | N/A       | 11    | rs2919040 | 96085117 | 2.21E-01           | N/A      | -             | 2.97E-07 | 7.22E-01 | 2.93E-05 | 3634                            |  |
| 10    | rs12263663 | 9589327  | 8.11E-01        | N/A       | 14    | s12434022 | 82815943 | 6.02E-01           | N/A      | -             | 2.97E-07 | 4.37E-01 | 4.80E-06 | 3635                            |  |
| 6     | rs11757522 | 1.58E+08 | 6.68E-02        | N/A       | 17    | s10515044 | 49047083 | 5.76E-01           | N/A      | -             | 2.97E-07 | 6.84E-01 | 2.75E-04 | 3636                            |  |
| 1     | rs643841   | 1.11E+08 | 4.70E-01        | N/A       | 7     | rs1859545 | 82007492 | 5.51E-01           | N/A      | -             | 2.97E-07 | 1.95E-01 | 3.65E-03 | 3637                            |  |
| 3     | rs2712353  | 1.15E+08 | 5.03E-01        | ATP6V1A   | 12    | s10841533 | 20496840 | 7.70E-02           | PDE3A    | -             | 2.98E-07 | 5.18E-01 | 6.51E-04 | 3638                            |  |
| 4     | rs1394272  | 1.48E+08 | 5.59E-01        | TTC29     | 15    | rs3825846 | 76287162 | 3.75E-01           | ACSBG1   | -             | 2.98E-07 | 3.01E-01 | 1.11E-05 | 3639                            |  |
| 11    | rs2341431  | 5550669  | 6.63E-01        | OR52B6    | 12    | rs7960093 | 25876110 | 1.12E-01           | N/A      | -             | 2.98E-07 | 3.06E-01 | 2.13E-06 | 3640                            |  |
| 3     | rs745675   | 70788200 | 4.55E-01        | N/A       | 21    | rs1501813 | 17554542 | 4.84E-01           | N/A      | -             | 2.98E-07 | 9.72E-01 | 1.29E-04 | 3641                            |  |
| 3     | rs4128782  | 89320422 | 6.97E-02        | EPHA3     | 7     | rs4731731 | 1.3E+08  | 6.07E-01           | FLJ43663 | -             | 2.98E-07 | 7.60E-01 | 4.98E-05 | 3642                            |  |
| 2     | rs2121661  | 61415162 | 2.63E-01        | USP34     | 8     | rs2726555 | 59947966 | 8.90E-01           | TOX      | -             | 2.98E-07 | 3.57E-01 | 4.25E-04 | 3643                            |  |
| 7     | rs816411   | 56138983 | 5.13E-01        | CHCHD2    | 12    | rs4758963 | 51950415 | 5.01E-01           | ESPL1    | -             | 2.98E-07 | 1.83E-01 | 8.53E-04 | 3644                            |  |
| 4     | rs2218313  | 1.43E+08 | 2.64E-02        | N/A       | 5     | s12717973 | 1.48E+08 | 7.31E-01           | FBXO38   | -             | 2.98E-07 | 5.38E-01 | 2.93E-04 | 3645                            |  |
| 15    | rs12913722 | 35080579 | 7.02E-01        | MEIS2     | 15    | rs4258562 | 93910483 | 5.83E-01           | N/A      | -             | 2.98E-07 | 9.50E-01 | 1.02E-04 | 3646                            |  |
| 4     | rs6824816  | 1.4E+08  | 2.98E-01        | N/A       | 10    | rs4146592 | 98711592 | 5.01E-02           | LCOR     | -             | 2.98E-07 | 9.30E-01 | 7.53E-05 | 3647                            |  |
| 9     | rs1322275  | 1.12E+08 | 9.48E-01        | PALM2     | 12    | rs3912631 | 51249120 | 7.51E-01           | KRT71    | -             | 2.99E-07 | 1.59E-01 | 2.30E-04 | 3648                            |  |
| 4     | rs10003340 | 38385826 | 9.28E-01        | KLF3      | 12    | rs9971766 | 1.3E+08  | 7.24E-01           | GPR133   | -             | 2.99E-07 | 6.42E-01 | 1.92E-05 | 3649                            |  |
| 11    | rs1118137  | 1.3E+08  | 1.37E-01        | N/A       | 12    | rs7962280 | 3189646  | 8.77E-01           | TSPAN9   | -             | 2.99E-07 | 9.52E-01 | 8.35E-05 | 3650                            |  |
| 1     | rs2946534  | 18647370 | 6.65E-01        | N/A       | 7     | rs1005516 | 1.4E+08  | 7.49E-01           | N/A      | -             | 2.99E-07 | 7.04E-01 | 6.75E-04 | 3651                            |  |
| 8     | rs972738   | 72651328 | 8.18E-01        | N/A       | 18    | rs9954856 | 28009142 | 5.44E-01           | MEP1B    | -             | 2.99E-07 | 6.54E-01 | 1.07E-05 | 3652                            |  |
| 8     | rs12549058 | 72654792 | 8.18E-01        | N/A       | 18    | rs9954856 | 28009142 | 5.44E-01           | MEP1B    | -             | 2.99E-07 | 6.88E-01 | 1.22E-05 | 3653                            |  |
| 13    | rs4942644  | 46970415 | 2.76E-01        | N/A       | 19    | rs7252293 | 11225495 | 1.50E-01           | DOCK6    | -             |          |          |          |                                 |  |

















| SNP A |            |          |                 |           | SNP B |           |           |                    |          | Interaction P |          |          | Ranking  | Cluster in top 100 interactions |  |
|-------|------------|----------|-----------------|-----------|-------|-----------|-----------|--------------------|----------|---------------|----------|----------|----------|---------------------------------|--|
| CHR   | SNP        | Location | gle locus P val | Gene      | CHR   | SNP       | Location  | single locus P val | Gene     | MHC region    | Stage 1  | Stage 2  | Combined |                                 |  |
| 5     | rs2116823  | 1.07E+08 | 7.00E-01        | FBXL17    | 16    | rs3760055 | 73048030  | 1.36E-02           | GLG1     | -             | 3.62E-07 | 8.09E-01 | 2.24E-05 | 4591                            |  |
| 5     | rs10059539 | 7881404  | 6.42E-01        | ADCY2     | 7     | s10230113 | 1.5E+08   | 6.10E-02           | GBX1     | -             | 3.62E-07 | 2.75E-01 | 2.47E-06 | 4592                            |  |
| 1     | rs6424949  | 1.83E+08 | 9.93E-01        | C1orf21   | 5     | rs230068  | 13573973  | 4.11E-01           | N/A      | -             | 3.62E-07 | 2.81E-01 | 2.55E-06 | 4593                            |  |
| 1     | rs6424949  | 1.83E+08 | 9.93E-01        | C1orf21   | 5     | rs230071  | 13565539  | 4.11E-01           | N/A      | -             | 3.62E-07 | 2.81E-01 | 2.55E-06 | 4594                            |  |
| 13    | rs11620499 | 92173267 | 7.88E-01        | GPC5      | 18    | s10871616 | 63228905  | 1.89E-01           | N/A      | -             | 3.62E-07 | 5.88E-01 | 2.56E-04 | 4595                            |  |
| 1     | rs1125953  | 1.96E+08 | 9.32E-01        | N/A       | 7     | rs194825  | 1.04E+08  | 9.16E-01           | ORC5L    | -             | 3.62E-07 | 5.43E-01 | 1.28E-05 | 4596                            |  |
| 2     | rs10187555 | 2.19E+08 | 7.58E-01        | IL8RBP    | 7     | s16872525 | 1.08E+08  | 4.60E-01           | N/A      | -             | 3.62E-07 | 5.55E-01 | 1.13E-04 | 4597                            |  |
| 15    | rs12442595 | 55831228 | 7.23E-01        | N/A       | 20    | s10485751 | 11927195  | 8.28E-01           | N/A      | -             | 3.62E-07 | 9.13E-01 | 6.65E-05 | 4598                            |  |
| 8     | rs11783232 | 13848841 | 8.21E-01        | N/A       | 18    | rs919093  | 6463820   | 5.11E-01           | N/A      | -             | 3.62E-07 | 9.73E-01 | 3.00E-04 | 4599                            |  |
| 6     | rs3890820  | 1.01E+08 | 9.04E-01        | N/A       | 11    | rs7928739 | 67590119  | 9.00E-02           | CHKA     | -             | 3.62E-07 | 4.89E-01 | 2.20E-05 | 4600                            |  |
| 7     | rs4074751  | 7006701  | 2.45E-02        | N/A       | 13    | rs9540823 | 33895343  | 4.65E-02           | N/A      | -             | 3.62E-07 | 7.85E-01 | 1.46E-05 | 4601                            |  |
| 1     | rs7522419  | 17906086 | 5.76E-01        | ARHGEF10L | 4     | rs6827740 | 1.2E+08   | 9.89E-01           | SEC24D   | -             | 3.62E-07 | 9.77E-01 | 8.34E-05 | 4602                            |  |
| 11    | rs10833325 | 20415014 | 2.74E-01        | PRMT3     | 14    | s10483304 | 25626745  | 7.37E-01           | N/A      | -             | 3.62E-07 | 6.90E-02 | 5.39E-03 | 4603                            |  |
| 2     | rs7592671  | 1.68E+08 | 9.06E-01        | XIRP2     | 19    | rs889363  | 18622276  | 1.44E-01           | KLHL26   | -             | 3.62E-07 | 3.14E-01 | 3.74E-04 | 4604                            |  |
| 6     | rs394754   | 42767957 | 8.05E-01        | UBR2      | 13    | rs9512551 | 26603697  | 5.38E-01           | USP12    | -             | 3.62E-07 | 5.14E-01 | 9.10E-05 | 4605                            |  |
| 6     | rs394754   | 42767957 | 8.05E-01        | UBR2      | 13    | rs2484111 | 26630970  | 5.38E-01           | USP12    | -             | 3.62E-07 | 6.68E-01 | 1.60E-04 | 4606                            |  |
| 14    | rs10130202 | 35235169 | 6.01E-01        | RALGAP1   | 19    | rs36259   | 8232904   | 7.47E-01           | LASSA    | -             | 3.62E-07 | 9.29E-02 | 5.26E-07 | 4607                            |  |
| 4     | rs7700133  | 1.86E+08 | 1.53E-02        | N/A       | 14    | rs2179932 | 300503224 | 9.59E-01           | STRN3    | -             | 3.62E-07 | 8.28E-01 | 2.86E-04 | 4608                            |  |
| 2     | rs2300439  | 49048206 | 8.49E-02        | FSHR      | 5     | rs4145649 | 1.03E+08  | 3.12E-01           | N/A      | -             | 3.63E-07 | 1.34E-02 | 1.48E-02 | 4609                            |  |
| 5     | rs37181    | 1.16E+08 | 5.66E-01        | COMMD10   | 10    | rs560083  | 84604824  | 4.67E-01           | NRG3     | -             | 3.63E-07 | 7.13E-03 | 1.51E-08 | 4610                            |  |
| 16    | rs4782793  | 82031100 | 9.85E-03        | CDH13     | 16    | rs731258  | 82271433  | 4.87E-01           | CDH13    | -             | 3.63E-07 | 5.36E-01 | 1.99E-04 | 4611                            |  |
| 8     | rs16939382 | 77948002 | 9.53E-01        | ZFH4      | 8     | rs1443930 | 1.09E+08  | 8.89E-01           | RSP02    | -             | 3.63E-07 | 4.76E-01 | 1.10E-05 | 4612                            |  |
| 2     | rs6431850  | 7165870  | 3.51E-01        | N/A       | 5     | s10075633 | 28422872  | 7.48E-01           | N/A      | -             | 3.63E-07 | 7.08E-02 | 2.60E-03 | 4613                            |  |
| 12    | rs1870214  | 50884762 | 1.09E-01        | LOC283404 | 22    | rs738416  | 48482509  | 5.65E-01           | N/A      | -             | 3.63E-07 | 2.01E-02 | 1.76E-07 | 4614                            |  |
| 12    | rs10743315 | 19360345 | 6.05E-01        | PLEKHA5   | 21    | rs7279115 | 41205602  | 7.41E-01           | N/A      | -             | 3.63E-07 | 3.05E-01 | 4.66E-03 | 4615                            |  |
| 6     | rs9285499  | 1.44E+08 | 5.74E-02        | AIG1      | 20    | rs911168  | 58430478  | 6.24E-01           | N/A      | -             | 3.63E-07 | 1.44E-01 | 4.53E-03 | 4616                            |  |
| 1     | rs4926749  | 48975936 | 8.86E-01        | AGBL4     | 7     | s1176158  | 1.51E+08  | 7.66E-01           | WDR86    | -             | 3.63E-07 | 7.78E-01 | 8.53E-05 | 4617                            |  |
| 6     | rs4320355  | 25570803 | 1.26E-01        | N/A       | 11    | s1122551E | 1.02E+08  | 6.94E-01           | N/A      | MHC           | 3.63E-07 | 3.68E-01 | 1.95E-04 | 4618                            |  |
| 7     | rs12113404 | 26189819 | 2.30E-01        | NFE2L3    | 11    | rs7950929 | 97023895  | 8.03E-01           | N/A      | -             | 3.64E-07 | 8.48E-01 | 7.81E-05 | 4619                            |  |
| 1     | rs1340592  | 67793691 | 4.96E-01        | N/A       | 12    | rs716553  | 46927670  | 5.80E-01           | N/A      | -             | 3.64E-07 | N/A      | N/A      | 4620                            |  |
| 1     | rs4655733  | 67798226 | 4.96E-01        | N/A       | 12    | rs716553  | 46927670  | 5.80E-01           | N/A      | -             | 3.64E-07 | N/A      | N/A      | 4621                            |  |
| 1     | rs6662607  | 67794090 | 4.96E-01        | N/A       | 12    | rs716553  | 46927670  | 5.80E-01           | N/A      | -             | 3.64E-07 | N/A      | N/A      | 4622                            |  |
| 1     | rs6693292  | 67795756 | 4.96E-01        | N/A       | 12    | rs716553  | 46927670  | 5.80E-01           | N/A      | -             | 3.64E-07 | N/A      | N/A      | 4623                            |  |
| 10    | rs10741093 | 25854593 | 3.28E-01        | GPR158    | 14    | s12897185 | 37572030  | 5.97E-01           | N/A      | -             | 3.64E-07 | N/A      | N/A      | 4624                            |  |
| 4     | rs10517216 | 48150691 | 8.49E-01        | N/A       | 16    | rs7192553 | 81674884  | 9.75E-02           | CDH13    | -             | 3.64E-07 | 1.86E-01 | 1.72E-06 | 4625                            |  |
| 9     | rs1332173  | 25490238 | 8.01E-01        | N/A       | 16    | s12127065 | 7141423   | 3.49E-01           | RBFOX1   | -             | 3.64E-07 | 4.24E-04 | 1.76E-09 | 4626                            |  |
| 8     | rs1467300  | 61163130 | 8.96E-01        | N/A       | 20    | rs2426472 | 51290219  | 3.51E-01           | N/A      | -             | 3.64E-07 | 2.40E-02 | 2.94E-07 | 4627                            |  |
| 3     | rs6785998  | 61593709 | 7.64E-01        | PTPRG     | 20    | rs1530089 | 58423289  | 7.30E-01           | N/A      | -             | 3.64E-07 | 6.36E-02 | 1.81E-07 | 4628                            |  |
| 4     | rs9993173  | 93564163 | 7.92E-01        | GRID2     | 20    | rs6044641 | 17058620  | 4.41E-01           | N/A      | -             | 3.64E-07 | 3.30E-01 | 4.47E-06 | 4629                            |  |
| 4     | rs9993173  | 93564163 | 7.92E-01        | GRID2     | 20    | rs6135981 | 17059709  | 4.41E-01           | N/A      | -             | 3.64E-07 | 3.30E-01 | 4.47E-06 | 4630                            |  |
| 3     | rs7626487  | 1.63E+08 | 6.10E-01        | N/A       | 7     | s10229388 | 43210547  | 3.33E-01           | HECW1    | -             | 3.64E-07 | 9.46E-02 | 4.26E-06 | 4631                            |  |
| 13    | rs982790   | 90029774 | 3.82E-01        | N/A       | 13    | rs816960  | 1.07E+08  | 2.38E-01           | FAM155A  | -             | 3.64E-07 | 4.05E-03 | 2.78E-08 | 4632                            |  |
| 7     | rs10280848 | 67742124 | 8.09E-01        | N/A       | 10    | rs7923691 | 26281462  | 2.98E-01           | MYO3A    | -             | 3.64E-07 | 2.54E-01 | 7.17E-04 | 4633                            |  |
| 3     | rs1284726  | 1.04E+08 | 2.34E-01        | N/A       | 13    | rs9534981 | 47653682  | 6.92E-01           | N/A      | -             | 3.65E-07 | 2.05E-01 | 1.38E-06 | 4634                            |  |
| 3     | rs1284726  | 1.04E+08 | 2.34E-01        | N/A       | 13    | rs7998964 | 47686991  | 6.92E-01           | ITM2B    | -             | 3.65E-07 | 2.27E-01 | 1.59E-06 | 4635                            |  |
| 3     | rs1284726  | 1.04E+08 | 2.34E-01        | N/A       | 13    | rs9534995 | 47684077  | 6.92E-01           | N/A      | -             | 3.65E-07 | 2.27E-01 | 1.59E-06 | 4636                            |  |
| 13    | rs1323949  | 34329868 | 4.15E-01        | N/A       | 14    | s10483521 | 41735682  | 9.86E-01           | LRFN5    | -             | 3.65E-07 | 4.39E-01 | 1.37E-04 | 4637                            |  |
| 15    | rs11071185 | 53482122 | 5.92E-01        | CCPG1     | 20    | rs720489  | 11897114  | 4.17E-01           | N/A      | -             | 3.65E-07 | 5.70E-01 | 5.29E-04 | 4638                            |  |
| 15    | rs8037097  | 46891401 | 1.26E-01        | SHC4      | 18    | rs2847325 | 693442    | 7.20E-01           | YES1     | -             | 3.65E-07 | 5.71E-01 | 6.32E-04 | 4639                            |  |
| 2     | rs2861680  | 79006430 | 1.64E-01        | N/A       | 11    | s1122871E | 56187792  | 3.86E-01           | OR8U8    | -             | 3.65E-07 | 6.54E-01 | 1.46E-04 | 4640                            |  |
| 5     | rs17577590 | 1.78E+08 | 8.68E-01        | AGXT2L2   | 10    | s11176653 | 1.18E+08  | 9.76E-01           | C10orf96 | -             | 3.65E-07 | 8.72E-01 | 8.74E-05 | 4641                            |  |
| 2     | rs883423   | 1.61E+08 | 5.32E-01        | N/A       | 3     | s11129573 | 34040753  | 7.33E-01           | N/A      | -             | 3.65E-07 | 9.80E-01 | 3.10E-04 | 4642                            |  |
| 7     | rs2188324  | 88162442 | 3.41E-01        | N/A       | 7     | rs7997640 | 29642080  | 5.24E-01           | N/A      | -             | 3.65E-07 | 1.45E-01 | 5.25E-07 | 4643                            |  |
| 6     | rs6923877  | 1.61E+08 | 5.49E-01        | LPA       | 7     | rs7798471 | 6711482   | 4.88E-01           | ZNF12    | -             | 3.65E-07 | 1.51E-01 | 1.05E-06 | 4644                            |  |
| 1     | rs2026598  | 82722231 | 1.00E-01        | N/A       | 3     | s16854200 | 1.71E+08  | 7.91E-01           | MECOM    | -             | 3.65E-07 | 2.89E-01 | 1.35E-03 | 4645                            |  |
| 6     | rs2328537  | 1.44E+08 | 7.35E-01        | PLAGL1    | 8     | s10954922 | 33649641  | 2.34E-02           | N/A      | -             | 3.65E-07 | 4.19E-02 | 1.37E-07 | 4646                            |  |
| 4     | rs2165387  | 80710844 | 6.07E-02        | N/A       | 4     | s1705642E | 1.72E+08  | 7.86E-01           | N/A      | -             | 3.65E-07 | 6.76E-01 | 2.13E-04 | 4647                            |  |
| 2     | rs1108890  | 2.37E+08 | 2.96E-01        | IQCA1     | 9     | s10818702 | 1.24E+08  | 2.70E-01           | OR1J1    | -             | 3.65E-07 | 9.20E-01 | 8.16E-05 | 4648                            |  |
| 1     | rs7586860  | 1.85E+08 | 2.23E-01        | ZNF804A   | 8     | rs722311  | 18541896  | 2.56E-01           | PSD3     | -             | 3.66E-07 | 5.59E-01 | 6.32E-05 | 4649                            |  |
| 1     | rs16837337 | 35655246 | 8.61E-01        | ZMYM4     | 17    | rs2091763 | 34483768  | 5.34E-01           | PLXDC1   | -             | 3.66E-07 | 6.91E-01 | 1.15E-05 | 4650                            |  |
| 1     | rs16837337 | 35655246 | 8.61E-01        | ZMYM4     | 17    | rs7344077 | 34488719  | 5.34E-01           | PLXDC1   | -             | 3.66E-07 | 6.91E-01 | 1.15E-05 | 4651                            |  |
| 2     | rs1477032  | 2.03E+08 | 4.85E-02        | N/A       | 17    | rs7344763 | 33164998  | 3.48E-01           | HNF1B    | -             | 3.66E-07 | 8.53E-01 | 5.32E-05 | 4652                            |  |
| 10    | rs10821624 | 61407293 | 3.85E-02        | C10orf40  | 10    | rs2817694 | 98856512  | 3.60E-01           | SLIT1    | -             | 3.66E-07 | 4.56E-02 | 8.19E-03 | 4653                            |  |
| 10    | rs3862863  | 61411255 | 3.85E-02        | N/A       | 10    | rs2817694 | 98856512  | 3.60E-01           | SLIT1    | -             | 3.66E-07 | 4.56E-02 | 8.19E-03 | 4654                            |  |
| 3     | rs10513754 | 1.79E+08 | 1.99E-01        | N/A       | 21    | s11088242 | 33506414  | 9.85E-01           | IFNAR2   | -             | 3.66E-07 | 6.93E-01 | 1.55E-05 | 4655                            |  |
| 11    | rs4937554  | 1.3E+08  | 6.14E-01        | N/A       | 17    | s16956022 | 682800    | 6.15E-01           | NXN      | -             | 3.66E-07 | 3.11E-01 | 1.50E-05 | 4656                            |  |
| 2     | rs3087386  | 99421938 | 9.51E-01        | REV1      | 5     | rs3776081 | 1.5E+08   | 6.89E-01           | CDX1     | -             | 3.66E-07 | N/A      | N/A      | 4657                            |  |
| 1     | rs10494417 | 1.63E+08 | 2.35E-01        | N/A       | 12    | s10784498 | 38983701  | 7.50E-01           | LRRK2    | -             | 3.66E-07 | 6.89E-01 | 1.86E-05 | 4658                            |  |
| 5     | rs4921132  | 1.6E+08  | 8.00E-02        | C1QTNF2   | 7     | rs5012030 | 1.42E+08  | 5.59E-01           | MOXD2    | -             | 3.66E-07 | 8.82E-01 | 9.69E-04 | 4659                            |  |
| 7     | rs12672847 | 9346003  | 4.11E-01        | N/A       | 9     | rs4878845 | 38673660  | 9.08E-01           | N/A      | -             | 3.66E-07 | N/A      | N/A      | 4660                            |  |
| 6     | rs2764075  | 7300517  | 1.24E-01        | N/A       | 21    | rs641698  | 23324326  | 1.25E-01           | N/A      | -             | 3.66E-07 | 1.80E-01 | 4.04E-06 | 4661                            |  |
| 3     | rs4128691  | 72432553 | 5.85E-01        | N/A       | 11    | rs523157  | 95574019  | 4.22E-01           | MAML2    | -             | 3.66E-07 | 5.95E-01 | 1.58E-05 | 4662                            |  |
| 6     | rs10484284 | 1.3E+08  | 6.91E-          |           |       |           |           |                    |          |               |          |          |          |                                 |  |

| SNP A |            |          |                 |          | SNP B |            |          |                      |           | Interaction P |          |          | Ranking  | Cluster in top 100 interactions |  |
|-------|------------|----------|-----------------|----------|-------|------------|----------|----------------------|-----------|---------------|----------|----------|----------|---------------------------------|--|
| CHR   | SNP        | Location | gle locus P val | Gene     | CHR   | SNP        | Location | Single locus P value | Gene      | MHC region    | Stage 1  | Stage 2  | Combined |                                 |  |
| 1     | rs10924366 | 2.44E+08 | 2.27E-01        | SMYD3    | 5     | rs12188525 | 16582754 | 6.47E-01             | FAM134B   | -             | 3.69E-07 | 3.74E-01 | 3.39E-05 | 4703                            |  |
| 10    | rs2163673  | 90477499 | 7.09E-01        | LIPK     | 21    | rs2837686  | 40828369 | 2.51E-01             | DSCAM     | -             | 3.69E-07 | 6.90E-02 | 1.89E-07 | 4704                            |  |
| 1     | rs970741   | 1.68E+08 | 6.98E-01        | F5       | 1     | rs284113   | 1.87E+08 | 1.46E-01             | N/A       | -             | 3.69E-07 | 8.22E-01 | 2.35E-05 | 4705                            |  |
| 7     | rs6978212  | 8499369  | 6.00E-01        | NXPH1    | 18    | rs11564338 | 23972174 | 2.55E-01             | CDH2      | -             | 3.69E-07 | 2.46E-01 | 1.52E-03 | 4706                            |  |
| 7     | rs6978212  | 8499369  | 6.00E-01        | NXPH1    | 18    | rs8094439  | 23966605 | 2.55E-01             | CDH2      | -             | 3.69E-07 | 2.46E-01 | 1.52E-03 | 4707                            |  |
| 6     | rs7769927  | 44409085 | 7.15E-01        | SPATS1   | 8     | rs510395   | 20854474 | 5.80E-01             | N/A       | -             | 3.69E-07 | 4.67E-01 | 3.75E-04 | 4708                            |  |
| 4     | rs6845251  | 1.84E+08 | 1.20E-01        | WWC2     | 15    | rs6495163  | 73252104 | 3.89E-01             | N/A       | -             | 3.69E-07 | 7.77E-01 | 1.80E-04 | 4709                            |  |
| 2     | rs2600660  | 61403104 | 3.92E-01        | USP34    | 8     | rs2726555  | 59947966 | 8.90E-01             | TOX       | -             | 3.69E-07 | 3.62E-01 | 4.64E-04 | 4710                            |  |
| 3     | rs2033857  | 1.66E+08 | 5.05E-01        | N/A      | 8     | rs10107021 | 1.15E+08 | 7.82E-01             | N/A       | -             | 3.69E-07 | 9.71E-01 | 2.84E-05 | 4711                            |  |
| 5     | rs1158196  | 58017591 | 5.70E-01        | RAB3C    | 13    | rs11621843 | 92185877 | 4.54E-01             | RIN3      | -             | 3.69E-07 | 4.54E-01 | 1.36E-05 | 4712                            |  |
| 5     | rs889268   | 37917929 | 2.47E-01        | N/A      | 12    | rs4763602  | 11020700 | 5.42E-01             | PRH1      | -             | 3.69E-07 | 6.77E-01 | 1.99E-04 | 4713                            |  |
| 11    | rs870066   | 78487703 | 3.88E-01        | ODZ4     | 11    | rs3758770  | 1.28E+08 | 2.98E-01             | FLI1      | -             | 3.69E-07 | 3.10E-01 | 3.09E-04 | 4714                            |  |
| 11    | rs870066   | 78487703 | 3.88E-01        | ODZ4     | 11    | rs7951996  | 1.28E+08 | 2.98E-01             | FLI1      | -             | 3.69E-07 | 3.10E-01 | 3.09E-04 | 4715                            |  |
| 14    | rs2152402  | 32634017 | 1.73E-01        | NPAS3    | 15    | rs1346037  | 59925203 | 7.83E-01             | VPS13C    | -             | 3.69E-07 | 3.36E-01 | 4.77E-04 | 4716                            |  |
| 4     | rs2044844  | 42551396 | 5.93E-01        | N/A      | 10    | rs12411348 | 1.25E+08 | 2.74E-01             | HMX3      | -             | 3.69E-07 | 3.59E-01 | 3.83E-06 | 4717                            |  |
| 4     | rs9985652  | 42553210 | 5.93E-01        | N/A      | 10    | rs12411348 | 1.25E+08 | 2.74E-01             | HMX3      | -             | 3.69E-07 | 3.59E-01 | 3.83E-06 | 4718                            |  |
| 5     | rs4921132  | 1.6E+08  | 8.00E-02        | C1QTNF2  | 7     | rs4329193  | 1.42E+08 | 5.55E-01             | MOXD2     | -             | 3.69E-07 | 9.01E-01 | 9.63E-04 | 4719                            |  |
| 1     | rs3128678  | 4925039  | 7.99E-01        | N/A      | 13    | rs1322812  | 36877365 | 7.17E-01             | N/A       | -             | 3.69E-07 | 1.04E-02 | 2.16E-02 | 4720                            |  |
| 3     | rs13088837 | 63434165 | 2.58E-01        | SYNPR    | 10    | rs1983127  | 70659907 | 6.72E-01             | HKDC1     | -             | 3.69E-07 | 1.77E-01 | 1.28E-06 | 4721                            |  |
| 1     | rs1451915  | 1.94E+08 | 7.67E-01        | N/A      | 8     | rs7838977  | 1.4E+08  | 4.40E-01             | N/A       | -             | 3.69E-07 | 5.46E-01 | 3.52E-04 | 4722                            |  |
| 3     | rs4857176  | 97356654 | 2.54E-01        | N/A      | 7     | rs12703325 | 1.54E+08 | 2.15E-01             | DPP6      | -             | 3.69E-07 | 7.88E-01 | 2.23E-04 | 4723                            |  |
| 1     | rs17019602 | 1.08E+08 | 5.64E-01        | VAV3     | 9     | rs11243900 | 1.35E+08 | 5.82E-02             | C9orf98   | -             | 3.70E-07 | 3.10E-01 | 1.61E-05 | 4724                            |  |
| 8     | rs7833351  | 95251354 | 6.61E-01        | CDH17    | 17    | rs2948549  | 22937916 | 2.93E-01             | KSR1      | -             | 3.70E-07 | 5.22E-01 | 1.57E-05 | 4725                            |  |
| 15    | rs892775   | 31611822 | 1.40E-01        | RYR3     | 17    | rs9908987  | 60878953 | 1.38E-01             | N/A       | -             | 3.70E-07 | 1.71E-01 | 2.81E-06 | 4726                            |  |
| 6     | rs1013147  | 57232840 | 9.75E-01        | N/A      | 8     | rs6991834  | 3115506  | 1.57E-01             | CSMD1     | -             | 3.70E-07 | 6.83E-01 | 2.83E-05 | 4727                            |  |
| 6     | rs1013147  | 57232840 | 9.75E-01        | N/A      | 8     | rs7010127  | 3115425  | 1.57E-01             | CSMD1     | -             | 3.70E-07 | 6.83E-01 | 2.83E-05 | 4728                            |  |
| 1     | rs2035015  | 1.08E+08 | 4.76E-01        | VAV3     | 4     | rs6850861  | 1.78E+08 | 8.83E-01             | NEIL3     | -             | 3.70E-07 | 3.34E-02 | 4.80E-03 | 4729                            |  |
| 4     | rs6814124  | 1.51E+08 | 4.99E-01        | N/A      | 9     | rs1445206  | 9154473  | 9.39E-01             | PTPRD     | -             | 3.70E-07 | 9.63E-01 | 1.26E-04 | 4730                            |  |
| 1     | rs7543486  | 14170601 | 6.45E-01        | N/A      | 10    | rs1923268  | 33414814 | 9.72E-01             | N/A       | -             | 3.70E-07 | 2.65E-01 | 2.67E-03 | 4731                            |  |
| 5     | rs708669   | 12454141 | 7.55E-01        | N/A      | 7     | rs217581   | 14893196 | 8.73E-01             | N/A       | -             | 3.70E-07 | 3.05E-01 | 7.20E-04 | 4732                            |  |
| 5     | rs12654191 | 67529177 | 5.99E-01        | N/A      | 10    | rs2842149  | 1.28E+08 | 9.48E-01             | N/A       | -             | 3.70E-07 | 9.38E-02 | 1.19E-06 | 4733                            |  |
| 4     | rs2583194  | 1.78E+08 | 2.23E-02        | N/A      | 20    | rs932905   | 48229538 | 2.71E-01             | CEBPB     | -             | 3.70E-07 | 3.25E-01 | 2.59E-05 | 4734                            |  |
| 2     | rs4477859  | 1.6E+08  | 9.69E-01        | 7-Mar    | 18    | rs7228959  | 7066464  | 6.14E-01             | LAMA1     | -             | 3.70E-07 | 8.67E-01 | 1.05E-04 | 4735                            |  |
| 5     | rs1600178  | 51894999 | 9.08E-01        | N/A      | 11    | rs10792712 | 83440566 | 3.08E-02             | DLG2      | -             | 3.71E-07 | 1.41E-01 | 5.79E-06 | 4736                            |  |
| 2     | rs11691626 | 2.36E+08 | 2.24E-01        | N/A      | 14    | rs4399485  | 1.05E+08 | 8.53E-01             | JAG2      | -             | 3.71E-07 | 7.04E-01 | 2.42E-04 | 4737                            |  |
| 6     | rs3130534  | 31317024 | 3.50E-01        | N/A      | 6     | rs1131896  | 31487094 | 3.40E-01             | MICA      | MHC           | 3.71E-07 | 9.18E-01 | 1.28E-04 | 4738                            |  |
| 7     | rs4721998  | 21228763 | 7.69E-01        | N/A      | 12    | rs1035065  | 5666310  | 1.70E-01             | ANO2      | -             | 3.71E-07 | 8.87E-02 | 3.75E-03 | 4739                            |  |
| 3     | rs7613069  | 10600996 | 5.88E-01        | N/A      | 14    | rs10872983 | 21691822 | 1.07E-01             | N/A       | -             | 3.71E-07 | 6.43E-01 | 8.62E-04 | 4740                            |  |
| 1     | rs10797006 | 1.57E+08 | 6.62E-01        | CD1C     | 18    | rs1940435  | 407559   | 6.83E-01             | COLEC12   | -             | 3.71E-07 | 9.03E-01 | 6.78E-05 | 4741                            |  |
| 1     | rs6588480  | 53750707 | 4.14E-01        | GLIS1    | 5     | rs4958217  | 1.34E+08 | 7.30E-01             | TCF7      | -             | 3.71E-07 | 9.44E-01 | 8.82E-05 | 4742                            |  |
| 1     | rs6588480  | 53750707 | 4.14E-01        | GLIS1    | 5     | rs30489    | 1.34E+08 | 7.30E-01             | TCF7      | -             | 3.71E-07 | 9.72E-01 | 1.19E-04 | 4743                            |  |
| 12    | rs11612851 | 1.29E+08 | 3.15E-01        | TMEM132D | 16    | rs4782474  | 87685048 | 1.76E-01             | ACSF3     | -             | 3.71E-07 | 2.53E-01 | 1.16E-06 | 4744                            |  |
| 12    | rs7967165  | 950268   | 1.40E-01        | N/A      | 17    | rs9892829  | 11661322 | 5.30E-01             | DN/AH9    | -             | 3.71E-07 | 7.09E-02 | 2.25E-03 | 4745                            |  |
| 9     | rs7034150  | 73262661 | 7.36E-01        | N/A      | 16    | rs231921   | 20569262 | 1.79E-02             | ACSM1     | -             | 3.71E-07 | 8.57E-01 | 1.71E-04 | 4746                            |  |
| 4     | rs1458038  | 81383747 | 6.26E-01        | N/A      | 5     | rs1046295  | 1.65E+08 | 2.37E-01             | N/A       | -             | 3.71E-07 | 4.43E-01 | 9.33E-04 | 4747                            |  |
| 5     | rs2560412  | 5202621  | 4.31E-01        | ADAMTS16 | 12    | rs825959   | 89248606 | 9.78E-02             | N/A       | -             | 3.72E-07 | 1.87E-01 | 1.69E-03 | 4748                            |  |
| 1     | rs1702002  | 54833136 | 7.12E-01        | ACOT11   | 2     | rs1521880  | 2.03E+08 | 4.46E-01             | N/A       | -             | 3.72E-07 | 2.64E-01 | 3.14E-05 | 4749                            |  |
| 6     | rs6919094  | 10298044 | 4.47E-01        | N/A      | 19    | rs321907   | 57480101 | 2.91E-02             | ZNF480    | -             | 3.72E-07 | 9.59E-01 | 5.15E-05 | 4750                            |  |
| 2     | rs2029771  | 2.38E+08 | 2.22E-02        | LRRFIP1  | 14    | rs4254262  | 1.04E+08 | 8.90E-01             | N/A       | -             | 3.72E-07 | 2.71E-01 | 6.69E-04 | 4751                            |  |
| 2     | rs896637   | 2.09E+08 | 5.59E-01        | N/A      | 7     | rs2214244  | 20527828 | 1.05E-01             | N/A       | -             | 3.72E-07 | 4.05E-01 | 7.83E-04 | 4752                            |  |
| 14    | rs894039   | 1.05E+08 | 1.30E-01        | CDC4A    | 22    | rs5749340  | 31136331 | 1.29E-01             | BPIL2     | -             | 3.72E-07 | 4.10E-01 | 2.42E-05 | 4753                            |  |
| 11    | rs2298725  | 1.2E+08  | 2.28E-01        | GRIK4    | 19    | rs10426038 | 34046581 | 2.40E-01             | N/A       | -             | 3.72E-07 | 6.50E-01 | 2.66E-05 | 4754                            |  |
| 1     | rs169453   | 75337635 | 3.44E-01        | N/A      | 5     | rs828718   | 1.62E+08 | 5.73E-01             | N/A       | -             | 3.72E-07 | 9.08E-01 | 3.92E-04 | 4755                            |  |
| 3     | rs1220472  | 1.52E+08 | 4.00E-01        | N/A      | 8     | rs1199452  | 1.26E+08 | 5.93E-01             | MTSS1     | -             | 3.72E-07 | 2.10E-01 | 1.21E-06 | 4756                            |  |
| 3     | rs1220472  | 1.52E+08 | 4.00E-01        | N/A      | 8     | rs1199530  | 1.26E+08 | 5.93E-01             | MTSS1     | -             | 3.72E-07 | 2.10E-01 | 1.21E-06 | 4757                            |  |
| 3     | rs1220472  | 1.52E+08 | 4.00E-01        | N/A      | 8     | rs4870911  | 1.26E+08 | 5.93E-01             | MTSS1     | -             | 3.72E-07 | 2.10E-01 | 1.21E-06 | 4758                            |  |
| 3     | rs1387089  | 1915922  | 6.17E-01        | N/A      | 10    | rs242965   | 1.19E+08 | 2.93E-02             | EMX2OS    | -             | 3.72E-07 | 9.49E-01 | 1.53E-04 | 4759                            |  |
| 3     | rs4244713  | 1.01E+08 | 5.69E-01        | FILIP1L  | 9     | rs4877434  | 90080934 | 9.39E-01             | N/A       | -             | 3.72E-07 | 2.51E-01 | 4.52E-03 | 4760                            |  |
| 6     | rs10498874 | 71513774 | 6.64E-02        | SMAP1    | 17    | rs766304   | 64102446 | 9.81E-01             | FAM20A    | -             | 3.72E-07 | 6.19E-01 | 2.20E-05 | 4761                            |  |
| 11    | rs1790158  | 74858897 | 1.10E-01        | GPDP5    | 16    | rs7191962  | 79763243 | 7.80E-01             | PKD1L2    | -             | 3.72E-07 | 7.98E-01 | 1.54E-04 | 4762                            |  |
| 2     | rs7579812  | 1.17E+08 | 7.65E-01        | N/A      | 15    | rs9920389  | 93832564 | 9.64E-01             | LOC145820 | -             | 3.72E-07 | 7.99E-01 | 3.35E-04 | 4763                            |  |
| 1     | rs1416531  | 2.15E+08 | 4.59E-02        | ESRRG    | 2     | rs6737361  | 1.41E+08 | 6.40E-01             | LRP1B     | -             | 3.72E-07 | 8.10E-01 | 2.86E-04 | 4764                            |  |
| 1     | rs1781030  | 2.06E+08 | 4.10E-02        | PLXNA2   | 5     | rs4631227  | 1.33E+08 | 5.10E-02             | N/A       | -             | 3.72E-07 | 9.64E-01 | 1.36E-04 | 4765                            |  |
| 6     | rs6935416  | 5879999  | 9.34E-01        | N/A      | 2     | rs4668879  | 15221205 | 8.99E-01             | NBAS      | -             | 3.72E-07 | 3.76E-01 | 1.53E-03 | 4766                            |  |
| 2     | rs13407916 | 1.09E+08 | 2.11E-01        | SH3RF3   | 22    | rs228942   | 35854565 | 1.59E-02             | IL2RB     | -             | 3.72E-07 | 8.69E-01 | 1.44E-04 | 4767                            |  |
| 2     | rs1595066  | 2.12E+08 | 3.76E-01        | ERBB4    | 3     | rs4677287  | 73598809 | 1.07E-01             | PDZRN3    | -             | 3.72E-07 | 1.82E-01 | 9.48E-07 | 4768                            |  |
| 2     | rs10210863 | 76802609 | 1.17E-01        | N/A      | 12    | rs2468343  | 1.04E+08 | 3.60E-01             | SLC41A2   | -             | 3.72E-07 | 1.89E-01 | 2.17E-06 | 4769                            |  |
| 2     | rs2592813  | 1.7E+08  | 6.04E-01        | PPIG     | 7     | rs2158546  | 49596217 | 9.09E-01             | N/A       | -             | 3.72E-07 | 4.45E-01 | 3.34E-06 | 4770                            |  |
| 1     | rs600734   | 75457991 | 2.70E-01        | SLC44A5  | 5     | rs1007954  | 1.62E+08 | 6.50E-01             | N/A       | -             | 3.72E-07 | 7.64E-01 | 3.69E-05 | 4771                            |  |
| 12    | rs12812221 | 55605603 | 5.43E-01        | SDR9C7   | 15    | rs10852213 | 25475258 | 1.32E-01             | N/A       | -             | 3.73E-07 | 4.03E-01 | 5.82E-06 | 4772                            |  |
| 3     | rs1464623  | 1.67E+08 | 5.46E-01        | N/A      | 20    | rs11696207 | 54565194 | 1.95E-01             | N/A       | -             | 3.73E-07 | 2.66E-01 | 1.96E-06 | 4773                            |  |
| 5     | rs9885155  | 1.72E+08 | 2.52E-01        | ERGIC1   | 19    | rs3852916  | 16253163 | 4.41E-01             | N/A       | -             |          |          |          |                                 |  |













| SNP A |            |          |                 |          | SNP B |            |          |                    |           | Interaction P |          |            | Ranking  | Cluster in top 100 interactions |  |
|-------|------------|----------|-----------------|----------|-------|------------|----------|--------------------|-----------|---------------|----------|------------|----------|---------------------------------|--|
| CHR   | SNP        | Location | gle locus P val | Gene     | CHR   | SNP        | Location | single locus P val | Gene      | MHC region    | Stage 1  | Stage 2    | Combined |                                 |  |
| 1     | rs1749778  | 58236351 | 6.32E-02        | DAB1     | 8     | rs4734606  | 1.03E+08 | 3.01E-01           | NCALD     | -             | 4.19E-07 | 1.26E-01   | 9.52E-04 | 5487                            |  |
| 14    | rs989909   | 74157997 | 7.17E-01        | LTBP2    | 22    | rs3747152  | 29850338 | 4.54E-01           | INPP5J    | -             | 4.19E-07 | 2.08E-01   | 3.09E-06 | 5488                            |  |
| 5     | rs1158196  | 58017591 | 5.70E-01        | RAB3C    | 12    | rs3829948  | 92186579 | 5.37E-01           | RIN3      | -             | 4.19E-07 | 3.40E-01   | 8.45E-06 | 5489                            |  |
| 2     | rs17442753 | 19509571 | 6.90E-01        | N/A      | 12    | rs1683163  | 25124885 | 2.18E-01           | LRMP      | -             | 4.19E-07 | 6.54E-03   | 1.79E-08 | 5490                            |  |
| 6     | rs2273006  | 34959112 | 4.80E-01        | ANKS1A   | 9     | rs287572   | 31994713 | 1.35E-01           | N/A       | MHC           | 4.19E-07 | 1.49E-01   | 1.14E-03 | 5491                            |  |
| 6     | rs2273006  | 34959112 | 4.80E-01        | ANKS1A   | 9     | rs287573   | 31994571 | 1.35E-01           | N/A       | MHC           | 4.19E-07 | 1.49E-01   | 1.14E-03 | 5492                            |  |
| 6     | rs2273006  | 34959112 | 4.80E-01        | ANKS1A   | 9     | rs407791   | 32012207 | 1.35E-01           | N/A       | MHC           | 4.19E-07 | 1.49E-01   | 1.14E-03 | 5493                            |  |
| 6     | rs2273006  | 34959112 | 4.80E-01        | ANKS1A   | 9     | rs453809   | 32006697 | 1.35E-01           | N/A       | MHC           | 4.19E-07 | N/A        | N/A      | 5494                            |  |
| 7     | rs6945759  | 1.58E+08 | 2.35E-01        | PTPRN2   | 11    | rs10769176 | 45939961 | 7.97E-01           | PHF21A    | -             | 4.20E-07 | N/A        | N/A      | 5495                            |  |
| 1     | rs1886394  | 1.55E+08 | 4.87E-01        | N/A      | 20    | rs6087095  | 9923888  | 5.53E-01           | N/A       | -             | 4.20E-07 | 4.71E-01   | 2.23E-03 | 5496                            |  |
| 5     | rs11748629 | 88832536 | 2.26E-01        | N/A      | 8     | rs4875820  | 2354297  | 1.95E-01           | N/A       | -             | 4.20E-07 | 5.07E-01   | 2.11E-04 | 5497                            |  |
| 2     | rs10165036 | 5634870  | 7.59E-01        | N/A      | 10    | rs1226182  | 79847770 | 1.17E-01           | N/A       | -             | 4.20E-07 | 7.14E-01   | 8.95E-05 | 5498                            |  |
| 2     | rs6433791  | 1.8E+08  | 8.19E-01        | N/A      | 18    | rs2617939  | 23552981 | 7.21E-01           | N/A       | -             | 4.20E-07 | 4.86E-01   | 6.48E-04 | 5499                            |  |
| 8     | rs4237068  | 21266056 | 4.28E-01        | N/A      | 11    | rs922774   | 1.09E+08 | 2.56E-01           | N/A       | -             | 4.20E-07 | 9.42E-01   | 1.25E-04 | 5500                            |  |
| 5     | rs4916818  | 90074285 | 8.68E-01        | GPR98    | 17    | rs10491216 | 3267156  | 7.29E-01           | OR1E1     | -             | 4.20E-07 | 6.56E-01   | 1.27E-06 | 5502                            |  |
| 7     | rs6979066  | 82260873 | 1.50E-01        | PCLO     | 16    | rs1861315  | 50859323 | 5.32E-01           | N/A       | -             | 4.20E-07 | 7.10E-03   | 1.08E-08 | 5503                            |  |
| 4     | rs12648158 | 1.89E+08 | 6.61E-01        | N/A      | 8     | rs13250448 | 10475278 | 3.30E-01           | N/A       | -             | 4.20E-07 | 7.70E-01   | 7.69E-05 | 5501                            |  |
| 9     | rs1360523  | 25489528 | 7.55E-01        | N/A      | 16    | rs2127065  | 7141423  | 3.49E-01           | RBFOX1    | -             | 4.20E-07 | 5.57E-04   | 2.69E-09 | 5505                            |  |
| 7     | rs17167656 | 13927831 | 5.60E-01        | ETV1     | 7     | rs6974985  | 1.49E+08 | 6.20E-01           | KRBA1     | -             | 4.20E-07 | 7.28E-01   | 5.91E-05 | 5504                            |  |
| 1     | rs11265455 | 1.59E+08 | 8.55E-01        | SLAMF1   | 15    | rs2959930  | 70385668 | 6.97E-01           | BRUNOL6   | -             | 4.21E-07 | 5.09E-02   | 1.86E-07 | 5506                            |  |
| 3     | rs4858553  | 23896118 | 2.37E-01        | UBE2E1   | 10    | rs2762637  | 10134843 | 2.37E-01           | N/A       | -             | 4.21E-07 | 9.92E-01   | 2.09E-05 | 5507                            |  |
| 1     | rs10915971 | 2.25E+08 | 2.28E-01        | LIN9     | 16    | rs1420591  | 47607079 | 3.28E-02           | N/A       | -             | 4.21E-07 | 5.67E-01   | 8.83E-04 | 5508                            |  |
| 3     | rs2135511  | 43343543 | 3.87E-01        | SNRK     | 17    | rs4078429  | 75949967 | 1.87E-01           | RNF213    | -             | 4.21E-07 | 9.46E-01   | 8.38E-05 | 5509                            |  |
| 4     | rs17351704 | 83864655 | 7.03E-01        | SCD5     | 12    | rs3819526  | 2306783  | 4.68E-01           | CACNA1C   | -             | 4.21E-07 | 8.17E-01   | 4.71E-05 | 5510                            |  |
| 6     | rs3020375  | 1.52E+08 | 6.30E-01        | ESR1     | 3     | rs2568911  | 1.96E+08 | 3.66E-01           | N/A       | -             | 4.21E-07 | N/A        | N/A      | 5511                            |  |
| 6     | rs6900214  | 67144853 | 4.90E-01        | N/A      | 16    | rs17697705 | 64460451 | 4.63E-01           | N/A       | -             | 4.21E-07 | 8.13E-01   | 4.67E-05 | 5512                            |  |
| 2     | rs6437294  | 2.41E+08 | 1.05E-02        | OTOS     | 5     | rs9293322  | 82220254 | 3.84E-01           | N/A       | -             | 4.22E-07 | 4.13E-01   | 4.74E-04 | 5513                            |  |
| 3     | rs6767029  | 68559900 | 5.42E-01        | FAM19A1  | 4     | rs10018782 | 1.87E+08 | 7.83E-01           | SORBS2    | -             | 4.22E-07 | 5.33E-01   | 7.11E-06 | 5514                            |  |
| 4     | rs11936270 | 1.89E+08 | 1.69E-01        | N/A      | 11    | rs10769958 | 8771691  | 8.33E-01           | ST5       | -             | 4.22E-07 | 5.86E-01   | 4.33E-05 | 5515                            |  |
| 5     | rs3822476  | 77749577 | 4.95E-01        | SCAMP1   | 11    | rs1800849  | 73397813 | 6.34E-01           | UCP3      | -             | 4.22E-07 | 6.97E-01   | 2.79E-05 | 5516                            |  |
| 3     | rs2228291  | 1.86E+08 | 7.82E-01        | THPO     | 15    | rs4778036  | 90537185 | 6.23E-01           | N/A       | -             | 4.22E-07 | 7.74E-01   | 8.67E-05 | 5517                            |  |
| 1     | rs9730586  | 74734405 | 7.35E-01        | TNNI3K   | 1     | rs959163   | 1.02E+08 | 2.53E-01           | N/A       | -             | 4.22E-07 | 8.51E-01   | 4.38E-04 | 5518                            |  |
| 1     | rs1963273  | 1.7E+08  | 3.68E-01        | FMO4     | 6     | rs208636   | 22822746 | 9.23E-01           | HS3ST2    | -             | 4.22E-07 | 6.49E-01   | 1.20E-04 | 5519                            |  |
| 3     | rs168150   | 1.13E+08 | 1.06E-01        | TMPPRS7  | 15    | rs7183545  | 36762771 | 6.64E-01           | C15orf53  | -             | 4.22E-07 | 1.33E-01   | 1.77E-03 | 5520                            |  |
| 6     | rs9380215  | 31157634 | 4.29E-02        | N/A      | 6     | rs3131003  | 31201461 | 6.51E-01           | C6orf15   | MHC           | 4.22E-07 | 5.32E-01   | 2.84E-05 | 5521                            |  |
| 11    | rs1441505  | 25816359 | 2.82E-01        | N/A      | 22    | rs9616022  | 45267548 | 9.31E-01           | CELSR1    | -             | 4.22E-07 | 1.99E-01   | 6.84E-03 | 5522                            |  |
| 8     | rs6578039  | 1.41E+08 | 8.38E-03        | CKCNK9   | 16    | rs7192675  | 83101985 | 1.60E-01           | KIAA1609  | -             | 4.22E-07 | 3.47E-01   | 4.92E-06 | 5523                            |  |
| 6     | rs9397717  | 1.55E+08 | 6.24E-01        | KCNKR3   | 12    | rs1635135  | 1.12E+08 | 2.15E-01           | OAS2      | -             | 4.22E-07 | 6.36E-01   | 8.84E-05 | 5524                            |  |
| 10    | rs11257069 | 11452059 | 7.55E-01        | N/A      | 11    | rs10791774 | 1.05E+08 | 8.16E-01           | GRIA4     | -             | 4.22E-07 | 9.00E-01   | 1.55E-04 | 5525                            |  |
| 10    | rs11257069 | 11452059 | 7.55E-01        | N/A      | 11    | rs11226848 | 1.05E+08 | 8.16E-01           | GRIA4     | -             | 4.22E-07 | 9.00E-01   | 1.55E-04 | 5526                            |  |
| 6     | rs10946578 | 22854096 | 8.77E-01        | N/A      | 4     | rs6815581  | 1.39E+08 | 1.52E-01           | N/A       | -             | 4.22E-07 | 4.09E-01   | 5.81E-04 | 5527                            |  |
| 1     | rs804136   | 15006255 | 8.36E-01        | KIAA1026 | 3     | rs4305421  | 1.34E+08 | 3.51E-02           | N/A       | -             | 4.22E-07 | 5.11E-01   | 2.30E-05 | 5528                            |  |
| 4     | rs4699831  | 96185917 | 7.16E-01        | BMPRI1B  | 15    | rs1145170  | 81022977 | 5.17E-01           | CPEB1     | -             | 4.23E-07 | 3.11E-01   | 3.22E-06 | 5529                            |  |
| 9     | rs1491124  | 1.08E+08 | 9.07E-01        | N/A      | 10    | rs12573087 | 1.01E+08 | 1.21E-01           | N/A       | -             | 4.23E-07 | 4.69E-02   | 3.43E-07 | 5530                            |  |
| 6     | rs9380215  | 31157634 | 4.29E-02        | N/A      | 6     | rs3130453  | 31232828 | 5.90E-01           | TCF19     | MHC           | 4.23E-07 | 8.70E-01   | 1.19E-04 | 5531                            |  |
| 1     | rs1105489  | 2.46E+08 | 4.50E-01        | C1orf150 | 2     | rs1405343  | 76318008 | 3.10E-01           | N/A       | -             | 4.23E-07 | 4.48E-02   | 9.68E-03 | 5532                            |  |
| 12    | rs7309071  | 81138807 | 1.07E-01        | N/A      | 20    | rs2904362  | 51580068 | 1.25E-01           | N/A       | -             | 4.23E-07 | 8.07E-01   | 2.74E-05 | 5533                            |  |
| 6     | rs9362180  | 86067798 | 7.62E-01        | N/A      | 9     | rs11265905 | 91267966 | 3.52E-01           | SEMA4D    | -             | 4.23E-07 | 6.41E-01   | 2.03E-04 | 5534                            |  |
| 17    | rs4792542  | 14529207 | 2.86E-01        | N/A      | 22    | rs2845393  | 15905970 | 3.40E-01           | CECR7     | -             | 4.23E-07 | 3.90E-01   | 1.87E-03 | 5535                            |  |
| 8     | rs16912432 | 85103642 | 8.81E-01        | N/A      | 18    | rs4890506  | 40873376 | 8.96E-01           | SETBP1    | -             | 4.23E-07 | 6.63E-01   | 4.59E-05 | 5536                            |  |
| 8     | rs6991736  | 85116394 | 8.81E-01        | N/A      | 18    | rs4890506  | 40873376 | 8.96E-01           | SETBP1    | -             | 4.23E-07 | 6.63E-01   | 4.59E-05 | 5537                            |  |
| 11    | rs7937641  | 1.13E+08 | 9.99E-01        | N/A      | 18    | rs2027742  | 73210278 | 5.31E-01           | N/A       | -             | 4.23E-07 | 7.26E-01   | 7.71E-06 | 5538                            |  |
| 6     | rs4594925  | 1.69E+08 | 8.29E-01        | N/A      | 5     | rs4235460  | 65724797 | 4.53E-01           | N/A       | -             | 4.23E-07 | 5.45E-01   | 3.93E-05 | 5539                            |  |
| 11    | rs1790474  | 1.19E+08 | 4.13E-01        | N/A      | 15    | rs11634608 | 70042772 | 6.68E-01           | MYO9A     | -             | 4.23E-07 | 9.86E-01   | 1.35E-04 | 5540                            |  |
| 7     | rs2108554  | 12549605 | 4.82E-02        | N/A      | 7     | rs7794764  | 85088091 | 5.92E-01           | N/A       | -             | 4.23E-07 | 3.10E-01   | 5.81E-06 | 5541                            |  |
| 7     | rs6460282  | 63286881 | 1.27E-01        | TPST1    | 7     | rs1018995  | 1.47E+08 | 1.22E-01           | CNTN/AP2  | -             | 4.23E-07 | 8.98E-01   | 3.88E-05 | 5542                            |  |
| 14    | rs387419   | 55603832 | 3.08E-01        | N/A      | 20    | rs6024282  | 53674348 | 3.44E-01           | N/A       | -             | 4.23E-07 | 1.71E-01   | 8.04E-06 | 5543                            |  |
| 6     | rs1123969  | 1.55E+08 | 1.18E-01        | N/A      | 1     | rs1999506  | 2.35E+08 | 4.26E-01           | EDARADD   | -             | 4.23E-07 | 2.28E-01   | 6.37E-04 | 5544                            |  |
| 5     | rs359457   | 1.73E+08 | 6.98E-01        | N/A      | 8     | rs4077788  | 65933222 | 6.61E-01           | N/A       | -             | 4.23E-07 | 4.22E-01   | 2.92E-05 | 5545                            |  |
| 7     | rs7800092  | 1.31E+08 | 9.76E-02        | N/A      | 16    | rs6500343  | 49448844 | 5.45E-01           | N/A       | -             | 4.23E-07 | 6.94E-01   | 1.21E-04 | 5546                            |  |
| 15    | rs8041357  | 72656491 | 1.21E-01        | ARID3B   | 17    | rs2187116  | 68697667 | 9.09E-01           | NETO1     | -             | 4.23E-07 | 8.49E-01   | 9.45E-05 | 5547                            |  |
| 10    | rs4980259  | 1.25E+08 | 5.34E-01        | N/A      | 17    | rs2191176  | 14745432 | 2.59E-01           | N/A       | -             | 4.23E-07 | 6.34E-01   | 6.49E-05 | 5548                            |  |
| 7     | rs7803705  | 77932576 | 8.74E-01        | MAGI2    | 20    | rs12625612 | 42279088 | 8.94E-01           | C20orf111 | -             | 4.23E-07 | 7.81E-01   | 1.68E-04 | 5549                            |  |
| 7     | rs7803705  | 77932576 | 8.74E-01        | MAGI2    | 20    | rs4812799  | 42280108 | 8.94E-01           | C20orf111 | -             | 4.23E-07 | 7.81E-01   | 1.68E-04 | 5550                            |  |
| 4     | rs4240307  | 1.19E+08 | 7.96E-01        | N/A      | 5     | rs2114961  | 1.35E+08 | 3.60E-01           | N/A       | -             | 4.24E-07 | 3.09E-01   | 2.92E-04 | 5551                            |  |
| 1     | rs12027754 | 63362033 | 5.97E-01        | N/A      | 11    | rs1104139  | 7432565  | 6.89E-01           | SYT9      | -             | 4.24E-07 | 9.85E-01   | 1.29E-05 | 5552                            |  |
| 6     | rs9376770  | 1.44E+08 | 7.64E-01        | PHACTR2  | 13    | rs12430794 | 45363200 | 7.64E-01           | N/A       | -             | 4.24E-07 | 5.03E-01   | 8.69E-06 | 5553                            |  |
| 15    | rs7903114  | 1.25E+08 | 8.27E-01        | N/A      | 21    | rs2826601  | 21193520 | 8.89E-01           | N/A       | -             | 4.24E-07 | 4.76E-01   | 1.02E-05 | 5554                            |  |
| 10    | rs1896799  | 82038855 | 3.04E-01        | SH3GL3   | 20    | rs6081456  | 18907491 | 2.48E-02           | N/A       | -             | 4.24E-07 | 8.11E-01   | 2.41E-04 | 5555                            |  |
| 6     | rs2745626  | 1411547  | 5.37E-01        | N/A      | 8     | rs2014238  | 76461908 | 3.07E-01           | N/A       | -             | 4.24E-07 | 5.04E-01   | 8.45E-06 | 5556                            |  |
| 2     | rs904162   | 47363828 | 4.44E-01        | N/A      | 7     | rs1319470  | 1.17E+08 | 3.49E-01           | N/A       | -             | 4.24E-07 | 8.94E-02   | 6.07E-07 | 5557                            |  |
| 4     | rs7673610  | 76679560 | 3.80E-02        | THAP6    | 16    | rs2795571  | 6435492  | 9.03E-01           | A2BP1     | -             | 4.24E-07 | 9.11E-02</ |          |                                 |  |





| SNP A |            |           |                 |          | SNP B |            |          |                    |           | Interaction P |          |          | Ranking  | Cluster in top 100 interactions |  |
|-------|------------|-----------|-----------------|----------|-------|------------|----------|--------------------|-----------|---------------|----------|----------|----------|---------------------------------|--|
| CHR   | SNP        | Location  | gle locus P val | Gene     | CHR   | SNP        | Location | single locus P val | Gene      | MHC region    | Stage 1  | Stage 2  | Combined |                                 |  |
| 4     | rs17583808 | 1.66E+08  | 5.57E-01        | N/A      | 20    | rs6130274  | 41047898 | 7.73E-02           | PTPR      | -             | 4.41E-07 | 9.97E-02 | 1.12E-02 | 5823                            |  |
| 6     | rs454165   | 1.66E+08  | 5.89E-01        | PDE10A   | 7     | rs1799384  | 47452490 | 2.50E-01           | TNS3      | -             | 4.41E-07 | 3.09E-01 | 6.19E-04 | 5824                            |  |
| 2     | rs4669725  | 1.1448167 | 6.07E-01        | N/A      | 3     | rs9283633  | 1.66E+08 | 4.36E-01           | SI        | -             | 4.41E-07 | 4.88E-01 | 1.97E-03 | 5825                            |  |
| 2     | rs4669725  | 1.1448167 | 6.07E-01        | N/A      | 3     | rs9825346  | 1.66E+08 | 4.36E-01           | SI        | -             | 4.41E-07 | 5.08E-01 | 1.85E-03 | 5826                            |  |
| 7     | rs4607527  | 1.41E+08  | 7.87E-02        | MGAM     | 8     | rs7386095  | 1.39E+08 | 6.69E-01           | N/A       | -             | 4.41E-07 | 5.56E-01 | 5.62E-06 | 5827                            |  |
| 2     | rs1487395  | 1.88E+08  | 1.73E-01        | N/A      | 21    | rs958924   | 26498774 | 5.76E-02           | N/A       | -             | 4.41E-07 | 7.53E-01 | 1.83E-04 | 5828                            |  |
| 1     | rs1373291  | 1.12E+08  | 9.94E-01        | KCNB3    | 10    | rs2388260  | 2580305  | 1.52E-01           | N/A       | -             | 4.41E-07 | 8.07E-01 | 3.96E-05 | 5829                            |  |
| 1     | rs1373291  | 1.12E+08  | 9.94E-01        | KCNB3    | 10    | rs2388268  | 2585331  | 1.52E-01           | N/A       | -             | 4.41E-07 | 8.17E-01 | 4.11E-05 | 5830                            |  |
| 3     | rs10511051 | 76747249  | 9.79E-01        | N/A      | 4     | rs4388065  | 1.76E+08 | 8.29E-01           | ADAM29    | -             | 4.41E-07 | 9.29E-01 | 5.08E-04 | 5831                            |  |
| 6     | rs911566   | 4421201   | 3.95E-02        | N/A      | 16    | rs756813   | 23198310 | 4.85E-01           | N/A       | -             | 4.41E-07 | 4.49E-01 | 3.85E-04 | 5832                            |  |
| 1     | rs2013526  | 1.65E+08  | 9.88E-01        | ILDR2    | 22    | rs4819558  | 15996217 | 3.00E-01           | CECR5     | -             | 4.41E-07 | N/A      | N/A      | 5833                            |  |
| 6     | rs9362770  | 91463530  | 6.77E-01        | N/A      | 8     | rs1050466  | 79009024 | 8.90E-01           | N/A       | -             | 4.41E-07 | 8.39E-02 | 6.48E-07 | 5834                            |  |
| 6     | rs4928434  | 58432168  | 7.99E-01        | N/A      | 4     | rs4364309  | 1.59E+08 | 3.57E-01           | N/A       | -             | 4.41E-07 | 2.08E-01 | 6.06E-04 | 5835                            |  |
| 2     | rs10490511 | 80802274  | 8.48E-02        | N/A      | 4     | rs1969399  | 1.82E+08 | 9.51E-01           | N/A       | -             | 4.41E-07 | 4.77E-01 | 9.96E-04 | 5836                            |  |
| 7     | rs1285933  | 1.41E+08  | 9.22E-01        | CLEC5A   | 15    | rs4775214  | 57924997 | 1.59E-01           | N/A       | -             | 4.41E-07 | 8.77E-01 | 1.87E-05 | 5837                            |  |
| 11    | rs10908210 | 69283997  | 7.39E-01        | FGF4     | 13    | rs603894   | 1.02E+08 | 1.89E-01           | C13orf39  | -             | 4.42E-07 | 2.39E-01 | 1.09E-06 | 5838                            |  |
| 2     | rs12692087 | 1.3E+08   | 2.36E-01        | N/A      | 7     | rs515906   | 1.54E+08 | 1.75E-01           | DPP6      | -             | 4.42E-07 | 5.47E-01 | 1.74E-05 | 5839                            |  |
| 6     | rs1360738  | 1.43E+08  | 1.34E-01        | N/A      | 4     | rs1391010  | 76300577 | 9.83E-01           | N/A       | -             | 4.42E-07 | 6.31E-01 | 1.39E-05 | 5840                            |  |
| 6     | rs9321880  | 1.43E+08  | 1.34E-01        | N/A      | 4     | rs1391010  | 76300577 | 9.83E-01           | N/A       | -             | 4.42E-07 | N/A      | N/A      | 5841                            |  |
| 7     | rs2058152  | 13100464  | 3.88E-02        | N/A      | 19    | rs3746228  | 62496174 | 5.82E-01           | ZNF460    | -             | 4.42E-07 | 8.66E-02 | 1.49E-06 | 5842                            |  |
| 4     | rs10029516 | 1.14E+08  | 6.49E-01        | ANK2     | 16    | rs12918743 | 11531746 | 1.20E-01           | LITAF     | -             | 4.42E-07 | 3.61E-01 | 4.72E-06 | 5843                            |  |
| 11    | rs586421   | 94504982  | 1.62E-01        | ENDOD1   | 20    | rs928064   | 54837966 | 1.08E-01           | N/A       | -             | 4.42E-07 | 4.21E-01 | 2.52E-03 | 5844                            |  |
| 7     | rs774901   | 13097171  | 3.88E-02        | N/A      | 19    | rs3746228  | 62496174 | 5.82E-01           | ZNF460    | -             | 4.42E-07 | 6.91E-01 | 1.27E-05 | 5845                            |  |
| 6     | rs3094205  | 31199841  | 5.91E-01        | C6orf15  | 6     | rs7750269  | 31379136 | 8.58E-01           | N/A       | MHC           | 4.42E-07 | 6.91E-01 | 1.27E-05 | 5846                            |  |
| 7     | rs6973203  | 1.47E+08  | 1.84E-01        | CNTN/AP2 | 19    | rs422318   | 6902434  | 3.99E-01           | EMR1      | -             | 4.42E-07 | 1.63E-02 | 1.68E-07 | 5847                            |  |
| 8     | rs4871564  | 1.26E+08  | 9.34E-01        | N/A      | 17    | rs12602762 | 23219007 | 8.77E-01           | C17orf108 | -             | 4.42E-07 | 8.32E-01 | 8.96E-05 | 5848                            |  |
| 8     | rs4871562  | 1.26E+08  | 9.34E-01        | N/A      | 17    | rs12602762 | 23219007 | 8.77E-01           | C17orf108 | -             | 4.42E-07 | 8.93E-01 | 7.52E-05 | 5849                            |  |
| 4     | rs2614563  | 1.8E+08   | 1.82E-01        | N/A      | 8     | rs1380634  | 80400448 | 1.07E-01           | N/A       | -             | 4.42E-07 | 5.60E-01 | 1.41E-04 | 5850                            |  |
| 4     | rs2702386  | 1.8E+08   | 1.82E-01        | N/A      | 8     | rs1380634  | 80400448 | 1.07E-01           | N/A       | -             | 4.42E-07 | N/A      | N/A      | 5851                            |  |
| 6     | rs2295199  | 1.35E+08  | 1.94E-01        | N/A      | 19    | rs17254521 | 7189695  | 9.97E-01           | INSR      | -             | 4.42E-07 | 7.06E-02 | 9.63E-03 | 5852                            |  |
| 6     | rs9341388  | 73562825  | 7.18E-01        | KCNQ5    | 12    | rs10880377 | 41552055 | 6.29E-01           | N/A       | -             | 4.42E-07 | 8.24E-01 | 7.99E-04 | 5853                            |  |
| 5     | rs2567816  | 1.21E+08  | 6.31E-01        | N/A      | 7     | rs10464415 | 1.54E+08 | 1.52E-01           | DPP6      | -             | 4.42E-07 | 1.32E-01 | 6.59E-06 | 5854                            |  |
| 2     | rs1921627  | 77026201  | 5.37E-01        | LRRTM4   | 5     | rs1038046  | 3198652  | 5.89E-01           | N/A       | -             | 4.42E-07 | 7.17E-01 | 1.91E-05 | 5855                            |  |
| 2     | rs7572482  | 1.92E+08  | 5.02E-01        | STAT4    | 15    | rs7167270  | 94576562 | 9.93E-01           | N/A       | -             | 4.42E-07 | 5.10E-01 | 7.24E-06 | 5856                            |  |
| 6     | rs3823301  | 1.7E+08   | 1.11E-01        | FAM120B  | 12    | rs1351266  | 28168605 | 2.89E-01           | N/A       | -             | 4.42E-07 | 2.44E-01 | 3.41E-06 | 5857                            |  |
| 8     | rs13258079 | 1.22E+08  | 6.33E-01        | MTBP     | 22    | rs5768016  | 46595486 | 9.66E-01           | N/A       | -             | 4.42E-07 | 7.44E-01 | 2.96E-05 | 5858                            |  |
| 4     | rs1367528  | 1.17E+08  | 8.74E-01        | N/A      | 4     | rs9999397  | 1.34E+08 | 5.88E-01           | N/A       | -             | 4.42E-07 | 7.46E-01 | 5.11E-04 | 5859                            |  |
| 4     | rs6449012  | 13926214  | 8.95E-01        | N/A      | 4     | rs11937354 | 96756747 | 1.91E-01           | N/A       | -             | 4.43E-07 | 5.03E-01 | 4.98E-04 | 5860                            |  |
| 4     | rs6843137  | 1.3E+08   | 6.63E-01        | N/A      | 19    | rs4801731  | 52958023 | 1.21E-01           | EHD2      | -             | 4.43E-07 | 5.43E-01 | 2.28E-05 | 5861                            |  |
| 18    | rs1517033  | 55088717  | 7.53E-01        | RAX      | 20    | rs168525   | 58370741 | 3.12E-01           | N/A       | -             | 4.43E-07 | 9.08E-01 | 6.32E-05 | 5862                            |  |
| 2     | rs12612419 | 1.6E+08   | 9.90E-01        | WDSUB1   | 10    | rs4439449  | 1.14E+08 | 4.11E-01           | VTI1A     | -             | 4.43E-07 | 5.87E-01 | 3.77E-04 | 5863                            |  |
| 5     | rs10035580 | 16617901  | 7.32E-01        | FAM134B  | 9     | rs7034380  | 14898056 | 5.82E-01           | FREM1     | -             | 4.43E-07 | 4.81E-01 | 6.11E-04 | 5864                            |  |
| 10    | rs1925542  | 20986659  | 6.24E-01        | N/A      | 14    | rs1243326  | 57622646 | 9.30E-01           | C14orf37  | -             | 4.43E-07 | 4.26E-02 | 6.99E-07 | 5865                            |  |
| 6     | rs164548   | 94128329  | 5.15E-01        | EPHA7    | 3     | rs1262943  | 1.09E+08 | 1.21E-01           | LOC344595 | -             | 4.43E-07 | 3.77E-01 | 7.70E-04 | 5866                            |  |
| 5     | rs17708295 | 17022440  | 5.82E-01        | N/A      | 22    | rs4481093  | 44462694 | 9.37E-01           | ATXN10    | -             | 4.43E-07 | 3.91E-01 | 1.37E-05 | 5867                            |  |
| 15    | rs294547   | 92647763  | 3.11E-01        | MCTP2    | 20    | rs6085256  | 5655548  | 3.06E-01           | N/A       | -             | 4.43E-07 | 6.12E-01 | 1.68E-05 | 5868                            |  |
| 11    | rs1382775  | 79673362  | 9.86E-02        | N/A      | 11    | rs543876   | 1.19E+08 | 6.46E-01           | N/A       | -             | 4.43E-07 | 6.29E-01 | 1.42E-04 | 5869                            |  |
| 5     | rs1423611  | 50806871  | 7.37E-01        | N/A      | 12    | rs11045812 | 21212749 | 1.32E-01           | SLCO1B1   | -             | 4.43E-07 | 9.87E-01 | 3.17E-04 | 5870                            |  |
| 6     | rs4707657  | 91922402  | 7.63E-01        | N/A      | 12    | rs10860226 | 96537446 | 6.03E-01           | N/A       | -             | 4.43E-07 | 3.55E-01 | 3.30E-04 | 5871                            |  |
| 3     | rs1378661  | 1.62E+08  | 8.01E-01        | N/A      | 20    | rs761865   | 24021113 | 2.28E-01           | N/A       | -             | 4.43E-07 | 8.64E-01 | 3.00E-05 | 5872                            |  |
| 5     | rs6881283  | 91091413  | 2.28E-01        | N/A      | 16    | rs1075072  | 53863076 | 6.97E-01           | N/A       | -             | 4.43E-07 | 2.82E-01 | 1.12E-05 | 5873                            |  |
| 7     | rs6954727  | 40974397  | 7.75E-01        | N/A      | 8     | rs10108175 | 88832035 | 6.38E-01           | N/A       | -             | 4.43E-07 | 5.17E-01 | 1.43E-05 | 5874                            |  |
| 6     | rs483366   | 1.62E+08  | 3.18E-01        | PARK2    | 8     | rs7004118  | 85928307 | 7.04E-01           | RALYL     | -             | 4.43E-07 | 9.54E-01 | 4.14E-05 | 5875                            |  |
| 12    | rs10845538 | 12471314  | 1.13E-01        | LOH12CR1 | 12    | rs1402318  | 76753767 | 8.81E-01           | NAV3      | -             | 4.43E-07 | 8.24E-01 | 8.42E-05 | 5876                            |  |
| 8     | rs6992419  | 20609295  | 9.39E-01        | N/A      | 13    | rs4884202  | 82305944 | 2.09E-01           | N/A       | -             | 4.43E-07 | 9.88E-01 | 7.12E-05 | 5877                            |  |
| 2     | rs6431957  | 5457870   | 5.83E-02        | N/A      | 16    | rs2795571  | 6435492  | 9.03E-01           | A2BP1     | -             | 4.44E-07 | 5.31E-01 | 1.60E-05 | 5878                            |  |
| 6     | rs2844665  | 31114834  | 8.49E-01        | HCG22    | 22    | rs2071761  | 43636606 | 5.15E-01           | PHF21B    | MHC           | 4.44E-07 | 8.50E-01 | 8.34E-05 | 5879                            |  |
| 1     | rs219002   | 36899099  | 7.55E-01        | N/A      | 4     | rs1967096  | 1.76E+08 | 8.60E-02           | N/A       | -             | 4.44E-07 | 7.37E-01 | 1.28E-05 | 5880                            |  |
| 2     | rs788018   | 1.98E+08  | 8.83E-01        | SF3B1    | 10    | rs10736312 | 1.24E+08 | 3.97E-01           | BTBD16    | -             | 4.44E-07 | 2.16E-01 | 3.77E-06 | 5881                            |  |
| 2     | rs788018   | 1.98E+08  | 8.83E-01        | SF3B1    | 10    | rs2421013  | 1.24E+08 | 3.97E-01           | BTBD16    | -             | 4.44E-07 | 2.16E-01 | 3.77E-06 | 5882                            |  |
| 3     | rs7029669  | 1.09E+08  | 4.90E-01        | N/A      | 20    | rs1187968  | 96217420 | 4.05E-01           | TBC1D12   | -             | 4.44E-07 | 8.89E-01 | 9.04E-04 | 5883                            |  |
| 3     | rs4686910  | 1.89E+08  | 9.80E-01        | N/A      | 10    | rs6081622  | 19441514 | 2.89E-01           | SLC24A3   | -             | 4.44E-07 | 1.44E-01 | 1.09E-03 | 5884                            |  |
| 6     | rs674327   | 1.53E+08  | 5.82E-01        | N/A      | 20    | rs6077218  | 7443442  | 8.49E-01           | N/A       | -             | 4.44E-07 | 1.21E-01 | 6.73E-07 | 5885                            |  |
| 9     | rs10960390 | 11938271  | 9.23E-02        | N/A      | 10    | rs17578291 | 71079206 | 8.60E-01           | C10orf35  | -             | 4.44E-07 | 7.68E-01 | 2.31E-05 | 5886                            |  |
| 2     | rs962052   | 1.51E+08  | 9.58E-01        | N/A      | 7     | rs4724965  | 7273557  | 9.03E-01           | C1GALT1   | -             | 4.44E-07 | 1.53E-01 | 1.15E-02 | 5887                            |  |
| 3     | rs12489904 | 20359631  | 4.21E-01        | N/A      | 14    | rs1188692  | 55859765 | 1.29E-01           | N/A       | -             | 4.44E-07 | 6.21E-01 | 4.75E-05 | 5888                            |  |
| 3     | rs1300120  | 1.04E+08  | 2.85E-01        | N/A      | 13    | rs9534981  | 47653682 | 6.92E-01           | N/A       | -             | 4.44E-07 | 2.83E-01 | 2.57E-06 | 5889                            |  |
| 1     | rs487344   | 88490122  | 5.06E-01        | N/A      | 7     | rs4725035  | 7821066  | 3.94E-01           | N/A       | -             | 4.44E-07 | 3.06E-01 | 4.00E-06 | 5890                            |  |
| 3     | rs1300120  | 1.04E+08  | 2.85E-01        | N/A      | 13    | rs7998964  | 47686991 | 6.92E-01           | ITM2B     | -             | 4.44E-07 | 3.15E-01 | 2.99E-06 | 5891                            |  |
| 3     | rs1300120  | 1.04E+08  | 2.85E-01        | N/A      | 13    | rs9534995  | 47684077 | 6.92E-01           | N/A       | -             | 4.44E-07 | 3.15E-01 | 2.99E-06 | 5892                            |  |
| 8     | rs4469412  | 33684920  | 9.17E-01        | N/A      | 18    | rs6055558  | 10445680 | 3.89E-01           | APCDD1    | -             | 4.44E-07 | N/A      | N/A      | 5893                            |  |
| 2     | rs2595203  | 46045695  | 2.94E-01        | PRKCE    | 3     | rs9654034  | 29318469 | 8.54E-01           | N/A       | -             | 4.44E-07 | 1.32E-01 | 3.82E-06 | 5894                            |  |
| 11    | rs10790202 | 1.17E+08  |                 |          |       |            |          |                    |           |               |          |          |          |                                 |  |







| SNP A |            |          |                 |              | SNP B |            |          |                    |              | Interaction P |          |          | Ranking  | Cluster in top 100 interactions |  |
|-------|------------|----------|-----------------|--------------|-------|------------|----------|--------------------|--------------|---------------|----------|----------|----------|---------------------------------|--|
| CHR   | SNP        | Location | gle locus P val | Gene         | CHR   | SNP        | Location | single locus P val | Gene         | MHC region    | Stage 1  | Stage 2  | Combined |                                 |  |
| 3     | rs843350   | 1.85E+08 | 2.95E-01        | VWA5B2       | 13    | rs2985923  | 66653746 | 1.50E-01           | PCDH9        | -             | 4.65E-07 | 5.29E-02 | 2.45E-03 | 6271                            |  |
| 6     | rs159415   | 1.34E+08 | 5.46E-01        | EYA4         | 1     | rs11584093 | 54769601 | 7.91E-01           | ACOT11       | -             | 4.65E-07 | 4.60E-01 | 4.94E-06 | 6272                            |  |
| 4     | rs12509908 | 81294224 | 7.17E-02        | N/A          | 20    | rs6090443  | 61624230 | 7.46E-01           | PPDPF        | -             | 4.65E-07 | 5.10E-01 | 3.38E-04 | 6273                            |  |
| 2     | rs10932374 | 2.12E+08 | 3.38E-01        | ERBB4        | 13    | rs1415707  | 97294596 | 1.04E-01           | N/A          | -             | 4.65E-07 | 9.75E-01 | 8.38E-05 | 6274                            |  |
| 11    | rs475688   | 64120867 | 8.12E-01        | NRXN2        | 12    | rs7304431  | 43286606 | 4.07E-01           | NELL2        | -             | 4.65E-07 | 2.03E-01 | 1.16E-03 | 6275                            |  |
| 3     | rs9849797  | 1.45E+08 | 4.69E-02        | SLC9A9       | 17    | rs1859962  | 66620348 | 5.57E-01           | N/A          | -             | 4.65E-07 | 1.72E-01 | 5.66E-06 | 6276                            |  |
| 10    | rs7477069  | 54212144 | 4.45E-01        | MBL2         | 18    | rs3730783  | 50069281 | 1.43E-01           | POLI         | -             | 4.65E-07 | 2.25E-01 | 2.89E-06 | 6277                            |  |
| 1     | rs2948045  | 53824486 | 7.93E-01        | GLIS1        | 8     | rs2593095  | 38587762 | 1.79E-01           | RNF5P1       | -             | 4.65E-07 | 2.44E-01 | 3.30E-06 | 6278                            |  |
| 7     | rs4730287  | 1.08E+08 | 7.75E-01        | N/A          | 7     | rs6464342  | 1.53E+08 | 7.66E-01           | N/A          | -             | 4.65E-07 | 5.59E-01 | 1.67E-05 | 6279                            |  |
| 6     | rs1028318  | 25698203 | 7.81E-01        | N/A          | 2     | rs3821318  | 75240819 | 6.73E-01           | TACR1        | MHC           | 4.65E-07 | 9.82E-01 | 8.93E-05 | 6280                            |  |
| 10    | rs10788283 | 1.24E+08 | 2.17E-01        | BTBD16       | 17    | rs8074645  | 5683518  | 1.44E-01           | N/A          | -             | 4.66E-07 | 5.38E-01 | 8.86E-05 | 6281                            |  |
| 15    | rs867043   | 36297219 | 5.79E-01        | N/A          | 16    | rs11150564 | 29574237 | 6.15E-01           | SPN          | -             | 4.66E-07 | 8.49E-01 | 1.08E-04 | 6282                            |  |
| 7     | rs10155893 | 1.31E+08 | 1.51E-01        | N/A          | 21    | rs416707   | 21048681 | 4.96E-01           | C21orf131    | -             | 4.66E-07 | 3.01E-01 | 7.37E-06 | 6283                            |  |
| 5     | rs17692371 | 1.29E+08 | 9.90E-01        | CHSY3        | 19    | rs12463331 | 20935770 | 3.58E-01           | ZNF85        | -             | 4.66E-07 | N/A      | N/A      | 6284                            |  |
| 1     | rs7543486  | 14170601 | 6.45E-01        | N/A          | 10    | rs2755997  | 33415197 | 9.30E-01           | N/A          | -             | 4.66E-07 | 3.03E-01 | 2.49E-03 | 6285                            |  |
| 12    | rs964997   | 1.25E+08 | 4.28E-01        | TMEM132B     | 15    | rs4267279  | 31977983 | 8.52E-01           | AVEN         | -             | 4.66E-07 | 8.47E-01 | 6.84E-05 | 6286                            |  |
| 11    | rs12795300 | 87118134 | 1.74E-01        | N/A          | 14    | rs11626128 | 40565293 | 6.42E-01           | N/A          | -             | 4.66E-07 | 8.56E-01 | 1.70E-05 | 6287                            |  |
| 6     | rs9379638  | 10744123 | 6.89E-01        | GCNT2        | 14    | rs9285592  | 24468411 | 9.67E-01           | STXBP6       | -             | 4.66E-07 | 4.80E-01 | 3.06E-06 | 6288                            |  |
| 1     | rs12058205 | 1.89E+08 | 6.51E-01        | FAM5C        | 15    | rs8040756  | 53585891 | 1.08E-01           | DYX1C1       | -             | 4.66E-07 | 5.69E-01 | 5.72E-05 | 6289                            |  |
| 7     | rs2040933  | 1.24E+08 | 6.57E-01        | N/A          | 10    | rs805722   | 1.06E+08 | 9.63E-01           | COL17A1      | -             | 4.66E-07 | 8.28E-01 | 9.86E-05 | 6290                            |  |
| 5     | rs10046065 | 1.24E+08 | 6.30E-01        | N/A          | 11    | rs1940640  | 94000460 | 4.42E-01           | PIWIL4       | -             | 4.66E-07 | 4.63E-01 | 6.98E-04 | 6291                            |  |
| 3     | rs12631386 | 1.35E+08 | 4.49E-02        | N/A          | 5     | rs2060428  | 1.37E+08 | 6.22E-01           | SPOCK1       | -             | 4.66E-07 | 6.49E-01 | 1.36E-03 | 6292                            |  |
| 6     | rs11759320 | 1.48E+08 | 2.98E-01        | N/A          | 5     | rs6870285  | 1.25E+08 | 5.79E-01           | N/A          | -             | 4.66E-07 | 1.76E-01 | 5.26E-06 | 6293                            |  |
| 2     | rs4851794  | 1.06E+08 | 6.23E-01        | N/A          | 8     | rs2458285  | 1.04E+08 | 1.60E-01           | N/A          | -             | 4.66E-07 | 4.03E-01 | 2.06E-04 | 6294                            |  |
| 12    | rs1683709  | 1.27E+08 | 5.57E-01        | TMEM132C     | 14    | rs227019   | 22064646 | 3.29E-01           | N/A          | -             | 4.66E-07 | 7.72E-01 | 1.18E-04 | 6295                            |  |
| 7     | rs17171480 | 35552194 | 6.06E-01        | N/A          | 8     | rs1463259  | 82900300 | 4.00E-01           | SNX16        | -             | 4.66E-07 | 5.20E-01 | 1.82E-04 | 6296                            |  |
| 6     | rs4594993  | 29378477 | 2.80E-01        | OR14J1       | 4     | rs4833753  | 1.23E+08 | 5.94E-02           | N/A          | MHC           | 4.66E-07 | 6.78E-01 | 5.61E-05 | 6297                            |  |
| 5     | rs323700   | 2617243  | 6.01E-01        | N/A          | 9     | rs2885068  | 53405328 | 3.95E-01           | ST18         | -             | 4.67E-07 | 1.84E-01 | 9.06E-04 | 6298                            |  |
| 6     | rs847848   | 35014146 | 5.60E-01        | ANKS1A       | 8     | rs372957   | 31962985 | 1.19E-01           | N/A          | MHC           | 4.67E-07 | 1.13E-01 | 1.56E-03 | 6299                            |  |
| 6     | rs847848   | 35014146 | 5.60E-01        | ANKS1A       | 9     | rs453019   | 31975376 | 1.19E-01           | N/A          | MHC           | 4.67E-07 | 1.18E-01 | 1.48E-03 | 6300                            |  |
| 2     | rs7425117  | 99811462 | 2.20E-01        | AFF3         | 8     | rs3885590  | 10864279 | 5.90E-01           | XKR6         | -             | 4.67E-07 | 8.38E-01 | 1.58E-04 | 6301                            |  |
| 1     | rs4649419  | 2.31E+08 | 5.59E-01        | C1orf57      | 13    | rs2765584  | 1.03E+08 | 5.14E-01           | N/A          | -             | 4.67E-07 | 9.46E-01 | 1.12E-04 | 6302                            |  |
| 1     | rs12140478 | 70595826 | 2.66E-01        | ANKRD13C     | 8     | rs961465   | 69732037 | 6.09E-02           | C8orf34      | -             | 4.67E-07 | 1.14E-01 | 2.88E-03 | 6303                            |  |
| 4     | rs2196978  | 80754993 | 5.99E-02        | N/A          | 7     | rs10272997 | 70402452 | 5.44E-01           | WBSCR17      | -             | 4.67E-07 | 1.91E-01 | 3.22E-06 | 6304                            |  |
| 6     | rs7741397  | 1.66E+08 | 8.81E-01        | N/A          | 3     | rs6764089  | 77104959 | 5.26E-01           | N/A          | -             | 4.67E-07 | 7.23E-01 | 2.00E-05 | 6305                            |  |
| 3     | rs10510920 | 64892123 | 3.04E-01        | MIR548A2     | 3     | rs12636725 | 1.51E+08 | 2.92E-01           | VWTR1        | -             | 4.67E-07 | 9.12E-01 | 3.68E-05 | 6306                            |  |
| 3     | rs4312641  | 15975891 | 3.46E-01        | N/A          | 4     | rs1395652  | 60231878 | 6.00E-01           | N/A          | -             | 4.67E-07 | N/A      | N/A      | 6307                            |  |
| 9     | rs10511574 | 11941204 | 3.79E-01        | N/A          | 22    | rs5992838  | 16644831 | 1.46E-01           | BID          | -             | 4.67E-07 | 2.73E-02 | 1.90E-07 | 6308                            |  |
| 16    | rs2386570  | 50690049 | 6.58E-01        | N/A          | 16    | rs11642248 | 81374764 | 5.23E-01           | CDH13        | -             | 4.67E-07 | 4.84E-01 | 3.07E-04 | 6309                            |  |
| 8     | rs2511692  | 1.04E+08 | 2.82E-01        | N/A          | 13    | rs4885319  | 75057105 | 7.13E-01           | UCHL3        | -             | 4.67E-07 | 5.65E-01 | 1.75E-05 | 6310                            |  |
| 5     | rs11745467 | 85695581 | 2.77E-01        | N/A          | 10    | rs1856591  | 44918624 | 3.29E-01           | LOC100133308 | -             | 4.67E-07 | 7.52E-01 | 1.18E-04 | 6311                            |  |
| 6     | rs474519   | 10902522 | 4.30E-01        | MAK          | 18    | rs10454095 | 18031438 | 5.72E-02           | GATA6        | -             | 4.68E-07 | 5.28E-01 | 9.05E-04 | 6312                            |  |
| 9     | rs4978813  | 1.11E+08 | 4.45E-01        | PTPN3        | 17    | rs8068489  | 69363038 | 3.85E-01           | N/A          | -             | 4.68E-07 | 6.16E-01 | 1.59E-04 | 6313                            |  |
| 12    | rs11109097 | 96452568 | 5.25E-01        | RMST         | 21    | rs12482877 | 44905807 | 2.59E-01           | C21orf29     | -             | 4.68E-07 | 6.66E-01 | 4.44E-05 | 6314                            |  |
| 4     | rs4862611  | 1.87E+08 | 1.86E-03        | N/A          | 11    | rs17143395 | 61687956 | 6.24E-02           | N/A          | -             | 4.68E-07 | 2.31E-01 | 5.14E-04 | 6315                            |  |
| 12    | rs1656535  | 41734204 | 5.59E-01        | N/A          | 12    | rs1527790  | 76647901 | 1.07E-01           | N/A          | -             | 4.68E-07 | 7.91E-01 | 1.25E-05 | 6316                            |  |
| 8     | rs4831871  | 12995282 | 4.86E-02        | DLC1         | 20    | rs10485804 | 54239111 | 7.83E-01           | MC3R         | -             | 4.68E-07 | N/A      | N/A      | 6317                            |  |
| 2     | rs1476698  | 2.42E+08 | 7.09E-01        | FARP2        | 15    | rs2047667  | 51126053 | 4.76E-02           | N/A          | -             | 4.68E-07 | 3.52E-03 | 1.91E-02 | 6318                            |  |
| 12    | rs987839   | 21266105 | 6.20E-01        | SLCO1B1      | 21    | rs6586245  | 41927730 | 2.66E-01           | N/A          | -             | 4.68E-07 | 3.92E-01 | 1.15E-05 | 6319                            |  |
| 2     | rs888011   | 2.02E+08 | 9.75E-01        | ALS2CR4      | 11    | rs2277279  | 1.05E+08 | 4.76E-01           | GRIA4        | -             | 4.68E-07 | 3.06E-02 | 2.87E-07 | 6320                            |  |
| 8     | rs10108007 | 61310616 | 4.24E-01        | CA8          | 16    | rs1423904  | 59023860 | 6.69E-01           | N/A          | -             | 4.68E-07 | 8.23E-01 | 6.59E-05 | 6321                            |  |
| 4     | rs10027979 | 88675465 | 8.89E-01        | SPARCL1      | 9     | rs4618799  | 18109661 | 7.02E-01           | N/A          | -             | 4.68E-07 | 5.65E-01 | 7.55E-06 | 6322                            |  |
| 2     | rs259833   | 1.8E+08  | 8.75E-01        | ZNF385B      | 4     | rs10015715 | 58946804 | 7.11E-01           | N/A          | -             | 4.69E-07 | 9.36E-01 | 7.14E-05 | 6323                            |  |
| 1     | rs6660548  | 22552666 | 3.08E-01        | N/A          | 7     | rs10277166 | 42271762 | 7.23E-01           | N/A          | -             | 4.69E-07 | 6.65E-02 | 2.08E-02 | 6324                            |  |
| 3     | rs442800   | 1.39E+08 | 3.26E-01        | N/A          | 8     | rs1500906  | 96601801 | 1.79E-01           | N/A          | -             | 4.69E-07 | 1.88E-01 | 4.15E-03 | 6325                            |  |
| 3     | rs442800   | 1.39E+08 | 3.26E-01        | N/A          | 8     | rs1500909  | 96602267 | 1.79E-01           | N/A          | -             | 4.69E-07 | 1.88E-01 | 4.15E-03 | 6326                            |  |
| 13    | rs17294949 | 44524937 | 5.94E-01        | N/A          | 16    | rs7404068  | 71847434 | 2.01E-01           | N/A          | -             | 4.69E-07 | 8.67E-01 | 8.14E-05 | 6327                            |  |
| 2     | rs7558782  | 45389180 | 7.44E-01        | N/A          | 15    | rs11070857 | 49644512 | 4.49E-01           | DMXL2        | -             | 4.69E-07 | 5.36E-01 | 1.76E-05 | 6328                            |  |
| 1     | rs2065140  | 1.76E+08 | 1.21E-01        | N/A          | 3     | rs1456669  | 1.49E+08 | 3.45E-01           | N/A          | -             | 4.69E-07 | 5.24E-02 | 4.12E-07 | 6329                            |  |
| 6     | rs879882   | 31247431 | 7.61E-01        | TCF19        | 6     | rs2596560  | 31463297 | 2.87E-01           | MICA         | MHC           | 4.69E-07 | 5.38E-01 | 5.40E-04 | 6330                            |  |
| 7     | rs3818408  | 10496639 | 7.25E-01        | TFAP2A       | 2     | rs1075708  | 2.32E+08 | 2.20E-02           | C2orf57      | -             | 4.69E-07 | 6.93E-01 | 4.61E-05 | 6331                            |  |
| 7     | rs2471189  | 1.22E+08 | 7.66E-01        | CADPS2       | 7     | rs10241443 | 1.38E+08 | 7.83E-01           | ATP6V0A4     | -             | 4.69E-07 | N/A      | N/A      | 6332                            |  |
| 13    | rs6492238  | 1.1E+08  | 9.41E-02        | N/A          | 16    | rs8045995  | 81255449 | 3.88E-01           | CDH13        | -             | 4.69E-07 | 1.68E-01 | 4.27E-03 | 6333                            |  |
| 7     | rs2726005  | 85398458 | 8.77E-01        | N/A          | 13    | rs1708684  | 28064399 | 5.75E-01           | N/A          | -             | 4.69E-07 | 5.60E-01 | 2.99E-04 | 6334                            |  |
| 6     | rs2690107  | 25438517 | 2.75E-01        | N/A          | 8     | rs6982250  | 70575004 | 8.99E-01           | SULF1        | MHC           | 4.69E-07 | 1.15E-01 | 4.19E-03 | 6335                            |  |
| 19    | rs10425594 | 44581531 | 5.59E-01        | SAMD4B       | 20    | rs3828016  | 1865290  | 9.92E-01           | SIRPA        | -             | 4.69E-07 | 4.66E-01 | 9.38E-04 | 6336                            |  |
| 1     | rs17102086 | 46495526 | 7.73E-01        | RAD54L       | 13    | rs9572574  | 70408059 | 6.02E-02           | N/A          | -             | 4.69E-07 | 9.43E-01 | 6.23E-05 | 6337                            |  |
| 7     | rs7806522  | 34056348 | 8.00E-01        | BMPEP        | 7     | rs13228727 | 37555747 | 4.44E-01           | N/A          | -             | 4.69E-07 | 5.71E-01 | 2.17E-04 | 6338                            |  |
| 13    | rs11617984 | 18520143 | 4.78E-01        | DKFZp686A162 | 13    | rs9546698  | 83931934 | 2.41E-01           | N/A          | -             | 4.69E-07 | 8.74E-01 | 7.06E-05 | 6339                            |  |
| 4     | rs2131466  | 28426304 | 8.00E-01        | N/A          | 9     | rs7846724  | 12808692 | 6.34E-01           | C9orf150     | -             | 4.69E-07 | 7.52E-01 | 7.02E-05 | 6340                            |  |
| 3     | rs4395346  | 38826088 | 9.80E-01        | SCN10A       | 14    | rs10140652 | 19761728 | 6.10E-01           | OR11H6       | -             | 4.70E-07 | 2.65E-02 | 3.12E-03 | 6341                            |  |
| 3     | rs7627881  | 38822156 | 9.80E-01        | SCN10A       | 14    | rs10140652 | 19761728 | 6.10E-01           | OR1          |               |          |          |          |                                 |  |



| SNP A |            |          |                |          | SNP B |            |          |                      |          | Interaction P |          |          | Ranking  | Cluster in top 100 interactions |  |
|-------|------------|----------|----------------|----------|-------|------------|----------|----------------------|----------|---------------|----------|----------|----------|---------------------------------|--|
| CHR   | SNP        | Location | gle locus P va | Gene     | CHR   | SNP        | Location | single locus P value | Gene     | MHC region    | Stage 1  | Stage 2  | Combined |                                 |  |
| 1     | rs7519595  | 1.75E+08 | 5.81E-02       | ASTN1    | 4     | rs3815464  | 25280141 | 9.09E-01             | N/A      | -             | 4.80E-07 | 1.23E-01 | 3.15E-06 | 6495                            |  |
| 4     | rs4314329  | 31960561 | 3.19E-01       | N/A      | 8     | rs1016646  | 20307688 | 5.76E-01             | N/A      | -             | 4.80E-07 | 9.40E-01 | 3.02E-05 | 6496                            |  |
| 3     | rs2574720  | 11635412 | 1.97E-01       | VGLL4    | 8     | rs456683   | 3077005  | 2.46E-01             | CSDM1    | -             | 4.80E-07 | 1.11E-01 | 1.96E-03 | 6497                            |  |
| 3     | rs10514734 | 77687380 | 9.95E-01       | ROBO2    | 5     | rs9327428  | 1.26E+08 | 5.43E-01             | 3-Mar    | -             | 4.80E-07 | 7.86E-01 | 1.78E-04 | 6498                            |  |
| 1     | rs987293   | 18324487 | 3.40E-01       | IGSF1    | 13    | rs4372573  | 90417134 | 5.26E-01             | N/A      | -             | 4.80E-07 | 2.24E-01 | 4.15E-06 | 6499                            |  |
| 3     | rs1917072  | 78289877 | 9.02E-01       | N/A      | 10    | rs1078819  | 1.23E+08 | 8.55E-01             | N/A      | -             | 4.80E-07 | 6.91E-01 | 2.58E-05 | 6500                            |  |
| 12    | rs4767944  | 1.11E+08 | 8.85E-01       | ACAD10   | 14    | rs1014185  | 97886923 | 1.51E-01             | N/A      | -             | 4.81E-07 | 2.88E-01 | 8.91E-06 | 6501                            |  |
| 6     | rs9394169  | 33886942 | 1.87E-01       | MLN      | 11    | rs7112954  | 1127086  | 4.52E-01             | N/A      | MHC           | 4.81E-07 | 3.50E-01 | 8.92E-06 | 6502                            |  |
| 8     | rs2514710  | 1.01E+08 | 1.50E-01       | SPAG1    | 11    | rs1241967  | 1.07E+08 | 7.73E-01             | N/A      | -             | 4.81E-07 | 6.47E-01 | 1.78E-04 | 6503                            |  |
| 2     | rs10187622 | 1.88E+08 | 8.82E-01       | TFPI     | 18    | rs4940002  | 46449193 | 4.85E-01             | MAPK4    | -             | 4.81E-07 | 7.88E-01 | 5.40E-04 | 6504                            |  |
| 2     | rs10179730 | 1.88E+08 | 9.34E-01       | TFPI     | 18    | rs4940002  | 46449193 | 4.85E-01             | MAPK4    | -             | 4.81E-07 | 7.88E-01 | 4.91E-04 | 6505                            |  |
| 1     | rs868584   | 2.31E+08 | 7.01E-01       | N/A      | 7     | rs157911   | 1.3E+08  | 5.87E-01             | MIR29B1  | -             | 4.81E-07 | 3.43E-01 | 1.75E-05 | 6506                            |  |
| 3     | rs993558   | 1.59E+08 | 5.44E-01       | N/A      | 11    | rs1783217  | 58225294 | 3.15E-01             | GLYAT    | -             | 4.81E-07 | 8.49E-01 | 2.55E-04 | 6507                            |  |
| 4     | rs1948250  | 1.19E+08 | 5.57E-01       | N/A      | 7     | rs741304   | 36769525 | 9.92E-01             | N/A      | -             | 4.81E-07 | 8.85E-01 | 1.75E-04 | 6508                            |  |
| 8     | rs411279   | 90877299 | 1.63E-01       | RIPK2    | 17    | rs1045122  | 73195845 | 8.35E-02             | N/A      | -             | 4.81E-07 | 9.34E-02 | 2.02E-06 | 6509                            |  |
| 2     | rs2274412  | 2.16E+08 | 2.71E-01       | ABCA12   | 17    | rs1107830  | 15411904 | 9.73E-01             | FAM18B2  | -             | 4.81E-07 | 1.44E-01 | 5.54E-04 | 6510                            |  |
| 5     | rs1600178  | 51894999 | 9.08E-01       | N/A      | 11    | rs1384751  | 83432571 | 3.75E-02             | DLG2     | -             | 4.81E-07 | 6.18E-01 | 3.72E-04 | 6511                            |  |
| 7     | rs2023910  | 21524379 | 8.73E-01       | SP4      | 8     | rs17347502 | 4618657  | 5.03E-01             | CSDM1    | -             | 4.81E-07 | 6.45E-01 | 2.35E-05 | 6512                            |  |
| 8     | rs2697675  | 91002125 | 8.04E-01       | NBN      | 8     | rs3104899  | 96689580 | 6.18E-01             | N/A      | -             | 4.81E-07 | 7.91E-01 | 6.38E-05 | 6513                            |  |
| 1     | rs845451   | 2.08E+08 | 9.45E-01       | SERTAD4  | 12    | rs7963902  | 4988938  | 9.11E-01             | N/A      | -             | 4.81E-07 | 7.98E-01 | 1.60E-04 | 6514                            |  |
| 15    | rs4778368  | 21764708 | 4.65E-01       | N/A      | 17    | rs4794737  | 52855906 | 3.47E-01             | MSI2     | -             | 4.81E-07 | 9.97E-01 | 1.45E-04 | 6515                            |  |
| 11    | rs286911   | 34613797 | 6.17E-02       | EHF      | 17    | rs1165899  | 29790363 | 3.01E-01             | N/A      | -             | 4.81E-07 | 1.40E-01 | 2.71E-03 | 6516                            |  |
| 1     | rs313710   | 86024424 | 8.56E-01       | COL24A1  | 4     | rs7659060  | 1.4E+08  | 7.60E-01             | N/A      | -             | 4.81E-07 | 1.43E-01 | 1.44E-03 | 6517                            |  |
| 17    | rs10512556 | 66449189 | 5.04E-01       | N/A      | 19    | rs408687   | 22022963 | 6.99E-01             | ZNF257   | -             | 4.81E-07 | 3.20E-01 | 1.34E-03 | 6518                            |  |
| 17    | rs10512556 | 66449189 | 5.04E-01       | N/A      | 19    | rs409835   | 22022511 | 6.99E-01             | ZNF257   | -             | 4.81E-07 | 3.20E-01 | 1.34E-03 | 6519                            |  |
| 17    | rs10512556 | 66449189 | 5.04E-01       | N/A      | 19    | rs411020   | 22022942 | 6.99E-01             | ZNF257   | -             | 4.81E-07 | 3.20E-01 | 1.34E-03 | 6520                            |  |
| 17    | rs11653075 | 50228743 | 6.77E-01       | N/A      | 20    | rs2206426  | 40719457 | 9.61E-01             | PTPRT    | -             | 4.81E-07 | 5.28E-01 | 4.33E-04 | 6521                            |  |
| 2     | rs10185841 | 1.46E+08 | 9.99E-02       | N/A      | 3     | rs9845872  | 62816561 | 8.94E-01             | CADPS    | -             | 4.81E-07 | 7.64E-02 | 5.83E-07 | 6522                            |  |
| 2     | rs4854547  | 69196037 | 8.62E-01       | ANTXR1   | 5     | rs4975684  | 1131642  | 9.89E-01             | SLC12A7  | -             | 4.81E-07 | 1.02E-01 | 1.12E-06 | 6523                            |  |
| 5     | rs710998   | 3644916  | 6.03E-02       | IRX1     | 22    | rs11704605 | 44630591 | 3.50E-01             | ATXN1    | -             | 4.81E-07 | 4.25E-01 | 1.99E-05 | 6524                            |  |
| 13    | rs2148443  | 22885650 | 3.12E-01       | SACS     | 16    | rs244810   | 82827257 | 8.79E-01             | KCNQ4    | -             | 4.81E-07 | 7.39E-01 | 4.61E-05 | 6525                            |  |
| 5     | rs6870688  | 93391891 | 8.26E-02       | FAM172A  | 8     | rs3134521  | 96868093 | 2.74E-01             | N/A      | -             | 4.81E-07 | 2.96E-01 | 3.12E-06 | 6526                            |  |
| 5     | rs1026985  | 1.79E+08 | 9.77E-02       | N/A      | 12    | rs1084854  | 1653512  | 6.14E-01             | ADIPOR2  | -             | 4.81E-07 | 4.86E-01 | 3.35E-04 | 6527                            |  |
| 1     | rs758518   | 1.17E+08 | 9.71E-02       | CD58     | 4     | rs2192356  | 15033689 | 5.94E-01             | C1QTNF7  | -             | 4.81E-07 | 8.05E-01 | 6.11E-04 | 6528                            |  |
| 7     | rs1880957  | 80192165 | 6.79E-01       | SEMA3C   | 7     | rs10464592 | 96068622 | 9.27E-01             | N/A      | -             | 4.82E-07 | 6.59E-01 | 3.76E-04 | 6529                            |  |
| 6     | rs1199389  | 8336115  | 7.69E-01       | N/A      | 17    | rs638538   | 65727723 | 5.11E-01             | N/A      | -             | 4.82E-07 | 6.63E-02 | 5.41E-03 | 6530                            |  |
| 6     | rs500110   | 1.48E+08 | 2.41E-01       | N/A      | 1     | rs10864334 | 8142693  | 6.24E-01             | N/A      | -             | 4.82E-07 | 2.55E-01 | 2.33E-03 | 6531                            |  |
| 6     | rs500110   | 1.48E+08 | 2.41E-01       | N/A      | 1     | rs7524007  | 8140793  | 6.24E-01             | N/A      | -             | 4.82E-07 | 2.55E-01 | 2.33E-03 | 6532                            |  |
| 6     | rs500110   | 1.48E+08 | 2.41E-01       | N/A      | 1     | rs1121111  | 8139890  | 6.24E-01             | N/A      | -             | 4.82E-07 | 2.98E-01 | 1.96E-03 | 6533                            |  |
| 5     | rs877886   | 7712279  | 7.77E-01       | ADCY2    | 13    | rs1326426  | 88073196 | 2.43E-01             | N/A      | -             | 4.82E-07 | 4.62E-01 | 2.13E-05 | 6534                            |  |
| 5     | rs700862   | 7699404  | 7.77E-01       | ADCY2    | 13    | rs1326426  | 88073196 | 2.43E-01             | N/A      | -             | 4.82E-07 | 4.62E-01 | 2.24E-05 | 6535                            |  |
| 2     | rs1177234  | 61113567 | 5.69E-01       | PUS10    | 8     | rs2726555  | 59947966 | 8.90E-01             | TOX      | -             | 4.82E-07 | 1.58E-01 | 7.37E-04 | 6536                            |  |
| 6     | rs1514348  | 1.52E+08 | 6.65E-01       | ESR1     | 3     | rs7632980  | 64602857 | 1.06E-01             | ADAMTS9  | -             | 4.82E-07 | 4.80E-01 | 7.48E-05 | 6537                            |  |
| 16    | rs7188406  | 70179708 | 1.42E-01       | TAT      | 20    | rs6123045  | 49552249 | 4.33E-01             | NFATC2   | -             | 4.82E-07 | 6.89E-01 | 9.12E-06 | 6538                            |  |
| 5     | rs10056967 | 33089900 | 7.00E-01       | N/A      | 10    | rs1925819  | 15492765 | 9.69E-01             | N/A      | -             | 4.82E-07 | 4.35E-01 | 1.15E-06 | 6539                            |  |
| 6     | rs7761614  | 97494900 | 7.25E-01       | KLHL32   | 19    | rs740867   | 61886961 | 1.13E-02             | ZNF835   | -             | 4.82E-07 | 3.50E-02 | 4.51E-06 | 6540                            |  |
| 6     | rs2252551  | 34730654 | 3.57E-01       | C6orf106 | 5     | rs2336837  | 72037229 | 8.11E-02             | N/A      | MHC           | 4.82E-07 | 3.50E-02 | 4.51E-06 | 6541                            |  |
| 5     | rs10942656 | 91323193 | 9.67E-01       | N/A      | 8     | rs10098725 | 1.29E+08 | 6.01E-02             | N/A      | -             | 4.82E-07 | 6.29E-02 | 5.38E-03 | 6542                            |  |
| 6     | rs2815003  | 34743787 | 3.57E-01       | C6orf106 | 5     | rs2336837  | 72037229 | 8.11E-02             | N/A      | MHC           | 4.82E-07 | 5.58E-01 | 2.01E-04 | 6543                            |  |
| 5     | rs2964145  | 5401640  | 4.16E-01       | N/A      | 8     | rs10488368 | 180568   | 1.15E-01             | ZNF596   | -             | 4.82E-07 | 7.96E-01 | 6.55E-05 | 6544                            |  |
| 1     | rs10889187 | 60783346 | 3.61E-01       | N/A      | 5     | rs10056028 | 1.69E+08 | 9.38E-02             | SLIT3    | -             | 4.82E-07 | 5.88E-01 | 1.11E-05 | 6545                            |  |
| 1     | rs11207633 | 60779770 | 3.61E-01       | N/A      | 5     | rs10056028 | 1.69E+08 | 9.38E-02             | SLIT3    | -             | 4.82E-07 | 6.62E-01 | 1.54E-05 | 6546                            |  |
| 8     | rs10216986 | 3032515  | 3.00E-01       | CSDM1    | 8     | rs1126681  | 97674976 | 8.90E-01             | SDC2     | -             | 4.83E-07 | 4.43E-01 | 3.30E-06 | 6547                            |  |
| 8     | rs17319192 | 3032637  | 3.00E-01       | CSDM1    | 8     | rs1126681  | 97674976 | 8.90E-01             | SDC2     | -             | 4.83E-07 | 5.10E-01 | 4.34E-06 | 6548                            |  |
| 2     | rs10803494 | 1.44E+08 | 8.53E-01       | HRHGAP15 | 20    | rs4811626  | 53812550 | 1.41E-01             | N/A      | -             | 4.83E-07 | 7.95E-01 | 2.30E-05 | 6549                            |  |
| 1     | rs2886208  | 2.43E+08 | 9.22E-01       | EFCAB2   | 10    | rs6480209  | 68177427 | 3.49E-03             | CTNNA3   | -             | 4.83E-07 | 6.27E-01 | 3.94E-05 | 6550                            |  |
| 1     | rs203777   | 1.66E+08 | 5.46E-01       | BRP44    | 13    | rs9574952  | 81200154 | 3.28E-02             | N/A      | -             | 4.83E-07 | 6.49E-01 | 4.17E-05 | 6551                            |  |
| 1     | rs1470438  | 1.02E+08 | 6.01E-01       | N/A      | 5     | rs68860945 | 16600195 | 7.78E-01             | FAM134B  | -             | 4.83E-07 | 7.34E-01 | 1.71E-04 | 6552                            |  |
| 11    | rs3902836  | 1.13E+08 | 3.61E-01       | TMPPRSS5 | 16    | rs8047350  | 73236745 | 7.81E-01             | RFWF3    | -             | 4.83E-07 | 7.53E-01 | 8.52E-05 | 6553                            |  |
| 3     | rs4855919  | 1.18E+08 | 8.75E-01       | N/A      | 10    | rs10822321 | 66041735 | 2.75E-01             | N/A      | -             | 4.83E-07 | 8.01E-01 | 3.14E-05 | 6554                            |  |
| 6     | rs16882886 | 52673487 | 2.45E-01       | TMEM14A  | 7     | rs12670938 | 10734918 | 5.00E-01             | N/A      | -             | 4.83E-07 | 2.17E-01 | 4.44E-06 | 6555                            |  |
| 1     | rs4465172  | 2.13E+08 | 6.30E-02       | PTPN14   | 18    | rs9960247  | 10269250 | 3.17E-01             | N/A      | -             | 4.83E-07 | 9.75E-01 | 4.83E-05 | 6556                            |  |
| 1     | rs12037907 | 67745023 | 9.25E-01       | N/A      | 3     | rs11927581 | 29043754 | 5.63E-02             | N/A      | -             | 4.83E-07 | 2.35E-01 | 2.18E-05 | 6557                            |  |
| 6     | rs2021678  | 1.02E+08 | 2.43E-01       | GRIK2    | 20    | rs6074272  | 1130173  | 9.26E-01             | C20orf46 | -             | 4.83E-07 | 7.08E-01 | 1.04E-05 | 6558                            |  |
| 3     | rs11715745 | 63466181 | 5.22E-02       | SYNPR    | 3     | rs12490088 | 1.79E+08 | 1.74E-01             | N/A      | -             | 4.83E-07 | 8.53E-01 | 1.80E-05 | 6559                            |  |
| 1     | rs16860761 | 1.67E+08 | 2.55E-01       | XCL2     | 22    | rs9626344  | 44236582 | 4.46E-01             | N/A      | -             | 4.83E-07 | N/A      | N/A      | 6560                            |  |
| 2     | rs1027901  | 2.11E+08 | 6.72E-02       | LANCL1   | 16    | rs8060485  | 57460142 | 3.78E-01             | N/A      | -             | 4.83E-07 | 7.97E-01 | 2.06E-04 | 6561                            |  |
| 11    | rs984333   | 25822965 | 3.11E-01       | N/A      | 22    | rs9616022  | 45267548 | 9.31E-01             | CELSR1   | -             | 4.83E-07 | 2.04E-01 | 7.59E-03 | 6562                            |  |
| 4     | rs4862612  | 1.87E+08 | 6.27E-04       | N/A      | 22    | rs1012480  | 24661264 | 1.12E-01             | MYO18B   | -             | 4.83E-07 | 2.58E-01 | 7.88E-04 | 6563                            |  |
| 4     | rs7665758  | 46652454 | 1.94E-01       | GABRA4   | 17    | rs8068010  | 4278869  | 2.49E-01             | SPNS3    | -             | 4.83E-07 | 3.40E-01 | 3.30E-04 | 6564                            |  |
| 11    | rs486621   | 78603685 | 2.89E-02       | ODZ4     | 17    | rs1515022  | 74017503 | 3.27E-01             | DNAAH17  | -             | 4.83E-07 | 6.26E-01 | 4.73E-04 | 6565                            |  |
| 4     | rs10003340 | 38385826 | 9.28E-01       | KLF3     | 12    | rs11061312 | 1.3E+08  | 8.31E-01             | GPR133   | -             |          |          |          |                                 |  |











| SNP A |            |          |                |          | SNP B |            |          |                      |          | Interaction P |          |          | Ranking  | Cluster in top 100 interactions |  |
|-------|------------|----------|----------------|----------|-------|------------|----------|----------------------|----------|---------------|----------|----------|----------|---------------------------------|--|
| CHR   | SNP        | Location | gle locus P va | Gene     | CHR   | SNP        | Location | single locus P value | Gene     | MHC region    | Stage 1  | Stage 2  | Combined |                                 |  |
| 5     | rs381034   | 60927962 | 7.83E-01       | N/A      | 18    | rs903733   | 32438195 | 7.11E-01             | FHOD3    | -             | 5.17E-07 | 5.17E-01 | 2.67E-03 | 7167                            |  |
| 4     | rs11724795 | 1.49E+08 | 6.95E-01       | ARHGAP10 | 8     | rs2272641  | 23350706 | 3.13E-01             | ENTPD4   | -             | 5.17E-07 | 3.66E-01 | 8.73E-06 | 7168                            |  |
| 6     | rs510849   | 1.62E+08 | 4.00E-01       | PARK2    | 8     | rs4740033  | 85925158 | 5.24E-01             | RALYL    | -             | 5.17E-07 | 3.76E-01 | 1.18E-06 | 7169                            |  |
| 1     | rs606149   | 1.92E+08 | 7.23E-01       | N/A      | 17    | rs6573604  | 64857694 | 1.15E-01             | N/A      | -             | 5.17E-07 | 9.88E-02 | 5.13E-03 | 7170                            |  |
| 1     | rs10903128 | 25235925 | 7.89E-01       | N/A      | 14    | rs4985650  | 5761818  | 8.96E-01             | N/A      | -             | 5.17E-07 | 7.75E-01 | 2.00E-04 | 7171                            |  |
| 4     | rs11096754 | 34674459 | 8.16E-01       | N/A      | 11    | rs3740958  | 36429376 | 2.52E-02             | PRR5L    | -             | 5.17E-07 | N/A      | N/A      | 7172                            |  |
| 14    | rs11158751 | 68101178 | 8.01E-01       | RAD51L1  | 20    | rs1080026  | 42846612 | 5.00E-01             | RIMS4    | -             | 5.18E-07 | 5.11E-01 | 2.09E-05 | 7173                            |  |
| 2     | rs16825115 | 2.29E+08 | 5.37E-01       | N/A      | 3     | rs6804761  | 1.71E+08 | 9.05E-01             | SEC62    | -             | 5.18E-07 | 2.35E-01 | 1.03E-03 | 7174                            |  |
| 8     | rs13260745 | 20608472 | 7.96E-01       | N/A      | 13    | rs4884202  | 82305944 | 2.09E-01             | N/A      | -             | 5.18E-07 | 9.11E-01 | 3.30E-05 | 7175                            |  |
| 4     | rs9993793  | 16749737 | 9.46E-01       | N/A      | 19    | rs643786   | 55547761 | 5.81E-03             | N/APS8   | -             | 5.18E-07 | 6.35E-01 | 4.57E-05 | 7176                            |  |
| 3     | rs9917841  | 1.64E+08 | 7.92E-01       | N/A      | 8     | rs10111511 | 70063994 | 9.86E-01             | N/A      | -             | 5.18E-07 | 6.83E-01 | 1.08E-04 | 7177                            |  |
| 13    | rs953937   | 89320971 | 6.27E-01       | N/A      | 14    | rs12431784 | 84014544 | 2.97E-01             | N/A      | -             | 5.18E-07 | 1.34E-02 | 7.02E-08 | 7178                            |  |
| 13    | rs953937   | 89320971 | 6.27E-01       | N/A      | 14    | rs1449108  | 84016968 | 2.97E-01             | N/A      | -             | 5.18E-07 | 1.34E-02 | 7.02E-08 | 7179                            |  |
| 3     | rs11920780 | 1.36E+08 | 5.41E-01       | EPHB1    | 4     | rs2165289  | 1.18E+08 | 8.08E-01             | N/A      | -             | 5.18E-07 | 3.50E-02 | 5.50E-07 | 7180                            |  |
| 17    | rs917343   | 66910901 | 9.59E-01       | N/A      | 20    | rs6119407  | 31867302 | 6.93E-01             | CHMP4B   | -             | 5.18E-07 | 3.30E-01 | 8.55E-04 | 7181                            |  |
| 7     | rs3807827  | 8197116  | 8.52E-01       | ICA1     | 9     | rs7871964  | 23654696 | 5.09E-01             | N/A      | -             | 5.18E-07 | 4.88E-01 | 1.92E-04 | 7182                            |  |
| 13    | rs9316871  | 21759921 | 6.03E-01       | N/A      | 13    | rs7329652  | 46394115 | 2.14E-01             | N/A      | -             | 5.18E-07 | 5.90E-01 | 2.56E-04 | 7183                            |  |
| 3     | rs2133884  | 56821109 | 8.39E-01       | ARHGFE3  | 8     | rs6557594  | 22711133 | 2.99E-01             | PEBP4    | -             | 5.18E-07 | 1.21E-01 | 1.17E-06 | 7184                            |  |
| 3     | rs2657606  | 16151302 | 2.50E-01       | N/A      | 8     | rs7464161  | 1.4E+08  | 6.55E-01             | N/A      | -             | 5.18E-07 | 8.07E-01 | 1.50E-04 | 7185                            |  |
| 10    | rs2394616  | 71442025 | 7.95E-01       | N/A      | 13    | rs9576397  | 37381521 | 8.20E-01             | N/A      | -             | 5.19E-07 | 3.17E-01 | 5.39E-04 | 7186                            |  |
| 5     | rs4975727  | 2111143  | 5.84E-01       | N/A      | 20    | rs4814877  | 19564837 | 6.23E-01             | SLC24A3  | -             | 5.19E-07 | 8.55E-01 | 4.34E-05 | 7187                            |  |
| 9     | rs10815480 | 6902767  | 7.21E-01       | KDM4C    | 14    | rs1709860  | 31763855 | 6.29E-01             | N/A      | -             | 5.19E-07 | 4.47E-03 | 1.92E-02 | 7188                            |  |
| 2     | rs7604050  | 1.17E+08 | 6.14E-01       | N/A      | 2     | rs12619432 | 2.14E+08 | 6.33E-01             | SPAG16   | -             | 5.19E-07 | 4.17E-02 | 3.87E-07 | 7189                            |  |
| 10    | rs704082   | 84253897 | 3.21E-01       | NRG3     | 13    | rs9573305  | 73293493 | 3.29E-01             | KLF12    | -             | 5.19E-07 | 4.85E-01 | 3.90E-05 | 7190                            |  |
| 10    | rs7079799  | 14146320 | 2.45E-01       | FRMD4A   | 12    | rs2263487  | 45537094 | 2.68E-02             | N/A      | -             | 5.19E-07 | 9.17E-01 | 1.58E-04 | 7191                            |  |
| 12    | rs9435     | 22734474 | 9.98E-01       | ETNK1    | 13    | rs658343   | 55025869 | 8.40E-01             | N/A      | -             | 5.19E-07 | 8.62E-01 | 2.85E-05 | 7192                            |  |
| 2     | rs4852124  | 2.4E+08  | 4.24E-01       | N/A      | 5     | rs32598    | 83478888 | 4.50E-01             | EDIL3    | -             | 5.19E-07 | 7.08E-01 | 7.22E-06 | 7193                            |  |
| 5     | rs1505074  | 82293747 | 8.76E-01       | N/A      | 5     | rs1833710  | 1.48E+08 | 9.49E-01             | HTR4     | -             | 5.19E-07 | 9.91E-01 | 4.49E-05 | 7194                            |  |
| 4     | rs13138512 | 1.2E+08  | 7.79E-01       | SYNPO2   | 13    | rs7321643  | 55956435 | 9.73E-01             | N/A      | -             | 5.19E-07 | 4.47E-01 | 1.38E-05 | 7195                            |  |
| 4     | rs13138512 | 1.2E+08  | 7.79E-01       | SYNPO2   | 13    | rs7994712  | 55952332 | 9.73E-01             | N/A      | -             | 5.19E-07 | 4.47E-01 | 1.38E-05 | 7196                            |  |
| 6     | rs13192959 | 53608748 | 2.32E-01       | KLHL31   | 2     | rs2674075  | 59649524 | 6.05E-01             | N/A      | -             | 5.19E-07 | N/A      | N/A      | 7197                            |  |
| 6     | rs1326543  | 53605181 | 2.32E-01       | KLHL31   | 2     | rs2674075  | 59649524 | 6.05E-01             | N/A      | -             | 5.19E-07 | N/A      | N/A      | 7198                            |  |
| 17    | rs105025   | 39342967 | 3.05E-01       | MPP2     | 18    | rs4891904  | 66962989 | 9.00E-01             | N/A      | -             | 5.19E-07 | 5.25E-02 | 2.56E-07 | 7199                            |  |
| 7     | rs8180796  | 73472036 | 4.84E-01       | CLIP2    | 16    | rs4787384  | 26633023 | 9.94E-01             | N/A      | -             | 5.19E-07 | 6.86E-01 | 2.79E-04 | 7200                            |  |
| 5     | rs2279980  | 57949136 | 5.54E-01       | RAB3C    | 14    | rs4904964  | 92169620 | 6.24E-01             | RIN3     | -             | 5.19E-07 | 7.98E-01 | 2.65E-04 | 7201                            |  |
| 6     | rs9370225  | 53654545 | 9.52E-02       | KLHL31   | 5     | rs32652    | 1.19E+08 | 1.50E-01             | TNFAIP8  | -             | 5.19E-07 | 2.28E-02 | 4.82E-07 | 7202                            |  |
| 3     | rs3749404  | 31720390 | 1.77E-01       | N/A      | 18    | rs8082866  | 3415211  | 3.88E-01             | TGIF1    | -             | 5.19E-07 | 2.44E-02 | 1.08E-02 | 7203                            |  |
| 1     | rs851121   | 18960352 | 5.40E-01       | PAX7     | 14    | rs1168987  | 35467431 | 3.15E-01             | N/A      | -             | 5.19E-07 | 1.23E-01 | 4.55E-03 | 7204                            |  |
| 3     | rs1826351  | 99269950 | 3.42E-02       | OR5AC2   | 11    | rs7949197  | 97143884 | 9.52E-01             | N/A      | -             | 5.19E-07 | 3.66E-01 | 2.61E-05 | 7205                            |  |
| 5     | rs10491237 | 10965382 | 4.28E-01       | N/A      | 8     | rs1994370  | 62303895 | 6.96E-01             | N/A      | -             | 5.19E-07 | 5.01E-01 | 4.50E-05 | 7206                            |  |
| 9     | rs10760932 | 1.05E+08 | 5.61E-01       | CYLC2    | 19    | rs4006658  | 6573352  | 9.69E-01             | N/A      | -             | 5.19E-07 | 6.11E-01 | 1.97E-04 | 7207                            |  |
| 7     | rs2192017  | 1.22E+08 | 8.28E-01       | CADPS2   | 7     | rs1024144  | 1.38E+08 | 7.83E-01             | ATP6V0A4 | -             | 5.19E-07 | 8.85E-01 | 5.07E-05 | 7208                            |  |
| 8     | rs2737375  | 31179757 | 6.46E-02       | N/A      | 20    | rs1345368  | 15458343 | 6.95E-01             | MACROD2  | -             | 5.20E-07 | 2.73E-02 | 1.36E-02 | 7209                            |  |
| 9     | rs10780298 | 81084044 | 4.79E-01       | N/A      | 17    | rs2319453  | 47208020 | 8.73E-01             | CA10     | -             | 5.20E-07 | 2.24E-01 | 4.91E-06 | 7210                            |  |
| 6     | rs9398455  | 98122073 | 7.52E-01       | N/A      | 21    | rs10222063 | 41216672 | 7.06E-01             | N/A      | -             | 5.20E-07 | 5.56E-01 | 4.99E-04 | 7211                            |  |
| 7     | rs3808035  | 1.03E+08 | 8.82E-03       | RELN     | 22    | rs5761894  | 25718110 | 7.83E-03             | N/A      | -             | 5.20E-07 | 3.83E-01 | 3.33E-03 | 7212                            |  |
| 3     | rs999764   | 23486342 | 5.20E-01       | UBE2E2   | 19    | rs1261052  | 10210118 | 9.39E-02             | S1PR2    | -             | 5.20E-07 | 2.45E-01 | 2.36E-06 | 7213                            |  |
| 3     | rs342913   | 1.48E+08 | 6.17E-02       | PLSCR5   | 5     | rs1947202  | 1.8E+08  | 5.93E-01             | N/A      | -             | 5.20E-07 | 7.70E-01 | 5.04E-05 | 7214                            |  |
| 4     | rs13111136 | 30345822 | 1.25E-01       | PCDH7    | 4     | rs17651643 | 16945438 | 6.10E-02             | MYO10    | -             | 5.20E-07 | N/A      | N/A      | 7215                            |  |
| 5     | rs890779   | 1.17E+08 | 9.40E-01       | N/A      | 7     | rs10807744 | 71279200 | 1.46E-01             | CALN1    | -             | 5.20E-07 | 3.73E-01 | 3.51E-05 | 7216                            |  |
| 4     | rs2290847  | 1.51E+08 | 6.60E-01       | LRBA     | 5     | rs4260724  | 1.52E+08 | 2.46E-01             | N/A      | -             | 5.20E-07 | 4.91E-01 | 1.17E-05 | 7217                            |  |
| 8     | rs2927345  | 6718913  | 7.45E-01       | DEFB1    | 11    | rs6483763  | 21302450 | 2.80E-02             | NELL1    | -             | 5.20E-07 | 6.04E-01 | 4.42E-04 | 7218                            |  |
| 8     | rs5743463  | 6719584  | 7.45E-01       | DEFB1    | 11    | rs6483763  | 21302450 | 2.80E-02             | NELL1    | -             | 5.20E-07 | 6.04E-01 | 4.42E-04 | 7219                            |  |
| 2     | rs6545648  | 57511448 | 3.54E-01       | N/A      | 2     | rs7566185  | 59945105 | 3.77E-02             | N/A      | -             | 5.20E-07 | 5.76E-03 | 1.07E-08 | 7220                            |  |
| 2     | rs1177265  | 61192336 | 9.23E-02       | KIAA1841 | 8     | rs2726555  | 59947966 | 8.90E-01             | TOX      | -             | 5.20E-07 | 9.72E-02 | 2.54E-03 | 7221                            |  |
| 2     | rs896637   | 2.09E+08 | 5.59E-01       | N/A      | 7     | rs6461503  | 20527521 | 1.19E-01             | N/A      | -             | 5.20E-07 | 4.05E-01 | 9.36E-04 | 7222                            |  |
| 1     | rs1134647  | 2.13E+08 | 8.01E-01       | SMYD2    | 13    | rs12584295 | 1.08E+08 | 7.00E-02             | N/A      | -             | 5.20E-07 | 4.84E-01 | 4.13E-04 | 7223                            |  |
| 1     | rs12124666 | 2.13E+08 | 8.01E-01       | SMYD2    | 13    | rs12584295 | 1.08E+08 | 7.00E-02             | N/A      | -             | 5.20E-07 | 4.84E-01 | 4.13E-04 | 7224                            |  |
| 8     | rs11203975 | 18664773 | 3.50E-02       | PSD3     | 11    | rs11220151 | 1.25E+08 | 5.18E-01             | CHEK1    | -             | 5.21E-07 | 7.99E-01 | 5.38E-05 | 7225                            |  |
| 9     | rs10983400 | 1.19E+08 | 4.62E-01       | ASTN2    | 12    | rs7978850  | 10613852 | 4.94E-01             | KLRA1    | -             | 5.21E-07 | 8.35E-01 | 1.25E-04 | 7226                            |  |
| 9     | rs10868248 | 71703997 | 9.40E-01       | C9orf135 | 12    | rs1054637  | 21576375 | 8.40E-01             | GOLT1B   | -             | 5.21E-07 | 4.28E-01 | 8.30E-06 | 7227                            |  |
| 2     | rs12614028 | 10341404 | 2.68E-01       | HPICAL1  | 16    | rs30935    | 53878002 | 7.36E-01             | N/A      | -             | 5.21E-07 | 9.02E-01 | 3.68E-05 | 7228                            |  |
| 8     | rs551496   | 93555883 | 9.54E-01       | N/A      | 13    | rs1359390  | 77682214 | 5.97E-01             | N/A      | -             | 5.21E-07 | 4.69E-01 | 5.24E-05 | 7229                            |  |
| 1     | rs2873096  | 53802444 | 4.99E-01       | GLIS1    | 4     | rs11725723 | 1.11E+08 | 5.94E-01             | N/A      | -             | 5.21E-07 | 7.06E-01 | 2.32E-04 | 7230                            |  |
| 4     | rs1978916  | 80666284 | 5.89E-02       | N/A      | 7     | rs2390961  | 24266172 | 2.98E-01             | N/A      | -             | 5.21E-07 | 1.32E-01 | 2.67E-06 | 7231                            |  |
| 2     | rs1430642  | 79721176 | 7.19E-01       | CTNN/A2  | 7     | rs4376436  | 94244361 | 7.29E-01             | N/A      | -             | 5.21E-07 | 5.36E-01 | 4.57E-05 | 7232                            |  |
| 1     | rs2492604  | 42026375 | 9.89E-01       | HIVEP3   | 15    | rs8025614  | 39930204 | 3.55E-01             | PLA2G4B  | -             | 5.21E-07 | 5.87E-01 | 3.48E-04 | 7233                            |  |
| 1     | rs978528   | 17222385 | 2.63E-01       | ATP13A2  | 11    | rs1574128  | 1.28E+08 | 9.77E-01             | KCNJ1    | -             | 5.21E-07 | 6.16E-01 | 1.59E-05 | 7234                            |  |
| 7     | rs206984   | 70518586 | 4.65E-01       | WBSCR17  | 7     | rs12707374 | 1.37E+08 | 6.77E-01             | CREB3L2  | -             | 5.21E-07 | 6.88E-01 | 1.62E-04 | 7235                            |  |
| 1     | rs12022475 | 80075562 | 4.18E-02       | N/A      | 10    | rs7086377  | 3586526  | 5.88E-01             | N/A      | -             | 5.21E-07 | 3.11E-01 | 9.82E-06 | 7236                            |  |
| 2     | rs4669725  | 11448167 | 6.07E-01       | N/A      | 3     | rs9883965  | 1.66E+08 | 4.54E-01             | SI       | -             | 5.21E-07 | 4.57E-01 | 2.55E-03 | 7237                            |  |
| 2     | rs7598757  | 77781822 | 6.62E-01       | N/A      | 18    | rs12964454 | 70389710 | 2.81E-01             | CNDP1    | -             | 5.21E-07 | 2.40E-01 | 8.95E-04 | 7238                            |  |
|       |            |          |                |          |       |            |          |                      |          |               |          |          |          |                                 |  |

| SNP A |            |          |                |           | SNP B |            |          |                    |          | Interaction P |          |          | Ranking  | Cluster in top 100 interactions |
|-------|------------|----------|----------------|-----------|-------|------------|----------|--------------------|----------|---------------|----------|----------|----------|---------------------------------|
| CHR   | SNP        | Location | gle locus P va | Gene      | CHR   | SNP        | Location | single locus P val | Gene     | MHC region    | Stage 1  | Stage 2  | Combined |                                 |
| 12    | rs2111343  | 95979264 | 9.44E-01       | N/A       | 15    | rs1480086  | 96446213 | 5.97E-01           | N/A      | -             | 5.24E-07 | 5.36E-01 | 3.06E-05 | 7279                            |
| 10    | rs9663977  | 4507381  | 3.48E-01       | N/A       | 16    | rs1259827  | 81163012 | 3.75E-01           | N/A      | -             | 5.24E-07 | 2.22E-01 | 9.60E-07 | 7280                            |
| 12    | rs53025    | 29565117 | 7.82E-01       | N/A       | 13    | rs7981459  | 1.05E+08 | 4.55E-01           | N/A      | -             | 5.24E-07 | 4.21E-01 | 1.28E-05 | 7281                            |
| 7     | rs11983118 | 9047577  | 9.64E-01       | N/A       | 7     | rs2214740  | 46906589 | 9.74E-01           | N/A      | -             | 5.24E-07 | 8.91E-02 | 2.96E-03 | 7282                            |
| 7     | rs10279330 | 35613505 | 3.30E-01       | N/A       | 19    | rs4805602  | 35897140 | 2.21E-01           | N/A      | -             | 5.24E-07 | 2.99E-01 | 1.32E-03 | 7283                            |
| 6     | rs6941942  | 1.11E+08 | 4.58E-01       | N/A       | 1     | rs10798126 | 1.86E+08 | 8.20E-01           | N/A      | -             | 5.24E-07 | 3.83E-01 | 7.56E-04 | 7284                            |
| 2     | rs174253   | 1.6E+08  | 9.19E-01       | BAZ2B     | 2     | rs514898   | 2.2E+08  | 2.70E-01           | N/A      | -             | 5.24E-07 | 5.31E-01 | 3.88E-05 | 7285                            |
| 4     | rs557785   | 1.12E+08 | 1.57E-02       | ENPEP     | 8     | rs1994792  | 96378313 | 6.70E-01           | N/A      | -             | 5.24E-07 | N/A      | N/A      | 7286                            |
| 9     | rs7042130  | 77281975 | 4.69E-01       | N/A       | 13    | rs7999126  | 86769337 | 9.01E-01           | N/A      | -             | 5.24E-07 | N/A      | N/A      | 7287                            |
| 9     | rs7853037  | 7007391  | 6.43E-01       | KDM4C     | 13    | rs7982669  | 97339220 | 4.65E-01           | N/A      | -             | 5.25E-07 | 9.51E-01 | 1.33E-04 | 7288                            |
| 6     | rs6918423  | 27302051 | 6.03E-01       | N/A       | 15    | rs813299   | 29225595 | 8.06E-01           | N/A      | MHC           | 5.25E-07 | 9.62E-01 | 7.22E-05 | 7289                            |
| 6     | rs3800312  | 27318593 | 6.03E-01       | PRSS16    | 15    | rs813299   | 29225595 | 8.06E-01           | N/A      | MHC           | 5.25E-07 | 9.95E-01 | 1.11E-04 | 7290                            |
| 10    | rs10785907 | 91563972 | 3.28E-01       | N/A       | 16    | rs17192054 | 6530267  | 3.59E-01           | A2BP1    | -             | 5.25E-07 | 6.01E-01 | 2.60E-04 | 7291                            |
| 1     | rs1004766  | 37597095 | 9.31E-01       | N/A       | 2     | rs11687313 | 2.01E+08 | 8.42E-01           | N/A      | -             | 5.25E-07 | 9.98E-01 | 4.72E-05 | 7292                            |
| 12    | rs1354156  | 1.14E+08 | 1.51E-02       | TBX3      | 17    | rs11655555 | 34863649 | 5.95E-02           | MED1     | -             | 5.25E-07 | 8.48E-03 | 8.85E-08 | 7293                            |
| 18    | rs1546564  | 32290294 | 4.79E-01       | FHOD3     | 19    | rs919271   | 57360226 | 2.20E-01           | ZNF836   | -             | 5.25E-07 | 8.64E-01 | 1.11E-04 | 7294                            |
| 6     | rs2295261  | 47344839 | 6.30E-01       | TNFRSF21  | 10    | rs7074064  | 88673102 | 9.77E-01           | BMPR1A   | -             | 5.25E-07 | 9.72E-01 | 3.59E-04 | 7295                            |
| 6     | rs4342445  | 1.6E+08  | 6.60E-01       | SOD2      | 12    | rs7133563  | 5308881  | 6.30E-01           | N/A      | -             | 5.25E-07 | 5.36E-01 | 2.66E-05 | 7296                            |
| 6     | rs9365085  | 1.6E+08  | 6.60E-01       | SOD2      | 12    | rs7133563  | 5308881  | 6.30E-01           | N/A      | -             | 5.25E-07 | 5.36E-01 | 2.66E-05 | 7297                            |
| 2     | rs10169420 | 1.83E+08 | 4.31E-01       | N/A       | 12    | rs1846035  | 82545653 | 9.72E-01           | N/A      | -             | 5.25E-07 | 4.83E-01 | 2.86E-05 | 7298                            |
| 17    | rs8077733  | 28043066 | 3.83E-01       | MYO1D     | 18    | rs3911593  | 46436326 | 7.35E-01           | MAPK4    | -             | 5.25E-07 | 4.79E-01 | 1.16E-03 | 7299                            |
| 7     | rs4724070  | 41749884 | 3.09E-01       | LOC285954 | 17    | rs895690   | 70296244 | 2.37E-01           | SLC9A3R1 | -             | 5.25E-07 | 5.95E-01 | 4.78E-04 | 7300                            |
| 3     | rs4683070  | 45174624 | 4.12E-01       | CDCP1     | 20    | rs12329405 | 14281754 | 5.20E-02           | MACROD2  | -             | 5.25E-07 | 6.33E-01 | 3.60E-05 | 7301                            |
| 7     | rs6960014  | 14307870 | 4.40E-01       | DGKB      | 20    | rs2697515  | 26033338 | 6.54E-01           | FAM182A  | -             | 5.25E-07 | 8.07E-01 | 6.76E-05 | 7302                            |
| 2     | rs2031028  | 29917297 | 6.14E-01       | N/A       | 4     | rs1992981  | 27328888 | 6.94E-01           | N/A      | -             | 5.25E-07 | 9.29E-01 | 8.99E-05 | 7303                            |
| 9     | rs2148600  | 26562236 | 4.99E-01       | N/A       | 11    | rs11215431 | 1.15E+08 | 6.38E-01           | CADM1    | -             | 5.25E-07 | 4.80E-01 | 5.07E-04 | 7304                            |
| 11    | rs1442717  | 20122076 | 8.67E-01       | DBX1      | 13    | rs10492482 | 1.09E+08 | 2.55E-01           | N/A      | -             | 5.25E-07 | 5.81E-01 | 1.77E-05 | 7305                            |
| 1     | rs7532302  | 1.55E+08 | 1.39E-01       | NES       | 7     | rs6466069  | 1.05E+08 | 9.94E-01           | PUS7     | -             | 5.25E-07 | 8.44E-01 | 2.91E-04 | 7306                            |
| 1     | rs7516314  | 89823419 | 1.10E-01       | LRRRC8B   | 7     | rs7793355  | 1.24E+08 | 2.39E-01           | N/A      | -             | 5.25E-07 | 4.03E-01 | 1.45E-03 | 7307                            |
| 5     | rs10477862 | 1.06E+08 | 8.56E-02       | N/A       | 12    | rs10506435 | 61930601 | 4.64E-01           | N/A      | -             | 5.25E-07 | 7.78E-01 | 4.17E-05 | 7308                            |
| 1     | rs3949904  | 62620678 | 4.41E-01       | N/A       | 4     | rs9992060  | 1.89E+08 | 5.12E-01           | N/A      | -             | 5.26E-07 | 1.30E-01 | 9.01E-03 | 7309                            |
| 9     | rs7855908  | 70706902 | 5.79E-01       | PIP5K1B   | 9     | rs4515651  | 90095083 | 2.25E-01           | N/A      | -             | 5.26E-07 | 2.79E-02 | 1.81E-07 | 7310                            |
| 3     | rs958144   | 89077362 | 4.21E-01       | N/A       | 17    | rs4796460  | 6131231  | 5.37E-01           | N/A      | -             | 5.26E-07 | 9.31E-01 | 4.32E-05 | 7311                            |
| 2     | rs6704827  | 41869279 | 6.25E-01       | N/A       | 12    | rs4931005  | 32036267 | 9.10E-01           | C12orf35 | -             | 5.26E-07 | 8.13E-01 | 2.37E-04 | 7312                            |
| 7     | rs13244987 | 1.57E+08 | 6.87E-01       | N/A       | 12    | rs7133582  | 1.16E+08 | 7.16E-01           | KSR2     | -             | 5.26E-07 | 6.64E-01 | 6.03E-05 | 7313                            |
| 12    | rs11052333 | 32994537 | 4.58E-01       | N/A       | 12    | rs11615997 | 1.28E+08 | 3.34E-01           | TMEM132D | -             | 5.26E-07 | 4.34E-01 | 6.20E-04 | 7314                            |
| 4     | rs633398   | 1.19E+08 | 2.43E-01       | NDST3     | 10    | rs4028374  | 16511634 | 8.46E-01           | PTER     | -             | 5.26E-07 | 8.12E-01 | 3.64E-04 | 7315                            |
| 6     | rs3752534  | 1.64E+08 | 2.08E-01       | N/A       | 17    | rs4794053  | 43124550 | 4.39E-01           | KPNB1    | -             | 5.26E-07 | 9.60E-02 | 5.15E-03 | 7316                            |
| 7     | rs798328   | 77733361 | 8.28E-01       | MAGI2     | 13    | rs9576336  | 37152339 | 7.39E-02           | TRPC4    | -             | 5.26E-07 | 2.12E-01 | 1.32E-06 | 7317                            |
| 14    | rs955119   | 85994405 | 1.04E-01       | N/A       | 19    | rs251896   | 44510231 | 2.01E-01           | SAMD4B   | -             | 5.26E-07 | 9.40E-01 | 3.56E-04 | 7318                            |
| 4     | rs1478095  | 1.32E+08 | 6.79E-01       | N/A       | 8     | rs372976   | 82634163 | 4.55E-01           | N/A      | -             | 5.26E-07 | N/A      | N/A      | 7319                            |
| 4     | rs1478095  | 1.32E+08 | 6.79E-01       | N/A       | 8     | rs396738   | 82634100 | 4.55E-01           | N/A      | -             | 5.26E-07 | N/A      | N/A      | 7320                            |
| 1     | rs4652753  | 1.81E+08 | 2.95E-01       | N/A       | 3     | rs184452   | 64125246 | 5.83E-01           | PRICKLE2 | -             | 5.26E-07 | 7.43E-01 | 1.57E-04 | 7321                            |
| 2     | rs2540100  | 59604268 | 7.95E-01       | N/A       | 3     | rs6439301  | 1.33E+08 | 8.79E-01           | MRPL3    | -             | 5.27E-07 | 1.94E-01 | 1.47E-06 | 7322                            |
| 9     | rs10124022 | 72472635 | 7.39E-01       | TRPM3     | 18    | rs1625796  | 28369416 | 9.26E-01           | N/A      | -             | 5.27E-07 | 3.23E-01 | 6.88E-06 | 7323                            |
| 19    | rs919803   | 35678944 | 1.57E-01       | N/A       | 22    | rs5769941  | 47928225 | 6.71E-02           | N/A      | -             | 5.27E-07 | 3.53E-01 | 1.23E-05 | 7324                            |
| 6     | rs4618489  | 85230221 | 9.25E-01       | N/A       | 4     | rs12506395 | 5975695  | 5.84E-01           | N/A      | -             | 5.27E-07 | 9.58E-01 | 7.16E-05 | 7325                            |
| 6     | rs9362053  | 85234736 | 9.25E-01       | N/A       | 4     | rs12506395 | 5975695  | 5.84E-01           | N/A      | -             | 5.27E-07 | 9.58E-01 | 7.16E-05 | 7326                            |
| 2     | rs6709502  | 30664428 | 9.17E-01       | CAPN13    | 11    | rs483058   | 1.16E+08 | 9.05E-01           | N/A      | -             | 5.27E-07 | 2.66E-01 | 1.59E-06 | 7327                            |
| 4     | rs7657164  | 1.69E+08 | 4.42E-01       | DDX60     | 15    | rs11633283 | 45664002 | 9.88E-01           | N/A      | -             | 5.27E-07 | 2.83E-01 | 7.27E-04 | 7328                            |
| 14    | rs11844935 | 30734018 | 5.71E-01       | HECTD1    | 18    | rs16943693 | 23314984 | 5.93E-03           | N/A      | -             | 5.27E-07 | 7.52E-01 | 1.24E-04 | 7329                            |
| 8     | rs4291239  | 1.03E+08 | 3.97E-01       | N/A       | 13    | rs7326356  | 71581505 | 1.62E-01           | N/A      | -             | 5.27E-07 | 5.05E-01 | 2.00E-05 | 7330                            |
| 5     | rs9327438  | 1.27E+08 | 5.38E-01       | MEGF10    | 7     | rs10225002 | 1.58E+08 | 2.26E-02           | PTPRN2   | -             | 5.27E-07 | 7.17E-01 | 2.41E-05 | 7331                            |
| 5     | rs9327438  | 1.27E+08 | 5.38E-01       | MEGF10    | 7     | rs10265411 | 1.58E+08 | 2.26E-02           | PTPRN2   | -             | 5.27E-07 | 7.17E-01 | 2.41E-05 | 7332                            |
| 6     | rs942723   | 1.65E+08 | 8.26E-01       | N/A       | 2     | rs13387662 | 34016918 | 2.26E-01           | N/A      | -             | 5.27E-07 | 9.73E-01 | 5.39E-05 | 7333                            |
| 6     | rs6932930  | 34785081 | 2.64E-01       | C6orf106  | 5     | rs3010240  | 72045895 | 1.43E-01           | N/A      | MHC           | 5.27E-07 | 1.39E-02 | 1.65E-06 | 7334                            |
| 7     | rs7807486  | 8775211  | 7.61E-01       | NXPH1     | 15    | rs2007355  | 49934917 | 6.32E-02           | TMOD3    | -             | 5.28E-07 | 3.30E-01 | 7.80E-06 | 7335                            |
| 5     | rs2526150  | 1.35E+08 | 5.12E-01       | FBXL21    | 15    | rs12148733 | 70622069 | 9.56E-01           | ARIH1    | -             | 5.28E-07 | 6.41E-02 | 3.27E-07 | 7336                            |
| 3     | rs259489   | 21916263 | 1.63E-01       | N/A       | 12    | rs1080902  | 41884180 | 7.83E-01           | N/A      | -             | 5.28E-07 | 8.53E-01 | 4.36E-05 | 7337                            |
| 1     | rs10863725 | 2.07E+08 | 8.94E-01       | N/A       | 2     | rs10191044 | 18579682 | 1.89E-01           | RDH14    | -             | 5.28E-07 | 8.79E-01 | 6.12E-05 | 7338                            |
| 1     | rs10863725 | 2.07E+08 | 8.94E-01       | N/A       | 2     | rs10495687 | 18580060 | 1.89E-01           | RDH14    | -             | 5.28E-07 | 8.79E-01 | 6.12E-05 | 7339                            |
| 1     | rs7552260  | 30624265 | 7.04E-01       | N/A       | 18    | rs657773   | 55097571 | 7.94E-01           | RAX      | -             | 5.28E-07 | 2.44E-01 | 2.35E-03 | 7340                            |
| 2     | rs7586962  | 2.15E+08 | 8.48E-02       | BARD1     | 7     | rs12698902 | 69475255 | 2.51E-01           | AUTS2    | -             | 5.28E-07 | 8.06E-01 | 1.65E-04 | 7341                            |
| 2     | rs2304674  | 2.39E+08 | 1.83E-01       | PER2      | 20    | rs17744801 | 21422355 | 4.36E-01           | NKX2-2   | -             | 5.28E-07 | 7.09E-01 | 4.61E-05 | 7342                            |
| 3     | rs6443863  | 1.85E+08 | 6.71E-01       | MCF2L2    | 20    | rs2024594  | 46951201 | 7.98E-01           | N/A      | -             | 5.28E-07 | 8.43E-01 | 1.23E-04 | 7343                            |
| 1     | rs1466613  | 79409914 | 4.91E-01       | N/A       | 4     | rs2626608  | 1.73E+08 | 5.00E-01           | GALNTL6  | -             | 5.28E-07 | 3.57E-01 | 2.44E-06 | 7344                            |
| 2     | rs341605   | 44917691 | 3.10E-02       | N/A       | 15    | rs2602141  | 41511938 | 1.58E-01           | TP53BP1  | -             | 5.28E-07 | 5.03E-01 | 7.74E-04 | 7345                            |
| 4     | rs2310129  | 29711586 | 3.44E-01       | N/A       | 18    | rs3902020  | 48065150 | 7.07E-01           | N/A      | -             | 5.28E-07 | 6.07E-01 | 2.23E-04 | 7346                            |
| 12    | rs7976486  | 74660715 | 3.38E-01       | N/A       | 13    | rs1119911  | 30979769 | 7.70E-01           | N/A      | -             | 5.28E-07 | 9.19E-02 | 2.40E-03 | 7347                            |
| 8     | rs477516   | 16758362 | 9.63E-01       | N/A       | 9     | rs1413258  | 20166246 | 5.03E-01           | N/A      | -             | 5.28E-07 | 4.05E-01 | 1.06E-03 | 7348                            |
| 3     | rs6786950  | 903456   | 9.05E-01       | N/A       | 7     | rs2402852  | 1.26E+08 | 3.71E-01           | GRM8     | -             | 5.28E-07 | 8.15E-01 | 1.60E-04 | 7349                            |
| 4     | rs13149605 | 1.88E+08 | 4.46E-01       | N/A       | 9     | rs1571231  | 37401834 | 1.64E-01           | GRHPR    | -             | 5.29E-07 | 6.72E-01 | 9.61E-05 | 7350                            |
| 12    | rs10506937 | 85825624 | 7.99E-01       | N/A       | 16    | rs4243218  | 80458129 | 5.86E-01           | PLCG2    | -             | 5.29E-07 | 7.03E-01 | 3.43E-04 | 7351                            |
| 10    | rs2387667  | 1420761  | 1.95E-01       | ADARB2    | 17    | rs8078179  | 14856327 | 9.16E-01           | N/A      | -             | 5.29E-07 | 7.98E-01 | 2.52E-   |                                 |

| SNP A |            |          |                 |         | SNP B |            |           |                 |          | MHC region | Interaction P |          |            | Ranking | Cluster in top 100 interactions |
|-------|------------|----------|-----------------|---------|-------|------------|-----------|-----------------|----------|------------|---------------|----------|------------|---------|---------------------------------|
| CHR   | SNP        | Location | gle locus P val | Gene    | CHR   | SNP        | Location  | gle locus P val | Gene     |            | Stage 1       | Stage 2  | Combined   |         |                                 |
| 3     | rs3905902  | 12000779 | 6.46E-01        | N/A     | 10    | s11254053  | 16607306  | 8.69E-01        | PTER     | -          | 5.31E-07      | 3.89E-01 | 4.55E-04   | 7391    |                                 |
| 3     | rs9857596  | 6571774  | 6.65E-01        | N/A     | 4     | rs7691785  | 1.66E+08  | 2.37E-01        | N/A      | -          | 5.31E-07      | 1.09E-02 | 1.87E-02   | 7392    |                                 |
| 8     | rs7007064  | 63261986 | 5.07E-01        | N/A     | 9     | rs3118853  | 89483169  | 8.61E-02        | DAPK1    | -          | 5.31E-07      | 2.62E-01 | 1.47E-03   | 7393    |                                 |
| 10    | rs2025468  | 10656491 | 3.55E-01        | N/A     | 19    | rs425655   | 52063456  | 2.78E-01        | AP2S1    | -          | 5.31E-07      | 5.72E-01 | 3.29E-04   | 7394    |                                 |
| 10    | rs2025468  | 10656491 | 3.55E-01        | N/A     | 19    | rs7259209  | 52095694  | 2.78E-01        | GRF1     | -          | 5.31E-07      | 5.72E-01 | 3.29E-04   | 7395    |                                 |
| 8     | rs11203713 | 15486984 | 4.01E-01        | TUSC3   | 12    | rs353897   | 1.17E+08  | 6.39E-01        | TAOK3    | -          | 5.32E-07      | 1.07E-01 | 5.84E-03   | 7396    |                                 |
| 4     | rs13150890 | 1.9E+08  | 8.91E-01        | N/A     | 5     | rs980631   | 72927514  | 3.41E-01        | UTP15    | -          | 5.32E-07      | 3.81E-01 | 8.80E-06   | 7397    |                                 |
| 5     | rs10941232 | 35090396 | 7.53E-02        | PRLR    | 8     | rs1487233  | 1.28E+08  | 1.03E-01        | N/A      | -          | 5.32E-07      | 1.21E-01 | 1.97E-06   | 7398    |                                 |
| 13    | rs9543825  | 74465245 | 1.35E-03        | N/A     | 18    | rs17621616 | 22748311  | 4.63E-01        | CHST9    | -          | 5.32E-07      | 5.77E-01 | 4.39E-05   | 7399    |                                 |
| 4     | rs1966546  | 31036506 | 8.11E-01        | N/A     | 11    | rs2640093  | 90984244  | 7.29E-01        | N/A      | -          | 5.32E-07      | N/A      | N/A        | 7400    |                                 |
| 2     | rs1533971  | 35990142 | 1.23E-01        | N/A     | 11    | s11042978  | 2154994   | 3.22E-01        | N/A      | -          | 5.32E-07      | 2.71E-01 | 9.13E-04   | 7401    |                                 |
| 3     | rs1997061  | 1.72E+08 | 2.64E-01        | PRKCI   | 4     | rs2029886  | 1.22E+08  | 1.34E-01        | N/A      | -          | 5.32E-07      | 5.58E-01 | 2.58E-05   | 7402    |                                 |
| 13    | rs17233815 | 92156875 | 7.20E-01        | GPC5    | 18    | rs2291172  | 63333372  | 5.45E-02        | N/A      | -          | 5.32E-07      | 8.81E-01 | 9.34E-05   | 7403    |                                 |
| 9     | rs1854442  | 23689886 | 9.25E-01        | N/A     | 14    | rs4899635  | 76602425  | 2.51E-01        | N/A      | -          | 5.32E-07      | 5.51E-02 | 7.43E-07   | 7404    |                                 |
| 4     | rs874950   | 32976358 | 9.07E-01        | N/A     | 11    | rs2109681  | 22770039  | 8.58E-02        | GAS2     | -          | 5.32E-07      | 7.15E-02 | 4.63E-06   | 7405    |                                 |
| 2     | rs16986865 | 19752687 | 7.87E-01        | N/A     | 13    | rs17638544 | 41854621  | 7.32E-01        | N/A      | -          | 5.32E-07      | 2.04E-01 | 3.10E-06   | 7406    |                                 |
| 6     | rs6910409  | 1.23E+08 | 3.45E-01        | CLVS2   | 1     | rs17596572 | 1.5E+08   | 1.20E-01        | HRNR     | -          | 5.32E-07      | 2.35E-01 | 1.01E-03   | 7407    |                                 |
| 5     | rs1345592  | 1.69E+08 | 1.10E-01        | SLIT3   | 9     | rs1444832  | 74497539  | 1.90E-01        | TMC1     | -          | 5.32E-07      | 2.21E-01 | 6.11E-04   | 7408    |                                 |
| 3     | rs6798021  | 5444862  | 1.90E-01        | N/A     | 8     | rs7834601  | 1.43E+08  | 6.16E-01        | N/A      | -          | 5.32E-07      | 2.86E-01 | 4.52E-04   | 7409    |                                 |
| 4     | rs7681982  | 59940049 | 7.61E-01        | N/A     | 7     | rs17165845 | 93360865  | 5.99E-01        | GNMT1    | -          | 5.32E-07      | 7.27E-01 | 1.64E-04   | 7410    |                                 |
| 14    | rs1890723  | 48512327 | 8.65E-01        | N/A     | 16    | s10514506  | 79278578  | 9.46E-01        | CDYL2    | -          | 5.33E-07      | 7.88E-01 | 1.40E-05   | 7411    |                                 |
| 3     | rs1461820  | 28766590 | 7.62E-01        | N/A     | 5     | rs32128    | 11396384  | 2.81E-01        | CTNND2   | -          | 5.33E-07      | 3.03E-01 | 1.58E-06   | 7412    |                                 |
| 3     | rs2630243  | 1.95E+08 | 7.53E-01        | N/A     | 20    | s12479923  | 38039524  | 2.06E-01        | N/A      | -          | 5.33E-07      | 1.64E-02 | 3.99E-03   | 7413    |                                 |
| 7     | rs7807056  | 8774929  | 7.61E-01        | NXPH1   | 15    | rs2007355  | 49934917  | 6.32E-02        | TMOD3    | -          | 5.33E-07      | 3.72E-01 | 9.51E-06   | 7414    |                                 |
| 16    | rs7190485  | 14048591 | 7.16E-01        | N/A     | 19    | rs7250902  | 768708    | 8.58E-01        | N/A      | -          | 5.33E-07      | 7.46E-01 | 1.31E-04   | 7415    |                                 |
| 6     | rs9277027  | 33106216 | 3.69E-01        | N/A     | 14    | rs4540991  | 26620498  | 2.14E-02        | N/A      | MHC        | 5.33E-07      | 2.82E-01 | 2.35E-03   | 7416    |                                 |
| 14    | rs7148194  | 1.04E+08 | 9.05E-01        | KIF26A  | 17    | rs4793006  | 39045489  | 3.83E-01        | N/A      | -          | 5.33E-07      | 5.68E-01 | 1.78E-05   | 7417    |                                 |
| 6     | rs1310267  | 33414772 | 3.22E-01        | DAXX    | 2     | rs1344936  | 12167200  | 8.58E-01        | N/A      | MHC        | 5.33E-07      | 8.30E-01 | 1.23E-04   | 7418    |                                 |
| 6     | rs567513   | 86060923 | 8.10E-01        | N/A     | 9     | s11265905  | 91267966  | 5.32E-01        | SEMA4D   | -          | 5.33E-07      | 8.61E-01 | 1.07E-04   | 7419    |                                 |
| 19    | rs17833971 | 38620583 | 9.68E-01        | PEPD    | 19    | rs16975865 | 47702683  | 3.29E-01        | CEACAM1  | -          | 5.33E-07      | 5.43E-01 | 3.24E-05   | 7420    |                                 |
| 8     | rs7002130  | 1.39E+08 | 2.35E-01        | N/A     | 10    | rs7072336  | 1.04E+08  | 7.69E-01        | NOLC1    | -          | 5.33E-07      | 7.26E-01 | 2.23E-04   | 7421    |                                 |
| 5     | rs294039   | 1.03E+08 | 9.72E-01        | N/A     | 10    | rs4451642  | 1.13E+08  | 5.16E-01        | N/A      | -          | 5.33E-07      | N/A      | N/A        | 7422    |                                 |
| 16    | rs17287570 | 16062604 | 1.95E-01        | ABCC1   | 9     | rs1056143  | 13926488  | 8.03E-01        | PODNL1   | -          | 5.33E-07      | 5.26E-01 | 8.16E-04   | 7423    |                                 |
| 1     | rs2576241  | 2.15E+08 | 7.10E-01        | ESRRG   | 19    | rs7020062  | 1.14E+08  | 8.71E-01        | N/A      | -          | 5.33E-07      | 7.77E-01 | 6.57E-05   | 7424    |                                 |
| 15    | rs10152225 | 99780180 | 3.42E-01        | PCSK6   | 21    | rs8128163  | 39211000  | 4.81E-01        | N/A      | -          | 5.34E-07      | 7.10E-01 | 2.47E-04   | 7425    |                                 |
| 16    | rs7500355  | 84634601 | 7.85E-01        | N/A     | 17    | rs4795494  | 22501836  | 9.47E-01        | N/A      | -          | 5.34E-07      | 2.06E-01 | 1.77E-03   | 7426    |                                 |
| 3     | rs6549383  | 71349575 | 2.78E-01        | FOXP1   | 14    | rs2895811  | 199203695 | 1.13E-01        | HHP1L1   | -          | 5.34E-07      | 3.23E-01 | 7.23E-06   | 7427    |                                 |
| 5     | rs149352   | 94224367 | 7.77E-01        | MCTP1   | 8     | rs997258   | 1.46E+08  | 2.94E-01        | N/A      | -          | 5.34E-07      | 2.07E-01 | 7.41E-04   | 7428    |                                 |
| 11    | rs7936604  | 82514027 | 8.27E-01        | N/A     | 15    | s12915033  | 70431715  | 6.37E-01        | HEXA     | -          | 5.34E-07      | 5.65E-01 | 1.10E-05   | 7429    |                                 |
| 7     | rs9641392  | 77861948 | 2.83E-02        | MAGI2   | 12    | rs1049376  | 26382742  | 5.85E-01        | ITPR2    | -          | 5.34E-07      | 9.72E-01 | 3.31E-04   | 7430    |                                 |
| 2     | rs7592322  | 35930844 | 1.76E-01        | N/A     | 19    | s12610468  | 9850470   | 9.36E-01        | OLFM2    | -          | 5.34E-07      | 5.50E-01 | 6.36E-06   | 7431    |                                 |
| 7     | rs7789227  | 12089416 | 2.68E-01        | N/A     | 7     | rs6460701  | 71062107  | 5.36E-01        | CALN1    | -          | 5.34E-07      | 5.00E-01 | 9.62E-04   | 7432    |                                 |
| 2     | rs12469242 | 15892005 | 8.01E-01        | N/A     | 10    | rs3858284  | 88520461  | 1.99E-01        | BMPR1A   | -          | 5.34E-07      | 9.14E-01 | 2.24E-04   | 7433    |                                 |
| 15    | rs12324434 | 63501727 | 5.02E-01        | CCPG1   | 20    | rs4401268  | 11893421  | 4.17E-01        | N/A      | -          | 5.34E-07      | 9.51E-01 | 1.65E-04   | 7434    |                                 |
| 6     | rs9374809  | 1.2E+08  | 7.48E-02        | N/A     | 1     | rs749390   | 1.89E+08  | 4.35E-02        | N/A      | -          | 5.34E-07      | 5.13E-01 | 1.13E-05   | 7435    |                                 |
| 1     | rs6677529  | 1.61E+08 | 7.01E-01        | NOS1AP  | 22    | rs713821   | 25059005  | 1.71E-01        | N/A      | -          | 5.35E-07      | 1.55E-01 | 5.71E-07   | 7436    |                                 |
| 4     | rs7670291  | 39366980 | 4.57E-01        | UBE2K   | 4     | rs1498020  | 1.26E+08  | 9.18E-01        | N/A      | -          | 5.35E-07      | 3.75E-01 | 1.56E-05   | 7437    |                                 |
| 9     | rs7470806  | 1.2E+08  | 7.09E-01        | N/A     | 15    | rs7179994  | 25997365  | 7.80E-01        | OCA2     | -          | 5.35E-07      | 2.87E-01 | 5.65E-06   | 7438    |                                 |
| 6     | rs2169100  | 93477143 | 5.01E-01        | N/A     | 10    | rs4256883  | 63577608  | 9.27E-02        | N/A      | -          | 5.35E-07      | 4.18E-01 | 2.89E-05   | 7439    |                                 |
| 6     | rs9380215  | 31157634 | 4.29E-02        | N/A     | 6     | rs130067   | 31226490  | 8.62E-01        | TCF19    | MHC        | 5.35E-07      | 5.96E-02 | 5.33E-07   | 7440    |                                 |
| 1     | rs9730586  | 74734405 | 7.35E-01        | TNNI3K  | 1     | s11164301  | 1.02E+08  | 2.21E-01        | N/A      | -          | 5.35E-07      | 8.10E-01 | 5.93E-04   | 7441    |                                 |
| 6     | rs12196881 | 40936923 | 1.22E-01        | N/A     | 8     | rs1662248  | 26499553  | 1.69E-02        | DPYSL2   | -          | 5.35E-07      | 2.84E-02 | 3.15E-07   | 7442    |                                 |
| 4     | rs1320763  | 3383007  | 1.24E-02        | RGS12   | 5     | s13173741  | 87233291  | 5.32E-01        | N/A      | -          | 5.35E-07      | 4.90E-01 | 3.57E-04   | 7443    |                                 |
| 2     | rs1430642  | 79721176 | 7.19E-01        | CTNNA2  | 7     | rs6965194  | 94246494  | 7.30E-01        | N/A      | -          | 5.35E-07      | 6.03E-01 | 5.15E-05   | 7444    |                                 |
| 1     | rs1493081  | 2.27E+08 | 9.40E-01        | N/A     | 12    | rs4760933  | 69430025  | 4.52E-01        | PTPRR    | -          | 5.35E-07      | 6.90E-01 | 4.84E-05   | 7445    |                                 |
| 6     | rs9378310  | 1671161  | 4.51E-02        | GMDS    | 2     | rs2890439  | 13375247  | 5.43E-01        | N/A      | -          | 5.35E-07      | 7.89E-02 | 8.98E-03   | 7446    |                                 |
| 9     | rs871495   | 89327436 | 1.97E-01        | DAPK1   | 12    | s10082832  | 1.24E+08  | 4.76E-01        | DHX37    | -          | 5.35E-07      | 2.06E-01 | 1.75E-05   | 7447    |                                 |
| 3     | rs9311726  | 59761072 | 9.41E-01        | FHIT    | 16    | rs3011249  | 61026793  | 2.25E-02        | N/A      | -          | 5.35E-07      | 3.09E-01 | 7.71E-04   | 7448    |                                 |
| 14    | rs6572524  | 48440753 | 2.04E-01        | N/A     | 15    | rs2623255  | 50035348  | 1.42E-02        | LEO1     | -          | 5.35E-07      | 6.94E-01 | 3.31E-04   | 7449    |                                 |
| 6     | rs6597004  | 3773229  | 7.05E-02        | N/A     | 3     | s11716025  | 1.72E+08  | 5.87E-01        | TNFK     | -          | 5.36E-07      | 3.17E-01 | 5.18E-06   | 7450    |                                 |
| 6     | rs7745656  | 32788948 | 1.70E-01        | N/A     | 10    | rs4245009  | 52247821  | 7.47E-01        | A1CF     | MHC        | 5.36E-07      | 9.79E-02 | 2.34E-03   | 7451    |                                 |
| 2     | rs12619674 | 81300586 | 6.24E-01        | N/A     | 4     | s11132161  | 1.84E+08  | 9.03E-01        | DCD      | -          | 5.36E-07      | 1.90E-01 | 2.01E-06   | 7452    |                                 |
| 17    | rs2604953  | 36869956 | 5.87E-01        | KRT38   | 21    | rs9984330  | 24880617  | 4.11E-01        | N/A      | -          | 5.36E-07      | 4.44E-01 | 1.45E-05   | 7453    |                                 |
| 1     | rs12058205 | 1.89E+08 | 6.51E-01        | FAM5C   | 15    | rs3743204  | 53577602  | 8.77E-02        | DYX1C1   | -          | 5.36E-07      | 8.24E-01 | 1.29E-04   | 7454    |                                 |
| 9     | rs1147377  | 1.31E+08 | 3.41E-01        | N/A     | 18    | rs4798681  | 8727474   | 2.97E-01        | KIAA0802 | -          | 5.36E-07      | 1.11E-01 | 2.91E-03   | 7455    |                                 |
| 6     | rs9376770  | 1.44E+08 | 7.64E-01        | PHACTR2 | 12    | rs7996510  | 45368378  | 7.15E-01        | N/A      | -          | 5.36E-07      | 5.86E-01 | 1.77E-05   | 7456    |                                 |
| 6     | rs7453084  | 8297003  | 5.04E-01        | N/A     | 3     | rs1861074  | 71083241  | 6.71E-01        | ANKRD53  | -          | 5.36E-07      | 2.62E-01 | 2.10E-03   | 7457    |                                 |
| 8     | rs7007530  | 38932203 | 3.32E-01        | PLEKHA2 | 14    | rs1176968  | 40503056  | 8.90E-01        | N/A      | -          | 5.36E-07      | 4.19E-02 | 7.07E-07   | 7458    |                                 |
| 1     | rs235922   | 1.7E+08  | 1.40E-01        | MYOC    | 2     | rs6759703  | 1.54E+08  | 7.80E-01        | N/A      | -          | 5.36E-07      | 8.35E-02 | 6.29E-03   | 7459    |                                 |
| 6     | rs442745   | 33490219 | 8.11E-01        | CUTA    | 6     | rs717120   | 1.36E+08  | 4.48E-01        | AH1      | MHC        | 5.36E-07      | 3.30E-01 | 9.89E-04   | 7460    |                                 |
| 6     | rs559087   | 1.46E+08 | 7.16E-02        | N/A     | 1     | rs1288479  | 53551492  | 3.28E-01        | LRP8     | -          | 5.36E-07      | 7.46E-01 | 3.30E-05   | 7461    |                                 |
| 3     | rs4676593  | 38817916 | 9.69E-01        | SCN10A  | 14    | s10140652  | 19761728  | 6.10E-01        | OR11H6   | -          | 5.37E-07      | 2.65E-02 | 3.99E-03</ |         |                                 |

| SNP A |            |          |                 |           | SNP B |            |          |                    |          | Interaction P |          |          | Ranking  | Cluster in top 100 interactions |  |
|-------|------------|----------|-----------------|-----------|-------|------------|----------|--------------------|----------|---------------|----------|----------|----------|---------------------------------|--|
| CHR   | SNP        | Location | gle locus P val | Gene      | CHR   | SNP        | Location | single locus P val | Gene     | MHC region    | Stage 1  | Stage 2  | Combined |                                 |  |
| 2     | rs1531968  | 2.4E+08  | 4.33E-01        | N/A       | 4     | rs6531358  | 35032724 | 4.82E-01           | N/A      | -             | 5.39E-07 | 1.27E-02 | 2.09E-08 | 7503                            |  |
| 2     | rs1015230  | 6269313  | 1.46E-01        | N/A       | 19    | rs722571   | 12672379 | 7.95E-01           | DHPS     | -             | 5.40E-07 | 1.54E-02 | 3.28E-08 | 7504                            |  |
| 1     | rs7528002  | 2.45E+08 | 2.33E-02        | SCCPDH    | 20    | rs2424239  | 19560584 | 2.37E-01           | SLC24A3  | -             | 5.40E-07 | 7.38E-01 | 1.24E-04 | 7505                            |  |
| 7     | rs2969071  | 2479968  | 1.70E-01        | N/A       | 9     | rs1634352  | 80503640 | 1.86E-01           | N/A      | -             | 5.40E-07 | 8.17E-01 | 1.25E-04 | 7506                            |  |
| 1     | rs4844686  | 2.07E+08 | 1.37E-02        | N/A       | 12    | rs2304818  | 39602648 | 8.58E-02           | CNTN1    | -             | 5.40E-07 | 8.79E-01 | 1.68E-04 | 7507                            |  |
| 1     | rs10157528 | 2.32E+08 | 3.43E-01        | SLC35F3   | 5     | rs16872154 | 73991036 | 8.31E-01           | ENC1     | -             | 5.40E-07 | 1.69E-01 | 1.51E-03 | 7508                            |  |
| 4     | rs1404372  | 57898362 | 5.00E-01        | N/A       | 5     | rs2973522  | 11128691 | 7.21E-01           | CTNND2   | -             | 5.40E-07 | 6.41E-01 | 1.23E-04 | 7509                            |  |
| 6     | rs4437459  | 24964302 | 7.51E-01        | FAM65B    | 11    | rs4540821  | 35914185 | 1.00E-01           | LDLRAD3  | -             | 5.40E-07 | 4.51E-01 | 9.71E-04 | 7510                            |  |
| 1     | rs12036568 | 2.12E+08 | 2.79E-01        | N/A       | 4     | rs7669821  | 39198618 | 5.99E-01           | N/A      | -             | 5.40E-07 | 4.68E-01 | 3.75E-06 | 7511                            |  |
| 2     | rs11679592 | 2385495  | 7.48E-01        | N/A       | 8     | rs17149871 | 9242040  | 7.31E-01           | N/A      | -             | 5.40E-07 | 5.35E-01 | 4.06E-04 | 7512                            |  |
| 2     | rs4971336  | 1017830  | 6.05E-01        | SNTG2     | 5     | rs1692395  | 71389241 | 8.04E-01           | N/A      | -             | 5.40E-07 | 7.29E-01 | 5.38E-04 | 7513                            |  |
| 4     | rs1394272  | 1.48E+08 | 5.59E-01        | TTC29     | 15    | rs8033802  | 76286842 | 2.87E-01           | ACSBG1   | -             | 5.40E-07 | 3.01E-01 | 1.76E-05 | 7514                            |  |
| 6     | rs9398296  | 1.12E+08 | 6.12E-01        | WISP3     | 22    | rs5751997  | 23517544 | 1.79E-01           | PIWIL3   | -             | 5.40E-07 | 5.48E-01 | 5.31E-04 | 7515                            |  |
| 2     | rs11893319 | 1.97E+08 | 1.77E-01        | HECW2     | 3     | rs1682895  | 1.75E+08 | 6.72E-01           | NLGN1    | -             | 5.40E-07 | 7.35E-01 | 2.97E-04 | 7516                            |  |
| 2     | rs16834182 | 1.93E+08 | 8.92E-01        | TMEFF2    | 4     | rs997572   | 35725168 | 4.99E-01           | ARAP2    | -             | 5.40E-07 | 7.55E-01 | 2.23E-04 | 7517                            |  |
| 9     | rs1874105  | 14842141 | 6.85E-01        | FREM1     | 14    | rs10136166 | 61720094 | 1.24E-01           | N/A      | -             | 5.40E-07 | 7.79E-01 | 1.48E-04 | 7518                            |  |
| 7     | rs6978845  | 1.54E+08 | 9.80E-01        | DPP6      | 22    | rs132405   | 43509092 | 1.47E-01           | PRR5     | -             | 5.40E-07 | N/A      | N/A      | 7519                            |  |
| 3     | rs16854433 | 1.1E+08  | 8.92E-01        | HHLA2     | 10    | rs869963   | 87285190 | 3.38E-01           | N/A      | -             | 5.41E-07 | 1.48E-01 | 3.03E-03 | 7520                            |  |
| 5     | rs3112410  | 2568875  | 9.66E-01        | N/A       | 8     | rs7824696  | 53389772 | 4.34E-01           | ST18     | -             | 5.41E-07 | 2.31E-01 | 1.66E-03 | 7521                            |  |
| 1     | rs1109223  | 2.22E+08 | 3.26E-01        | CAPN8     | 4     | rs1980360  | 83913307 | 9.20E-01           | SCD5     | -             | 5.41E-07 | 4.55E-01 | 1.47E-05 | 7522                            |  |
| 2     | rs7566765  | 41672351 | 5.27E-01        | N/A       | 17    | rs11078871 | 10860250 | 8.61E-01           | N/A      | -             | 5.41E-07 | 8.67E-01 | 8.44E-05 | 7523                            |  |
| 10    | rs1881735  | 49246884 | 3.65E-01        | N/A       | 20    | rs6063141  | 45779866 | 4.18E-01           | SULF2    | -             | 5.41E-07 | 2.86E-02 | 2.89E-07 | 7524                            |  |
| 4     | rs6850999  | 80720962 | 6.97E-02        | N/A       | 7     | rs16480    | 24277594 | 2.38E-01           | NPY      | -             | 5.41E-07 | 3.08E-01 | 1.46E-05 | 7525                            |  |
| 1     | rs10916042 | 2.25E+08 | 1.61E-01        | N/A       | 12    | rs1488643  | 94140216 | 7.65E-01           | FGD6     | -             | 5.41E-07 | 3.64E-01 | 2.43E-05 | 7526                            |  |
| 3     | rs9869100  | 77494923 | 4.96E-01        | ROBO2     | 11    | rs2239695  | 1.18E+08 | 6.63E-01           | CD3D     | -             | 5.41E-07 | 5.92E-01 | 3.58E-04 | 7527                            |  |
| 4     | rs2063822  | 70988012 | 8.06E-01        | CSN1S2A   | 10    | rs2619111  | 1.19E+08 | 6.03E-01           | KCNK18   | -             | 5.41E-07 | 7.51E-01 | 9.41E-06 | 7528                            |  |
| 9     | rs17771589 | 24248863 | 8.18E-01        | N/A       | 12    | rs11051658 | 31945102 | 6.68E-01           | N/A      | -             | 5.41E-07 | N/A      | N/A      | 7529                            |  |
| 1     | rs4147592  | 1.64E+08 | 8.02E-01        | MGST3     | 2     | rs10197841 | 1.46E+08 | 4.89E-01           | N/A      | -             | 5.41E-07 | 2.47E-01 | 9.98E-04 | 7530                            |  |
| 1     | rs4147592  | 1.64E+08 | 8.02E-01        | MGST3     | 2     | rs13426482 | 1.46E+08 | 4.89E-01           | N/A      | -             | 5.41E-07 | 2.47E-01 | 9.98E-04 | 7531                            |  |
| 5     | rs12697730 | 82944230 | 4.26E-01        | N/A       | 19    | rs916694   | 40384243 | 9.02E-01           | N/A      | -             | 5.41E-07 | 3.73E-01 | 1.05E-05 | 7532                            |  |
| 7     | rs4723037  | 30966625 | 1.87E-01        | GHRHR     | 15    | rs4601989  | 65239008 | 4.20E-01           | SMAD3    | -             | 5.41E-07 | 6.69E-01 | 1.97E-04 | 7533                            |  |
| 5     | rs2607148  | 82947341 | 4.26E-01        | N/A       | 19    | rs916694   | 40384243 | 9.02E-01           | N/A      | -             | 5.41E-07 | N/A      | N/A      | 7534                            |  |
| 3     | rs962268   | 28182767 | 8.92E-01        | N/A       | 3     | rs6809777  | 30647366 | 6.94E-01           | TGFB2    | -             | 5.41E-07 | 9.49E-01 | 2.06E-05 | 7535                            |  |
| 2     | rs10191556 | 2.42E+08 | 2.87E-01        | THAP4     | 4     | rs6847598  | 76969380 | 6.04E-01           | USO1     | -             | 5.41E-07 | 1.53E-02 | 1.92E-07 | 7536                            |  |
| 6     | rs4715646  | 57008299 | 4.50E-01        | BEND6     | 2     | rs280210   | 1.22E+08 | 8.01E-01           | N/A      | -             | 5.41E-07 | 4.83E-01 | 8.52E-06 | 7537                            |  |
| 11    | rs728341   | 1.33E+08 | 7.86E-01        | OPCML     | 16    | rs4786964  | 7085568  | 4.11E-03           | A2BP1    | -             | 5.42E-07 | 3.66E-01 | 8.77E-06 | 7538                            |  |
| 15    | rs11858872 | 55831992 | 7.86E-01        | N/A       | 20    | rs10485751 | 11927195 | 8.28E-01           | N/A      | -             | 5.42E-07 | 8.81E-01 | 8.26E-05 | 7539                            |  |
| 6     | rs13197916 | 5872558  | 8.81E-01        | N/A       | 2     | rs4668879  | 15221205 | 8.99E-01           | NBAS     | -             | 5.42E-07 | 2.36E-01 | 3.29E-03 | 7540                            |  |
| 11    | rs11026661 | 3328263  | 3.84E-02        | ZNF195    | 13    | rs1571069  | 1.02E+08 | 6.24E-01           | BIVM     | -             | 5.42E-07 | 2.28E-01 | 1.07E-03 | 7541                            |  |
| 13    | rs4584703  | 84163820 | 6.53E-01        | N/A       | 16    | rs223881   | 55944067 | 4.22E-01           | CX3CL1   | -             | 5.42E-07 | 7.61E-01 | 1.25E-04 | 7542                            |  |
| 5     | rs3892476  | 1.33E+08 | 7.52E-01        | N/A       | 7     | rs856589   | 46700832 | 1.76E-01           | N/A      | -             | 5.42E-07 | 8.58E-01 | 1.32E-04 | 7543                            |  |
| 1     | rs857123   | 56978254 | 9.57E-01        | C1orf168  | 17    | rs2214448  | 29418554 | 1.58E-01           | ACCN1    | -             | 5.42E-07 | 9.49E-01 | 7.09E-05 | 7544                            |  |
| 6     | rs6929192  | 75691542 | 3.17E-01        | N/A       | 14    | rs712285   | 33696953 | 8.59E-01           | N/A      | -             | 5.42E-07 | N/A      | N/A      | 7545                            |  |
| 3     | rs7431530  | 29357545 | 3.66E-01        | N/A       | 22    | rs9622429  | 35331441 | 5.96E-01           | CACNG2   | -             | 5.42E-07 | 8.59E-01 | 3.14E-04 | 7546                            |  |
| 8     | rs16915724 | 94263226 | 8.31E-01        | N/A       | 22    | rs2190742  | 15634399 | 9.23E-01           | XKR3     | -             | 5.42E-07 | N/A      | N/A      | 7547                            |  |
| 1     | rs2992736  | 18670290 | 9.82E-01        | KLHDC7A   | 2     | rs2887087  | 33548577 | 8.64E-01           | RASGRP3  | -             | 5.42E-07 | 3.08E-01 | 2.82E-06 | 7548                            |  |
| 3     | rs812124   | 30750967 | 9.07E-01        | GADL1     | 3     | rs6769495  | 1.75E+08 | 2.10E-03           | NLGN1    | -             | 5.42E-07 | 3.24E-01 | 8.95E-04 | 7549                            |  |
| 3     | rs9866032  | 8526112  | 4.30E-01        | N/A       | 14    | rs1158955  | 24439995 | 9.41E-01           | STXBP6   | -             | 5.42E-07 | 4.96E-01 | 2.74E-04 | 7550                            |  |
| 7     | rs4947618  | 51599655 | 4.53E-01        | N/A       | 10    | rs12414926 | 15714011 | 3.40E-01           | ITGA8    | -             | 5.42E-07 | 6.16E-01 | 2.10E-05 | 7551                            |  |
| 7     | rs4947617  | 51599656 | 4.53E-01        | N/A       | 10    | rs12414926 | 15714011 | 3.40E-01           | ITGA8    | -             | 5.42E-07 | 6.70E-01 | 2.55E-05 | 7552                            |  |
| 6     | rs9490225  | 1.22E+08 | 2.46E-01        | N/A       | 3     | rs524431   | 74383584 | 3.74E-01           | CNTN3    | -             | 5.43E-07 | 4.98E-02 | 6.03E-07 | 7553                            |  |
| 2     | rs13407493 | 1.02E+08 | 5.04E-01        | N/A       | 2     | rs16850533 | 2.35E+08 | 5.53E-01           | N/A      | -             | 5.43E-07 | 6.77E-01 | 5.01E-04 | 7554                            |  |
| 9     | rs10982461 | 1.17E+08 | 3.08E-01        | TNFSF8    | 13    | rs1334825  | 68827182 | 6.82E-01           | N/A      | -             | 5.43E-07 | 8.65E-01 | 4.45E-05 | 7555                            |  |
| 1     | rs7544003  | 31461675 | 6.64E-02        | NKAIN1    | 14    | rs10130621 | 28940257 | 7.75E-02           | N/A      | -             | 5.43E-07 | N/A      | N/A      | 7556                            |  |
| 2     | rs12612898 | 52509436 | 7.11E-03        | N/A       | 14    | rs1159103  | 74341107 | 9.84E-01           | YLP1M1   | -             | 5.43E-07 | 3.50E-01 | 1.76E-05 | 7557                            |  |
| 6     | rs3823055  | 1.61E+08 | 9.03E-01        | PLG       | 1     | rs2453200  | 2.42E+08 | 5.37E-01           | N/A      | -             | 5.43E-07 | 3.54E-01 | 3.37E-03 | 7558                            |  |
| 3     | rs12491696 | 21889150 | 6.98E-01        | N/A       | 19    | rs12977053 | 35520535 | 8.54E-01           | N/A      | -             | 5.43E-07 | 1.81E-02 | 4.49E-02 | 7559                            |  |
| 6     | rs4947296  | 31166157 | 4.31E-02        | N/A       | 6     | rs3130534  | 31317024 | 3.50E-01           | N/A      | MHC           | 5.43E-07 | 1.71E-01 | 2.85E-06 | 7560                            |  |
| 2     | rs4662670  | 1.3E+08  | 8.36E-01        | LOC389033 | 13    | rs3742207  | 1.1E+08  | 3.69E-01           | COL4A1   | -             | 5.43E-07 | 3.54E-01 | 5.40E-06 | 7561                            |  |
| 2     | rs10192881 | 79415518 | 6.27E-01        | N/A       | 11    | rs6590919  | 1.01E+08 | 4.91E-01           | N/A      | -             | 5.43E-07 | 6.60E-01 | 7.06E-05 | 7562                            |  |
| 5     | rs11745906 | 83610946 | 6.03E-01        | EDIL3     | 20    | rs6110407  | 14657451 | 5.12E-01           | MACROD2  | -             | 5.43E-07 | 1.33E-01 | 4.06E-03 | 7563                            |  |
| 6     | rs9363764  | 68288763 | 7.99E-01        | N/A       | 4     | rs6843121  | 1.13E+08 | 6.77E-01           | N/A      | -             | 5.43E-07 | 1.35E-01 | 1.30E-06 | 7564                            |  |
| 6     | rs4713420  | 31101546 | 1.78E-02        | N/A       | 6     | rs3095250  | 31316319 | 6.90E-02           | N/A      | MHC           | 5.43E-07 | 9.18E-01 | 4.91E-04 | 7565                            |  |
| 4     | rs10520473 | 1.82E+08 | 5.10E-01        | N/A       | 13    | rs9594808  | 42242401 | 8.39E-01           | C13orf30 | -             | 5.43E-07 | 1.25E-01 | 5.73E-03 | 7566                            |  |
| 12    | rs11107847 | 93910922 | 2.10E-01        | NDUFA12   | 15    | rs10518996 | 57164738 | 4.83E-01           | RNF111   | -             | 5.43E-07 | 5.62E-01 | 2.26E-04 | 7567                            |  |
| 4     | rs6835572  | 1.82E+08 | 5.19E-01        | N/A       | 17    | rs11650777 | 65856078 | 3.76E-01           | N/A      | -             | 5.43E-07 | 6.89E-01 | 4.62E-05 | 7568                            |  |
| 1     | rs2184345  | 2.31E+08 | 3.18E-01        | N/A       | 7     | rs7797216  | 53125393 | 2.18E-01           | N/A      | -             | 5.44E-07 | 3.88E-01 | 8.75E-06 | 7569                            |  |
| 12    | rs7959314  | 23962261 | 3.69E-01        | SOX5      | 22    | rs112544   | 19676485 | 1.08E-01           | MGC16703 | -             | 5.44E-07 | 4.11E-01 | 8.23E-05 | 7570                            |  |
| 7     | rs4719162  | 70764626 | 3.97E-01        | WBSCR17   | 12    | rs952367   | 77167621 | 8.74E-01           | N/A      | -             | 5.44E-07 | 4.19E-01 | 7.98E-06 | 7571                            |  |
| 6     | rs10499303 | 1.56E+08 | 5.17E-01        | TFB1M     | 3     | rs2195914  | 1.29E+08 | 6.64E-01           | KBTBD12  | -             | 5.44E-07 | 8.56E-01 | 8.78E-05 | 7572                            |  |
| 6     | rs6917887  | 1.3E+08  | 3.98E-01        | ARHGAP18  | 20    | rs6040993  | 11880255 | 9.18E-01           | N/A      | -             | 5.44E-07 | 9.15E-01 | 2.05E-04 | 7573                            |  |
| 6     | rs6917887  | 1.3E+08  | 3.98E-01        | ARHGAP18  | 20    | rs6078404  | 11877122 | 9.18E-01           | N/A      | -             | 5.44E-07 | 9.61E-01 | 1.42E-04 | 7574                            |  |
| 2     | rs14       |          |                 |           |       |            |          |                    |          |               |          |          |          |                                 |  |

| SNP A |            |          |                 |          | SNP B |            |          |                    |             | Interaction P |          |          | Ranking  | Cluster in top 100 interactions |  |
|-------|------------|----------|-----------------|----------|-------|------------|----------|--------------------|-------------|---------------|----------|----------|----------|---------------------------------|--|
| CHR   | SNP        | Location | gle locus P val | Gene     | CHR   | SNP        | Location | single locus P val | Gene        | MHC region    | Stage 1  | Stage 2  | Combined |                                 |  |
| 1     | rs1157688  | 4536627  | 6.86E-01        | N/A      | 1     | rs12093992 | 2.38E+08 | 2.66E-01           | N/A         | -             | 5.46E-07 | 9.54E-01 | 1.06E-04 | 7615                            |  |
| 16    | rs7500355  | 84634601 | 7.85E-01        | N/A      | 17    | rs7213544  | 22034311 | 9.87E-01           | N/A         | -             | 5.46E-07 | 2.61E-01 | 1.12E-03 | 7616                            |  |
| 5     | rs750063   | 1.54E+08 | 3.82E-01        | GALNT10  | 17    | rs8081781  | 14385239 | 5.30E-01           | N/A         | -             | 5.46E-07 | 5.74E-01 | 6.26E-05 | 7617                            |  |
| 1     | rs270765   | 44796002 | 7.32E-01        | RNF220   | 8     | rs1615810  | 5555216  | 4.96E-01           | N/A         | -             | 5.46E-07 | 2.75E-01 | 3.49E-06 | 7618                            |  |
| 2     | rs1843758  | 1.73E+08 | 8.06E-01        | N/A      | 4     | rs10805124 | 44005235 | 8.84E-01           | CKTD8       | -             | 5.46E-07 | 4.26E-01 | 1.13E-03 | 7619                            |  |
| 3     | rs3851997  | 1.33E+08 | 2.94E-01        | N/A      | 18    | rs4796915  | 11218713 | 7.61E-01           | N/A         | -             | 5.46E-07 | 7.09E-01 | 1.38E-04 | 7620                            |  |
| 6     | rs1265156  | 31250276 | 6.76E-01        | TCF19    | 6     | rs9394047  | 31344229 | 1.23E-01           | HLA-C       | MHC           | 5.47E-07 | 3.00E-01 | 4.09E-06 | 7621                            |  |
| 5     | rs4703537  | 81561627 | 7.28E-01        | ATG10    | 5     | rs1174932C | 86161696 | 5.93E-01           | N/A         | -             | 5.47E-07 | 8.05E-01 | 1.67E-05 | 7622                            |  |
| 1     | rs7514610  | 1.56E+08 | 9.24E-01        | N/A      | 10    | rs10752261 | 12370719 | 4.42E-01           | N/A         | -             | 5.47E-07 | 3.93E-01 | 1.13E-03 | 7623                            |  |
| 2     | rs12477036 | 2.3E+08  | 4.94E-01        | PID1     | 3     | rs1352409  | 3785723  | 1.45E-01           | N/A         | -             | 5.47E-07 | 8.99E-03 | 5.04E-08 | 7624                            |  |
| 6     | rs602414   | 1.38E+08 | 4.34E-01        | N/A      | 12    | rs10772751 | 14295548 | 4.15E-02           | N/A         | -             | 5.47E-07 | 4.99E-01 | 9.61E-06 | 7625                            |  |
| 4     | rs4697055  | 23876434 | 1.38E-01        | N/A      | 5     | rs1047473C | 2057160  | 7.20E-02           | N/A         | -             | 5.47E-07 | 5.13E-01 | 1.14E-05 | 7626                            |  |
| 10    | rs6585278  | 1.16E+08 | 8.57E-01        | ABLIM1   | 19    | rs1035937  | 38830785 | 7.88E-01           | CHST8       | -             | 5.47E-07 | 9.16E-01 | 5.01E-05 | 7627                            |  |
| 14    | rs989909   | 74157997 | 7.17E-01        | LTBP2    | 22    | rs2240432  | 29851404 | 5.25E-01           | INPP5J      | -             | 5.47E-07 | 2.05E-01 | 3.65E-06 | 7628                            |  |
| 9     | rs4979054  | 1.14E+08 | 3.99E-01        | N/A      | 11    | rs531767   | 78337603 | 1.73E-01           | ODZ4        | -             | 5.47E-07 | 4.72E-01 | 5.44E-05 | 7629                            |  |
| 6     | rs3778084  | 1.52E+08 | 1.73E-01        | ESR1     | 3     | rs2568911  | 1.96E+08 | 3.66E-01           | N/A         | -             | 5.47E-07 | N/A      | N/A      | 7630                            |  |
| 4     | rs2231142  | 89271347 | 7.83E-01        | ABCG2    | 9     | rs1081930C | 1.3E+08  | 6.61E-01           | SH2D3C      | -             | 5.47E-07 | 5.68E-01 | 1.22E-04 | 7631                            |  |
| 5     | rs306107   | 1.11E+08 | 5.85E-01        | CAMK4    | 9     | rs7035592  | 27224029 | 1.27E-01           | NCRN/A00032 | -             | 5.47E-07 | 6.00E-01 | 1.43E-04 | 7632                            |  |
| 4     | rs2131466  | 28426304 | 8.00E-01        | N/A      | 9     | rs6474732  | 12805091 | 2.53E-01           | C9orf150    | -             | 5.47E-07 | 7.52E-01 | 4.56E-05 | 7633                            |  |
| 2     | rs6725806  | 1.03E+08 | 4.53E-01        | SLC9A2   | 3     | rs1813256  | 1.47E+08 | 5.56E-01           | N/A         | -             | 5.47E-07 | 4.20E-02 | 3.33E-07 | 7634                            |  |
| 11    | rs17214070 | 4347807  | 2.77E-01        | OR52B4   | 12    | rs7955684  | 1.28E+08 | 8.86E-02           | TMEM132D    | -             | 5.47E-07 | 3.30E-01 | 2.10E-03 | 7635                            |  |
| 5     | rs564195   | 1.78E+08 | 3.20E-01        | COL23A1  | 10    | rs7914626  | 72151924 | 7.56E-01           | ADAMTS14    | -             | 5.47E-07 | 3.60E-01 | 2.38E-03 | 7636                            |  |
| 11    | rs11224280 | 96358999 | 4.47E-01        | N/A      | 13    | rs9542922  | 71826381 | 6.18E-01           | N/A         | -             | 5.47E-07 | 9.69E-01 | 3.98E-05 | 7637                            |  |
| 7     | rs17166689 | 13068758 | 6.44E-02        | N/A      | 19    | rs4801457  | 62485375 | 9.79E-01           | ZNF460      | -             | 5.47E-07 | N/A      | N/A      | 7638                            |  |
| 6     | rs1419638  | 29463498 | 1.74E-01        | OR12D3   | 22    | rs9287631  | 2.39E+08 | 3.66E-01           | N/A         | MHC           | 5.47E-07 | 5.24E-01 | 2.32E-05 | 7639                            |  |
| 1     | rs585075   | 18893960 | 6.59E-01        | PAX7     | 13    | rs4885913  | 55035424 | 5.13E-01           | N/A         | -             | 5.48E-07 | 9.19E-02 | 4.28E-07 | 7640                            |  |
| 15    | rs4886456  | 73802922 | 9.11E-01        | ODF3L1   | 18    | rs1942405  | 67482471 | 1.27E-01           | N/A         | -             | 5.48E-07 | 1.27E-01 | 1.31E-06 | 7641                            |  |
| 4     | rs2313565  | 1.62E+08 | 9.47E-01        | N/A      | 9     | rs870409   | 13977094 | 9.46E-01           | N/A         | -             | 5.48E-07 | 9.14E-01 | 1.72E-04 | 7642                            |  |
| 10    | rs7918519  | 20218037 | 5.41E-01        | PLXDC2   | 15    | rs16964798 | 35283503 | 3.05E-01           | N/A         | -             | 5.48E-07 | 5.60E-01 | 9.13E-04 | 7643                            |  |
| 12    | rs10771301 | 26819693 | 2.20E-01        | ITPR2    | 18    | rs1991621  | 69620005 | 8.81E-01           | N/A         | -             | 5.48E-07 | N/A      | N/A      | 7644                            |  |
| 16    | rs8056267  | 63850483 | 5.36E-01        | N/A      | 20    | rs761262   | 15726775 | 7.52E-02           | MACROD2     | -             | 5.48E-07 | 1.33E-01 | 2.84E-06 | 7645                            |  |
| 12    | rs11107828 | 93889967 | 1.48E-01        | NDUFA12  | 20    | rs4810539  | 44757415 | 6.23E-01           | SLC2A10     | -             | 5.48E-07 | 6.17E-01 | 1.61E-05 | 7646                            |  |
| 2     | rs1378428  | 78535975 | 9.45E-01        | N/A      | 9     | rs871807   | 1.16E+08 | 9.50E-01           | ZNF618      | -             | 5.48E-07 | 4.19E-01 | 5.03E-04 | 7647                            |  |
| 7     | rs4283980  | 1.04E+08 | 1.62E-01        | LHFPL3   | 16    | rs8055043  | 80537939 | 8.22E-02           | PLCG2       | -             | 5.48E-07 | 7.63E-01 | 4.25E-05 | 7648                            |  |
| 8     | rs7461956  | 6760323  | 1.09E-01        | DEFA6    | 10    | rs3843023  | 92781365 | 3.20E-01           | N/A         | -             | 5.48E-07 | 5.56E-02 | 2.29E-02 | 7649                            |  |
| 6     | rs174402   | 1.12E+08 | 7.12E-01        | N/A      | 6     | rs197681   | 1.23E+08 | 8.34E-01           | PKIB        | -             | 5.48E-07 | 8.66E-01 | 1.53E-04 | 7650                            |  |
| 4     | rs4312793  | 44119244 | 1.92E-01        | CKTD8    | 13    | rs9520146  | 1.06E+08 | 7.81E-01           | N/A         | -             | 5.48E-07 | 6.73E-01 | 2.27E-05 | 7651                            |  |
| 3     | rs1914812  | 1.18E+08 | 4.42E-01        | N/A      | 9     | rs2282683  | 78307571 | 6.05E-01           | GCNT1       | -             | 5.48E-07 | 3.18E-01 | 7.25E-06 | 7652                            |  |
| 3     | rs1914812  | 1.18E+08 | 4.42E-01        | N/A      | 9     | rs707739   | 78308723 | 6.05E-01           | GCNT1       | -             | 5.48E-07 | 3.18E-01 | 7.25E-06 | 7653                            |  |
| 13    | rs2164172  | 1.09E+08 | 4.20E-01        | N/A      | 18    | rs7244352  | 32192058 | 6.74E-01           | FHOD3       | -             | 5.49E-07 | 2.46E-01 | 8.71E-07 | 7654                            |  |
| 6     | rs1790022  | 1.62E+08 | 2.17E-01        | PARK2    | 9     | rs927319   | 4146304  | 6.61E-01           | GLIS3       | -             | 5.49E-07 | 3.85E-01 | 1.14E-05 | 7655                            |  |
| 6     | rs9398296  | 1.12E+08 | 6.12E-01        | WSPK3    | 3     | rs9820339  | 1.51E+08 | 7.77E-01           | VWTR1       | -             | 5.49E-07 | 4.86E-01 | 2.33E-03 | 7656                            |  |
| 11    | rs10833513 | 21323102 | 5.78E-01        | NELL1    | 18    | rs7243707  | 41486272 | 4.79E-01           | SLC14A2     | -             | 5.49E-07 | 6.76E-01 | 1.04E-03 | 7657                            |  |
| 3     | rs17220622 | 46554129 | 2.14E-01        | LRRC2    | 12    | rs3817012  | 1.21E+08 | 1.89E-01           | CLIP1       | -             | 5.49E-07 | 8.05E-01 | 6.00E-04 | 7658                            |  |
| 1     | rs11164665 | 1.03E+08 | 7.21E-01        | N/A      | 12    | rs697635   | 50569015 | 9.28E-01           | ANKRD33     | -             | 5.49E-07 | 6.72E-01 | 3.62E-04 | 7659                            |  |
| 2     | rs12467286 | 1.96E+08 | 9.95E-01        | N/A      | 11    | rs542284   | 95696359 | 9.26E-01           | MAML2       | -             | 5.49E-07 | 9.01E-01 | 2.12E-04 | 7660                            |  |
| 3     | rs9874470  | 1.17E+08 | 1.48E-01        | LSAMP    | 8     | rs6948440  | 10169975 | 9.13E-01           | MSRA        | -             | 5.49E-07 | 5.60E-01 | 3.73E-04 | 7661                            |  |
| 1     | rs7418397  | 1.05E+08 | 2.50E-02        | N/A      | 12    | rs2671436  | 1E+08    | 4.99E-01           | SLC5A8      | -             | 5.49E-07 | 3.22E-01 | 1.25E-05 | 7662                            |  |
| 10    | rs878259   | 1E+08    | 1.00E-01        | LOXL4    | 14    | rs10138081 | 65602555 | 1.31E-01           | N/A         | -             | 5.49E-07 | 3.27E-01 | 2.35E-05 | 7663                            |  |
| 1     | rs6702660  | 4923290  | 9.64E-01        | N/A      | 13    | rs9576264  | 36886791 | 9.77E-01           | N/A         | -             | 5.49E-07 | 7.36E-03 | 3.33E-02 | 7664                            |  |
| 8     | rs10504458 | 70769716 | 4.74E-01        | SLCO5A1  | 20    | rs402899   | 4368450  | 7.38E-01           | N/A         | -             | 5.49E-07 | 1.42E-01 | 8.96E-04 | 7665                            |  |
| 8     | rs1543157  | 1.29E+08 | 5.43E-01        | N/A      | 19    | rs8112582  | 8148511  | 4.19E-01           | N/A         | -             | 5.50E-07 | 6.73E-01 | 9.67E-05 | 7666                            |  |
| 4     | rs12641060 | 14868093 | 4.27E-02        | N/A      | 16    | rs1970817  | 10483325 | 8.64E-02           | ATF7IP2     | -             | 5.50E-07 | 8.21E-01 | 2.65E-05 | 7667                            |  |
| 1     | rs1737617  | 10773385 | 8.47E-01        | CASZ1    | 12    | rs2072511  | 94905363 | 5.05E-01           | AMDHD1      | -             | 5.50E-07 | 3.41E-01 | 1.37E-05 | 7668                            |  |
| 10    | rs6560807  | 2334268  | 1.96E-01        | N/A      | 14    | rs4906459  | 1.04E+08 | 8.88E-01           | N/A         | -             | 5.50E-07 | 3.62E-01 | 1.24E-05 | 7669                            |  |
| 2     | rs1568766  | 1.3E+08  | 1.61E-01        | N/A      | 7     | rs515906   | 1.54E+08 | 1.75E-01           | DPP6        | -             | 5.50E-07 | 4.17E-01 | 1.91E-05 | 7670                            |  |
| 5     | rs691360   | 18110132 | 6.01E-01        | N/A      | 13    | rs2067649  | 57660246 | 9.30E-01           | N/A         | -             | 5.50E-07 | 4.48E-02 | 1.00E-07 | 7671                            |  |
| 5     | rs4868438  | 1.74E+08 | 1.72E-01        | N/A      | 18    | rs1436907  | 6374431  | 7.68E-01           | L3MBTL4     | -             | 5.50E-07 | 1.60E-01 | 2.04E-06 | 7672                            |  |
| 3     | rs9835427  | 1.17E+08 | 4.15E-01        | LSAMP    | 8     | rs6948440  | 10169975 | 9.13E-01           | MSRA        | -             | 5.50E-07 | 6.78E-01 | 2.46E-04 | 7673                            |  |
| 5     | rs751768   | 66809711 | 7.20E-02        | N/A      | 9     | rs7036602  | 1.04E+08 | 4.93E-01           | N/A         | -             | 5.50E-07 | 4.50E-01 | 1.85E-04 | 7674                            |  |
| 2     | rs4953288  | 45979475 | 3.29E-01        | PRKCE    | 8     | rs11203945 | 18137238 | 7.24E-01           | NAT1        | -             | 5.50E-07 | 7.06E-01 | 3.29E-05 | 7675                            |  |
| 1     | rs1470438  | 1.02E+08 | 6.01E-01        | N/A      | 5     | rs1551050  | 16586551 | 9.95E-01           | FAM134B     | -             | 5.50E-07 | 7.40E-01 | 1.43E-04 | 7676                            |  |
| 16    | rs11149981 | 75927639 | 7.93E-01        | ADAMTS18 | 16    | rs1035572  | 79924772 | 1.65E-01           | GAN         | -             | 5.50E-07 | 1.08E-01 | 1.27E-06 | 7677                            |  |
| 8     | rs241182   | 28703345 | 3.09E-01        | INTS9    | 12    | rs7294478  | 7158081  | 7.76E-01           | RBP5        | -             | 5.50E-07 | 6.16E-02 | 5.06E-03 | 7678                            |  |
| 6     | rs7741153  | 15064906 | 9.28E-01        | N/A      | 2     | rs7574768  | 1.41E+08 | 3.18E-01           | N/A         | -             | 5.50E-07 | 2.78E-01 | 7.36E-06 | 7679                            |  |
| 3     | rs9815177  | 1.48E+08 | 7.47E-01        | N/A      | 11    | rs11826245 | 81030361 | 8.15E-01           | N/A         | -             | 5.50E-07 | 6.37E-01 | 2.28E-04 | 7680                            |  |
| 1     | rs11119972 | 2.11E+08 | 7.34E-01        | ATF3     | 1     | rs1619856  | 2.33E+08 | 3.89E-01           | TARBP1      | -             | 5.50E-07 | 8.69E-01 | 2.54E-05 | 7681                            |  |
| 3     | rs11719844 | 1.76E+08 | 8.09E-01        | N/A      | 13    | rs9506776  | 21518850 | 6.23E-01           | N/A         | -             | 5.51E-07 | 6.58E-01 | 1.96E-05 | 7682                            |  |
| 3     | rs231998   | 1.74E+08 | 1.56E-01        | N/A      | 18    | rs4797283  | 7239740  | 2.25E-01           | LRRC30      | -             | 5.51E-07 | 9.51E-01 | 2.87E-05 | 7683                            |  |
| 3     | rs9828937  | 1.78E+08 | 2.21E-01        | N/A      | 13    | rs1323682  | 1.07E+08 | 2.81E-01           | FAM155A     | -             | 5.51E-07 | 5.25E-01 | 4.03E-04 | 7684                            |  |
| 6     | rs9480921  | 1.1E+08  | 6.83E-01        | CCDC162  | 7     | rs10245351 | 78062680 | 7.43E-01           | MAGI2       | -             | 5.51E-07 | N/A      | N/A      | 7685                            |  |
| 6     | rs9350866  | 81477869 | 8.88E-01        | N/A      | 8     | rs2205263  | 1.17E+08 | 1.04E-01           | N/A         | -             | 5.51E-07 | 1.77E-01 | 1.31E-03 | 7686</                          |  |

| SNP A |            |          |                |          | SNP B |            |          |                     |           | Interaction P |          |          | Ranking  | Cluster in top 100 interactions |  |
|-------|------------|----------|----------------|----------|-------|------------|----------|---------------------|-----------|---------------|----------|----------|----------|---------------------------------|--|
| CHR   | SNP        | Location | gle locus P va | Gene     | CHR   | SNP        | Location | single locus P valu | Gene      | MHC region    | Stage 1  | Stage 2  | Combined |                                 |  |
| 6     | rs4959998  | 4436492  | 5.90E-02       | N/A      | 16    | rs11648585 | 23203475 | 4.34E-01            | SCNN1B    | -             | 5.53E-07 | 6.00E-01 | 1.92E-04 | 7727                            |  |
| 2     | rs12151639 | 71565457 | 9.31E-02       | DYSF     | 7     | rs1266781C | 9032697  | 2.73E-02            | N/A       | -             | 5.53E-07 | 2.00E-01 | 4.67E-03 | 7728                            |  |
| 6     | rs851967   | 1.52E+08 | 3.49E-01       | N/A      | 10    | rs1659840  | 13142854 | 7.05E-01            | N/A       | -             | 5.53E-07 | 9.08E-01 | 3.19E-05 | 7729                            |  |
| 13    | rs947076   | 97235209 | 7.22E-01       | N/A      | 16    | rs2270461  | 88499846 | 7.04E-01            | MC1R      | -             | 5.53E-07 | 4.53E-01 | 2.90E-05 | 7730                            |  |
| 4     | rs13126626 | 1.84E+08 | 1.09E-01       | N/A      | 5     | rs10447222 | 1.5E+08  | 7.87E-01            | RPS14     | -             | 5.53E-07 | 7.14E-01 | 3.05E-04 | 7731                            |  |
| 3     | rs9872768  | 1.48E+08 | 1.86E-01       | N/A      | 4     | rs2055931  | 34528519 | 3.95E-01            | N/A       | -             | 5.53E-07 | 7.87E-01 | 2.18E-04 | 7732                            |  |
| 12    | rs1709696  | 1.27E+08 | 5.19E-01       | TMEM132C | 14    | rs227010   | 22064646 | 3.29E-01            | N/A       | -             | 5.53E-07 | 8.72E-01 | 9.22E-05 | 7733                            |  |
| 6     | rs4709756  | 1.64E+08 | 3.66E-01       | N/A      | 1     | rs2186104  | 2.32E+08 | 2.53E-01            | SLC35F3   | -             | 5.53E-07 | 3.84E-01 | 2.10E-05 | 7734                            |  |
| 1     | rs2605082  | 2.18E+08 | 8.95E-01       | N/A      | 1     | rs2490371  | 2.35E+08 | 9.42E-02            | RYR2      | -             | 5.53E-07 | 5.84E-01 | 1.52E-05 | 7735                            |  |
| 7     | rs10265774 | 1.56E+08 | 1.75E-01       | LMBR1    | 17    | rs9895907  | 5521311  | 2.74E-01            | N/A       | -             | 5.53E-07 | 9.57E-01 | 6.52E-05 | 7736                            |  |
| 7     | rs10265774 | 1.56E+08 | 1.75E-01       | LMBR1    | 17    | rs9915238  | 5520461  | 3.13E-01            | N/A       | -             | 5.53E-07 | 9.57E-01 | 6.52E-05 | 7737                            |  |
| 7     | rs10263303 | 1.57E+08 | 1.02E-01       | PTPRN2   | 9     | rs7863180  | 1.04E+08 | 5.20E-01            | GRIN3A    | -             | 5.53E-07 | 3.63E-02 | 7.61E-03 | 7738                            |  |
| 2     | rs1424916  | 2.18E+08 | 5.75E-01       | TNS1     | 3     | rs740836   | 43769564 | 3.71E-01            | N/A       | -             | 5.53E-07 | 2.33E-01 | 2.60E-06 | 7739                            |  |
| 3     | rs7612632  | 1.52E+08 | 5.85E-01       | CLRN10S  | 11    | rs4755854  | 44605807 | 1.09E-01            | CD82      | -             | 5.53E-07 | 7.89E-01 | 8.41E-05 | 7740                            |  |
| 7     | rs1534001  | 1.56E+08 | 4.98E-02       | N/A      | 9     | rs2015843  | 1.28E+08 | 4.25E-01            | N/A       | -             | 5.53E-07 | 2.62E-05 | 2.62E-05 | 7741                            |  |
| 1     | rs1469267  | 1.64E+08 | 1.60E-01       | XRXG     | 21    | rs222954   | 26839258 | 8.30E-01            | CYYR1     | -             | 5.53E-07 | 3.08E-01 | 4.55E-04 | 7742                            |  |
| 1     | rs12141538 | 43104003 | 3.77E-01       | ZNF691   | 15    | rs4984407  | 92422405 | 6.93E-01            | N/A       | -             | 5.54E-07 | 2.46E-01 | 1.34E-06 | 7743                            |  |
| 15    | rs4702     | 89227564 | 2.93E-02       | FES      | 21    | rs373521   | 26179531 | 7.64E-01            | APP       | -             | 5.54E-07 | 2.89E-01 | 3.35E-06 | 7744                            |  |
| 6     | rs6910563  | 19718814 | 2.28E-01       | N/A      | 8     | rs2028229  | 4643403  | 7.62E-01            | CSMD1     | -             | 5.54E-07 | 6.47E-01 | 2.27E-05 | 7745                            |  |
| 6     | rs6934188  | 19719138 | 2.28E-01       | N/A      | 8     | rs2028229  | 4643403  | 7.62E-01            | CSMD1     | -             | 5.54E-07 | 6.47E-01 | 2.27E-05 | 7746                            |  |
| 6     | rs4711987  | 51897548 | 3.42E-02       | PKHD1    | 7     | rs6973946  | 52171488 | 1.61E-01            | N/A       | -             | 5.54E-07 | 9.75E-01 | 6.48E-05 | 7747                            |  |
| 1     | rs2206047  | 25067287 | 2.47E-02       | N/A      | 4     | rs17292184 | 62677428 | 4.92E-01            | N/A       | -             | 5.54E-07 | 5.84E-01 | 2.15E-04 | 7748                            |  |
| 15    | rs12148851 | 93469960 | 5.52E-01       | N/A      | 16    | rs8047963  | 54347071 | 7.26E-01            | N/A       | -             | 5.54E-07 | 9.09E-01 | 1.77E-04 | 7749                            |  |
| 9     | rs1337706  | 1.04E+08 | 8.55E-01       | N/A      | 16    | rs1260010E | 54865932 | 3.76E-01            | GN/AO1    | -             | 5.54E-07 | 8.47E-02 | 3.32E-06 | 7750                            |  |
| 1     | rs920307   | 1.89E+08 | 2.98E-01       | N/A      | 3     | rs2197126  | 19398565 | 5.56E-01            | KCNC8     | -             | 5.54E-07 | 6.03E-01 | 1.34E-04 | 7751                            |  |
| 6     | rs647108   | 1.38E+08 | 4.75E-01       | N/A      | 3     | rs1579905  | 74711280 | 1.34E-01            | N/A       | -             | 5.54E-07 | 6.76E-01 | 3.73E-05 | 7752                            |  |
| 3     | rs7624435  | 97082944 | 2.66E-01       | N/A      | 12    | rs1881959  | 60854638 | 2.72E-01            | FAM19A2   | -             | 5.54E-07 | 9.81E-02 | 3.49E-03 | 7753                            |  |
| 13    | rs726697   | 1.06E+08 | 4.64E-01       | N/A      | 17    | rs1051502E | 48161244 | 7.47E-01            | N/A       | -             | 5.54E-07 | 1.81E-01 | 9.49E-06 | 7754                            |  |
| 13    | rs726697   | 1.06E+08 | 4.64E-01       | N/A      | 17    | rs4794378  | 48161698 | 7.47E-01            | N/A       | -             | 5.54E-07 | 1.81E-01 | 9.49E-06 | 7755                            |  |
| 13    | rs726697   | 1.06E+08 | 4.64E-01       | N/A      | 17    | rs7216414  | 48155324 | 7.47E-01            | N/A       | -             | 5.54E-07 | 1.81E-01 | 9.49E-06 | 7756                            |  |
| 13    | rs726697   | 1.06E+08 | 4.64E-01       | N/A      | 17    | rs8666976  | 48156155 | 7.47E-01            | N/A       | -             | 5.54E-07 | 1.81E-01 | 9.49E-06 | 7757                            |  |
| 15    | rs8025338  | 35681159 | 4.29E-01       | N/A      | 22    | rs7384414  | 48481780 | 2.57E-01            | N/A       | -             | 5.54E-07 | 9.22E-01 | 6.53E-05 | 7758                            |  |
| 3     | rs7432792  | 70564770 | 1.05E-01       | N/A      | 22    | rs5757290  | 37529882 | 6.56E-01            | DN/AL4    | -             | 5.54E-07 | N/A      | N/A      | 7759                            |  |
| 10    | rs6479812  | 52394805 | 1.88E-01       | N/A      | 20    | rs6132222  | 19539835 | 2.14E-01            | SLC24A3   | -             | 5.55E-07 | 2.59E-01 | 8.17E-04 | 7760                            |  |
| 4     | rs9996986  | 1.87E+08 | 8.69E-01       | SORBS2   | 22    | rs2187793  | 46066667 | 5.79E-01            | N/A       | -             | 5.55E-07 | 8.70E-01 | 3.28E-04 | 7761                            |  |
| 3     | rs234062   | 1.74E+08 | 6.37E-01       | N/A      | 10    | rs6585679  | 85667401 | 7.20E-02            | N/A       | -             | 5.55E-07 | 7.99E-01 | 1.66E-04 | 7762                            |  |
| 8     | rs4457653  | 4933518  | 3.48E-01       | IAKR     | 11    | rs656759   | 1.02E+08 | 3.72E-01            | N/A       | -             | 5.55E-07 | 4.19E-01 | 3.80E-05 | 7763                            |  |
| 10    | rs10106907 | 96855324 | 7.33E-01       | N/A      | 15    | rs4774982  | 55853182 | 9.82E-01            | N/A       | -             | 5.55E-07 | 7.99E-01 | 8.11E-05 | 7764                            |  |
| 14    | rs1885189  | 88457081 | 5.47E-01       | N/A      | 16    | rs7199026  | 70098727 | 8.99E-02            | CHST4     | -             | 5.55E-07 | 4.10E-03 | 2.06E-02 | 7765                            |  |
| 8     | rs992617   | 18040775 | 8.84E-01       | N/A      | 11    | rs2403547  | 19944988 | 7.83E-01            | N/AV2     | -             | 5.55E-07 | 5.79E-01 | 3.00E-05 | 7766                            |  |
| 1     | rs4950760  | 2E+08    | 9.08E-01       | ELF3     | 9     | rs10964427 | 2008825  | 3.19E-01            | SMARCA2   | -             | 5.55E-07 | 8.30E-01 | 3.32E-04 | 7767                            |  |
| 12    | rs759637   | 3564728  | 2.42E-02       | PRMT8    | 16    | rs4073828  | 80527996 | 7.74E-01            | PLCG2     | -             | 5.55E-07 | 8.95E-01 | 5.03E-05 | 7768                            |  |
| 12    | rs7958980  | 41545011 | 1.55E-01       | N/A      | 13    | rs724852   | 75369530 | 7.59E-01            | N/A       | -             | 5.55E-07 | 5.21E-02 | 2.48E-03 | 7769                            |  |
| 3     | rs9815385  | 64899900 | 1.23E-01       | MIR548A2 | 3     | rs1263672E | 1.51E+08 | 2.92E-01            | WWTR1     | -             | 5.55E-07 | 7.41E-01 | 1.38E-05 | 7770                            |  |
| 2     | rs1370600  | 1.34E+08 | 8.59E-01       | NCKAP5   | 17    | rs8069937  | 40564152 | 6.46E-01            | ACBD4     | -             | 5.55E-07 | 9.64E-01 | 1.20E-04 | 7771                            |  |
| 7     | rs10255671 | 1.51E+08 | 4.48E-01       | CRYGN    | 20    | rs988166   | 54354265 | 9.39E-01            | C20orf108 | -             | 5.55E-07 | 1.44E-01 | 1.15E-05 | 7772                            |  |
| 2     | rs10200446 | 1.3E+08  | 9.47E-01       | N/A      | 13    | rs1543001  | 1.07E+08 | 1.33E-01            | N/A       | -             | 5.55E-07 | N/A      | N/A      | 7773                            |  |
| 6     | rs1520     | 39634845 | 1.02E-01       | KIF6     | 12    | rs1356954  | 76074319 | 2.85E-01            | N/A       | -             | 5.55E-07 | 6.25E-02 | 5.26E-03 | 7774                            |  |
| 6     | rs1520     | 39634845 | 1.02E-01       | KIF6     | 12    | rs771655   | 76069560 | 2.85E-01            | N/A       | -             | 5.55E-07 | 6.25E-02 | 5.26E-03 | 7775                            |  |
| 10    | rs7916448  | 24129585 | 6.01E-01       | KIAA1217 | 10    | rs10509103 | 60917716 | 5.79E-01            | N/A       | -             | 5.55E-07 | N/A      | N/A      | 7776                            |  |
| 6     | rs9402970  | 1.39E+08 | 5.89E-01       | KIAA1244 | 5     | rs1754082E | 16581227 | 6.92E-01            | FAM134B   | -             | 5.56E-07 | 2.64E-01 | 1.29E-05 | 7777                            |  |
| 10    | rs3817218  | 17020931 | 5.76E-04       | CUBN     | 14    | rs2355659  | 49553790 | 7.51E-01            | C14orf182 | -             | 5.56E-07 | 7.68E-01 | 3.78E-04 | 7778                            |  |
| 5     | rs10054105 | 1.11E+08 | 6.53E-01       | N/A      | 17    | rs2070782  | 59785865 | 4.81E-01            | N/A       | -             | 5.56E-07 | 8.31E-01 | 1.88E-05 | 7779                            |  |
| 2     | rs4668976  | 15818201 | 7.12E-01       | N/A      | 10    | rs4880384  | 1.34E+08 | 9.99E-01            | N/A       | -             | 5.56E-07 | 9.12E-01 | 5.09E-05 | 7780                            |  |
| 5     | rs655599   | 1.18E+08 | 3.85E-01       | N/A      | 12    | rs6582630  | 37029775 | 2.82E-02            | ALG10B    | -             | 5.56E-07 | N/A      | N/A      | 7781                            |  |
| 3     | rs9211     | 12914546 | 7.97E-01       | IQSEC1   | 9     | rs7037974  | 1.17E+08 | 9.47E-01            | 1-Dec     | -             | 5.56E-07 | 3.00E-01 | 1.25E-05 | 7782                            |  |
| 2     | rs9283527  | 2.15E+08 | 4.89E-01       | SPAG16   | 14    | rs243296   | 32796044 | 2.33E-01            | NPAS3     | -             | 5.56E-07 | 8.31E-01 | 2.44E-04 | 7783                            |  |
| 5     | rs11742240 | 35917133 | 2.68E-01       | IL7R     | 21    | rs2091895  | 40993998 | 1.65E-01            | DSCAM     | -             | 5.56E-07 | 8.60E-01 | 4.84E-04 | 7784                            |  |
| 11    | rs10458992 | 1.25E+08 | 2.95E-01       | CDON     | 12    | rs1001127  | 6472004  | 6.42E-01            | MRPL51    | -             | 5.56E-07 | N/A      | N/A      | 7785                            |  |
| 1     | rs1360564  | 1.08E+08 | 3.42E-01       | VAV3     | 4     | rs6850861  | 1.78E+08 | 8.83E-01            | NEIL3     | -             | 5.56E-07 | N/A      | N/A      | 7786                            |  |
| 9     | rs2295932  | 1.01E+08 | 6.78E-01       | N/A      | 16    | rs2967875  | 83193101 | 2.17E-01            | COTL1     | -             | 5.56E-07 | 1.14E-01 | 7.85E-07 | 7787                            |  |
| 6     | rs9389037  | 1.33E+08 | 9.95E-01       | N/A      | 16    | rs1566458  | 83576432 | 5.21E-01            | ZDHHC7    | -             | 5.56E-07 | 1.84E-01 | 3.72E-03 | 7788                            |  |
| 6     | rs9375927  | 1.33E+08 | 9.95E-01       | N/A      | 16    | rs1566458  | 83576432 | 5.21E-01            | ZDHHC7    | -             | 5.56E-07 | 2.37E-01 | 2.72E-03 | 7789                            |  |
| 18    | rs1540028  | 69386571 | 9.71E-01       | N/A      | 19    | rs4453628  | 2416737  | 1.74E-01            | LMNB2     | -             | 5.56E-07 | 3.60E-01 | 2.04E-05 | 7790                            |  |
| 6     | rs9344674  | 87859142 | 3.70E-01       | CGA      | 11    | rs6589485  | 1.15E+08 | 2.27E-01            | CADM1     | -             | 5.56E-07 | 6.06E-01 | 2.51E-05 | 7791                            |  |
| 10    | rs6599700  | 1.25E+08 | 9.00E-01       | N/A      | 21    | rs2826601  | 21193520 | 8.89E-01            | N/A       | -             | 5.56E-07 | 6.22E-01 | 3.02E-05 | 7792                            |  |
| 1     | rs7513079  | 12708081 | 3.33E-01       | AADACL3  | 8     | rs2741098  | 6677686  | 2.86E-01            | XKR5      | -             | 5.56E-07 | 9.55E-01 | 6.15E-05 | 7793                            |  |
| 7     | rs10281326 | 1.47E+08 | 3.71E-01       | CNTN/AP2 | 11    | rs16831    | 1.27E+08 | 6.34E-01            | N/A       | -             | 5.56E-07 | 9.71E-01 | 1.74E-04 | 7794                            |  |
| 3     | rs7639399  | 14358820 | 6.42E-01       | N/A      | 5     | rs257244   | 97378881 | 7.60E-01            | N/A       | -             | 5.56E-07 | N/A      | N/A      | 7795                            |  |
| 8     | rs2977391  | 59257784 | 4.73E-01       | N/A      | 20    | rs1170004E | 6033006  | 4.64E-01            | FERMT1    | -             | 5.56E-07 | 1.60E-01 | 1.98E-05 | 7796                            |  |
| 8     | rs2977391  | 59257784 | 4.73E-01       | N/A      | 20    | rs11700084 | 6033216  | 4.64E-01            | FERMT1    | -             | 5.56E-07 | 1.91E-01 | 2.64E-05 | 7797                            |  |
| 3     | rs10934586 | 1.24E+08 | 8.37E-01       | CCDC58   | 10    | rs7086109  | 1.15E+08 | 9.73E-01            | N/A       | -             | 5.56E-07 | 2.71E-01 | 6.02E-06 | 7798                            |  |
| 5     | rs1482483  | 1.13E+08 | 9.00E-01       | N/A      | 1     |            |          |                     |           |               |          |          |          |                                 |  |

| SNP A |            |          |                |          | SNP B |            |          |                     |           | Interaction P |          |          | Ranking  | Cluster in top 100 interactions |  |
|-------|------------|----------|----------------|----------|-------|------------|----------|---------------------|-----------|---------------|----------|----------|----------|---------------------------------|--|
| CHR   | SNP        | Location | gle locus P va | Gene     | CHR   | SNP        | Location | single locus P valu | Gene      | MHC region    | Stage 1  | Stage 2  | Combined |                                 |  |
| 3     | rs717478   | 21240113 | 4.43E-01       | N/A      | 17    | rs4790519  | 3403485  | 2.02E-01            | TRPV3     | -             | 5.58E-07 | 5.66E-01 | 3.99E-04 | 7839                            |  |
| 6     | rs6900214  | 67144853 | 4.90E-01       | N/A      | 17    | rs562992   | 1.1E+08  | 7.11E-02            | COL4A1    | -             | 5.58E-07 | 6.11E-01 | 1.45E-04 | 7840                            |  |
| 6     | rs2146342  | 11310343 | 3.55E-01       | NEDD9    | 3     | rs12539524 | 22081979 | 3.34E-01            | N/A       | -             | 5.58E-07 | 1.53E-01 | 1.95E-03 | 7841                            |  |
| 5     | rs2132502  | 18712631 | 7.05E-01       | N/A      | 8     | rs1531590  | 76198999 | 9.00E-01            | N/A       | -             | 5.58E-07 | 6.41E-01 | 1.45E-03 | 7842                            |  |
| 2     | rs1859712  | 1.02E+08 | 7.93E-01       | MAP4K4   | 16    | rs11076066 | 53632581 | 8.63E-02            | N/A       | -             | 5.58E-07 | 7.23E-01 | 1.88E-04 | 7843                            |  |
| 11    | rs7129746  | 38870235 | 2.67E-01       | N/A      | 13    | rs4772971  | 1.08E+08 | 5.04E-01            | N/A       | -             | 5.58E-07 | 7.40E-01 | 2.95E-05 | 7844                            |  |
| 8     | rs6981109  | 82102994 | 7.81E-01       | PAG1     | 20    | rs6088301  | 31833015 | 7.29E-01            | ZNF341    | -             | 5.59E-07 | 8.66E-02 | 4.44E-07 | 7845                            |  |
| 11    | rs2566231  | 4491658  | 5.06E-01       | N/A      | 18    | rs2322094  | 5427967  | 1.18E-01            | EPB41L3   | -             | 5.59E-07 | 6.14E-01 | 5.80E-05 | 7846                            |  |
| 2     | rs954845   | 6804068  | 2.36E-01       | N/A      | 15    | rs6598321  | 98646388 | 5.98E-01            | ADAMTS17  | -             | 5.59E-07 | N/A      | N/A      | 7847                            |  |
| 7     | rs2190930  | 1.24E+08 | 6.60E-01       | N/A      | 10    | rs1747677  | 1.06E+08 | 9.81E-01            | COL17A1   | -             | 5.59E-07 | 1.08E-01 | 1.36E-06 | 7848                            |  |
| 2     | rs3769185  | 1.74E+08 | 7.80E-01       | ZAK      | 18    | rs4539677  | 43190135 | 4.57E-01            | N/A       | -             | 5.59E-07 | 1.13E-01 | 5.23E-03 | 7849                            |  |
| 6     | rs3130453  | 31232828 | 5.90E-01       | TCF19    | 6     | rs1131896  | 31487094 | 3.40E-01            | MICA      | MHC           | 5.59E-07 | 4.22E-01 | 4.67E-04 | 7850                            |  |
| 2     | rs744556   | 1.9E+08  | 7.77E-01       | WDR75    | 8     | rs2200330  | 20299494 | 2.05E-01            | N/A       | -             | 5.59E-07 | 7.13E-01 | 5.93E-05 | 7851                            |  |
| 1     | rs3790843  | 1.98E+08 | 4.74E-01       | NR5A2    | 2     | rs1517499  | 2.26E+08 | 8.86E-01            | KIAA1486  | -             | 5.59E-07 | 2.20E-01 | 2.14E-06 | 7852                            |  |
| 2     | rs295789   | 1.57E+08 | 2.70E-01       | N/A      | 9     | rs6479604  | 97150069 | 8.31E-01            | N/A       | -             | 5.59E-07 | 9.52E-01 | 4.06E-05 | 7853                            |  |
| 2     | rs295793   | 1.57E+08 | 2.70E-01       | N/A      | 9     | rs6479604  | 97150069 | 8.31E-01            | N/A       | -             | 5.59E-07 | 9.74E-01 | 4.37E-05 | 7854                            |  |
| 2     | rs295800   | 1.57E+08 | 2.70E-01       | N/A      | 9     | rs6479604  | 97150069 | 8.31E-01            | N/A       | -             | 5.59E-07 | 9.74E-01 | 4.37E-05 | 7855                            |  |
| 4     | rs13110363 | 1.63E+08 | 2.81E-01       | FSTL5    | 13    | rs1151375  | 1.01E+08 | 8.61E-02            | N/ALCN    | -             | 5.59E-07 | 6.84E-01 | 1.73E-05 | 7856                            |  |
| 13    | rs9510171  | 21858130 | 4.89E-01       | N/A      | 15    | rs8030397  | 31731603 | 1.79E-01            | RYR3      | -             | 5.59E-07 | 1.88E-01 | 8.53E-04 | 7857                            |  |
| 7     | rs6460664  | 70638550 | 2.18E-01       | WBSCR17  | 16    | rs750950   | 86430748 | 8.59E-01            | SLC7A5    | -             | 5.59E-07 | 6.53E-01 | 7.88E-04 | 7858                            |  |
| 11    | rs4755969  | 45306615 | 3.46E-01       | N/A      | 22    | rs926331   | 35840018 | 4.51E-01            | TMPPSS6   | -             | 5.59E-07 | 3.92E-01 | 1.25E-03 | 7859                            |  |
| 12    | rs1395342  | 51085568 | 7.06E-01       | KRT75    | 14    | rs8010709  | 50365250 | 3.15E-02            | NIN       | -             | 5.59E-07 | 6.85E-01 | 7.56E-05 | 7860                            |  |
| 8     | rs11136655 | 3585782  | 7.74E-03       | CSMD1    | 8     | rs4875302  | 4028885  | 2.97E-01            | CSMD1     | -             | 5.59E-07 | 8.18E-01 | 1.12E-04 | 7861                            |  |
| 6     | rs7742508  | 70834071 | 2.99E-01       | COL19A1  | 8     | rs2294119  | 1.45E+08 | 1.95E-02            | ZC3H3     | -             | 5.59E-07 | 5.28E-01 | 1.04E-04 | 7862                            |  |
| 5     | rs1348473  | 1.2E+08  | 8.23E-01       | N/A      | 14    | rs1958055  | 33254537 | 4.21E-01            | NPAS3     | -             | 5.59E-07 | 5.18E-02 | 1.20E-07 | 7863                            |  |
| 14    | rs11157994 | 53521052 | 6.80E-01       | N/A      | 18    | rs7506045  | 11977272 | 3.81E-01            | IMPA2     | -             | 5.59E-07 | 5.39E-01 | 2.53E-05 | 7864                            |  |
| 1     | rs4240918  | 2.15E+08 | 6.52E-01       | N/A      | 10    | rs1002936  | 5725215  | 1.03E-01            | ASB13     | -             | 5.59E-07 | 2.96E-01 | 4.06E-04 | 7865                            |  |
| 10    | rs7090538  | 1.27E+08 | 7.36E-01       | CTBP2    | 18    | rs1380711  | 71644131 | 6.79E-02            | N/A       | -             | 5.60E-07 | 5.72E-01 | 1.84E-04 | 7866                            |  |
| 10    | rs7090538  | 1.27E+08 | 7.36E-01       | CTBP2    | 18    | rs1150915  | 71645804 | 6.79E-02            | N/A       | -             | 5.60E-07 | 6.04E-01 | 1.67E-04 | 7867                            |  |
| 2     | rs12618856 | 2515922  | 7.68E-01       | N/A      | 11    | rs10833362 | 20565955 | 7.18E-01            | SLC6A5    | -             | 5.60E-07 | 6.06E-01 | 5.97E-05 | 7868                            |  |
| 10    | rs666101   | 14468193 | 1.20E-01       | N/A      | 13    | rs7336806  | 26487593 | 9.23E-01            | N/A       | -             | 5.60E-07 | N/A      | N/A      | 7869                            |  |
| 4     | rs4495109  | 55611307 | 9.13E-01       | N/A      | 16    | rs3855650  | 65016360 | 9.39E-01            | BEAN      | -             | 5.60E-07 | N/A      | N/A      | 7870                            |  |
| 5     | rs4868506  | 1.75E+08 | 8.40E-01       | N/A      | 7     | rs4449730  | 1.32E+08 | 5.62E-04            | N/A       | -             | 5.60E-07 | 1.01E-02 | 4.07E-02 | 7871                            |  |
| 2     | rs10179483 | 2.04E+08 | 8.49E-01       | N/A      | 12    | rs537938   | 3264359  | 8.36E-01            | TSPAN9    | -             | 5.60E-07 | 1.86E-01 | 1.87E-06 | 7872                            |  |
| 3     | rs4575830  | 34938207 | 2.88E-01       | N/A      | 8     | rs4925813  | 1.46E+08 | 3.21E-01            | KIAA1688  | -             | 5.60E-07 | 6.75E-01 | 5.50E-05 | 7873                            |  |
| 6     | rs3018     | 5883367  | 9.10E-01       | N/A      | 2     | rs4668879  | 15221205 | 8.99E-01            | NBAS      | -             | 5.60E-07 | 9.32E-01 | 4.88E-04 | 7874                            |  |
| 2     | rs7425902  | 2.39E+08 | 2.54E-01       | N/A      | 14    | rs1014959  | 23263944 | 6.60E-01            | N/A       | -             | 5.60E-07 | 3.05E-01 | 8.06E-04 | 7875                            |  |
| 9     | rs7035562  | 1.25E+08 | 2.52E-01       | CRB2     | 14    | rs17113911 | 42671419 | 5.97E-01            | N/A       | -             | 5.60E-07 | 2.44E-01 | 1.78E-03 | 7876                            |  |
| 1     | rs2224648  | 1.96E+08 | 3.54E-01       | N/A      | 10    | rs3780960  | 17727559 | 3.96E-01            | STAM      | -             | 5.60E-07 | 8.23E-01 | 1.90E-04 | 7877                            |  |
| 8     | rs7465378  | 1.43E+08 | 4.91E-01       | N/A      | 15    | rs2542597  | 84117079 | 9.10E-01            | MIR1276   | -             | 5.60E-07 | 1.62E-01 | 9.63E-04 | 7878                            |  |
| 3     | rs2071387  | 1.41E+08 | 6.07E-01       | RBP1     | 4     | rs12647533 | 39433024 | 6.34E-01            | UBE2K     | -             | 5.60E-07 | 9.10E-01 | 6.01E-05 | 7879                            |  |
| 3     | rs2071387  | 1.41E+08 | 6.07E-01       | RBP1     | 4     | rs724256   | 39424302 | 6.34E-01            | UBE2K     | -             | 5.60E-07 | 9.10E-01 | 6.01E-05 | 7880                            |  |
| 2     | rs2001427  | 22951846 | 4.97E-01       | N/A      | 10    | rs2092833  | 83239996 | 4.15E-01            | N/A       | -             | 5.60E-07 | N/A      | N/A      | 7881                            |  |
| 7     | rs4728178  | 1.29E+08 | 3.28E-01       | N/A      | 14    | rs1712689  | 53317833 | 6.46E-01            | N/A       | -             | 5.60E-07 | 7.89E-01 | 2.39E-05 | 7882                            |  |
| 1     | rs10917811 | 1.62E+08 | 8.49E-02       | N/A      | 4     | rs17590593 | 1.14E+08 | 7.24E-01            | ANK2      | -             | 5.60E-07 | 5.67E-02 | 3.94E-03 | 7883                            |  |
| 6     | rs332496   | 93512596 | 3.60E-01       | N/A      | 8     | rs3862107  | 16960135 | 5.76E-01            | EFHA2     | -             | 5.60E-07 | 3.31E-01 | 8.93E-04 | 7884                            |  |
| 2     | rs1843758  | 1.73E+08 | 8.06E-01       | N/A      | 4     | rs1490452  | 44003304 | 8.80E-01            | KCTD8     | -             | 5.60E-07 | 5.13E-01 | 9.01E-04 | 7885                            |  |
| 5     | rs4700752  | 1.78E+08 | 5.38E-01       | N/A      | 7     | rs12537447 | 10854274 | 3.29E-01            | N/A       | -             | 5.60E-07 | 5.76E-01 | 1.18E-05 | 7886                            |  |
| 5     | rs4700971  | 1.78E+08 | 5.38E-01       | N/A      | 7     | rs12537447 | 10854274 | 3.29E-01            | N/A       | -             | 5.60E-07 | 5.76E-01 | 1.18E-05 | 7887                            |  |
| 15    | rs4984516  | 94529167 | 6.68E-01       | N/A      | 16    | rs3785220  | 7644364  | 7.76E-01            | A2BP1     | -             | 5.61E-07 | 5.62E-01 | 1.36E-05 | 7888                            |  |
| 3     | rs860309   | 1.96E+08 | 1.06E-01       | N/A      | 9     | rs7038375  | 80865574 | 3.30E-01            | N/A       | -             | 5.61E-07 | 7.31E-01 | 1.28E-03 | 7889                            |  |
| 9     | rs10760165 | 1.23E+08 | 9.87E-01       | GSN      | 13    | rs928021   | 69604009 | 4.49E-01            | ATXN8OS   | -             | 5.61E-07 | 7.24E-01 | 2.67E-04 | 7890                            |  |
| 3     | rs1370743  | 1.22E+08 | 5.55E-01       | N/A      | 5     | rs6595591  | 1.25E+08 | 2.60E-01            | N/A       | -             | 5.61E-07 | 7.65E-02 | 1.89E-06 | 7891                            |  |
| 5     | rs10064418 | 1.25E+08 | 1.27E-01       | N/A      | 10    | rs1051005  | 1.21E+08 | 3.38E-01            | N/A       | -             | 5.61E-07 | 3.07E-01 | 1.27E-03 | 7892                            |  |
| 4     | rs1491380  | 23364356 | 9.87E-01       | N/A      | 16    | rs3912990  | 53192399 | 3.88E-01            | N/A       | -             | 5.61E-07 | 4.80E-01 | 1.70E-05 | 7893                            |  |
| 4     | rs11132603 | 1.9E+08  | 5.75E-01       | N/A      | 11    | rs1943761  | 1.01E+08 | 4.04E-01            | N/A       | -             | 5.61E-07 | 8.68E-01 | 2.14E-04 | 7894                            |  |
| 4     | rs2889670  | 1.9E+08  | 5.75E-01       | N/A      | 11    | rs1943761  | 1.01E+08 | 4.04E-01            | N/A       | -             | 5.61E-07 | 8.68E-01 | 2.14E-04 | 7895                            |  |
| 7     | rs10950803 | 2639592  | 4.18E-01       | IQCE     | 11    | rs2220086  | 83285502 | 2.06E-01            | DLG2      | -             | 5.61E-07 | 6.04E-01 | 2.39E-05 | 7896                            |  |
| 5     | rs3733989  | 1.68E+08 | 2.01E-01       | ODZ2     | 18    | rs4519422  | 71790009 | 5.10E-02            | N/A       | -             | 5.61E-07 | 7.32E-02 | 6.71E-07 | 7897                            |  |
| 6     | rs9352581  | 79003608 | 4.41E-01       | N/A      | 7     | rs765951   | 1.49E+08 | 7.40E-01            | N/A       | -             | 5.61E-07 | 1.90E-01 | 3.01E-06 | 7898                            |  |
| 6     | rs2817064  | 35849941 | 7.74E-01       | C6orf126 | 22    | rs565979   | 19358946 | 3.62E-01            | POM121L4P | MHC           | 5.61E-07 | 9.75E-01 | 6.29E-05 | 7899                            |  |
| 3     | rs6441419  | 1.63E+08 | 6.08E-01       | N/A      | 7     | rs1022936  | 43210547 | 3.33E-01            | HECW1     | -             | 5.61E-07 | 9.46E-02 | 5.77E-06 | 7900                            |  |
| 5     | rs6452162  | 23853128 | 4.72E-02       | N/A      | 10    | rs4748247  | 16167564 | 5.20E-01            | N/A       | -             | 5.61E-07 | 5.80E-01 | 5.40E-04 | 7901                            |  |
| 5     | rs12653782 | 1.56E+08 | 9.52E-01       | SGCD     | 17    | rs618743   | 73981463 | 7.14E-01            | DNAAH17   | -             | 5.61E-07 | 6.35E-01 | 1.36E-04 | 7902                            |  |
| 1     | rs4655724  | 67771577 | 4.44E-01       | N/A      | 12    | rs1471997  | 47009862 | 8.07E-01            | N/A       | -             | 5.61E-07 | 1.38E-01 | 4.30E-03 | 7903                            |  |
| 1     | rs7539855  | 67770721 | 4.44E-01       | N/A      | 12    | rs1471997  | 47009862 | 8.07E-01            | N/A       | -             | 5.61E-07 | 1.38E-01 | 4.30E-03 | 7904                            |  |
| 3     | rs6793237  | 2844449  | 7.92E-01       | CNTN4    | 22    | rs9614732  | 44408187 | 7.21E-02            | N/A       | -             | 5.61E-07 | 5.50E-01 | 5.80E-04 | 7905                            |  |
| 2     | rs2116435  | 54925978 | 2.30E-01       | EML6     | 16    | rs7186985  | 27156744 | 4.64E-01            | NSMCE1    | -             | 5.61E-07 | N/A      | N/A      | 7906                            |  |
| 9     | rs1591029  | 25488831 | 8.02E-01       | N/A      | 16    | rs899305   | 7140564  | 2.91E-01            | RBFox1    | -             | 5.61E-07 | 2.42E-03 | 1.52E-08 | 7907                            |  |
| 3     | rs2365794  | 20131306 | 5.03E-01       | KAT2B    | 12    | rs6538509  | 93474528 | 2.24E-01            | TMCC3     | -             | 5.61E-07 | 6.41E-01 | 3.71E-04 | 7908                            |  |
| 2     | rs4527188  | 2.22E+08 | 9.99E-02       | N/A      | 3     | rs1263398  | 126789   | 4.20E-01            | N/A       | -             | 5.62E-07 | 2.23E-01 | 1.36E-03 | 7909                            |  |
| 1     | rs10918897 | 1.67E+08 | 9.85E-01       | N/A      | 17    | rs11658364 | 5578000  | 7.47E-01            | N/A       | -             | 5.62E-07 | 3.04E-01 | 6.96E-04 | 7910                            |  |
| 6     | rs1325833  | 54004114 | 4.11E-01       | C6orf1   |       |            |          |                     |           |               |          |          |          |                                 |  |

| SNP A |            |           |                |           | SNP B |            |          |                    |          | Interaction P |          |          | Ranking  | Cluster in top 100 interactions |  |
|-------|------------|-----------|----------------|-----------|-------|------------|----------|--------------------|----------|---------------|----------|----------|----------|---------------------------------|--|
| CHR   | SNP        | Location  | gle locus P va | Gene      | CHR   | SNP        | Location | Single locus P val | Gene     | MHC region    | Stage 1  | Stage 2  | Combined |                                 |  |
| 7     | rs12532271 | 8132548   | 4.44E-02       | ICA1      | 7     | rs10255671 | 1.51E+08 | 4.48E-01           | CRYGN    | -             | 5.64E-07 | 2.06E-01 | 1.13E-05 | 7951                            |  |
| 4     | rs1909805  | 1.32E+08  | 7.22E-01       | N/A       | 4     | rs2114695  | 82661686 | 2.74E-01           | N/A      | -             | 5.64E-07 | 5.14E-01 | 8.65E-06 | 7952                            |  |
| 1     | rs12096993 | 2.18E+08  | 5.84E-01       | N/A       | 7     | rs1076283  | 1.49E+08 | 2.59E-01           | N/A      | -             | 5.64E-07 | 5.83E-01 | 9.14E-05 | 7953                            |  |
| 3     | rs557077   | 55506307  | 2.34E-01       | ERC2      | 3     | rs1249674  | 57167967 | 9.29E-01           | IL17RD   | -             | 5.64E-07 | 3.43E-01 | 5.99E-06 | 7954                            |  |
| 1     | rs4951090  | 2.03E+08  | 6.58E-01       | LRRN2     | 7     | rs2293935  | 1.03E+08 | 8.00E-01           | RELN     | -             | 5.64E-07 | 4.06E-01 | 9.45E-06 | 7955                            |  |
| 4     | rs17019139 | 93283210  | 8.24E-01       | N/A       | 15    | rs16967121 | 36710299 | 6.81E-01           | N/A      | -             | 5.64E-07 | 9.91E-01 | 1.07E-04 | 7956                            |  |
| 6     | rs624243   | 70977333  | 5.86E-01       | COL19A1   | 18    | rs2217127  | 33475628 | 3.01E-02           | N/A      | -             | 5.64E-07 | 8.52E-02 | 1.82E-03 | 7957                            |  |
| 6     | rs807515   | 24627865  | 6.59E-03       | ALDH5A1   | 7     | rs987252   | 51660260 | 8.05E-01           | N/A      | -             | 5.64E-07 | 7.14E-01 | 4.94E-05 | 7958                            |  |
| 2     | rs11685620 | 16039315  | 1.84E-01       | N/A       | 4     | rs11098092 | 1.12E+08 | 2.97E-01           | N/A      | -             | 5.64E-07 | 8.56E-01 | 2.77E-04 | 7959                            |  |
| 8     | rs7001469  | 15841353  | 3.68E-01       | N/A       | 16    | rs8043555  | 27685332 | 2.55E-01           | KIAA0556 | -             | 5.64E-07 | 9.67E-01 | 7.54E-05 | 7960                            |  |
| 10    | rs2710771  | 92431406  | 1.13E-01       | N/A       | 10    | rs181499   | 1.19E+08 | 4.00E-01           | N/A      | -             | 5.64E-07 | 2.27E-01 | 1.52E-06 | 7961                            |  |
| 3     | rs6766004  | 28988908  | 2.46E-01       | N/A       | 15    | rs1568657  | 81517183 | 7.10E-01           | BTBD1    | -             | 5.64E-07 | 2.67E-01 | 7.53E-04 | 7962                            |  |
| 7     | rs7809837  | 48692714  | 6.64E-01       | N/A       | 9     | rs12683811 | 79240630 | 8.39E-01           | GN/A14   | -             | 5.64E-07 | 3.65E-01 | 3.59E-03 | 7963                            |  |
| 6     | rs7769239  | 1.24E+08  | 4.56E-01       | TRDN      | 6     | rs1777220  | 1.26E+08 | 5.13E-01           | N/A      | -             | 5.64E-07 | 4.44E-01 | 4.49E-05 | 7964                            |  |
| 7     | rs741299   | 36319013  | 4.51E-01       | EEPDP1    | 18    | rs1849885  | 25192611 | 3.25E-01           | N/A      | -             | 5.64E-07 | N/A      | N/A      | 7965                            |  |
| 7     | rs537276   | 17491609  | 8.35E-01       | N/A       | 14    | rs4624074  | 33814177 | 7.11E-01           | N/A      | -             | 5.64E-07 | 7.04E-01 | 5.15E-05 | 7966                            |  |
| 5     | rs401681   | 1375087   | 9.51E-01       | CLPTM1L   | 17    | rs4251739  | 31172196 | 3.31E-01           | TAF15    | -             | 5.64E-07 | 9.18E-01 | 4.63E-04 | 7967                            |  |
| 9     | rs1486806  | 11737626  | 1.52E-01       | N/A       | 11    | rs3930459  | 7910534  | 7.59E-01           | OR10A6   | -             | 5.65E-07 | 4.03E-01 | 8.04E-06 | 7968                            |  |
| 9     | rs1486806  | 11737626  | 1.52E-01       | N/A       | 11    | rs7933807  | 7906367  | 7.59E-01           | OR10A6   | -             | 5.65E-07 | 4.03E-01 | 8.04E-06 | 7969                            |  |
| 2     | rs13024316 | 1.42E+08  | 9.16E-01       | LRP1B     | 7     | rs7789801  | 52063148 | 9.49E-01           | N/A      | -             | 5.65E-07 | 2.89E-01 | 2.56E-03 | 7970                            |  |
| 9     | rs2570961  | 8835429   | 1.69E-01       | PTPRD     | 22    | rs6008906  | 45330103 | 9.35E-01           | CELSR1   | -             | 5.65E-07 | 5.14E-01 | 9.38E-06 | 7971                            |  |
| 7     | rs923336   | 1.35E+08  | 2.18E-01       | N/A       | 13    | rs9318901  | 82198270 | 2.33E-01           | N/A      | -             | 5.65E-07 | 8.14E-01 | 2.69E-04 | 7972                            |  |
| 11    | rs10500628 | 4883523   | 1.97E-01       | OR51A7    | 22    | rs763217   | 43496258 | 6.23E-01           | PRR5     | -             | 5.65E-07 | N/A      | N/A      | 7973                            |  |
| 11    | rs10500629 | 4883261   | 1.97E-01       | OR51A7    | 22    | rs763217   | 43496258 | 6.23E-01           | PRR5     | -             | 5.65E-07 | N/A      | N/A      | 7974                            |  |
| 1     | rs10493817 | 88899475  | 6.20E-01       | N/A       | 16    | rs1787327  | 72734213 | 8.14E-02           | N/A      | -             | 5.65E-07 | 9.42E-01 | 1.19E-04 | 7975                            |  |
| 9     | rs4604527  | 84714389  | 9.85E-01       | N/A       | 9     | rs10991795 | 91843986 | 5.47E-01           | N/A      | -             | 5.65E-07 | 2.00E-02 | 2.24E-07 | 7976                            |  |
| 2     | rs1193629  | 1.76E+08  | 8.87E-01       | CHN1      | 5     | rs4455441  | 83232076 | 4.71E-01           | N/A      | -             | 5.65E-07 | 4.53E-01 | 2.94E-06 | 7977                            |  |
| 1     | rs1175111  | 1.9E+08   | 6.00E-01       | N/A       | 12    | rs17091714 | 41380669 | 4.95E-01           | N/A      | -             | 5.65E-07 | 5.88E-01 | 3.56E-06 | 7978                            |  |
| 2     | rs6755271  | 10427491  | 5.52E-01       | HPCAL1    | 14    | rs4901454  | 53372596 | 6.69E-01           | N/A      | -             | 5.65E-07 | 9.23E-01 | 1.17E-04 | 7979                            |  |
| 4     | rs13112125 | 1.25E+08  | 1.58E-01       | N/A       | 8     | rs4531042  | 60251242 | 1.76E-01           | N/A      | -             | 5.65E-07 | 2.84E-01 | 1.70E-03 | 7980                            |  |
| 13    | rs2164172  | 1.09E+08  | 4.20E-01       | N/A       | 18    | rs488173   | 32156598 | 7.31E-01           | FHOD3    | -             | 5.65E-07 | 6.20E-01 | 1.30E-05 | 7981                            |  |
| 2     | rs4123497  | 46876947  | 1.86E-01       | N/A       | 10    | rs16934605 | 54301082 | 4.91E-01           | N/A      | -             | 5.65E-07 | 6.92E-01 | 1.29E-04 | 7982                            |  |
| 14    | rs198230   | 56311203  | 5.16E-01       | N/A       | 17    | rs882847   | 4329478  | 9.30E-02           | SPNS2    | -             | 5.65E-07 | 8.31E-01 | 6.64E-05 | 7983                            |  |
| 9     | rs1332173  | 25490238  | 8.01E-01       | N/A       | 16    | rs899305   | 7140564  | 2.91E-01           | RBFOX1   | -             | 5.66E-07 | 2.42E-03 | 1.54E-08 | 7984                            |  |
| 6     | rs989467   | 1.02E+08  | 8.65E-01       | GRIK2     | 6     | rs13201016 | 1.57E+08 | 1.55E-01           | N/A      | -             | 5.66E-07 | 7.30E-02 | 1.22E-06 | 7985                            |  |
| 2     | rs4853388  | 78502930  | 9.45E-01       | N/A       | 9     | rs871807   | 1.16E+08 | 9.50E-01           | ZNF618   | -             | 5.66E-07 | 4.19E-01 | 5.05E-04 | 7986                            |  |
| 3     | rs3845917  | 1.23E+08  | 6.66E-01       | CASR      | 10    | rs2589446  | 56634203 | 2.40E-01           | N/A      | -             | 5.66E-07 | 6.12E-01 | 3.11E-04 | 7987                            |  |
| 1     | rs10749738 | 63565743  | 7.57E-01       | FOXO3     | 22    | rs4822836  | 25768108 | 5.39E-01           | N/A      | -             | 5.66E-07 | 9.95E-01 | 1.25E-04 | 7988                            |  |
| 2     | rs12621974 | 4871441   | 8.40E-02       | N/A       | 8     | rs7000712  | 1.33E+08 | 3.34E-01           | EFR3A    | -             | 5.66E-07 | 5.73E-01 | 8.38E-05 | 7989                            |  |
| 2     | rs4146018  | 1.24E+08  | 6.30E-01       | N/A       | 16    | rs1799004  | 87195552 | 6.57E-01           | ZC3H18   | -             | 5.66E-07 | 7.85E-01 | 9.92E-05 | 7990                            |  |
| 1     | rs922104   | 89814487  | 1.62E-01       | LRRC8B    | 7     | rs7793355  | 1.24E+08 | 2.39E-01           | N/A      | -             | 5.66E-07 | 3.37E-01 | 1.95E-03 | 7991                            |  |
| 7     | rs1994464  | 1.35E+08  | 1.78E-01       | N/A       | 13    | rs9318901  | 82198270 | 2.33E-01           | N/A      | -             | 5.66E-07 | 8.16E-01 | 2.61E-04 | 7992                            |  |
| 17    | rs12937692 | 39611956  | 4.58E-01       | C17orf65  | 19    | rs483808   | 7863481  | 2.21E-01           | N/A      | -             | 5.66E-07 | 8.74E-01 | 1.30E-04 | 7993                            |  |
| 2     | rs13014896 | 1.72E+08  | 7.20E-01       | GORASP2   | 8     | rs10956564 | 1.32E+08 | 5.01E-01           | ADCY8    | -             | 5.66E-07 | 1.27E-02 | 1.69E-07 | 7994                            |  |
| 10    | rs11013317 | 1.8611417 | 5.40E-01       | CACNB2    | 20    | rs2180377  | 24072082 | 9.55E-01           | N/A      | -             | 5.66E-07 | 3.89E-02 | 2.08E-07 | 7995                            |  |
| 6     | rs11754948 | 85759109  | 6.99E-01       | N/A       | 20    | rs1571167  | 53212274 | 2.49E-01           | N/A      | -             | 5.66E-07 | 2.07E-01 | 1.05E-03 | 7996                            |  |
| 11    | rs4936353  | 1.16E+08  | 5.80E-01       | N/A       | 14    | rs2877672  | 70106012 | 3.91E-01           | MED6     | -             | 5.66E-07 | 1.04E-01 | 5.75E-07 | 7997                            |  |
| 6     | rs4140634  | 1.2E+08   | 3.71E-01       | MAN1A1    | 4     | rs13125515 | 1.81E+08 | 9.22E-01           | N/A      | -             | 5.66E-07 | 4.39E-01 | 1.48E-05 | 7998                            |  |
| 13    | rs9543280  | 72700672  | 2.27E-02       | N/A       | 20    | rs4814019  | 11456980 | 3.96E-01           | N/A      | -             | 5.66E-07 | 9.13E-01 | 5.08E-04 | 7999                            |  |
| 2     | rs7561984  | 2.3E+08   | 4.76E-01       | PID1      | 3     | rs6442831  | 3795517  | 9.99E-02           | N/A      | -             | 5.67E-07 | 7.98E-02 | 3.87E-06 | 8000                            |  |
| 2     | rs7588090  | 2.3E+08   | 4.76E-01       | PID1      | 3     | rs6442831  | 3795517  | 9.99E-02           | N/A      | -             | 5.67E-07 | 7.98E-02 | 3.87E-06 | 8001                            |  |
| 10    | rs2170643  | 1.27E+08  | 6.44E-01       | MMP21     | 13    | rs449520   | 76001336 | 1.46E-02           | N/A      | -             | 5.67E-07 | 9.84E-01 | 5.82E-05 | 8002                            |  |
| 7     | rs17132513 | 2630740   | 8.24E-01       | IQCE      | 10    | rs11254336 | 17115579 | 4.70E-01           | CUBN     | -             | 5.67E-07 | 1.84E-01 | 1.33E-06 | 8003                            |  |
| 8     | rs10503236 | 3990061   | 8.99E-01       | CSMD1     | 16    | rs1599549  | 8085493  | 9.35E-01           | N/A      | -             | 5.67E-07 | 6.67E-01 | 2.79E-05 | 8004                            |  |
| 6     | rs3757340  | 31029861  | 5.23E-03       | DPCR1     | 6     | rs2223971  | 78703467 | 2.39E-01           | N/A      | MHC           | 5.67E-07 | 6.73E-01 | 2.11E-04 | 8005                            |  |
| 6     | rs7738087  | 939790    | 2.78E-01       | LOC285768 | 3     | rs6770575  | 68679728 | 3.20E-01           | FAM19A1  | -             | 5.67E-07 | 5.80E-02 | 4.46E-07 | 8006                            |  |
| 16    | rs7196682  | 25415341  | 9.46E-01       | N/A       | 17    | rs16951016 | 47559290 | 1.21E-01           | CA10     | -             | 5.67E-07 | 1.59E-01 | 7.98E-07 | 8007                            |  |
| 3     | rs9866656  | 20701727  | 9.76E-01       | N/A       | 12    | rs10160900 | 82187560 | 1.48E-01           | N/A      | -             | 5.67E-07 | 1.87E-01 | 3.36E-06 | 8008                            |  |
| 1     | rs2816062  | 18776489  | 1.09E-01       | N/A       | 13    | rs12869336 | 54242849 | 4.86E-01           | N/A      | -             | 5.67E-07 | 3.28E-01 | 1.09E-05 | 8009                            |  |
| 1     | rs931590   | 1.86E+08  | 1.70E-01       | N/A       | 17    | rs2109174  | 14454035 | 2.07E-01           | N/A      | -             | 5.67E-07 | 4.16E-01 | 9.37E-06 | 8010                            |  |
| 3     | rs12630901 | 84342357  | 9.03E-02       | N/A       | 13    | rs3015350  | 1.05E+08 | 3.67E-01           | N/A      | -             | 5.67E-07 | 5.71E-01 | 8.20E-05 | 8011                            |  |
| 12    | rs4767535  | 1.16E+08  | 7.84E-01       | NOS1      | 18    | rs4566256  | 31651305 | 6.99E-01           | N/A      | -             | 5.67E-07 | 7.42E-01 | 7.95E-05 | 8012                            |  |
| 2     | rs11901161 | 2.4E+08   | 6.64E-01       | N/A       | 13    | rs9559087  | 1.07E+08 | 9.50E-01           | FAM155A  | -             | 5.68E-07 | 4.07E-01 | 1.11E-03 | 8013                            |  |
| 1     | rs640692   | 1.74E+08  | 2.04E-01       | N/A       | 15    | rs491274   | 44656818 | 2.01E-01           | N/A      | -             | 5.68E-07 | 4.53E-01 | 4.29E-04 | 8014                            |  |
| 8     | rs2511692  | 1.04E+08  | 2.82E-01       | N/A       | 13    | rs7982613  | 75068514 | 7.59E-01           | UCHL3    | -             | 5.68E-07 | 5.94E-01 | 2.26E-05 | 8015                            |  |
| 11    | rs11608125 | 85598629  | 8.35E-01       | N/A       | 13    | rs7330967  | 52407458 | 1.83E-01           | N/A      | -             | 5.68E-07 | 9.80E-01 | 1.91E-04 | 8016                            |  |
| 6     | rs11154263 | 1.25E+08  | 2.17E-01       | NKAIN2    | 20    | rs1329820  | 16108141 | 9.79E-01           | N/A      | -             | 5.68E-07 | 4.23E-01 | 4.54E-05 | 8017                            |  |
| 3     | rs10222671 | 1.07E+08  | 3.47E-01       | N/A       | 16    | rs8062451  | 81558637 | 9.86E-01           | CDH13    | -             | 5.68E-07 | 1.64E-01 | 1.82E-06 | 8018                            |  |
| 4     | rs1486786  | 30261294  | 4.46E-01       | N/A       | 10    | rs2059996  | 77071681 | 6.20E-01           | N/A      | -             | 5.68E-07 | 3.65E-01 | 3.93E-03 | 8019                            |  |
| 14    | rs17115288 | 44098618  | 7.06E-01       | N/A       | 14    | rs7156399  | 95104682 | 7.38E-01           | N/A      | -             | 5.68E-07 | 4.12E-01 | 1.28E-04 | 8020                            |  |
| 6     | rs9397717  | 1.55E+08  | 6.24E-01       | CNKSR3    | 12    | rs1293739  | 1.12E+08 | 1.91E-01           | OAS2     | -             | 5.68E-07 | 5.58E-01 | 1.50E-04 | 8021                            |  |
| 7     | rs11975489 | 77814840  | 4.58E-02       | MAGI2     | 16    | rs3924409  | 84585738 | 4.64E-01           | N/A      | -             | 5.68E-07 | 7.39E-01 | 3.66E-05 | 8022                            |  |
| 11    | rs4        |           |                |           |       |            |          |                    |          |               |          |          |          |                                 |  |

| SNP A |            |          |                |         | SNP B |            |          |                     |             | Interaction P |          |          | Ranking  | Cluster in top 100 interactions |  |
|-------|------------|----------|----------------|---------|-------|------------|----------|---------------------|-------------|---------------|----------|----------|----------|---------------------------------|--|
| CHR   | SNP        | Location | gle locus P va | Gene    | CHR   | SNP        | Location | single locus P valu | Gene        | MHC region    | Stage 1  | Stage 2  | Combined |                                 |  |
| 11    | rs11232180 | 79914436 | 3.63E-01       | N/A     | 14    | rs6573656  | 65780836 | 7.09E-02            | N/A         | -             | 5.70E-07 | 2.31E-01 | 8.65E-03 | 8063                            |  |
| 3     | rs6789465  | 43907049 | 2.27E-01       | N/A     | 8     | rs3862082  | 17514969 | 2.66E-01            | PDGFRL      | -             | 5.70E-07 | 9.42E-02 | 1.12E-02 | 8064                            |  |
| 8     | rs3864665  | 62093567 | 7.26E-01       | N/A     | 22    | rs6001027  | 36875565 | 2.10E-01            | PLA2G6      | -             | 5.70E-07 | 5.28E-01 | 1.57E-05 | 8065                            |  |
| 6     | rs1343244  | 82133707 | 5.14E-01       | N/A     | 4     | rs2305949  | 55675213 | 6.54E-01            | KDR         | -             | 5.70E-07 | 4.04E-02 | 5.54E-03 | 8066                            |  |
| 6     | rs9352999  | 82125494 | 5.14E-01       | N/A     | 4     | rs2305949  | 55675213 | 6.54E-01            | KDR         | -             | 5.70E-07 | 4.04E-02 | 5.54E-03 | 8067                            |  |
| 4     | rs2868382  | 83756330 | 2.88E-01       | SCD5    | 9     | rs1358907  | 3158478  | 2.43E-01            | N/A         | -             | 5.70E-07 | 2.01E-01 | 2.37E-03 | 8068                            |  |
| 16    | rs12929721 | 82030355 | 1.07E-02       | CDH13   | 16    | rs731258   | 82271433 | 4.87E-01            | CDH13       | -             | 5.70E-07 | 4.98E-01 | 2.98E-04 | 8069                            |  |
| 6     | rs2504892  | 12667225 | 5.86E-01       | N/A     | 7     | rs1269867  | 67256918 | 8.26E-01            | N/A         | -             | 5.70E-07 | 8.99E-01 | 3.22E-05 | 8070                            |  |
| 4     | rs1563844  | 60541497 | 6.14E-01       | N/A     | 7     | rs2192017  | 1.22E+08 | 8.28E-01            | CADPS2      | -             | 5.70E-07 | 9.84E-01 | 1.80E-04 | 8071                            |  |
| 13    | rs953937   | 89320971 | 6.27E-01       | N/A     | 14    | rs1551013  | 84077293 | 1.21E-01            | N/A         | -             | 5.71E-07 | 2.57E-02 | 1.81E-07 | 8072                            |  |
| 1     | rs10889294 | 62402950 | 9.72E-01       | INADL   | 18    | rs7237761  | 958021   | 5.30E-01            | N/A         | -             | 5.71E-07 | 3.37E-01 | 4.05E-06 | 8073                            |  |
| 4     | rs10938692 | 8169461  | 3.72E-01       | ABLM2   | 20    | rs962814   | 55822433 | 3.92E-01            | N/A         | -             | 5.71E-07 | 2.82E-01 | 7.99E-04 | 8074                            |  |
| 4     | rs7670919  | 1.75E+08 | 6.73E-01       | N/A     | 8     | rs12677963 | 1.31E+08 | 7.69E-01            | N/A         | -             | 5.71E-07 | 6.32E-01 | 1.95E-05 | 8075                            |  |
| 4     | rs7670919  | 1.75E+08 | 6.73E-01       | N/A     | 8     | rs6470742  | 1.31E+08 | 7.69E-01            | N/A         | -             | 5.71E-07 | 6.51E-01 | 2.14E-05 | 8076                            |  |
| 8     | rs1825000  | 61372500 | 4.19E-01       | CA8     | 14    | rs2184282  | 19950000 | 9.09E-01            | TEP1        | -             | 5.71E-07 | 2.28E-01 | 1.15E-05 | 8077                            |  |
| 8     | rs7842871  | 61372013 | 4.19E-01       | CA8     | 14    | rs2184282  | 19950000 | 9.09E-01            | TEP1        | -             | 5.71E-07 | 2.28E-01 | 1.15E-05 | 8078                            |  |
| 5     | rs961536   | 75948599 | 9.95E-01       | IQGA2   | 8     | rs2223053  | 1.17E+08 | 2.97E-01            | N/A         | -             | 5.71E-07 | 7.81E-01 | 1.40E-04 | 8079                            |  |
| 12    | rs4763947  | 13261503 | 3.31E-02       | EMP1    | 20    | rs2423107  | 5433138  | 2.18E-01            | LOC149837   | -             | 5.71E-07 | 3.98E-01 | 1.48E-05 | 8080                            |  |
| 1     | rs4926345  | 68733064 | 5.87E-01       | DEPDC1  | 14    | rs17123886 | 87431359 | 4.36E-01            | N/A         | -             | 5.71E-07 | 5.96E-01 | 1.88E-04 | 8081                            |  |
| 1     | rs7527841  | 68708712 | 5.87E-01       | DEPDC1  | 14    | rs17123886 | 87431359 | 4.36E-01            | N/A         | -             | 5.71E-07 | 5.96E-01 | 1.88E-04 | 8082                            |  |
| 5     | rs4360024  | 77719962 | 5.37E-01       | SCAMP1  | 11    | rs1800849  | 73397813 | 6.34E-01            | UCP3        | -             | 5.71E-07 | 6.44E-01 | 2.79E-05 | 8083                            |  |
| 2     | rs10932374 | 2.12E+08 | 3.38E-01       | ERBB4   | 13    | rs9517097  | 97307303 | 1.40E-01            | N/A         | -             | 5.71E-07 | 6.83E-01 | 4.16E-05 | 8084                            |  |
| 4     | rs1435313  | 1.34E+08 | 6.31E-01       | N/A     | 14    | rs17124065 | 51054331 | 1.13E-01            | FRMD6       | -             | 5.71E-07 | 1.69E-01 | 4.81E-06 | 8085                            |  |
| 11    | rs10891201 | 1.1E+08  | 4.36E-01       | N/A     | 19    | rs7507911  | 7249095  | 2.70E-01            | INSR        | -             | 5.71E-07 | 9.16E-01 | 4.64E-04 | 8086                            |  |
| 1     | rs12082808 | 2.37E+08 | 1.05E-01       | N/A     | 4     | rs6842810  | 1.43E+08 | 9.88E-01            | N/A         | -             | 5.71E-07 | 3.34E-01 | 2.40E-04 | 8087                            |  |
| 5     | rs216535   | 1.11E+08 | 6.28E-01       | CAMK4   | 9     | rs7035592  | 27224029 | 1.27E-01            | NCRN/A00032 | -             | 5.71E-07 | 5.57E-01 | 1.85E-04 | 8088                            |  |
| 1     | rs10874095 | 80101868 | 1.24E-01       | N/A     | 10    | rs10795055 | 3582082  | 5.85E-01            | N/A         | -             | 5.71E-07 | 7.22E-02 | 1.76E-06 | 8089                            |  |
| 4     | rs4385097  | 63426495 | 8.33E-01       | N/A     | 16    | rs9928573  | 10728243 | 9.73E-01            | NUPB1       | -             | 5.71E-07 | 3.08E-01 | 1.05E-03 | 8090                            |  |
| 12    | rs7296020  | 61595594 | 4.84E-01       | PPM1H   | 13    | rs1411517  | 91448474 | 7.42E-01            | GPC5        | -             | 5.71E-07 | 9.13E-01 | 2.47E-04 | 8091                            |  |
| 3     | rs7648830  | 66997448 | 8.94E-02       | N/A     | 10    | rs1113313  | 76683707 | 5.97E-01            | COMTD1      | -             | 5.71E-07 | 9.39E-01 | 4.65E-05 | 8092                            |  |
| 3     | rs1154631  | 16667935 | 3.44E-01       | N/A     | 8     | rs10505328 | 1.19E+08 | 8.38E-01            | N/A         | -             | 5.72E-07 | 2.45E-01 | 7.16E-04 | 8093                            |  |
| 12    | rs7959574  | 96615419 | 5.75E-01       | N/A     | 15    | rs12915731 | 30871133 | 4.53E-02            | FMN1        | -             | 5.72E-07 | 3.99E-01 | 6.22E-04 | 8094                            |  |
| 8     | rs7003858  | 20046275 | 5.18E-01       | SLC18A1 | 15    | rs12595143 | 51572775 | 5.95E-01            | N/A         | -             | 5.72E-07 | 4.97E-01 | 1.17E-05 | 8095                            |  |
| 11    | rs1528658  | 13946856 | 7.85E-02       | SPON1   | 14    | rs3829948  | 92186579 | 5.37E-01            | RIN3        | -             | 5.72E-07 | 2.63E-01 | 4.25E-05 | 8096                            |  |
| 6     | rs1888274  | 53040467 | 5.50E-01       | FBXO9   | 3     | rs10936353 | 1.65E+08 | 7.88E-01            | N/A         | -             | 5.72E-07 | 6.38E-01 | 3.74E-05 | 8097                            |  |
| 5     | rs10515804 | 1.59E+08 | 2.53E-03       | TTX1    | 10    | rs7895170  | 1.16E+08 | 3.54E-01            | DCLRE1A     | -             | 5.72E-07 | 1.70E-01 | 2.59E-06 | 8098                            |  |
| 10    | rs7917581  | 73851763 | 6.43E-01       | MIR1256 | 15    | rs4522364  | 48129516 | 5.11E-02            | ATP8B4      | -             | 5.72E-07 | 2.97E-01 | 5.18E-03 | 8099                            |  |
| 2     | rs2311552  | 1.12E+08 | 3.74E-01       | N/A     | 8     | rs7002414  | 62820244 | 8.72E-01            | N/A         | -             | 5.72E-07 | 3.53E-01 | 5.79E-06 | 8100                            |  |
| 7     | rs2464614  | 3590577  | 2.15E-01       | SDK1    | 19    | rs7414448  | 34429788 | 7.00E-01            | N/A         | -             | 5.72E-07 | 5.27E-01 | 5.59E-04 | 8101                            |  |
| 9     | rs1933679  | 95748843 | 8.26E-01       | BARX1   | 11    | rs4939456  | 60319217 | 3.57E-02            | MS4A10      | -             | 5.72E-07 | 1.06E-01 | 2.44E-06 | 8102                            |  |
| 1     | rs12407446 | 1.57E+08 | 6.61E-01       | CD1A    | 18    | rs1940435  | 407559   | 6.83E-01            | COLEC12     | -             | 5.72E-07 | 7.48E-01 | 1.10E-04 | 8103                            |  |
| 6     | rs1876155  | 1.01E+08 | 7.67E-01       | N/A     | 1     | rs4233164  | 1.74E+08 | 5.50E-01            | TNR         | -             | 5.72E-07 | 5.93E-01 | 1.21E-04 | 8104                            |  |
| 5     | rs4502857  | 1.2E+08  | 2.78E-01       | N/A     | 11    | rs1982496  | 1.06E+08 | 2.75E-01            | GUCY1A2     | -             | 5.73E-07 | 9.60E-01 | 1.15E-04 | 8105                            |  |
| 2     | rs2033137  | 1.85E+08 | 5.32E-01       | N/A     | 3     | rs9789945  | 31452286 | 4.10E-01            | N/A         | -             | 5.73E-07 | 2.33E-01 | 5.18E-06 | 8106                            |  |
| 7     | rs4732134  | 1.35E+08 | 6.11E-01       | NUP205  | 13    | rs2419887  | 25549661 | 7.29E-01            | N/A         | -             | 5.73E-07 | 7.96E-01 | 6.55E-05 | 8107                            |  |
| 1     | rs10803421 | 13829071 | 8.81E-01       | PDPN    | 11    | rs12364154 | 70029656 | 5.09E-01            | SHANK2      | -             | 5.73E-07 | 4.83E-01 | 2.21E-06 | 8108                            |  |
| 6     | rs9385975  | 1.01E+08 | 6.33E-01       | MCHR2   | 11    | rs10791957 | 67624124 | 6.97E-02            | CHKA        | -             | 5.73E-07 | 7.14E-01 | 6.75E-05 | 8109                            |  |
| 2     | rs4954112  | 1.35E+08 | 8.12E-01       | N/A     | 21    | rs2832392  | 29840088 | 2.51E-01            | GRIK1       | -             | 5.73E-07 | 6.92E-01 | 1.27E-05 | 8110                            |  |
| 2     | rs10184017 | 2658488  | 4.51E-01       | N/A     | 14    | rs10142843 | 28784615 | 8.66E-01            | N/A         | -             | 5.73E-07 | 9.51E-01 | 2.83E-05 | 8111                            |  |
| 8     | rs10441655 | 13794892 | 3.21E-01       | N/A     | 12    | rs1114975  | 80888517 | 4.17E-01            | PPFIA2      | -             | 5.73E-07 | 1.38E-01 | 1.71E-03 | 8112                            |  |
| 1     | rs2821330  | 1.98E+08 | 1.67E-02       | NR5A2   | 2     | rs7587759  | 1.99E+08 | 6.59E-01            | N/A         | -             | 5.73E-07 | 4.70E-01 | 1.09E-03 | 8113                            |  |
| 8     | rs1033345  | 1248521  | 4.69E-01       | N/A     | 13    | rs9554684  | 99838057 | 6.66E-01            | PCCA        | -             | 5.73E-07 | 8.89E-01 | 3.14E-05 | 8114                            |  |
| 8     | rs754539   | 18631372 | 5.96E-01       | PSD3    | 18    | rs12607553 | 26841557 | 7.22E-01            | DSC3        | -             | 5.73E-07 | 9.78E-01 | 6.22E-05 | 8115                            |  |
| 1     | rs202248   | 1.66E+08 | 7.63E-01       | DCAF6   | 18    | rs732034   | 13793344 | 6.02E-01            | N/A         | -             | 5.74E-07 | 4.96E-01 | 1.15E-05 | 8116                            |  |
| 16    | rs4787394  | 26874852 | 3.03E-01       | N/A     | 20    | rs17770331 | 1563308  | 9.57E-01            | SIRPB1      | -             | 5.74E-07 | 6.40E-01 | 5.42E-04 | 8117                            |  |
| 6     | rs9385975  | 1.01E+08 | 6.33E-01       | MCHR2   | 11    | rs7928739  | 67590119 | 9.00E-02            | CHKA        | -             | 5.74E-07 | 7.14E-01 | 6.39E-05 | 8118                            |  |
| 1     | rs4844678  | 2.07E+08 | 7.95E-02       | N/A     | 10    | rs715687   | 84561933 | 8.55E-01            | NRG3        | -             | 5.74E-07 | 8.84E-01 | 1.14E-04 | 8119                            |  |
| 10    | rs3858304  | 1.32E+08 | 5.58E-01       | N/A     | 20    | rs8114499  | 8069097  | 9.79E-01            | PLCB1       | -             | 5.74E-07 | 5.60E-01 | 3.92E-05 | 8120                            |  |
| 7     | rs7793289  | 13073946 | 6.14E-02       | N/A     | 19    | rs4801457  | 62485375 | 9.79E-01            | ZNF460      | -             | 5.74E-07 | 5.52E-01 | 8.38E-06 | 8121                            |  |
| 7     | rs2160193  | 13070161 | 6.14E-02       | N/A     | 19    | rs4801457  | 62485375 | 9.79E-01            | ZNF460      | -             | 5.74E-07 | 5.71E-01 | 9.30E-06 | 8122                            |  |
| 9     | rs2417226  | 1.03E+08 | 2.10E-01       | N/A     | 14    | rs1956218  | 32144994 | 4.70E-02            | AKAP6       | -             | 5.74E-07 | 8.81E-01 | 6.57E-05 | 8123                            |  |
| 2     | rs6746998  | 2.09E+08 | 1.89E-01       | N/A     | 7     | rs6461503  | 20527521 | 1.19E-01            | N/A         | -             | 5.74E-07 | 4.48E-01 | 5.00E-04 | 8124                            |  |
| 14    | rs10147954 | 66486836 | 1.29E-02       | GPHN    | 16    | rs12449282 | 10265020 | 5.28E-01            | N/A         | -             | 5.74E-07 | 9.62E-01 | 1.90E-04 | 8125                            |  |
| 1     | rs4652795  | 1.82E+08 | 7.52E-01       | NMN/AT2 | 8     | rs6994396  | 1.15E+08 | 8.90E-01            | N/A         | -             | 5.74E-07 | 2.58E-01 | 9.09E-06 | 8126                            |  |
| 6     | rs2508015  | 31118179 | 8.45E-01       | HCG22   | 6     | rs4495304  | 31188697 | 4.80E-02            | C6orf115    | MHC           | 5.74E-07 | 1.09E-02 | 1.06E-07 | 8127                            |  |
| 2     | rs6726480  | 2.05E+08 | 8.63E-01       | PARD3B  | 19    | rs4807863  | 6257971  | 8.37E-02            | ACER1       | -             | 5.74E-07 | 2.28E-01 | 4.33E-06 | 8128                            |  |
| 6     | rs1570155  | 20490579 | 3.98E-02       | E2F3    | 18    | rs1587989  | 60554118 | 8.65E-01            | N/A         | -             | 5.74E-07 | 1.01E-01 | 1.25E-06 | 8129                            |  |
| 3     | rs7624435  | 97082944 | 2.66E-01       | N/A     | 12    | rs10784285 | 60844581 | 2.64E-01            | FAM19A2     | -             | 5.74E-07 | 1.10E-01 | 2.84E-03 | 8130                            |  |
| 2     | rs2528626  | 1.59E+08 | 1.37E-01       | N/A     | 20    | rs2249634  | 54904032 | 1.71E-01            | N/A         | -             | 5.74E-07 | 2.98E-01 | 2.75E-06 | 8131                            |  |
| 7     | rs2714862  | 17914665 | 3.91E-01       | SNX13   | 14    | rs734606   | 94272240 | 2.92E-01            | N/A         | -             | 5.74E-07 | 3.55E-01 | 1.95E-03 | 8132                            |  |
| 7     | rs2714862  | 17914665 | 3.91E-01       | SNX13   | 14    | rs8006054  | 94273061 | 2.92E-01            | N/A         | -             | 5.74E-07 | 3.55E-01 | 1.95E-03 | 8133                            |  |
| 8     | rs10108007 | 61310616 | 4.24E-01       | CA8     | 16    | rs1862746  | 59019859 | 7.18E               |             |               |          |          |          |                                 |  |

| SNP A |            |          |                |          | SNP B |            |          |                     |           | Interaction P |          |          | Ranking  | Cluster in top 100 interactions |  |
|-------|------------|----------|----------------|----------|-------|------------|----------|---------------------|-----------|---------------|----------|----------|----------|---------------------------------|--|
| CHR   | SNP        | Location | gle locus P va | Gene     | CHR   | SNP        | Location | single locus P valu | Gene      | MHC region    | Stage 1  | Stage 2  | Combined |                                 |  |
| 4     | rs2202507  | 1.45E+08 | 5.74E-01       | N/A      | 12    | rs7966207  | 1.01E+08 | 9.55E-01            | GNPTAB    | -             | 5.77E-07 | 5.17E-01 | 9.29E-06 | 8175                            |  |
| 6     | rs1737727  | 35012466 | 6.45E-01       | ANKS1A   | 9     | rs407791   | 32012207 | 1.35E-01            | N/A       | MHC           | 5.77E-07 | 3.35E-02 | 1.29E-02 | 8176                            |  |
| 3     | rs1494837  | 2769237  | 1.75E-01       | N/A      | 8     | rs1866788  | 1.01E+08 | 1.07E-01            | SPAG1     | -             | 5.77E-07 | 1.66E-01 | 2.71E-03 | 8177                            |  |
| 6     | rs1737727  | 35012466 | 6.45E-01       | ANKS1A   | 9     | rs287572   | 31994713 | 1.35E-01            | N/A       | MHC           | 5.77E-07 | 1.71E-01 | 1.19E-03 | 8178                            |  |
| 8     | rs6984093  | 1.25E+08 | 4.00E-01       | FER1L6   | 17    | rs7218965  | 57622877 | 7.10E-01            | N/A       | -             | 5.77E-07 | 1.71E-01 | 1.19E-03 | 8179                            |  |
| 8     | rs2511733  | 1.04E+08 | 9.45E-01       | ODF1     | 18    | rs584970   | 72176763 | 8.92E-01            | N/A       | -             | 5.77E-07 | 1.71E-01 | 1.19E-03 | 8180                            |  |
| 10    | rs7100844  | 1.33E+08 | 9.56E-01       | N/A      | 11    | rs800140   | 2290251  | 6.46E-02            | C11orf21  | -             | 5.77E-07 | 8.88E-01 | 5.56E-05 | 8181                            |  |
| 4     | rs1364886  | 1.42E+08 | 4.87E-01       | RNF150   | 20    | rs2207542  | 59609117 | 8.19E-01            | CDH4      | -             | 5.77E-07 | 9.60E-01 | 3.71E-05 | 8182                            |  |
| 6     | rs1737727  | 35012466 | 6.45E-01       | ANKS1A   | 9     | rs287573   | 31994571 | 1.35E-01            | N/A       | MHC           | 5.77E-07 | N/A      | N/A      | 8183                            |  |
| 6     | rs1737727  | 35012466 | 6.45E-01       | ANKS1A   | 9     | rs453809   | 2006697  | 1.35E-01            | N/A       | MHC           | 5.77E-07 | N/A      | N/A      | 8184                            |  |
| 1     | rs6656611  | 16388392 | 4.78E-01       | ARHGEF19 | 2     | rs17447598 | 3.01E+08 | 6.92E-01            | SPATS2L   | -             | 5.77E-07 | 1.30E-01 | 2.21E-03 | 8185                            |  |
| 7     | rs6969674  | 18929863 | 5.77E-02       | HDAC9    | 10    | rs7070665  | 70919814 | 8.87E-01            | TSPAN15   | -             | 5.77E-07 | 2.54E-01 | 1.48E-03 | 8186                            |  |
| 3     | rs6441301  | 1.61E+08 | 1.14E-01       | N/A      | 8     | rs1425902  | 54281767 | 6.56E-02            | OPRK1     | -             | 5.77E-07 | 3.74E-01 | 2.82E-06 | 8187                            |  |
| 12    | rs1396226  | 73586112 | 5.53E-01       | N/A      | 15    | rs716980   | 37161386 | 6.34E-02            | N/A       | -             | 5.77E-07 | 8.17E-01 | 2.02E-04 | 8188                            |  |
| 1     | rs2276401  | 1.57E+08 | 7.22E-01       | SPTA1    | 21    | rs2833476  | 31969189 | 6.31E-01            | SFRS15    | -             | 5.77E-07 | 4.35E-01 | 1.42E-05 | 8189                            |  |
| 1     | rs6702660  | 4923290  | 9.64E-01       | N/A      | 13    | rs4941866  | 36880118 | 6.94E-01            | N/A       | -             | 5.77E-07 | 5.53E-03 | 3.42E-02 | 8190                            |  |
| 4     | rs10022598 | 1.3E+08  | 5.74E-01       | N/A      | 9     | rs884540   | 8250902  | 2.32E-01            | N/A       | -             | 5.77E-07 | 1.44E-01 | 1.80E-03 | 8191                            |  |
| 9     | rs10819641 | 1.01E+08 | 5.52E-01       | TGFBF1   | 10    | rs2366878  | 1.28E+08 | 7.87E-02            | N/A       | -             | 5.77E-07 | 1.53E-01 | 5.06E-03 | 8192                            |  |
| 1     | rs17371526 | 85299361 | 8.46E-01       | WDR63    | 8     | rs17270765 | 1.25E+08 | 6.56E-01            | FER1L6    | -             | 5.77E-07 | 9.21E-01 | 7.85E-05 | 8193                            |  |
| 7     | rs4719152  | 70669405 | 8.16E-02       | WBSR17   | 9     | rs3789311  | 1.23E+08 | 7.66E-01            | CEP110    | -             | 5.77E-07 | 9.28E-02 | 3.92E-07 | 8194                            |  |
| 16    | rs8060937  | 81277337 | 3.78E-02       | CDH13    | 17    | rs4796274  | 32183977 | 5.59E-01            | N/A       | -             | 5.78E-07 | 2.90E-01 | 6.02E-04 | 8195                            |  |
| 5     | rs889268   | 37917929 | 2.47E-01       | N/A      | 12    | rs2900554  | 11025968 | 4.75E-01            | PRH1      | -             | 5.78E-07 | 6.77E-01 | 2.59E-04 | 8196                            |  |
| 11    | rs2403441  | 19479964 | 3.13E-01       | N/AV2    | 18    | rs12954266 | 18612312 | 2.06E-01            | N/A       | -             | 5.78E-07 | 7.00E-01 | 1.92E-04 | 8197                            |  |
| 1     | rs1031675  | 2.2E+08  | 1.27E-01       | N/A      | 11    | rs7103207  | 3353807  | 5.87E-02            | LOC650368 | -             | 5.78E-07 | 7.31E-01 | 2.42E-04 | 8198                            |  |
| 2     | rs4675141  | 2.28E+08 | 6.97E-01       | N/A      | 8     | rs4243888  | 1.39E+08 | 7.31E-01            | FAM135B   | -             | 5.78E-07 | 1.14E-01 | 5.92E-07 | 8199                            |  |
| 7     | rs3110788  | 1.35E+08 | 9.18E-01       | SCL13A4  | 16    | rs1478705  | 7086270  | 7.88E-01            | A2BP1     | -             | 5.78E-07 | 2.11E-01 | 9.64E-04 | 8200                            |  |
| 2     | rs10174591 | 2.28E+08 | 6.98E-01       | COL4A4   | 8     | rs4243888  | 1.39E+08 | 7.31E-01            | FAM135B   | -             | 5.78E-07 | 1.14E-01 | 5.92E-07 | 8201                            |  |
| 1     | rs4078315  | 2.17E+08 | 1.56E-01       | N/A      | 20    | rs12624811 | 7870861  | 9.87E-01            | HAO1      | -             | 5.78E-07 | 5.47E-01 | 6.08E-04 | 8202                            |  |
| 1     | rs7517054  | 1.96E+08 | 4.15E-01       | NEK7     | 12    | rs7960795  | 1.01E+08 | 1.61E-01            | GNPTAB    | -             | 5.78E-07 | 6.93E-01 | 8.14E-06 | 8203                            |  |
| 9     | rs10511900 | 32285707 | 2.21E-01       | N/A      | 13    | rs9565053  | 73330323 | 7.69E-01            | KLF12     | -             | 5.78E-07 | 7.16E-01 | 2.71E-05 | 8204                            |  |
| 2     | rs1834619  | 17764966 | 5.69E-01       | SMC6     | 8     | rs13254921 | 34760826 | 6.57E-01            | N/A       | -             | 5.78E-07 | 5.09E-02 | 1.31E-02 | 8205                            |  |
| 2     | rs1834619  | 17764966 | 5.69E-01       | SMC6     | 8     | rs2685607  | 34755686 | 6.57E-01            | N/A       | -             | 5.78E-07 | 5.09E-02 | 1.31E-02 | 8206                            |  |
| 14    | rs176338   | 28081367 | 8.18E-01       | N/A      | 15    | rs8043356  | 58803461 | 7.65E-01            | RORA      | -             | 5.78E-07 | 6.69E-01 | 1.16E-03 | 8207                            |  |
| 10    | rs431673   | 90484145 | 5.54E-01       | LIPK     | 21    | rs2834278  | 34141871 | 2.22E-01            | ITSN1     | -             | 5.78E-07 | 2.12E-01 | 7.25E-03 | 8208                            |  |
| 2     | rs2158199  | 1.14E+08 | 4.02E-02       | ANK2     | 13    | rs9318552  | 77923788 | 2.86E-01            | N/A       | -             | 5.78E-07 | 2.96E-01 | 8.86E-04 | 8209                            |  |
| 1     | rs3806365  | 1.61E+08 | 1.45E-01       | RGS5     | 5     | rs7448547  | 1.08E+08 | 7.00E-01            | N/A       | -             | 5.78E-07 | 8.05E-01 | 2.52E-04 | 8210                            |  |
| 1     | rs3806368  | 1.61E+08 | 1.45E-01       | RGS5     | 5     | rs7448547  | 1.08E+08 | 7.00E-01            | N/A       | -             | 5.78E-07 | 8.42E-01 | 2.86E-04 | 8211                            |  |
| 11    | rs11037175 | 42927616 | 1.95E-01       | N/A      | 3     | rs4943461  | 36730514 | 8.97E-01            | N/A       | -             | 5.78E-07 | 4.84E-01 | 2.25E-05 | 8212                            |  |
| 2     | rs2861680  | 79006430 | 1.64E-01       | N/A      | 11    | rs11228715 | 56196812 | 5.52E-01            | OR8U8     | -             | 5.78E-07 | 5.58E-01 | 2.74E-04 | 8213                            |  |
| 10    | rs2457857  | 14100685 | 3.75E-01       | FRMD4A   | 12    | rs2263487  | 45537094 | 2.68E-02            | N/A       | -             | 5.78E-07 | 7.35E-01 | 1.84E-05 | 8214                            |  |
| 8     | rs17755518 | 2583313  | 6.43E-01       | N/A      | 12    | rs2277383  | 50600655 | 3.61E-01            | ACVRL1    | -             | 5.79E-07 | 2.86E-01 | 1.52E-03 | 8215                            |  |
| 1     | rs2282431  | 36557857 | 1.32E-01       | THRAP3   | 7     | rs7799478  | 98519158 | 2.19E-01            | SMURF1    | -             | 5.79E-07 | 5.09E-01 | 4.46E-04 | 8216                            |  |
| 1     | rs7418327  | 86428028 | 6.59E-01       | N/A      | 12    | rs11107871 | 93970892 | 1.50E-01            | NRC2C1    | -             | 5.79E-07 | 2.63E-01 | 7.78E-06 | 8217                            |  |
| 10    | rs10884387 | 1.09E+08 | 4.56E-01       | SORCS1   | 17    | rs998180   | 47751533 | 2.92E-01            | N/A       | -             | 5.79E-07 | 8.29E-01 | 7.56E-05 | 8218                            |  |
| 5     | rs2783487  | 54453150 | 4.94E-01       | CDC20B   | 19    | rs415647   | 3074113  | 9.77E-01            | GNAI5     | -             | 5.79E-07 | 2.21E-01 | 1.27E-03 | 8219                            |  |
| 6     | rs6925151  | 1.5E+08  | 4.69E-01       | RAET1E   | 10    | rs7067847  | 1.23E+08 | 8.36E-01            | N/A       | -             | 5.79E-07 | 2.64E-01 | 1.01E-05 | 8220                            |  |
| 1     | rs1879744  | 2.39E+08 | 6.03E-01       | RGS7     | 8     | rs1022430  | 75373718 | 8.22E-01            | JPH1      | -             | 5.79E-07 | 4.38E-01 | 4.82E-06 | 8221                            |  |
| 6     | rs472072   | 12745272 | 5.47E-01       | N/A      | 12    | rs11060728 | 1.29E+08 | 9.40E-01            | N/A       | -             | 5.79E-07 | 3.35E-01 | 1.31E-05 | 8222                            |  |
| 3     | rs13072528 | 29271196 | 3.61E-01       | N/A      | 4     | rs4689050  | 6814016  | 9.17E-01            | N/A       | -             | 5.79E-07 | 5.05E-01 | 6.47E-06 | 8223                            |  |
| 1     | rs274587   | 74716053 | 5.38E-01       | TNNI3K   | 1     | rs11164301 | 1.02E+08 | 2.21E-01            | N/A       | -             | 5.79E-07 | 8.34E-01 | 2.34E-04 | 8224                            |  |
| 1     | rs274604   | 74729913 | 5.38E-01       | TNNI3K   | 1     | rs11164301 | 1.02E+08 | 2.21E-01            | N/A       | -             | 5.79E-07 | 8.34E-01 | 2.34E-04 | 8225                            |  |
| 6     | rs6926382  | 1.62E+08 | 9.98E-01       | AGPAT4   | 2     | rs2861754  | 67931211 | 5.93E-02            | N/A       | -             | 5.79E-07 | 7.73E-01 | 3.00E-04 | 8226                            |  |
| 4     | rs704352   | 2456284  | 8.39E-01       | N/A      | 16    | rs2920706  | 55015988 | 9.20E-01            | AMFR      | -             | 5.79E-07 | 1.41E-01 | 7.05E-04 | 8227                            |  |
| 3     | rs12493232 | 77495032 | 5.37E-01       | ROBO2    | 11    | rs2239695  | 1.18E+08 | 6.63E-01            | CD3D      | -             | 5.79E-07 | 5.92E-01 | 3.58E-04 | 8228                            |  |
| 1     | rs12036568 | 2.12E+08 | 2.79E-01       | N/A      | 19    | rs10426302 | 59903359 | 1.92E-01            | LILRP2    | -             | 5.79E-07 | 1.56E-01 | 9.93E-04 | 8229                            |  |
| 15    | rs10152229 | 99780180 | 3.42E-01       | PCSK6    | 21    | rs8128155  | 39210983 | 8.62E-01            | N/A       | -             | 5.79E-07 | 8.81E-01 | 2.50E-04 | 8230                            |  |
| 6     | rs7739011  | 3057529  | 1.89E-01       | BPHL     | 5     | rs10514161 | 79222927 | 1.66E-01            | N/A       | -             | 5.80E-07 | 2.93E-01 | 2.75E-04 | 8231                            |  |
| 1     | rs7535209  | 12572663 | 3.54E-01       | DHRS3    | 16    | rs12597345 | 61798718 | 6.13E-01            | N/A       | -             | 5.80E-07 | 6.00E-01 | 6.10E-04 | 8232                            |  |
| 1     | rs7535209  | 12572663 | 3.54E-01       | DHRS3    | 16    | rs12930214 | 61798839 | 6.13E-01            | N/A       | -             | 5.80E-07 | 6.00E-01 | 6.10E-04 | 8233                            |  |
| 4     | rs6554340  | 56822605 | 3.67E-01       | KIAA1211 | 10    | rs11004726 | 56494729 | 2.12E-01            | N/A       | -             | 5.80E-07 | 3.64E-01 | 1.53E-03 | 8234                            |  |
| 10    | rs7074840  | 1.28E+08 | 1.63E-01       | N/A      | 12    | rs12578396 | 42010813 | 5.20E-01            | N/A       | -             | 5.80E-07 | 3.53E-01 | 1.15E-03 | 8235                            |  |
| 3     | rs10933931 | 1.09E+08 | 8.65E-01       | CD47     | 19    | rs501168   | 3697087  | 6.17E-01            | APBA3     | -             | 5.80E-07 | 8.49E-01 | 9.60E-05 | 8236                            |  |
| 1     | rs12037907 | 67745023 | 9.25E-01       | N/A      | 3     | rs6796246  | 29064003 | 4.69E-02            | N/A       | -             | 5.80E-07 | 3.98E-01 | 6.34E-05 | 8237                            |  |
| 5     | rs13178161 | 86987264 | 1.24E-01       | N/A      | 19    | rs12460436 | 22867619 | 1.63E-01            | N/A       | -             | 5.80E-07 | 9.14E-01 | 2.31E-05 | 8238                            |  |
| 5     | rs13178161 | 86987264 | 1.24E-01       | N/A      | 19    | rs7246529  | 22869693 | 1.63E-01            | N/A       | -             | 5.80E-07 | 9.33E-01 | 2.41E-05 | 8239                            |  |
| 5     | rs318108   | 92959503 | 6.47E-01       | FAM172A  | 10    | rs12412647 | 49654308 | 9.16E-01            | WDFY4     | -             | 5.80E-07 | 8.08E-01 | 7.67E-05 | 8240                            |  |
| 1     | rs1736559  | 1.69E+08 | 8.99E-01       | FMO3     | 11    | rs4598653  | 28505842 | 1.13E-01            | N/A       | -             | 5.80E-07 | 5.81E-01 | 2.42E-05 | 8241                            |  |
| 7     | rs2534575  | 38337999 | 4.87E-01       | N/A      | 10    | rs7904918  | 1.14E+08 | 4.04E-02            | ACSL5     | -             | 5.80E-07 | 8.32E-01 | 9.36E-05 | 8242                            |  |
| 13    | rs879681   | 1.06E+08 | 2.38E-01       | N/A      | 19    | rs2304232  | 46454365 | 8.53E-01            | HNRNPUL1  | -             | 5.80E-07 | 3.65E-02 | 1.43E-02 | 8243                            |  |
| 6     | rs12211975 | 37884200 | 9.82E-01       | ZFAND3   | 16    | rs231921   | 20569262 | 1.79E-02            | ACSM1     | -             | 5.80E-07 | 6.96E-01 | 6.49E-05 | 8244                            |  |
| 14    | rs1769621  | 33493429 | 7.51E-02       | EGLN3    | 19    | rs367825   | 3014409  | 2.38E-01            | TLE2      | -             | 5.80E-07 | 7.54E-01 | 7.45E-05 | 8245                            |  |
| 2     | rs1863676  | 2.31E+08 | 9.31E-01       | N/A      | 18    | rs4800466  | 19145025 | 6.12E-01            | C18orf45  |               |          |          |          |                                 |  |

| SNP A |            |          |                |           | SNP B |            |          |                    |           | Interaction P |          |          | Ranking  | Cluster in top 100 interactions |    |
|-------|------------|----------|----------------|-----------|-------|------------|----------|--------------------|-----------|---------------|----------|----------|----------|---------------------------------|----|
| CHR   | SNP        | Location | gle locus P va | Gene      | CHR   | SNP        | Location | single locus P val | Gene      | MHC region    | Stage 1  | Stage 2  | Combined |                                 |    |
| 3     | rs4683070  | 45174624 | 4.12E-01       | CDCP1     | 20    | rs6110252  | 14272140 | 7.09E-02           | MACROD2   | -             | 5.82E-07 | 6.95E-01 | 4.83E-05 | 8287                            |    |
| 1     | rs12031183 | 2.44E+08 | 6.51E-01       | SMYD3     | 9     | rs10733726 | 1.05E+08 | 2.95E-01           | N/A       | -             | 5.83E-07 | 1.54E-01 | 1.28E-06 | 8288                            |    |
| 1     | rs11578784 | 2.22E+08 | 5.54E-02       | N/A       | 10    | rs1409391  | 14667831 | 1.29E-01           | FAM107B   | -             | 5.83E-07 | 2.02E-01 | 1.56E-06 | 8289                            |    |
| 15    | rs753857   | 47645190 | 1.09E-01       | C15orf33  | 16    | rs8057936  | 64472852 | 6.82E-01           | N/A       | -             | 5.83E-07 | 1.19E-01 | 1.73E-06 | 8290                            |    |
| 7     | rs12705744 | 1.1E+08  | 3.82E-01       | IMMP2L    | 8     | rs16879442 | 32444084 | 9.18E-01           | NRG1      | -             | 5.83E-07 | 7.45E-01 | 8.90E-06 | 8291                            |    |
| 4     | rs1379707  | 81399403 | 2.13E-01       | FGF5      | 21    | rs2839378  | 46909417 | 1.50E-01           | PRMT2     | -             | 5.83E-07 | N/A      | N/A      | 8292                            |    |
| 2     | rs10167828 | 1.17E+08 | 5.91E-01       | N/A       | 15    | rs9920389  | 93832564 | 9.64E-01           | LOC145820 | -             | 5.83E-07 | 9.71E-01 | 7.45E-05 | 8293                            |    |
| 7     | rs533887   | 83136139 | 9.16E-02       | SEMA3E    | 15    | rs2073592  | 99689829 | 5.44E-01           | PCSK6     | -             | 5.83E-07 | N/A      | N/A      | 8294                            |    |
| 3     | rs1675521  | 99728322 | 1.05E-01       | CLDND1    | 8     | rs2252460  | 14679062 | 9.27E-01           | SGCZ      | -             | 5.83E-07 | 6.36E-01 | 2.63E-05 | 8295                            |    |
| 5     | rs12518125 | 1.69E+08 | 4.38E-02       | DOCK2     | 11    | rs924110   | 1.33E+08 | 7.03E-01           | N/A       | -             | 5.83E-07 | 7.88E-01 | 1.45E-05 | 8296                            |    |
| 8     | rs12676876 | 69767325 | 1.32E-01       | C8orf34   | 10    | rs1331155  | 1.08E+08 | 7.37E-01           | N/A       | -             | 5.83E-07 | 2.77E-01 | 8.04E-04 | 8297                            |    |
| 1     | rs4540634  | 1.61E+08 | 8.60E-01       | N/A       | 20    | rs6044895  | 17515578 | 1.66E-01           | DSTN      | -             | 5.83E-07 | 2.92E-01 | 4.17E-06 | 8298                            |    |
| 5     | rs10513024 | 53254741 | 1.12E-01       | ARL15     | 20    | rs6139726  | 5351246  | 5.49E-01           | N/A       | -             | 5.83E-07 | N/A      | N/A      | 8299                            |    |
| 2     | rs16855155 | 1.69E+08 | 1.88E-01       | STK39     | 8     | rs4324958  | 1.22E+08 | 7.37E-01           | SNB1      | -             | 5.84E-07 | 5.38E-01 | 1.26E-04 | 8300                            |    |
| 2     | rs12618497 | 12068272 | 2.85E-01       | N/A       | 7     | rs2657237  | 9599702  | 5.15E-01           | N/A       | -             | 5.84E-07 | 8.20E-01 | 4.01E-05 | 8301                            |    |
| 6     | rs270378   | 7707714  | 2.39E-01       | BMP6      | 17    | rs4536508  | 61813793 | 7.85E-02           | PRKCA     | -             | 5.84E-07 | 1.98E-01 | 5.67E-06 | 8302                            |    |
| 6     | rs270378   | 7707714  | 2.39E-01       | BMP6      | 17    | rs7211558  | 61812941 | 7.85E-02           | PRKCA     | -             | 5.84E-07 | 1.98E-01 | 5.67E-06 | 8303                            |    |
| 6     | rs2747690  | 1.64E+08 | 7.58E-01       | PACRG     | 12    | rs10848548 | 1653512  | 6.14E-01           | ADIPOR2   | -             | 5.84E-07 | 5.39E-01 | 1.02E-05 | 8304                            |    |
| 1     | rs1077884  | 1.14E+08 | 1.64E-01       | SYT6      | 10    | rs7923262  | 71895542 | 4.77E-01           | KIAA1274  | -             | 5.84E-07 | 9.51E-01 | 3.05E-05 | 8305                            |    |
| 6     | rs9381237  | 43428388 | 4.32E-01       | ZNF318    | 13    | rs1981060  | 38650044 | 5.89E-01           | N/A       | -             | 5.84E-07 | 1.52E-01 | 2.47E-03 | 8306                            |    |
| 14    | rs1743506  | 95213333 | 4.49E-01       | TCL1B     | 20    | rs292887   | 37761688 | 9.18E-01           | N/A       | -             | 5.84E-07 | 2.72E-01 | 6.08E-04 | 8307                            |    |
| 1     | rs2148210  | 5278276  | 2.74E-01       | N/A       | 4     | rs1353624  | 1.44E+08 | 7.07E-01           | INPP4B    | -             | 5.84E-07 | 7.95E-01 | 9.45E-05 | 8308                            |    |
| 12    | rs12812221 | 55605603 | 5.43E-01       | SDR9C7    | 15    | rs4778154  | 25468103 | 4.83E-02           | GABRG3    | -             | 5.84E-07 | 2.59E-02 | 1.32E-07 | 8309                            |    |
| 7     | rs7806221  | 1.35E+08 | 4.50E-01       | NUP205    | 9     | rs10760025 | 1.21E+08 | 5.52E-02           | DBC1      | -             | 5.84E-07 | 6.01E-01 | 2.09E-05 | 8310                            |    |
| 1     | rs12407446 | 1.57E+08 | 6.61E-01       | CD1A      | 18    | rs3932728  | 388147   | 5.84E-01           | COLEC12   | -             | 5.84E-07 | 7.15E-01 | 1.36E-04 | 8311                            |    |
| 1     | rs3892225  | 2.17E+08 | 2.20E-01       | TGFB2     | 10    | rs7087965  | 16729689 | 1.26E-01           | RSU1      | -             | 5.84E-07 | 7.76E-01 | 8.13E-05 | 8312                            |    |
| 2     | rs10931507 | 1.92E+08 | 7.13E-01       | N/A       | 12    | rs2168029  | 68020908 | 6.01E-01           | LYZ       | -             | 5.84E-07 | 9.73E-02 | 3.21E-03 | 8313                            |    |
| 1     | rs927019   | 63854867 | 2.99E-01       | PGM1      | 4     | rs936551   | 811490   | 8.43E-01           | CPLX1     | -             | 5.84E-07 | 5.61E-01 | 1.62E-04 | 8314                            |    |
| 2     | rs6730381  | 2.22E+08 | 8.96E-02       | N/A       | 3     | rs1263398  | 126789   | 4.20E-01           | N/A       | -             | 5.84E-07 | 2.58E-01 | 1.07E-03 | 8315                            |    |
| 11    | rs1886657  | 34313612 | 9.78E-01       | ABTB2     | 17    | rs11649945 | 3619690  | 2.27E-01           | ITGAE     | -             | 5.84E-07 | 4.08E-01 | 1.66E-03 | 8316                            |    |
| 4     | rs10000121 | 1.58E+08 | 1.69E-01       | N/A       | 5     | rs1370182  | 30748837 | 1.13E-01           | N/A       | -             | 5.84E-07 | 4.44E-01 | 2.98E-04 | 8317                            |    |
| 13    | rs10851266 | 1.11E+08 | 8.98E-01       | N/A       | 21    | rs2835555  | 37273701 | 3.77E-01           | HLCS      | -             | 5.84E-07 | 1.39E-01 | 5.03E-07 | 8318                            |    |
| 13    | rs10851266 | 1.11E+08 | 8.98E-01       | N/A       | 21    | rs2835557  | 37273783 | 3.77E-01           | HLCS      | -             | 5.84E-07 | 1.39E-01 | 5.03E-07 | 8319                            |    |
| 6     | rs12214182 | 23974032 | 9.37E-01       | N/A       | 14    | rs17117185 | 82249803 | 1.90E-01           | N/A       | -             | 5.84E-07 | 4.78E-01 | 2.47E-05 | 8320                            |    |
| 6     | rs12214182 | 23974032 | 9.37E-01       | N/A       | 14    | rs8011971  | 82246445 | 1.90E-01           | N/A       | -             | 5.84E-07 | 4.78E-01 | 2.47E-05 | 8321                            |    |
| 7     | rs11768025 | 1.43E+08 | 6.20E-01       | FAM115A   | 14    | rs2543352  | 75656117 | 1.77E-01           | N/A       | -             | 5.85E-07 | 9.87E-02 | 2.35E-03 | 8322                            |    |
| 3     | rs1877267  | 1.7E+08  | 4.57E-01       | N/A       | 5     | rs759135   | 1.48E+08 | 8.02E-01           | N/A       | -             | 5.85E-07 | 6.69E-01 | 3.50E-05 | 8323                            |    |
| 8     | rs6471711  | 59444379 | 4.28E-01       | N/A       | 19    | rs2116941  | 10195443 | 4.56E-01           | S1PR2     | -             | 5.85E-07 | 9.71E-01 | 3.90E-05 | 8324                            |    |
| 3     | rs2675181  | 9172231  | 4.32E-01       | SRGAP3    | 3     | rs4677766  | 1.96E+08 | 3.65E-01           | N/A       | -             | 5.85E-07 | 2.96E-01 | 2.80E-03 | 8325                            |    |
| 2     | rs666126   | 21135940 | 6.80E-01       | APOB      | 12    | rs1564647  | 1.32E+08 | 9.71E-01           | CHFR      | -             | 5.85E-07 | 8.36E-01 | 1.81E-04 | 8326                            |    |
| 9     | rs10993045 | 95883066 | 1.10E-01       | PTPDC1    | 15    | rs304129   | 99085506 | 5.39E-01           | N/A       | -             | 5.85E-07 | 5.90E-02 | 3.61E-07 | 8327                            |    |
| 2     | rs749460   | 1.35E+08 | 3.65E-01       | TMEM163   | 8     | rs10503296 | 4803438  | 6.89E-01           | CSMD1     | -             | 5.85E-07 | 1.33E-01 | 5.49E-06 | 8328                            |    |
| 14    | rs941924   | 99962502 | 3.27E-01       | WDR25     | 17    | rs2362396  | 75469049 | 5.17E-01           | N/A       | -             | 5.85E-07 | 5.18E-01 | 8.96E-04 | 8329                            |    |
| 12    | rs12372711 | 25418920 | 8.63E-01       | N/A       | 13    | rs2002363  | 1E+08    | 8.78E-01           | N/A       | -             | 5.85E-07 | 2.12E-01 | 4.80E-07 | 8330                            |    |
| 1     | rs10489745 | 1.64E+08 | 6.44E-01       | RXRG      | 18    | rs1443321  | 68035323 | 7.44E-01           | N/A       | -             | 5.85E-07 | 1.17E-01 | 2.52E-03 | 8331                            |    |
| 1     | rs11208905 | 66785643 | 3.50E-01       | SGIP1     | 13    | rs12860685 | 53213806 | 6.53E-01           | N/A       | -             | 5.85E-07 | 1.13E-01 | 2.21E-03 | 8332                            |    |
| 2     | rs1001098  | 2.19E+08 | 7.69E-01       | N/A       | 5     | rs400691   | 1.25E+08 | 9.51E-01           | N/A       | -             | 5.85E-07 | 5.37E-01 | 1.53E-05 | 8333                            |    |
| 13    | rs4770597  | 23605466 | 4.72E-02       | N/A       | 22    | rs16988632 | 19315012 | 1.99E-01           | N/A       | -             | 5.85E-07 | 1.37E-01 | 2.03E-06 | 8334                            |    |
| 13    | rs6561302  | 45664566 | 3.99E-01       | LCP1      | 20    | rs2423487  | 10161095 | 5.14E-01           | SNAP25    | -             | 5.85E-07 | 2.66E-01 | 2.29E-06 | 8335                            |    |
| 2     | rs10170020 | 80373325 | 2.46E-02       | CTNNA2    | 8     | rs2170116  | 16157007 | 3.72E-01           | N/A       | -             | 5.85E-07 | N/A      | N/A      | 8336                            |    |
| 2     | rs12996794 | 2.38E+08 | 2.62E-01       | RAMP1     | 21    | rs2835165  | 36232226 | 3.98E-01           | N/A       | -             | 5.86E-07 | 5.29E-01 | 1.21E-05 | 8337                            |    |
| 3     | rs6783300  | 1.77E+08 | 1.38E-01       | N/AALADL2 | 14    | rs2000316  | 61614119 | 6.46E-01           | SYT16     | -             | 5.86E-07 | N/A      | N/A      | 8338                            |    |
| 8     | rs12547343 | 26889115 | 6.19E-02       | N/A       | 8     | rs16901355 | 1.27E+08 | 9.11E-02           | N/A       | -             | 5.86E-07 | 5.62E-02 | 7.58E-03 | 8339                            |    |
| 8     | rs1481646  | 26887222 | 6.19E-02       | N/A       | 8     | rs16901355 | 1.27E+08 | 9.11E-02           | N/A       | -             | 5.86E-07 | 5.62E-02 | 7.58E-03 | 8340                            |    |
| 2     | rs2595202  | 46045521 | 5.22E-01       | PRKCE     | 3     | rs9654034  | 29318469 | 8.54E-01           | N/A       | -             | 5.86E-07 | 1.04E-01 | 2.99E-06 | 8341                            |    |
| 14    | rs11625068 | 61803905 | 8.47E-01       | N/A       | 18    | rs12454763 | 40688613 | 2.90E-01           | SETBP1    | -             | 5.86E-07 | 2.07E-01 | 1.06E-05 | 8342                            |    |
| 3     | rs6444054  | 1.87E+08 | 5.38E-01       | MAP3K13   | 16    | rs1695608  | 54660259 | 3.62E-01           | N/A       | -             | 5.86E-07 | 7.64E-01 | 4.89E-04 | 8343                            |    |
| 2     | rs6738097  | 1.01E+08 | 9.79E-01       | NPAS2     | 8     | rs6995462  | 3304322  | 6.06E-01           | CSMD1     | -             | 5.86E-07 | 3.28E-01 | 1.35E-05 | 8344                            |    |
| 3     | rs13089230 | 1.79E+08 | 7.71E-01       | N/A       | 10    | rs1152699  | 1.27E+08 | 3.71E-01           | CTBP2     | -             | 5.86E-07 | 6.90E-01 | 6.71E-05 | 8345                            |    |
| 3     | rs4683474  | 1.41E+08 | 8.62E-01       | CLSTN2    | 9     | rs7040955  | 1.04E+08 | 8.57E-01           | N/A       | -             | 5.86E-07 | 4.85E-01 | 5.24E-06 | 8346                            |    |
| 6     | rs6935051  | 1.5E+08  | 5.88E-01       | RAET1L    | 3     | rs1241447  | 1.73E+08 | 6.44E-01           | PLD1      | -             | 5.86E-07 | 7.34E-01 | 6.01E-05 | 8347                            |    |
| 2     | rs1427550  | 19673258 | 3.29E-01       | N/A       | 12    | rs6486795  | 1.21E+08 | 7.72E-01           | ORA1      | -             | 5.86E-07 | 9.49E-01 | 4.89E-05 | 8348                            |    |
| 13    | rs9576292  | 36998697 | 4.66E-01       | N/A       | 14    | rs11627946 | 29657861 | 9.60E-01           | N/A       | -             | 5.86E-07 | N/A      | N/A      | 8349                            |    |
| 8     | rs1489365  | 1.12E+08 | 3.30E-01       | N/A       | 12    | rs11112403 | 1.04E+08 | 4.10E-01           | APPL2     | -             | 5.86E-07 | 4.56E-01 | 3.85E-04 | 8350                            |    |
| 2     | rs831017   | 1.7E+08  | 3.65E-01       | LRP2      | 4     | rs7663866  | 32445371 | 5.98E-01           | N/A       | -             | 5.86E-07 | 8.67E-04 | 1.32E-02 | 8351                            |    |
| 6     | rs1265203  | 4323996  | 4.59E-01       | N/A       | 5     | rs6596651  | 1.05E+08 | 6.06E-02           | N/A       | -             | 5.86E-07 | 8.33E-01 | 8.21E-05 | 8352                            |    |
| 6     | rs7755190  | 44559792 | 9.73E-01       | N/A       | 9     | rs1049158  | 907348   | 6.30E-01           | DMRT1     | -             | 5.86E-07 | 8.96E-01 | 7.06E-05 | 8353                            |    |
| 11    | rs10832519 | 15768506 | 2.92E-01       | N/A       | 15    | rs1000914  | 99768456 | 7.16E-01           | PCSK6     | -             | 5.87E-07 | 2.05E-01 | 1.67E-06 | 8354                            |    |
| 11    | rs10832519 | 15768506 | 2.92E-01       | N/A       | 15    | rs1108993  | 99768718 | 7.16E-01           | PCSK6     | -             | 5.87E-07 | 2.05E-01 | 1.67E-06 | 8355                            |    |
| 11    | rs10832519 | 15768506 | 2.92E-01       | N/A       | 15    | rs1163309  | 99769346 | 7.16E-01           | PCSK6     | -             | 5.87E-07 | 2.05E-01 | 1.67E-06 | 8356                            |    |
| 11    | rs10832519 | 15768506 | 2.92E-01       | N/A       | 15    | rs12916267 | 99770553 | 7.16E-01           | PCSK6     | -             | 5.87E-07 | 2.29E-01 | 2.02E-06 | 8357                            |    |
| 1     | rs766499   | 2.13E+08 | 4.42E-01       | SMYD2     | 13    | rs10492664 | 1.08E+08 | 6.04E-02           | N/A       | -             | 5.87E-07 | 7.98E-01 | 1.49E-05 | 8358                            | </ |

| SNP A |            |          |                           |          | SNP B |            |          |                           |           | MHC region | Interaction P |          |          | Ranking | Cluster in top 100 interactions |
|-------|------------|----------|---------------------------|----------|-------|------------|----------|---------------------------|-----------|------------|---------------|----------|----------|---------|---------------------------------|
| CHR   | SNP        | Location | log <sub>10</sub> p-value | Gene     | CHR   | SNP        | Location | log <sub>10</sub> p-value | Gene      |            | Stage 1       | Stage 2  | Combined |         |                                 |
| 7     | rs10245821 | 89212857 | 1.85E-01                  | N/A      | 12    | rs2900367  | 16028049 | 6.09E-01                  | DERA      | -          | 5.89E-07      | 7.10E-01 | 1.51E-05 | 8399    |                                 |
| 2     | rs11893319 | 1.97E+08 | 1.77E-01                  | HECW2    | 3     | rs9290477  | 1.75E+08 | 6.93E-01                  | NLGN1     | -          | 5.89E-07      | 8.10E-01 | 3.49E-04 | 8400    |                                 |
| 2     | rs13413808 | 2.26E+08 | 4.20E-01                  | N/A      | 4     | rs2159972  | 18666528 | 1.66E-01                  | N/A       | -          | 5.89E-07      | 1.99E-01 | 4.86E-05 | 8401    |                                 |
| 5     | rs17509298 | 1.16E+08 | 6.63E-01                  | N/A      | 22    | rs4824056  | 48314077 | 9.46E-01                  | N/A       | -          | 5.89E-07      | N/A      | N/A      | 8402    |                                 |
| 10    | rs4917420  | 1.06E+08 | 2.66E-01                  | N/A      | 12    | rs4761936  | 50063395 | 2.29E-01                  | GALNT6    | -          | 5.89E-07      | 3.23E-02 | 4.77E-07 | 8403    |                                 |
| 16    | rs2023929  | 70794457 | 3.53E-01                  | N/A      | 18    | rs1843184  | 61704351 | 6.23E-01                  | CDH7      | -          | 5.89E-07      | 4.72E-02 | 7.28E-03 | 8404    |                                 |
| 4     | rs17828324 | 61908200 | 1.90E-01                  | N/A      | 4     | rs3923441  | 88408675 | 2.10E-01                  | N/A       | -          | 5.90E-07      | 2.93E-01 | 9.14E-06 | 8405    |                                 |
| 3     | rs9288967  | 1.14E+08 | 5.45E-01                  | C3orf17  | 11    | rs10902212 | 733813   | 9.12E-02                  | EPS8L2    | -          | 5.90E-07      | 3.92E-01 | 5.59E-06 | 8406    |                                 |
| 6     | rs1135056  | 71018554 | 2.68E-01                  | COL9A1   | 13    | rs9586002  | 1.02E+08 | 7.04E-01                  | LOC121952 | -          | 5.90E-07      | 4.37E-01 | 3.18E-04 | 8407    |                                 |
| 2     | rs1430104  | 1.15E+08 | 2.68E-01                  | DPP10    | 10    | rs10444205 | 6776567  | 2.08E-01                  | N/A       | -          | 5.90E-07      | 5.94E-01 | 6.43E-05 | 8408    |                                 |
| 6     | rs4712728  | 23050192 | 1.83E-02                  | N/A      | 12    | rs10848287 | 1.3E+08  | 9.21E-02                  | GPR133    | -          | 5.90E-07      | 5.07E-01 | 5.86E-03 | 8409    |                                 |
| 4     | rs2135354  | 1.14E+08 | 4.30E-01                  | ANK2     | 19    | rs2965155  | 49880311 | 8.88E-01                  | CEACAM16  | -          | 5.90E-07      | 7.99E-01 | 4.94E-05 | 8410    |                                 |
| 6     | rs7760349  | 57220087 | 9.93E-01                  | N/A      | 8     | rs6991834  | 3115506  | 1.57E-01                  | CSMD1     | -          | 5.90E-07      | 5.86E-01 | 2.85E-05 | 8411    |                                 |
| 6     | rs7760349  | 57220087 | 9.93E-01                  | N/A      | 8     | rs7010127  | 3115425  | 1.57E-01                  | CSMD1     | -          | 5.90E-07      | 5.86E-01 | 2.85E-05 | 8412    |                                 |
| 12    | rs1033232  | 60033642 | 5.14E-01                  | N/A      | 13    | rs1924206  | 21457190 | 4.58E-01                  | N/A       | -          | 5.90E-07      | 3.87E-02 | 1.57E-06 | 8413    |                                 |
| 7     | rs763397   | 10686855 | 8.84E-02                  | N/A      | 18    | rs1376119  | 20536712 | 1.13E-02                  | N/A       | -          | 5.90E-07      | 9.08E-01 | 9.69E-05 | 8414    |                                 |
| 15    | rs999047   | 41476208 | 7.78E-02                  | TP53BP1  | 17    | rs7256487  | 19716654 | 6.42E-02                  | ZNF14     | -          | 5.90E-07      | 9.85E-01 | 1.08E-04 | 8415    |                                 |
| 10    | rs12766316 | 1405366  | 1.71E-01                  | ADARB2   | 19    | rs8078179  | 14856327 | 9.16E-01                  | N/A       | -          | 5.90E-07      | 6.65E-01 | 3.80E-04 | 8416    |                                 |
| 6     | rs2131283  | 50427324 | 9.51E-01                  | N/A      | 12    | rs7304109  | 60484742 | 1.12E-01                  | FAM19A2   | -          | 5.90E-07      | 8.36E-01 | 1.03E-03 | 8417    |                                 |
| 12    | rs7313825  | 12499123 | 1.17E-01                  | LOH12CR1 | 12    | rs1402318  | 76753767 | 8.81E-01                  | N/AV3     | -          | 5.90E-07      | 8.64E-01 | 1.10E-04 | 8418    |                                 |
| 4     | rs7657174  | 82775969 | 1.07E-01                  | N/A      | 11    | rs4586138  | 11955605 | 4.04E-02                  | USP47     | -          | 5.90E-07      | N/A      | N/A      | 8419    |                                 |
| 6     | rs6596805  | 1240151  | 2.83E-01                  | FOXQ1    | 6     | rs1047953  | 22294843 | 4.49E-01                  | FLJ22536  | -          | 5.90E-07      | N/A      | N/A      | 8420    |                                 |
| 10    | rs2163673  | 90477499 | 7.09E-01                  | LIPK     | 21    | rs2837688  | 40829567 | 3.03E-01                  | DSCAM     | -          | 5.90E-07      | 8.65E-02 | 3.83E-07 | 8421    |                                 |
| 2     | rs12052709 | 1.22E+08 | 6.14E-01                  | CLASP1   | 14    | rs2254320  | 91440894 | 1.57E-02                  | FBLN5     | -          | 5.90E-07      | 4.63E-01 | 1.67E-03 | 8422    |                                 |
| 4     | rs12649725 | 63401029 | 5.50E-01                  | N/A      | 12    | rs1436124  | 94807563 | 6.05E-01                  | CCDC38    | -          | 5.90E-07      | 3.97E-02 | 6.95E-07 | 8423    |                                 |
| 6     | rs3130559  | 31205280 | 7.50E-01                  | C6orf15  | 6     | rs2227956  | 31886251 | 5.64E-03                  | VARS      | MHC        | 5.91E-07      | 4.60E-01 | 7.19E-06 | 8424    |                                 |
| 15    | rs723434   | 72130383 | 7.63E-01                  | PML      | 18    | rs7505745  | 4089242  | 8.65E-01                  | N/A       | -          | 5.91E-07      | 1.54E-01 | 5.51E-04 | 8425    |                                 |
| 8     | rs957608   | 14611359 | 8.59E-01                  | SGCZ     | 11    | rs1083345  | 21033719 | 4.49E-01                  | NELL1     | -          | 5.91E-07      | 1.56E-01 | 1.09E-03 | 8426    |                                 |
| 5     | rs12523326 | 1.2E+08  | 2.25E-01                  | N/A      | 11    | rs1982496  | 1.06E+08 | 2.75E-01                  | GUCY1A2   | -          | 5.91E-07      | 9.07E-01 | 7.26E-05 | 8427    |                                 |
| 4     | rs1497125  | 1.47E+08 | 2.07E-01                  | MMAA     | 17    | rs216219   | 2094041  | 6.27E-01                  | SMG6      | -          | 5.91E-07      | 3.16E-01 | 1.95E-03 | 8428    |                                 |
| 1     | rs10915668 | 4873161  | 6.30E-01                  | N/A      | 11    | rs1083581  | 31679060 | 7.96E-01                  | ELP4      | -          | 5.91E-07      | 5.29E-01 | 2.60E-05 | 8429    |                                 |
| 8     | rs7829063  | 1.07E+08 | 3.28E-01                  | N/A      | 9     | rs1096730  | 2630805  | 6.31E-01                  | FLJ35024  | -          | 5.91E-07      | 6.13E-01 | 2.16E-05 | 8430    |                                 |
| 1     | rs1212078  | 1.56E+08 | 4.86E-01                  | N/A      | 18    | rs489631   | 20243022 | 7.04E-01                  | IMPACT    | -          | 5.91E-07      | 5.14E-03 | 1.43E-08 | 8431    |                                 |
| 12    | rs12318001 | 1.03E+08 | 6.33E-01                  | N/A      | 18    | rs786034   | 14930293 | 6.61E-01                  | N/A       | -          | 5.91E-07      | 3.26E-02 | 9.33E-03 | 8432    |                                 |
| 2     | rs1357204  | 53462867 | 1.47E-03                  | N/A      | 8     | rs6991885  | 1.43E+08 | 2.65E-01                  | TSN/ARE1  | -          | 5.91E-07      | 5.22E-01 | 1.02E-05 | 8433    |                                 |
| 5     | rs10515241 | 95988347 | 3.03E-01                  | N/A      | 14    | rs11851301 | 94244019 | 8.05E-01                  | N/A       | -          | 5.91E-07      | 8.19E-01 | 2.90E-04 | 8434    |                                 |
| 1     | rs4847269  | 94189807 | 4.16E-01                  | N/A      | 4     | rs10517861 | 1.67E+08 | 1.90E-01                  | N/A       | -          | 5.91E-07      | 8.49E-01 | 2.49E-04 | 8435    |                                 |
| 5     | rs11953210 | 1.24E+08 | 2.51E-01                  | ZNF608   | 19    | rs7256033  | 54209025 | 1.28E-02                  | SN/AR-G2  | -          | 5.91E-07      | 5.14E-01 | 2.36E-04 | 8436    |                                 |
| 8     | rs895270   | 82067849 | 9.09E-01                  | PAG1     | 10    | rs4747900  | 11374684 | 6.49E-02                  | CUGBP2    | -          | 5.91E-07      | 4.34E-02 | 7.16E-03 | 8437    |                                 |
| 2     | rs20349    | 1.34E+08 | 7.04E-01                  | N/A      | 2     | rs1477500  | 1.81E+08 | 9.98E-01                  | N/A       | -          | 5.91E-07      | 4.18E-01 | 7.79E-06 | 8438    |                                 |
| 6     | rs9464303  | 55886911 | 8.13E-01                  | N/A      | 3     | rs4858348  | 21730685 | 3.92E-01                  | ZNF385D   | -          | 5.92E-07      | 1.51E-01 | 5.80E-06 | 8439    |                                 |
| 6     | rs4574618  | 55924686 | 8.13E-01                  | N/A      | 3     | rs4858348  | 21730685 | 3.92E-01                  | ZNF385D   | -          | 5.92E-07      | 1.69E-01 | 7.06E-06 | 8440    |                                 |
| 6     | rs895641   | 55893820 | 8.13E-01                  | N/A      | 3     | rs4858348  | 21730685 | 3.92E-01                  | ZNF385D   | -          | 5.92E-07      | 1.69E-01 | 7.06E-06 | 8441    |                                 |
| 1     | rs1418784  | 90769062 | 7.66E-01                  | N/A      | 7     | rs1345525  | 1.31E+08 | 4.06E-01                  | N/A       | -          | 5.92E-07      | 2.64E-01 | 8.91E-04 | 8442    |                                 |
| 1     | rs2789405  | 1.86E+08 | 3.34E-01                  | N/A      | 20    | rs8183283  | 50670380 | 3.11E-01                  | N/A       | -          | 5.92E-07      | 2.95E-01 | 3.74E-06 | 8443    |                                 |
| 6     | rs10943465 | 78293015 | 1.26E-01                  | N/A      | 14    | rs1254910  | 61572745 | 1.95E-01                  | SYT16     | -          | 5.92E-07      | 7.31E-01 | 4.33E-04 | 8444    |                                 |
| 6     | rs12204397 | 16601341 | 7.29E-01                  | ATXN1    | 10    | rs10904833 | 16979982 | 6.06E-01                  | CUBN      | -          | 5.92E-07      | 6.04E-01 | 2.95E-05 | 8445    |                                 |
| 6     | rs1408263  | 18515722 | 1.65E-02                  | RNF144B  | 11    | rs616354   | 77265621 | 5.31E-01                  | INTS4     | -          | 5.92E-07      | 3.20E-01 | 3.90E-06 | 8446    |                                 |
| 5     | rs7723716  | 67246186 | 4.70E-01                  | N/A      | 5     | rs34992    | 80302822 | 3.48E-01                  | RASGRF2   | -          | 5.92E-07      | 5.27E-01 | 3.65E-04 | 8447    |                                 |
| 8     | rs1866788  | 1.01E+08 | 1.07E-01                  | SPAG1    | 12    | rs7305093  | 1.3E+08  | 3.09E-01                  | GPR133    | -          | 5.92E-07      | 3.33E-01 | 1.02E-03 | 8448    |                                 |
| 1     | rs2433060  | 2.32E+08 | 5.71E-02                  | N/A      | 4     | rs1656235  | 36970225 | 7.27E-01                  | KIAA1239  | -          | 5.92E-07      | 4.09E-01 | 7.08E-06 | 8449    |                                 |
| 5     | rs10059312 | 66714796 | 1.06E-01                  | N/A      | 18    | rs2847297  | 12787694 | 4.25E-01                  | PTPN2     | -          | 5.92E-07      | 5.58E-01 | 4.67E-04 | 8450    |                                 |
| 2     | rs3769583  | 32821625 | 5.93E-01                  | N/A      | 14    | rs3861621  | 77478622 | 7.86E-02                  | ADCK1     | -          | 5.92E-07      | 1.35E-01 | 6.18E-03 | 8451    |                                 |
| 7     | rs227944   | 23569843 | 9.65E-01                  | N/A      | 20    | rs6070505  | 56560874 | 3.55E-01                  | N/A       | -          | 5.92E-07      | 3.85E-01 | 2.94E-05 | 8452    |                                 |
| 4     | rs6826277  | 78639678 | 6.15E-01                  | CXCL13   | 12    | rs4996094  | 50069928 | 4.23E-01                  | GALNT6    | -          | 5.93E-07      | 8.28E-02 | 8.61E-04 | 8453    |                                 |
| 3     | rs331158   | 78975042 | 5.95E-02                  | ROBO1    | 10    | rs1797     | 1.2E+08  | 9.88E-01                  | N/A       | -          | 5.93E-07      | 4.58E-01 | 2.27E-03 | 8454    |                                 |
| 2     | rs1419950  | 2.3E+08  | 3.09E-01                  | PID1     | 18    | rs2541872  | 61783932 | 3.81E-01                  | N/A       | -          | 5.93E-07      | 8.29E-01 | 1.27E-04 | 8455    |                                 |
| 2     | rs1914791  | 49787517 | 8.33E-01                  | N/A      | 5     | rs338271   | 34839003 | 1.37E-01                  | RAI14     | -          | 5.93E-07      | 7.05E-01 | 6.37E-05 | 8456    |                                 |
| 10    | rs723483   | 1.11E+08 | 6.16E-01                  | N/A      | 20    | rs1883522  | 1074724  | 3.51E-02                  | PSMF1     | -          | 5.93E-07      | 3.29E-01 | 2.13E-05 | 8457    |                                 |
| 11    | rs1793000  | 20663510 | 7.50E-01                  | NELL1    | 12    | rs10879741 | 72903036 | 3.75E-01                  | N/A       | -          | 5.93E-07      | 3.90E-01 | 2.35E-03 | 8458    |                                 |
| 6     | rs1472364  | 38098736 | 6.38E-01                  | ZFAND3   | 18    | rs4075498  | 47826748 | 5.02E-02                  | N/A       | -          | 5.93E-07      | 5.36E-01 | 6.38E-06 | 8459    |                                 |
| 8     | rs2960109  | 1.39E+08 | 5.40E-01                  | N/A      | 14    | rs1087332  | 25202900 | 8.83E-03                  | N/A       | -          | 5.93E-07      | 6.44E-01 | 2.83E-04 | 8460    |                                 |
| 1     | rs6673771  | 1.01E+08 | 4.49E-01                  | S1PR1    | 19    | rs1047333  | 42334005 | 4.22E-02                  | ZNF585A   | -          | 5.93E-07      | 7.46E-01 | 8.47E-06 | 8461    |                                 |
| 3     | rs7611893  | 32295296 | 6.50E-02                  | CM7M8    | 10    | rs10509301 | 69814683 | 1.06E-01                  | RUFY2     | -          | 5.93E-07      | 2.33E-01 | 2.10E-03 | 8462    |                                 |
| 4     | rs1563844  | 60541497 | 6.14E-01                  | N/A      | 5     | rs1019810  | 15651629 | 8.04E-01                  | FBXL7     | -          | 5.93E-07      | 7.43E-01 | 8.65E-06 | 8463    |                                 |
| 8     | rs7007801  | 3303507  | 8.29E-01                  | CSMD1    | 14    | rs4362328  | 68141480 | 3.44E-01                  | RAD51L1   | -          | 5.93E-07      | 8.93E-03 | 1.89E-02 | 8464    |                                 |
| 6     | rs9397523  | 1.53E+08 | 8.99E-02                  | SYNE1    | 10    | rs3922590  | 1.33E+08 | 4.08E-01                  | N/A       | -          | 5.94E-07      | 3.32E-02 | 1.46E-06 | 8465    |                                 |
| 6     | rs742224   | 11878800 | 9.06E-01                  | C6orf105 | 20    | rs6056750  | 9539204  | 5.92E-01                  | PAK7      | -          | 5.94E-07      | 1.55E-01 | 4.53E-03 | 8466    |                                 |
| 10    | rs6482067  | 20175733 | 9.69E-01                  | PLXDC2   | 10    | rs10763792 | 30875579 | 8.56E-01                  | N/A       | -          | 5.94E-07      | 9.24E-02 | 1.14E-06 | 8467    |                                 |
| 1     | rs275137   | 1.66E+08 | 6.89E-01                  | DCAF6    | 9     | rs306538   | 1.35E+08 | 8.88E-01                  | DDX31     | -          | 5.94E-07      | 6.81E-01 | 6.84E-04 | 8468    |                                 |
| 8     | rs6981770  | 17623070 | 7.80E-03                  | MTUS1    | 13    | rs9315678  | 38841803 | 4.74E-01                  | LHFP      | -          | 5.94E-07      | 7.02E-01 | 7.42E-04 | 8469    |                                 |
| 2     | rs7570609  | 1.28E+08 | 8.76E-01                  | MYO7B    | 21    | rs2831689  | 28569675 |                           |           |            |               |          |          |         |                                 |

| SNP A |            |          |                 |             | SNP B |            |          |                    |           | MHC region | Interaction P |          |          | Ranking | Cluster in top 100 interactions |
|-------|------------|----------|-----------------|-------------|-------|------------|----------|--------------------|-----------|------------|---------------|----------|----------|---------|---------------------------------|
| CHR   | SNP        | Location | gle locus P val | Gene        | CHR   | SNP        | Location | single locus P val | Gene      |            | Stage 1       | Stage 2  | Combined |         |                                 |
| 7     | rs17132513 | 2630740  | 8.24E-01        | IQCE        | 10    | rs1907360  | 17145674 | 4.78E-01           | CUBN      | -          | 5.96E-07      | 2.02E-01 | 1.54E-06 | 8511    |                                 |
| 3     | rs7623065  | 22360379 | 1.74E-01        | N/A         | 14    | rs10150688 | 1.06E+08 | 2.72E-01           | N/A       | -          | 5.96E-07      | N/A      | N/A      | 8512    |                                 |
| 4     | rs4698742  | 14085628 | 5.31E-01        | N/A         | 8     | rs2978043  | 1.35E+08 | 7.11E-01           | ST3GAL1   | -          | 5.96E-07      | 7.47E-02 | 5.40E-07 | 8513    |                                 |
| 6     | rs12660608 | 1.23E+08 | 8.18E-02        | CLVS2       | 1     | rs12030667 | 1.5E+08  | 1.59E-01           | N/A       | -          | 5.96E-07      | 1.24E-01 | 1.89E-03 | 8514    |                                 |
| 6     | rs4618489  | 85230221 | 9.25E-01        | N/A         | 4     | rs10016976 | 5979088  | 7.92E-01           | N/A       | -          | 5.96E-07      | 9.56E-01 | 8.30E-05 | 8515    |                                 |
| 6     | rs9362053  | 85234736 | 9.25E-01        | N/A         | 4     | rs10016976 | 5979088  | 7.92E-01           | N/A       | -          | 5.96E-07      | 9.56E-01 | 8.30E-05 | 8516    |                                 |
| 3     | rs2239624  | 1.88E+08 | 2.65E-01        | DGKG        | 7     | rs2299418  | 93870261 | 9.95E-02           | COL1A2    | -          | 5.96E-07      | 4.47E-01 | 6.88E-05 | 8517    |                                 |
| 8     | rs11776172 | 5192944  | 2.49E-01        | N/A         | 12    | rs3825181  | 1.28E+08 | 7.31E-01           | SLC15A4   | -          | 5.96E-07      | 5.90E-01 | 4.77E-04 | 8518    |                                 |
| 2     | rs13025722 | 53525558 | 8.86E-01        | N/A         | 14    | rs2069600  | 95782782 | 1.58E-02           | BDKRB2    | -          | 5.96E-07      | 6.22E-01 | 1.19E-05 | 8519    |                                 |
| 6     | rs2764075  | 7300517  | 1.24E-01        | N/A         | 21    | rs244268   | 23314957 | 1.13E-01           | N/A       | -          | 5.96E-07      | 1.81E-01 | 5.11E-06 | 8520    |                                 |
| 7     | rs4128374  | 70648071 | 1.51E-01        | WBCSR17     | 9     | rs2300932  | 1.23E+08 | 6.11E-01           | C5        | -          | 5.96E-07      | 1.20E-01 | 2.89E-06 | 8521    |                                 |
| 7     | rs1551098  | 33564322 | 9.00E-01        | BBS9        | 21    | rs9636594  | 15050542 | 3.07E-01           | N/A       | -          | 5.96E-07      | 7.26E-01 | 8.79E-06 | 8522    |                                 |
| 10    | rs7894083  | 5933274  | 5.85E-02        | ANKRD16     | 16    | rs4888867  | 77449191 | 1.21E-01           | VWVOX     | -          | 5.96E-07      | 3.86E-02 | 8.84E-07 | 8523    |                                 |
| 5     | rs37545    | 82270553 | 8.00E-01        | N/A         | 14    | rs3751289  | 61053696 | 2.25E-01           | PRKCH     | -          | 5.96E-07      | 8.05E-01 | 1.76E-04 | 8524    |                                 |
| 5     | rs37545    | 82270553 | 8.00E-01        | N/A         | 14    | rs10483736 | 61053005 | 2.25E-01           | PRKCH     | -          | 5.96E-07      | 8.13E-01 | 1.65E-04 | 8525    |                                 |
| 7     | rs10488617 | 37903558 | 1.53E-01        | TXNDC3      | 15    | rs10519836 | 31684497 | 8.50E-01           | RYR3      | -          | 5.96E-07      | 9.29E-01 | 3.76E-04 | 8526    |                                 |
| 1     | rs986034   | 46999414 | 1.14E-01        | N/A         | 8     | rs4620270  | 1.26E+08 | 8.89E-01           | N/A       | -          | 5.96E-07      | 8.39E-01 | 1.63E-03 | 8527    |                                 |
| 1     | rs12568675 | 85697052 | 6.54E-01        | DDAH1       | 12    | rs10507255 | 1.14E+08 | 7.42E-01           | N/A       | -          | 5.97E-07      | 1.64E-01 | 1.84E-05 | 8528    |                                 |
| 4     | rs7687468  | 58807916 | 4.05E-01        | N/A         | 10    | rs12774333 | 77838858 | 3.76E-01           | C10orf11  | -          | 5.97E-07      | 5.95E-01 | 1.74E-05 | 8529    |                                 |
| 4     | rs1480967  | 34845120 | 7.85E-01        | N/A         | 4     | rs1346715  | 1.27E+08 | 8.39E-02           | N/A       | -          | 5.97E-07      | 6.04E-01 | 3.33E-05 | 8530    |                                 |
| 5     | rs736632   | 1.59E+08 | 4.34E-01        | LOC285627   | 7     | rs1005387  | 1.46E+08 | 5.78E-01           | CNTN/AP2  | -          | 5.97E-07      | N/A      | N/A      | 8531    |                                 |
| 7     | rs17621204 | 11322531 | 3.18E-01        | N/A         | 17    | rs1781955  | 51001239 | 1.50E-01           | N/A       | -          | 5.97E-07      | 3.18E-01 | 4.30E-03 | 8532    |                                 |
| 8     | rs2514809  | 95250422 | 7.09E-01        | CDH17       | 17    | rs940009   | 22924910 | 3.78E-01           | KSR1      | -          | 5.97E-07      | 5.45E-01 | 2.66E-05 | 8533    |                                 |
| 10    | rs4750244  | 12713166 | 7.68E-01        | CAMK1D      | 16    | rs1364301  | 81941269 | 1.09E-01           | CDH13     | -          | 5.97E-07      | 5.84E-01 | 6.40E-04 | 8534    |                                 |
| 4     | rs6848941  | 1.02E+08 | 1.83E-01        | N/A         | 17    | rs639679   | 44254253 | 9.84E-01           | CALCOCO2  | -          | 5.97E-07      | 9.19E-01 | 2.01E-04 | 8535    |                                 |
| 3     | rs10935636 | 1.48E+08 | 8.02E-01        | N/A         | 13    | rs1974254  | 1.03E+08 | 1.82E-01           | N/A       | -          | 5.97E-07      | 6.00E-01 | 3.77E-05 | 8536    |                                 |
| 6     | rs9342394  | 65485313 | 1.00E+00        | EYS         | 3     | rs2243131  | 1.61E+08 | 3.19E-01           | IL12A     | -          | 5.97E-07      | 6.18E-01 | 4.76E-05 | 8537    |                                 |
| 10    | rs814628   | 90419632 | 7.73E-01        | LIPF        | 21    | rs2837693  | 40832232 | 1.95E-01           | DSCAM     | -          | 5.97E-07      | 1.88E-01 | 7.76E-04 | 8538    |                                 |
| 12    | rs17097506 | 45709198 | 9.67E-01        | N/A         | 22    | rs2018340  | 41720263 | 8.72E-01           | N/A       | -          | 5.97E-07      | 2.73E-01 | 2.30E-03 | 8539    |                                 |
| 6     | rs7763695  | 34180539 | 6.05E-01        | GRM4        | 2     | rs12616994 | 15291126 | 6.39E-01           | NBAS      | MHC        | 5.97E-07      | 3.83E-01 | 1.50E-03 | 8540    |                                 |
| 1     | rs1506950  | 1.64E+08 | 1.92E-01        | RXRG        | 18    | rs17072163 | 59740628 | 5.87E-01           | SERPINB2  | -          | 5.97E-07      | 8.26E-01 | 1.15E-04 | 8541    |                                 |
| 12    | rs1553380  | 56897140 | 2.79E-01        | N/A         | 21    | rs2257906  | 18085674 | 7.74E-01           | C21orf91  | -          | 5.97E-07      | 1.56E-01 | 4.65E-03 | 8542    |                                 |
| 9     | rs1332349  | 77015553 | 6.51E-02        | N/A         | 21    | rs648648   | 33019856 | 4.18E-01           | SYNJ1     | -          | 5.97E-07      | 1.61E-01 | 2.02E-03 | 8543    |                                 |
| 1     | rs7517475  | 66070749 | 3.91E-01        | PDE4B       | 15    | rs749938   | 89293881 | 4.12E-01           | UNC45A    | -          | 5.97E-07      | 3.29E-01 | 6.69E-04 | 8544    |                                 |
| 7     | rs17735647 | 53031873 | 2.98E-01        | N/A         | 18    | rs2169014  | 8354598  | 2.87E-01           | PTPRM     | -          | 5.97E-07      | 6.43E-01 | 7.23E-04 | 8545    |                                 |
| 4     | rs1353583  | 1.9E+08  | 6.65E-01        | N/A         | 11    | rs1943761  | 1.01E+08 | 4.04E-01           | N/A       | -          | 5.97E-07      | 8.22E-01 | 2.59E-04 | 8546    |                                 |
| 3     | rs1018175  | 43337601 | 2.22E-01        | SNRK        | 17    | rs4078429  | 75949967 | 1.87E-01           | RNF213    | -          | 5.97E-07      | 9.99E-01 | 7.74E-05 | 8547    |                                 |
| 1     | rs761092   | 11600782 | 7.60E-01        | N/A         | 7     | rs10257188 | 92430599 | 9.82E-01           | N/A       | -          | 5.97E-07      | 1.31E-01 | 8.58E-06 | 8548    |                                 |
| 4     | rs767002   | 1.81E+08 | 3.53E-01        | N/A         | 12    | rs3825251  | 1.08E+08 | 6.46E-01           | SVOP      | -          | 5.97E-07      | 6.68E-02 | 5.06E-03 | 8549    |                                 |
| 6     | rs192021   | 3676722  | 3.56E-01        | C6orf145    | 18    | rs1354274  | 73544313 | 6.29E-01           | N/A       | -          | 5.97E-07      | 3.87E-01 | 7.02E-04 | 8550    |                                 |
| 6     | rs192021   | 3676722  | 3.56E-01        | C6orf145    | 18    | rs1995448  | 73552199 | 6.29E-01           | N/A       | -          | 5.97E-07      | 3.87E-01 | 7.02E-04 | 8551    |                                 |
| 5     | rs4700646  | 63990500 | 7.85E-01        | N/A         | 9     | rs2820957  | 7215030  | 9.25E-01           | N/A       | -          | 5.97E-07      | 4.43E-01 | 4.15E-06 | 8552    |                                 |
| 2     | rs10490204 | 1.02E+08 | 9.98E-01        | IL18RAP     | 11    | rs7119726  | 70136496 | 4.88E-02           | SHANK2    | -          | 5.97E-07      | 4.73E-01 | 1.06E-05 | 8553    |                                 |
| 1     | rs2090281  | 1.64E+08 | 3.48E-02        | ALDH9A1     | 8     | rs7820543  | 1.21E+08 | 8.51E-01           | DEPDC6    | -          | 5.97E-07      | 8.74E-01 | 8.86E-05 | 8554    |                                 |
| 15    | rs9920450  | 53480496 | 5.42E-01        | CCPG1       | 20    | rs4401268  | 11893421 | 4.17E-01           | N/A       | -          | 5.97E-07      | 5.31E-01 | 8.17E-04 | 8555    |                                 |
| 8     | rs1480691  | 14808735 | 7.02E-01        | SGCZ        | 22    | rs5762879  | 27616180 | 3.77E-01           | ZNRF3     | -          | 5.97E-07      | 5.34E-01 | 5.16E-04 | 8556    |                                 |
| 6     | rs3798979  | 69738381 | 5.05E-01        | BAI3        | 14    | rs175646   | 74993419 | 5.10E-01           | JD2       | -          | 5.97E-07      | 6.28E-01 | 5.00E-05 | 8557    |                                 |
| 15    | rs6576311  | 22284089 | 7.23E-01        | N/A         | 21    | rs7276462  | 30351507 | 1.67E-01           | N/A       | -          | 5.98E-07      | 5.77E-01 | 2.19E-05 | 8558    |                                 |
| 6     | rs559102   | 53560019 | 6.43E-01        | N/A         | 8     | rs1494754  | 1.16E+08 | 1.09E-01           | N/A       | -          | 5.98E-07      | 9.76E-01 | 1.11E-04 | 8559    |                                 |
| 1     | rs4845391  | 1.53E+08 | 9.66E-01        | KCNM3       | 4     | rs17644011 | 70966894 | 5.35E-01           | CSN1S2A   | -          | 5.98E-07      | 2.24E-01 | 1.12E-05 | 8560    |                                 |
| 2     | rs7597348  | 2.32E+08 | 6.17E-02        | NMUR1       | 15    | rs11635018 | 51846856 | 3.02E-01           | WDR72     | -          | 5.98E-07      | 2.61E-01 | 6.63E-04 | 8561    |                                 |
| 7     | rs17164162 | 11266179 | 6.32E-01        | N/A         | 17    | rs941284   | 52757004 | 1.36E-01           | MSI2      | -          | 5.98E-07      | 4.87E-01 | 5.48E-04 | 8562    |                                 |
| 2     | rs4674952  | 2.26E+08 | 5.40E-01        | DOCK10      | 10    | rs7893153  | 43712417 | 1.24E-02           | N/A       | -          | 5.98E-07      | 6.64E-01 | 1.46E-05 | 8563    |                                 |
| 6     | rs12205120 | 1.55E+08 | 4.76E-01        | IPCEF1      | 10    | rs2069178  | 4118024  | 7.87E-01           | N/A       | -          | 5.98E-07      | 7.12E-01 | 2.81E-04 | 8564    |                                 |
| 8     | rs12544454 | 1.09E+08 | 1.25E-01        | N/A         | 8     | rs10105826 | 1.32E+08 | 8.22E-01           | N/A       | -          | 5.98E-07      | 9.05E-02 | 9.54E-07 | 8565    |                                 |
| 5     | rs10045058 | 1.24E+08 | 6.96E-01        | N/A         | 11    | rs1940640  | 94000460 | 4.42E-01           | PIWIL4    | -          | 5.98E-07      | N/A      | N/A      | 8566    |                                 |
| 1     | rs2772304  | 68409168 | 9.26E-02        | GPR177      | 14    | rs1933553  | 19730945 | 9.93E-01           | OR11G2    | -          | 5.98E-07      | 5.69E-01 | 9.54E-06 | 8567    |                                 |
| 6     | rs4513756  | 91944287 | 9.40E-01        | N/A         | 1     | rs1342780  | 90971264 | 5.87E-01           | BARHL2    | -          | 5.98E-07      | 6.17E-01 | 3.19E-05 | 8568    |                                 |
| 6     | rs3778082  | 1.52E+08 | 1.77E-01        | ESR1        | 3     | rs2568911  | 1.96E+08 | 3.66E-01           | N/A       | -          | 5.98E-07      | N/A      | N/A      | 8569    |                                 |
| 3     | rs9837076  | 1.14E+08 | 1.15E-01        | N/A         | 19    | rs12462301 | 63476544 | 3.48E-01           | ZNF544    | -          | 5.98E-07      | 3.92E-01 | 3.05E-04 | 8570    |                                 |
| 3     | rs4449296  | 77477230 | 9.21E-01        | ROBO2       | 3     | rs3782046  | 1.18E+08 | 4.53E-01           | CD3D      | -          | 5.98E-07      | 7.65E-01 | 2.82E-04 | 8571    |                                 |
| 8     | rs24007741 | 49222882 | 1.34E-01        | N/A         | 15    | rs11638795 | 48203888 | 2.11E-02           | ATPB4     | -          | 5.98E-07      | 7.70E-01 | 3.85E-04 | 8572    |                                 |
| 1     | rs1217057  | 1.56E+08 | 4.85E-01        | KIRREL      | 13    | rs9518810  | 1.02E+08 | 5.48E-01           | TPP2      | -          | 5.98E-07      | 8.01E-01 | 2.08E-04 | 8573    |                                 |
| 5     | rs33376    | 1.71E+08 | 8.11E-01        | N/A         | 8     | rs2948587  | 8493973  | 3.40E-01           | N/A       | -          | 5.98E-07      | 5.92E-01 | 9.58E-06 | 8574    |                                 |
| 9     | rs17778819 | 27289620 | 6.83E-01        | NCRN/A00032 | 11    | rs7928347  | 1.2E+08  | 9.89E-01           | GRIK4     | -          | 5.98E-07      | 6.47E-01 | 3.16E-04 | 8575    |                                 |
| 4     | rs6845251  | 1.84E+08 | 1.20E-01        | VWC2        | 15    | rs2899793  | 73247816 | 3.52E-01           | N/A       | -          | 5.98E-07      | 7.81E-01 | 2.67E-04 | 8576    |                                 |
| 2     | rs4850931  | 1E+08    | 8.67E-01        | CHST10      | 3     | rs6777841  | 1.88E+08 | 1.38E-01           | N/A       | -          | 5.99E-07      | 8.51E-02 | 7.02E-07 | 8577    |                                 |
| 3     | rs2049233  | 1.98E+08 | 6.09E-01        | PAK2        | 4     | rs6419260  | 83823263 | 8.56E-01           | SCD5      | -          | 5.99E-07      | 7.96E-01 | 3.19E-04 | 8578    |                                 |
| 6     | rs1407180  | 1.18E+08 | 4.25E-02        | ROS1        | 9     | rs10820964 | 94081457 | 9.62E-01           | IARS      | -          | 5.99E-07      | N/A      | N/A      | 8579    |                                 |
| 2     | rs12694364 | 2.16E+08 | 5.20E-01        | N/A         | 3     | rs6797616  | 81313323 | 7.54E-02           | N/A       | -          | 5.99E-07      | 7.38E-02 | 6.31E-07 | 8580    |                                 |
| 7     | rs10266901 | 22235570 | 7.72E-01        | RAPGEF5     | 19    | rs3764625  | 54340863 | 3.30E-01           | N/A       | -          | 5.99E-07      | 8.64E-02 | 1.11E-05 | 8581    |                                 |
| 2     | rs984682   | 63199425 | 5.20E-01        | C2orf86     | 20    | rs966534   | 5735785  | 9.38E-02           | C20orf196 | -          | 5.99E-07      | 6.99E-01 |          |         |                                 |

| SNP A |            |          |                |           | SNP B |            |          |                     |           | Interaction P |          |          | Ranking  | Cluster in top 100 interactions |  |
|-------|------------|----------|----------------|-----------|-------|------------|----------|---------------------|-----------|---------------|----------|----------|----------|---------------------------------|--|
| CHR   | SNP        | Location | gle locus P va | Gene      | CHR   | SNP        | Location | single locus P valu | Gene      | MHC region    | Stage 1  | Stage 2  | Combined |                                 |  |
| 1     | rs12119911 | 5616797  | 8.09E-01       | N/A       | 4     | rs10866216 | 1.79E+08 | 5.02E-01            | LOC285501 | -             | 6.01E-07 | 6.79E-01 | 2.32E-03 | 8623                            |  |
| 6     | rs742543   | 3667442  | 1.34E-01       | C6orf145  | 12    | rs7135583  | 1.29E+08 | 8.49E-01            | TMEM132D  | -             | 6.01E-07 | 2.62E-01 | 1.32E-05 | 8624                            |  |
| 5     | rs889268   | 37917929 | 2.47E-01       | N/A       | 12    | rs1077242C | 11065543 | 5.65E-01            | PRH1      | -             | 6.01E-07 | 6.77E-01 | 2.61E-04 | 8625                            |  |
| 5     | rs889268   | 37917929 | 2.47E-01       | N/A       | 12    | rs1551191  | 11220900 | 5.65E-01            | PRH1      | -             | 6.01E-07 | 6.77E-01 | 2.61E-04 | 8626                            |  |
| 5     | rs889268   | 37917929 | 2.47E-01       | N/A       | 12    | rs2010481  | 11071607 | 5.65E-01            | PRH1      | -             | 6.01E-07 | 6.77E-01 | 2.61E-04 | 8627                            |  |
| 5     | rs889268   | 37917929 | 2.47E-01       | N/A       | 12    | rs2600359  | 11175030 | 5.65E-01            | PRH1      | -             | 6.01E-07 | 6.77E-01 | 2.61E-04 | 8628                            |  |
| 5     | rs889268   | 37917929 | 2.47E-01       | N/A       | 12    | rs2708389  | 11096007 | 5.65E-01            | PRH1      | -             | 6.01E-07 | 6.77E-01 | 2.61E-04 | 8629                            |  |
| 5     | rs889268   | 37917929 | 2.47E-01       | N/A       | 12    | rs7486717  | 11204215 | 5.65E-01            | PRH1      | -             | 6.01E-07 | 6.77E-01 | 2.61E-04 | 8630                            |  |
| 1     | rs11121648 | 5846375  | 3.33E-01       | NPHP4     | 12    | rs10848943 | 3814283  | 7.50E-01            | PARP11    | -             | 6.01E-07 | 8.07E-01 | 1.05E-04 | 8631                            |  |
| 5     | rs4704108  | 73428422 | 5.84E-01       | N/A       | 7     | rs42322    | 28657021 | 9.27E-02            | CREB5     | -             | 6.01E-07 | 3.07E-02 | 6.41E-03 | 8632                            |  |
| 4     | rs12509055 | 1.69E+08 | 5.12E-01       | N/A       | 9     | rs7866311  | 1.31E+08 | 3.28E-01            | METTL11A  | -             | 6.01E-07 | 2.42E-01 | 1.58E-03 | 8633                            |  |
| 3     | rs6800560  | 24825476 | 1.33E-02       | N/A       | 4     | rs4269197  | 1.16E+08 | 9.95E-01            | N/A       | -             | 6.01E-07 | 7.34E-01 | 2.54E-05 | 8634                            |  |
| 1     | rs1833036  | 2.15E+08 | 6.81E-01       | ESRRG     | 20    | rs8567     | 61992759 | 2.99E-01            | TPD52L2   | -             | 6.01E-07 | 2.89E-01 | 8.42E-04 | 8635                            |  |
| 1     | rs1001304  | 2.11E+08 | 1.99E-01       | ATF3      | 2     | rs842663   | 74900714 | 2.82E-01            | HK2       | -             | 6.01E-07 | 6.92E-01 | 3.80E-05 | 8636                            |  |
| 3     | rs9422     | 1.25E+08 | 8.04E-01       | MYLK      | 12    | rs10492025 | 1.12E+08 | 1.95E-01            | OAS2      | -             | 6.01E-07 | 8.61E-01 | 2.92E-05 | 8637                            |  |
| 10    | rs1248423  | 29322308 | 7.62E-01       | N/A       | 13    | rs4771419  | 1.02E+08 | 9.85E-01            | FGF14     | -             | 6.01E-07 | 2.58E-01 | 1.21E-05 | 8638                            |  |
| 13    | rs11616409 | 80469691 | 4.13E-01       | N/A       | 14    | rs1953417  | 64948662 | 6.54E-02            | FUT8      | -             | 6.01E-07 | 3.45E-01 | 5.14E-06 | 8639                            |  |
| 4     | rs10035076 | 1.52E+08 | 6.37E-01       | LRBA      | 13    | rs9301361  | 1.09E+08 | 3.45E-01            | MYO16     | -             | 6.01E-07 | 4.30E-01 | 3.20E-05 | 8640                            |  |
| 9     | rs4745511  | 77952115 | 1.71E-01       | N/A       | 11    | rs10897314 | 55378348 | 2.77E-01            | OR5D16    | -             | 6.01E-07 | 4.72E-01 | 6.40E-04 | 8641                            |  |
| 1     | rs514163   | 1.64E+08 | 5.44E-01       | UCK2      | 16    | rs42270    | 12468247 | 6.78E-01            | SNX29     | -             | 6.01E-07 | 6.63E-01 | 1.58E-04 | 8642                            |  |
| 4     | rs1878685  | 1.69E+08 | 6.05E-01       | N/A       | 12    | rs7970396  | 59254503 | 6.20E-01            | N/A       | -             | 6.01E-07 | 7.67E-01 | 5.17E-04 | 8643                            |  |
| 11    | rs1787666  | 65005665 | 3.80E-01       | MALAT1    | 12    | rs7980937  | 77250807 | 9.01E-01            | N/A       | -             | 6.02E-07 | 7.98E-01 | 1.88E-05 | 8644                            |  |
| 3     | rs7623065  | 22360379 | 1.74E-01       | N/A       | 14    | rs10151262 | 1.06E+08 | 7.38E-01            | N/A       | -             | 6.02E-07 | N/A      | N/A      | 8645                            |  |
| 2     | rs10182124 | 1.87E+08 | 7.40E-01       | N/A       | 10    | rs10823403 | 70967730 | 3.46E-01            | N/A       | -             | 6.02E-07 | 2.67E-01 | 1.85E-06 | 8646                            |  |
| 8     | rs10101117 | 29922269 | 8.58E-01       | LOC286135 | 14    | rs1554957  | 77077624 | 2.75E-01            | SPTLC2    | -             | 6.02E-07 | 2.74E-01 | 9.28E-06 | 8647                            |  |
| 2     | rs1106518  | 69181722 | 2.66E-01       | ANTXR1    | 18    | rs2868929  | 10097749 | 2.97E-01            | N/A       | -             | 6.02E-07 | 8.42E-01 | 1.11E-04 | 8648                            |  |
| 2     | rs7582076  | 1.17E+08 | 6.33E-01       | N/A       | 15    | rs9920389  | 93832564 | 9.64E-01            | LOC145820 | -             | 6.02E-07 | 9.04E-01 | 1.50E-04 | 8649                            |  |
| 1     | rs6686875  | 68491604 | 5.52E-01       | N/A       | 12    | rs1986727  | 1.05E+08 | 6.06E-01            | N/A       | -             | 6.02E-07 | 3.92E-01 | 2.87E-06 | 8650                            |  |
| 7     | rs1917361  | 1.24E+08 | 2.36E-01       | N/A       | 11    | rs495330   | 64478484 | 9.67E-01            | C11orf85  | -             | 6.02E-07 | 4.20E-01 | 2.25E-05 | 8651                            |  |
| 6     | rs2764075  | 7300517  | 1.24E-01       | N/A       | 21    | rs198072   | 23344509 | 3.65E-01            | N/A       | -             | 6.02E-07 | 4.69E-01 | 1.85E-05 | 8652                            |  |
| 6     | rs2764075  | 7300517  | 1.24E-01       | N/A       | 21    | rs398570   | 23338997 | 3.65E-01            | N/A       | -             | 6.02E-07 | 4.69E-01 | 1.85E-05 | 8653                            |  |
| 2     | rs11688532 | 1.28E+08 | 1.78E-01       | N/A       | 7     | rs2043221  | 14432417 | 3.54E-01            | DGKB      | -             | 6.02E-07 | 5.71E-01 | 4.98E-04 | 8654                            |  |
| 2     | rs12466450 | 36474457 | 3.37E-01       | CRIM1     | 20    | rs3933284  | 879743   | 7.84E-01            | RSPO4     | -             | 6.02E-07 | 9.55E-01 | 6.52E-04 | 8655                            |  |
| 1     | rs12125484 | 92584784 | 3.43E-01       | RPAP2     | 3     | rs10510803 | 59329572 | 6.53E-02            | N/A       | -             | 6.02E-07 | 3.24E-01 | 1.12E-03 | 8656                            |  |
| 9     | rs1475784  | 1.38E+08 | 8.78E-01       | N/A       | 15    | rs7166977  | 64720857 | 6.18E-01            | N/A       | -             | 6.02E-07 | N/A      | N/A      | 8657                            |  |
| 7     | rs2346444  | 1.33E+08 | 5.91E-01       | EXOC4     | 18    | rs341237   | 6391283  | 7.19E-01            | L3MBTL4   | -             | 6.03E-07 | 7.63E-02 | 4.25E-07 | 8658                            |  |
| 2     | rs12695010 | 2.41E+08 | 4.64E-01       | N/A       | 7     | rs2057761  | 26136637 | 4.47E-01            | N/A       | -             | 6.03E-07 | 5.27E-01 | 2.85E-05 | 8659                            |  |
| 6     | rs2747690  | 1.64E+08 | 7.58E-01       | PACRG     | 12    | rs2286383  | 1761633  | 4.27E-01            | ADIPOR2   | -             | 6.03E-07 | 8.23E-01 | 3.43E-05 | 8660                            |  |
| 4     | rs12505957 | 1.55E+08 | 6.88E-01       | N/A       | 11    | rs648067   | 1.19E+08 | 4.25E-01            | N/A       | -             | 6.03E-07 | 6.68E-01 | 7.26E-06 | 8661                            |  |
| 6     | rs1407180  | 1.18E+08 | 4.25E-02       | ROS1      | 9     | rs10739921 | 94091902 | 9.03E-01            | IARS      | -             | 6.03E-07 | 9.71E-01 | 2.37E-04 | 8662                            |  |
| 4     | rs1407180  | 1.18E+08 | 4.25E-02       | ROS1      | 9     | rs7023004  | 94138533 | 9.03E-01            | CENPP     | -             | 6.03E-07 | 9.71E-01 | 2.37E-04 | 8663                            |  |
| 11    | rs623018   | 1.06E+08 | 8.27E-01       | GUCY1A2   | 20    | rs4811895  | 55639715 | 7.93E-02            | PMCEP1    | -             | 6.03E-07 | 8.20E-02 | 2.78E-03 | 8664                            |  |
| 1     | rs11208758 | 66059788 | 5.82E-01       | PDE4B     | 15    | rs2304939  | 89290806 | 3.80E-01            | UNC45A    | -             | 6.03E-07 | 2.23E-01 | 9.67E-04 | 8665                            |  |
| 1     | rs908319   | 2.33E+08 | 6.89E-01       | N/A       | 12    | rs1468795  | 66536637 | 4.80E-01            | N/A       | -             | 6.03E-07 | 7.75E-01 | 5.43E-04 | 8666                            |  |
| 1     | rs938455   | 2.33E+08 | 6.89E-01       | N/A       | 12    | rs1468795  | 66536637 | 4.80E-01            | N/A       | -             | 6.03E-07 | 8.37E-01 | 4.44E-04 | 8667                            |  |
| 7     | rs10250954 | 22441474 | 5.74E-01       | MGC87042  | 16    | rs4785763  | 88594437 | 5.14E-01            | AFG3L1    | -             | 6.03E-07 | 9.39E-01 | 3.79E-05 | 8668                            |  |
| 9     | rs16915442 | 1E+08    | 9.32E-02       | GABBR2    | 11    | rs1007369  | 1.19E+08 | 9.34E-01            | N/A       | -             | 6.03E-07 | 2.85E-02 | 6.65E-03 | 8669                            |  |
| 2     | rs11692361 | 66577203 | 4.35E-01       | MEIS1     | 19    | rs11882525 | 7561810  | 2.76E-01            | KIAA1543  | -             | 6.03E-07 | 8.19E-02 | 1.47E-02 | 8670                            |  |
| 7     | rs799929   | 79935512 | 5.25E-01       | GN/AT3    | 7     | rs10271646 | 1.24E+08 | 8.14E-01            | POT1      | -             | 6.03E-07 | 1.13E-01 | 6.86E-07 | 8671                            |  |
| 7     | rs799929   | 79935512 | 5.25E-01       | GN/AT3    | 7     | rs727505   | 1.24E+08 | 8.14E-01            | POT1      | -             | 6.03E-07 | 1.13E-01 | 6.86E-07 | 8672                            |  |
| 7     | rs799929   | 79935512 | 5.25E-01       | GN/AT3    | 7     | rs7801661  | 1.24E+08 | 8.14E-01            | POT1      | -             | 6.03E-07 | 1.13E-01 | 6.86E-07 | 8673                            |  |
| 7     | rs799929   | 79935512 | 5.25E-01       | GN/AT3    | 7     | rs1541416  | 1.24E+08 | 8.14E-01            | POT1      | -             | 6.03E-07 | 1.18E-01 | 7.37E-07 | 8674                            |  |
| 7     | rs799929   | 79935512 | 5.25E-01       | GN/AT3    | 7     | rs720614   | 1.24E+08 | 8.14E-01            | POT1      | -             | 6.03E-07 | 1.18E-01 | 7.37E-07 | 8675                            |  |
| 12    | rs12578470 | 1.29E+08 | 4.01E-01       | TMEM132D  | 14    | rs11847316 | 30287393 | 7.26E-01            | SCFD1     | -             | 6.03E-07 | 6.52E-01 | 2.80E-04 | 8676                            |  |
| 7     | rs4947995  | 55276124 | 6.95E-01       | N/A       | 11    | rs10891475 | 1.12E+08 | 1.52E-01            | NCAM1     | -             | 6.03E-07 | 8.79E-01 | 3.22E-04 | 8677                            |  |
| 7     | rs10265924 | 1.56E+08 | 1.67E-01       | LMBR1     | 17    | rs9895907  | 5521311  | 2.74E-01            | N/A       | -             | 6.03E-07 | 9.57E-01 | 7.02E-05 | 8678                            |  |
| 7     | rs10265924 | 1.56E+08 | 1.67E-01       | LMBR1     | 17    | rs9915238  | 5520461  | 3.13E-01            | N/A       | -             | 6.03E-07 | 9.57E-01 | 7.02E-05 | 8679                            |  |
| 15    | rs2631700  | 37767618 | 3.35E-01       | FSIP1     | 21    | rs2298515  | 24980244 | 5.12E-01            | N/A       | -             | 6.03E-07 | 2.19E-01 | 4.37E-07 | 8680                            |  |
| 5     | rs9327697  | 1.34E+08 | 1.15E-01       | PCBD2     | 14    | rs1777685  | 82201687 | 8.47E-01            | N/A       | -             | 6.03E-07 | 3.14E-01 | 1.16E-05 | 8681                            |  |
| 7     | rs10486860 | 96436762 | 3.89E-01       | DLX6AS    | 11    | rs948028   | 1.2E+08  | 5.74E-01            | GRIK4     | -             | 6.03E-07 | 3.73E-01 | 2.15E-05 | 8682                            |  |
| 9     | rs3010716  | 80313592 | 5.32E-01       | N/A       | 15    | rs999787   | 53079743 | 8.58E-01            | N/A       | -             | 6.03E-07 | 7.81E-01 | 7.04E-06 | 8683                            |  |
| 7     | rs17171480 | 35552194 | 6.06E-01       | N/A       | 8     | rs1489587  | 82878407 | 5.97E-01            | SNX16     | -             | 6.03E-07 | 7.32E-01 | 8.24E-05 | 8684                            |  |
| 7     | rs17171480 | 35552194 | 6.06E-01       | N/A       | 8     | rs1470787  | 82903057 | 5.97E-01            | SNX16     | -             | 6.03E-07 | 7.93E-01 | 1.00E-04 | 8685                            |  |
| 7     | rs17171480 | 35552194 | 6.06E-01       | N/A       | 8     | rs774468   | 82885666 | 5.97E-01            | SNX16     | -             | 6.03E-07 | 7.93E-01 | 1.00E-04 | 8686                            |  |
| 11    | rs1446160  | 25045160 | 6.12E-01       | LUZP2     | 13    | rs9599328  | 68151863 | 4.00E-01            | N/A       | -             | 6.04E-07 | 2.29E-02 | 1.03E-07 | 8687                            |  |
| 3     | rs550777   | 55506307 | 2.34E-01       | ERC2      | 3     | rs3968279  | 57162118 | 9.26E-01            | IL17RD    | -             | 6.04E-07 | 4.33E-01 | 9.45E-06 | 8688                            |  |
| 8     | rs7000324  | 91105089 | 4.90E-01       | DEC1R1    | 12    | rs7300317  | 50918840 | 7.41E-01            | LOC283404 | -             | 6.04E-07 | 5.57E-01 | 1.69E-05 | 8689                            |  |
| 8     | rs11985492 | 5863519  | 1.12E-01       | N/A       | 12    | rs11068208 | 1.16E+08 | 3.33E-01            | RNF2      | -             | 6.04E-07 | 5.63E-01 | 3.33E-05 | 8690                            |  |
| 7     | rs4717047  | 1.56E+08 | 3.65E-02       | N/A       | 9     | rs2015843  | 1.28E+08 | 4.25E-01            | N/A       | -             | 6.04E-07 | 2.81E-05 | 2.81E-05 | 8691                            |  |
| 6     | rs7776061  | 2432060  | 7.25E-01       | N/A       | 7     | rs2111815  | 1.32E+08 | 4.69E-01            | CHCHD3    | -             | 6.04E-07 | 6.18E-01 | 2.64E-04 | 8692                            |  |
| 6     | rs2325963  | 2424401  | 7.25E-01       | N/A       | 7     | rs2111815  | 1.32E+08 | 4.69E-01            | CHCHD3    | -             | 6.04E-07 | 6.18E-01 | 2.19E-04 | 8693                            |  |
| 6     | rs12665316 | 1.62E+08 | 7.18E-01       | PARK2     | 3     | rs9830791  | 57066615 | 5.67E-01            | ARHGFE3   | -             |          |          |          |                                 |  |

| SNP A |            |          |                 |          | SNP B |            |          |                    |          | Interaction P |          |          | Ranking  | Cluster in top 100 interactions |  |
|-------|------------|----------|-----------------|----------|-------|------------|----------|--------------------|----------|---------------|----------|----------|----------|---------------------------------|--|
| CHR   | SNP        | Location | gle locus P val | Gene     | CHR   | SNP        | Location | single locus P val | Gene     | MHC region    | Stage 1  | Stage 2  | Combined |                                 |  |
| 2     | rs10495824 | 34604049 | 3.79E-01        | N/A      | 9     | rs10435864 | 1.15E+08 | 5.39E-01           | FKBP15   | -             | 6.07E-07 | 2.70E-02 | 1.08E-07 | 8735                            |  |
| 11    | rs1474500  | 4080688  | 2.64E-01        | STIM1    | 17    | rs7209298  | 28877062 | 6.60E-01           | ACCN1    | -             | 6.07E-07 | 1.94E-01 | 1.02E-03 | 8736                            |  |
| 9     | rs10120316 | 7419449  | 4.50E-01        | N/A      | 19    | rs515391   | 13603702 | 1.61E-01           | N/A      | -             | 6.07E-07 | 9.25E-01 | 4.85E-05 | 8737                            |  |
| 1     | rs502036   | 1.78E+08 | 1.05E-01        | TOR1AIP2 | 8     | rs2269693  | 17237645 | 1.60E-01           | MTMR7    | -             | 6.07E-07 | 1.99E-01 | 1.21E-03 | 8738                            |  |
| 3     | rs3911812  | 1.33E+08 | 6.39E-01        | N/A      | 15    | rs7183261  | 92129998 | 3.06E-01           | N/A      | -             | 6.07E-07 | 2.55E-01 | 3.20E-06 | 8739                            |  |
| 1     | rs11240748 | 2.03E+08 | 7.99E-01        | PIK3C2B  | 3     | rs4973706  | 18896776 | 4.22E-01           | N/A      | -             | 6.07E-07 | 6.77E-01 | 1.91E-04 | 8740                            |  |
| 3     | rs1163740  | 77795273 | 9.82E-01        | ROBO2    | 7     | rs2192073  | 17634341 | 3.98E-01           | N/A      | -             | 6.07E-07 | 8.80E-01 | 1.05E-04 | 8741                            |  |
| 4     | rs4834136  | 1.28E+08 | 3.28E-01        | N/A      | 18    | rs273754   | 21445436 | 5.74E-01           | N/A      | -             | 6.07E-07 | N/A      | N/A      | 8742                            |  |
| 3     | rs7612811  | 21355529 | 3.76E-01        | N/A      | 8     | rs6530778  | 14357664 | 3.34E-01           | SGCZ     | -             | 6.07E-07 | 2.39E-01 | 1.62E-03 | 8743                            |  |
| 6     | rs4594925  | 1.69E+08 | 8.29E-01        | N/A      | 5     | rs1469419  | 65694877 | 3.67E-01           | N/A      | -             | 6.07E-07 | 4.05E-01 | 2.87E-05 | 8744                            |  |
| 1     | rs2594289  | 11536855 | 1.91E-01        | PTCHD2   | 21    | rs1108866  | 18448920 | 2.54E-01           | N/A      | -             | 6.07E-07 | 2.04E-01 | 1.34E-06 | 8745                            |  |
| 3     | rs13068206 | 1.94E+08 | 6.74E-01        | FGF12    | 14    | rs8008701  | 96843914 | 8.87E-01           | N/A      | -             | 6.07E-07 | 6.11E-01 | 5.05E-05 | 8746                            |  |
| 4     | rs2869678  | 88652904 | 7.53E-01        | SPARCL1  | 9     | rs4618799  | 18109661 | 7.02E-01           | N/A      | -             | 6.07E-07 | 3.03E-01 | 2.39E-06 | 8747                            |  |
| 3     | rs1513181  | 1.9E+08  | 7.51E-01        | LPP      | 14    | rs2332909  | 72233067 | 4.87E-01           | DPF3     | -             | 6.07E-07 | 3.65E-01 | 2.35E-03 | 8748                            |  |
| 3     | rs7644727  | 1.45E+08 | 8.34E-01        | SLC9A9   | 8     | rs2816489  | 5849941  | 8.18E-01           | N/A      | -             | 6.07E-07 | 4.12E-01 | 3.33E-03 | 8749                            |  |
| 6     | rs7762377  | 1.33E+08 | 9.42E-01        | TAA1     | 13    | rs7991685  | 50890718 | 4.35E-01           | INTS6    | -             | 6.08E-07 | 4.93E-01 | 1.57E-03 | 8750                            |  |
| 1     | rs10494690 | 1.92E+08 | 7.64E-01        | N/A      | 22    | rs131853   | 46141822 | 2.23E-01           | N/A      | -             | 6.08E-07 | 6.88E-02 | 3.38E-07 | 8751                            |  |
| 1     | rs4657760  | 1.92E+08 | 7.64E-01        | N/A      | 22    | rs131853   | 46141822 | 2.23E-01           | N/A      | -             | 6.08E-07 | 8.39E-02 | 4.31E-07 | 8752                            |  |
| 12    | rs1483757  | 1.16E+08 | 3.69E-01        | NOS1     | 18    | rs12457903 | 12537561 | 3.20E-01           | SPIRE1   | -             | 6.08E-07 | 9.96E-01 | 2.05E-05 | 8753                            |  |
| 3     | rs4680602  | 1.68E+08 | 4.45E-01        | N/A      | 10    | rs6482574  | 27095902 | 7.09E-01           | N/A      | -             | 6.08E-07 | N/A      | N/A      | 8754                            |  |
| 6     | rs9369677  | 47431213 | 7.48E-01        | N/A      | 19    | rs492734   | 53977807 | 8.11E-01           | BCAT2    | -             | 6.08E-07 | 4.91E-01 | 7.68E-04 | 8755                            |  |
| 4     | rs2570096  | 58820719 | 5.52E-01        | N/A      | 9     | rs1927099  | 72025395 | 4.23E-01           | MAMDC2   | -             | 6.08E-07 | 7.83E-01 | 2.15E-05 | 8756                            |  |
| 3     | rs1449996  | 36140983 | 1.58E-01        | N/A      | 10    | rs7897550  | 17104998 | 6.52E-01           | CUBN     | -             | 6.08E-07 | 2.51E-01 | 1.67E-05 | 8757                            |  |
| 3     | rs1992991  | 36123334 | 1.58E-01        | N/A      | 10    | rs7897550  | 17104998 | 6.52E-01           | CUBN     | -             | 6.08E-07 | 2.51E-01 | 1.67E-05 | 8758                            |  |
| 2     | rs6714466  | 2.25E+08 | 5.02E-01        | DOCK10   | 10    | rs7076199  | 43695611 | 3.38E-02           | N/A      | -             | 6.08E-07 | 5.69E-01 | 1.11E-05 | 8759                            |  |
| 2     | rs7558808  | 2.26E+08 | 5.02E-01        | DOCK10   | 10    | rs7076199  | 43695611 | 3.38E-02           | N/A      | -             | 6.08E-07 | 5.69E-01 | 1.11E-05 | 8760                            |  |
| 2     | rs4851111  | 1.06E+08 | 7.20E-01        | C2orf40  | 2     | rs1700611  | 1.22E+08 | 9.88E-01           | N/A      | -             | 6.08E-07 | 1.68E-05 | 1.68E-05 | 8761                            |  |
| 4     | rs4689830  | 7759789  | 2.48E-01        | SORCS2   | 12    | rs10735933 | 64746061 | 7.54E-01           | N/A      | -             | 6.08E-07 | 1.51E-01 | 8.57E-03 | 8762                            |  |
| 10    | rs7083204  | 4504452  | 2.55E-01        | N/A      | 16    | rs4782717  | 81167218 | 7.28E-01           | N/A      | -             | 6.08E-07 | N/A      | N/A      | 8763                            |  |
| 3     | rs1021701  | 25033761 | 9.90E-01        | N/A      | 8     | rs272610   | 81644892 | 1.05E-01           | N/A      | -             | 6.08E-07 | 1.26E-01 | 4.22E-06 | 8764                            |  |
| 6     | rs1331644  | 1.46E+08 | 3.80E-01        | GRM1     | 12    | rs214680   | 45965615 | 9.84E-02           | N/A      | -             | 6.08E-07 | 6.21E-02 | 5.50E-03 | 8765                            |  |
| 3     | rs6788821  | 60099620 | 4.10E-01        | FHIT     | 20    | rs2424244  | 19595527 | 2.18E-01           | SLC24A3  | -             | 6.08E-07 | 9.09E-01 | 2.10E-04 | 8766                            |  |
| 2     | rs7421557  | 1.8E+08  | 6.78E-01        | ZNF385B  | 3     | rs358741   | 1.57E+08 | 8.76E-01           | C3orf33  | -             | 6.08E-07 | 9.89E-01 | 7.47E-04 | 8767                            |  |
| 2     | rs7593072  | 1.41E+08 | 4.00E-01        | LRP1B    | 5     | rs1585224  | 32697244 | 4.34E-01           | N/A      | -             | 6.09E-07 | 2.40E-01 | 3.21E-04 | 8768                            |  |
| 6     | rs1012252  | 18733774 | 7.83E-01        | N/A      | 10    | rs10905067 | 7012015  | 6.11E-01           | N/A      | -             | 6.09E-07 | 8.35E-01 | 1.08E-05 | 8769                            |  |
| 6     | rs7748349  | 18737049 | 7.83E-01        | N/A      | 10    | rs10905067 | 7012015  | 6.11E-01           | N/A      | -             | 6.09E-07 | 8.35E-01 | 1.08E-05 | 8770                            |  |
| 12    | rs2075362  | 95131020 | 1.47E-01        | ELK3     | 22    | rs5997752  | 29468869 | 9.11E-01           | OSBP2    | -             | 6.09E-07 | 1.34E-01 | 6.91E-06 | 8771                            |  |
| 8     | rs1445560  | 82047632 | 5.71E-01        | PAG1     | 21    | rs4816682  | 40723632 | 1.17E-01           | DSGAM    | -             | 6.09E-07 | 3.92E-01 | 4.47E-04 | 8772                            |  |
| 18    | rs7236709  | 43780889 | 9.98E-01        | N/A      | 21    | rs686364   | 30509664 | 7.09E-01           | CLDN8    | -             | 6.09E-07 | 4.47E-01 | 1.09E-04 | 8773                            |  |
| 3     | rs4142860  | 3371403  | 4.00E-01        | N/A      | 11    | rs7937803  | 1.22E+08 | 9.50E-01           | N/A      | -             | 6.09E-07 | 5.66E-01 | 3.41E-05 | 8774                            |  |
| 4     | rs828152   | 16672662 | 9.12E-01        | N/A      | 17    | rs7211818  | 76303498 | 7.82E-01           | RPTOR    | -             | 6.09E-07 | 6.15E-01 | 2.99E-04 | 8775                            |  |
| 2     | rs6714955  | 16564378 | 8.60E-01        | N/A      | 9     | rs970480   | 73460052 | 7.68E-01           | N/A      | -             | 6.09E-07 | 7.88E-01 | 1.45E-04 | 8776                            |  |
| 2     | rs7604116  | 16562832 | 8.60E-01        | N/A      | 9     | rs970480   | 73460052 | 7.68E-01           | N/A      | -             | 6.09E-07 | 7.88E-01 | 1.45E-04 | 8777                            |  |
| 4     | rs12500207 | 1.66E+08 | 6.26E-01        | N/A      | 20    | rs6130274  | 41047898 | 7.73E-02           | PTPRT    | -             | 6.09E-07 | 2.63E-01 | 3.24E-03 | 8778                            |  |
| 2     | rs13410950 | 57506559 | 3.52E-01        | N/A      | 2     | rs4672323  | 59936804 | 2.75E-02           | N/A      | -             | 6.09E-07 | 1.48E-02 | 3.48E-08 | 8779                            |  |
| 2     | rs13410950 | 57506559 | 3.52E-01        | N/A      | 2     | rs2419402  | 59932754 | 2.75E-02           | N/A      | -             | 6.09E-07 | 1.51E-02 | 3.58E-08 | 8780                            |  |
| 4     | rs7691951  | 1.54E+08 | 1.67E-01        | N/A      | 9     | rs566618   | 1.37E+08 | 7.83E-02           | N/A      | -             | 6.09E-07 | 6.44E-01 | 7.24E-04 | 8781                            |  |
| 12    | rs12318001 | 1.03E+08 | 6.33E-01        | N/A      | 18    | rs786038   | 14928839 | 5.50E-01           | N/A      | -             | 6.09E-07 | 3.15E-02 | 9.65E-03 | 8782                            |  |
| 10    | rs10763625 | 19074957 | 8.33E-01        | N/A      | 17    | rs3967769  | 9921751  | 7.44E-01           | GAS7     | -             | 6.09E-07 | 2.70E-02 | 8.95E-08 | 8783                            |  |
| 10    | rs1981251  | 61797933 | 3.88E-01        | ANK3     | 16    | rs7194009  | 19285314 | 7.18E-02           | N/A      | -             | 6.09E-07 | 3.43E-01 | 2.38E-03 | 8784                            |  |
| 6     | rs781736   | 1.25E+08 | 4.59E-01        | N/A      | 4     | rs4235294  | 21830023 | 2.24E-02           | N/A      | -             | 6.09E-07 | 8.01E-01 | 5.54E-05 | 8785                            |  |
| 8     | rs503179   | 96916516 | 9.97E-01        | N/A      | 13    | rs4500590  | 34979108 | 7.80E-01           | NBEA     | -             | 6.10E-07 | 6.51E-03 | 3.66E-08 | 8786                            |  |
| 6     | rs2523864  | 31126525 | 5.29E-01        | HCG22    | 6     | rs9380215  | 31157634 | 4.29E-02           | N/A      | MHC           | 6.10E-07 | 4.21E-01 | 1.08E-04 | 8787                            |  |
| 11    | rs1207273  | 70393663 | 3.47E-01        | SHANK2   | 15    | rs3110075  | 85573499 | 6.60E-01           | N/A      | -             | 6.10E-07 | 4.33E-01 | 3.13E-04 | 8788                            |  |
| 1     | rs7546890  | 1.59E+08 | 8.08E-01        | F11R     | 2     | rs17586405 | 2.32E+08 | 6.61E-01           | N/A      | -             | 6.10E-07 | 6.80E-01 | 1.29E-04 | 8789                            |  |
| 12    | rs9804747  | 57572877 | 2.21E-01        | LRIG3    | 19    | rs12980498 | 23488097 | 8.63E-01           | N/A      | -             | 6.10E-07 | 9.66E-01 | 2.64E-05 | 8790                            |  |
| 4     | rs7682684  | 17849661 | 5.26E-01        | N/A      | 10    | rs11018214 | 1.29E+08 | 4.79E-01           | N/A      | -             | 6.10E-07 | 9.95E-02 | 1.98E-03 | 8791                            |  |
| 2     | rs7569763  | 2778476  | 9.79E-01        | N/A      | 7     | rs42322    | 28657021 | 9.27E-02           | CREB5    | -             | 6.10E-07 | 1.40E-01 | 1.69E-06 | 8792                            |  |
| 6     | rs9479734  | 1.5E+08  | 7.99E-01        | PPP1R14C | 9     | rs1078077  | 88373314 | 7.97E-01           | N/A      | -             | 6.10E-07 | 1.94E-01 | 1.64E-03 | 8793                            |  |
| 5     | rs1030179  | 1.23E+08 | 6.89E-01        | N/A      | 10    | rs4935677  | 58332093 | 2.60E-01           | N/A      | -             | 6.10E-07 | 4.44E-01 | 3.37E-04 | 8794                            |  |
| 7     | rs2373885  | 1.5E+08  | 6.21E-02        | KCNH2    | 8     | rs6981476  | 1.4E+08  | 2.72E-01           | COL22A1  | -             | 6.10E-07 | 8.65E-01 | 8.86E-04 | 8795                            |  |
| 2     | rs7573324  | 1.44E+08 | 5.75E-01        | N/A      | 3     | rs2603133  | 1.1E+08  | 8.72E-02           | MYH15    | -             | 6.10E-07 | 2.68E-01 | 8.57E-06 | 8796                            |  |
| 4     | rs6822279  | 99964728 | 1.96E-01        | N/A      | 11    | rs10892605 | 1.2E+08  | 3.51E-01           | GRIK4    | -             | 6.10E-07 | 4.15E-01 | 1.56E-05 | 8797                            |  |
| 6     | rs4896802  | 1.46E+08 | 5.40E-02        | N/A      | 7     | rs3801407  | 45110028 | 1.45E-01           | NACAD    | -             | 6.10E-07 | 7.43E-01 | 8.55E-05 | 8798                            |  |
| 6     | rs11961178 | 87786587 | 7.88E-01        | HTR1E    | 5     | rs4298224  | 8947289  | 9.93E-01           | N/A      | -             | 6.10E-07 | 6.65E-02 | 5.12E-07 | 8799                            |  |
| 3     | rs4325955  | 30518421 | 4.48E-01        | N/A      | 5     | rs7702304  | 96057851 | 3.78E-01           | CAST     | -             | 6.10E-07 | 5.43E-01 | 1.41E-05 | 8800                            |  |
| 3     | rs12494312 | 1.76E+08 | 4.95E-01        | N/A      | 20    | rs4810496  | 44387690 | 8.39E-01           | N/A      | -             | 6.10E-07 | 6.07E-01 | 4.25E-04 | 8801                            |  |
| 2     | rs12623155 | 1.05E+08 | 1.50E-01        | N/A      | 7     | rs7786445  | 1.55E+08 | 3.07E-01           | N/A      | -             | 6.10E-07 | 7.85E-01 | 3.18E-04 | 8802                            |  |
| 1     | rs12089317 | 22625714 | 4.12E-01        | N/A      | 11    | rs609261   | 1.08E+08 | 7.75E-01           | ATM      | -             | 6.10E-07 | 8.36E-01 | 5.72E-05 | 8803                            |  |
| 16    | rs1684578  | 55627151 | 7.80E-01        | LRRC5    | 17    | rs2042005  | 5674282  | 5.95E-01           | N/A      | -             | 6.11E-07 | 1.49E-01 | 3.26E-06 | 8804                            |  |
| 3     | rs936154   | 36462496 | 5.36E-01        | STAC     | 14    | rs1325541  | 36348098 | 7.13E-01           | SLC25A21 | -             | 6.11E-07 | 7.13E-01 | 8.74E-05 | 8805                            |  |
| 3     | rs936154   | 36462496 | 5.36E-01        | STAC     | 14    | rs1749935  | 36347898 | 7.13E-01           | SLC25A21 | -             | 6.11E-07 | 7.13E-01 | 8.74E-05 | 8806                            |  |
| 2     | rs7609111  | 76828891 |                 |          |       |            |          |                    |          |               |          |          |          |                                 |  |

| SNP A |            |          |                |          | SNP B |            |          |                     |           | MHC region | Interaction P |          |          | Ranking | Cluster in top 100 interactions |
|-------|------------|----------|----------------|----------|-------|------------|----------|---------------------|-----------|------------|---------------|----------|----------|---------|---------------------------------|
| CHR   | SNP        | Location | gle locus P va | Gene     | CHR   | SNP        | Location | single locus P valu | Gene      |            | Stage 1       | Stage 2  | Combined |         |                                 |
| 6     | rs7761723  | 65387111 | 7.96E-01       | EYS      | 6     | rs9403008  | 1.39E+08 | 8.72E-02            | ECT2L     | -          | 6.12E-07      | 2.06E-01 | 2.30E-06 | 8847    |                                 |
| 19    | rs8092     | 3074635  | 4.94E-01       | GN/A15   | 21    | rs715157   | 34869845 | 2.08E-02            | RCAN1     | -          | 6.12E-07      | 5.51E-01 | 4.45E-05 | 8848    |                                 |
| 5     | rs2269954  | 1.38E+08 | 8.02E-01       | BRD8     | 22    | rs137916   | 48833840 | 2.20E-01            | TTL8      | -          | 6.12E-07      | 8.78E-01 | 4.36E-05 | 8849    |                                 |
| 2     | rs2380674  | 15848838 | 9.58E-01       | N/A      | 2     | rs2195477  | 51189362 | 6.45E-01            | N/A       | -          | 6.13E-07      | 3.54E-01 | 1.51E-05 | 8850    |                                 |
| 5     | rs12519172 | 1.61E+08 | 6.94E-01       | N/A      | 13    | rs9565131  | 74540692 | 1.47E-01            | N/A       | -          | 6.13E-07      | 9.37E-01 | 2.57E-04 | 8851    |                                 |
| 11    | rs1790474  | 1.19E+08 | 4.13E-01       | N/A      | 15    | rs3784313  | 69974573 | 6.54E-01            | MYO9A     | -          | 6.13E-07      | 9.70E-01 | 1.78E-04 | 8852    |                                 |
| 6     | rs2395471  | 31348671 | 7.52E-01       | HLA-C    | 6     | rs6929796  | 31630648 | 6.69E-01            | NFKBIL1   | MHC        | 6.13E-07      | 1.95E-01 | 2.35E-06 | 8853    |                                 |
| 3     | rs10510938 | 65241112 | 4.14E-01       | N/A      | 11    | rs12184451 | 91406410 | 4.26E-01            | N/A       | -          | 6.13E-07      | 5.96E-01 | 1.33E-05 | 8854    |                                 |
| 7     | rs6467153  | 1.27E+08 | 1.79E-01       | SND1     | 17    | rs2453589  | 19429443 | 1.12E-01            | SLC47A1   | -          | 6.13E-07      | 4.44E-01 | 7.86E-04 | 8855    |                                 |
| 10    | rs7088704  | 82231910 | 8.87E-01       | TSPAN14  | 13    | rs9531028  | 79665833 | 4.85E-01            | N/A       | -          | 6.13E-07      | 5.40E-01 | 5.08E-03 | 8856    |                                 |
| 14    | rs7149088  | 26690636 | 5.71E-01       | N/A      | 18    | rs8093432  | 622651   | 7.38E-01            | C18orf56  | -          | 6.13E-07      | 6.74E-01 | 3.01E-05 | 8857    |                                 |
| 14    | rs7154679  | 26691701 | 5.71E-01       | N/A      | 18    | rs8093432  | 622651   | 7.38E-01            | C18orf56  | -          | 6.13E-07      | 6.74E-01 | 3.01E-05 | 8858    |                                 |
| 14    | rs7493689  | 26691037 | 5.71E-01       | N/A      | 18    | rs8093432  | 622651   | 7.38E-01            | C18orf56  | -          | 6.13E-07      | 6.74E-01 | 3.01E-05 | 8859    |                                 |
| 2     | rs1370352  | 2.12E+08 | 7.68E-01       | N/A      | 22    | rs139383   | 37857855 | 3.80E-01            | CBX7      | -          | 6.14E-07      | 3.15E-01 | 1.11E-03 | 8860    |                                 |
| 2     | rs4663126  | 2.35E+08 | 4.68E-02       | N/A      | 13    | rs4517635  | 23933155 | 8.30E-01            | PARP4     | -          | 6.14E-07      | 4.91E-01 | 6.66E-05 | 8861    |                                 |
| 3     | rs869557   | 65708881 | 3.29E-01       | MAGH1    | 8     | rs305306   | 1.38E+08 | 4.63E-01            | N/A       | -          | 6.14E-07      | 7.42E-01 | 6.94E-05 | 8862    |                                 |
| 3     | rs2372079  | 30278778 | 1.81E-01       | N/A      | 18    | rs1791303  | 55606206 | 5.86E-01            | N/A       | -          | 6.14E-07      | N/A      | N/A      | 8863    |                                 |
| 1     | rs3806340  | 88921381 | 6.67E-01       | PKN2     | 16    | rs2716563  | 72727157 | 3.95E-02            | N/A       | -          | 6.14E-07      | 2.05E-01 | 4.46E-06 | 8864    |                                 |
| 9     | rs1411936  | 12395940 | 6.76E-01       | N/A      | 10    | rs7916078  | 67519845 | 3.31E-02            | CTNNA3    | -          | 6.14E-07      | 4.66E-01 | 5.47E-06 | 8865    |                                 |
| 2     | rs979976   | 1.37E+08 | 6.60E-01       | THSD7B   | 4     | rs2583636  | 83372203 | 6.35E-01            | N/A       | -          | 6.14E-07      | 5.18E-01 | 1.92E-04 | 8866    |                                 |
| 9     | rs498924   | 1.1E+08  | 1.55E-01       | N/A      | 13    | rs2755223  | 39942303 | 5.21E-01            | LOC646982 | -          | 6.14E-07      | 9.51E-01 | 1.34E-04 | 8867    |                                 |
| 9     | rs10511682 | 20801421 | 7.24E-01       | KIAA1797 | 12    | rs4765110  | 1.26E+08 | 2.97E-01            | N/A       | -          | 6.14E-07      | 8.13E-01 | 6.35E-05 | 8868    |                                 |
| 2     | rs10207095 | 75374192 | 7.98E-01       | N/A      | 10    | rs953920   | 1.18E+08 | 1.93E-01            | GFRA1     | -          | 6.14E-07      | 9.16E-01 | 2.51E-04 | 8869    |                                 |
| 2     | rs2593713  | 1.44E+08 | 7.82E-01       | N/A      | 3     | rs1306978  | 1.1E+08  | 6.12E-02            | KIAA1524  | -          | 6.14E-07      | 1.61E-01 | 5.98E-06 | 8870    |                                 |
| 1     | rs1546204  | 73981721 | 9.62E-01       | N/A      | 10    | rs7906694  | 1.2E+08  | 5.23E-01            | CASC2     | -          | 6.14E-07      | 9.39E-01 | 6.52E-04 | 8871    |                                 |
| 1     | rs2634999  | 1.63E+08 | 5.26E-01       | N/A      | 3     | rs7618962  | 1.83E+08 | 5.30E-01            | N/A       | -          | 6.14E-07      | 8.51E-02 | 5.87E-07 | 8872    |                                 |
| 4     | rs13102102 | 81292696 | 8.28E-02       | N/A      | 20    | rs6090443  | 61624230 | 7.46E-01            | PPDPF     | -          | 6.14E-07      | 5.04E-01 | 4.02E-04 | 8873    |                                 |
| 9     | rs1505641  | 80384461 | 5.83E-01       | N/A      | 19    | rs1382357  | 42669449 | 6.60E-01            | ZNF569    | -          | 6.14E-07      | 6.33E-01 | 1.76E-04 | 8874    |                                 |
| 13    | rs1329292  | 43164920 | 6.44E-01       | ENOX1    | 13    | rs9595049  | 43491911 | 2.85E-01            | LOC121838 | -          | 6.14E-07      | 3.16E-02 | 2.52E-07 | 8875    |                                 |
| 8     | rs3940483  | 62165144 | 6.29E-01       | N/A      | 12    | rs11045776 | 21169459 | 1.32E-01            | SLC01B1   | -          | 6.15E-07      | 6.44E-01 | 9.11E-05 | 8876    |                                 |
| 3     | rs7615155  | 1.21E+08 | 8.53E-01       | CD80     | 18    | rs339866   | 20462599 | 6.44E-03            | N/A       | -          | 6.15E-07      | 8.09E-01 | 2.58E-05 | 8877    |                                 |
| 15    | rs4485306  | 91483233 | 6.19E-01       | N/A      | 18    | rs11875334 | 14255834 | 5.16E-01            | N/A       | -          | 6.15E-07      | 2.55E-01 | 9.38E-04 | 8878    |                                 |
| 3     | rs9848505  | 1.73E+08 | 6.80E-01       | PLD1     | 13    | rs1230455  | 45702138 | 5.90E-01            | N/A       | -          | 6.15E-07      | 4.09E-01 | 2.95E-06 | 8879    |                                 |
| 3     | rs11718502 | 42504086 | 3.62E-01       | VIPR1    | 20    | rs11697918 | 843325   | 6.83E-01            | ANGPT4    | -          | 6.15E-07      | 4.25E-01 | 1.04E-05 | 8880    |                                 |
| 1     | rs6583069  | 1.09E+08 | 4.81E-01       | SLC25A24 | 2     | rs6719434  | 12780356 | 4.32E-02            | TRIB2     | -          | 6.15E-07      | 4.54E-01 | 9.00E-04 | 8881    |                                 |
| 14    | rs7154905  | 66709646 | 1.54E-02       | GLPHN    | 16    | rs12449282 | 10265020 | 5.28E-01            | N/A       | -          | 6.15E-07      | 8.61E-01 | 1.11E-04 | 8882    |                                 |
| 7     | rs4717112  | 72903353 | 4.94E-01       | WBSR27   | 16    | rs1094928  | 64511973 | 2.29E-01            | N/A       | -          | 6.15E-07      | 1.19E-02 | 6.04E-08 | 8883    |                                 |
| 3     | rs2133600  | 1.79E+08 | 9.80E-01       | N/A      | 5     | rs7724797  | 31131278 | 5.83E-01            | N/A       | -          | 6.15E-07      | 2.13E-01 | 1.50E-06 | 8884    |                                 |
| 5     | rs716866   | 1.69E+08 | 1.09E-01       | SLIT3    | 9     | rs1663762  | 74466718 | 1.36E-01            | TMC1      | -          | 6.15E-07      | 5.48E-01 | 1.57E-04 | 8885    |                                 |
| 16    | rs7192957  | 59563069 | 5.24E-01       | N/A      | 17    | rs886078   | 47090559 | 7.36E-01            | CA10      | -          | 6.15E-07      | 2.55E-01 | 1.69E-03 | 8886    |                                 |
| 1     | rs3000802  | 2.26E+08 | 2.15E-01       | N/A      | 2     | rs7575156  | 1.81E+08 | 3.32E-01            | N/A       | -          | 6.15E-07      | 5.03E-01 | 1.95E-04 | 8887    |                                 |
| 12    | rs11108568 | 95448949 | 5.87E-01       | N/A      | 15    | rs8036295  | 51651969 | 2.81E-01            | WDR72     | -          | 6.15E-07      | 5.60E-01 | 1.09E-04 | 8888    |                                 |
| 9     | rs10858377 | 1.37E+08 | 5.00E-01       | N/A      | 18    | rs8088785  | 43806288 | 1.38E-01            | ZBTB7C    | -          | 6.15E-07      | N/A      | N/A      | 8889    |                                 |
| 2     | rs1023632  | 1.5E+08  | 2.92E-02       | LYPD6B   | 14    | rs1275689  | 68882032 | 3.17E-01            | GALNTL1   | -          | 6.16E-07      | 9.48E-02 | 8.78E-07 | 8890    |                                 |
| 6     | rs13201016 | 1.57E+08 | 1.55E-01       | N/A      | 19    | rs3786657  | 14367632 | 5.50E-01            | DDX39     | -          | 6.16E-07      | 5.27E-01 | 5.97E-06 | 8891    |                                 |
| 4     | rs7679904  | 98410731 | 4.75E-01       | N/A      | 10    | rs11593108 | 1.01E+08 | 6.50E-02            | N/A       | -          | 6.16E-07      | 3.14E-01 | 4.98E-06 | 8892    |                                 |
| 1     | rs12030578 | 21921251 | 5.63E-01       | USP48    | 4     | rs4435811  | 1.18E+08 | 2.88E-01            | N/A       | -          | 6.16E-07      | 5.92E-01 | 3.49E-05 | 8893    |                                 |
| 3     | rs7651713  | 1.13E+08 | 9.45E-01       | N/A      | 7     | rs6960287  | 30823866 | 1.55E-01            | FAM188B   | -          | 6.16E-07      | 8.72E-01 | 1.92E-04 | 8894    |                                 |
| 2     | rs2347857  | 19781723 | 8.76E-01       | N/A      | 4     | rs4690032  | 2693329  | 2.15E-01            | TNIP2     | -          | 6.16E-07      | 3.45E-01 | 1.76E-05 | 8895    |                                 |
| 1     | rs274587   | 74716053 | 5.38E-01       | TNNI3K   | 1     | rs10493976 | 1.02E+08 | 5.05E-01            | OLFM3     | -          | 6.16E-07      | 8.33E-01 | 9.25E-05 | 8896    |                                 |
| 1     | rs274604   | 74729913 | 5.38E-01       | TNNI3K   | 1     | rs10493976 | 1.02E+08 | 5.05E-01            | OLFM3     | -          | 6.16E-07      | 8.33E-01 | 9.25E-05 | 8897    |                                 |
| 5     | rs108609   | 56937664 | 7.86E-01       | N/A      | 14    | rs7148001  | 48189937 | 8.57E-01            | N/A       | -          | 6.16E-07      | 2.17E-01 | 7.86E-04 | 8898    |                                 |
| 5     | rs108609   | 56937664 | 7.86E-01       | N/A      | 14    | rs5004293  | 48191689 | 8.57E-01            | N/A       | -          | 6.16E-07      | 2.60E-01 | 6.27E-04 | 8899    |                                 |
| 4     | rs4546314  | 1.19E+08 | 7.45E-01       | N/A      | 5     | rs2114961  | 1.35E+08 | 3.60E-01            | N/A       | -          | 6.16E-07      | N/A      | N/A      | 8900    |                                 |
| 3     | rs16943    | 51849719 | 7.98E-01       | IQCF3    | 9     | rs12236822 | 29968410 | 6.11E-01            | N/A       | -          | 6.16E-07      | 6.07E-01 | 1.65E-05 | 8901    |                                 |
| 1     | rs631272   | 12129342 | 4.26E-01       | TNFRSF8  | 14    | rs8007372  | 87698870 | 7.32E-01            | KCNK10    | -          | 6.16E-07      | 8.74E-01 | 1.45E-04 | 8902    |                                 |
| 4     | rs921853   | 34661236 | 9.09E-01       | N/A      | 11    | rs3740958  | 36429376 | 2.52E-02            | PRR5L     | -          | 6.16E-07      | 8.55E-01 | 7.65E-05 | 8903    |                                 |
| 16    | rs7500355  | 84634601 | 7.85E-01       | N/A      | 17    | rs4889744  | 22640100 | 9.66E-01            | N/A       | -          | 6.16E-07      | 2.76E-01 | 1.13E-03 | 8904    |                                 |
| 4     | rs12642398 | 89542237 | 4.46E-01       | HERC6    | 10    | rs3121480  | 1.15E+08 | 5.66E-02            | NRAP      | -          | 6.16E-07      | 9.58E-01 | 6.04E-05 | 8905    |                                 |
| 4     | rs6837103  | 52410697 | 9.66E-01       | DCUN1D4  | 5     | rs216148   | 1.49E+08 | 2.51E-01            | HMGXB3    | -          | 6.17E-07      | 5.75E-01 | 5.95E-04 | 8906    |                                 |
| 3     | rs3009500  | 1.33E+08 | 2.42E-01       | N/A      | 10    | rs1953734  | 1.13E+08 | 4.20E-02            | N/A       | -          | 6.17E-07      | 8.45E-01 | 1.30E-04 | 8907    |                                 |
| 5     | rs6556665  | 1.65E+08 | 8.43E-01       | N/A      | 22    | rs2587113  | 16708503 | 1.18E-01            | MICAL3    | -          | 6.17E-07      | N/A      | N/A      | 8908    |                                 |
| 3     | rs9839376  | 1.8E+08  | 1.78E-01       | KCNMB2   | 5     | rs13362504 | 56014886 | 9.88E-01            | N/A       | -          | 6.17E-07      | 4.48E-01 | 3.26E-05 | 8909    |                                 |
| 5     | rs4835860  | 1.22E+08 | 2.56E-01       | N/A      | 12    | rs1158818  | 66463164 | 5.69E-01            | N/A       | -          | 6.17E-07      | 5.05E-01 | 2.56E-04 | 8910    |                                 |
| 1     | rs1146394  | 85719788 | 4.53E-01       | DDAH1    | 18    | rs555107   | 7455949  | 2.61E-01            | N/A       | -          | 6.17E-07      | 8.21E-01 | 3.15E-04 | 8911    |                                 |
| 11    | rs1894213  | 74837056 | 6.08E-02       | GDPD5    | 16    | rs7191962  | 79763243 | 7.80E-01            | PKD1L2    | -          | 6.17E-07      | 8.71E-01 | 5.01E-04 | 8912    |                                 |
| 11    | rs482458   | 74836097 | 6.08E-02       | GDPD5    | 16    | rs7191962  | 79763243 | 7.80E-01            | PKD1L2    | -          | 6.17E-07      | 8.71E-01 | 5.01E-04 | 8913    |                                 |
| 11    | rs482503   | 74836081 | 6.08E-02       | GDPD5    | 16    | rs7191962  | 79763243 | 7.80E-01            | PKD1L2    | -          | 6.17E-07      | 8.71E-01 | 5.01E-04 | 8914    |                                 |
| 14    | rs7160556  | 27866669 | 3.39E-01       | N/A      | 14    | rs17128731 | 92541968 | 6.03E-02            | ITPK1     | -          | 6.17E-07      | 2.44E-01 | 2.19E-03 | 8915    |                                 |
| 6     | rs488367   | 1.25E+08 | 8.36E-01       | NKA1N2   | 16    | rs12927295 | 5186015  | 1.66E-01            | N/A       | -          | 6.17E-07      | 5.29E-01 | 1.62E-05 | 8916    |                                 |
| 6     | rs6935051  | 1.5E+08  | 5.88E-01       | RAET1L   | 3     | rs9290426  | 1.73E+08 | 7.40E-01            | PLD1      | -          | 6.17E-07      | 7.14E-01 | 5.76E-05 | 8917    |                                 |
| 6     | rs942492   | 7335966  | 1.16E-01       | N/A      | 2     | rs12691624 | 1.42E+08 | 3.61E-01            | LRP1B     | -          | 6.17E-07      |          |          |         |                                 |

| SNP A |            |          |                 |           | SNP B |            |          |                      |             | Interaction P |          |          | Ranking  | Cluster in top 100 interactions |  |
|-------|------------|----------|-----------------|-----------|-------|------------|----------|----------------------|-------------|---------------|----------|----------|----------|---------------------------------|--|
| CHR   | SNP        | Location | gle locus P val | Gene      | CHR   | SNP        | Location | Single locus P value | Gene        | MHC region    | Stage 1  | Stage 2  | Combined |                                 |  |
| 10    | rs10903731 | 2318519  | 2.42E-01        | N/A       | 14    | rs4906459  | 1.04E+08 | 8.88E-01             | N/A         | -             | 6.20E-07 | 3.58E-01 | 1.47E-05 | 8959                            |  |
| 2     | rs17734815 | 30175483 | 8.49E-01        | N/A       | 9     | rs1555422  | 17611965 | 4.27E-01             | SH3GL2      | -             | 6.20E-07 | 4.42E-01 | 7.34E-06 | 8960                            |  |
| 1     | rs7545391  | 61850935 | 6.14E-01        | N/A       | 10    | rs3740415  | 1.04E+08 | 7.13E-01             | TMEM180     | -             | 6.20E-07 | 6.91E-01 | 4.94E-04 | 8961                            |  |
| 1     | rs7545391  | 61850935 | 6.14E-01        | N/A       | 10    | rs7342070  | 1.04E+08 | 7.13E-01             | C10orf95    | -             | 6.20E-07 | 8.56E-01 | 3.30E-04 | 8962                            |  |
| 4     | rs2611021  | 1.81E+08 | 5.29E-02        | N/A       | 16    | rs1566045  | 49579304 | 4.21E-01             | N/A         | -             | 6.20E-07 | 1.07E-01 | 9.26E-03 | 8963                            |  |
| 6     | rs2328779  | 23668885 | 6.45E-01        | N/A       | 6     | rs12202603 | 36351472 | 7.94E-01             | PNPLA1      | MHC           | 6.20E-07 | 8.33E-01 | 3.90E-05 | 8964                            |  |
| 10    | rs17110864 | 89364066 | 8.95E-01        | N/A       | 16    | rs11648776 | 82122361 | 5.90E-02             | CDH13       | -             | 6.20E-07 | 7.28E-01 | 4.81E-05 | 8965                            |  |
| 3     | rs7610039  | 24332086 | 4.49E-01        | THRB      | 11    | rs10488764 | 1.1E+08  | 3.21E-01             | FDX1        | -             | 6.20E-07 | 1.40E-01 | 5.90E-03 | 8966                            |  |
| 2     | rs601400   | 1.66E+08 | 5.54E-01        | N/A       | 10    | rs2490846  | 37140774 | 7.05E-02             | N/A         | -             | 6.20E-07 | 3.87E-01 | 6.76E-06 | 8967                            |  |
| 6     | rs3818408  | 10496639 | 7.25E-01        | TFAP2A    | 2     | rs1865373  | 2.32E+08 | 4.54E-02             | C2orf57     | -             | 6.20E-07 | 4.34E-01 | 1.75E-05 | 8968                            |  |
| 8     | rs10088527 | 1.13E+08 | 1.46E-01        | N/A       | 20    | rs16995121 | 8632506  | 5.45E-01             | PLCB1       | -             | 6.20E-07 | 5.64E-01 | 1.63E-05 | 8969                            |  |
| 11    | rs10750352 | 1.26E+08 | 6.61E-01        | KIRREL3   | 12    | rs2284422  | 13855111 | 3.90E-02             | GRIN2B      | -             | 6.20E-07 | 6.06E-01 | 9.35E-04 | 8970                            |  |
| 6     | rs9461680  | 31351326 | 4.16E-01        | HLA-C     | 13    | rs4479095  | 98070051 | 6.42E-01             | N/A         | MHC           | 6.20E-07 | 6.41E-01 | 1.15E-04 | 8971                            |  |
| 4     | rs4864014  | 1.32E+08 | 1.40E-01        | N/A       | 11    | rs1349784  | 99311421 | 2.15E-01             | CNTN5       | -             | 6.21E-07 | 8.06E-01 | 3.38E-05 | 8972                            |  |
| 4     | rs1048447  | 68166067 | 3.20E-01        | UBA6      | 12    | rs4768582  | 43675084 | 4.51E-01             | DBX2        | -             | 6.21E-07 | 9.51E-01 | 8.13E-05 | 8973                            |  |
| 1     | rs1843593  | 68281593 | 3.20E-01        | LOC550112 | 12    | rs4768582  | 43675084 | 4.51E-01             | DBX2        | -             | 6.21E-07 | 9.51E-01 | 8.13E-05 | 8974                            |  |
| 1     | rs4927071  | 54452500 | 3.24E-01        | SSBP3     | 18    | rs12607576 | 13236168 | 9.33E-01             | C18orf1     | -             | 6.21E-07 | 6.14E-01 | 3.34E-05 | 8975                            |  |
| 6     | rs7752992  | 20533437 | 9.32E-01        | E2F3      | 2     | rs1446738  | 1.34E+08 | 4.91E-01             | N/A         | -             | 6.21E-07 | 9.74E-01 | 6.30E-05 | 8976                            |  |
| 13    | rs9603180  | 36895401 | 8.29E-01        | N/A       | 17    | rs1388164  | 29068522 | 6.13E-01             | ACCN1       | -             | 6.21E-07 | 8.84E-01 | 5.67E-04 | 8977                            |  |
| 1     | rs11118465 | 2.18E+08 | 1.42E-01        | SLC30A10  | 10    | rs2893959  | 66053372 | 8.59E-01             | N/A         | -             | 6.21E-07 | 7.77E-01 | 1.22E-04 | 8978                            |  |
| 4     | rs10001661 | 89468396 | 5.50E-01        | N/A       | 20    | rs2424253  | 19921873 | 4.76E-02             | RIN2        | -             | 6.21E-07 | 3.61E-01 | 8.60E-04 | 8979                            |  |
| 13    | rs9742122  | 84196912 | 2.70E-01        | N/A       | 16    | rs1694254  | 85617984 | 2.75E-01             | N/A         | -             | 6.21E-07 | 1.11E-01 | 3.02E-03 | 8980                            |  |
| 4     | rs2197670  | 5270240  | 7.69E-01        | STK32B    | 4     | rs4695338  | 47843579 | 9.82E-01             | TEC         | -             | 6.21E-07 | 3.64E-01 | 7.40E-04 | 8981                            |  |
| 6     | rs4280956  | 23064231 | 5.80E-02        | N/A       | 12    | rs10848287 | 1.3E+08  | 9.21E-01             | GPR133      | -             | 6.21E-07 | 5.02E-01 | 5.00E-03 | 8982                            |  |
| 3     | rs13067383 | 61332457 | 7.04E-01        | N/A       | 17    | rs11656545 | 69040691 | 4.86E-01             | SDK2        | -             | 6.21E-07 | 6.89E-01 | 2.39E-04 | 8983                            |  |
| 1     | rs2693958  | 7463878  | 5.27E-01        | CAMTA1    | 4     | rs1518000  | 18398373 | 6.78E-01             | N/A         | -             | 6.21E-07 | 8.07E-01 | 5.94E-05 | 8984                            |  |
| 1     | rs1193188  | 7462117  | 5.27E-01        | CAMTA1    | 4     | rs1518000  | 18398373 | 6.78E-01             | N/A         | -             | 6.21E-07 | 8.41E-01 | 6.63E-05 | 8985                            |  |
| 6     | rs6921041  | 1.36E+08 | 9.29E-01        | PDE7B     | 14    | rs1028535  | 58569128 | 1.01E-01             | N/A         | -             | 6.22E-07 | 2.03E-01 | 3.68E-03 | 8986                            |  |
| 6     | rs6921041  | 1.36E+08 | 9.29E-01        | PDE7B     | 14    | rs2064770  | 58570725 | 1.01E-01             | N/A         | -             | 6.22E-07 | 2.03E-01 | 3.68E-03 | 8987                            |  |
| 19    | rs1005204  | 50342528 | 2.90E-01        | NKPD1     | 20    | rs572715   | 53672362 | 8.41E-01             | N/A         | -             | 6.22E-07 | 5.25E-01 | 3.26E-04 | 8988                            |  |
| 3     | rs12495053 | 24375132 | 9.29E-01        | THRB      | 14    | rs1241771  | 91760538 | 9.11E-01             | N/A         | -             | 6.22E-07 | 6.43E-01 | 4.72E-05 | 8989                            |  |
| 8     | rs12679346 | 34188001 | 4.96E-01        | N/A       | 16    | rs3094773  | 2755238  | 4.17E-01             | SRRM2       | -             | 6.22E-07 | 6.58E-01 | 1.56E-04 | 8990                            |  |
| 3     | rs12495053 | 24375132 | 9.29E-01        | THRB      | 14    | rs1241768  | 91757980 | 9.11E-01             | N/A         | -             | 6.22E-07 | 7.77E-01 | 7.44E-05 | 8991                            |  |
| 2     | rs7594227  | 96969475 | 4.59E-01        | FAM178B   | 4     | rs4693763  | 87450873 | 3.44E-01             | MAPK10      | -             | 6.22E-07 | 3.62E-01 | 3.55E-05 | 8992                            |  |
| 2     | rs7594227  | 96969475 | 4.59E-01        | FAM178B   | 4     | rs4299551  | 87454804 | 3.44E-01             | MAPK10      | -             | 6.22E-07 | 3.76E-01 | 3.79E-05 | 8993                            |  |
| 8     | rs7824600  | 1.22E+08 | 7.20E-01        | MTBP      | 22    | rs5768016  | 46595486 | 9.66E-01             | N/A         | -             | 6.22E-07 | 6.41E-01 | 2.67E-05 | 8994                            |  |
| 6     | rs12660854 | 95455862 | 4.94E-01        | N/A       | 1     | rs16848614 | 2.27E+08 | 6.52E-01             | HIST3H2A    | -             | 6.22E-07 | 3.77E-01 | 4.27E-06 | 8995                            |  |
| 11    | rs421694   | 26667094 | 5.60E-01        | ANO3      | 22    | rs1372070  | 20724749 | 9.98E-01             | N/A         | -             | 6.22E-07 | 8.84E-01 | 1.27E-04 | 8996                            |  |
| 14    | rs1998192  | 28514419 | 4.38E-02        | N/A       | 18    | rs1947494  | 63190117 | 7.67E-01             | N/A         | -             | 6.22E-07 | 9.19E-01 | 5.88E-05 | 8997                            |  |
| 1     | rs2151124  | 62192891 | 8.25E-01        | INADL     | 3     | rs7628487  | 1.3E+08  | 9.73E-01             | N/A         | -             | 6.22E-07 | 5.81E-01 | 5.64E-05 | 8998                            |  |
| 9     | rs10739386 | 1.15E+08 | 5.40E-01        | ZFP37     | 13    | rs1323553  | 48160257 | 4.86E-01             | CYSLTR2     | -             | 6.22E-07 | 8.61E-01 | 9.82E-05 | 8999                            |  |
| 2     | rs12466600 | 52528250 | 3.80E-03        | N/A       | 10    | rs997225   | 67952976 | 8.78E-01             | CTNNA3      | -             | 6.22E-07 | 6.42E-02 | 1.15E-06 | 9000                            |  |
| 10    | rs10508570 | 19228576 | 7.14E-01        | N/A       | 12    | rs762718   | 11835595 | 1.75E-01             | ETV6        | -             | 6.22E-07 | 3.38E-01 | 1.34E-03 | 9001                            |  |
| 4     | rs2085600  | 89998932 | 5.46E-02        | FAM13A    | 5     | rs6863774  | 55730873 | 1.10E-01             | N/A         | -             | 6.22E-07 | N/A      | N/A      | 9002                            |  |
| 6     | rs13217925 | 70642371 | 7.42E-01        | COL19A1   | 15    | rs1317722  | 88382020 | 2.18E-01             | ZNF710      | -             | 6.22E-07 | 2.70E-01 | 9.03E-04 | 9003                            |  |
| 6     | rs10498870 | 70643053 | 7.42E-01        | COL19A1   | 15    | rs1317722  | 88382020 | 2.18E-01             | ZNF710      | -             | 6.22E-07 | 6.00E-01 | 4.93E-04 | 9004                            |  |
| 6     | rs647108   | 1.38E+08 | 4.75E-01        | N/A       | 12    | rs10772751 | 14295548 | 4.15E-02             | N/A         | -             | 6.22E-07 | 4.96E-01 | 1.04E-05 | 9005                            |  |
| 6     | rs911566   | 4421201  | 3.95E-02        | N/A       | 16    | rs11648585 | 23203475 | 4.34E-01             | SCNN1B      | -             | 6.22E-07 | 5.12E-01 | 2.45E-04 | 9006                            |  |
| 5     | rs6876694  | 4442590  | 4.59E-01        | N/A       | 12    | rs10850931 | 1.17E+08 | 7.84E-01             | KSR2        | -             | 6.22E-07 | 4.66E-01 | 3.11E-05 | 9007                            |  |
| 6     | rs2503661  | 92817083 | 2.15E-01        | N/A       | 19    | rs4803630  | 48642923 | 3.09E-01             | LYPD3       | -             | 6.22E-07 | 5.94E-01 | 2.61E-04 | 9008                            |  |
| 5     | rs17154889 | 1.02E+08 | 9.95E-01        | PAM       | 10    | rs2419320  | 1.12E+08 | 2.95E-01             | N/A         | -             | 6.23E-07 | 2.99E-01 | 4.53E-06 | 9009                            |  |
| 2     | rs6733165  | 1.7E+08  | 5.66E-01        | C2orf77   | 7     | rs2158546  | 49596217 | 9.09E-01             | N/A         | -             | 6.23E-07 | 4.46E-01 | 5.43E-06 | 9010                            |  |
| 4     | rs1918179  | 1.23E+08 | 3.16E-01        | N/A       | 5     | rs12910396 | 83229107 | 7.07E-01             | SLC28A1     | -             | 6.23E-07 | 5.74E-01 | 1.25E-04 | 9011                            |  |
| 10    | rs10904442 | 5252361  | 3.43E-01        | AKR1C4    | 16    | rs11648508 | 56621014 | 5.32E-01             | MMP15       | -             | 6.23E-07 | 7.81E-01 | 9.32E-05 | 9012                            |  |
| 2     | rs11688108 | 29987967 | 8.36E-01        | ALK       | 11    | rs4300383  | 42610668 | 8.20E-01             | N/A         | -             | 6.23E-07 | 5.02E-01 | 1.57E-05 | 9013                            |  |
| 6     | rs1057985  | 44293879 | 6.85E-01        | SLC29A1   | 8     | rs4841386  | 10481589 | 6.08E-01             | RP1L1       | -             | 6.23E-07 | 9.58E-02 | 3.94E-06 | 9014                            |  |
| 2     | rs6433123  | 1.52E+08 | 9.93E-01        | N/A       | 10    | rs11595073 | 1.24E+08 | 4.90E-01             | TACC2       | -             | 6.23E-07 | 8.84E-02 | 5.14E-03 | 9015                            |  |
| 7     | rs17171480 | 35552194 | 6.06E-01        | N/A       | 8     | rs10958045 | 82885549 | 3.66E-01             | SNX16       | -             | 6.23E-07 | 6.78E-01 | 8.66E-05 | 9016                            |  |
| 3     | rs7653315  | 1.33E+08 | 4.04E-01        | N/A       | 15    | rs7183261  | 92129998 | 3.06E-01             | N/A         | -             | 6.23E-07 | 2.67E-01 | 4.93E-06 | 9017                            |  |
| 3     | rs9857771  | 1.03E+08 | 1.69E-01        | LOC152225 | 15    | rs2116207  | 84729595 | 4.73E-01             | AGBL1       | -             | 6.23E-07 | 2.90E-01 | 7.41E-04 | 9018                            |  |
| 4     | rs7659432  | 1.82E+08 | 7.97E-01        | N/A       | 19    | rs7259371  | 38226481 | 8.16E-01             | RHPN2       | -             | 6.23E-07 | 8.03E-01 | 1.03E-04 | 9019                            |  |
| 1     | rs10911412 | 1.82E+08 | 9.70E-01        | RGL1      | 16    | rs12933084 | 82918034 | 1.52E-01             | WDFC1       | -             | 6.23E-07 | 5.79E-01 | 7.04E-05 | 9020                            |  |
| 6     | rs6929774  | 33670698 | 3.67E-01        | C6orf227  | 9     | rs296639   | 92880480 | 2.69E-01             | N/A         | MHC           | 6.23E-07 | 7.39E-01 | 6.83E-04 | 9021                            |  |
| 2     | rs6719991  | 2.41E+08 | 8.27E-01        | AGXT      | 8     | rs7835759  | 19226201 | 3.02E-01             | N/A         | -             | 6.23E-07 | 5.68E-01 | 2.91E-05 | 9022                            |  |
| 14    | rs1279329  | 32645873 | 3.69E-01        | NPAS3     | 15    | rs1346037  | 59925203 | 7.83E-01             | VPS13C      | -             | 6.24E-07 | 2.29E-01 | 1.18E-03 | 9023                            |  |
| 1     | rs12089317 | 22625714 | 4.12E-01        | N/A       | 11    | rs12787445 | 1.08E+08 | 3.47E-01             | ACAT1       | -             | 6.24E-07 | 7.90E-01 | 1.07E-04 | 9024                            |  |
| 6     | rs2064501  | 1.38E+08 | 5.73E-02        | IL22RA2   | 7     | rs4404863  | 1.36E+08 | 1.50E-01             | N/A         | -             | 6.24E-07 | 1.90E-01 | 8.53E-06 | 9025                            |  |
| 1     | rs766499   | 2.13E+08 | 4.42E-01        | SMYD2     | 13    | rs12584295 | 1.08E+08 | 7.00E-02             | N/A         | -             | 6.24E-07 | 8.02E-01 | 1.66E-05 | 9026                            |  |
| 2     | rs780049   | 1.25E+08 | 1.26E-01        | CNTNAP5   | 10    | rs10903382 | 1189313  | 6.90E-01             | NCRN/A00200 | -             | 6.24E-07 | 9.37E-01 | 2.38E-04 | 9027                            |  |
| 8     | rs12155569 | 1.22E+08 | 7.17E-01        | MTBP      | 22    | rs5768016  | 46595486 | 9.66E-01             | N/A         | -             | 6.24E-07 | 6.08E-01 | 2.40E-05 | 9028                            |  |
| 6     | rs2297846  | 1.45E+08 | 8.19E-01        | UTRN      | 10    | rs12415753 | 31456921 | 7.29E-01             | N/A         | -             | 6.24E-07 | 7.14E-01 | 7.03E-05 | 9029                            |  |
| 8     | rs2882460  | 62688450 | 3.00E-01        |           |       |            |          |                      |             |               |          |          |          |                                 |  |

| SNP A |            |          |                 |          | SNP B |            |          |                    |             | Interaction P |          |          | Ranking  | Cluster in top 100 interactions |  |
|-------|------------|----------|-----------------|----------|-------|------------|----------|--------------------|-------------|---------------|----------|----------|----------|---------------------------------|--|
| CHR   | SNP        | Location | gle locus P val | Gene     | CHR   | SNP        | Location | single locus P val | Gene        | MHC region    | Stage 1  | Stage 2  | Combined |                                 |  |
| 1     | rs803675   | 44125824 | 1.95E-01        | ST3GAL3  | 18    | rs1720464  | 1003959  | 9.85E-01           | N/A         | -             | 6.27E-07 | 8.43E-01 | 1.89E-05 | 9071                            |  |
| 1     | rs803675   | 44125824 | 1.95E-01        | ST3GAL3  | 18    | rs789040   | 1007587  | 9.85E-01           | N/A         | -             | 6.27E-07 | 8.43E-01 | 1.89E-05 | 9072                            |  |
| 1     | rs803675   | 44125824 | 1.95E-01        | ST3GAL3  | 18    | rs789071   | 998339   | 9.85E-01           | N/A         | -             | 6.27E-07 | 9.61E-01 | 2.42E-05 | 9073                            |  |
| 1     | rs803675   | 44125824 | 1.95E-01        | ST3GAL3  | 18    | rs789072   | 998417   | 9.85E-01           | N/A         | -             | 6.27E-07 | 9.61E-01 | 2.42E-05 | 9074                            |  |
| 12    | rs12230272 | 1.24E+08 | 8.24E-01        | N/A      | 13    | rs9542786  | 71412634 | 3.39E-02           | N/A         | -             | 6.27E-07 | 2.78E-01 | 3.30E-06 | 9075                            |  |
| 2     | rs968763   | 7946176  | 3.61E-01        | N/A      | 14    | rs1412176  | 76109537 | 4.29E-01           | N/A         | -             | 6.27E-07 | 7.08E-01 | 1.44E-04 | 9076                            |  |
| 1     | rs1122396  | 1.99E+08 | 2.50E-01        | TMEM9    | 5     | rs10065181 | 1.74E+08 | 2.82E-01           | N/A         | -             | 6.27E-07 | 8.17E-01 | 2.46E-05 | 9077                            |  |
| 6     | rs9358619  | 9390197  | 3.16E-01        | N/A      | 9     | rs2297879  | 35652251 | 3.82E-01           | SIT1        | -             | 6.27E-07 | 9.06E-01 | 1.67E-04 | 9078                            |  |
| 1     | rs1538686  | 1.95E+08 | 9.57E-01        | KCNT2    | 10    | rs4750552  | 14771455 | 7.55E-01           | FAM107B     | -             | 6.27E-07 | 9.39E-01 | 1.07E-04 | 9079                            |  |
| 6     | rs12212773 | 1.55E+08 | 1.06E-01        | IPCEF1   | 10    | rs7341996  | 4111705  | 7.54E-01           | N/A         | -             | 6.27E-07 | 5.11E-01 | 3.88E-04 | 9080                            |  |
| 8     | rs17418933 | 4598479  | 5.45E-01        | CSMD1    | 8     | rs10504145 | 53972009 | 9.58E-01           | N/A         | -             | 6.27E-07 | 8.40E-01 | 6.40E-05 | 9081                            |  |
| 1     | rs10864504 | 11398790 | 1.07E-01        | N/A      | 15    | rs4965726  | 99202209 | 4.48E-01           | N/A         | -             | 6.27E-07 | 3.70E-01 | 8.91E-06 | 9082                            |  |
| 1     | rs12049593 | 2.32E+08 | 3.22E-01        | SLC35F3  | 4     | rs1397453  | 67184018 | 5.92E-01           | N/A         | -             | 6.27E-07 | 6.53E-01 | 3.95E-04 | 9083                            |  |
| 3     | rs7633179  | 56907748 | 7.99E-01        | ARHGEF3  | 3     | rs11914998 | 1.49E+08 | 8.61E-01           | N/A         | -             | 6.27E-07 | N/A      | N/A      | 9084                            |  |
| 7     | rs2392362  | 35367972 | 5.04E-02        | N/A      | 8     | rs11779508 | 1.43E+08 | 7.59E-01           | FLJ43860    | -             | 6.28E-07 | 4.83E-01 | 8.16E-04 | 9085                            |  |
| 6     | rs9487771  | 1.12E+08 | 8.81E-01        | N/A      | 8     | rs636173   | 11986337 | 2.75E-01           | IMPA2       | -             | 6.28E-07 | 6.71E-01 | 1.59E-04 | 9086                            |  |
| 9     | rs10812053 | 24472743 | 7.55E-01        | N/A      | 15    | rs1077015  | 99718796 | 5.21E-01           | PCSK6       | -             | 6.28E-07 | 9.60E-01 | 4.88E-05 | 9087                            |  |
| 11    | rs10840332 | 99377077 | 9.64E-01        | SBF2     | 21    | rs2824920  | 18881236 | 9.16E-01           | N/A         | -             | 6.28E-07 | 6.17E-01 | N/A      | 9088                            |  |
| 10    | rs6480474  | 72441686 | 4.22E-01        | N/A      | 20    | rs1201889  | 58690346 | 9.74E-01           | N/A         | -             | 6.28E-07 | 6.53E-01 | 4.01E-05 | 9089                            |  |
| 11    | rs516450   | 1.02E+08 | 9.54E-02        | MMP10    | 20    | rs6056801  | 968318   | 1.37E-01           | N/A         | -             | 6.28E-07 | N/A      | N/A      | 9090                            |  |
| 14    | rs4901494  | 53738263 | 9.60E-01        | N/A      | 16    | rs1150556  | 81828042 | 1.99E-01           | CDH13       | -             | 6.28E-07 | N/A      | N/A      | 9091                            |  |
| 2     | rs6729109  | 1.05E+08 | 5.15E-02        | N/A      | 11    | rs5028798  | 34562011 | 1.26E-01           | N/A         | -             | 6.28E-07 | N/A      | N/A      | 9092                            |  |
| 2     | rs919868   | 1.74E+08 | 5.53E-01        | N/A      | 2     | rs10209084 | 2.4E+08  | 4.29E-01           | HDAC4       | -             | 6.28E-07 | 2.74E-01 | 9.42E-06 | 9093                            |  |
| 4     | rs6448494  | 10708616 | 7.44E-01        | N/A      | 13    | rs1359066  | 48550422 | 5.19E-01           | FNDC3A      | -             | 6.28E-07 | 4.79E-01 | 6.20E-04 | 9094                            |  |
| 2     | rs6709502  | 30864428 | 9.17E-01        | CAPN13   | 11    | rs563272   | 1.16E+08 | 7.58E-01           | N/A         | -             | 6.28E-07 | 2.38E-01 | 1.69E-06 | 9095                            |  |
| 2     | rs4669167  | 5310781  | 6.00E-01        | N/A      | 9     | rs3739795  | 1.02E+08 | 3.34E-01           | ERP44       | -             | 6.28E-07 | 4.03E-01 | 6.35E-04 | 9096                            |  |
| 3     | rs9422     | 1.25E+08 | 8.04E-01        | MYLK     | 12    | rs1635135  | 1.12E+08 | 2.15E-01           | OAS2        | -             | 6.28E-07 | 8.60E-01 | 3.05E-05 | 9097                            |  |
| 10    | rs7909341  | 1.34E+08 | 9.28E-01        | N/A      | 22    | rs16992538 | 43363969 | 4.92E-01           | NCRN/A00207 | -             | 6.28E-07 | 6.06E-01 | 2.12E-05 | 9098                            |  |
| 11    | rs10750352 | 1.26E+08 | 6.61E-01        | KIRREL3  | 12    | rs2160732  | 13872593 | 3.79E-02           | GRIN2B      | -             | 6.28E-07 | 6.75E-01 | 7.54E-04 | 9099                            |  |
| 1     | rs7418397  | 1.05E+08 | 2.50E-02        | N/A      | 12    | rs164364   | 1E+08    | 7.79E-01           | SLC5A8      | -             | 6.28E-07 | 8.05E-01 | 7.82E-05 | 9100                            |  |
| 1     | rs648011   | 2.24E+08 | 5.54E-01        | DN/AH14  | 4     | rs11726933 | 1.05E+08 | 8.59E-01           | N/A         | -             | 6.28E-07 | 5.28E-01 | 5.35E-04 | 9101                            |  |
| 7     | rs10250954 | 22441474 | 5.74E-01        | MGC87042 | 16    | rs4238833  | 88578190 | 7.85E-01           | AFG3L1      | -             | 6.28E-07 | 9.81E-01 | 5.92E-05 | 9102                            |  |
| 8     | rs12681931 | 23305405 | 2.01E-01        | LOXL2    | 18    | rs1560434  | 69656491 | 9.19E-01           | N/A         | -             | 6.28E-07 | 2.90E-01 | 1.48E-05 | 9103                            |  |
| 5     | rs4571472  | 15774360 | 3.10E-01        | FBXL7    | 10    | rs7075349  | 64097655 | 2.74E-01           | ZNF365      | -             | 6.28E-07 | 1.93E-03 | 3.38E-09 | 9104                            |  |
| 9     | rs7873308  | 23415710 | 6.87E-01        | N/A      | 11    | rs2000560  | 87328786 | 6.43E-02           | N/A         | -             | 6.28E-07 | 1.31E-01 | 1.18E-06 | 9105                            |  |
| 2     | rs897877   | 2.19E+08 | 6.02E-01        | PNKD     | 4     | rs3762864  | 1.4E+08  | 4.37E-01           | ELF2        | -             | 6.28E-07 | 2.04E-01 | 3.16E-03 | 9106                            |  |
| 6     | rs6931002  | 1.58E+08 | 4.57E-01        | SNX9     | 11    | rs2850303  | 1.13E+08 | 6.79E-01           | NCAM1       | -             | 6.29E-07 | 1.50E-01 | 3.31E-03 | 9107                            |  |
| 9     | rs7870760  | 1.34E+08 | 4.42E-02        | NTNG2    | 15    | rs7167668  | 99720676 | 6.25E-01           | PCSK6       | -             | 6.29E-07 | 7.27E-01 | 4.11E-05 | 9108                            |  |
| 1     | rs1324727  | 1.19E+08 | 3.52E-01        | N/A      | 7     | rs39446    | 25095313 | 3.67E-01           | N/A         | -             | 6.29E-07 | 9.69E-01 | 1.09E-04 | 9109                            |  |
| 14    | rs4901977  | 59859929 | 6.13E-01        | N/A      | 16    | rs4275868  | 7289778  | 9.72E-01           | A2BP1       | -             | 6.29E-07 | 2.90E-02 | 1.97E-07 | 9110                            |  |
| 6     | rs4534020  | 1.21E+08 | 1.83E-01        | N/A      | 6     | rs11756851 | 1.55E+08 | 7.33E-01           | N/A         | -             | 6.29E-07 | 2.83E-01 | 2.44E-04 | 9111                            |  |
| 8     | rs11203713 | 15486984 | 4.01E-01        | TUSC3    | 12    | rs795484   | 1.17E+08 | 6.00E-01           | TAOK3       | -             | 6.29E-07 | 6.92E-02 | 9.75E-03 | 9112                            |  |
| 12    | rs7976486  | 74660715 | 3.38E-01        | N/A      | 13    | rs1147467  | 30974678 | 8.93E-01           | N/A         | -             | 6.29E-07 | 7.75E-02 | 3.74E-03 | 9113                            |  |
| 1     | rs10494336 | 1.58E+08 | 7.15E-01        | ATP1A2   | 8     | rs7005426  | 1.19E+08 | 1.00E-01           | N/A         | -             | 6.29E-07 | 2.30E-01 | 6.36E-06 | 9114                            |  |
| 14    | rs6572524  | 48440753 | 2.04E-01        | N/A      | 15    | rs2570241  | 49921747 | 2.29E-02           | TMOD3       | -             | 6.29E-07 | 6.18E-01 | 4.55E-04 | 9115                            |  |
| 4     | rs2165387  | 80710844 | 6.07E-02        | N/A      | 7     | rs2390961  | 24266172 | 2.98E-01           | N/A         | -             | 6.29E-07 | 2.96E-01 | 1.11E-05 | 9116                            |  |
| 1     | rs12086212 | 24581327 | 6.75E-01        | GRHL3    | 5     | rs13180182 | 1.51E+08 | 7.83E-02           | SLC36A1     | -             | 6.29E-07 | 7.03E-01 | 4.33E-04 | 9117                            |  |
| 1     | rs3765431  | 24578997 | 6.75E-01        | GRHL3    | 5     | rs13180182 | 1.51E+08 | 7.83E-02           | SLC36A1     | -             | 6.29E-07 | 7.03E-01 | 4.33E-04 | 9118                            |  |
| 3     | rs9815931  | 1.87E+08 | 9.56E-02        | DGKG     | 16    | rs12925884 | 74997300 | 7.42E-01           | CNTNAP4     | -             | 6.29E-07 | 4.96E-01 | 1.91E-03 | 9119                            |  |
| 12    | rs4764273  | 16507430 | 5.26E-01        | N/A      | 14    | rs7155553  | 73171266 | 2.19E-01           | ACOT6       | -             | 6.29E-07 | 7.40E-01 | 1.71E-04 | 9120                            |  |
| 6     | rs9404224  | 1.03E+08 | 7.25E-01        | N/A      | 3     | rs7431637  | 1.45E+08 | 2.55E-01           | SLC9A9      | -             | 6.29E-07 | 8.55E-01 | 1.05E-04 | 9121                            |  |
| 2     | rs1454410  | 1.66E+08 | 8.30E-01        | SLC38A11 | 22    | rs738089   | 19102598 | 4.09E-01           | ZNF74       | -             | 6.29E-07 | 2.88E-02 | 3.46E-07 | 9122                            |  |
| 6     | rs7453429  | 15379675 | 8.41E-02        | JARID2   | 2     | rs1730586  | 36234999 | 9.69E-01           | N/A         | -             | 6.29E-07 | 1.06E-01 | 7.34E-03 | 9123                            |  |
| 6     | rs752992   | 20533437 | 9.32E-01        | EFZ3     | 2     | rs931313   | 1.34E+08 | 2.74E-01           | N/A         | -             | 6.29E-07 | 5.56E-01 | 1.09E-05 | 9124                            |  |
| 3     | rs1847830  | 1.33E+08 | 2.10E-01        | N/A      | 4     | rs1598859  | 1.04E+08 | 8.57E-01           | NFKB1       | -             | 6.29E-07 | 8.95E-01 | 5.41E-05 | 9125                            |  |
| 7     | rs6946884  | 15846661 | 9.92E-01        | N/A      | 7     | rs1035041  | 52419727 | 5.49E-02           | N/A         | -             | 6.29E-07 | 7.33E-01 | 2.43E-04 | 9126                            |  |
| 9     | rs1889006  | 18607804 | 4.71E-01        | ADAMTSL1 | 13    | rs7987126  | 52829614 | 1.35E-01           | N/A         | -             | 6.29E-07 | 8.47E-01 | 7.19E-06 | 9127                            |  |
| 8     | rs12544945 | 63611710 | 4.60E-01        | NKAIN3   | 12    | rs749137   | 1.06E+08 | 6.14E-01           | BTBD11      | -             | 6.29E-07 | 7.70E-01 | 1.47E-04 | 9128                            |  |
| 11    | rs621922   | 93994962 | 2.89E-01        | PIWIL4   | 21    | rs1262636  | 16938048 | 6.20E-01           | N/A         | -             | 6.30E-07 | 6.55E-02 | 8.47E-07 | 9129                            |  |
| 6     | rs2170614  | 2589629  | 2.83E-01        | MYLK4    | 15    | rs2030592  | 35102817 | 4.89E-01           | MEIS2       | -             | 6.30E-07 | 1.03E-01 | 1.89E-03 | 9130                            |  |
| 4     | rs7670864  | 1.58E+08 | 5.45E-01        | N/A      | 19    | rs259270   | 37848843 | 5.40E-01           | ANKRD27     | -             | 6.30E-07 | 2.39E-01 | 9.80E-06 | 9131                            |  |
| 3     | rs2236624  | 1.88E+08 | 2.65E-01        | DGKG     | 7     | rs42530    | 93890431 | 1.99E-01           | COL1A2      | -             | 6.30E-07 | 5.24E-01 | 7.62E-05 | 9132                            |  |
| 2     | rs13404712 | 52797294 | 9.74E-01        | N/A      | 4     | rs13144135 | 1.87E+08 | 3.94E-01           | SORBS2      | -             | 6.30E-07 | 5.27E-01 | 4.42E-06 | 9133                            |  |
| 2     | rs10930874 | 1.8E+08  | 7.84E-01        | ZNF385B  | 7     | rs6463815  | 8506230  | 2.97E-01           | NXP1        | -             | 6.30E-07 | 5.92E-01 | 4.71E-05 | 9134                            |  |
| 3     | rs6796724  | 1.74E+08 | 5.99E-01        | NCEH1    | 7     | rs13240443 | 57212608 | 5.19E-01           | ZNF479      | -             | 6.30E-07 | 5.57E-01 | 1.18E-05 | 9135                            |  |
| 1     | rs10789446 | 38813821 | 9.21E-01        | N/A      | 12    | rs17353923 | 16219962 | 5.92E-01           | N/A         | -             | 6.30E-07 | 4.57E-01 | 2.29E-03 | 9136                            |  |
| 4     | rs2715388  | 1.8E+08  | 3.74E-01        | N/A      | 7     | rs10261275 | 11905958 | 6.94E-01           | N/A         | -             | 6.30E-07 | 8.38E-01 | 2.45E-05 | 9137                            |  |
| 2     | rs1974689  | 64999950 | 7.68E-01        | N/A      | 15    | rs9672398  | 51666533 | 7.53E-01           | WDR72       | -             | 6.30E-07 | 2.97E-01 | 1.14E-03 | 9138                            |  |
| 6     | rs2063474  | 24053250 | 2.20E-01        | N/A      | 7     | rs2385143  | 1.04E+08 | 5.45E-01           | N/A         | -             | 6.30E-07 | 5.06E-01 | 5.46E-05 | 9139                            |  |
| 1     | rs3121168  | 56570711 | 3.74E-01        | N/A      | 5     | rs2052527  | 1.66E+08 | 7.26E-01           | N/A         | -             | 6.30E-07 | 1.88E-01 | 3.77E-06 | 9140                            |  |
| 13    | rs9598051  | 33216946 | 8.31E-01        | N/A      | 18    | rs763361   | 65682622 | 4.97E-01           | DOK6        | -             | 6.30E-07 | 2.17E-01 | 7.85E-07 | 9141                            |  |
| 6     | rs1569579  | 24621615 | 3.83E-03        | ALDH5A1  | 7     | rs1023300  | 51661855 | 7.95E-01           | N/A         | -             | 6.30E-07 | 5.35E-01 | 2.31E-05 | 9142                            |  |

| SNP A |            |          |                           |          | SNP B |            |          |                           |          | Interaction P |          |          | Ranking  | Cluster in top 100 interactions |  |
|-------|------------|----------|---------------------------|----------|-------|------------|----------|---------------------------|----------|---------------|----------|----------|----------|---------------------------------|--|
| CHR   | SNP        | Location | log <sub>10</sub> P value | Gene     | CHR   | SNP        | Location | log <sub>10</sub> P value | Gene     | MHC region    | Stage 1  | Stage 2  | Combined |                                 |  |
| 2     | rs238625   | 8305547  | 6.67E-01                  | N/A      | 8     | rs1178708  | 143E+08  | 7.59E-01                  | N/A      | -             | 6.32E-07 | 3.02E-01 | 2.06E-05 | 9183                            |  |
| 12    | rs7296020  | 6159594  | 4.84E-01                  | PPM1H    | 13    | rs2352192  | 91373182 | 8.48E-01                  | GPC5     | -             | 6.32E-07 | 8.35E-01 | 1.89E-04 | 9184                            |  |
| 2     | rs9750891  | 2.34E+08 | 8.23E-01                  | INPP5D   | 4     | rs468457   | 15826043 | 8.44E-01                  | FLJ39653 | -             | 6.32E-07 | 9.70E-01 | 1.43E-04 | 9185                            |  |
| 4     | rs918402   | 1.82E+08 | 2.52E-01                  | N/A      | 13    | rs9534199  | 45189527 | 6.31E-01                  | SPERT    | -             | 6.32E-07 | 1.66E-03 | 1.50E-08 | 9186                            |  |
| 14    | rs8010088  | 36259816 | 1.26E-01                  | SLC25A21 | 18    | rs2365332  | 42295148 | 7.84E-01                  | RNF165   | -             | 6.32E-07 | 6.68E-01 | 9.52E-04 | 9187                            |  |
| 10    | rs11596728 | 12685893 | 8.39E-01                  | CAMK1D   | 16    | rs151696   | 17976386 | 8.06E-01                  | N/A      | -             | 6.32E-07 | 4.62E-01 | 4.21E-04 | 9188                            |  |
| 5     | rs7705243  | 35155303 | 8.67E-01                  | PRLR     | 15    | rs1163215  | 43839682 | 5.18E-01                  | N/A      | -             | 6.32E-07 | 6.13E-01 | 1.57E-04 | 9189                            |  |
| 12    | rs721793   | 66720281 | 1.22E-01                  | N/A      | 15    | rs12439503 | 98679389 | 7.51E-01                  | ADAMTS17 | -             | 6.32E-07 | N/A      | N/A      | 9190                            |  |
| 9     | rs2841490  | 87117835 | 4.48E-01                  | N/A      | 15    | rs17648051 | 91063933 | 4.00E-01                  | N/A      | -             | 6.32E-07 | 2.45E-02 | 1.34E-07 | 9191                            |  |
| 2     | rs2289200  | 2.16E+08 | 8.14E-01                  | FN1      | 7     | rs6952109  | 88033266 | 5.62E-01                  | N/A      | -             | 6.32E-07 | 6.77E-01 | 2.41E-04 | 9192                            |  |
| 5     | rs492842   | 78445743 | 7.97E-01                  | BHMT     | 16    | rs1423797  | 63846744 | 1.23E-01                  | N/A      | -             | 6.32E-07 | 8.62E-01 | 9.43E-05 | 9193                            |  |
| 11    | rs4930351  | 65823240 | 1.20E-01                  | TMEM151A | 18    | rs2849210  | 63661045 | 1.99E-01                  | N/A      | -             | 6.33E-07 | 2.63E-01 | 3.90E-06 | 9194                            |  |
| 10    | rs4749844  | 9326574  | 8.09E-01                  | N/A      | 16    | rs1383361  | 72231717 | 8.81E-01                  | N/A      | -             | 6.33E-07 | 6.35E-01 | 3.46E-05 | 9195                            |  |
| 1     | rs17625634 | 1.76E+08 | 7.60E-01                  | N/A      | 16    | rs1150111  | 77489180 | 4.14E-02                  | WVVOX    | -             | 6.33E-07 | 6.65E-01 | 1.95E-05 | 9196                            |  |
| 3     | rs16854239 | 1.71E+08 | 3.84E-01                  | MECOM    | 8     | rs4872278  | 24911501 | 3.94E-01                  | N/A      | -             | 6.33E-07 | 6.81E-01 | 5.10E-05 | 9197                            |  |
| 12    | rs2283306  | 2359651  | 3.69E-01                  | CACNA1C  | 20    | rs4811033  | 48392648 | 4.65E-01                  | N/A      | -             | 6.33E-07 | 5.04E-01 | 5.16E-04 | 9198                            |  |
| 2     | rs883844   | 1.92E+08 | 8.59E-01                  | GLS      | 2     | rs6436670  | 2.28E+08 | 3.77E-01                  | COL4A3   | -             | 6.33E-07 | 5.30E-01 | 1.71E-05 | 9199                            |  |
| 12    | rs1108385  | 2352591  | 3.69E-01                  | CACNA1C  | 20    | rs4811033  | 48392648 | 4.65E-01                  | N/A      | -             | 6.33E-07 | 5.51E-01 | 4.44E-04 | 9200                            |  |
| 6     | rs3943166  | 76986284 | 4.64E-01                  | N/A      | 11    | rs4550210  | 40729088 | 1.06E-01                  | N/A      | -             | 6.33E-07 | 7.52E-01 | 1.56E-04 | 9201                            |  |
| 6     | rs2844665  | 31114834 | 8.49E-01                  | HCG22    | 22    | rs2071762  | 43636988 | 5.14E-01                  | PHF21B   | MHC           | 6.33E-07 | 8.38E-01 | 2.64E-04 | 9202                            |  |
| 7     | rs306721   | 79740223 | 3.85E-01                  | N/A      | 8     | rs1455583  | 63975240 | 1.06E-01                  | NKAIN3   | -             | 6.33E-07 | 5.16E-02 | 5.87E-07 | 9203                            |  |
| 11    | rs16907631 | 21164119 | 1.45E-01                  | NELL1    | 12    | rs1084178  | 21309410 | 9.69E-01                  | SLCO1A2  | -             | 6.33E-07 | 3.52E-01 | 7.20E-04 | 9204                            |  |
| 11    | rs260858   | 1.03E+08 | 1.08E-01                  | PDGFD    | 19    | rs11668141 | 3708409  | 1.06E-01                  | APBA3    | -             | 6.33E-07 | 8.37E-02 | 4.08E-06 | 9205                            |  |
| 10    | rs2814317  | 88047586 | 7.83E-01                  | GRID1    | 10    | rs4917503  | 1.09E+08 | 8.54E-01                  | N/A      | -             | 6.33E-07 | 1.04E-01 | 1.36E-06 | 9206                            |  |
| 1     | rs1410397  | 1.92E+08 | 4.39E-01                  | N/A      | 22    | rs131853   | 46141822 | 2.23E-01                  | N/A      | -             | 6.34E-07 | 1.09E-01 | 5.89E-07 | 9207                            |  |
| 1     | rs1113239  | 1.92E+08 | 4.39E-01                  | N/A      | 22    | rs131853   | 46141822 | 2.23E-01                  | N/A      | -             | 6.34E-07 | 1.30E-01 | 7.43E-07 | 9208                            |  |
| 8     | rs209973   | 17595134 | 4.36E-01                  | MTUS1    | 12    | rs17129591 | 40286489 | 5.32E-01                  | N/A      | -             | 6.34E-07 | 3.25E-01 | 1.41E-05 | 9209                            |  |
| 4     | rs4241809  | 1.87E+08 | 5.84E-01                  | SORBS2   | 5     | rs2962365  | 17308515 | 9.31E-01                  | BASP1    | -             | 6.34E-07 | 1.75E-01 | 2.10E-06 | 9210                            |  |
| 12    | rs3847896  | 23051233 | 1.41E-02                  | N/A      | 16    | rs1273422  | 8756514  | 9.67E-01                  | ABAT     | -             | 6.34E-07 | 9.25E-01 | 9.97E-05 | 9211                            |  |
| 1     | rs17100624 | 97793543 | 1.62E-01                  | DPYD     | 10    | rs2420255  | 1.18E+08 | 2.57E-01                  | GFRA1    | -             | 6.34E-07 | 8.38E-01 | 2.16E-04 | 9212                            |  |
| 5     | rs10040610 | 6406815  | 2.75E-01                  | MED10    | 9     | rs3789892  | 92611380 | 8.51E-01                  | N/A      | -             | 6.34E-07 | 3.01E-01 | 2.38E-06 | 9213                            |  |
| 9     | rs1410964  | 24262883 | 6.51E-01                  | N/A      | 12    | rs1105165  | 31945102 | 6.68E-01                  | N/A      | -             | 6.34E-07 | 2.08E-01 | 1.28E-03 | 9214                            |  |
| 8     | rs1565741  | 16799856 | 1.33E-01                  | N/A      | 10    | rs10509252 | 67491726 | 6.44E-01                  | CTNNA3   | -             | 6.34E-07 | 3.30E-01 | 1.00E-03 | 9215                            |  |
| 6     | rs10447418 | 1.31E+08 | 2.49E-01                  | SAMD3    | 9     | rs2418076  | 1.12E+08 | 3.34E-01                  | TXN      | -             | 6.34E-07 | 6.89E-01 | 5.74E-05 | 9216                            |  |
| 8     | rs9644041  | 25377198 | 8.17E-01                  | KCTD9    | 12    | rs10492261 | 1.14E+08 | 8.29E-01                  | N/A      | -             | 6.34E-07 | 1.68E-01 | 1.75E-06 | 9217                            |  |
| 8     | rs9644041  | 25377198 | 8.17E-01                  | KCTD9    | 12    | rs11067378 | 1.14E+08 | 8.29E-01                  | N/A      | -             | 6.34E-07 | 1.78E-01 | 1.92E-06 | 9218                            |  |
| 3     | rs779165   | 22077711 | 2.06E-01                  | N/A      | 9     | rs13288671 | 1.37E+08 | 6.20E-01                  | COL5A1   | -             | 6.34E-07 | 3.34E-01 | 1.44E-03 | 9219                            |  |
| 20    | rs4811050  | 48414077 | 8.82E-01                  | N/A      | 22    | rs12159191 | 43022888 | 1.97E-01                  | KIAA1644 | -             | 6.34E-07 | 1.34E-01 | 2.03E-06 | 9220                            |  |
| 15    | rs12592193 | 80303094 | 6.37E-01                  | EFTUD1   | 12    | rs5751902  | 23326630 | 2.18E-01                  | GGT1     | -             | 6.34E-07 | 9.93E-01 | 9.53E-06 | 9221                            |  |
| 5     | rs1152168  | 1.03E+08 | 7.35E-02                  | N/A      | 22    | rs1463604  | 30005035 | 3.95E-01                  | N/A      | -             | 6.34E-07 | 7.03E-01 | 2.05E-05 | 9222                            |  |
| 5     | rs889268   | 37917929 | 2.47E-01                  | N/A      | 12    | rs10845252 | 11010287 | 3.83E-01                  | PRH1     | -             | 6.34E-07 | 7.18E-01 | 2.69E-04 | 9223                            |  |
| 13    | rs10492646 | 1.06E+08 | 7.68E-01                  | N/A      | 17    | rs1492219  | 48083872 | 8.58E-01                  | N/A      | -             | 6.35E-07 | 3.27E-01 | 1.98E-05 | 9224                            |  |
| 2     | rs12712127 | 1.02E+08 | 3.78E-01                  | N/A      | 3     | rs7622275  | 1.49E+08 | 7.49E-01                  | N/A      | -             | 6.35E-07 | 9.91E-01 | 1.37E-04 | 9225                            |  |
| 5     | rs1445978  | 60890827 | 3.01E-01                  | ZSVIM6   | 13    | rs16968984 | 1.06E+08 | 4.53E-01                  | N/A      | -             | 6.35E-07 | 4.39E-01 | 5.11E-06 | 9226                            |  |
| 2     | rs952822   | 52704577 | 2.36E-01                  | N/A      | 5     | rs1316184  | 1.2E+08  | 4.89E-01                  | PRR16    | -             | 6.35E-07 | 4.55E-01 | 3.52E-04 | 9227                            |  |
| 1     | rs10873827 | 87527272 | 2.21E-01                  | N/A      | 1     | rs631230   | 1.15E+08 | 9.64E-01                  | N/A      | -             | 6.35E-07 | 7.61E-01 | 2.83E-05 | 9228                            |  |
| 10    | rs4750665  | 15603456 | 4.86E-02                  | ITGA8    | 22    | rs4282002  | 26350555 | 9.72E-01                  | N/A      | -             | 6.35E-07 | 5.27E-01 | 4.07E-06 | 9229                            |  |
| 8     | rs3750306  | 1.39E+08 | 7.03E-01                  | FAM135B  | 12    | rs11059243 | 1.27E+08 | 1.69E-01                  | N/A      | -             | 6.35E-07 | N/A      | N/A      | 9230                            |  |
| 14    | rs2352900  | 48441520 | 1.86E-01                  | N/A      | 15    | rs8031045  | 49931596 | 2.60E-02                  | TMOD3    | -             | 6.35E-07 | 5.46E-01 | 4.56E-04 | 9231                            |  |
| 5     | rs334470   | 16565364 | 7.81E-01                  | FAM134B  | 19    | rs4804000  | 51968294 | 4.75E-01                  | SLC1A5   | -             | 6.35E-07 | 5.35E-01 | 1.03E-04 | 9232                            |  |
| 1     | rs1132185  | 12743457 | 4.07E-01                  | C1orf158 | 8     | rs2741098  | 6677686  | 2.86E-01                  | XKR5     | -             | 6.35E-07 | 7.74E-01 | 4.16E-05 | 9233                            |  |
| 12    | rs10770444 | 8341081  | 6.06E-01                  | N/A      | 18    | rs2847286  | 12807815 | 5.51E-01                  | PTPN2    | -             | 6.35E-07 | 9.86E-01 | 2.23E-04 | 9234                            |  |
| 9     | rs2251530  | 86002760 | 4.40E-01                  | N/A      | 9     | rs581558   | 1.27E+08 | 8.25E-01                  | GOLGA1   | -             | 6.35E-07 | 7.84E-01 | 9.98E-05 | 9235                            |  |
| 1     | rs3010888  | 12710219 | 4.08E-01                  | AADACL3  | 8     | rs2741098  | 6677686  | 2.86E-01                  | XKR5     | -             | 6.35E-07 | 9.39E-01 | 6.56E-05 | 9236                            |  |
| 4     | rs6552935  | 1.87E+08 | 1.33E-02                  | SORBS2   | 20    | rs2426843  | 57814240 | 7.05E-01                  | PHACTR3  | -             | 6.35E-07 | 9.93E-02 | 5.46E-03 | 9237                            |  |
| 5     | rs10447192 | 8949731  | 9.66E-01                  | N/A      | 20    | rs6074558  | 13045311 | 9.77E-01                  | SPTL3    | -             | 6.35E-07 | 1.93E-01 | 1.12E-03 | 9238                            |  |
| 8     | rs4602870  | 68905107 | 7.27E-02                  | N/A      | 17    | rs11868948 | 10154767 | 5.03E-01                  | MYH13    | -             | 6.35E-07 | 6.83E-01 | 1.63E-04 | 9239                            |  |
| 8     | rs4602870  | 68905107 | 7.27E-02                  | N/A      | 17    | rs4451985  | 10157958 | 5.03E-01                  | MYH13    | -             | 6.35E-07 | 8.01E-01 | 1.22E-04 | 9240                            |  |
| 6     | rs9689723  | 1.5E+08  | 6.32E-02                  | KATNA1   | 4     | rs1842534  | 34244414 | 3.80E-01                  | N/A      | -             | 6.35E-07 | 9.01E-02 | 1.43E-03 | 9241                            |  |
| 6     | rs732498   | 1.6E+08  | 5.30E-01                  | SOD2     | 12    | rs7133563  | 5308881  | 6.30E-01                  | N/A      | -             | 6.35E-07 | 5.80E-01 | 3.05E-05 | 9242                            |  |
| 2     | rs2341991  | 16854392 | 8.05E-01                  | N/A      | 21    | rs6518237  | 45627380 | 4.76E-01                  | N/A      | -             | 6.35E-07 | 6.56E-01 | 4.07E-04 | 9243                            |  |
| 8     | rs10102945 | 61469669 | 7.77E-01                  | N/A      | 20    | rs2425464  | 39997455 | 4.56E-01                  | N/A      | -             | 6.35E-07 | 4.25E-02 | 1.83E-07 | 9244                            |  |
| 1     | rs4908382  | 28155065 | 2.56E-01                  | EYA3     | 10    | rs478839   | 89721850 | 9.83E-01                  | PTEN     | -             | 6.36E-07 | 1.71E-01 | 3.20E-06 | 9245                            |  |
| 8     | rs12544945 | 63611710 | 4.60E-01                  | NKAIN3   | 12    | rs7973935  | 1.06E+08 | 6.57E-01                  | BTBD11   | -             | 6.36E-07 | 7.70E-01 | 1.47E-04 | 9246                            |  |
| 1     | rs735937   | 95108357 | 2.74E-01                  | SLC44A3  | 7     | rs67184    | 1.05E+08 | 2.78E-01                  | ATXN7L1  | -             | 6.36E-07 | 5.87E-01 | 3.86E-04 | 9247                            |  |
| 2     | rs4675140  | 2.28E+08 | 5.70E-01                  | COL4A4   | 8     | rs4243888  | 1.39E+08 | 7.31E-01                  | FAM135B  | -             | 6.36E-07 | 9.04E-02 | 4.92E-07 | 9248                            |  |
| 5     | rs7725801  | 1.22E+08 | 6.92E-01                  | SNCAIP   | 11    | rs11037211 | 43006402 | 8.33E-01                  | N/A      | -             | 6.36E-07 | 7.17E-01 | 7.07E-05 | 9249                            |  |
| 1     | rs7514281  | 1.88E+08 | 4.90E-01                  | N/A      | 4     | rs10028606 | 1.89E+08 | 4.98E-01                  | N/A      | -             | 6.36E-07 | 2.62E-01 | 9.62E-04 | 9250                            |  |
| 6     | rs9356355  | 1.66E+08 | 1.05E-01                  | C6orf118 | 5     | rs10079374 | 17863895 | 8.53E-01                  | N/A      | -             | 6.36E-07 | 7.14E-01 | 4.03E-05 | 9251                            |  |
| 4     | rs1108256  | 77987610 | 4.33E-01                  | N/A      | 8     | rs4909749  | 1.39E+08 | 1.25E-01                  | FAM135B  | -             | 6.36E-07 | 7.21E-01 | 3.59E-06 | 9252                            |  |
| 3     | rs4560291  | 62187202 | 4.94E-01                  | PTPRG    | 9     | rs1442528  | 17319964 | 7.90E-01                  | CNTLN    | -             | 6.36E-07 | 9.12E-01 | 1.51E-04 | 9253                            |  |
| 2     | rs4616447  | 1.7E+08  | 2.67E-01                  | N/A      | 17    | rs244292   | 50587333 | 4.53E-01                  |          |               |          |          |          |                                 |  |

| SNP A |            |          |                |            | SNP B |            |          |                      |             | Interaction P |          |          | Ranking  | Cluster in top 100 interactions |  |
|-------|------------|----------|----------------|------------|-------|------------|----------|----------------------|-------------|---------------|----------|----------|----------|---------------------------------|--|
| CHR   | SNP        | Location | gle locus P va | Gene       | CHR   | SNP        | Location | single locus P value | Gene        | MHC region    | Stage 1  | Stage 2  | Combined |                                 |  |
| 4     | rs4558821  | 1.57E+08 | 4.26E-01       | N/A        | 12    | rs2701623  | 1.12E+08 | 8.21E-01             | DTX1        | -             | 6.38E-07 | 2.58E-01 | 2.56E-06 | 9295                            |  |
| 3     | rs6782826  | 1.14E+08 | 3.68E-01       | N/A        | 16    | rs12448386 | 84705528 | 5.48E-01             | N/A         | -             | 6.38E-07 | 8.08E-01 | 5.17E-05 | 9296                            |  |
| 10    | rs1186361  | 1.29E+08 | 3.75E-01       | DOCK1      | 17    | rs9891348  | 50929373 | 1.18E-01             | N/A         | -             | 6.38E-07 | 7.10E-01 | 8.59E-05 | 9297                            |  |
| 6     | rs1893556  | 1.63E+08 | 5.41E-01       | PARK2      | 8     | rs218019   | 1.19E+08 | 1.93E-01             | N/A         | -             | 6.38E-07 | 1.61E-01 | 3.12E-03 | 9298                            |  |
| 10    | rs7098200  | 75769563 | 9.12E-01       | ADK        | 15    | rs1996142  | 95507602 | 8.77E-02             | N/A         | -             | 6.38E-07 | 3.03E-01 | 9.29E-06 | 9299                            |  |
| 8     | rs7001469  | 15841353 | 3.68E-01       | N/A        | 16    | rs7184872  | 27374838 | 4.93E-01             | GTF3C1      | -             | 6.38E-07 | 8.16E-01 | 5.50E-05 | 9300                            |  |
| 4     | rs4546199  | 1.64E+08 | 9.51E-01       | N/A        | 9     | rs3118561  | 1.37E+08 | 1.70E-01             | N/A         | -             | 6.38E-07 | N/A      | N/A      | 9301                            |  |
| 1     | rs7418187  | 56706132 | 9.31E-01       | N/A        | 11    | rs10789856 | 1.11E+08 | 8.70E-01             | PIH1D2      | -             | 6.39E-07 | 7.86E-01 | 6.36E-04 | 9302                            |  |
| 4     | rs10002827 | 1.45E+08 | 3.88E-01       | N/A        | 5     | rs9292871  | 43340159 | 9.92E-01             | HMGCS1      | -             | 6.39E-07 | 3.84E-01 | 2.18E-06 | 9303                            |  |
| 7     | rs7801539  | 1.17E+08 | 9.79E-01       | CTTNBP2    | 16    | rs1862453  | 27857577 | 4.07E-01             | GSGL1       | -             | 6.39E-07 | 1.19E-02 | 8.86E-08 | 9304                            |  |
| 7     | rs12701102 | 31522149 | 5.92E-01       | CCDC129    | 7     | rs675242   | 47556332 | 3.71E-01             | TNS3        | -             | 6.39E-07 | 2.46E-01 | 2.84E-03 | 9305                            |  |
| 4     | rs9992791  | 45217342 | 8.87E-01       | N/A        | 18    | rs558673   | 5898869  | 7.01E-01             | TMEM200C    | -             | 6.39E-07 | 3.27E-01 | 5.13E-04 | 9306                            |  |
| 6     | rs4495304  | 31188697 | 4.80E-02       | C6orf15    | 6     | rs1265074  | 31221193 | 9.61E-01             | TCF19       | MHC           | 6.39E-07 | 5.32E-02 | 5.59E-07 | 9307                            |  |
| 6     | rs4495304  | 31188697 | 4.80E-02       | C6orf15    | 6     | rs1265093  | 31215166 | 9.61E-01             | TCF19       | MHC           | 6.39E-07 | 5.32E-02 | 5.59E-07 | 9308                            |  |
| 6     | rs4495304  | 31188697 | 4.80E-02       | C6orf15    | 6     | rs1966     | 31215712 | 9.61E-01             | TCF19       | MHC           | 6.39E-07 | 5.32E-02 | 5.59E-07 | 9309                            |  |
| 6     | rs3130453  | 31232828 | 5.90E-01       | TCF19      | 6     | rs3130685  | 31314185 | 9.60E-02             | N/A         | MHC           | 6.39E-07 | 3.05E-01 | 1.11E-05 | 9310                            |  |
| 5     | rs3828699  | 1.26E+08 | 5.49E-01       | LMNB1      | 19    | rs3786669  | 55178751 | 3.89E-02             | SIGLEC16    | -             | 6.39E-07 | 6.34E-01 | 2.35E-05 | 9311                            |  |
| 1     | rs2024788  | 61659856 | 4.03E-01       | NFIA       | 4     | rs2720372  | 10226723 | 8.99E-01             | CLNK        | -             | 6.39E-07 | 5.66E-01 | 1.94E-04 | 9312                            |  |
| 12    | rs2673730  | 1.07E+08 | 5.03E-01       | N/A        | 17    | rs7223756  | 74794846 | 1.98E-01             | HRNPB3      | -             | 6.39E-07 | 8.92E-01 | 1.87E-04 | 9313                            |  |
| 12    | rs11045834 | 21232363 | 4.70E-02       | SLCO1B1    | 14    | rs181484   | 68427927 | 4.63E-01             | ACTN1       | -             | 6.39E-07 | 3.56E-02 | 1.53E-02 | 9314                            |  |
| 1     | rs2024788  | 61659856 | 4.03E-01       | NFIA       | 4     | rs978591   | 10227767 | 8.47E-01             | CLNK        | -             | 6.39E-07 | 5.66E-01 | 1.94E-04 | 9315                            |  |
| 4     | rs6814124  | 1.51E+08 | 4.99E-01       | N/A        | 9     | rs7861959  | 9141280  | 9.21E-01             | PTPRD       | -             | 6.39E-07 | 7.57E-01 | 2.62E-04 | 9316                            |  |
| 15    | rs12441340 | 22875057 | 2.86E-01       | SNORD116-3 | 18    | rs1550716  | 35493076 | 1.30E-03             | LOC647946   | -             | 6.39E-07 | 9.22E-02 | 1.68E-03 | 9317                            |  |
| 4     | rs11943009 | 1.34E+08 | 7.64E-01       | N/A        | 5     | rs1818350  | 90269689 | 2.09E-01             | GPR98       | -             | 6.39E-07 | 3.98E-01 | 1.25E-05 | 9318                            |  |
| 4     | rs11100040 | 1.57E+08 | 7.77E-01       | N/A        | 19    | rs4808526  | 16737099 | 6.66E-01             | NWD1        | -             | 6.39E-07 | 9.32E-01 | 1.30E-04 | 9319                            |  |
| 6     | rs2677818  | 1.34E+08 | 3.18E-01       | N/A        | 13    | rs9513249  | 96957705 | 6.69E-01             | N/A         | -             | 6.39E-07 | 9.57E-01 | 3.52E-04 | 9320                            |  |
| 6     | rs2677820  | 1.34E+08 | 3.18E-01       | N/A        | 13    | rs9513249  | 96957705 | 6.69E-01             | N/A         | -             | 6.39E-07 | 9.57E-01 | 3.52E-04 | 9321                            |  |
| 6     | rs2636601  | 1.34E+08 | 3.18E-01       | N/A        | 13    | rs9513249  | 96957705 | 6.69E-01             | N/A         | -             | 6.39E-07 | 9.57E-01 | 3.52E-04 | 9322                            |  |
| 16    | rs8061907  | 81574017 | 1.49E-01       | CDH13      | 22    | rs5763284  | 28229724 | 2.21E-01             | NEFH        | -             | 6.40E-07 | 1.83E-01 | 1.50E-03 | 9323                            |  |
| 4     | rs2614563  | 1.8E+08  | 1.82E-01       | N/A        | 8     | rs10957932 | 80439275 | 7.60E-01             | N/A         | -             | 6.40E-07 | 6.29E-01 | 2.36E-04 | 9324                            |  |
| 8     | rs17283426 | 1.06E+08 | 9.86E-01       | ZFPM2      | 11    | rs1249582  | 68522471 | 7.82E-01             | MRGPRD      | -             | 6.40E-07 | 7.29E-01 | 3.43E-05 | 9325                            |  |
| 10    | rs8578     | 98343411 | 7.82E-01       | TM9SF3     | 11    | rs12283068 | 98665712 | 8.47E-01             | CNTN5       | -             | 6.40E-07 | 9.62E-01 | 2.91E-04 | 9326                            |  |
| 4     | rs7661705  | 60539135 | 5.95E-01       | N/A        | 7     | rs2192017  | 1.22E+08 | 8.28E-01             | CADPS2      | -             | 6.40E-07 | 9.95E-01 | 2.00E-04 | 9327                            |  |
| 4     | rs2702386  | 1.8E+08  | 1.82E-01       | N/A        | 8     | rs10957932 | 80439275 | 7.60E-01             | N/A         | -             | 6.40E-07 | N/A      | N/A      | 9328                            |  |
| 15    | rs1780351  | 68239801 | 7.04E-01       | N/A        | 19    | rs2965261  | 58467498 | 9.88E-01             | ZNF677      | -             | 6.40E-07 | 3.65E-01 | 3.29E-04 | 9329                            |  |
| 4     | rs1478095  | 1.32E+08 | 6.79E-01       | N/A        | 8     | rs2114695  | 82661686 | 2.74E-01             | N/A         | -             | 6.40E-07 | N/A      | N/A      | 9330                            |  |
| 5     | rs10515518 | 1.42E+08 | 2.25E-01       | ARHGAP26   | 11    | rs11234891 | 86348490 | 5.82E-01             | FZD4        | -             | 6.40E-07 | 9.51E-01 | 5.57E-05 | 9331                            |  |
| 4     | rs13119453 | 1.86E+08 | 6.91E-01       | IRF2       | 11    | rs10736434 | 96986617 | 9.20E-01             | N/A         | -             | 6.40E-07 | 7.90E-02 | 5.66E-06 | 9332                            |  |
| 3     | rs333507   | 78923643 | 6.68E-02       | ROBO1      | 21    | rs2007397  | 41438062 | 1.27E-02             | C21orf130   | -             | 6.40E-07 | 7.97E-02 | 3.81E-07 | 9333                            |  |
| 3     | rs7650002  | 78929664 | 6.68E-02       | ROBO1      | 21    | rs2007397  | 41438062 | 1.27E-02             | C21orf130   | -             | 6.40E-07 | 7.97E-02 | 3.81E-07 | 9334                            |  |
| 3     | rs7623391  | 1.66E+08 | 3.36E-01       | N/A        | 4     | rs7697897  | 1.79E+08 | 1.72E-01             | LOC285501   | -             | 6.40E-07 | 5.32E-01 | 8.34E-06 | 9335                            |  |
| 1     | rs12120414 | 56615717 | 7.99E-01       | N/A        | 5     | rs7732252  | 26006423 | 3.76E-01             | N/A         | -             | 6.40E-07 | 1.29E-01 | 8.39E-04 | 9336                            |  |
| 1     | rs2317955  | 1.57E+08 | 5.40E-01       | N/A        | 2     | rs2114631  | 1.6E+08  | 5.19E-01             | LY75        | -             | 6.40E-07 | 3.67E-01 | 9.91E-04 | 9337                            |  |
| 6     | rs9380215  | 31157634 | 4.29E-02       | N/A        | 6     | rs3130534  | 31317024 | 3.50E-01             | N/A         | MHC           | 6.40E-07 | 1.21E-01 | 2.09E-06 | 9338                            |  |
| 6     | rs1076673  | 6572183  | 9.01E-01       | LOC285780  | 2     | rs6542834  | 98588371 | 2.67E-01             | INPP4A      | -             | 6.40E-07 | 4.85E-01 | 2.46E-04 | 9339                            |  |
| 5     | rs216535   | 1.11E+08 | 6.28E-01       | CAMK4      | 9     | rs4878368  | 27223367 | 1.26E-01             | NCRN/A00032 | -             | 6.40E-07 | 6.12E-01 | 1.21E-05 | 9340                            |  |
| 3     | rs7645792  | 1.42E+08 | 3.90E-01       | N/A        | 12    | rs10450    | 55270873 | 6.76E-01             | BAZZA2      | -             | 6.40E-07 | 2.15E-01 | 2.39E-06 | 9341                            |  |
| 1     | rs6702660  | 4923290  | 9.64E-01       | N/A        | 13    | rs1322812  | 36877365 | 1.71E-01             | N/A         | -             | 6.41E-07 | 5.53E-03 | 3.58E-02 | 9342                            |  |
| 4     | rs1500453  | 21902341 | 9.12E-01       | N/A        | 17    | rs10512514 | 62642338 | 1.53E-01             | HELZ        | -             | 6.41E-07 | 9.24E-03 | 2.02E-07 | 9343                            |  |
| 2     | rs833764   | 36047684 | 6.67E-01       | N/A        | 8     | rs3943615  | 54109850 | 2.27E-02             | N/A         | -             | 6.41E-07 | 1.88E-01 | 2.63E-06 | 9344                            |  |
| 2     | rs10931519 | 1.93E+08 | 5.31E-01       | TMEFF2     | 4     | rs2611074  | 66677216 | 7.19E-01             | N/A         | -             | 6.41E-07 | 3.98E-01 | 1.44E-05 | 9345                            |  |
| 1     | rs16845221 | 2.24E+08 | 5.89E-01       | N/A        | 3     | rs4857355  | 99448827 | 7.71E-01             | N/A         | -             | 6.41E-07 | 1.91E-01 | 6.94E-04 | 9346                            |  |
| 11    | rs2555141  | 6615883  | 6.85E-01       | DCHS1      | 16    | rs205355   | 28012030 | 9.04E-01             | XPO6        | -             | 6.41E-07 | 1.06E-01 | 2.41E-03 | 9347                            |  |
| 6     | rs9295638  | 25074668 | 3.49E-01       | N/A        | 1     | rs10914625 | 33071409 | 6.91E-01             | S100PBP     | MHC           | 6.41E-07 | 8.95E-01 | 4.61E-04 | 9348                            |  |
| 8     | rs1443930  | 1.09E+08 | 8.89E-01       | RSPO2      | 9     | rs4877161  | 81984071 | 5.30E-01             | N/A         | -             | 6.41E-07 | 6.20E-01 | 2.08E-04 | 9349                            |  |
| 5     | rs6450270  | 54287290 | 6.72E-01       | N/A        | 7     | rs10085496 | 9629332  | 2.00E-01             | PER4        | -             | 6.41E-07 | 9.57E-01 | 6.36E-05 | 9350                            |  |
| 2     | rs2033172  | 1.37E+08 | 3.96E-01       | N/A        | 8     | rs2447504  | 99195082 | 5.73E-01             | HRSP12      | -             | 6.41E-07 | 4.63E-01 | 1.79E-03 | 9351                            |  |
| 1     | rs2808019  | 2.19E+08 | 2.72E-02       | RAB3GAP2   | 8     | rs10504702 | 80373804 | 3.99E-02             | N/A         | -             | 6.41E-07 | 5.23E-01 | 1.46E-03 | 9352                            |  |
| 1     | rs2808019  | 2.19E+08 | 2.72E-02       | RAB3GAP2   | 8     | rs1460162  | 80389955 | 3.99E-02             | N/A         | -             | 6.41E-07 | 5.23E-01 | 1.46E-03 | 9353                            |  |
| 9     | rs10114562 | 1.16E+08 | 3.37E-01       | N/A        | 18    | rs9941427  | 62514281 | 3.52E-01             | N/A         | -             | 6.41E-07 | 5.76E-01 | 2.19E-05 | 9354                            |  |
| 8     | rs11261474 | 86481902 | 3.43E-01       | CA1        | 10    | rs2394375  | 68825642 | 3.00E-01             | CTNNA3      | -             | 6.42E-07 | 6.38E-01 | 1.76E-05 | 9355                            |  |
| 11    | rs601715   | 87461466 | 9.12E-02       | N/A        | 12    | rs1353360  | 69793828 | 6.32E-01             | TSPAN8      | -             | 6.42E-07 | 2.30E-01 | 4.13E-06 | 9356                            |  |
| 2     | rs10804016 | 1.88E+08 | 1.12E-01       | N/A        | 12    | rs7968902  | 64649337 | 5.94E-01             | HMGA2       | -             | 6.42E-07 | 3.29E-01 | 4.91E-04 | 9357                            |  |
| 3     | rs9790156  | 1.41E+08 | 4.24E-01       | CLSTN2     | 3     | rs1332694  | 1.6E+08  | 4.60E-01             | N/A         | -             | 6.42E-07 | 6.34E-01 | 4.35E-04 | 9358                            |  |
| 4     | rs10005964 | 77689324 | 7.97E-01       | SHROOM3    | 15    | rs1373470  | 84429110 | 5.00E-01             | N/A         | -             | 6.42E-07 | 6.63E-01 | 1.48E-05 | 9359                            |  |
| 12    | rs10859807 | 93886698 | 1.39E-01       | NDUFA12    | 20    | rs6017995  | 44770445 | 6.23E-01             | SLC2A10     | -             | 6.42E-07 | N/A      | N/A      | 9360                            |  |
| 5     | rs691360   | 18110132 | 6.01E-01       | N/A        | 13    | rs9316975  | 57661603 | 8.78E-01             | N/A         | -             | 6.42E-07 | 4.48E-02 | 1.14E-07 | 9361                            |  |
| 6     | rs10484679 | 1.48E+08 | 4.97E-01       | N/A        | 14    | rs12436002 | 32600921 | 8.34E-01             | NPAS3       | -             | 6.42E-07 | 9.66E-01 | 8.37E-05 | 9362                            |  |
| 4     | rs4690795  | 1.66E+08 | 1.12E-01       | N/A        | 13    | rs4771012  | 26188493 | 2.32E-01             | N/A         | -             | 6.42E-07 | 5.22E-01 | 6.85E-04 | 9363                            |  |
| 1     | rs1925032  | 1.56E+08 | 5.23E-01       | KIRREL     | 7     | rs453      | 1.12E+08 | 6.05E-01             | DOCK4       | -             | 6.42E-07 | 8.54E-01 | 1.10E-03 | 9364                            |  |
| 2     | rs4671178  | 54136997 | 9.21E-01       | N/A        | 5     | rs995360   | 1.13E+08 | 4.00E-01             | N/A         | -             | 6.42E-07 | 6.08E-01 | 3.04E-04 | 9365                            |  |
| 3     | rs1550158  | 14381627 | 5.19E-02       | N/A        | 5     | rs257258   | 97396129 | 8.06E-01             | N/A         | -             | 6.42E-07 | 9.97E-01 | 9.73E-   |                                 |  |

| SNP A |            |          |                 |          | SNP B |            |          |                      |          | Interaction P |          |          | Ranking  | Cluster in top 100 interactions |  |
|-------|------------|----------|-----------------|----------|-------|------------|----------|----------------------|----------|---------------|----------|----------|----------|---------------------------------|--|
| CHR   | SNP        | Location | gle locus P val | Gene     | CHR   | SNP        | Location | single locus P value | Gene     | MHC region    | Stage 1  | Stage 2  | Combined |                                 |  |
| 6     | rs9498131  | 1.49E+08 | 4.50E-01        | N/A      | 9     | rs2798060  | 92068763 | 9.20E-01             | N/A      | -             | 6.44E-07 | 6.56E-01 | 1.49E-04 | 9407                            |  |
| 11    | rs790343   | 83282554 | 3.77E-02        | DLG2     | 18    | rs587742   | 63687584 | 7.16E-01             | N/A      | -             | 6.44E-07 | 6.88E-01 | 8.34E-06 | 9408                            |  |
| 12    | rs2731032  | 43763341 | 5.52E-01        | RACGAP1P | 17    | rs11652075 | 75793488 | 7.82E-01             | CARD14   | -             | 6.44E-07 | 9.03E-01 | 5.22E-05 | 9409                            |  |
| 3     | rs208436   | 66954191 | 9.87E-01        | N/A      | 1     | rs12408956 | 41424539 | 6.56E-01             | SCMH1    | -             | 6.44E-07 | N/A      | N/A      | 9410                            |  |
| 6     | rs10865655 | 70940116 | 2.58E-01        | N/A      | 20    | rs6070406  | 56292157 | 3.07E-01             | PPP4R1L  | -             | 6.45E-07 | 9.95E-01 | 5.47E-05 | 9411                            |  |
| 8     | rs2720770  | 3617832  | 2.50E-01        | CSMD1    | 21    | rs2254505  | 17006156 | 1.80E-01             | N/A      | -             | 6.45E-07 | 6.58E-01 | 1.14E-03 | 9412                            |  |
| 1     | rs10493113 | 42931097 | 6.74E-01        | YBX1     | 10    | rs2420801  | 92904402 | 7.74E-01             | NUDT9P1  | -             | 6.45E-07 | 7.15E-01 | 1.89E-05 | 9413                            |  |
| 3     | rs11918416 | 63480231 | 6.21E-01        | SYNPR    | 7     | rs6948429  | 89247424 | 9.77E-01             | N/A      | -             | 6.45E-07 | 3.30E-02 | 1.57E-07 | 9414                            |  |
| 6     | rs7762850  | 1.65E+08 | 6.55E-03        | N/A      | 15    | rs3848117  | 55923241 | 5.53E-01             | N/A      | -             | 6.45E-07 | 5.57E-01 | 8.13E-04 | 9415                            |  |
| 5     | rs465560   | 4321276  | 4.71E-01        | N/A      | 12    | rs4764755  | 99753004 | 8.38E-01             | ANO4     | -             | 6.45E-07 | 1.24E-01 | 8.85E-07 | 9416                            |  |
| 5     | rs32209    | 1.28E+08 | 4.32E-01        | FBN2     | 10    | rs4752305  | 1.21E+08 | 4.17E-01             | GRK5     | -             | 6.45E-07 | 8.17E-01 | 3.64E-04 | 9417                            |  |
| 5     | rs39937    | 1.28E+08 | 4.32E-01        | FBN2     | 10    | rs4752305  | 1.21E+08 | 4.17E-01             | GRK5     | -             | 6.45E-07 | 8.17E-01 | 3.64E-04 | 9418                            |  |
| 5     | rs7707487  | 1.29E+08 | 9.04E-01        | ADAMTS19 | 15    | rs2307449  | 87664932 | 4.79E-01             | FANCI    | -             | 6.45E-07 | N/A      | N/A      | 9419                            |  |
| 3     | rs13085838 | 64625627 | 3.84E-02        | ADAMTS9  | 16    | rs6497755  | 24694696 | 4.03E-01             | TNRC6A   | -             | 6.45E-07 | 3.26E-02 | 3.43E-07 | 9420                            |  |
| 12    | rs550434   | 71157865 | 4.27E-01        | TRHDE    | 16    | rs1797204  | 55779366 | 2.15E-01             | FAM192A  | -             | 6.45E-07 | 8.76E-01 | 9.45E-05 | 9421                            |  |
| 2     | rs4952404  | 40414134 | 1.51E-01        | SLC8A1   | 15    | rs2118784  | 49238477 | 9.91E-01             | N/A      | -             | 6.45E-07 | 7.28E-02 | 1.50E-06 | 9422                            |  |
| 3     | rs4855413  | 69683544 | 8.73E-01        | N/A      | 16    | rs8059582  | 12687941 | 9.97E-01             | CPPED1   | -             | 6.45E-07 | 3.90E-01 | 1.22E-05 | 9423                            |  |
| 13    | rs953937   | 89320971 | 6.27E-01        | N/A      | 14    | rs2998303  | 84071041 | 1.50E-01             | N/A      | -             | 6.45E-07 | 3.14E-02 | 2.57E-07 | 9424                            |  |
| 2     | rs7349387  | 1.41E+08 | 7.60E-01        | LRP1B    | 21    | rs1009123  | 39129666 | 4.85E-01             | ETS2     | -             | 6.45E-07 | 2.24E-01 | 3.05E-03 | 9425                            |  |
| 11    | rs905770   | 65913341 | 3.92E-01        | SLC29A2  | 11    | rs664499   | 75565334 | 3.38E-01             | WNT11    | -             | 6.45E-07 | 5.54E-01 | 5.89E-05 | 9426                            |  |
| 10    | rs2607840  | 87960202 | 3.48E-01        | GRID1    | 13    | rs9583760  | 89442220 | 8.24E-01             | N/A      | -             | 6.45E-07 | 7.28E-01 | 1.12E-04 | 9427                            |  |
| 6     | rs161070   | 1.44E+08 | 2.14E-01        | PEX3     | 2     | rs13408281 | 1.71E+08 | 6.09E-01             | UBR3     | -             | 6.45E-07 | 6.60E-01 | 9.13E-05 | 9428                            |  |
| 2     | rs6716242  | 94823140 | 2.70E-01        | ANKRD20B | 14    | rs1950967  | 93333889 | 4.16E-01             | PRIMA1   | -             | 6.45E-07 | 7.40E-01 | 3.35E-04 | 9429                            |  |
| 6     | rs12524492 | 1.23E+08 | 9.39E-01        | PKIB     | 4     | rs3899492  | 1.81E+08 | 9.31E-01             | N/A      | -             | 6.45E-07 | 9.83E-01 | 6.84E-05 | 9430                            |  |
| 6     | rs7743671  | 1.23E+08 | 9.39E-01        | PKIB     | 4     | rs3899492  | 1.81E+08 | 9.31E-01             | N/A      | -             | 6.45E-07 | 9.83E-01 | 6.84E-05 | 9431                            |  |
| 9     | rs7860062  | 84736837 | 8.07E-01        | N/A      | 9     | rs12685781 | 91801450 | 5.89E-01             | N/A      | -             | 6.45E-07 | 1.06E-01 | 2.81E-06 | 9432                            |  |
| 9     | rs1327999  | 14542236 | 3.07E-01        | N/A      | 19    | rs2109069  | 4670443  | 4.31E-01             | PPP9     | -             | 6.45E-07 | 5.08E-01 | 2.85E-04 | 9433                            |  |
| 10    | rs1831474  | 20076086 | 7.38E-01        | N/A      | 17    | rs442548   | 71884974 | 9.68E-01             | UBE2O    | -             | 6.45E-07 | 6.53E-01 | 4.78E-04 | 9434                            |  |
| 3     | rs3856913  | 1.89E+08 | 7.12E-01        | N/A      | 22    | rs13055225 | 26149250 | 1.13E-01             | N/A      | -             | 6.46E-07 | 2.86E-01 | 8.37E-04 | 9435                            |  |
| 3     | rs7614825  | 1.89E+08 | 7.12E-01        | N/A      | 22    | rs13055225 | 26149250 | 1.13E-01             | N/A      | -             | 6.46E-07 | 2.86E-01 | 8.37E-04 | 9436                            |  |
| 18    | rs9964724  | 33413122 | 1.07E-01        | BRUNOL4  | 19    | rs12232877 | 24095263 | 4.11E-01             | ZNF254   | -             | 6.46E-07 | 6.55E-01 | 2.16E-03 | 9437                            |  |
| 7     | rs12706912 | 80090231 | 2.59E-01        | CD36     | 13    | rs9316153  | 45185022 | 8.65E-01             | SPERT    | -             | 6.46E-07 | 8.83E-01 | 2.14E-05 | 9438                            |  |
| 7     | rs17519442 | 11638659 | 1.37E-01        | THSD7A   | 8     | rs4738265  | 73606130 | 6.59E-01             | KCNB2    | -             | 6.46E-07 | 8.98E-01 | 5.03E-05 | 9439                            |  |
| 14    | rs4272953  | 48540230 | 9.05E-01        | N/A      | 16    | rs930743   | 79273633 | 5.97E-01             | CDYL2    | -             | 6.46E-07 | 2.84E-01 | 3.69E-06 | 9440                            |  |
| 6     | rs1873249  | 34161402 | 4.37E-01        | GRM4     | 8     | rs7463093  | 94001877 | 9.87E-01             | N/A      | MHC           | 6.46E-07 | 3.40E-01 | 5.68E-06 | 9441                            |  |
| 11    | rs1058678  | 62117613 | 6.87E-01        | EML3     | 15    | rs11633651 | 12512160 | 2.07E-01             | N/A      | -             | 6.46E-07 | N/A      | N/A      | 9442                            |  |
| 2     | rs2001427  | 22951846 | 4.97E-01        | N/A      | 10    | rs1997974  | 83243624 | 3.19E-01             | N/A      | -             | 6.46E-07 | N/A      | N/A      | 9443                            |  |
| 2     | rs2311552  | 1.12E+08 | 3.74E-01        | N/A      | 11    | rs11823466 | 23578823 | 5.32E-01             | N/A      | -             | 6.46E-07 | 3.91E-01 | 1.11E-03 | 9444                            |  |
| 11    | rs3751084  | 67540854 | 4.51E-01        | UNC93B1  | 15    | rs11631211 | 23412204 | 8.68E-01             | N/A      | -             | 6.46E-07 | 8.86E-01 | 1.07E-04 | 9445                            |  |
| 4     | rs2323262  | 21753534 | 1.58E-01        | N/A      | 9     | rs7034424  | 88764722 | 6.56E-01             | GAS1     | -             | 6.46E-07 | 4.87E-01 | 7.83E-04 | 9446                            |  |
| 5     | rs1600178  | 51894999 | 9.08E-01        | N/A      | 11    | rs2625510  | 83418247 | 6.12E-02             | DLG2     | -             | 6.46E-07 | 5.36E-01 | 5.49E-04 | 9447                            |  |
| 9     | rs7045243  | 86024539 | 1.01E-01        | N/A      | 13    | rs6490697  | 21577011 | 1.52E-02             | N/A      | -             | 6.46E-07 | 9.10E-01 | 1.45E-04 | 9448                            |  |
| 18    | rs3745013  | 2905219  | 4.57E-01        | EMILIN2  | 20    | rs6015003  | 55465368 | 6.77E-01             | N/A      | -             | 6.46E-07 | N/A      | N/A      | 9449                            |  |
| 15    | rs507736   | 27504337 | 3.34E-02        | FAM189A1 | 20    | rs4814966  | 2022922  | 4.53E-01             | STK35    | -             | 6.46E-07 | 7.03E-01 | 1.29E-04 | 9450                            |  |
| 7     | rs6463699  | 7516181  | 2.02E-01        | COL28A1  | 10    | rs2184352  | 1.22E+08 | 6.00E-01             | N/A      | -             | 6.46E-07 | 2.33E-01 | 8.95E-06 | 9451                            |  |
| 3     | rs6845     | 1.86E+08 | 8.15E-01        | PSMD2    | 14    | rs2295136  | 88004455 | 1.52E-01             | PTPN21   | -             | 6.46E-07 | 9.26E-01 | 2.99E-05 | 9452                            |  |
| 3     | rs3770725  | 64668269 | 2.88E-01        | N/A      | 3     | rs826385   | 24162088 | 3.25E-01             | THR3     | -             | 6.46E-07 | 4.53E-01 | 9.12E-06 | 9453                            |  |
| 4     | rs2702383  | 1.8E+08  | 3.58E-01        | N/A      | 9     | rs10984491 | 1.21E+08 | 8.71E-02             | DBC1     | -             | 6.46E-07 | 5.89E-01 | 1.39E-05 | 9454                            |  |
| 4     | rs6820131  | 23835016 | 1.96E-01        | N/A      | 15    | rs4337270  | 84343916 | 2.04E-01             | N/A      | -             | 6.46E-07 | 5.16E-01 | 4.44E-04 | 9455                            |  |
| 3     | rs1161149  | 8462491  | 3.62E-01        | N/A      | 13    | rs3015345  | 1.05E+08 | 7.02E-01             | N/A      | -             | 6.47E-07 | 9.68E-01 | 1.17E-04 | 9456                            |  |
| 9     | rs1360523  | 25489528 | 7.55E-01        | N/A      | 16    | rs899305   | 7140564  | 2.91E-01             | A2BP1    | -             | 6.47E-07 | 2.17E-03 | 1.52E-08 | 9457                            |  |
| 1     | rs4651010  | 1.77E+08 | 9.70E-01        | N/A      | 9     | rs2245644  | 76514071 | 4.30E-01             | TRPM6    | -             | 6.47E-07 | N/A      | N/A      | 9458                            |  |
| 6     | rs1856269  | 1.46E+08 | 9.10E-02        | N/A      | 7     | rs6967748  | 45105688 | 1.27E-01             | NACAD    | -             | 6.47E-07 | 8.58E-01 | 7.31E-05 | 9459                            |  |
| 8     | rs270065   | 3273722  | 3.89E-01        | CSMD1    | 22    | rs761419   | 46324898 | 1.70E-01             | N/A      | -             | 6.47E-07 | 8.01E-01 | 1.83E-04 | 9460                            |  |
| 1     | rs7522521  | 81651526 | 3.22E-01        | N/A      | 2     | rs7575607  | 31493959 | 3.12E-01             | XDH      | -             | 6.47E-07 | 3.46E-01 | 1.61E-05 | 9461                            |  |
| 1     | rs16825336 | 1735586  | 6.09E-01        | GNB1     | 5     | rs2278662  | 1.79E+08 | 2.77E-01             | RASGEF1C | -             | 6.47E-07 | 5.75E-01 | 2.47E-04 | 9462                            |  |
| 3     | rs10865655 | 70940116 | 2.58E-01        | N/A      | 20    | rs6128300  | 56294445 | 5.34E-01             | PPP4R1L  | -             | 6.47E-07 | 7.37E-01 | 8.51E-05 | 9463                            |  |
| 3     | rs10865655 | 70940116 | 2.58E-01        | N/A      | 20    | rs6128302  | 56299786 | 5.34E-01             | RAB22A   | -             | 6.47E-07 | 7.37E-01 | 8.51E-05 | 9464                            |  |
| 2     | rs10191556 | 2.42E+08 | 2.87E-01        | THAP4    | 4     | rs7665811  | 76852349 | 6.59E-01             | USO1     | -             | 6.47E-07 | 2.72E-01 | 1.09E-05 | 9465                            |  |
| 3     | rs12638861 | 56818068 | 8.98E-01        | ARHGEF3  | 9     | rs1535753  | 85094880 | 1.39E-01             | FRMD3    | -             | 6.47E-07 | 9.76E-01 | 3.36E-04 | 9466                            |  |
| 6     | rs879882   | 31247431 | 7.61E-01        | TCF19    | 6     | rs9368675  | 31380136 | 7.91E-01             | N/A      | MHC           | 6.47E-07 | 4.97E-02 | 6.47E-07 | 9467                            |  |
| 19    | rs1824794  | 22881436 | 2.70E-01        | N/A      | 21    | rs2836749  | 39209108 | 5.72E-01             | N/A      | -             | 6.47E-07 | 3.18E-01 | 7.05E-06 | 9468                            |  |
| 11    | rs4556569  | 87116245 | 2.68E-01        | N/A      | 14    | rs12882561 | 40546007 | 7.05E-01             | N/A      | -             | 6.47E-07 | 8.34E-01 | 3.54E-05 | 9469                            |  |
| 9     | rs10810285 | 14881670 | 3.19E-01        | FREM1    | 17    | rs317345   | 29208355 | 2.10E-01             | ACCN1    | -             | 6.48E-07 | 4.94E-01 | 1.05E-03 | 9470                            |  |
| 13    | rs6490720  | 21780871 | 5.41E-01        | N/A      | 13    | rs17069892 | 77919317 | 2.91E-01             | N/A      | -             | 6.48E-07 | 6.16E-01 | 3.11E-05 | 9471                            |  |
| 5     | rs2112564  | 1.29E+08 | 2.09E-01        | N/A      | 9     | rs3920797  | 1206635  | 2.77E-01             | N/A      | -             | 6.48E-07 | N/A      | N/A      | 9472                            |  |
| 5     | rs10719    | 31437204 | 3.58E-01        | RNASEN   | 20    | rs6038995  | 7907777  | 3.98E-01             | TMX4     | -             | 6.48E-07 | 1.67E-01 | 1.64E-03 | 9473                            |  |
| 2     | rs1123997  | 1.05E+08 | 7.12E-01        | N/A      | 7     | rs7803999  | 48427272 | 8.62E-04             | ABCA13   | -             | 6.48E-07 | 8.50E-01 | 2.51E-04 | 9474                            |  |
| 1     | rs12126587 | 18350856 | 1.88E-01        | IGSF21   | 16    | rs12051478 | 20871819 | 1.53E-01             | DN/AH3   | -             | 6.48E-07 | 7.44E-01 | 9.61E-05 | 9475                            |  |
| 1     | rs12126587 | 18350856 | 1.88E-01        | IGSF21   | 16    | rs3743696  | 20882570 | 1.53E-01             | DN/AH3   | -             | 6.48E-07 | 7.44E-01 | 9.61E-05 | 9476                            |  |
| 1     | rs9727014  | 18348774 | 1.88E-01        | IGSF21   | 16    | rs12051478 | 20871819 | 1.53E-01             | DN/AH3   | -             | 6.48E-07 | 7.44E-01 | 9.61E-05 | 9477                            |  |
| 1     | rs9727014  | 18348774 | 1.88E-01        | IGSF21   | 16    | rs3743696  | 20882570 | 1.53E-01             | DN/AH3   | -             | 6.48E-07 | 7.44E-01 | 9.61E-05 | 9478                            |  |
| 6     |            |          |                 |          |       |            |          |                      |          |               |          |          |          |                                 |  |

| SNP A |            |          |                 |          | SNP B |            |          |                    |          | MHC region | Interaction P |          |          | Ranking | Cluster in top 100 interactions |
|-------|------------|----------|-----------------|----------|-------|------------|----------|--------------------|----------|------------|---------------|----------|----------|---------|---------------------------------|
| CHR   | SNP        | Location | gle locus P val | Gene     | CHR   | SNP        | Location | single locus P val | Gene     |            | Stage 1       | Stage 2  | Combined |         |                                 |
| 10    | rs11259537 | 15275960 | 5.69E-01        | FAM171A1 | 11    | rs1939469  | 75913868 | 3.64E-01           | C11orf30 | -          | 6.50E-07      | 1.72E-01 | 1.07E-03 | 9519    |                                 |
| 2     | rs1250226  | 2.16E+08 | 5.73E-01        | N/A      | 3     | rs6797616  | 81313323 | 7.54E-02           | N/A      | -          | 6.50E-07      | 7.59E-02 | 6.48E-07 | 9520    |                                 |
| 7     | rs3808035  | 1.03E+08 | 8.82E-03        | RELN     | 22    | rs4822832  | 25717402 | 1.00E-02           | N/A      | -          | 6.50E-07      | 3.30E-01 | 4.41E-03 | 9521    |                                 |
| 4     | rs1352573  | 1.19E+08 | 1.53E-01        | N/A      | 17    | rs180750   | 12303225 | 3.31E-01           | N/A      | -          | 6.50E-07      | 7.92E-01 | 3.01E-05 | 9522    |                                 |
| 11    | rs12273302 | 19208280 | 8.61E-01        | E2F8     | 16    | rs4780486  | 9532033  | 1.05E-03           | N/A      | -          | 6.50E-07      | 7.98E-01 | 2.18E-04 | 9523    |                                 |
| 2     | rs13395807 | 2.29E+08 | 4.86E-01        | N/A      | 11    | rs836132   | 34411767 | 6.81E-01           | ELF5     | -          | 6.50E-07      | 6.66E-02 | 2.90E-07 | 9524    |                                 |
| 1     | rs2296452  | 78199071 | 8.61E-01        | N/A      | 5     | rs6860842  | 7775106  | 6.76E-01           | SCAMP1   | -          | 6.50E-07      | 5.48E-01 | 1.91E-04 | 9525    |                                 |
| 6     | rs6906699  | 19952334 | 1.52E-01        | ID4      | 13    | rs9524516  | 93940835 | 9.12E-01           | DCT      | -          | 6.50E-07      | 9.30E-01 | 5.05E-05 | 9526    |                                 |
| 9     | rs11142066 | 89849415 | 6.41E-01        | N/A      | 12    | rs7975710  | 26425333 | 8.50E-01           | ITPR2    | -          | 6.50E-07      | 5.11E-02 | 8.74E-07 | 9527    |                                 |
| 1     | rs1338078  | 1.12E+08 | 7.84E-01        | N/A      | 3     | rs1865160  | 510673   | 5.17E-01           | N/A      | -          | 6.50E-07      | 9.78E-01 | 8.66E-05 | 9528    |                                 |
| 17    | rs10459889 | 66453810 | 1.59E-01        | N/A      | 19    | rs408687   | 22022963 | 6.99E-01           | ZNF257   | -          | 6.50E-07      | 3.67E-01 | 6.75E-04 | 9529    |                                 |
| 17    | rs10459889 | 66453810 | 1.59E-01        | N/A      | 19    | rs409835   | 22022511 | 6.99E-01           | ZNF257   | -          | 6.50E-07      | 3.67E-01 | 6.75E-04 | 9530    |                                 |
| 17    | rs10459889 | 66453810 | 1.59E-01        | N/A      | 19    | rs411020   | 22022942 | 6.99E-01           | ZNF257   | -          | 6.50E-07      | 3.67E-01 | 6.75E-04 | 9531    |                                 |
| 2     | rs12614708 | 2242173  | 8.59E-01        | N/A      | 3     | rs13080704 | 1.1E+08  | 2.95E-01           | TRAT1    | -          | 6.50E-07      | 5.57E-01 | 2.54E-05 | 9532    |                                 |
| 4     | rs17021755 | 1.48E+08 | 9.94E-02        | POU4F2   | 20    | rs6125931  | 48228820 | 2.44E-01           | CEBPB    | -          | 6.51E-07      | 4.44E-02 | 3.35E-03 | 9533    |                                 |
| 14    | rs17124954 | 88440873 | 6.70E-01        | N/A      | 16    | rs10500558 | 70109022 | 7.80E-02           | CHST4    | -          | 6.51E-07      | 6.55E-02 | 3.83E-03 | 9534    |                                 |
| 14    | rs17124954 | 88440873 | 6.70E-01        | N/A      | 16    | rs7202662  | 70102989 | 7.80E-02           | CHST4    | -          | 6.51E-07      | 6.55E-02 | 3.83E-03 | 9535    |                                 |
| 1     | rs10493425 | 67782715 | 4.50E-01        | N/A      | 12    | rs1471997  | 47009862 | 8.07E-01           | N/A      | -          | 6.51E-07      | 7.78E-02 | 4.05E-03 | 9536    |                                 |
| 2     | rs7584904  | 1.05E+08 | 8.67E-01        | N/A      | 20    | rs2423967  | 15529484 | 1.83E-01           | MACROD2  | -          | 6.51E-07      | 3.25E-01 | 3.58E-05 | 9537    |                                 |
| 6     | rs2246016  | 93321027 | 4.12E-01        | N/A      | 2     | rs10173035 | 1.68E+08 | 3.08E-02           | N/A      | -          | 6.51E-07      | 5.20E-01 | 1.02E-03 | 9538    |                                 |
| 7     | rs1637837  | 1.48E+08 | 9.21E-01        | CNTNAP2  | 10    | rs7901838  | 66928346 | 6.98E-01           | N/A      | -          | 6.51E-07      | 6.16E-01 | 1.66E-04 | 9539    |                                 |
| 7     | rs1637837  | 1.48E+08 | 9.21E-01        | CNTNAP2  | 10    | rs10822576 | 66950838 | 6.98E-01           | N/A      | -          | 6.51E-07      | 6.62E-01 | 1.41E-04 | 9540    |                                 |
| 7     | rs1637837  | 1.48E+08 | 9.21E-01        | CNTNAP2  | 10    | rs7099767  | 66952127 | 6.98E-01           | N/A      | -          | 6.51E-07      | 6.62E-01 | 1.41E-04 | 9541    |                                 |
| 10    | rs9423582  | 5291811  | 5.86E-01        | N/A      | 20    | rs6068993  | 52874904 | 1.22E-01           | N/A      | -          | 6.51E-07      | 9.17E-01 | 8.04E-05 | 9542    |                                 |
| 1     | rs807247   | 25993456 | 5.33E-01        | MAN1C1   | 11    | rs10791545 | 1.01E+08 | 4.47E-01           | KIAA1377 | -          | 6.51E-07      | 3.47E-01 | 2.87E-05 | 9543    |                                 |
| 1     | rs807247   | 25993456 | 5.33E-01        | MAN1C1   | 11    | rs2119734  | 1.01E+08 | 4.47E-01           | KIAA1377 | -          | 6.51E-07      | 3.47E-01 | 2.87E-05 | 9544    |                                 |
| 14    | rs7160845  | 76107877 | 1.14E-02        | N/A      | 16    | rs415595   | 11271193 | 5.49E-01           | PRM3     | -          | 6.51E-07      | 2.86E-01 | 9.54E-05 | 9545    |                                 |
| 2     | rs2578007  | 1.83E+08 | 4.69E-01        | N/A      | 12    | rs1846035  | 82545653 | 9.72E-01           | N/A      | -          | 6.51E-07      | 5.33E-01 | 4.68E-05 | 9546    |                                 |
| 5     | rs983280   | 59480894 | 4.55E-01        | PDE4D    | 17    | rs3785902  | 65619713 | 5.26E-02           | KCNJ16   | -          | 6.51E-07      | 5.69E-01 | 1.49E-04 | 9547    |                                 |
| 3     | rs769798   | 3750107  | 3.64E-01        | N/A      | 16    | rs280858   | 75155263 | 4.92E-01           | N/A      | -          | 6.51E-07      | 7.70E-01 | 5.23E-05 | 9548    |                                 |
| 3     | rs12629639 | 1.55E+08 | 2.97E-01        | N/A      | 13    | rs1431270  | 1.09E+08 | 1.03E-01           | MYO16    | -          | 6.51E-07      | 9.29E-01 | 1.71E-04 | 9549    |                                 |
| 5     | rs10045947 | 1.79E+08 | 1.93E-01        | RNF130   | 9     | rs1888171  | 27677159 | 6.23E-01           | N/A      | -          | 6.52E-07      | 6.54E-01 | 9.46E-05 | 9550    |                                 |
| 11    | rs1790158  | 74858897 | 1.10E-01        | GDPD5    | 16    | rs7198127  | 79758130 | 9.90E-01           | PKD1L2   | -          | 6.52E-07      | 9.67E-01 | 3.29E-04 | 9551    |                                 |
| 16    | rs1465350  | 54235278 | 7.60E-01        | N/A      | 17    | rs8069706  | 23346964 | 2.84E-01           | N/A      | -          | 6.52E-07      | 7.03E-01 | 4.35E-05 | 9552    |                                 |
| 11    | rs475688   | 64120867 | 8.12E-01        | NRXN2    | 12    | rs1470803  | 43281923 | 3.70E-01           | NELL2    | -          | 6.52E-07      | 2.03E-01 | 1.42E-03 | 9553    |                                 |
| 4     | rs11131397 | 63282780 | 8.65E-01        | N/A      | 12    | rs11063667 | 5403395  | 8.03E-03           | NTF3     | -          | 6.52E-07      | 2.22E-01 | 6.94E-06 | 9554    |                                 |
| 10    | rs1143870  | 9333647  | 6.47E-01        | N/A      | 20    | rs6021231  | 49525694 | 8.13E-01           | NFATC2   | -          | 6.52E-07      | 1.68E-02 | 9.24E-03 | 9555    |                                 |
| 7     | rs150607   | 28534544 | 2.11E-01        | CREB5    | 17    | rs4790738  | 4915716  | 3.88E-01           | ZFP3     | -          | 6.52E-07      | 5.65E-01 | 3.92E-05 | 9556    |                                 |
| 3     | rs9857030  | 4611821  | 8.94E-01        | ITPR1    | 4     | rs2911890  | 37472706 | 6.97E-01           | N/A      | -          | 6.52E-07      | 6.12E-01 | 8.61E-05 | 9557    |                                 |
| 2     | rs908733   | 1.82E+08 | 1.44E-01        | N/A      | 14    | rs1288354  | 96638001 | 7.85E-01           | N/A      | -          | 6.52E-07      | 9.89E-01 | 1.38E-04 | 9558    |                                 |
| 1     | rs7514281  | 1.88E+08 | 4.90E-01        | N/A      | 4     | rs10017985 | 1.89E+08 | 4.97E-01           | N/A      | -          | 6.52E-07      | 2.64E-01 | 9.57E-04 | 9559    |                                 |
| 2     | rs7575596  | 2.35E+08 | 2.28E-01        | N/A      | 11    | rs6578604  | 5299185  | 2.00E-01           | OR51B2   | -          | 6.52E-07      | 2.72E-01 | 1.72E-03 | 9560    |                                 |
| 2     | rs10189097 | 1.76E+08 | 1.01E-01        | N/A      | 8     | rs916551   | 17998578 | 1.48E-02           | ASAHI    | -          | 6.52E-07      | 8.61E-01 | 4.56E-04 | 9561    |                                 |
| 2     | rs13397558 | 1.76E+08 | 1.01E-01        | N/A      | 8     | rs916551   | 17998578 | 1.48E-02           | ASAHI    | -          | 6.52E-07      | 8.61E-01 | 4.56E-04 | 9562    |                                 |
| 2     | rs2551214  | 2335000  | 2.21E-01        | N/A      | 3     | rs12497335 | 45198645 | 1.89E-01           | N/A      | -          | 6.52E-07      | 9.63E-01 | 1.94E-04 | 9563    |                                 |
| 12    | rs11047574 | 24736444 | 7.80E-01        | N/A      | 13    | rs7999638  | 89274415 | 8.79E-01           | N/A      | -          | 6.52E-07      | 4.30E-01 | 5.47E-04 | 9564    |                                 |
| 3     | rs2918214  | 1.17E+08 | 7.48E-01        | LSAMP    | 17    | rs1380796  | 74696514 | 5.44E-01           | HRNB3    | -          | 6.52E-07      | 9.09E-01 | 5.14E-04 | 9565    |                                 |
| 2     | rs7559746  | 2.27E+08 | 8.46E-01        | N/A      | 13    | rs2036717  | 75645031 | 4.28E-01           | N/A      | -          | 6.52E-07      | 2.23E-01 | 2.19E-03 | 9566    |                                 |
| 8     | rs12679072 | 57728418 | 8.23E-01        | N/A      | 15    | rs2243932  | 59770219 | 5.70E-01           | N/A      | -          | 6.53E-07      | 9.89E-01 | 6.59E-05 | 9567    |                                 |
| 3     | rs7625682  | 29466227 | 4.31E-01        | N/A      | 11    | rs4468331  | 3121988  | 3.10E-01           | OSBPL5   | -          | 6.53E-07      | 2.18E-02 | 2.01E-07 | 9568    |                                 |
| 6     | rs1951358  | 1.09E+08 | 2.23E-01        | ARMC2    | 2     | rs2032953  | 2.32E+08 | 3.56E-01           | N/A      | -          | 6.53E-07      | 1.58E-01 | 6.53E-06 | 9569    |                                 |
| 1     | rs12089317 | 22625714 | 4.12E-01        | N/A      | 11    | rs6589006  | 1.08E+08 | 4.79E-01           | ACAT1    | -          | 6.53E-07      | 7.63E-01 | 1.63E-04 | 9570    |                                 |
| 4     | rs7698564  | 48157924 | 7.79E-01        | N/A      | 16    | rs7192553  | 81674884 | 9.75E-02           | CDH13    | -          | 6.53E-07      | 1.86E-01 | 2.65E-06 | 9571    |                                 |
| 8     | rs10504444 | 70527562 | 4.00E-01        | SULF1    | 9     | rs10125663 | 1.17E+08 | 2.63E-01           | 1-Dec    | -          | 6.53E-07      | 2.78E-01 | 5.12E-04 | 9572    |                                 |
| 11    | rs7109004  | 20849339 | 6.14E-02        | NELL1    | 12    | rs1512735  | 84240895 | 9.74E-01           | N/A      | -          | 6.53E-07      | 3.99E-01 | 1.03E-03 | 9573    |                                 |
| 1     | rs11208380 | 64429559 | 8.74E-02        | ROR1     | 15    | rs2594935  | 25858633 | 1.48E-01           | OCA2     | -          | 6.53E-07      | 4.20E-01 | 1.41E-05 | 9574    |                                 |
| 5     | rs4869417  | 92570216 | 6.44E-01        | N/A      | 17    | rs12450242 | 74960720 | 6.25E-01           | HRNB3    | -          | 6.53E-07      | 7.27E-01 | 1.80E-05 | 9575    |                                 |
| 2     | rs6724135  | 1.15E+08 | 3.24E-01        | N/A      | 12    | rs7134402  | 12988594 | 3.10E-01           | GPRC5D   | -          | 6.53E-07      | 7.59E-01 | 5.19E-04 | 9576    |                                 |
| 4     | rs4235040  | 82762778 | 1.30E-01        | N/A      | 11    | rs4586138  | 11955605 | 4.04E-02           | USP47    | -          | 6.53E-07      | N/A      | N/A      | 9577    |                                 |
| 6     | rs3213541  | 1.01E+08 | 3.35E-01        | SIM1     | 7     | rs886505   | 8752582  | 9.14E-01           | NXPH1    | -          | 6.53E-07      | 1.10E-01 | 2.91E-06 | 9578    |                                 |
| 14    | rs12147701 | 77599568 | 5.40E-01        | N/A      | 18    | rs3888654  | 3587864  | 4.11E-01           | DLGAP1   | -          | 6.53E-07      | 2.87E-01 | 9.48E-04 | 9579    |                                 |
| 6     | rs1062470  | 31192414 | 4.89E-01        | C6orf15  | 6     | rs7750269  | 31379136 | 8.58E-01           | N/A      | MHC        | 6.53E-07      | 6.20E-01 | 8.30E-04 | 9580    |                                 |
| 2     | rs4671787  | 67261861 | 9.61E-01        | N/A      | 12    | rs762785   | 75783898 | 1.00E-02           | ZDHHC17  | -          | 6.53E-07      | 6.06E-01 | 9.84E-04 | 9581    |                                 |
| 2     | rs4671787  | 67261861 | 9.61E-01        | N/A      | 12    | rs762786   | 75783639 | 1.00E-02           | ZDHHC17  | -          | 6.53E-07      | 6.06E-01 | 9.84E-04 | 9582    |                                 |
| 7     | rs12669548 | 14492752 | 9.82E-01        | DGKB     | 11    | rs1482219  | 97912888 | 6.17E-01           | N/A      | -          | 6.53E-07      | 2.11E-01 | 7.22E-04 | 9583    |                                 |
| 3     | rs2110084  | 45358858 | 4.25E-01        | N/A      | 12    | rs7304462  | 1.14E+08 | 8.14E-01           | N/A      | -          | 6.53E-07      | 7.26E-01 | 2.10E-04 | 9584    |                                 |
| 11    | rs7930843  | 1.09E+08 | 4.26E-01        | ZC3H12C  | 20    | rs6093346  | 38500329 | 7.60E-01           | N/A      | -          | 6.54E-07      | 8.47E-01 | 3.89E-05 | 9585    |                                 |
| 2     | rs1064767  | 2.42E+08 | 4.36E-01        | HDLBP    | 11    | rs1899506  | 27098252 | 5.50E-02           | BBOX1    | -          | 6.54E-07      | 2.74E-01 | 2.94E-03 | 9586    |                                 |
| 6     | rs4324759  | 1.66E+08 | 1.04E-01        | C6orf118 | 5     | rs10079374 | 17863895 | 8.53E-01           | N/A      | -          | 6.54E-07      | 7.52E-01 | 4.55E-05 | 9587    |                                 |
| 2     | rs10170117 | 1.62E+08 | 6.43E-01        | N/A      | 20    | rs2104351  | 14869539 | 1.03E-01           | MACROD2  | -          | 6.54E-07      | 2.12E-01 | 3.99E-03 | 9588    |                                 |
| 3     | rs2218746  | 28991443 | 3.16E-01        | N/A      | 15    | rs1568657  | 81517183 | 7.10E-01           | BTBD1    | -          | 6.54E-07      | 2.38E-01 | 9.70E-04 | 9589    |                                 |
| 4     | rs2980089  | 4318199  | 8.86E-01        | LYAR     | 5     | rs7734808  | 1.21E+08 | 7.9                |          |            |               |          |          |         |                                 |

| SNP A |            |          |                 |          | SNP B |            |          |                    |           | MHC region | Interaction P |          |          | Ranking | Cluster in top 100 interactions |
|-------|------------|----------|-----------------|----------|-------|------------|----------|--------------------|-----------|------------|---------------|----------|----------|---------|---------------------------------|
| CHR   | SNP        | Location | gle locus P val | Gene     | CHR   | SNP        | Location | single locus P val | Gene      |            | Stage 1       | Stage 2  | Combined |         |                                 |
| 2     | rs1125383  | 1.05E+08 | 1.42E-01        | N/A      | 9     | rs2181029  | 27316904 | 1.05E-01           | MOBK2B    | -          | 6.56E-07      | 5.40E-01 | 5.06E-05 | 9631    |                                 |
| 6     | rs969931   | 29602876 | 1.59E-01        | N/A      | 10    | rs2180563  | 33430188 | 4.72E-01           | N/A       | MHC        | 6.56E-07      | 9.99E-01 | 5.65E-05 | 9632    |                                 |
| 8     | rs579096   | 20846271 | 9.14E-01        | N/A      | 9     | rs1081511  | 4901930  | 7.16E-01           | N/A       | -          | 6.56E-07      | N/A      | N/A      | 9633    |                                 |
| 11    | rs669834   | 79043373 | 8.37E-01        | N/A      | 18    | rs4798335  | 5270622  | 5.42E-01           | ZFP161    | -          | 6.56E-07      | 7.50E-02 | 8.85E-03 | 9634    |                                 |
| 6     | rs9359457  | 81904850 | 7.73E-01        | N/A      | 4     | rs1473221  | 60466092 | 1.78E-01           | N/A       | -          | 6.56E-07      | 2.68E-01 | 1.14E-03 | 9635    |                                 |
| 6     | rs7749819  | 55442364 | 1.00E+00        | HMGCLL1  | 10    | rs12414556 | 1.27E+08 | 5.51E-01           | N/A       | -          | 6.56E-07      | 6.15E-01 | 1.33E-04 | 9636    |                                 |
| 6     | rs9475303  | 55445021 | 1.00E+00        | HMGCLL1  | 10    | rs12414556 | 1.27E+08 | 5.51E-01           | N/A       | -          | 6.56E-07      | 6.15E-01 | 1.33E-04 | 9637    |                                 |
| 4     | rs4566922  | 8816712  | 6.24E-01        | N/A      | 8     | rs7826624  | 35586829 | 6.46E-01           | UNC5D     | -          | 6.56E-07      | 7.77E-01 | 7.48E-05 | 9638    |                                 |
| 1     | rs12711521 | 11013503 | 2.32E-01        | MASP2    | 14    | rs1467526  | 51172942 | 9.42E-01           | FRMD6     | -          | 6.57E-07      | 5.83E-01 | 1.76E-05 | 9639    |                                 |
| 8     | rs3735830  | 74020431 | 9.67E-01        | KCNB2    | 10    | rs11238605 | 43453997 | 8.09E-01           | ZNF32     | -          | 6.57E-07      | 7.67E-01 | 2.68E-05 | 9640    |                                 |
| 10    | rs9299535  | 77786105 | 7.01E-01        | C10orf11 | 11    | rs670342   | 78329325 | 9.25E-01           | ODZ4      | -          | 6.57E-07      | N/A      | N/A      | 9641    |                                 |
| 3     | rs11714758 | 21973157 | 3.62E-01        | N/A      | 11    | rs16930396 | 14598458 | 1.37E-01           | PSMA1     | -          | 6.57E-07      | 1.01E-01 | 2.65E-03 | 9642    |                                 |
| 1     | rs1556795  | 97751905 | 4.03E-01        | DPYD     | 8     | rs925030   | 25298518 | 7.28E-01           | DOCK5     | -          | 6.57E-07      | 1.98E-01 | 5.84E-06 | 9643    |                                 |
| 2     | rs6435267  | 2.06E+08 | 8.74E-01        | PARD3B   | 8     | rs7016966  | 14118719 | 4.01E-01           | SGCZ      | -          | 6.57E-07      | 1.55E-01 | 1.40E-06 | 9644    |                                 |
| 1     | rs1193233  | 7472713  | 8.95E-01        | CAMTA1   | 14    | rs4981673  | 27958722 | 6.99E-01           | N/A       | -          | 6.57E-07      | 1.53E-01 | 5.03E-06 | 9645    |                                 |
| 4     | rs236754   | 1.03E+08 | 8.32E-01        | N/A      | 10    | rs2399659  | 11278201 | 2.44E-01           | CUGBP2    | -          | 6.57E-07      | 8.53E-01 | 1.95E-04 | 9646    |                                 |
| 6     | rs1555064  | 1.64E+08 | 2.00E-01        | PACRG    | 14    | rs2242531  | 21067948 | 7.35E-01           | MTETL3    | -          | 6.57E-07      | 3.09E-01 | 5.78E-06 | 9647    |                                 |
| 8     | rs10503617 | 18474753 | 6.82E-01        | PSD3     | 10    | rs871748   | 5741801  | 2.59E-01           | ASB13     | -          | 6.57E-07      | 4.98E-01 | 3.82E-04 | 9648    |                                 |
| 6     | rs270398   | 7710839  | 2.09E-01        | BMP6     | 17    | rs4536508  | 61813793 | 7.85E-02           | PRKCA     | -          | 6.57E-07      | 1.86E-01 | 5.41E-06 | 9649    |                                 |
| 6     | rs270398   | 7710839  | 2.09E-01        | BMP6     | 17    | rs7211558  | 61812941 | 7.85E-02           | PRKCA     | -          | 6.57E-07      | 1.86E-01 | 5.41E-06 | 9650    |                                 |
| 3     | rs263412   | 10217671 | 7.61E-01        | IRAK2    | 10    | rs2889780  | 50231196 | 6.87E-01           | DRGX      | -          | 6.57E-07      | 3.27E-01 | 2.56E-04 | 9651    |                                 |
| 2     | rs6730963  | 1.33E+08 | 9.52E-01        | NCKAP5   | 17    | rs8069937  | 40564152 | 6.46E-01           | ACBD4     | -          | 6.57E-07      | 8.66E-01 | 2.07E-04 | 9652    |                                 |
| 2     | rs3820926  | 2.28E+08 | 4.59E-01        | COL4A4   | 17    | rs4239112  | 10096227 | 3.32E-01           | N/A       | -          | 6.57E-07      | N/A      | N/A      | 9653    |                                 |
| 6     | rs847848   | 35014146 | 5.60E-01        | ANKS1A   | 9     | rs287572   | 31994713 | 1.35E-01           | N/A       | MHC        | 6.57E-07      | 1.18E-01 | 1.78E-03 | 9654    |                                 |
| 6     | rs847848   | 35014146 | 5.60E-01        | ANKS1A   | 9     | rs287573   | 31994571 | 1.35E-01           | N/A       | MHC        | 6.57E-07      | 1.18E-01 | 1.78E-03 | 9655    |                                 |
| 6     | rs847848   | 35014146 | 5.60E-01        | ANKS1A   | 9     | rs407791   | 32012207 | 1.35E-01           | N/A       | MHC        | 6.57E-07      | 1.18E-01 | 1.78E-03 | 9656    |                                 |
| 2     | rs13000806 | 1.93E+08 | 3.10E-01        | TMEFF2   | 20    | rs2210578  | 10084402 | 6.71E-01           | N/A       | -          | 6.57E-07      | 1.28E-01 | 3.07E-06 | 9657    |                                 |
| 5     | rs7716678  | 1.5E+08  | 3.02E-01        | NDST1    | 13    | rs9575933  | 35808743 | 9.12E-02           | SPG20     | -          | 6.57E-07      | 5.94E-01 | 1.56E-05 | 9658    |                                 |
| 6     | rs847848   | 35014146 | 5.60E-01        | ANKS1A   | 9     | rs453809   | 32006697 | 1.35E-01           | N/A       | MHC        | 6.57E-07      | N/A      | N/A      | 9659    |                                 |
| 2     | rs11688532 | 1.28E+08 | 1.78E-01        | N/A      | 7     | rs1431534  | 14430643 | 3.87E-01           | DGKB      | -          | 6.58E-07      | 5.71E-01 | 5.25E-04 | 9660    |                                 |
| 3     | rs7619876  | 1.14E+08 | 3.65E-01        | N/A      | 19    | rs12462307 | 63476544 | 3.48E-01           | ZNF544    | -          | 6.58E-07      | 5.86E-01 | 2.42E-04 | 9661    |                                 |
| 2     | rs13024316 | 1.42E+08 | 9.16E-01        | LRP1B    | 7     | rs1027898  | 52066867 | 8.99E-01           | N/A       | -          | 6.58E-07      | 2.89E-01 | 2.83E-03 | 9662    |                                 |
| 4     | rs13108458 | 32614391 | 4.50E-02        | N/A      | 20    | rs6037513  | 3171225  | 7.60E-01           | C20orf194 | -          | 6.58E-07      | 7.10E-01 | 3.44E-04 | 9663    |                                 |
| 12    | rs825090   | 1.01E+08 | 3.89E-01        | MYBPC1   | 14    | rs17114437 | 43352817 | 5.00E-02           | N/A       | -          | 6.58E-07      | 2.33E-01 | 8.24E-06 | 9664    |                                 |
| 4     | rs7440592  | 66137501 | 6.34E-02        | EPHA5    | 8     | rs16908681 | 1.39E+08 | 6.46E-02           | FAM135B   | -          | 6.58E-07      | 3.69E-01 | 2.70E-06 | 9665    |                                 |
| 4     | rs4624709  | 66152139 | 5.53E-02        | EPHA5    | 8     | rs16908681 | 1.39E+08 | 6.46E-02           | FAM135B   | -          | 6.58E-07      | 4.44E-01 | 4.15E-06 | 9666    |                                 |
| 3     | rs1828652  | 1.47E+08 | 9.13E-01        | N/A      | 11    | rs10837475 | 6056383  | 2.70E-01           | N/A       | -          | 6.58E-07      | 6.83E-01 | 3.37E-05 | 9667    |                                 |
| 4     | rs17033388 | 1.57E+08 | 7.07E-01        | GUCY1A3  | 5     | rs2045990  | 1.01E+08 | 9.39E-01           | N/A       | -          | 6.58E-07      | 7.44E-01 | 2.35E-04 | 9668    |                                 |
| 5     | rs4704506  | 77690583 | 5.04E-01        | SCAMP1   | 11    | rs7126049  | 73061030 | 5.43E-01           | RAB6A     | -          | 6.58E-07      | 9.01E-01 | 1.77E-04 | 9669    |                                 |
| 11    | rs12576767 | 1.17E+08 | 1.90E-01        | N/A      | 22    | rs5997110  | 25366505 | 5.47E-01           | CRYBA4    | -          | 6.58E-07      | 8.63E-01 | 1.93E-04 | 9670    |                                 |
| 8     | rs4368963  | 42463395 | 9.89E-01        | SLC20A2  | 10    | rs7922447  | 1.02E+08 | 5.04E-01           | DNMBP     | -          | 6.58E-07      | 6.43E-01 | 1.05E-04 | 9671    |                                 |
| 7     | rs10488536 | 92719598 | 1.26E-01        | CCDC132  | 13    | rs9541313  | 67737117 | 4.18E-01           | N/A       | -          | 6.58E-07      | 3.20E-02 | 2.87E-07 | 9672    |                                 |
| 2     | rs10170117 | 1.62E+08 | 6.43E-01        | N/A      | 20    | rs4299400  | 14869606 | 9.44E-02           | MACROD2   | -          | 6.58E-07      | 2.12E-01 | 4.26E-03 | 9673    |                                 |
| 3     | rs843790   | 1.54E+08 | 7.31E-02        | N/A      | 8     | rs328300   | 38463656 | 1.14E-01           | N/A       | -          | 6.58E-07      | 2.44E-01 | 1.22E-05 | 9674    |                                 |
| 10    | rs2395023  | 71126317 | 4.01E-01        | N/A      | 18    | rs3902020  | 48065150 | 7.07E-01           | N/A       | -          | 6.58E-07      | 1.99E-01 | 2.79E-03 | 9675    |                                 |
| 6     | rs4541741  | 41772010 | 1.22E-01        | TFEF     | 11    | rs9326286  | 1.26E+08 | 2.37E-01           | KIRREL3   | -          | 6.58E-07      | 4.64E-01 | 2.60E-04 | 9676    |                                 |
| 2     | rs10171698 | 79011181 | 2.64E-01        | N/A      | 11    | rs6591324  | 55941921 | 3.16E-01           | OR8U8     | -          | 6.58E-07      | 5.35E-01 | 3.24E-04 | 9677    |                                 |
| 2     | rs12618471 | 1.87E+08 | 6.59E-01        | N/A      | 3     | rs7433389  | 18249117 | 7.25E-01           | N/A       | -          | 6.59E-07      | 4.90E-01 | 4.48E-05 | 9678    |                                 |
| 1     | rs4970610  | 38865078 | 1.51E-01        | N/A      | 9     | rs7858089  | 28399300 | 3.65E-01           | LINGO2    | -          | 6.59E-07      | 4.64E-01 | 2.04E-04 | 9679    |                                 |
| 9     | rs2273766  | 76887451 | 2.03E-01        | OSTF1    | 18    | rs1523232  | 24230826 | 1.07E-01           | N/A       | -          | 6.59E-07      | 8.69E-01 | 1.85E-05 | 9680    |                                 |
| 9     | rs1392521  | 8369313  | 2.54E-01        | PTPRD    | 18    | rs2156025  | 66885986 | 3.67E-01           | N/A       | -          | 6.59E-07      | 1.32E-01 | 7.12E-03 | 9681    |                                 |
| 3     | rs16852880 | 1.7E+08  | 5.05E-01        | N/A      | 12    | rs3941119  | 48591274 | 8.09E-01           | LOC283332 | -          | 6.59E-07      | 7.66E-03 | 7.88E-03 | 9682    |                                 |
| 3     | rs6801861  | 3674454  | 1.60E-01        | N/A      | 21    | rs2833047  | 31025370 | 6.76E-01           | KRTAP21-3 | -          | 6.59E-07      | 6.91E-02 | 3.02E-07 | 9683    |                                 |
| 3     | rs6801861  | 3674454  | 1.60E-01        | N/A      | 21    | rs2833073  | 31040071 | 6.76E-01           | KRTAP21-2 | -          | 6.59E-07      | 6.91E-02 | 3.02E-07 | 9684    |                                 |
| 6     | rs12206684 | 18761302 | 6.54E-01        | N/A      | 2     | rs1522664  | 1.48E+08 | 3.11E-01           | N/A       | -          | 6.59E-07      | 7.57E-02 | 3.10E-06 | 9685    |                                 |
| 3     | rs154961   | 6491544  | 4.25E-01        | N/A      | 12    | rs6488326  | 10819446 | 3.01E-01           | N/A       | -          | 6.59E-07      | 5.87E-01 | 9.49E-05 | 9686    |                                 |
| 5     | rs10041997 | 1.2E+08  | 5.18E-01        | N/A      | 20    | rs527643   | 47639993 | 9.65E-01           | N/A       | -          | 6.59E-07      | 9.28E-01 | 9.09E-05 | 9687    |                                 |
| 2     | rs4850931  | 1E+08    | 8.67E-01        | CHST10   | 3     | rs11916012 | 1.88E+08 | 1.30E-01           | N/A       | -          | 6.60E-07      | 8.51E-02 | 7.36E-07 | 9688    |                                 |
| 2     | rs1861168  | 49037518 | 6.54E-01        | FSHR     | 5     | rs10462946 | 1.64E+08 | 4.71E-01           | N/A       | -          | 6.60E-07      | 4.06E-01 | 1.63E-04 | 9689    |                                 |
| 5     | rs6594929  | 1.15E+08 | 9.45E-01        | LVRN     | 13    | rs12863583 | 26426322 | 4.69E-01           | N/A       | -          | 6.60E-07      | 4.11E-01 | 7.07E-06 | 9690    |                                 |
| 9     | rs649891   | 10420602 | 8.75E-01        | PTPRD    | 12    | rs1497176  | 40519549 | 9.86E-01           | N/A       | -          | 6.60E-07      | 5.91E-01 | 9.19E-04 | 9691    |                                 |
| 4     | rs7687468  | 58807916 | 4.05E-01        | N/A      | 9     | rs10868806 | 72143304 | 3.29E-01           | SMC5      | -          | 6.60E-07      | 5.76E-01 | 1.11E-05 | 9692    |                                 |
| 11    | rs10891914 | 1.15E+08 | 8.34E-01        | N/A      | 13    | rs7989892  | 45528642 | 1.85E-01           | CPB2      | -          | 6.60E-07      | 6.55E-01 | 5.22E-04 | 9693    |                                 |
| 2     | rs6740698  | 54577245 | 8.28E-01        | SPTBN1   | 11    | rs7110039  | 1.22E+08 | 2.27E-03           | C11orf63  | -          | 6.60E-07      | 9.00E-01 | 7.04E-05 | 9694    |                                 |
| 6     | rs17058986 | 99537921 | 6.53E-01        | N/A      | 11    | rs17432191 | 1.04E+08 | 6.53E-01           | N/A       | -          | 6.60E-07      | 2.81E-01 | 3.82E-04 | 9695    |                                 |
| 1     | rs2686228  | 2.39E+08 | 9.03E-01        | RGST     | 2     | rs1574392  | 2.28E+08 | 4.68E-01           | COL4A4    | -          | 6.60E-07      | 3.64E-01 | 5.94E-04 | 9696    |                                 |
| 1     | rs10753374 | 4188905  | 3.76E-01        | N/A      | 9     | rs2781102  | 1.22E+08 | 7.99E-01           | N/A       | -          | 6.60E-07      | 7.61E-01 | 1.79E-05 | 9697    |                                 |
| 13    | rs10047744 | 29310337 | 4.56E-01        | N/A      | 16    | rs1790076  | 79065556 | 6.67E-01           | N/A       | -          | 6.60E-07      | 2.09E-01 | 3.62E-03 | 9698    |                                 |
| 7     | rs10486378 | 19952661 | 3.53E-02        | N/A      | 20    | rs1182484  | 57777748 | 4.12E-01           | PHACTR3   | -          | 6.60E-07      | 6.09E-01 | 1.10E-05 | 9699    |                                 |
| 15    | rs2034247  | 78399486 | 8.59E-01        | N/A      | 19    | rs8104890  | 57211420 | 3.57E-01           | ZNF614    | -          | 6.60E-07      | 6.95E-01 | 2.44E-05 | 9700    |                                 |
| 9     | rs10739593 | 1.23E+08 | 9.58E-01        | GSN      | 13    | rs928021   | 69604009 | 4.49E-01           | ATXN8OS   | -          | 6.60E-07      | 7.24E-01 | 2.87E-04 | 9701    |                                 |
| 7     | rs10256379 | 1.41E+08 | 4.49E-01        | N/A      | 14    | rs8015016  | 95192161 | 2.86E-02           | TCL6      | -          | 6.60E-07</    |          |          |         |                                 |

| SNP A |            |          |                |              | SNP B |           |          |                     |           | Interaction P |          |          | Ranking  | Cluster in top 100 interactions |  |
|-------|------------|----------|----------------|--------------|-------|-----------|----------|---------------------|-----------|---------------|----------|----------|----------|---------------------------------|--|
| CHR   | SNP        | Location | gle locus P va | Gene         | CHR   | SNP       | Location | single locus P valu | Gene      | MHC region    | Stage 1  | Stage 2  | Combined |                                 |  |
| 14    | rs4899673  | 77236707 | 4.21E-01       | C14orf156    | 18    | s12326516 | 19139126 | 4.70E-01            | C18orf45  | -             | 6.63E-07 | 9.75E-01 | 4.44E-05 | 9743                            |  |
| 13    | rs7991698  | 20012824 | 2.48E-01       | CRYL1        | 15    | rs1453854 | 46016892 | 9.06E-01            | N/A       | -             | 6.63E-07 | 3.88E-01 | 1.07E-05 | 9744                            |  |
| 1     | rs10489729 | 1.83E+08 | 1.79E-01       | C1orf21      | 16    | rs8050676 | 22723494 | 2.20E-01            | MIR548D2  | -             | 6.63E-07 | 1.32E-02 | 1.54E-02 | 9745                            |  |
| 1     | rs845451   | 2.08E+08 | 9.45E-01       | SERTAD4      | 12    | rs7967556 | 4974791  | 9.59E-01            | N/A       | -             | 6.63E-07 | 6.51E-01 | 3.77E-04 | 9746                            |  |
| 2     | rs3754944  | 2.31E+08 | 9.01E-01       | SP100        | 7     | s12703951 | 1.47E+08 | 9.39E-01            | CNTNAP2   | -             | 6.63E-07 | N/A      | N/A      | 9747                            |  |
| 2     | rs3771790  | 74924075 | 5.95E-01       | HK2          | 10    | s12572131 | 50185252 | 3.48E-01            | C10orf71  | -             | 6.63E-07 | 3.02E-01 | 2.60E-04 | 9748                            |  |
| 1     | rs1727098  | 39761914 | 6.66E-02       | BMP8A        | 12    | rs4767311 | 1.14E+08 | 2.88E-01            | N/A       | -             | 6.63E-07 | 8.27E-01 | 3.19E-04 | 9749                            |  |
| 6     | rs7741438  | 5668117  | 4.89E-01       | FARS2        | 4     | rs7693492 | 1.4E+08  | 1.12E-01            | N/A       | -             | 6.63E-07 | 3.25E-01 | 1.96E-05 | 9750                            |  |
| 2     | rs2194408  | 53397123 | 7.00E-01       | N/A          | 12    | s12579294 | 3160206  | 5.99E-01            | TSPAN9    | -             | 6.63E-07 | 7.50E-01 | 1.20E-04 | 9751                            |  |
| 12    | rs7298815  | 5189961  | 9.89E-01       | N/A          | 17    | rs8080666 | 59840612 | 8.26E-01            | N/A       | -             | 6.63E-07 | 8.74E-01 | 1.28E-04 | 9752                            |  |
| 10    | rs4933211  | 93358143 | 4.39E-01       | LOC100188947 | 12    | s10847721 | 1.28E+08 | 7.76E-01            | GLT1D1    | -             | 6.63E-07 | 7.33E-01 | 1.02E-04 | 9753                            |  |
| 18    | rs2033104  | 34351851 | 2.33E-01       | N/A          | 20    | s16995991 | 9439492  | 6.09E-03            | C20orf103 | -             | 6.63E-07 | 7.35E-01 | 6.73E-05 | 9754                            |  |
| 9     | rs7869846  | 1767728  | 3.44E-01       | N/A          | 14    | rs1376889 | 45987357 | 6.90E-01            | N/A       | -             | 6.63E-07 | 1.39E-01 | 3.06E-06 | 9755                            |  |
| 8     | rs7833351  | 95251354 | 6.61E-01       | CDH17        | 17    | rs940009  | 22924910 | 3.78E-01            | KSR1      | -             | 6.63E-07 | 5.19E-01 | 2.63E-05 | 9756                            |  |
| 10    | rs6560722  | 1322488  | 5.23E-01       | ADARB2       | 11    | rs6833213 | 1.25E+08 | 8.67E-02            | PUS3      | -             | 6.63E-07 | 8.17E-01 | 1.21E-04 | 9757                            |  |
| 5     | rs2057831  | 1.38E+08 | 8.16E-01       | CDC23        | 22    | rs137916  | 48833840 | 2.20E-01            | TLL8      | -             | 6.63E-07 | 8.78E-01 | 4.56E-05 | 9758                            |  |
| 5     | rs2864     | 1.38E+08 | 8.16E-01       | BRD8         | 22    | rs137916  | 48833840 | 2.20E-01            | TLL8      | -             | 6.63E-07 | 8.78E-01 | 4.56E-05 | 9759                            |  |
| 3     | rs9874803  | 1.14E+08 | 4.57E-01       | C3orf17      | 11    | s1090221E | 733813   | 9.12E-02            | EPS8L2    | -             | 6.64E-07 | 2.77E-01 | 5.41E-06 | 9760                            |  |
| 9     | rs10817970 | 1.19E+08 | 3.37E-01       | ASTN2        | 16    | rs3751688 | 88161940 | 3.42E-02            | CPNE7     | -             | 6.64E-07 | 3.98E-01 | 5.12E-06 | 9761                            |  |
| 1     | rs1252071  | 1.76E+08 | 6.75E-01       | N/A          | 3     | s17038905 | 1442145  | 4.92E-01            | N/A       | -             | 6.64E-07 | 5.02E-01 | 2.09E-05 | 9762                            |  |
| 3     | rs1566548  | 1.6E+08  | 6.22E-01       | N/A          | 7     | rs702479  | 12770960 | 2.89E-01            | N/A       | -             | 6.64E-07 | 5.50E-01 | 7.16E-04 | 9763                            |  |
| 2     | rs1052431  | 1.03E+08 | 8.08E-01       | SLC9A2       | 8     | s10100405 | 88960987 | 6.43E-01            | DCAF4L2   | -             | 6.64E-07 | 5.41E-01 | 3.09E-05 | 9764                            |  |
| 7     | rs2287126  | 37223275 | 7.85E-01       | ELMO1        | 13    | rs6492677 | 93200111 | 6.38E-01            | GPC6      | -             | 6.64E-07 | 9.32E-02 | 1.18E-06 | 9765                            |  |
| 7     | rs2287126  | 37223275 | 7.85E-01       | ELMO1        | 13    | rs7993501 | 93196981 | 6.38E-01            | GPC6      | -             | 6.64E-07 | 9.32E-02 | 1.18E-06 | 9766                            |  |
| 15    | rs10518725 | 51603044 | 2.99E-01       | WDR72        | 20    | rs6022965 | 52154471 | 3.77E-01            | N/A       | -             | 6.64E-07 | 8.01E-02 | 1.66E-06 | 9767                            |  |
| 7     | rs354052   | 1.49E+08 | 7.76E-01       | ZNF767       | 10    | rs7076844 | 19866244 | 5.90E-01            | N/A       | -             | 6.64E-07 | 3.72E-01 | 2.41E-03 | 9768                            |  |
| 2     | rs4852033  | 2.4E+08  | 2.71E-01       | N/A          | 17    | rs9911645 | 10632225 | 2.46E-01            | N/A       | -             | 6.64E-07 | 8.14E-01 | 7.61E-05 | 9769                            |  |
| 4     | rs6856910  | 1.86E+08 | 4.53E-01       | IRF2         | 5     | rs6871988 | 1.53E+08 | 2.98E-01            | N/A       | -             | 6.64E-07 | 9.52E-01 | 9.79E-05 | 9770                            |  |
| 18    | rs7236709  | 43780889 | 9.98E-01       | N/A          | 21    | rs524662  | 30506260 | 5.33E-01            | CLDN8     | -             | 6.64E-07 | 3.40E-01 | 6.46E-05 | 9771                            |  |
| 3     | rs698675   | 1.42E+08 | 5.25E-01       | TRIM42       | 5     | s11745195 | 26242976 | 4.92E-01            | N/A       | -             | 6.64E-07 | 8.05E-01 | 1.98E-05 | 9772                            |  |
| 11    | rs16933    | 44921948 | 8.37E-02       | TP53I11      | 12    | s11063005 | 4109753  | 2.93E-01            | N/A       | -             | 6.64E-07 | 5.14E-01 | 1.56E-05 | 9773                            |  |
| 2     | rs1807143  | 76040607 | 1.38E-01       | N/A          | 10    | rs1219732 | 1.26E+08 | 2.28E-01            | CPXM2     | -             | 6.64E-07 | 6.67E-01 | 4.60E-05 | 9774                            |  |
| 5     | rs12656216 | 36196425 | 3.71E-01       | SKP2         | 10    | rs650058  | 95368537 | 8.84E-01            | PDE6C     | -             | 6.65E-07 | 2.02E-02 | 1.24E-07 | 9775                            |  |
| 5     | rs298026   | 58976968 | 4.11E-01       | PDE4D        | 8     | s10956485 | 1.31E+08 | 5.98E-01            | N/A       | -             | 6.65E-07 | 3.29E-01 | 2.21E-05 | 9776                            |  |
| 6     | rs9484143  | 1.39E+08 | 7.03E-01       | KIAA1244     | 2     | rs7569111 | 2.36E+08 | 1.62E-01            | AGAP1     | -             | 6.65E-07 | 5.62E-01 | 5.04E-05 | 9777                            |  |
| 1     | rs1103577  | 1.57E+08 | 2.54E-01       | N/A          | 13    | rs112938  | 84307597 | 6.89E-02            | N/A       | -             | 6.65E-07 | N/A      | N/A      | 9778                            |  |
| 1     | rs1103577  | 1.57E+08 | 2.54E-01       | N/A          | 13    | rs1358044 | 84316787 | 6.89E-02            | N/A       | -             | 6.65E-07 | N/A      | N/A      | 9779                            |  |
| 16    | rs9925768  | 83735148 | 7.15E-01       | N/A          | 17    | rs6501697 | 69677322 | 7.87E-01            | N/A       | -             | 6.65E-07 | 1.62E-01 | 5.83E-04 | 9780                            |  |
| 10    | rs4751691  | 1.21E+08 | 6.55E-01       | E1F3A        | 17    | rs7219850 | 15324395 | 3.55E-01            | CDRT4     | -             | 6.65E-07 | 2.60E-01 | 3.60E-06 | 9781                            |  |
| 1     | rs1620977  | 72501730 | 7.62E-01       | NEGR1        | 11    | rs2510877 | 1.2E+08  | 1.22E-01            | N/A       | -             | 6.65E-07 | 3.87E-01 | 2.81E-05 | 9782                            |  |
| 2     | rs12619205 | 66579371 | 1.00E-01       | MEIS1        | 15    | s12593813 | 65823906 | 9.76E-01            | MAP2K5    | -             | 6.65E-07 | 9.45E-01 | 8.68E-05 | 9783                            |  |
| 6     | rs1199389  | 8336115  | 7.69E-01       | N/A          | 17    | rs236597  | 65747520 | 2.25E-01            | N/A       | -             | 6.65E-07 | 1.15E-01 | 2.34E-03 | 9784                            |  |
| 6     | rs9459093  | 1.58E+08 | 4.97E-01       | SYNJ2        | 3     | rs7429855 | 74609855 | 2.42E-01            | CNTN3     | -             | 6.65E-07 | 1.26E-01 | 2.72E-07 | 9785                            |  |
| 5     | rs2286394  | 1.4E+08  | 9.27E-01       | WDR55        | 7     | rs4141213 | 19218681 | 3.08E-01            | N/A       | -             | 6.65E-07 | 6.74E-01 | 1.70E-05 | 9786                            |  |
| 1     | rs2296796  | 2.29E+08 | 1.34E-01       | COG2         | 11    | rs652024  | 81461531 | 3.08E-02            | N/A       | -             | 6.65E-07 | 4.55E-01 | 5.24E-04 | 9787                            |  |
| 5     | rs13185746 | 1.12E+08 | 5.16E-01       | N/A          | 16    | s1107451E | 9809913  | 3.73E-01            | GRIN2A    | -             | 6.65E-07 | 8.47E-01 | 1.07E-04 | 9788                            |  |
| 5     | rs10067709 | 1.12E+08 | 5.16E-01       | N/A          | 16    | s1107451E | 9809913  | 3.73E-01            | GRIN2A    | -             | 6.65E-07 | 8.89E-01 | 1.21E-04 | 9789                            |  |
| 5     | rs4866602  | 3742363  | 7.06E-01       | N/A          | 22    | rs2331112 | 24272670 | 8.95E-01            | ADRBK2    | -             | 6.65E-07 | 4.08E-01 | 5.13E-06 | 9790                            |  |
| 8     | rs1805867  | 91100250 | 3.99E-01       | DECRC1       | 15    | rs4775941 | 49447122 | 7.78E-01            | GLDN      | -             | 6.65E-07 | 4.46E-01 | 9.72E-05 | 9791                            |  |
| 1     | rs7536307  | 77730636 | 2.26E-01       | AK5          | 21    | rs2839641 | 43472790 | 9.99E-01            | CRYAA     | -             | 6.65E-07 | 7.34E-01 | 2.81E-04 | 9792                            |  |
| 2     | rs17016629 | 35506420 | 1.82E-01       | N/A          | 7     | rs2353354 | 1.38E+08 | 3.66E-01            | SVOP1     | -             | 6.65E-07 | 8.29E-01 | 2.46E-04 | 9793                            |  |
| 5     | rs10939975 | 62875449 | 4.76E-01       | N/A          | 21    | rs2238724 | 44677377 | 9.84E-01            | TRPM2     | -             | 6.66E-07 | 2.92E-01 | 6.90E-06 | 9794                            |  |
| 6     | rs1130656  | 1.61E+08 | 9.49E-01       | PLG          | 1     | rs2453200 | 2.42E+08 | 5.37E-01            | N/A       | -             | 6.66E-07 | 3.84E-01 | 3.27E-03 | 9795                            |  |
| 4     | rs11466640 | 38455298 | 4.92E-01       | TLR10        | 19    | rs2617640 | 58591685 | 7.17E-01            | ZNF525    | -             | 6.66E-07 | 9.19E-01 | 1.12E-04 | 9796                            |  |
| 6     | rs2235718  | 1552602  | 1.38E-01       | GMDS         | 1     | s11102213 | 1.09E+08 | 4.65E-01            | PRPF38B   | -             | 6.66E-07 | 7.77E-03 | 4.57E-08 | 9797                            |  |
| 4     | rs1519238  | 1.25E+08 | 7.80E-01       | N/A          | 9     | rs4745520 | 70821553 | 7.12E-01            | FXN       | -             | 6.66E-07 | 5.03E-01 | 1.85E-05 | 9798                            |  |
| 4     | rs1390264  | 20995345 | 6.57E-01       | KCNIP4       | 20    | rs6139011 | 3042175  | 2.03E-01            | UBOX5     | -             | 6.66E-07 | 2.02E-01 | 2.35E-03 | 9799                            |  |
| 1     | rs4394682  | 19710124 | 5.72E-01       | N/A          | 2     | rs1454382 | 52772433 | 7.99E-01            | N/A       | -             | 6.66E-07 | 9.59E-01 | 1.88E-04 | 9800                            |  |
| 11    | rs1944720  | 78988045 | 1.68E-01       | N/A          | 18    | rs3842993 | 64393252 | 2.79E-01            | N/A       | -             | 6.66E-07 | 2.91E-01 | 1.10E-03 | 9801                            |  |
| 17    | rs4795715  | 27966241 | 7.52E-01       | MYO1D        | 18    | rs8097986 | 46445557 | 7.03E-01            | MAPK4     | -             | 6.66E-07 | 5.73E-01 | 6.88E-04 | 9802                            |  |
| 6     | rs6454267  | 83097859 | 3.68E-01       | N/A          | 4     | rs2903472 | 12665619 | 2.99E-02            | N/A       | -             | 6.66E-07 | 1.39E-01 | 3.13E-03 | 9803                            |  |
| 12    | rs7300210  | 20615619 | 2.90E-01       | PDE3A        | 15    | s12593636 | 44460804 | 6.21E-02            | N/A       | -             | 6.66E-07 | 1.46E-01 | 4.15E-06 | 9804                            |  |
| 8     | rs6999653  | 434485   | 7.57E-01       | C8orf42      | 21    | rs6517254 | 35002160 | 2.86E-01            | CLIC6     | -             | 6.66E-07 | 2.59E-01 | 4.05E-06 | 9805                            |  |
| 9     | rs7031694  | 71412996 | 8.16E-01       | APBA1        | 10    | rs7904413 | 17655653 | 2.38E-01            | PTPLA     | -             | 6.66E-07 | 4.17E-01 | 1.05E-04 | 9806                            |  |
| 10    | rs2224865  | 85412834 | 9.12E-01       | N/A          | 14    | s1258761E | 20323006 | 7.23E-01            | FAM12B    | -             | 6.67E-07 | 2.10E-01 | 1.09E-05 | 9807                            |  |
| 4     | rs1513765  | 1.39E+08 | 1.21E-01       | N/A          | 15    | rs1992215 | 65205991 | 6.25E-01            | SMAD3     | -             | 6.67E-07 | 2.09E-01 | 1.52E-05 | 9808                            |  |
| 5     | rs2918285  | 1.49E+08 | 3.78E-01       | ABLM3        | 18    | rs3809950 | 65449850 | 1.94E-01            | DOK6      | -             | 6.67E-07 | 1.60E-01 | 3.45E-03 | 9809                            |  |
| 5     | rs4277904  | 1.49E+08 | 3.78E-01       | ABLM3        | 18    | rs3809950 | 65449850 | 1.94E-01            | DOK6      | -             | 6.67E-07 | 1.60E-01 | 3.45E-03 | 9810                            |  |
| 6     | rs110691   | 1.24E+08 | 8.60E-01       | NKAIN2       | 15    | rs2623468 | 37214957 | 1.63E-01            | N/A       | -             | 6.67E-07 | 1.10E-02 | 2.98E-08 | 9811                            |  |
| 4     | rs9312076  | 61933672 | 9.26E-01       | N/A          | 17    | rs4791235 | 60539518 | 5.54E-01            | N/A       | -             | 6.67E-07 | 6.43E-01 | 1.11E-05 | 9812                            |  |
| 1     | rs10489227 | 1.76E+08 | 2.67E-01       | N/A          | 7     | s10269431 | 11937854 | 6.48E-01            | N/A       | -             | 6.67E-07 | 7.48E-01 | 3.87E-04 | 9813                            |  |
| 1     | rs12038173 | 1.76E+08 | 2.67E-01       | N/A          | 7     | s10269431 | 11937854 | 6.48E-01            | N/A       | -             | 6.67E-07 | 7.48E-   |          |                                 |  |

| SNP A |            |          |                 |          | SNP B |            |          |                    |           | MHC region | Interaction P |          |          | Ranking | Cluster in top 100 interactions |
|-------|------------|----------|-----------------|----------|-------|------------|----------|--------------------|-----------|------------|---------------|----------|----------|---------|---------------------------------|
| CHR   | SNP        | Location | gle locus P val | Gene     | CHR   | SNP        | Location | single locus P val | Gene      |            | Stage 1       | Stage 2  | Combined |         |                                 |
| 2     | rs4500939  | 2.29E+08 | 8.48E-01        | SPHKAP   | 4     | rs1401910  | 56867735 | 9.49E-02           | KIAA1211  | -          | 6.69E-07      | 2.74E-02 | 2.99E-02 | 9855    |                                 |
| 3     | rs1917524  | 65535207 | 9.66E-01        | MAGI1    | 18    | rs2850463  | 31389109 | 9.82E-01           | N/A       | -          | 6.69E-07      | 8.64E-01 | 6.69E-05 | 9856    |                                 |
| 6     | rs9465831  | 20719905 | 7.22E-01        | CDKAL1   | 20    | rs713406   | 56389876 | 4.24E-01           | VAPB      | -          | 6.70E-07      | 4.16E-01 | 1.15E-03 | 9857    |                                 |
| 5     | rs246660   | 1.42E+08 | 3.22E-02        | ARHGAP26 | 18    | rs4131293  | 21026067 | 4.08E-01           | ZNF521    | -          | 6.70E-07      | 1.71E-01 | 1.25E-06 | 9858    |                                 |
| 6     | rs484406   | 92497627 | 7.78E-01        | N/A      | 11    | rs216486   | 16777742 | 4.09E-01           | PLEKHA7   | -          | 6.70E-07      | 9.66E-01 | 4.21E-04 | 9859    |                                 |
| 4     | rs469831   | 96185917 | 7.16E-01        | BMPR1B   | 15    | rs4779046  | 81139827 | 7.98E-01           | AP3B2     | -          | 6.70E-07      | 5.43E-01 | 2.03E-05 | 9860    |                                 |
| 1     | rs10493809 | 88353971 | 7.71E-01        | N/A      | 11    | rs4944992  | 74541928 | 5.21E-03           | SLCO2B1   | -          | 6.70E-07      | 3.26E-01 | 3.00E-04 | 9861    |                                 |
| 6     | rs794114   | 1.65E+08 | 5.41E-01        | N/A      | 2     | rs13387662 | 34016918 | 2.26E-01           | N/A       | -          | 6.70E-07      | 6.92E-01 | 2.46E-05 | 9862    |                                 |
| 10    | rs12217563 | 31781279 | 1.56E-02        | ZEB1     | 19    | rs2074552  | 2165057  | 1.08E-01           | DOT1L     | -          | 6.70E-07      | 9.85E-01 | 2.25E-04 | 9863    |                                 |
| 6     | rs9383633  | 1.5E+08  | 4.17E-01        | RAET1K   | 9     | rs13293034 | 1.27E+08 | 4.15E-01           | MAPKAP1   | -          | 6.70E-07      | 1.71E-01 | 8.04E-04 | 9864    |                                 |
| 2     | rs11680124 | 71656459 | 7.96E-01        | DYSF     | 3     | rs1530734  | 54171506 | 3.02E-01           | CACNA2D3  | -          | 6.70E-07      | 5.14E-01 | 3.01E-05 | 9865    |                                 |
| 1     | rs4847386  | 93193495 | 6.66E-01        | FAM69A   | 18    | rs749309   | 64573576 | 6.57E-02           | CCDC102B  | -          | 6.70E-07      | 8.93E-01 | 1.56E-04 | 9866    |                                 |
| 6     | rs6940079  | 20345367 | 4.89E-01        | N/A      | 22    | rs397709   | 16869048 | 8.73E-01           | MICAL3    | -          | 6.70E-07      | N/A      | N/A      | 9867    |                                 |
| 8     | rs2409096  | 8729887  | 1.70E-01        | MFHAS1   | 21    | rs4143412  | 27317398 | 1.06E-01           | N/A       | -          | 6.70E-07      | 3.48E-01 | 2.02E-03 | 9868    |                                 |
| 1     | rs6701594  | 78749158 | 9.42E-01        | PTGFR    | 10    | rs11257877 | 12622719 | 8.07E-01           | CAMK1D    | -          | 6.70E-07      | 1.31E-01 | 2.91E-06 | 9869    |                                 |
| 12    | rs12582525 | 95573516 | 6.78E-02        | N/A      | 15    | rs12594730 | 37442648 | 6.90E-01           | N/A       | -          | 6.70E-07      | 2.64E-01 | 3.14E-06 | 9870    |                                 |
| 9     | rs1575506  | 84978642 | 6.88E-01        | N/A      | 13    | rs204566   | 31559712 | 9.31E-01           | FRY       | -          | 6.70E-07      | 6.20E-01 | 6.41E-04 | 9871    |                                 |
| 1     | rs1575983  | 75034784 | 6.69E-01        | N/A      | 7     | rs7779412  | 1.49E+08 | 7.42E-01           | N/A       | -          | 6.71E-07      | 9.04E-02 | 3.19E-03 | 9872    |                                 |
| 10    | rs927935   | 14862497 | 4.34E-01        | FAM107B  | 16    | rs1792390  | 58144475 | 1.38E-01           | N/A       | -          | 6.71E-07      | 1.01E-01 | 7.04E-03 | 9873    |                                 |
| 5     | rs2120349  | 1.13E+08 | 1.97E-01        | MCC      | 12    | rs1180715  | 74531784 | 1.30E-01           | N/A       | -          | 6.71E-07      | 9.88E-01 | 8.36E-04 | 9874    |                                 |
| 7     | rs1839115  | 1.14E+08 | 6.07E-02        | N/A      | 18    | rs7229532  | 71822526 | 2.09E-02           | N/A       | -          | 6.71E-07      | 3.95E-01 | 1.36E-03 | 9875    |                                 |
| 6     | rs17058986 | 99537921 | 6.53E-01        | N/A      | 11    | rs11226342 | 1.04E+08 | 7.81E-01           | N/A       | -          | 6.71E-07      | 8.68E-01 | 2.05E-05 | 9876    |                                 |
| 1     | rs6670965  | 5619264  | 7.11E-01        | N/A      | 9     | rs4742469  | 8211247  | 1.90E-01           | N/A       | -          | 6.71E-07      | 9.58E-01 | 1.14E-04 | 9877    |                                 |
| 8     | rs12676876 | 69767325 | 1.32E-01        | C8orf34  | 10    | rs7918637  | 1.08E+08 | 4.52E-01           | N/A       | -          | 6.71E-07      | 5.73E-01 | 3.00E-04 | 9878    |                                 |
| 3     | rs7653203  | 34963263 | 2.37E-01        | N/A      | 8     | rs4925813  | 1.46E+08 | 3.21E-01           | KIAA1688  | -          | 6.71E-07      | 8.62E-01 | 4.80E-05 | 9879    |                                 |
| 9     | rs7027958  | 89408167 | 9.00E-01        | DAPK1    | 18    | rs7236585  | 68490525 | 5.74E-01           | N/A       | -          | 6.71E-07      | 4.82E-01 | 1.87E-04 | 9880    |                                 |
| 2     | rs4851111  | 1.06E+08 | 7.20E-01        | C2orf40  | 2     | rs4315535  | 1.22E+08 | 9.89E-01           | N/A       | -          | 6.71E-07      | N/A      | N/A      | 9881    |                                 |
| 10    | rs10828431 | 23663529 | 6.97E-01        | C10orf67 | 10    | rs3127449  | 78939737 | 2.30E-01           | KCNMA1    | -          | 6.71E-07      | 4.68E-02 | 3.52E-03 | 9882    |                                 |
| 12    | rs2079548  | 1.25E+08 | 3.16E-01        | N/A      | 13    | rs648241   | 96126061 | 9.10E-01           | HS6ST3    | -          | 6.71E-07      | 7.24E-01 | 1.28E-04 | 9883    |                                 |
| 1     | rs1103577  | 1.57E+08 | 2.54E-01        | N/A      | 13    | rs1358045  | 84317028 | 7.01E-02           | N/A       | -          | 6.71E-07      | N/A      | N/A      | 9884    |                                 |
| 1     | rs1103577  | 1.57E+08 | 2.54E-01        | N/A      | 13    | rs1554724  | 84314824 | 7.01E-02           | N/A       | -          | 6.71E-07      | N/A      | N/A      | 9885    |                                 |
| 4     | rs6837396  | 7470118  | 4.87E-01        | SORCS2   | 14    | rs6575528  | 95133483 | 1.34E-02           | N/A       | -          | 6.71E-07      | 2.85E-01 | 1.74E-06 | 9886    |                                 |
| 4     | rs10517791 | 1.65E+08 | 9.65E-01        | 1-Mar    | 5     | rs407360   | 2661294  | 4.02E-01           | N/A       | -          | 6.71E-07      | 8.66E-01 | 8.28E-05 | 9887    |                                 |
| 6     | rs9394952  | 43509083 | 3.01E-01        | ABCC10   | 5     | rs10042881 | 1.64E+08 | 6.35E-01           | N/A       | -          | 6.71E-07      | N/A      | N/A      | 9888    |                                 |
| 1     | rs7536290  | 2.29E+08 | 6.46E-01        | COG2     | 3     | rs635255   | 1.75E+08 | 6.62E-01           | NLGN1     | -          | 6.71E-07      | 2.06E-01 | 1.78E-03 | 9889    |                                 |
| 5     | rs1363880  | 33867062 | 8.01E-01        | ADAMTS12 | 16    | rs16955751 | 80288734 | 3.15E-01           | CMIP      | -          | 6.71E-07      | 2.54E-01 | 6.84E-06 | 9890    |                                 |
| 11    | rs4237707  | 15401081 | 3.42E-01        | N/A      | 17    | rs9893316  | 6226092  | 6.30E-01           | N/A       | -          | 6.72E-07      | 1.34E-01 | 1.51E-06 | 9891    |                                 |
| 4     | rs7699839  | 1.55E+08 | 2.45E-01        | N/A      | 22    | rs2017317  | 43577722 | 4.18E-01           | ARHGAP8   | -          | 6.72E-07      | 9.28E-01 | 5.67E-05 | 9892    |                                 |
| 4     | rs218269   | 55105896 | 4.94E-01        | N/A      | 10    | rs7913144  | 17025772 | 3.26E-04           | CUBN      | -          | 6.72E-07      | 9.73E-01 | 8.31E-05 | 9893    |                                 |
| 4     | rs218268   | 55105844 | 4.94E-01        | N/A      | 10    | rs7913144  | 17025772 | 3.26E-04           | CUBN      | -          | 6.72E-07      | 9.75E-01 | 8.22E-05 | 9894    |                                 |
| 5     | rs12186500 | 1.8E+08  | 6.78E-01        | OR2Y1    | 11    | rs2237886  | 2767307  | 6.31E-01           | KCNQ1     | -          | 6.72E-07      | 4.86E-01 | 2.47E-05 | 9895    |                                 |
| 7     | rs12668378 | 53976764 | 6.25E-01        | N/A      | 11    | rs4943997  | 72137803 | 1.49E-01           | STARD10   | -          | 6.72E-07      | 7.79E-01 | 6.65E-04 | 9896    |                                 |
| 11    | rs7127839  | 41969521 | 4.60E-01        | N/A      | 17    | rs4969113  | 68873429 | 5.85E-01           | SDK2      | -          | 6.72E-07      | N/A      | N/A      | 9897    |                                 |
| 7     | rs17668138 | 53036313 | 4.40E-01        | N/A      | 18    | rs2169014  | 8354598  | 2.87E-01           | PTPRM     | -          | 6.72E-07      | 7.08E-01 | 6.17E-04 | 9898    |                                 |
| 7     | rs17735671 | 53034984 | 4.40E-01        | N/A      | 18    | rs2169014  | 8354598  | 2.87E-01           | PTPRM     | -          | 6.72E-07      | 8.53E-01 | 4.54E-04 | 9899    |                                 |
| 5     | rs7710366  | 1.14E+08 | 1.78E-01        | KCNN2    | 10    | rs1540957  | 10228122 | 7.48E-01           | N/A       | -          | 6.72E-07      | 8.67E-01 | 2.54E-04 | 9900    |                                 |
| 14    | rs1570265  | 95105664 | 1.29E-01        | N/A      | 22    | rs2051582  | 35888302 | 3.16E-01           | IL2RB     | -          | 6.72E-07      | 9.35E-01 | 3.61E-05 | 9901    |                                 |
| 6     | rs9460417  | 19924836 | 6.98E-01        | N/A      | 17    | rs9898958  | 52597241 | 8.45E-01           | N/A       | -          | 6.72E-07      | 9.69E-01 | 3.88E-05 | 9902    |                                 |
| 1     | rs13375867 | 1E+08    | 4.39E-01        | SASS6    | 20    | rs2022259  | 5412732  | 8.55E-01           | LOC149837 | -          | 6.72E-07      | 3.30E-01 | 7.12E-04 | 9903    |                                 |
| 11    | rs883752   | 44593415 | 5.75E-01        | CD82     | 14    | rs744439   | 95277543 | 7.26E-01           | N/A       | -          | 6.72E-07      | 7.53E-01 | 1.09E-04 | 9904    |                                 |
| 1     | rs7418365  | 9457890  | 1.94E-01        | N/A      | 1     | rs987495   | 78868169 | 7.90E-01           | IFI44L    | -          | 6.72E-07      | 9.30E-01 | 1.44E-04 | 9905    |                                 |
| 8     | rs11136431 | 1778840  | 7.32E-01        | ARHGEF10 | 19    | rs4808883  | 18915720 | 8.32E-02           | HOMER3    | -          | 6.72E-07      | 9.84E-01 | 2.93E-04 | 9906    |                                 |
| 1     | rs1329961  | 85823288 | 3.32E-01        | DDAH1    | 10    | rs7069288  | 20992966 | 3.74E-01           | N/A       | -          | 6.72E-07      | 7.05E-01 | 8.83E-05 | 9907    |                                 |
| 2     | rs10490386 | 1.5E+08  | 2.60E-02        | LTPD6B   | 14    | rs1275689  | 68882032 | 3.17E-01           | GALNTL1   | -          | 6.72E-07      | 9.57E-02 | 9.33E-07 | 9908    |                                 |
| 2     | rs16846013 | 2.12E+08 | 2.86E-01        | ERBB4    | 13    | rs1415707  | 97294596 | 1.04E-01           | N/A       | -          | 6.72E-07      | 9.40E-01 | 8.14E-05 | 9909    |                                 |
| 4     | rs10518379 | 1.22E+08 | 1.36E-01        | PRDM5    | 12    | rs4463925  | 14153103 | 3.61E-01           | N/A       | -          | 6.73E-07      | 4.57E-01 | 4.38E-05 | 9910    |                                 |
| 6     | rs9366347  | 20474041 | 3.52E-01        | N/A      | 8     | rs7839852  | 28761984 | 4.66E-01           | INTS9     | -          | 6.73E-07      | 9.31E-01 | 7.12E-05 | 9911    |                                 |
| 7     | rs38536    | 81629463 | 5.58E-01        | CACNA2D1 | 17    | rs16957494 | 8490252  | 8.30E-02           | MYH10     | -          | 6.73E-07      | 1.38E-02 | 1.25E-07 | 9912    |                                 |
| 7     | rs1357887  | 54379297 | 8.25E-01        | N/A      | 11    | rs11025966 | 21197248 | 8.19E-01           | NELL1     | -          | 6.73E-07      | 3.21E-01 | 2.46E-04 | 9913    |                                 |
| 5     | rs1549225  | 1.75E+08 | 7.03E-01        | N/A      | 18    | rs1370827  | 41812161 | 3.78E-01           | KIAA1632  | -          | 6.73E-07      | 6.68E-01 | 9.39E-06 | 9914    |                                 |
| 2     | rs17452616 | 1.16E+08 | 4.34E-01        | PDLP10   | 9     | rs2006996  | 1.17E+08 | 2.03E-01           | N/A       | -          | 6.73E-07      | 6.78E-01 | 8.66E-05 | 9915    |                                 |
| 3     | rs9830035  | 1.73E+08 | 6.63E-01        | PLD1     | 13    | rs625052   | 45700669 | 6.41E-01           | N/A       | -          | 6.73E-07      | 3.65E-01 | 2.33E-06 | 9916    |                                 |
| 1     | rs333970   | 1.1E+08  | 9.57E-01        | CSF1     | 14    | rs10134155 | 46895886 | 8.42E-01           | MDGA2     | -          | 6.73E-07      | 6.92E-01 | 4.25E-05 | 9917    |                                 |
| 2     | rs7597348  | 2.32E+08 | 6.17E-02        | NMUR1    | 15    | rs8023615  | 51862838 | 2.76E-01           | N/A       | -          | 6.73E-07      | 2.69E-01 | 6.94E-04 | 9918    |                                 |
| 7     | rs324383   | 34737020 | 8.38E-01        | N/A      | 10    | rs11257470 | 6317562  | 8.80E-01           | PFKFB3    | -          | 6.73E-07      | 4.29E-01 | 1.92E-05 | 9919    |                                 |
| 9     | rs563006   | 18740076 | 4.24E-01        | ADAMTSL1 | 14    | rs17096095 | 29402713 | 8.65E-01           | PRKD1     | -          | 6.73E-07      | 4.37E-01 | 3.05E-06 | 9920    |                                 |
| 6     | rs375435   | 42769382 | 4.69E-01        | UBR2     | 9     | rs12552818 | 1.04E+08 | 3.09E-02           | N/A       | -          | 6.73E-07      | 6.38E-01 | 5.41E-04 | 9921    |                                 |
| 14    | rs11158751 | 68101178 | 8.01E-01        | RAD51L1  | 20    | rs1078342  | 42829628 | 3.94E-01           | RIMS4     | -          | 6.73E-07      | 5.38E-01 | 3.12E-05 | 9922    |                                 |
| 2     | rs12617902 | 2.13E+08 | 9.26E-01        | N/A      | 12    | rs4764852  | 1.01E+08 | 5.46E-01           | DRAM1     | -          | 6.73E-07      | 1.75E-01 | 3.65E-06 | 9923    |                                 |
| 1     | rs7526237  | 1.45E+08 | 1.90E-02        | SCCPDH   | 20    | rs24424239 | 19560584 | 2.37E-01           | SLC24A3   | -          | 6.73E-07      | 5.95E-01 | 1.86E-04 | 9924    |                                 |
| 7     | rs681514   | 2.28E+08 | 3.01E-01        | N/A      | 18    | rs273700   | 21434903 | 6.88E-01           | N/A       | -          | 6.73E-07      | 6.84E-01 | 5.21E-05 | 9925    |                                 |
| 6     | rs3873380  | 31370417 | 5.25E-01        | N/A      | 18    | rs1443005  | 26237044 | 6.06E-01           | N/A       | MHC        | 6.73E-07      | 8.19E-01 | 1        |         |                                 |

| SNP A |            |          |                 |          | SNP B |           |          |                      |          | MHC region | Interaction P |          |          | Ranking | Cluster in top 100 interactions |
|-------|------------|----------|-----------------|----------|-------|-----------|----------|----------------------|----------|------------|---------------|----------|----------|---------|---------------------------------|
| CHR   | SNP        | Location | gle locus P val | Gene     | CHR   | SNP       | Location | single locus P value | Gene     |            | Stage 1       | Stage 2  | Combined |         |                                 |
| 6     | rs1570682  | 18447816 | 1.01E-01        | N/A      | 18    | rs4940094 | 47326799 | 4.73E-01             | N/A      | -          | 6.75E-07      | 2.72E-01 | 2.81E-03 | 9967    |                                 |
| 2     | rs4261706  | 2.29E+08 | 7.85E-01        | N/A      | 4     | rs7663484 | 1.83E+08 | 1.69E-01             | N/A      | -          | 6.75E-07      | 4.41E-01 | 2.52E-05 | 9968    |                                 |
| 2     | rs4261706  | 2.29E+08 | 7.85E-01        | N/A      | 4     | s10520476 | 1.83E+08 | 1.69E-01             | N/A      | -          | 6.75E-07      | 4.90E-01 | 3.40E-05 | 9969    |                                 |
| 4     | rs995302   | 1.64E+08 | 6.15E-01        | N/A      | 13    | rs7331053 | 22946593 | 9.15E-01             | N/A      | -          | 6.75E-07      | 1.05E-01 | 2.69E-03 | 9970    |                                 |
| 6     | rs207269   | 90884890 | 4.28E-01        | N/A      | 17    | rs2412324 | 45887792 | 3.39E-01             | ACSF2    | -          | 6.75E-07      | 1.92E-01 | 3.77E-05 | 9971    |                                 |
| 17    | rs4247113  | 228978   | 3.41E-01        | N/A      | 22    | rs5762713 | 27331789 | 9.86E-01             | TTC28    | -          | 6.75E-07      | 6.32E-01 | 1.90E-04 | 9972    |                                 |
| 17    | rs917343   | 66910901 | 9.59E-01        | N/A      | 20    | s11908316 | 31923904 | 6.53E-01             | CHMP4B   | -          | 6.75E-07      | 9.46E-02 | 4.15E-03 | 9973    |                                 |
| 5     | rs149352   | 94224367 | 7.77E-01        | MCTP1    | 8     | rs4925813 | 1.46E+08 | 3.21E-01             | KIAA1688 | -          | 6.75E-07      | 2.00E-01 | 9.11E-04 | 9974    |                                 |
| 1     | rs428913   | 1.51E+08 | 1.35E-01        | SPRR2F   | 7     | rs4718885 | 68527153 | 5.67E-01             | N/A      | -          | 6.75E-07      | 2.36E-01 | 8.15E-05 | 9975    |                                 |
| 4     | rs1400363  | 1.04E+08 | 5.58E-01        | N/A      | 16    | s11075616 | 64631826 | 7.21E-01             | N/A      | -          | 6.75E-07      | 7.59E-01 | 2.24E-04 | 9976    |                                 |
| 6     | rs8180555  | 52323747 | 1.78E-01        | PAQR8    | 5     | rs6887463 | 10585639 | 1.73E-01             | N/A      | -          | 6.75E-07      | 9.99E-01 | 1.72E-04 | 9977    |                                 |
| 1     | rs4623759  | 1.06E+08 | 5.89E-01        | N/A      | 4     | rs4862943 | 32267666 | 9.85E-01             | N/A      | -          | 6.76E-07      | 8.24E-01 | 2.12E-04 | 9978    |                                 |
| 2     | rs12712127 | 1.02E+08 | 3.78E-01        | N/A      | 3     | rs6776532 | 1.49E+08 | 8.34E-01             | N/A      | -          | 6.76E-07      | N/A      | N/A      | 9979    |                                 |
| 5     | rs6451392  | 38625773 | 8.09E-01        | LIFR     | 19    | rs8112157 | 7762561  | 8.90E-01             | CLEC4GP1 | -          | 6.76E-07      | 7.58E-01 | 2.49E-04 | 9980    |                                 |
| 6     | rs9342488  | 66395599 | 5.83E-02        | EYS      | 18    | rs1944572 | 44120241 | 3.35E-01             | N/A      | -          | 6.76E-07      | 3.51E-01 | 4.57E-04 | 9981    |                                 |
| 6     | rs9354270  | 66397310 | 5.83E-02        | EYS      | 18    | rs1944572 | 44120241 | 3.35E-01             | N/A      | -          | 6.76E-07      | 3.51E-01 | 4.57E-04 | 9982    |                                 |
| 3     | rs4683070  | 45174624 | 4.12E-01        | CDCP1    | 20    | rs6135128 | 14290719 | 4.45E-02             | MACROD2  | -          | 6.76E-07      | 6.33E-01 | 4.28E-05 | 9983    |                                 |
| 9     | rs10780262 | 80652948 | 6.91E-01        | N/A      | 9     | rs4448343 | 97306191 | 1.13E-01             | PTCH1    | -          | 6.77E-07      | 2.77E-01 | 5.43E-06 | 9984    |                                 |
| 8     | rs2653416  | 17770143 | 5.19E-01        | FGL1     | 16    | rs208625  | 22836323 | 6.40E-02             | HS3ST2   | -          | 6.77E-07      | 5.79E-01 | 6.74E-05 | 9985    |                                 |
| 3     | rs10514728 | 71950859 | 1.52E-01        | N/A      | 11    | rs1303932 | 40333204 | 9.59E-01             | N/A      | -          | 6.77E-07      | 2.67E-01 | 3.51E-03 | 9986    |                                 |
| 2     | rs1905925  | 1.41E+08 | 9.36E-01        | LRP1B    | 4     | rs7672552 | 23620706 | 1.34E-01             | N/A      | -          | 6.77E-07      | 6.21E-01 | 3.03E-04 | 9987    |                                 |
| 2     | rs6430913  | 1.41E+08 | 9.36E-01        | LRP1B    | 4     | rs7672552 | 23620706 | 1.34E-01             | N/A      | -          | 6.77E-07      | 6.21E-01 | 3.03E-04 | 9988    |                                 |
| 5     | rs4835942  | 1.27E+08 | 9.25E-01        | FLJ33630 | 7     | rs2969078 | 2445555  | 6.51E-01             | CHST12   | -          | 6.77E-07      | 3.72E-01 | 1.85E-03 | 9989    |                                 |
| 4     | rs7680050  | 1.85E+08 | 9.17E-01        | N/A      | 8     | rs6983185 | 1.32E+08 | 5.53E-01             | N/A      | -          | 6.77E-07      | 6.24E-01 | 5.48E-05 | 9990    |                                 |
| 6     | rs6902731  | 75274664 | 2.02E-01        | N/A      | 11    | s10750171 | 1.2E+08  | 7.13E-01             | POU2F3   | -          | 6.77E-07      | 8.63E-01 | 3.32E-05 | 9991    |                                 |
| 3     | rs7628262  | 1.35E+08 | 1.64E-01        | BFSP2    | 4     | rs2042630 | 1.42E+08 | 8.40E-02             | RNF150   | -          | 6.77E-07      | 4.74E-01 | 6.11E-04 | 9992    |                                 |
| 2     | rs4047536  | 44232458 | 9.70E-01        | PPM1B    | 16    | s17266222 | 13457361 | 3.98E-02             | N/A      | -          | 6.77E-07      | 5.44E-01 | 1.74E-03 | 9993    |                                 |
| 9     | rs7048503  | 79659381 | 8.79E-01        | GN/AQ    | 17    | rs8073077 | 76809616 | 1.48E-01             | AZI1     | -          | 6.77E-07      | 8.55E-01 | 2.13E-04 | 9994    |                                 |
| 5     | rs3805525  | 31437710 | 4.89E-01        | RN/ASEN  | 20    | rs1012891 | 7928390  | 3.29E-01             | TMX4     | -          | 6.77E-07      | 1.19E-01 | 2.57E-03 | 9995    |                                 |
| 2     | rs1317824  | 540644   | 4.10E-01        | N/A      | 18    | rs812573  | 984149   | 5.88E-01             | N/A      | -          | 6.77E-07      | 6.78E-01 | 2.82E-05 | 9996    |                                 |
| 10    | rs11201128 | 86370207 | 7.10E-01        | N/A      | 20    | rs6048810 | 23394429 | 3.23E-01             | CST11    | -          | 6.77E-07      | 9.18E-03 | 2.21E-07 | 9997    |                                 |
| 8     | rs11989948 | 5159862  | 1.24E-01        | N/A      | 12    | rs3825181 | 1.28E+08 | 7.31E-01             | SLC15A4  | -          | 6.77E-07      | 6.72E-01 | 4.82E-04 | 9998    |                                 |
| 14    | rs4900876  | 48493149 | 9.10E-01        | N/A      | 16    | s10514506 | 79278578 | 9.46E-01             | CDYL2    | -          | 6.77E-07      | 9.14E-01 | 2.69E-05 | 9999    |                                 |
| 3     | rs9854853  | 1.28E+08 | 9.36E-01        | N/A      | 10    | rs1660627 | 34510310 | 7.97E-01             | N/A      | -          | 6.77E-07      | N/A      | N/A      | 10000   |                                 |
